# Supplementary material for: Proteomic Identification Reveals the Role of Ciliary Extracellular‐Like Vesicle in Cardiovascular Function
Source: PubMed Central journal article supplement (PMC7435257; doi:10.1002/advs.201903140), 2020-06-16
Supplement: ADVS-7-1903140-s006.pdf [file ADVS-7-1903140-s006.pdf]

**Supplementary Table 2**

| Accession#       | Description                                                  | Sequence Coverage |        | Spectral Count |       |       | Classification | Reference |
|------------------|--------------------------------------------------------------|-------------------|--------|----------------|-------|-------|----------------|-----------|
|                  |                                                              | Whole Cells       | Cilia  | Whole Cells    | Cilia | Ratio |                |           |
| tr F1RWN4 F1RWN4 | 14 kDa phosphohistidine phosphatase                          | 0.00%             | 11.90% | 0.00           | 3.00  | HIGH  | New            | N/A       |
| tr F1S367 F1S367 | 4-hydroxyphenylpyruvate dioxygenase                          | 0.00%             | 2.17%  | 0.00           | 0.33  | HIGH  | New            | N/A       |
| P80387           | 5'-AMP-activated protein kinase subunit beta-1               | 0.00%             | 11.10% | 0.00           | 3.00  | HIGH  | New I          | N/A       |
| tr F1RL45 F1RL45 | 5'-AMP-activated protein kinase subunit beta-1               | 0.00%             | 24.60% | 0.00           | 3.00  | HIGH  | New I          | N/A       |
| Q09138           | 5'-AMP-activated protein kinase subunit gamma-1              | 0.00%             | 6.10%  | 0.00           | 1.00  | HIGH  | New            | N/A       |
| P49666           | 60S ribosomal protein L21                                    | 0.00%             | 17.70% | 0.00           | 2.50  | HIGH  | Known          | 1         |
| Q29187           | 60S ribosomal protein L4 (Fragment)                          | 0.00%             | 10.90% | 0.00           | 0.50  | HIGH  | Known          | 2         |
| Q2HYU2           | 6-phosphofructokinase, muscle type                           | 0.00%             | 1.50%  | 0.00           | 2.50  | HIGH  | Known I        | 3         |
| tr I3LCA1 I3LCA1 | 6-phosphofructokinase, muscle type                           | 0.00%             | 1.20%  | 0.00           | 2.50  | HIGH  | Known I        | 3         |
| tr F1SKQ9 F1SKQ9 | Actin-related protein 2/3 complex subunit 5                  | 0.00%             | 36.60% | 0.00           | 3.00  | HIGH  | Known          | 4         |
| P58780           | Adenosine deaminase CECR1                                    | 0.00%             | 5.30%  | 0.00           | 0.50  | HIGH  | New            | N/A       |
| tr I3LN54 I3LN54 | ADP-ribosylation factor-like protein 6-interacting protein 1 | 0.00%             | 9.35%  | 0.00           | 5.00  | HIGH  | New            | N/A       |
| tr I6L6E1 I6L6E1 | Aldehyde dehydrogenase                                       | 0.00%             | 4.00%  | 0.00           | 36.00 | HIGH  | New I          | N/A       |
| tr V9GZ89 V9GZ89 | Aldehyde dehydrogenase                                       | 0.00%             | 2.40%  | 0.00           | 31.50 | HIGH  | New I          | N/A       |

|                  |                                                          |       |        |      |       |      |         |     |
|------------------|----------------------------------------------------------|-------|--------|------|-------|------|---------|-----|
| tr F1SDC4 F1SDC4 | Aldehyde dehydrogenase (Fragment)                        | 0.00% | 2.50%  | 0.00 | 0.50  | HIGH | New I   | N/A |
| tr F1SMT7 F1SMT7 | Alkaline phosphatase                                     | 0.00% | 4.90%  | 0.00 | 0.50  | HIGH | New I   | 5   |
| tr I3LB86 I3LB86 | Alkaline phosphatase                                     | 0.00% | 6.45%  | 0.00 | 79.50 | HIGH | New I   | 5   |
| P50447           | Alpha-1-antitrypsin                                      | 0.00% | 3.10%  | 0.00 | 12.00 | HIGH | New I   | N/A |
| tr F1SCF0 F1SCF0 | Alpha-1-antitrypsin                                      | 0.00% | 3.10%  | 0.00 | 12.00 | HIGH | New I   | N/A |
| Q8MJ76           | Alpha-fetoprotein                                        | 0.00% | 1.30%  | 0.00 | 13.00 | HIGH | New     | N/A |
| P15145           | Aminopeptidase N                                         | 8.25% | 15.77% | 8.50 | 62.00 | 7.29 | New I,* | 6   |
| tr F1SK03 F1SK03 | Aminopeptidase N                                         | 8.25% | 16.80% | 8.50 | 62.67 | 7.37 | New I   | N/A |
| tr F1SGY1 F1SGY1 | Anoctamin                                                | 0.45% | 0.60%  | 3.00 | 6.33  | 2.11 | Known   | 7,8 |
| F1SPM8           | AP2-associated protein kinase 1                          | 0.00% | 1.05%  | 0.00 | 5.50  | HIGH | Known I | 4   |
| tr I3L548 I3L548 | AP2-associated protein kinase 1                          | 0.00% | 1.05%  | 0.00 | 5.50  | HIGH | Known I | 4   |
| Q2LE37           | Apolipoprotein M                                         | 0.00% | 4.00%  | 0.00 | 2.00  | HIGH | New I   | N/A |
| tr A5D9L6 A5D9L6 | Apolipoprotein M                                         | 0.00% | 6.45%  | 0.00 | 2.00  | HIGH | New I   | N/A |
| tr B6DZ39 B6DZ39 | APPL2                                                    | 0.00% | 1.30%  | 0.00 | 0.33  | HIGH | New     | N/A |
| Q35915           | ATP synthase subunit a                                   | 0.00% | 6.20%  | 0.00 | 1.00  | HIGH | Known   | 9   |
| tr A5GFS1 A5GFS1 | ATPase, Class II, type 9A                                | 0.00% | 2.00%  | 0.00 | 1.00  | HIGH | New     | N/A |
| tr K7GT44 K7GT44 | ATPase, Cu <sup>++</sup> transporting, alpha polypeptide | 0.00% | 0.57%  | 0.00 | 0.33  | HIGH | New     | N/A |

|                  |                                                                                  |       |        |      |      |      |         |     |
|------------------|----------------------------------------------------------------------------------|-------|--------|------|------|------|---------|-----|
| Q8MIB3           | ATP-binding cassette sub-family G member 2                                       | 0.00% | 1.83%  | 0.00 | 3.00 | HIGH | New I   | 10  |
| tr F1RW52 F1RW52 | ATP-binding cassette sub-family G member 2                                       | 0.00% | 1.83%  | 0.00 | 3.00 | HIGH | New I   | 10  |
| tr K7GLY4 K7GLY4 | ATP-binding cassette sub-family G member 2                                       | 0.00% | 6.30%  | 0.00 | 4.50 | HIGH | New I   | 10  |
| tr K7GPH3 K7GPH3 | ATP-binding cassette sub-family G member 2                                       | 0.00% | 6.80%  | 0.00 | 4.50 | HIGH | New I   | 10  |
| tr K7GQE8 K7GQE8 | ATP-binding cassette sub-family G member 2                                       | 0.00% | 5.75%  | 0.00 | 5.00 | HIGH | New I   | 10  |
| tr F1SI55 F1SI55 | Basic leucine zipper and W2 domain-containing protein 1                          | 0.00% | 6.30%  | 0.00 | 2.00 | HIGH | New     | N/A |
| tr A7XP20 A7XP20 | B-cell CLL/lymphoma 10                                                           | 0.00% | 14.20% | 0.00 | 0.50 | HIGH | New     | N/A |
| A5A769           | Biogenesis of lysosome-related organelles complex 1 subunit 3                    | 0.00% | 8.00%  | 0.00 | 0.50 | HIGH | New     | N/A |
| tr F1SI16 F1SI16 | Bone morphogenetic protein type II receptor (BMP2)                               | 0.00% | 4.30%  | 0.00 | 2.50 | HIGH | Known   | 11  |
| tr Q7JFN4 Q7JFN4 | Calcium/calmodulin-dependent protein kinase II isoform gamma-B                   | 1.85% | 2.50%  | 0.50 | 2.67 | 5.33 | New     | N/A |
| tr Q7JFN3 Q7JFN3 | Calcium/calmodulin-dependent protein kinase II isoform gamma-C protein kinase II | 1.90% | 2.63%  | 0.50 | 2.67 | 5.33 | New     | N/A |
| tr Q7JFN2 Q7JFN2 | Calcium/calmodulin-dependent protein kinase II isoform gamma-G                   | 1.75% | 2.43%  | 0.50 | 2.67 | 5.33 | New     | N/A |
| tr F1SUV9 F1SUV9 | Caspase                                                                          | 0.00% | 5.70%  | 0.00 | 0.50 | HIGH | Known I | 12  |
| tr I3L9A3 I3L9A3 | Caspase                                                                          | 0.00% | 6.00%  | 0.00 | 0.50 | HIGH | Known I | 12  |
| Q29288           | C-C motif chemokine 5                                                            | 0.00% | 8.00%  | 0.00 | 1.33 | HIGH | Known I | 13  |
| tr K7GLL8 K7GLL8 | C-C motif chemokine 5                                                            | 0.00% | 4.87%  | 0.00 | 1.33 | HIGH | Known I | 13  |
| tr Q2EN89 Q2EN89 | C-C motif chemokine 5                                                            | 0.00% | 4.40%  | 0.00 | 1.33 | HIGH | Known I | 13  |

|                  |                                                           |        |        |      |       |      |           |       |
|------------------|-----------------------------------------------------------|--------|--------|------|-------|------|-----------|-------|
| Q8WMQ3           | CD9 antigen                                               | 0.00%  | 7.10%  | 0.00 | 1.00  | HIGH | Known I,* | 2,14  |
| tr I3LPR3 I3LPR3 | CD9 antigen                                               | 0.00%  | 18.60% | 0.00 | 18.50 | HIGH | Known I   | 2     |
| tr K7GMI9 K7GMI9 | CD9 antigen                                               | 0.00%  | 30.40% | 0.00 | 18.50 | HIGH | Known I   | 2     |
| tr K7GLH2 K7GLH2 | Cell division control protein 42 homolog                  | 24.40% | 32.57% | 2.00 | 5.00  | 2.50 | Known I   | 15    |
| tr K7GMZ6 K7GMZ6 | Cell division control protein 42 homolog                  | 18.60% | 24.83% | 2.00 | 5.00  | 2.50 | Known I   | 15    |
| tr K7GR85 K7GR85 | Cell division control protein 42 homolog                  | 26.80% | 35.77% | 2.00 | 5.00  | 2.50 | Known I   | 15    |
| F1S584           | Choline transporter-like protein 2                        | 0.00%  | 1.50%  | 0.00 | 9.00  | HIGH | New       | N/A   |
| tr I3L6H2 I3L6H2 | Citrate synthase, mitochondrial                           | 0.00%  | 10.70% | 0.00 | 3.00  | HIGH | New       | N/A   |
| tr F2Z540 F2Z540 | C-Jun activation domain binding protein-1                 | 0.00%  | 2.85%  | 0.00 | 2.00  | HIGH | New       | N/A   |
| tr C3VML0 C3VML0 | Claudin                                                   | 0.00%  | 1.90%  | 0.00 | 0.33  | HIGH | Known I,* | 16,17 |
| tr C3VMW5 C3VMW5 | Claudin                                                   | 0.00%  | 7.60%  | 0.00 | 1.00  | HIGH | Known I   | 16    |
| tr I3LHE9 I3LHE9 | Claudin                                                   | 5.45%  | 17.53% | 4.00 | 9.67  | 2.42 | Known I   | 16    |
| tr A5GFW3 A5GFW3 | Cleavage stimulation factor, 3' pre-RNA, subunit 1, 50kDa | 0.00%  | 2.80%  | 0.00 | 0.50  | HIGH | New       | N/A   |
| Q9GLP1           | Coagulation factor V                                      | 0.00%  | 0.30%  | 0.00 | 2.50  | HIGH | New I     | N/A   |
| tr F1RPW2 F1RPW2 | Coagulation factor V                                      | 0.00%  | 0.30%  | 0.00 | 2.50  | HIGH | New I     | N/A   |
| P01025           | Complement C3                                             | 0.00%  | 1.65%  | 0.00 | 17.50 | HIGH | New       | N/A   |
| tr F1SME1 F1SME1 | Complement C5a anaphylatoxin                              | 0.00%  | 0.27%  | 0.00 | 2.00  | HIGH | New       | N/A   |

|                  |                                                |       |        |      |       |      |         |     |
|------------------|------------------------------------------------|-------|--------|------|-------|------|---------|-----|
| Q9TUQ3           | Complement component C7                        | 0.00% | 1.95%  | 0.00 | 42.50 | HIGH | New I   | N/A |
| tr F1SMJ1 F1SMJ1 | Complement component C7                        | 0.00% | 1.17%  | 0.00 | 3.00  | HIGH | New I   | N/A |
| tr I3L9X0 I3L9X0 | Coronin                                        | 0.00% | 2.70%  | 0.00 | 3.00  | HIGH | Known I | 18  |
| tr I3LHE4 I3LHE4 | Coronin                                        | 0.00% | 2.50%  | 0.00 | 3.00  | HIGH | Known I | 18  |
| tr I3LQY3 I3LQY3 | Coronin                                        | 0.00% | 2.50%  | 0.00 | 3.00  | HIGH | Known I | 18  |
| Q29594           | Creatine kinase B-type (Fragment)              | 0.00% | 15.70% | 0.00 | 0.50  | HIGH | New     | N/A |
| O79876           | Cytochrome c oxidase subunit 1                 | 0.00% | 6.60%  | 0.00 | 0.50  | HIGH | New     | N/A |
| Q35916           | Cytochrome c oxidase subunit 3                 | 0.00% | 5.40%  | 0.00 | 1.50  | HIGH | New     | N/A |
| tr F1RJI7 F1RJI7 | Cytochrome c oxidase subunit 6A, mitochondrial | 0.00% | 9.65%  | 0.00 | 4.50  | HIGH | New     | N/A |
| tr F1SIE9 F1SIE9 | Cytochrome P450                                | 0.00% | 0.70%  | 0.00 | 0.33  | HIGH | New     | N/A |
| P00371           | D-amino-acid oxidase                           | 0.00% | 2.47%  | 0.00 | 1.00  | HIGH | New     | N/A |
| tr F1RPB5 F1RPB5 | DCN1-like protein                              | 0.00% | 7.60%  | 0.00 | 0.50  | HIGH | New     | N/A |
| tr F1S8E6 F1S8E6 | Deoxyhypusine hydroxylase                      | 0.00% | 7.60%  | 0.00 | 1.00  | HIGH | New     | N/A |
| tr I3LTI5 I3LTI5 | Deoxyribonuclease (Fragment)                   | 0.00% | 5.90%  | 0.00 | 4.50  | HIGH | New     | N/A |
| Q2QDF0           | Deoxyribonuclease-1-like 1                     | 0.00% | 8.75%  | 0.00 | 5.50  | HIGH | New     | N/A |
| tr I3L719 I3L719 | Dipeptidase                                    | 0.00% | 10.65% | 0.00 | 33.00 | HIGH | Known   | 19  |
| P22412           | Dipeptidase 1                                  | 0.00% | 13.10% | 0.00 | 47.50 | HIGH | Known   | 19  |

|                  |                                                                 |       |        |      |       |      |         |      |
|------------------|-----------------------------------------------------------------|-------|--------|------|-------|------|---------|------|
| P22411           | Dipeptidyl peptidase 4                                          | 4.50% | 7.10%  | 3.50 | 21.67 | 6.19 | New     | N/A  |
| tr F1RZH4 F1RZH4 | Disintegrin and metalloproteinase domain-containing protein 10  | 0.00% | 11.30% | 0.00 | 1.50  | HIGH | Known*  | 4,20 |
| A5GFZ5           | Dolichol-phosphate mannosyltransferase subunit 1                | 0.00% | 4.60%  | 0.00 | 1.00  | HIGH | New     | N/A  |
| tr D9U8D1 D9U8D1 | Dynein, light chain, LC8-type 1                                 | 0.00% | 21.30% | 0.00 | 14.00 | HIGH | New     | 21   |
| Q5GN48           | Dystrophin                                                      | 0.00% | 7.80%  | 0.00 | 2.50  | HIGH | Known I | 22   |
| tr I3LPH8 I3LPH8 | Dystrophin                                                      | 0.00% | 7.00%  | 0.00 | 1.50  | HIGH | Known I | 22   |
| tr F1SPU7 F1SPU7 | Dystrophin (Fragment)                                           | 0.00% | 1.40%  | 0.00 | 2.50  | HIGH | Known I | 22   |
| tr F1SM37 F1SM37 | E3 ubiquitin-protein ligase                                     | 0.00% | 1.95%  | 0.00 | 6.00  | HIGH | New     | N/A  |
| tr I3LV30 I3LV30 | E3 ubiquitin-protein ligase RNF114 (Fragment)                   | 0.00% | 13.80% | 0.00 | 0.50  | HIGH | New     | N/A  |
| tr F1RLP4 F1RLP4 | EFNB2                                                           | 0.00% | 8.10%  | 0.00 | 2.50  | HIGH | New     | N/A  |
| P37176           | Endoglin                                                        | 0.00% | 1.63%  | 0.00 | 0.33  | HIGH | New I   | N/A  |
| tr F1RS03 F1RS03 | Endoglin                                                        | 0.00% | 1.63%  | 0.00 | 0.33  | HIGH | New I   | N/A  |
| tr K7GQF2 K7GQF2 | Endoglin                                                        | 0.00% | 1.73%  | 0.00 | 0.33  | HIGH | New I   | N/A  |
| P35463           | Endothelin B receptor                                           | 0.00% | 3.40%  | 0.00 | 0.50  | HIGH | New     | 23   |
| tr D3K5K6 D3K5K6 | EPH receptor B3                                                 | 0.00% | 1.60%  | 0.00 | 11.00 | HIGH | New     | N/A  |
| P20460           | Eukaryotic translation initiation factor 2 subunit 1 (Fragment) | 0.00% | 18.60% | 0.00 | 1.00  | HIGH | New     | N/A  |
| tr F1SGR0 F1SGR0 | Eukaryotic translation initiation factor 3 subunit M            | 0.00% | 13.10% | 0.00 | 3.00  | HIGH | New     | N/A  |

|                  |                                            |        |        |      |       |      |           |       |
|------------------|--------------------------------------------|--------|--------|------|-------|------|-----------|-------|
| tr B2ZI35 B2ZI35 | F11 receptor                               | 0.00%  | 4.20%  | 0.00 | 24.00 | HIGH | New       | N/A   |
| Q767L6           | Flotillin-1                                | 3.75%  | 3.80%  | 1.00 | 7.00  | 7.00 | Known I,* | 24,25 |
| tr K7GPJ9 K7GPJ9 | Flotillin-1                                | 5.25%  | 5.33%  | 1.00 | 7.00  | 7.00 | Known I   | 24    |
| tr F8S319 F8S319 | Gag protein                                | 0.00%  | 1.15%  | 0.00 | 8.00  | HIGH | New I     | N/A   |
| tr F8S326 F8S326 | Gag protein                                | 0.00%  | 3.80%  | 0.00 | 15.00 | HIGH | New I     | N/A   |
| Q29043           | Galactoside 2-alpha-L-fucosyltransferase 1 | 0.00%  | 1.57%  | 0.00 | 0.33  | HIGH | New I     | N/A   |
| tr F1RIQ8 F1RIQ8 | Galactoside 2-alpha-L-fucosyltransferase 1 | 0.00%  | 1.57%  | 0.00 | 0.33  | HIGH | New I     | N/A   |
| tr I3L8J2 I3L8J2 | Galectin                                   | 0.00%  | 12.80% | 0.00 | 1.00  | HIGH | New I     | N/A   |
| tr I3LIV0 I3LIV0 | Galectin (Fragment)                        | 0.00%  | 12.80% | 0.00 | 1.00  | HIGH | New I     | 26    |
| tr K7GKZ5 K7GKZ5 | Gamma-glutamyltranspeptidase 1             | 0.00%  | 8.40%  | 0.00 | 2.00  | HIGH | Known I   | 27    |
| tr K7GQA6 K7GQA6 | Gamma-glutamyltranspeptidase 1             | 0.00%  | 8.95%  | 0.00 | 2.00  | HIGH | Known I   | 27    |
| tr K7GQU9 K7GQU9 | Gamma-glutamyltranspeptidase 1             | 0.00%  | 9.40%  | 0.00 | 3.00  | HIGH | Known I   | 27    |
| tr K7GRH1 K7GRH1 | Gamma-glutamyltranspeptidase 1             | 0.00%  | 9.00%  | 0.00 | 4.50  | HIGH | Known I   | 27    |
| tr K7GSR0 K7GSR0 | Gamma-glutamyltranspeptidase 1             | 0.00%  | 8.85%  | 0.00 | 2.00  | HIGH | Known I   | 27    |
| tr F1S138 F1S138 | Glutamyl aminopeptidase                    | 5.40%  | 8.43%  | 4.00 | 9.33  | 2.33 | New I     | N/A   |
| tr K7GMS4 K7GMS4 | Glutamyl aminopeptidase                    | 0.00%  | 16.40% | 0.00 | 25.50 | HIGH | New I     | N/A   |
| tr K7GQE4 K7GQE4 | Glutamyl aminopeptidase                    | 15.60% | 20.80% | 1.50 | 4.00  | 2.67 | New I     | N/A   |

|                  |                                                       |       |        |      |        |      |         |     |
|------------------|-------------------------------------------------------|-------|--------|------|--------|------|---------|-----|
| tr K7GT33 K7GT33 | Glutamyl aminopeptidase                               | 4.95% | 8.83%  | 1.00 | 4.33   | 4.33 | New I   | N/A |
| Q8MJ14           | Glutathione peroxidase 1                              | 0.00% | 5.35%  | 0.00 | 7.00   | HIGH | New     | N/A |
| P51781           | Glutathione S-transferase alpha M14                   | 0.00% | 4.07%  | 0.00 | 0.33   | HIGH | New     | N/A |
| tr A3KDL8 A3KDL8 | Glypican 6 (Fragment)                                 | 0.00% | 18.10% | 0.00 | 2.50   | HIGH | New#    | 28  |
| tr A5GFU8 A5GFU8 | GNAS complex locus                                    | 0.00% | 21.30% | 0.00 | 1.00   | HIGH | New     | N/A |
| B2ZHY2           | G-protein coupled receptor 39                         | 0.00% | 2.00%  | 0.00 | 0.50   | HIGH | Known I | 29  |
| tr F1RY26 F1RY26 | G-protein-coupled receptor 39                         | 0.00% | 3.00%  | 0.00 | 0.50   | HIGH | Known I | 29  |
| Q52NJ3           | GTP-binding protein SAR1a                             | 0.00% | 8.60%  | 0.00 | 2.50   | HIGH | New     | N/A |
| tr I7GF95 I7GF95 | Guanine nucleotide binding protein-like 1             | 0.00% | 3.00%  | 0.00 | 0.50   | HIGH | New     | N/A |
| tr A4L2Z4 A4L2Z4 | Guanine nucleotide-binding protein alpha 14           | 0.00% | 4.80%  | 0.00 | 31.00  | HIGH | New     | N/A |
| tr J9JIL1 J9JIL1 | Guanine nucleotide-binding protein G(q) subunit alpha | 0.00% | 9.95%  | 0.00 | 11.00  | HIGH | New     | N/A |
| tr I3LJ42 I3LJ42 | Guanine nucleotide-binding protein subunit gamma      | 0.00% | 33.00% | 0.00 | 10.50  | HIGH | New     | N/A |
| P31006           | Guanylate kinase                                      | 0.00% | 11.10% | 0.00 | 0.50   | HIGH | New     | N/A |
| tr A5A4L7 A5A4L7 | H <sup>+</sup> coupled di/tri-peptide cotransporter 2 | 0.00% | 1.90%  | 0.00 | 0.50   | HIGH | New     | N/A |
| P01965           | Hemoglobin subunit alpha                              | 7.80% | 8.27%  | 3.00 | 14.00  | 4.67 | New     | N/A |
| P02067           | Hemoglobin subunit beta                               | 0.00% | 7.15%  | 0.00 | 545.00 | HIGH | New I   | N/A |
| tr F1RII7 F1RII7 | Hemoglobin subunit beta                               | 0.00% | 7.15%  | 0.00 | 545.00 | HIGH | New I   | N/A |



|                          |                                       |        |        |      |       |      |         |     |
|--------------------------|---------------------------------------|--------|--------|------|-------|------|---------|-----|
| P02101                   | Hemoglobin subunit epsilon            | 0.00%  | 3.05%  | 0.00 | 5.00  | HIGH | New I   | N/A |
| tr F1RII6 F1RII6         | Hemoglobin subunit epsilon            | 0.00%  | 3.05%  | 0.00 | 5.00  | HIGH | New I   | N/A |
| P04246                   | Hemoglobin subunit theta              | 0.00%  | 3.10%  | 0.00 | 5.00  | HIGH | New     | N/A |
| Q2QLE0                   | Hepatocyte growth factor receptor     | 0.00%  | 1.50%  | 0.00 | 1.00  | HIGH | Known   | 30  |
| Q8WNR0                   | High affinity copper uptake protein 1 | 0.00%  | 5.05%  | 0.00 | 2.50  | HIGH | New I   | N/A |
| tr I3LH68 I3LH68         | High affinity copper uptake protein 1 | 0.00%  | 5.05%  | 0.00 | 2.50  | HIGH | New I   | N/A |
| tr F1RHC5 F1RHC5         | Histone H2A                           | 0.00%  | 8.90%  | 0.00 | 1.50  | HIGH | Known I | 31  |
| tr F1RTQ7 F1RTQ7         | Histone H2A                           | 0.00%  | 7.25%  | 0.00 | 16.50 | HIGH | Known I | 31  |
| tr F2Z587 F2Z587         | Histone H2A                           | 0.00%  | 7.30%  | 0.00 | 6.50  | HIGH | Known I | 31  |
| tr F2Z5L6 F2Z5L6         | Histone H2A                           | 0.00%  | 7.30%  | 0.00 | 16.50 | HIGH | Known I | 31  |
| tr I3L7T6 I3L7T6         | Histone H2A                           | 0.00%  | 6.65%  | 0.00 | 16.50 | HIGH | Known I | 31  |
| tr I3LIN8 I3LIN8         | Histone H2A                           | 0.00%  | 9.00%  | 0.00 | 1.50  | HIGH | Known I | 31  |
| tr F2Z5P1 F2Z5P1         | Histone H2A (Fragment)                | 0.00%  | 22.80% | 0.00 | 4.50  | HIGH | Known I | 31  |
| Reverse_sp E2IUK4 HORM1  | HORMA domain-containing protein 1     | 0.00%  | 5.10%  | 0.00 | 0.50  | HIGH | New I   | N/A |
| Reverse_tr F1SS82 F1SS82 | HORMA domain-containing protein 1     | 0.00%  | 5.10%  | 0.00 | 0.50  | HIGH | New I   | N/A |
| tr F1SPN8 F1SPN8         | Hyaluronidase                         | 0.00%  | 4.40%  | 0.00 | 0.50  | HIGH | New     | 32  |
| tr A9QW81 A9QW81         | IFITM1                                | 10.50% | 22.60% | 1.00 | 2.33  | 2.33 | New     | 33  |

|                       |                                              |       |        |      |       |      |         |     |
|-----------------------|----------------------------------------------|-------|--------|------|-------|------|---------|-----|
| tr F1SV93 F1SV93      | Importin subunit alpha                       | 0.00% | 3.25%  | 0.00 | 7.50  | HIGH | New I   | N/A |
| tr I3L9F7 I3L9F7      | Importin subunit alpha                       | 0.00% | 3.50%  | 0.00 | 5.00  | HIGH | New I   | N/A |
| tr F1RTU5 F1RTU5      | Importin subunit alpha (Fragment)            | 0.00% | 1.30%  | 0.00 | 4.50  | HIGH | New I   | N/A |
| P24853                | Insulin-like growth factor-binding protein 2 | 0.00% | 6.65%  | 0.00 | 8.50  | HIGH | Known   | 34  |
| Q52N47                | Integral membrane protein 2B                 | 0.00% | 27.10% | 0.00 | 5.00  | HIGH | New I   | N/A |
| tr F1RK12 F1RK12      | Integral membrane protein 2B                 | 0.00% | 27.10% | 0.00 | 5.00  | HIGH | New I   | N/A |
| tr F1RVY6 F1RVY6      | Integrin beta                                | 0.70% | 1.10%  | 1.00 | 5.67  | 5.67 | New I   | N/A |
| tr I3LF22 I3LF22      | Integrin beta                                | 0.00% | 6.10%  | 0.00 | 15.00 | HIGH | New I   | N/A |
| tr K7GP66 K7GP66      | Integrin beta                                | 0.70% | 1.13%  | 1.00 | 5.67  | 5.67 | New I   | N/A |
| tr K7GPD4 K7GPD4      | Integrin beta                                | 0.70% | 1.13%  | 1.00 | 5.67  | 5.67 | New I   | N/A |
| tr F1RPR7 F1RPR7      | Integrin beta (Fragment)                     | 0.00% | 8.20%  | 0.00 | 1.50  | HIGH | New     | N/A |
| tr K7GNY7 K7GNY7      | Integrin beta-1                              | 0.00% | 9.70%  | 0.00 | 9.50  | HIGH | Known   | 35  |
| Q1RPR6                | Integrin beta-6                              | 0.00% | 5.10%  | 0.00 | 3.50  | HIGH | New     | N/A |
| Q684M4                | Kelch-like ECH-associated protein 1          | 0.00% | 6.40%  | 0.00 | 14.00 | HIGH | New     | N/A |
| Reverse_sp Q9MZS9 KMO | Kynurenine 3-monooxygenase                   | 0.00% | 1.27%  | 0.00 | 0.33  | HIGH | New     | N/A |
| P79385                | Lactadherin                                  | 1.85% | 8.47%  | 3.00 | 8.00  | 2.67 | Known I | 36  |
| P79385                | Lactadherin                                  | 0.00% | 14.20% | 0.00 | 74.50 | HIGH | Known I | 36  |

|                  |                                         |       |        |      |       |      |         |     |
|------------------|-----------------------------------------|-------|--------|------|-------|------|---------|-----|
| tr B2CZF8 B2CZF8 | Lactadherin                             | 1.75% | 8.03%  | 3.00 | 8.00  | 2.67 | Known f | 36  |
| tr B2CZF8 B2CZF8 | Lactadherin                             | 0.00% | 13.45% | 0.00 | 74.50 | HIGH | Known f | 36  |
| A5D9M6           | Large proline-rich protein BAG6         | 0.00% | 0.80%  | 0.00 | 1.00  | HIGH | New f   | N/A |
| tr F1RQX8 F1RQX8 | Large proline-rich protein BAG6         | 0.00% | 0.80%  | 0.00 | 1.00  | HIGH | New f   | N/A |
| tr K7GLD3 K7GLD3 | Large proline-rich protein BAG6         | 0.00% | 3.80%  | 0.00 | 1.00  | HIGH | New f   | N/A |
| tr K7GLG5 K7GLG5 | Large proline-rich protein BAG6         | 0.00% | 5.00%  | 0.00 | 1.00  | HIGH | New f   | N/A |
| tr K7GLR6 K7GLR6 | Large proline-rich protein BAG6         | 0.00% | 3.40%  | 0.00 | 1.00  | HIGH | New f   | N/A |
| tr K7GLU1 K7GLU1 | Large proline-rich protein BAG6         | 0.00% | 1.20%  | 0.00 | 1.00  | HIGH | New f   | N/A |
| tr K7GMR9 K7GMR9 | Large proline-rich protein BAG6         | 0.00% | 2.10%  | 0.00 | 1.00  | HIGH | New f   | N/A |
| Q9GKE8           | Leukocyte surface antigen CD47          | 0.00% | 2.30%  | 0.00 | 43.50 | HIGH | Known f | 37  |
| tr F1SL37 F1SL37 | Leukocyte surface antigen CD47          | 0.00% | 2.45%  | 0.00 | 43.50 | HIGH | Known f | 37  |
| Q5PXT2           | LIM and cysteine-rich domains protein 1 | 0.00% | 3.00%  | 0.00 | 0.50  | HIGH | New f   | N/A |
| tr F1SFK9 F1SFK9 | LIM and cysteine-rich domains protein 1 | 0.00% | 3.20%  | 0.00 | 0.50  | HIGH | New f   | N/A |
| tr F1SCY4 F1SCY4 | Lipase                                  | 0.00% | 6.30%  | 0.00 | 0.50  | HIGH | know    | 38  |
| P12067           | Lysozyme C-1                            | 0.00% | 3.13%  | 0.00 | 1.00  | HIGH | New     | N/A |
| P12068           | Lysozyme C-2                            | 0.00% | 2.73%  | 0.00 | 1.00  | HIGH | New     | N/A |
| P12069           | Lysozyme C-3                            | 0.00% | 2.70%  | 0.00 | 1.00  | HIGH | New     | N/A |

|                          |                                                              |       |        |      |       |      |           |       |
|--------------------------|--------------------------------------------------------------|-------|--------|------|-------|------|-----------|-------|
| P49927                   | Major prion protein                                          | 0.00% | 4.70%  | 0.00 | 2.00  | HIGH | New       | N/A   |
| Q95313                   | Male-enhanced antigen 1                                      | 0.00% | 9.80%  | 0.00 | 0.50  | HIGH | New       | N/A   |
| I3LUP1                   | Mannose-1-phosphate guanyltransferase alpha                  | 0.00% | 5.70%  | 0.00 | 1.00  | HIGH | New       | N/A   |
| P0C5I2                   | Mannose-1-phosphate guanyltransferase beta                   | 0.00% | 5.15%  | 0.00 | 4.00  | HIGH | New I     | N/A   |
| tr F1SPR4 F1SPR4         | Mannose-1-phosphate guanyltransferase beta                   | 0.00% | 5.15%  | 0.00 | 4.00  | HIGH | New I     | N/A   |
| O02839                   | Membrane cofactor protein                                    | 0.00% | 16.30% | 0.00 | 13.00 | HIGH | New       | N/A   |
| tr Q8MHU0 Q8MHU0         | MHC class I antigen                                          | 0.00% | 2.33%  | 0.00 | 1.00  | HIGH | New*      | 39    |
| tr Q85ZW4 Q85ZW4         | MHC class II antigen                                         | 0.00% | 9.10%  | 0.00 | 8.50  | HIGH | Known I,* | 39,40 |
| tr Q8MGP9 Q8MGP9         | MHC class II antigen                                         | 0.00% | 8.80%  | 0.00 | 1.00  | HIGH | Known I   | 40    |
| tr A2SW51 A2SW51         | Monocyte differentiation antigen CD14                        | 0.00% | 8.30%  | 0.00 | 0.50  | HIGH | New       | N/A   |
| P84024                   | Mothers against decapentaplegic homolog 3                    | 0.00% | 6.40%  | 0.00 | 0.50  | HIGH | New       | N/A   |
| tr F1SNW4 F1SNW4         | MYL3                                                         | 0.00% | 2.20%  | 0.00 | 0.33  | HIGH | New       | 41    |
| tr F1RGE3 F1RGE3         | NADH dehydrogenase [ubiquinone] 1 alpha subcomplex subunit 2 | 0.00% | 11.10% | 0.00 | 0.50  | HIGH | New I     | N/A   |
| tr I3LS16 I3LS16         | NADH dehydrogenase [ubiquinone] 1 alpha subcomplex subunit 2 | 0.00% | 11.20% | 0.00 | 0.50  | HIGH | New I     | N/A   |
| tr F1SRG2 F1SRG2         | NADH dehydrogenase [ubiquinone] 1 alpha subcomplex subunit 6 | 0.00% | 11.70% | 0.00 | 0.50  | HIGH | New       | N/A   |
| Q9TDR1                   | NADH-ubiquinone oxidoreductase chain 5                       | 0.00% | 2.00%  | 0.00 | 0.50  | HIGH | New       | N/A   |
| Reverse_tr F1RYP1 F1RYP1 | Neurogenic differentiation factor                            | 0.00% | 2.80%  | 0.00 | 0.50  | HIGH | New I     | N/A   |

|                          |                                     |       |        |      |      |      |       |     |
|--------------------------|-------------------------------------|-------|--------|------|------|------|-------|-----|
| Reverse_tr F1SR46 F1SR46 | Neurogenic differentiation factor   | 0.00% | 3.00%  | 0.00 | 0.50 | HIGH | New I | N/A |
| tr F1SSJ3 F1SSJ3         | Nitric oxide synthase               | 0.00% | 0.90%  | 0.00 | 3.00 | HIGH | Known | 42  |
| Q28969                   | Nitric oxide synthase, endothelial  | 0.00% | 0.85%  | 0.00 | 2.50 | HIGH | Known | 42  |
| tr I3LL54 I3LL54         | Nuclear factor 1                    | 0.00% | 2.70%  | 0.00 | 1.00 | HIGH | New I | N/A |
| tr F1SDA0 F1SDA0         | Nuclear factor 1 (Fragment)         | 0.00% | 2.60%  | 0.00 | 1.00 | HIGH | New I | N/A |
| tr A5GFR1 A5GFR1         | OTTSUSP00000000835                  | 0.00% | 0.57%  | 0.00 | 0.33 | HIGH | New   | N/A |
| tr F1RMJ9 F1RMJ9         | Oxysterol-binding protein           | 0.00% | 2.00%  | 0.00 | 1.00 | HIGH | New I | N/A |
| tr F1RPE0 F1RPE0         | Oxysterol-binding protein           | 0.00% | 1.70%  | 0.00 | 1.00 | HIGH | New I | N/A |
| tr I3LAG4 I3LAG4         | Palmitoyltransferase (Fragment)     | 0.00% | 4.70%  | 0.00 | 1.50 | HIGH | New   | N/A |
| Q6QA76                   | PDZ domain-containing protein 11    | 0.00% | 18.60% | 0.00 | 0.50 | HIGH | New I | N/A |
| tr K7GNX1 K7GNX1         | PDZ domain-containing protein 11    | 0.00% | 19.10% | 0.00 | 0.50 | HIGH | New I | N/A |
| tr K7GRD4 K7GRD4         | PDZ domain-containing protein 11    | 0.00% | 21.50% | 0.00 | 0.50 | HIGH | New I | N/A |
| tr K7GSP4 K7GSP4         | PDZ domain-containing protein 11    | 0.00% | 24.30% | 0.00 | 0.50 | HIGH | New I | N/A |
| tr F1SF95 F1SF95         | Peptidyl-prolyl cis-trans isomerase | 0.00% | 15.30% | 0.00 | 0.50 | HIGH | New I | N/A |
| tr I3L6I7 I3L6I7         | Peptidyl-prolyl cis-trans isomerase | 0.00% | 14.40% | 0.00 | 0.50 | HIGH | New I | N/A |
| tr I3LRQ5 I3LRQ5         | Phosphatase and actin regulator     | 0.00% | 5.80%  | 0.00 | 2.00 | HIGH | New   | N/A |
| Q767M0                   | Phostensin                          | 0.00% | 1.95%  | 0.00 | 2.00 | HIGH | Known | 4   |

|                  |                                                                                          |       |        |      |       |      |       |     |
|------------------|------------------------------------------------------------------------------------------|-------|--------|------|-------|------|-------|-----|
| tr A2TEQ2 A2TEQ2 | Poliovirus receptor related 2                                                            | 0.00% | 9.60%  | 0.00 | 4.00  | HIGH | New   | N/A |
| tr B3TFD9 B3TFD9 | Poliovirus receptor-related 2 transcript variant delta                                   | 0.00% | 17.10% | 0.00 | 6.00  | HIGH | New   | N/A |
| tr F1S8H4 F1S8H4 | Probable tRNA N6-adenosine threonylcarbamoyltransferase                                  | 0.00% | 8.30%  | 0.00 | 1.50  | HIGH | New   | N/A |
| tr A3RKG5 A3RKG5 | Progesterone receptor membrane component 2 (PGRMC2)                                      | 0.00% | 8.50%  | 0.00 | 0.50  | HIGH | New I | N/A |
| tr A9LM01 A9LM01 | Progesterone receptor membrane component 2 (PGRMC2)                                      | 0.00% | 15.2%  | 0.00 | 1.00  | HIGH | New I | N/A |
| tr F1RNX2 F1RNX2 | Programmed cell death protein 5                                                          | 0.00% | 8.80%  | 0.00 | 2.00  | HIGH | New#  | 14  |
| Q6JTA8           | Prolactin receptor                                                                       | 0.00% | 3.00%  | 0.00 | 0.50  | HIGH | New   | N/A |
| tr K7GKV2 K7GKV2 | Prolactin receptor (Fragment)                                                            | 0.00% | 3.00%  | 0.00 | 0.50  | HIGH | New   | N/A |
| Q29095           | Prostaglandin-H2 D-isomerase                                                             | 0.00% | 9.50%  | 0.00 | 1.00  | HIGH | New   | N/A |
| tr A5D9J0 A5D9J0 | Proteasome (Prosome, macropain) subunit, beta type, 9 (Large multifunctional protease 2) | 0.00% | 44.00% | 0.00 | 2.50  | HIGH | New   | N/A |
| tr F1RFV5 F1RFV5 | Proteasome subunit beta type                                                             | 0.00% | 16.20% | 0.00 | 2.00  | HIGH | New I | N/A |
| tr Q2PYM7 Q2PYM7 | Proteasome subunit beta type                                                             | 0.00% | 20.10% | 0.00 | 2.50  | HIGH | New I | N/A |
| tr I3LR85 I3LR85 | Protein kinase C delta type                                                              | 0.00% | 1.10%  | 0.00 | 2.50  | HIGH | New   | 43  |
| tr Q00P49 Q00P49 | Protein O-fucosyltransferase 1                                                           | 0.00% | 4.10%  | 0.00 | 0.50  | HIGH | New   | 44  |
| tr A5GFQ9 A5GFQ9 | Protein phosphatase 2, regulatory subunit B (B56), delta isoform                         | 0.00% | 2.00%  | 0.00 | 0.50  | HIGH | New   | N/A |
| tr F1RI78 F1RI78 | Protein tweety homolog                                                                   | 0.00% | 4.20%  | 0.00 | 21.50 | HIGH | New I | N/A |
| tr F1RV50 F1RV50 | Protein tweety homolog                                                                   | 0.00% | 2.73%  | 0.00 | 2.67  | HIGH | New I | N/A |

|                  |                                                                     |       |        |      |       |      |       |     |
|------------------|---------------------------------------------------------------------|-------|--------|------|-------|------|-------|-----|
| Q19AZ8           | Prothrombin                                                         | 0.00% | 2.50%  | 0.00 | 6.00  | HIGH | New I | N/A |
| tr F1SIB1 F1SIB1 | Prothrombin                                                         | 0.00% | 2.50%  | 0.00 | 6.00  | HIGH | New I | N/A |
| Q4LE85           | Ras-related protein Rab-27A                                         | 0.00% | 5.90%  | 0.00 | 1.00  | HIGH | New   | 45  |
| Q06AU5           | Ras-related protein Rab-32                                          | 0.00% | 9.30%  | 0.00 | 1.50  | HIGH | New I | 45  |
| tr F1S747 F1S747 | Ras-related protein Rab-32                                          | 0.00% | 9.30%  | 0.00 | 1.50  | HIGH | New I | 45  |
| Q06AU4           | Ras-related protein Rab-34                                          | 0.00% | 3.85%  | 0.00 | 2.50  | HIGH | New   | N/A |
| Q06AU2           | Ras-related protein Rap-2a                                          | 0.00% | 7.10%  | 0.00 | 16.00 | HIGH | New I | N/A |
| tr F2Z519 F2Z519 | Ras-related protein Rap-2a                                          | 0.00% | 19.50% | 0.00 | 11.50 | HIGH | New I | N/A |
| tr F1S8A4 F1S8A4 | Receptor-type tyrosine-protein phosphatase-A                        | 0.00% | 0.93%  | 0.00 | 3.00  | HIGH | New   | 46  |
| tr F1SDK4 F1SDK4 | Receptor-type tyrosine-protein phosphatase-E                        | 0.00% | 1.53%  | 0.00 | 2.67  | HIGH | Known | 46  |
| tr 3LGE9 I3LGE9  | Receptor-type tyrosine-protein phosphatase-S (PTPRS)                | 0.00% | 3.30%  | 0.00 | 6.00  | HIGH | Known | 46  |
| tr Q06AT8 Q06AT8 | RHOB                                                                | 0.00% | 12.75% | 0.00 | 11.50 | HIGH | New   | 47  |
| tr Q06AT7 Q06AT7 | RHOF                                                                | 0.00% | 15.60% | 0.00 | 1.00  | HIGH | New   | 48  |
| A2BD05           | Serine/threonine-protein kinase Nek6                                | 0.00% | 3.85%  | 0.00 | 2.00  | HIGH | New   | N/A |
| tr F1RRB6 F1RRB6 | Serine/threonine-protein kinase OSR1                                | 0.00% | 13.90% | 0.00 | 1.00  | HIGH | Known | 49  |
| tr I3LCY8 I3LCY8 | Serine/threonine-protein phosphatase 2A 55 kDa regulatory subunit B | 0.00% | 3.20%  | 0.00 | 0.50  | HIGH | New   | N/A |
| Q6PQD5           | Serine-protein kinase ATM                                           | 0.25% | 0.33%  | 0.50 | 1.00  | 2.00 | New I | N/A |

|                  |                                                                        |       |        |      |       |      |       |     |
|------------------|------------------------------------------------------------------------|-------|--------|------|-------|------|-------|-----|
| tr I3L5F1 I3L5F1 | Serine-protein kinase ATM                                              | 0.35% | 0.40%  | 0.50 | 1.00  | 2.00 | New I | N/A |
| tr B3CL06 B3CL06 | Serotransferrin                                                        | 0.00% | 2.50%  | 0.00 | 0.50  | HIGH | New I | N/A |
| P09571           | Serotransferrin                                                        | 0.00% | 2.60%  | 0.00 | 0.50  | HIGH | New I | N/A |
| P15982           | SLA class II histocompatibility antigen, DQ haplotype C beta chain     | 0.00% | 8.80%  | 0.00 | 1.00  | HIGH | New   | N/A |
| P15983           | SLA class II histocompatibility antigen, DQ haplotype D beta chain     | 0.00% | 8.90%  | 0.00 | 1.00  | HIGH | New   | N/A |
| A1XQR9           | Small nuclear ribonucleoprotein E                                      | 0.00% | 17.40% | 0.00 | 1.50  | HIGH | New I | N/A |
| tr I3LDW9 I3LDW9 | Small nuclear ribonucleoprotein E                                      | 0.00% | 17.40% | 0.00 | 1.50  | HIGH | New I | N/A |
| P26429           | Sodium/glucose cotransporter 1                                         | 0.00% | 3.95%  | 0.00 | 11.50 | HIGH | New I | N/A |
| tr F1RLV1 F1RLV1 | Sodium/glucose cotransporter 1                                         | 0.00% | 3.65%  | 0.00 | 11.50 | HIGH | New I | N/A |
| tr F1SB19 F1SB19 | Sodium/glucose cotransporter 5                                         | 0.00% | 4.60%  | 0.00 | 1.50  | HIGH | New   | N/A |
| tr F1STH4 F1STH4 | Sodium/hydrogen exchanger                                              | 0.00% | 0.70%  | 0.00 | 0.33  | HIGH | New   | N/A |
| tr F1RVX0 F1RVX0 | Solute carrier family 16, member 5 (Monocarboxylic acid transporter 6) | 0.00% | 1.70%  | 0.00 | 1.50  | HIGH | New   | N/A |
| P20303           | Solute carrier family 2, facilitated glucose transporter member 1      | 0.00% | 2.65%  | 0.00 | 7.00  | HIGH | New I | N/A |
| tr I3LGB8 I3LGB8 | Solute carrier family 2, facilitated glucose transporter member 1      | 0.00% | 5.80%  | 0.00 | 1.00  | HIGH | New I | N/A |
| tr I3LNT8 I3LNT8 | Solute carrier family 2, facilitated glucose transporter member 2      | 0.00% | 2.40%  | 0.00 | 9.00  | HIGH | New   | N/A |
| Q863T6           | Solute carrier family 22 member 1                                      | 0.00% | 2.20%  | 0.00 | 1.50  | HIGH | New I | N/A |
| tr F1SB78 F1SB78 | Solute carrier family 22 member 1                                      | 0.00% | 2.20%  | 0.00 | 1.50  | HIGH | New I | N/A |



|                  |                                                                      |       |        |      |       |      |         |     |
|------------------|----------------------------------------------------------------------|-------|--------|------|-------|------|---------|-----|
| tr B6V6V4 B6V6V4 | Solute carrier family 30 member 7                                    | 0.00% | 8.20%  | 0.00 | 1.50  | HIGH | New     | N/A |
| tr F1SAI9 F1SAI9 | Solute carrier family 37 (Glucose-6-phosphate transporter), member 4 | 0.00% | 3.60%  | 0.00 | 3.00  | HIGH | New     | N/A |
| Q863Y7           | Solute carrier family 52, riboflavin transporter, member 2           | 0.00% | 13.70% | 0.00 | 9.50  | HIGH | New I   | N/A |
| tr F1RSN6 F1RSN6 | Solute carrier family 52, riboflavin transporter, member 2           | 0.00% | 13.70% | 0.00 | 9.50  | HIGH | New I   | N/A |
| tr K7GT57 K7GT57 | Spliceosome RNA helicase DDX39B                                      | 0.00% | 3.85%  | 0.00 | 15.50 | HIGH | New     | N/A |
| tr F1CNZ4 F1CNZ4 | STEAP family member 4                                                | 0.00% | 2.80%  | 0.00 | 1.00  | HIGH | New     | N/A |
| tr B2DCZ7 B2DCZ7 | Stromal membrane-associated protein 1-like                           | 0.00% | 3.00%  | 0.00 | 1.50  | HIGH | New     | N/A |
| tr F1SH47 F1SH47 | Sucrase-isomaltase, intestinal                                       | 0.00% | 3.10%  | 0.00 | 2.50  | HIGH | New     | N/A |
| tr I3LUD1 I3LUD1 | Superoxide dismutase [Cu-Zn]                                         | 0.00% | 14.80% | 0.00 | 2.50  | HIGH | New     | 50  |
| tr F1STL1 F1STL1 | Syndecan                                                             | 0.00% | 2.60%  | 0.00 | 4.00  | HIGH | New I,* | 51  |
| tr F1SCU4 F1SCU4 | Syndecan (Fragment)                                                  | 0.00% | 2.25%  | 0.00 | 15.50 | HIGH | New I   | N/A |
| tr A5GFS9 A5GFS9 | Syntaxin 16                                                          | 0.00% | 5.90%  | 0.00 | 1.50  | HIGH | New I   | N/A |
| tr A5GFT0 A5GFT0 | Syntaxin 16                                                          | 0.00% | 5.80%  | 0.00 | 1.50  | HIGH | New I   | N/A |
| tr A5GFT1 A5GFT1 | Syntaxin 16                                                          | 0.00% | 5.50%  | 0.00 | 1.50  | HIGH | New I   | N/A |
| tr A5GFT2 A5GFT2 | Syntaxin 16                                                          | 0.00% | 5.60%  | 0.00 | 1.50  | HIGH | New I   | N/A |
| tr F1SMI5 F1SMI5 | Tenascin                                                             | 0.00% | 0.60%  | 0.00 | 0.33  | HIGH | Known I | 52  |
| tr I3LDR6 I3LDR6 | Tenascin                                                             | 0.00% | 0.67%  | 0.00 | 0.33  | HIGH | Known I | 52  |

|                  |                                                                   |       |        |      |       |      |       |     |
|------------------|-------------------------------------------------------------------|-------|--------|------|-------|------|-------|-----|
| tr I3LJU9 I3LJU9 | Tenascin SV=1                                                     | 0.00% | 0.70%  | 0.00 | 0.33  | HIGH | New   | N/A |
| Q06AA5           | Tetraspanin-9                                                     | 0.00% | 13.80% | 0.00 | 5.50  | HIGH | New#  | 53  |
| tr B6Euu6 B6Euu6 | Toll-like receptor 3 short-type                                   | 0.00% | 4.25%  | 0.00 | 9.00  | HIGH | Known | 54  |
| tr D7RK08 D7RK08 | Transferrin receptor protein                                      | 0.00% | 2.70%  | 0.00 | 2.00  | HIGH | New   | N/A |
| Q8HZV3           | Transferrin receptor protein 1 (TfR1)                             | 0.00% | 2.70%  | 0.00 | 2.00  | HIGH | New   | N/A |
| tr F1S025 F1S025 | Transporter                                                       | 0.00% | 1.40%  | 0.00 | 3.50  | HIGH | New   | N/A |
| P50390           | Transthyretin                                                     | 0.00% | 15.30% | 0.00 | 3.00  | HIGH | New   | 55  |
| tr I3LBJ3 I3LBJ3 | tRNA (guanine-N(7)-)-methyltransferase non-catalytic subunit WDR4 | 0.00% | 4.30%  | 0.00 | 0.50  | HIGH | New   | N/A |
| tr F2Z562 F2Z562 | Tubulin gamma chain                                               | 0.00% | 22.20% | 0.00 | 3.50  | HIGH | Known | 56  |
| Q8SQ34           | Tumor necrosis factor receptor superfamily member 5               | 0.00% | 4.85%  | 0.00 | 33.50 | HIGH | New I | N/A |
| tr K7GKQ2 K7GKQ2 | Tumor necrosis factor receptor superfamily member 5               | 0.00% | 5.15%  | 0.00 | 33.50 | HIGH | New I | N/A |
| tr K7GMT2 K7GMT2 | Tumor necrosis factor receptor superfamily member 5               | 0.00% | 16.45% | 0.00 | 31.00 | HIGH | New I | N/A |
| tr K7GQ17 K7GQ17 | Tumor necrosis factor receptor superfamily member 5 (Fragment)    | 0.00% | 46.90% | 0.00 | 0.50  | HIGH | New I | N/A |
| O77736           | Tumor necrosis factor receptor superfamily member 6               | 0.00% | 4.20%  | 0.00 | 1.50  | HIGH | New I | N/A |
| tr F1SCY7 F1SCY7 | Tumor necrosis factor receptor superfamily member 6               | 0.00% | 4.20%  | 0.00 | 1.50  | HIGH | New I | N/A |
| tr J9JIK9 J9JIK9 | Tyrosine-protein kinase                                           | 0.00% | 0.50%  | 0.00 | 3.50  | HIGH | New I | N/A |
| tr K7GMY7 K7GMY7 | Tyrosine-protein kinase                                           | 0.00% | 5.80%  | 0.00 | 3.50  | HIGH | New I | N/A |

|                          |                                                  |       |        |      |      |      |       |     |
|--------------------------|--------------------------------------------------|-------|--------|------|------|------|-------|-----|
| O19064                   | Tyrosine-protein kinase JAK2                     | 0.00% | 0.90%  | 0.00 | 6.00 | HIGH | New I | N/A |
| tr K7GML7 K7GML7         | Tyrosine-protein kinase JAK2                     | 0.00% | 6.00%  | 0.00 | 3.00 | HIGH | New I | N/A |
| tr K7GRY2 K7GRY2         | Tyrosine-protein kinase JAK2 (Fragment)          | 0.00% | 16.20% | 0.00 | 1.50 | HIGH | New I | N/A |
| tr F1RHJ5 F1RHJ5         | Tyrosine-protein kinase receptor                 | 0.00% | 0.75%  | 0.00 | 2.50 | HIGH | New   | N/A |
| Reverse_tr I3LGC6 I3LGC6 | Ubiquitin carboxyl-terminal hydrolase (Fragment) | 0.00% | 0.20%  | 0.00 | 0.33 | HIGH | New   | N/A |
| Q06AA9                   | Ubiquitin-conjugating enzyme E2 D2               | 0.00% | 8.15%  | 0.00 | 5.00 | HIGH | New I | N/A |
| tr F1S105 F1S105         | Ubiquitin-conjugating enzyme E2 D2               | 0.00% | 8.15%  | 0.00 | 5.00 | HIGH | New I | N/A |
| tr I3LUK9 I3LUK9         | Ubiquitin-conjugating enzyme E2 D2               | 0.00% | 10.45% | 0.00 | 5.00 | HIGH | New I | N/A |
| P32307                   | Vasopressin V2 receptor                          | 0.00% | 9.20%  | 0.00 | 3.00 | HIGH | Known | 57  |
| Q29261                   | Villin-1                                         | 0.00% | 1.20%  | 0.00 | 1.00 | HIGH | New I | N/A |
| tr F1SRY3 F1SRY3         | Villin-1                                         | 0.00% | 1.20%  | 0.00 | 1.00 | HIGH | New I | N/A |
| P48819                   | Vitronectin                                      | 0.00% | 1.70%  | 0.00 | 5.00 | HIGH | New I | N/A |
| tr I3L638 I3L638         | Vitronectin                                      | 0.00% | 2.10%  | 0.00 | 5.00 | HIGH | New I | N/A |
| tr I3L998 I3L998         | Vitronectin                                      | 0.00% | 1.70%  | 0.00 | 5.00 | HIGH | New I | N/A |
| tr I3L9F8 I3L9F8         | Vitronectin                                      | 0.00% | 1.70%  | 0.00 | 5.00 | HIGH | New I | N/A |
| tr I3LP50 I3LP50         | Vitronectin                                      | 0.00% | 2.10%  | 0.00 | 5.00 | HIGH | New I | N/A |
| tr F1SMN6 F1SMN6         | V-type proton ATPase subunit F                   | 0.00% | 7.15%  | 0.00 | 4.50 | HIGH | New   | N/A |

|                  |                                |       |       |      |      |      |       |     |
|------------------|--------------------------------|-------|-------|------|------|------|-------|-----|
| Q9TVC1           | V-type proton ATPase subunit H | 0.00% | 2.40% | 0.00 | 7.00 | HIGH | New I | N/A |
| tr F1RSG6 F1RSG6 | V-type proton ATPase subunit H | 0.00% | 2.40% | 0.00 | 7.00 | HIGH | New I | N/A |
| tr I3LQB3 I3LQB3 | V-type proton ATPase subunit H | 0.00% | 2.45% | 0.00 | 7.00 | HIGH | New I | N/A |

**Note:**

**Note:**

I, same proteins with different accession numbers in the Uniport database.

\*, protein known as an exosomal biomarker.

#, known family protein as an exosomal biomarker.

N/A, not available at the time of data analysis.

Total proteins on the table are 324 (= 211 proteins + 113 repeated proteins with different accession numbers). Out of the 211 proteins, there are 172 newly identified proteins and 39 previously confirmed in primary cilia. Out of the 172 newly identified proteins, there are 8 proteins known as exosomal biomarkers and 3 belong to a known exosomal biomarker family.

## Reference

- 1 Ishikawa, H., Thompson, J., Yates, J. R., 3rd & Marshall, W. F. Proteomic analysis of mammalian primary cilia. *Curr Biol* **22**, 414-419, doi:10.1016/j.cub.2012.01.031 (2012).
- 2 Martin-Alonso, J. M., Hernando, N., Ghosh, S. & Coca-Prados, M. Molecular cloning of the bovine CD9 antigen from ocular ciliary epithelial cells. *J Biochem* **112**, 63-67 (1992).
- 3 <https://proteomescout.wustl.edu/proteins/145284/expression>.
- 4 Kohli, P. *et al.* The ciliary membrane-associated proteome reveals actin-binding proteins as key components of cilia. *EMBO Rep* **18**, 1521-1535, doi:10.15252/embr.201643846 (2017).
- 5 Klumpp, S. & Schultz, J. E. Alkaline phosphatase from Paramecium cilia and cell bodies: purification and characterization. *Biochim Biophys Acta* **1037**, 233-239 (1990).
- 6 Moon, P. G. *et al.* Proteomic analysis of urinary exosomes from patients of early IgA nephropathy and thin basement membrane nephropathy. *Proteomics* **11**, 2459-2475, doi:10.1002/pmic.201000443 (2011).
- 7 Forschbach, V. *et al.* Anoctamin 6 is localized in the primary cilium of renal tubular cells and is involved in apoptosis-dependent cyst lumen formation. *Cell Death Dis* **6**, e1899, doi:10.1038/cddis.2015.273 (2015).
- 8 Henkel, B. *et al.* Co-expression of anoctamins in cilia of olfactory sensory neurons. *Chem Senses* **40**, 73-87, doi:10.1093/chemse/bju061 (2015).
- 9 Hu, J. & Barr, M. M. ATP-2 interacts with the PLAT domain of LOV-1 and is involved in Caenorhabditis elegans polycystin signaling. *Mol Biol Cell* **16**, 458-469, doi:10.1091/mbc.E04-09-0851 (2005).
- 10 Yano, J. *et al.* Proteomic analysis of the cilia membrane of Paramecium tetraurelia. *J Proteomics* **78**, 113-122, doi:10.1016/j.jprot.2012.09.040 (2013).
- 11 Xie, Y. F. *et al.* Pulsed electromagnetic fields stimulate osteogenic differentiation and maturation of osteoblasts by upregulating the expression of BMPRII localized at the base of primary cilium. *Bone* **93**, 22-32, doi:10.1016/j.bone.2016.09.008 (2016).
- 12 Wang, S., Wei, Q., Dong, G. & Dong, Z. ERK-mediated suppression of cilia in cisplatin-induced tubular cell apoptosis and acute kidney injury. *Biochim Biophys Acta* **1832**, 1582-1590, doi:10.1016/j.bbadis.2013.05.023 (2013).
- 13 Trinh, L. *et al.* Th1- and Th2-related chemokine and chemokine receptor expression on the ocular surface in endotoxin-induced uveitis. *Mol Vis* **14**, 2428-2434 (2008).
- 14 Sandfeld-Paulsen, B. *et al.* Exosomal proteins as prognostic biomarkers in non-small cell lung cancer. *Mol Oncol* **10**, 1595-1602, doi:10.1016/j.molonc.2016.10.003 (2016).
- 15 Zuo, X., Fogelgren, B. & Lipschutz, J. H. The small GTPase Cdc42 is necessary for primary ciliogenesis in renal tubular epithelial cells. *J Biol Chem* **286**, 22469-22477, doi:10.1074/jbc.M111.238469 (2011).
- 16 Nishiyama, K., Sakaguchi, H., Hu, J. G., Bok, D. & Hollyfield, J. G. Claudin localization in cilia of the retinal pigment epithelium. *Anat Rec* **267**, 196-203, doi:10.1002/ar.10102 (2002).
- 17 Li, J. *et al.* Claudin-containing exosomes in the peripheral circulation of women with ovarian cancer. *BMC Cancer* **9**, 244, doi:10.1186/1471-2407-9-244 (2009).

- 18 Liu, Q. *et al.* The proteome of the mouse photoreceptor sensory cilium complex. *Mol Cell Proteomics* **6**, 1299-1317, doi:10.1074/mcp.M700054-MCP200 (2007).
- 19 Ikeda, H., Ueda, M., Kobayashi, H. & Honda, Y. Localization and activity of membrane dipeptidase in bovine ciliary epithelium. *Invest Ophthalmol Vis Sci* **44**, 37-43 (2003).
- 20 Keller, S. *et al.* Systemic presence and tumor-growth promoting effect of ovarian carcinoma released exosomes. *Cancer Lett* **278**, 73-81, doi:10.1016/j.canlet.2008.12.028 (2009).
- 21 Goggolidou, P. *et al.* ATMIN is a transcriptional regulator of both lung morphogenesis and ciliogenesis. *Development* **141**, 3966-3977, doi:10.1242/dev.107755 (2014).
- 22 Perrone-Capano, C. *et al.* Dystrophin localization and gene expression in the developing nervous system of the chick. *J Neurosci Res* **51**, 109-118, doi:10.1002/(SICI)1097-4547(19980101)51:1<109::AID-JNR12>3.0.CO;2-6 (1998).
- 23 Wang, J., Ma, H. Y., Krishnamoorthy, R. R., Yorio, T. & He, S. A feed-forward regulation of endothelin receptors by c-Jun in human non-pigmented ciliary epithelial cells and retinal ganglion cells. *PLoS One* **12**, e0185390, doi:10.1371/journal.pone.0185390 (2017).
- 24 Jerman, S. *et al.* OFD1 and flotillins are integral components of a ciliary signaling protein complex organized by polycystins in renal epithelia and odontoblasts. *PLoS One* **9**, e106330, doi:10.1371/journal.pone.0106330 (2014).
- 25 Otto, G. P. & Nichols, B. J. The roles of flotillin microdomains--endocytosis and beyond. *J Cell Sci* **124**, 3933-3940, doi:10.1242/jcs.092015 (2011).
- 26 Rondanino, C. *et al.* Galectin-7 modulates the length of the primary cilia and wound repair in polarized kidney epithelial cells. *Am J Physiol Renal Physiol* **301**, F622-633, doi:10.1152/ajprenal.00134.2011 (2011).
- 27 Shichi, H., Mahalak, S. M., Sakamoto, S., Lin, W. L. & Essner, E. S. Immunocytochemical localization of gamma-glutamyl transpeptidase in porcine ciliary epithelium. *Exp Eye Res* **53**, 39-46 (1991).
- 28 Melo, S. A. *et al.* Glypican-1 identifies cancer exosomes and detects early pancreatic cancer. *Nature* **523**, 177-182, doi:10.1038/nature14581 (2015).
- 29 Schou, K. B., Pedersen, L. B. & Christensen, S. T. Ins and outs of GPCR signaling in primary cilia. *EMBO Rep* **16**, 1099-1113, doi:10.15252/embr.201540530 (2015).
- 30 Sakamoto, O. *et al.* Role of macrophage-stimulating protein and its receptor, RON tyrosine kinase, in ciliary motility. *J Clin Invest* **99**, 701-709, doi:10.1172/JCI119214 (1997).
- 31 Pazour, G. J., Agrin, N., Leszyk, J. & Witman, G. B. Proteomic analysis of a eukaryotic cilium. *J Cell Biol* **170**, 103-113, doi:10.1083/jcb.200504008 (2005).
- 32 Feldman, C., Cockeran, R., Jedrzejewski, M. J., Mitchell, T. J. & Anderson, R. Hyaluronidase augments pneumolysin-mediated injury to human ciliated epithelium. *Int J Infect Dis* **11**, 11-15, doi:10.1016/j.ijid.2005.09.002 (2007).
- 33 Bailey, C. C., Zhong, G., Huang, I. C. & Farzan, M. IFITM-Family Proteins: The Cell's First Line of Antiviral Defense. *Annu Rev Virol* **1**, 261-283, doi:10.1146/annurev-virology-031413-085537 (2014).
- 34 Burren, C. P., Berka, J. L. & Batch, J. A. Localization studies of IGFBP-2 and IGFBP-5 in the anterior compartment of the eye. *Curr Eye Res* **16**, 256-262 (1997).
- 35 Praetorius, H. A., Praetorius, J., Nielsen, S., Frokiaer, J. & Spring, K. R. Beta1-integrins in the primary cilium of MDCK cells potentiate fibronectin-induced Ca<sup>2+</sup> signaling. *Am J Physiol Renal Physiol* **287**, F969-978, doi:10.1152/ajprenal.00096.2004 (2004).
- 36 <https://proteomescout.wustl.edu/proteins/118118/expression>.
- 37 Goel, R. *et al.* Characterizing the normal proteome of human ciliary body. *Clin Proteomics* **10**, 9, doi:10.1186/1559-0275-10-9 (2013).

- 38 Casaroli-Marano, R. P. *et al.* Lipoprotein lipase in highly vascularized structures of the eye. *J Lipid Res* **37**, 1037-1044 (1996).
- 39 Nakayama, M. Antigen Presentation by MHC-Dressed Cells. *Front Immunol* **5**, 672, doi:10.3389/fimmu.2014.00672 (2014).
- 40 Helbig, H. *et al.* Induction of MHC class II antigen in cultured bovine ciliary epithelial cells. *Graefes Arch Clin Exp Ophthalmol* **228**, 556-561 (1990).
- 41 Assis, L. H. *et al.* The molecular motor Myosin Va interacts with the cilia-centrosomal protein RPGRIP1L. *Sci Rep* **7**, 43692, doi:10.1038/srep43692 (2017).
- 42 Jackson, C. L. *et al.* Neuronal NOS localises to human airway cilia. *Nitric Oxide* **44**, 3-7, doi:10.1016/j.niox.2014.11.003 (2015).
- 43 Wyatt, T. A. *et al.* Co-exposure to cigarette smoke and alcohol decreases airway epithelial cell cilia beating in a protein kinase C epsilon-dependent manner. *Am J Pathol* **181**, 431-440, doi:10.1016/j.ajpath.2012.04.022 (2012).
- 44 Tsao, P. N. *et al.* Notch signaling controls the balance of ciliated and secretory cell fates in developing airways. *Development* **136**, 2297-2307, doi:10.1242/dev.034884 (2009).
- 45 Bolasco, G. *et al.* Loss of Rab27 function results in abnormal lung epithelium structure in mice. *Am J Physiol Cell Physiol* **300**, C466-476, doi:10.1152/ajpcell.00446.2010 (2011).
- 46 Boucher, C. A. *et al.* Receptor protein tyrosine phosphatases are novel components of a polycystin complex. *Biochim Biophys Acta* **1812**, 1225-1238, doi:10.1016/j.bbadis.2010.11.006 (2011).
- 47 Pan, J., You, Y., Huang, T. & Brody, S. L. RhoA-mediated apical actin enrichment is required for ciliogenesis and promoted by Foxj1. *J Cell Sci* **120**, 1868-1876, doi:10.1242/jcs.005306 (2007).
- 48 Del Debbio, C. B., Santos, M. F., Yan, C. Y., Ahmad, I. & Hamassaki, D. E. Rho GTPases control ciliary epithelium cells proliferation and progenitor profile induction in vivo. *Invest Ophthalmol Vis Sci* **55**, 2631-2641, doi:10.1167/iovs.13-13162 (2014).
- 49 Edelbusch, C. *et al.* Mutation of serine/threonine protein kinase 36 (STK36) causes primary ciliary dyskinesia with a central pair defect. *Hum Mutat* **38**, 964-969, doi:10.1002/humu.23261 (2017).
- 50 Sakai, M. *et al.* Immunocytochemical localization of copper-zinc superoxide dismutase in mouse olfactory mucosa. *Auris Nasus Larynx* **20**, 113-116 (1993).
- 51 Baietti, M. F. *et al.* Syndecan-syntenin-ALIX regulates the biogenesis of exosomes. *Nat Cell Biol* **14**, 677-685, doi:10.1038/ncb2502 (2012).
- 52 Dias da Silva, M. R., Tiffin, N., Mima, T., Mikawa, T. & Hyer, J. FGF-mediated induction of ciliary body tissue in the chick eye. *Dev Biol* **304**, 272-285, doi:10.1016/j.ydbio.2006.12.033 (2007).
- 53 Nazarenko, I. *et al.* Cell surface tetraspanin Tspan8 contributes to molecular pathways of exosome-induced endothelial cell activation. *Cancer Res* **70**, 1668-1678, doi:10.1158/0008-5472.CAN-09-2470 (2010).
- 54 Brito, B. E. *et al.* Toll-like receptor 4 and CD14 expression in human ciliary body and TLR-4 in human iris endothelial cells. *Exp Eye Res* **79**, 203-208, doi:10.1016/j.exer.2004.03.012 (2004).
- 55 Dwork, A. J. *et al.* Distribution of transthyretin in the rat eye. *Invest Ophthalmol Vis Sci* **31**, 489-496 (1990).
- 56 Muresan, V., Joshi, H. C. & Besharse, J. C. Gamma-tubulin in differentiated cell types: localization in the vicinity of basal bodies in retinal photoreceptors and ciliated epithelia. *J Cell Sci* **104** ( Pt 4), 1229-1237 (1993).
- 57 Raychowdhury, M. K. *et al.* Vasopressin receptor-mediated functional signaling pathway in primary cilia of renal epithelial cells. *Am J Physiol Renal Physiol* **296**, F87-97, doi:10.1152/ajprenal.90509.2008 (2009).
