# Supplementary material for: Proteomic Identification Reveals the Role of Ciliary Extracellular‐Like Vesicle in Cardiovascular Function
Source: PubMed Central journal article supplement (PMC7435257; doi:10.1002/advs.201903140), 2020-06-16
Supplement: ADVS-7-1903140-s007.pdf [file ADVS-7-1903140-s007.pdf]

**Table 3. Working heart parameters**

|                              | Scrambled control |            |           | <i>PGRMC2</i> |            |            | <i>F11</i> |            |            |
|------------------------------|-------------------|------------|-----------|---------------|------------|------------|------------|------------|------------|
|                              | control           | adrenalin  | verapamil | control       | adrenalin  | verapamil  | control    | adrenalin  | verapamil  |
| <b>HR<br/>(beat/min)</b>     | 140±12            | 209±19     | 90±9      | 143±12        | 207±19     | 91±9       | 140±12     | 211±20     | 95±9       |
| <b>ESPVR<br/>(mmHg/μL)</b>   | 4.2±0.2           | 11.9±0.7   | 1.4±0.1   | 4.2±0.3       | 14.1±1.4   | 1.9±0.1    | 4.7±0.2    | 15.4±1.4   | 1.9±0.1    |
| <b>EDPVR<br/>(mmHg/μL)</b>   | 0.12±0.01         | 0.13±0.01  | 0.13±0.01 | 0.17±0.02     | 0.20±0.03  | 0.17±0.01  | 0.20±0.02  | 0.10±0.03  | 0.16±0.01  |
| <b>dP/dtmax<br/>(mmHg/s)</b> | 5,667±88          | 17,056±265 | 3,048±911 | 8,288±343     | 17,500±310 | 4,347±1223 | 79,187±131 | 17,478±258 | 4,426±1425 |
| <b>dP/dtmin<br/>(mmHg/s)</b> | -1,574±146        | -3,065±797 | -1,441±36 | -1,886±185    | -4,284±216 | -1,575±101 | -2,178±225 | -2,196±179 | -1,465±138 |
| <b>LV Pmax<br/>(mmHg)</b>    | 52.5±0.8          | 85.3±1.3   | 33.9±1.0  | 76.7±3.2      | 87.5±1.6   | 48.3±1.4   | 73.31±1.21 | 87.39±1.3  | 49.2±1.6   |
| <b>LV ESP<br/>(mmHg)</b>     | 39.3±0.6          | 64.0±1.0   | 25.4±0.8  | 57.6±2.4      | 65.6±1.2   | 36.2±1.0   | 54.9±0.9   | 65.5±0.97  | 36.88±1.19 |
| <b>LV EDP<br/>(mmHg)</b>     | 4.9±0.4           | 5.1±0.3    | 5.3±0.7   | 5.8±0.6       | 7.1±1.1    | 5.8±0.2    | 6.7±0.7    | 3.7±0.9    | 5.4±0.3    |
| <b>LV ESV<br/>(μL)</b>       | 12.6±0.3          | 7.3±0.5    | 25.3±1.0  | 18.6±0.9      | 6.4±0.7    | 24.8±0.5   | 15.8±0.9   | 5.8±0.5    | 24.8±0.6   |
| <b>LV EDV<br/>(μL)</b>       | 39.5±0.5          | 40.0±0.1   | 40.2±0.3  | 34.9±0.8      | 35.7±0.5   | 33.7±0.5   | 33.2±0.6   | 34.7±0.6   | 33.7±0.5   |
| <b>SV<br/>(μL)</b>           | 26.9±0.7          | 32.7±0.5   | 15.0±1.2  | 16.4±0.5      | 29.3±0.8   | 8.9±0.7    | 16.9±0.8   | 28.9±0.9   | 8.9±0.9    |
| <b>SW<br/>(mmHg·μL)</b>      | 1,281±45          | 2,618±35   | 427±37    | 1,167±74      | 2,348±60   | 379±28     | 1,161±103  | 2,421±109  | 392±45     |
| <b>EF<br/>(%)</b>            | 68.1±1.1          | 81.8±1.2   | 37.1±2.8  | 47.0±1.8      | 82.0±2.0   | 26.5±1.8   | 50.3±3.0   | 83.2±1.6   | 26.5±2.4   |
| <b>CO<br/>(μL/min)</b>       | 3,736±113         | 5,874±80   | 1,346±20  | 2,349±62      | 6,062±149  | 806.1±60   | 2,428±154  | 6,096±183  | 806±80     |

HR, heart rate; ESPVR and EDPVR, end-systolic and end-diastolic pressure volume relation, respectively; dP/dtmax and dP/dtmin, maximum rate of left ventricle (LV) pressure rise and fall, respectively; Pmax, systolic pressure; ESP, end-systolic pressure; EDP, end-diastolic pressure; ESV, end-systolic volume; EDV, end-diastolic volume; SV, stroke volume; SW, stroke work; EF, ejection fraction; CO, cardiac output.
