# Supplementary material for: Proteomic Identification Reveals the Role of Ciliary Extracellular‐Like Vesicle in Cardiovascular Function
Source: Adv Sci (Weinh). 2020 Jun 16;7(16):1903140. doi: 10.1002/advs.201903140 (PMC7435257; doi:10.1002/advs.201903140)
Supplement: Supplementary file 5 — Supplemental Table 1 [file ADVS-7-1903140-s005.pdf]

| Sample#                  | Peptide Count |            |            |                |                |                |                | Spectral Count |            |            |                |                |                |                | Sequence Coverage |            |            |                |                |                |                |       |       |       |
|--------------------------|---------------|------------|------------|----------------|----------------|----------------|----------------|----------------|------------|------------|----------------|----------------|----------------|----------------|-------------------|------------|------------|----------------|----------------|----------------|----------------|-------|-------|-------|
|                          | Whole Cell    | Whole Cell | Whole Cell | Cilia Fraction | Cilia Fraction | Cilia Fraction | Cilia Fraction | Whole Cell     | Whole Cell | Whole Cell | Cilia Fraction | Cilia Fraction | Cilia Fraction | Cilia Fraction | Whole Cell        | Whole Cell | Whole Cell | Cilia Fraction | Cilia Fraction | Cilia Fraction | Cilia Fraction |       |       |       |
|                          | 1             | 2          | 6          | 4              | 3              | 5              | 7              | 8              | 1          | 2          | 6              | 4              | 3              | 5              | 7                 | 8          | 1          | 2              | 6              | 4              | 3              | 5     | 7     | 8     |
| Accession                |               |            |            |                |                |                |                |                |            |            |                |                |                |                |                   |            |            |                |                |                |                |       |       |       |
| tr F1STN0 F1STN0         | 0             | 0          | 0          | 1              | 1              | 1              | 4              | 5              | 0          | 0          | 0              | 12             | 6              | 1              | 27                | 41         | 0.0%       | 0.0%           | 0.0%           | 2.6%           | 2.6%           | 2.6%  | 12.3% | 16.7% |
| tr F1SMI8 F1SMI8         | 0             | 0          | 0          | 1              | 5              | 0              | 0              | 0              | 0          | 0          | 0              | 2              | 11             | 0              | 0                 | 0          | 0.0%       | 0.0%           | 0.0%           | 1.3%           | 5.7%           | 0.0%  | 0.0%  | 0.0%  |
| Q9TUQ3                   | 0             | 0          | 0          | 1              | 4              | 0              | 2              | 4              | 0          | 0          | 0              | 2              | 10             | 0              | 8                 | 77         | 0.0%       | 0.0%           | 0.0%           | 1.2%           | 4.6%           | 0.0%  | 3.9%  | 3.6%  |
| tr F1RW52 F1RW52         | 0             | 0          | 1          | 2              | 1              | 0              | 4              | 4              | 0          | 0          | 7              | 6              | 3              | 0              | 7                 | 16         | 0.0%       | 0.0%           | 3.5%           | 3.7%           | 1.8%           | 0.0%  | 8.7%  | 10.4% |
| Q8MIB3                   | 0             | 0          | 1          | 2              | 1              | 0              | 4              | 4              | 0          | 0          | 7              | 6              | 3              | 0              | 7                 | 16         | 0.0%       | 0.0%           | 3.5%           | 3.7%           | 1.8%           | 0.0%  | 8.7%  | 10.4% |
| tr K7GKB4 K7GKB4         | 0             | 0          | 1          | 2              | 1              | 0              | 2              | 2              | 0          | 0          | 7              | 6              | 3              | 0              | 2                 | 12         | 0.0%       | 0.0%           | 5.4%           | 5.6%           | 2.8%           | 0.0%  | 6.6%  | 7.7%  |
| tr F1SMJ1 F1SMJ1         | 0             | 0          | 0          | 1              | 2              | 0              | 1              | 1              | 0          | 0          | 0              | 2              | 7              | 0              | 1                 | 70         | 0.0%       | 0.0%           | 0.0%           | 1.2%           | 2.3%           | 0.0%  | 1.5%  | 1.1%  |
| tr K7GQU9 K7GQU9         | 0             | 0          | 0          | 0              | 1              | 1              | 0              | 1              | 0          | 0          | 0              | 0              | 8              | 1              | 0                 | 38         | 0.0%       | 0.0%           | 0.0%           | 0.0%           | 14.1%          | 14.1% | 0.0%  | 14.1% |
| tr F1S8A4 F1S8A4         | 0             | 0          | 0          | 1              | 1              | 0              | 0              | 1              | 0          | 0          | 0              | 8              | 1              | 0              | 0                 | 12         | 0.0%       | 0.0%           | 0.0%           | 1.4%           | 1.4%           | 0.0%  | 0.0%  | 3.3%  |
| tr F1RW50 F1RW50         | 0             | 0          | 1          | 1              | 1              | 0              | 0              | 1              | 0          | 0          | 7              | 5              | 3              | 0              | 0                 | 11         | 0.0%       | 0.0%           | 8.4%           | 4.4%           | 4.4%           | 0.0%  | 0.0%  | 8.4%  |
| tr F1RV50 F1RV50         | 0             | 0          | 0          | 2              | 1              | 0              | 0              | 1              | 0          | 0          | 0              | 6              | 2              | 0              | 0                 | 6          | 0.0%       | 0.0%           | 0.0%           | 4.1%           | 4.1%           | 0.0%  | 0.0%  | 2.1%  |
| tr F1SDK4 F1SDK4         | 0             | 0          | 0          | 1              | 2              | 0              | 0              | 0              | 0          | 0          | 0              | 3              | 5              | 0              | 0                 | 0          | 0.0%       | 0.0%           | 0.0%           | 2.3%           | 2.3%           | 0.0%  | 0.0%  | 0.0%  |
| tr F1SD6D F1SD6D         | 0             | 0          | 1          | 3              | 2              | 1              | 2              | 5              | 0          | 0          | 1              | 4              | 3              | 1              | 3                 | 29         | 0.0%       | 0.0%           | 1.9%           | 6.5%           | 5.1%           | 1.9%  | 4.4%  | 12.6% |
| tr K7GN83 K7GN83         | 0             | 0          | 1          | 1              | 3              | 1              | 4              | 16             | 0          | 0          | 6              | 1              | 5              | 1              | 12                | 86         | 0.0%       | 0.0%           | 4.0%           | 3.4%           | 14.6%          | 4.0%  | 18.0% | 37.2% |
| tr F1SD0 F1SD0           | 0             | 0          | 1          | 1              | 3              | 1              | 3              | 15             | 0          | 0          | 6              | 1              | 5              | 1              | 11                | 84         | 0.0%       | 0.0%           | 5.1%           | 4.3%           | 18.5%          | 5.1%  | 16.9% | 41.3% |
| tr K7GKB6 K7GKB6         | 0             | 0          | 1          | 1              | 3              | 1              | 3              | 15             | 0          | 0          | 6              | 1              | 5              | 1              | 11                | 84         | 0.0%       | 0.0%           | 4.8%           | 4.1%           | 17.5%          | 4.8%  | 16.0% | 39.0% |
| tr I3L8B9 I3L8B9         | 0             | 0          | 1          | 1              | 3              | 1              | 3              | 13             | 0          | 0          | 6              | 1              | 5              | 1              | 11                | 70         | 0.0%       | 0.0%           | 5.0%           | 4.2%           | 18.1%          | 5.0%  | 16.6% | 36.7% |
| tr I3LSX8 I3LSX8         | 0             | 0          | 3          | 1              | 1              | 0              | 3              | 8              | 0          | 0          | 9              | 3              | 4              | 0              | 22                | 46         | 0.0%       | 0.0%           | 4.8%           | 2.6%           | 2.6%           | 0.0%  | 8.3%  | 16.8% |
| tr I3LF11 I3LF11         | 0             | 0          | 1          | 1              | 0              | 0              | 0              | 0              | 0          | 0          | 3              | 7              | 0              | 0              | 0                 | 0          | 0.0%       | 0.0%           | 15.2%          | 11.4%          | 0.0%           | 0.0%  | 0.0%  | 0.0%  |
| tr F1SNC8 F1SNC8         | 0             | 0          | 0          | 1              | 3              | 2              | 0              | 1              | 0          | 0          | 0              | 1              | 4              | 2              | 0                 | 4          | 0.0%       | 0.0%           | 0.0%           | 3.6%           | 12.3%          | 12.7% | 0.0%  | 2.4%  |
| tr I3LSC5 I3LSC5         | 0             | 0          | 0          | 1              | 3              | 0              | 1              | 5              | 0          | 0          | 0              | 2              | 4              | 0              | 1                 | 28         | 0.0%       | 0.0%           | 0.0%           | 4.1%           | 9.1%           | 0.0%  | 4.9%  | 14.6% |
| tr F1SME1 F1SME1         | 0             | 0          | 0          | 1              | 1              | 0              | 0              | 1              | 0          | 0          | 0              | 2              | 4              | 0              | 0                 | 1          | 0.0%       | 0.0%           | 0.0%           | 0.4%           | 0.4%           | 0.0%  | 0.0%  | 0.4%  |
| tr I3L9E5 I3L9E5         | 0             | 0          | 2          | 1              | 2              | 1              | 1              | 5              | 0          | 0          | 10             | 2              | 2              | 1              | 65                | 14         | 0.0%       | 0.0%           | 6.3%           | 2.5%           | 5.4%           | 2.5%  | 12.3% | 12.3% |
| tr F1RH87 F1RH87         | 0             | 0          | 2          | 1              | 2              | 1              | 1              | 5              | 0          | 0          | 10             | 2              | 2              | 1              | 65                | 14         | 0.0%       | 0.0%           | 6.3%           | 2.5%           | 5.4%           | 2.5%  | 12.3% | 12.3% |
| tr I3LB86 I3LB86         | 0             | 0          | 0          | 2              | 2              | 0              | 4              | 8              | 0          | 0          | 0              | 3              | 2              | 0              | 19                | 140        | 0.0%       | 0.0%           | 0.0%           | 3.8%           | 10.5%          | 0.0%  | 12.9% | 17.7% |
| tr F1SRD0 F1SRD0         | 0             | 0          | 0          | 0              | 2              | 1              | 2              | 5              | 0          | 0          | 0              | 0              | 4              | 1              | 18                | 46         | 0.0%       | 0.0%           | 0.0%           | 0.0%           | 3.8%           | 1.4%  | 5.4%  | 9.3%  |
| tr F1SRC9 F1SRC9         | 0             | 0          | 0          | 0              | 2              | 1              | 0              | 3              | 0          | 0          | 0              | 0              | 4              | 1              | 0                 | 9          | 0.0%       | 0.0%           | 0.0%           | 0.0%           | 9.6%           | 3.6%  | 0.0%  | 12.0% |
| tr F1SDL2 F1SDL2         | 0             | 0          | 0          | 1              | 1              | 0              | 1              | 1              | 0          | 0          | 0              | 4              | 1              | 0              | 2                 | 1          | 0.0%       | 0.0%           | 0.0%           | 1.5%           | 1.5%           | 0.0%  | 1.5%  | 1.9%  |
| tr F1RGC5 F1RGC5         | 0             | 0          | 0          | 1              | 2              | 0              | 1              | 1              | 0          | 0          | 0              | 3              | 2              | 0              | 1                 | 1          | 0.0%       | 0.0%           | 0.0%           | 11.2%          | 25.2%          | 0.0%  | 11.2% | 16.8% |
| tr I3LGC0 I3LGC0         | 0             | 0          | 0          | 1              | 1              | 0              | 0              | 1              | 0          | 0          | 0              | 1              | 4              | 0              | 0                 | 1          | 0.0%       | 0.0%           | 0.0%           | 4.7%           | 4.7%           | 0.0%  | 0.0%  | 3.8%  |
| tr I3L6U7 I3L6U7         | 0             | 0          | 0          | 0              | 0              | 1              | 0              | 0              | 0          | 0          | 0              | 0              | 0              | 5              | 0                 | 0          | 0.0%       | 0.0%           | 0.0%           | 0.0%           | 0.0%           | 2.8%  | 0.0%  | 0.0%  |
| tr F1SLU8 F1SLU8         | 0             | 0          | 0          | 1              | 1              | 0              | 0              | 0              | 0          | 0          | 0              | 3              | 2              | 0              | 0                 | 0          | 0.0%       | 0.0%           | 0.0%           | 2.9%           | 2.9%           | 0.0%  | 0.0%  | 0.0%  |
| tr F1SET6 F1SET6         | 0             | 0          | 0          | 1              | 1              | 0              | 0              | 0              | 0          | 0          | 0              | 3              | 2              | 0              | 0                 | 0          | 0.0%       | 0.0%           | 0.0%           | 3.3%           | 3.3%           | 0.0%  | 0.0%  | 0.0%  |
| tr I3L855 I3L855         | 0             | 0          | 0          | 1              | 0              | 2              | 0              | 1              | 0          | 0          | 0              | 2              | 0              | 2              | 0                 | 1          | 0.0%       | 0.0%           | 0.0%           | 4.6%           | 0.0%           | 4.6%  | 0.0%  | 5.1%  |
| tr Q2EN89 Q2EN89         | 0             | 0          | 0          | 0              | 0              | 3              | 0              | 0              | 0          | 0          | 0              | 0              | 0              | 4              | 0                 | 0          | 0.0%       | 0.0%           | 0.0%           | 0.0%           | 0.0%           | 13.2% | 0.0%  | 0.0%  |
| tr F1SHV9 F1SHV9         | 0             | 0          | 0          | 0              | 2              | 0              | 0              | 0              | 0          | 0          | 0              | 0              | 4              | 0              | 0                 | 0          | 0.0%       | 0.0%           | 0.0%           | 0.0%           | 5.6%           | 0.0%  | 0.0%  | 0.0%  |
| tr F1RXG2 F1RXG2         | 0             | 0          | 0          | 1              | 1              | 0              | 0              | 0              | 0          | 0          | 0              | 2              | 2              | 0              | 0                 | 0          | 0.0%       | 0.0%           | 0.0%           | 1.9%           | 1.5%           | 0.0%  | 0.0%  | 0.0%  |
| Q29288                   | 0             | 0          | 0          | 0              | 0              | 3              | 0              | 0              | 0          | 0          | 0              | 0              | 0              | 4              | 0                 | 0          | 0.0%       | 0.0%           | 0.0%           | 0.0%           | 0.0%           | 24.0% | 0.0%  | 0.0%  |
| tr K7GLL8 K7GLL8         | 0             | 0          | 0          | 0              | 0              | 3              | 0              | 0              | 0          | 0          | 0              | 0              | 0              | 4              | 0                 | 0          | 0.0%       | 0.0%           | 0.0%           | 0.0%           | 0.0%           | 14.6% | 0.0%  | 0.0%  |
| tr I3L5K9 I3L5K9         | 0             | 0          | 0          | 1              | 1              | 0              | 0              | 0              | 0          | 0          | 0              | 1              | 3              | 0              | 0                 | 0          | 0.0%       | 0.0%           | 0.0%           | 12.0%          | 12.0%          | 0.0%  | 0.0%  | 0.0%  |
| tr I3LBX8 I3LBX8         | 0             | 0          | 2          | 1              | 1              | 0              | 2              | 3              | 0          | 0          | 8              | 2              | 1              | 0              | 45                | 24         | 0.0%       | 0.0%           | 6.2%           | 2.4%           | 2.4%           | 0.0%  | 14.8% | 15.1% |
| tr I3L8I4 I3L8I4         | 0             | 0          | 2          | 1              | 1              | 0              | 2              | 3              | 0          | 0          | 8              | 2              | 1              | 0              | 45                | 24         | 0.0%       | 0.0%           | 5.3%           | 2.1%           | 2.1%           | 0.0%  | 12.7% | 12.9% |
| tr F1SNF3 F1SNF3         | 0             | 0          | 2          | 1              | 1              | 0              | 2              | 3              | 0          | 0          | 8              | 2              | 1              | 0              | 45                | 24         | 0.0%       | 0.0%           | 5.8%           | 2.2%           | 2.2%           | 0.0%  | 13.9% | 14.2% |
| Q29261                   | 0             | 0          | 5          | 0              | 3              | 0              | 9              | 10             | 0          | 0          | 37             | 0              | 3              | 0              | 39                | 44         | 0.0%       | 0.0%           | 8.0%           | 0.0%           | 3.6%           | 0.0%  | 15.6% | 21.6% |
| P00371                   | 0             | 0          | 2          | 1              | 1              | 0              | 0              | 0              | 0          | 0          | 5              | 1              | 2              | 0              | 0                 | 0          | 0.0%       | 0.0%           | 7.5%           | 3.7%           | 3.7%           | 0.0%  | 0.0%  | 0.0%  |
| tr F1SRY3 F1SRY3         | 0             | 0          | 6          | 0              | 3              | 0              | 10             | 10             | 0          | 0          | 170            | 0              | 3              | 0              | 40                | 44         | 0.0%       | 0.0%           | 10.3%          | 0.0%           | 3.6%           | 0.0%  | 17.2% | 21.6% |
| Q06AU2                   | 0             | 0          | 0          | 1              | 1              | 0              | 1              | 7              | 0          | 0          | 0              | 1              | 2              | 0              | 8                 | 24         | 0.0%       | 0.0%           | 0.0%           | 8.2%           | 8.2%           | 0.0%  | 14.2% | 41.0% |
| tr F1SJM5 F1SJM5         | 0             | 0          | 0          | 1              | 1              | 0              | 1              | 3              | 0          | 0          | 0              | 1              | 2              | 0              | 8                 | 8          | 0.0%       | 0.0%           | 0.0%           | 8.2%           | 8.2%           | 0.0%  | 14.3% | 14.8% |
| tr F1SAY0 F1SAY0         | 0             | 0          | 0          | 1              | 1              | 0              | 0              | 2              | 0          | 0          | 0              | 2              | 1              | 0              | 0                 | 2          | 0.0%       | 0.0%           | 0.0%           | 0.9%           | 0.9%           | 0.0%  | 0.0%  | 3.9%  |
| Reverse_tr I3LCD2 I3LCD2 | 0             | 0          | 0          | 0              | 1              | 0              | 0              | 0              | 0          | 0          | 0              | 0              | 3              | 0              | 0                 | 0          | 0.0%       | 0.0%           | 0.0%           | 0.0%           | 2.8%           | 0.0%  | 0.0%  | 0.0%  |
| tr Q8MHU0 Q8MHU0         | 0             | 0          | 0          | 1              | 1              | 0              | 0              | 0              | 0          | 0          | 0              | 1              | 2              | 0              | 0                 | 0          | 0.0%       | 0.0%           | 0.0%           | 3.5%           | 3.5%           | 0.0%  | 0.0%  | 0.0%  |
| tr K7GNT1 K7GNT1         | 0             | 0          | 0          | 0              | 1              | 0              | 0              | 0              | 0          | 0          | 0              | 0              | 3              | 0              | 0                 | 0          | 0.0%       | 0.0%           | 0.0%           | 0.0%           | 8.8%           | 0.0%  | 0.0%  | 0.0%  |
| tr F1RPE6 F1RPE6         | 0             | 0          | 0          | 0              | 1              | 0              | 0              | 0              | 0          | 0          | 0              | 0              | 3              | 0              | 0                 | 0          | 0.0%       | 0.0%           | 0.0%           | 0.0%           | 2.8%           | 0.0%  | 0.0%  | 0.0%  |
| tr F1RZ55 F1RZ55         | 0             | 0          | 0          | 1              | 1              | 0              | 0              | 0              | 0          | 0          | 0              | 1              | 2              | 0              | 0                 | 0          | 0.0%       | 0.0%           | 0.0%           | 6.5%           | 6.5%           | 0.0%  | 0.0%  | 0.0%  |
| tr F1RQU1 F1RQU1         | 0             | 0          | 0          | 1              | 1              | 0              | 0              | 0              | 0          | 0          | 0              | 2              | 1              | 0              | 0                 | 0          | 0.0%       | 0.0%           | 0.0%           | 4.5%           | 4.5%           | 0.0%  | 0.0%  | 0.0%  |
| tr F1CNZ4 F1CNZ4         | 0             | 0          | 0          | 1              | 1              | 1              | 0              | 0              | 0          | 0          | 0              | 1              | 1              | 1              | 0                 | 0          | 0.0%       | 0.0%           | 0.0%           | 2.8%           | 2.8%           | 0.0%  | 0.0%  | 0.0%  |
| tr I3LJ52 I3LJ52         | 0             | 0          | 0          | 0              | 2              | 0              | 0              | 0              | 0          | 0          | 0              | 0              | 3              | 0              | 0                 | 0          | 0.0%       | 0.0%           | 0.0%           | 0.0%           | 5.7%           | 0.0%  | 0.0%  | 0.0%  |
| tr F1RTG7 F1RTG7         | 0             | 0          | 0          | 1              | 1              | 0              | 0              | 0              | 0          | 0          | 0              | 1              | 2              | 0              | 0                 | 0          | 0.0%       | 0.0%           | 0.0%           | 6.1%           | 6.1%           | 0.0%  | 0.0%  | 0.0%  |
| tr I3LLJ2 I3LLJ2         | 0             | 0          | 0          | 0              | 1              | 0              | 0              | 0              | 0          | 0          | 0              | 0              | 3              | 0              | 0                 | 0          | 0.0%       | 0.0%           | 0.0%           | 0.0%           | 4.6%           | 0.0%  | 0.0%  | 0.0%  |
| P12069                   | 0             | 0          | 0          | 0              | 1              | 0              | 0              | 0              | 0          | 0          | 0              | 0              | 3              | 0              | 0                 | 0          | 0.0%       | 0.0%           | 0.0%           | 0.0%           | 8.1%           | 0.0%  | 0.0%  | 0.0%  |
| P12068                   | 0             | 0          | 0          | 0              | 1              | 0              | 0              | 0              | 0          | 0          | 0              | 0              | 3              | 0              | 0                 | 0          | 0.0%       | 0.0%           | 0.0%           | 0.0%           | 8.2%           | 0.0%  | 0.0%  | 0.0%  |
| P12067                   | 0             | 0          | 0          | 0              | 1              | 0              | 0              | 0              | 0          | 0          | 0              | 0              | 3              | 0              | 0                 | 0          | 0.0%       | 0.0%           | 0.0%           | 0.0%           | 9.4%           | 0.0%  | 0.0%  | 0.0%  |
| tr F1SDI6 F1SDI6         | 0             | 0          | 0          | 1              | 1              | 0              | 0              | 0              | 0          | 0          | 0              | 2              | 1              | 0              | 0                 | 0          | 0.0%       | 0.0%           | 0.0%           | 2.9%           | 2.9%           | 0.0%  | 0.0%  | 0.0%  |
| tr I3L7K6 I3L7K6         | 0             | 0          | 0          | 0              | 2              | 1              | 0              |                |            |            |                |                |                |                |                   |            |            |                |                |                |                |       |       |       |

| Sample#                  | Peptide Count |            |            |                |                |                |                |    | Spectral Count |            |            |                |                |                |                |    | Sequence Coverage |            |            |                |                |                |                |                |
|--------------------------|---------------|------------|------------|----------------|----------------|----------------|----------------|----|----------------|------------|------------|----------------|----------------|----------------|----------------|----|-------------------|------------|------------|----------------|----------------|----------------|----------------|----------------|
|                          | Whole Cell    | Whole Cell | Whole Cell | Cilia Fraction | Cilia Fraction | Cilia Fraction | Cilia Fraction |    | Whole Cell     | Whole Cell | Whole Cell | Cilia Fraction | Cilia Fraction | Cilia Fraction | Cilia Fraction |    | Whole Cell        | Whole Cell | Whole Cell | Cilia Fraction |
|                          | 1             | 2          | 6          | 4              | 3              | 5              | 7              | 8  | 1              | 2          | 6          | 4              | 3              | 5              | 7              | 8  | 1                 | 2          | 6          | 4              | 3              | 5              | 7              | 8              |
| Accession                |               |            |            |                |                |                |                |    |                |            |            |                |                |                |                |    |                   |            |            |                |                |                |                |                |
| tr F1SPK3 F1SPK3         | 0             | 0          | 0          | 0              | 1              | 1              | 0              | 1  | 0              | 0          | 0          | 0              | 1              | 1              | 0              | 1  | 0.0%              | 0.0%       | 0.0%       | 0.0%           | 4.1%           | 4.1%           | 0.0%           | 4.1%           |
| tr F1SPA8 F1SPA8         | 0             | 0          | 0          | 1              | 0              | 0              | 0              | 0  | 0              | 0          | 0          | 2              | 0              | 0              | 0              | 0  | 0.0%              | 0.0%       | 0.0%       | 7.1%           | 0.0%           | 0.0%           | 0.0%           |                |
| tr F1SOK4 F1SOK4         | 0             | 0          | 0          | 0              | 1              | 0              | 0              | 0  | 0              | 0          | 0          | 0              | 2              | 0              | 0              | 0  | 0.0%              | 0.0%       | 0.0%       | 0.0%           | 1.7%           | 0.0%           | 0.0%           |                |
| tr F1RL47 F1RL47         | 0             | 0          | 0          | 0              | 1              | 1              | 0              | 0  | 0              | 0          | 0          | 0              | 1              | 1              | 0              | 0  | 0.0%              | 0.0%       | 0.0%       | 0.0%           | 3.7%           | 3.7%           | 0.0%           |                |
| Reverse_tr I3LL04 I3LL04 | 0             | 0          | 0          | 1              | 0              | 0              | 0              | 0  | 0              | 0          | 0          | 2              | 0              | 0              | 0              | 0  | 0.0%              | 0.0%       | 0.0%       | 1.9%           | 0.0%           | 0.0%           | 0.0%           |                |
| tr F1SOK7 F1SOK7         | 0             | 0          | 0          | 0              | 1              | 0              | 0              | 0  | 0              | 0          | 0          | 0              | 2              | 0              | 0              | 0  | 0.0%              | 0.0%       | 0.0%       | 0.0%           | 1.5%           | 0.0%           | 0.0%           |                |
| tr F1SAK2 F1SAK2         | 0             | 0          | 0          | 1              | 0              | 0              | 0              | 0  | 0              | 0          | 0          | 2              | 0              | 0              | 0              | 0  | 0.0%              | 0.0%       | 0.0%       | 0.4%           | 0.0%           | 0.0%           | 0.0%           |                |
| tr F1RGF2 F1RGF2         | 0             | 0          | 0          | 1              | 1              | 0              | 0              | 0  | 0              | 0          | 0          | 1              | 1              | 0              | 0              | 0  | 0.0%              | 0.0%       | 0.0%       | 9.7%           | 9.7%           | 0.0%           | 0.0%           |                |
| tr K7GRK0 K7GRK0         | 0             | 0          | 0          | 1              | 0              | 0              | 0              | 0  | 0              | 0          | 0          | 2              | 0              | 0              | 0              | 0  | 0.0%              | 0.0%       | 0.0%       | 7.1%           | 0.0%           | 0.0%           | 0.0%           |                |
| tr F1SRR8 F1SRR8         | 0             | 0          | 0          | 1              | 1              | 0              | 0              | 0  | 0              | 0          | 0          | 1              | 1              | 0              | 0              | 0  | 0.0%              | 0.0%       | 0.0%       | 0.7%           | 0.7%           | 0.0%           | 0.0%           |                |
| tr F1SPK1 F1SPK1         | 0             | 0          | 0          | 1              | 1              | 0              | 0              | 0  | 0              | 0          | 0          | 1              | 1              | 0              | 0              | 0  | 0.0%              | 0.0%       | 0.0%       | 0.9%           | 0.4%           | 0.0%           | 0.0%           |                |
| tr F1SQ40 F1SQ40         | 0             | 0          | 0          | 1              | 1              | 0              | 0              | 0  | 0              | 0          | 0          | 1              | 1              | 0              | 0              | 0  | 0.0%              | 0.0%       | 0.0%       | 3.8%           | 3.8%           | 0.0%           | 0.0%           |                |
| tr F1SOK8 F1SOK8         | 0             | 0          | 0          | 0              | 1              | 0              | 0              | 0  | 0              | 0          | 0          | 0              | 2              | 0              | 0              | 0  | 0.0%              | 0.0%       | 0.0%       | 0.0%           | 2.1%           | 0.0%           | 0.0%           |                |
| tr F1SC07 F1SC07         | 0             | 0          | 0          | 1              | 0              | 0              | 0              | 0  | 0              | 0          | 0          | 2              | 0              | 0              | 0              | 0  | 0.0%              | 0.0%       | 0.0%       | 0.2%           | 0.0%           | 0.0%           | 0.0%           |                |
| tr I3LK92 I3LK92         | 0             | 0          | 0          | 1              | 1              | 0              | 0              | 0  | 0              | 0          | 0          | 1              | 1              | 0              | 0              | 0  | 0.0%              | 0.0%       | 0.0%       | 12.1%          | 12.1%          | 0.0%           | 0.0%           |                |
| tr F1S8V8 F1S8V8         | 0             | 0          | 0          | 1              | 0              | 0              | 0              | 0  | 0              | 0          | 0          | 2              | 0              | 0              | 0              | 0  | 0.0%              | 0.0%       | 0.0%       | 0.8%           | 0.0%           | 0.0%           | 0.0%           |                |
| tr F1RXF9 F1RXF9         | 0             | 0          | 0          | 1              | 0              | 0              | 0              | 0  | 0              | 0          | 0          | 2              | 0              | 0              | 0              | 0  | 0.0%              | 0.0%       | 0.0%       | 2.0%           | 0.0%           | 0.0%           | 0.0%           |                |
| tr F1RXG1 F1RXG1         | 0             | 0          | 0          | 1              | 0              | 0              | 0              | 0  | 0              | 0          | 0          | 2              | 0              | 0              | 0              | 0  | 0.0%              | 0.0%       | 0.0%       | 2.0%           | 0.0%           | 0.0%           | 0.0%           |                |
| tr I3LUM7 I3LUM7         | 0             | 0          | 0          | 0              | 1              | 0              | 0              | 0  | 0              | 0          | 0          | 0              | 2              | 0              | 0              | 0  | 0.0%              | 0.0%       | 0.0%       | 0.0%           | 1.7%           | 0.0%           | 0.0%           |                |
| tr F1RMH5 F1RMH5         | 0             | 0          | 0          | 1              | 0              | 0              | 0              | 0  | 0              | 0          | 0          | 2              | 0              | 0              | 0              | 0  | 0.0%              | 0.0%       | 0.0%       | 1.9%           | 0.0%           | 0.0%           | 0.0%           |                |
| tr K7GLK4 K7GLK4         | 0             | 0          | 0          | 1              | 0              | 0              | 0              | 0  | 0              | 0          | 0          | 2              | 0              | 0              | 0              | 0  | 0.0%              | 0.0%       | 0.0%       | 8.6%           | 0.0%           | 0.0%           | 0.0%           |                |
| tr F1SOK6 F1SOK6         | 0             | 0          | 0          | 0              | 1              | 0              | 0              | 0  | 0              | 0          | 0          | 0              | 2              | 0              | 0              | 0  | 0.0%              | 0.0%       | 0.0%       | 0.0%           | 1.5%           | 0.0%           | 0.0%           |                |
| tr I3LUJ7 I3LUJ7         | 0             | 0          | 0          | 0              | 1              | 0              | 0              | 0  | 0              | 0          | 0          | 0              | 2              | 0              | 0              | 0  | 0.0%              | 0.0%       | 0.0%       | 0.0%           | 1.7%           | 0.0%           | 0.0%           |                |
| tr F1SLL2 F1SLL2         | 0             | 0          | 0          | 1              | 0              | 0              | 0              | 0  | 0              | 0          | 0          | 2              | 0              | 0              | 0              | 0  | 0.0%              | 0.0%       | 0.0%       | 2.3%           | 0.0%           | 0.0%           | 0.0%           |                |
| tr I3LMO0 I3LMO0         | 0             | 0          | 1          | 0              | 1              | 0              | 2              | 10 | 0              | 0          | 4          | 0              | 1              | 0              | 14             | 55 | 0.0%              | 0.0%       | 2.5%       | 0.0%           | 1.1%           | 0.0%           | 4.8%           |                |
| tr K7GKS4 K7GKS4         | 0             | 0          | 1          | 0              | 1              | 0              | 0              | 2  | 0              | 0          | 1          | 0              | 1              | 0              | 0              | 8  | 0.0%              | 0.0%       | 6.8%       | 0.0%           | 6.8%           | 0.0%           | 14.1%          |                |
| tr F1S7D3 F1S7D3         | 0             | 0          | 1          | 1              | 0              | 0              | 1              | 0  | 0              | 0          | 1          | 1              | 0              | 0              | 6              | 0  | 0.0%              | 0.0%       | 4.9%       | 12.1%          | 0.0%           | 0.0%           | 5.8%           |                |
| P51781                   | 0             | 0          | 1          | 1              | 0              | 0              | 1              | 0  | 0              | 0          | 1          | 1              | 0              | 0              | 6              | 0  | 0.0%              | 0.0%       | 5.0%       | 12.2%          | 0.0%           | 0.0%           | 5.9%           |                |
| tr F1SBQ5 F1SBQ5         | 0             | 0          | 2          | 1              | 0              | 0              | 1              | 3  | 0              | 0          | 7          | 1              | 0              | 0              | 12             | 29 | 0.0%              | 0.0%       | 8.8%       | 2.0%           | 0.0%           | 0.0%           | 3.2%           |                |
| tr F1RNK3 F1RNK3         | 0             | 0          | 1          | 0              | 1              | 0              | 1              | 2  | 0              | 0          | 1          | 0              | 1              | 0              | 1              | 4  | 0.0%              | 0.0%       | 7.1%       | 0.0%           | 7.1%           | 0.0%           | 12.7%          |                |
| tr F1S3B4 F1S3B4         | 0             | 0          | 2          | 0              | 1              | 0              | 1              | 2  | 0              | 0          | 9          | 0              | 1              | 0              | 15             | 12 | 0.0%              | 0.0%       | 4.7%       | 0.0%           | 7.0%           | 0.0%           | 24.5%          |                |
| tr K7GQU3 K7GQU3         | 0             | 0          | 1          | 1              | 0              | 0              | 2              | 1  | 0              | 0          | 7          | 1              | 0              | 0              | 14             | 1  | 0.0%              | 0.0%       | 13.6%      | 13.6%          | 0.0%           | 0.0%           | 24.7%          |                |
| tr F1S7C9 F1S7C9         | 0             | 0          | 1          | 1              | 0              | 0              | 0              | 0  | 0              | 0          | 1          | 1              | 0              | 0              | 0              | 0  | 0.0%              | 0.0%       | 4.9%       | 12.1%          | 0.0%           | 0.0%           | 0.0%           |                |
| tr I3LMD8 I3LMD8         | 0             | 0          | 1          | 0              | 1              | 0              | 0              | 1  | 0              | 0          | 4          | 0              | 1              | 0              | 0              | 1  | 0.0%              | 0.0%       | 0.9%       | 0.0%           | 1.0%           | 0.0%           | 1.1%           |                |
| tr F1SE22 F1SE22         | 0             | 0          | 1          | 0              | 1              | 0              | 0              | 0  | 0              | 0          | 2          | 0              | 1              | 0              | 0              | 0  | 0.0%              | 0.0%       | 3.7%       | 0.0%           | 2.5%           | 0.0%           | 0.0%           |                |
| tr F1R282 F1R282         | 0             | 0          | 1          | 1              | 0              | 0              | 0              | 0  | 0              | 0          | 2          | 1              | 0              | 0              | 0              | 0  | 0.0%              | 0.0%       | 1.1%       | 1.4%           | 0.0%           | 0.0%           | 0.0%           |                |
| tr F1RRR7 F1RRR7         | 0             | 0          | 1          | 1              | 0              | 0              | 0              | 0  | 0              | 0          | 4          | 1              | 0              | 0              | 0              | 0  | 0.0%              | 0.0%       | 5.4%       | 2.9%           | 0.0%           | 0.0%           | 0.0%           |                |
| tr F1SUH2 F1SUH2         | 0             | 0          | 2          | 0              | 1              | 0              | 0              | 0  | 0              | 0          | 5          | 0              | 1              | 0              | 0              | 0  | 0.0%              | 0.0%       | 8.5%       | 0.0%           | 4.9%           | 0.0%           | 0.0%           |                |
| tr O77773 O77773         | 0             | 0          | 0          | 1              | 0              | 0              | 2              | 11 | 0              | 0          | 0          | 1              | 0              | 0              | 38             | 45 | 0.0%              | 0.0%       | 0.0%       | 1.0%           | 0.0%           | 0.0%           | 3.0%           |                |
| Q8SQ34                   | 0             | 0          | 0          | 1              | 0              | 0              | 1              | 3  | 0              | 0          | 0          | 1              | 0              | 0              | 8              | 59 | 0.0%              | 0.0%       | 0.0%       | 3.6%           | 0.0%           | 0.0%           | 9.7%           |                |
| tr K7GKQ2 K7GKQ2         | 0             | 0          | 0          | 1              | 0              | 0              | 1              | 3  | 0              | 0          | 0          | 1              | 0              | 0              | 8              | 59 | 0.0%              | 0.0%       | 0.0%       | 3.8%           | 0.0%           | 0.0%           | 10.3%          |                |
| tr F1RRT6 F1RRT6         | 0             | 0          | 0          | 0              | 1              | 0              | 0              | 2  | 0              | 0          | 0          | 0              | 1              | 0              | 0              | 17 | 0.0%              | 0.0%       | 0.0%       | 0.0%           | 5.2%           | 0.0%           | 18.9%          |                |
| tr F1S1J3 F1S1J3         | 0             | 0          | 0          | 1              | 0              | 0              | 0              | 4  | 0              | 0          | 0          | 1              | 0              | 0              | 0              | 13 | 0.0%              | 0.0%       | 0.0%       | 2.2%           | 0.0%           | 0.0%           | 12.9%          |                |
| tr K7G565 K7G565         | 0             | 0          | 0          | 0              | 0              | 1              | 0              | 1  | 0              | 0          | 0          | 0              | 0              | 1              | 0              | 12 | 0.0%              | 0.0%       | 0.0%       | 0.0%           | 0.0%           | 15.7%          | 0.0%           |                |
| tr F1S3A1 F1S3A1         | 0             | 0          | 0          | 1              | 0              | 0              | 3              | 2  | 0              | 0          | 0          | 1              | 0              | 0              | 5              | 5  | 0.0%              | 0.0%       | 0.0%       | 1.2%           | 0.0%           | 0.0%           | 3.2%           |                |
| tr F1RLT0 F1RLT0         | 0             | 0          | 0          | 0              | 1              | 0              | 1              | 3  | 0              | 0          | 0          | 0              | 1              | 0              | 2              | 7  | 0.0%              | 0.0%       | 0.0%       | 0.0%           | 1.4%           | 0.0%           | 1.6%           |                |
| tr F1SMP5 F1SMP5         | 0             | 0          | 0          | 0              | 1              | 0              | 1              | 1  | 0              | 0          | 0          | 0              | 1              | 0              | 4              | 3  | 0.0%              | 0.0%       | 0.0%       | 0.0%           | 2.0%           | 0.0%           | 1.4%           |                |
| tr F1RHN2 F1RHN2         | 0             | 0          | 0          | 0              | 1              | 0              | 0              | 0  | 0              | 0          | 0          | 0              | 1              | 0              | 0              | 7  | 0.0%              | 0.0%       | 0.0%       | 0.0%           | 2.6%           | 0.0%           | 0.0%           |                |
| tr F1RN32 F1RN32         | 0             | 0          | 0          | 1              | 0              | 0              | 1              | 1  | 0              | 0          | 0          | 1              | 0              | 0              | 4              | 2  | 0.0%              | 0.0%       | 0.0%       | 2.7%           | 0.0%           | 0.0%           | 2.4%           |                |
| tr F1SAI9 F1SAI9         | 0             | 0          | 0          | 1              | 0              | 0              | 2              | 3  | 0              | 0          | 0          | 1              | 0              | 0              | 2              | 4  | 0.0%              | 0.0%       | 0.0%       | 7.2%           | 0.0%           | 0.0%           | 7.2%           |                |
| tr I3LVB7 I3LVB7         | 0             | 0          | 0          | 1              | 0              | 0              | 2              | 3  | 0              | 0          | 0          | 1              | 0              | 0              | 2              | 4  | 0.0%              | 0.0%       | 0.0%       | 6.9%           | 0.0%           | 0.0%           | 6.9%           |                |
| tr F2Z5G0 F2Z5G0         | 0             | 0          | 0          | 0              | 1              | 0              | 0              | 1  | 0              | 0          | 0          | 0              | 1              | 0              | 0              | 5  | 0.0%              | 0.0%       | 0.0%       | 0.0%           | 5.0%           | 0.0%           | 0.0%           |                |
| Q9GLP1                   | 0             | 0          | 0          | 0              | 0              | 1              | 1              | 2  | 0              | 0          | 0          | 0              | 0              | 1              | 2              | 3  | 0.0%              | 0.0%       | 0.0%       | 0.0%           | 0.6%           | 0.6%           | 1.2%           |                |
| tr F1S9Z2 F1S9Z2         | 0             | 0          | 0          | 0              | 1              | 0              | 1              | 1  | 0              | 0          | 0          | 0              | 1              | 0              | 2              | 3  | 0.0%              | 0.0%       | 0.0%       | 0.0%           | 2.9%           | 0.0%           | 2.2%           |                |
| tr F1RPW2 F1RPW2         | 0             | 0          | 0          | 0              | 0              | 1              | 1              | 2  | 0              | 0          | 0          | 0              | 0              | 1              | 2              | 3  | 0.0%              | 0.0%       | 0.0%       | 0.0%           | 0.6%           | 0.6%           | 1.2%           |                |
| tr F1STC7 F1STC7         | 0             | 0          | 0          | 1              | 0              | 0              | 0              | 2  | 0              | 0          | 0          | 1              | 0              | 0              | 0              | 5  | 0.0%              | 0.0%       | 0.0%       | 1.5%           | 0.0%           | 0.0%           | 8.4%           |                |
| tr F1ST93 F1ST93         | 0             | 0          | 0          | 1              | 0              | 0              | 1              | 1  | 0              | 0          | 0          | 1              | 0              | 0              | 4              | 1  | 0.0%              | 0.0%       | 0.0%       | 2.5%           | 0.0%           | 0.0%           | 4.1%           |                |
| tr K7QB9 K7QB9           | 0             | 0          | 0          | 1              | 0              | 0              | 1              | 0  | 0              | 0          | 0          | 1              | 0              | 0              | 4              | 0  | 0.0%              | 0.0%       | 0.0%       | 4.8%           | 0.0%           | 0.0%           | 4.2%           |                |
| tr F1S5M5 F1S5M5         | 0             | 0          | 0          | 1              | 0              | 0              | 0              | 1  | 0              | 0          | 0          | 1              | 0              | 0              | 0              | 4  | 0.0%              | 0.0%       | 0.0%       | 4.6%           | 0.0%           | 0.0%           | 4.1%           |                |
| tr F1RTL2 F1RTL2         | 0             | 0          | 0          | 1              | 0              | 0              | 0              | 2  | 0              | 0          | 0          | 1              | 0              | 0              | 0              | 3  | 0.0%              | 0.0%       | 0.0%       | 1.9%           | 0.0%           | 0.0%           | 5.0%           |                |
| tr I3LFJ4 I3LFJ4         | 0             | 0          | 0          | 0              | 1              | 0              | 1              | 0  | 0              | 0          | 0          | 0              | 1              | 0              | 3              | 0  | 0.0%              | 0.0%       | 0.0%       | 0.0%           | 1.7%           | 0.0%           | 2.1%           |                |
| tr I3LFV7 I3LFV7         | 0             | 0          | 0          | 0              | 1              | 0              | 1              | 0  | 0              | 0          | 0          | 0              | 1              | 0              | 3              | 0  | 0.0%              | 0.0%       | 0.0%       | 0.0%           | 2.2%           | 0.0%           | 2.8%           |                |
| tr F1RPH3 F1RPH3         | 0             | 0          | 0          | 0              | 1              | 0              | 0              | 2  | 0              | 0          | 0          | 0              | 1              | 0              | 0              | 2  | 0.0%              | 0.0%       | 0.0%       | 0.0%           | 1.7%           | 0.0%           | 0.0%           |                |
| tr K7GT44 K7GT44         | 0             | 0          | 0          | 0              | 1              | 0              | 0              | 2  | 0              | 0          | 0          | 0              | 1              | 0              | 0              | 2  | 0.0%              | 0.0%       | 0.0%       | 0.0%           | 1.7%           | 0.0%           | 0.0%           |                |
| tr F1RWL1 F1RWL1         | 0             | 0          | 0          | 0              | 1              | 0              | 0              | 1  | 0              | 0          | 0          | 0              | 1              | 0              | 0              | 2  | 0.0%              | 0.0%       | 0.0%       | 0.0%           | 2.8%           | 0.0%           | 0.0%           |                |
| tr F1RW53 F1RW53         | 0             | 0          | 0          | 1              | 0              | 0              | 1              | 1  | 0              | 0          | 0          | 1              | 0              | 0              | 1              | 1  | 0.0%              | 0.0%       | 0.0%       | 9.5%           | 0.0%           | 0.0%           | 7.9%           |                |
| tr K7GRX8 K7GRX8         | 0             | 0          | 0          | 0              | 1              | 0              |                |    |                |            |            |                |                |                |                |    |                   |            |            |                |                |                |                |                |

| Sample#                  | Peptide Count |            |            |                |                |                |                |   | Spectral Count |            |            |                |                |                |                |   | Sequence Coverage |            |            |                |                |                |                |                |
|--------------------------|---------------|------------|------------|----------------|----------------|----------------|----------------|---|----------------|------------|------------|----------------|----------------|----------------|----------------|---|-------------------|------------|------------|----------------|----------------|----------------|----------------|----------------|
|                          | Whole Cell    | Whole Cell | Whole Cell | Cilia Fraction | Cilia Fraction | Cilia Fraction | Cilia Fraction |   | Whole Cell     | Whole Cell | Whole Cell | Cilia Fraction | Cilia Fraction | Cilia Fraction | Cilia Fraction |   | Whole Cell        | Whole Cell | Whole Cell | Cilia Fraction |
|                          | 1             | 2          | 6          | 4              | 3              | 5              | 7              | 8 | 1              | 2          | 6          | 4              | 3              | 5              | 7              | 8 | 1                 | 2          | 6          | 4              | 3              | 5              | 7              | 8              |
| Accession                |               |            |            |                |                |                |                |   |                |            |            |                |                |                |                |   |                   |            |            |                |                |                |                |                |
| tr I3LUG6 I3LUG6         | 0             | 0          | 0          | 0              | 1              | 0              | 0              | 0 | 0              | 0          | 0          | 0              | 1              | 0              | 0              | 0 | 0.0%              | 0.0%       | 0.0%       | 0.0%           | 6.6%           | 0.0%           | 0.0%           | 0.0%           |
| tr F1SCG2 F1SCG2         | 0             | 0          | 0          | 0              | 1              | 0              | 0              | 0 | 0              | 0          | 0          | 0              | 1              | 0              | 0              | 0 | 0.0%              | 0.0%       | 0.0%       | 0.0%           | 2.3%           | 0.0%           | 0.0%           | 0.0%           |
| Reverse_tr F1SSN6 F1SSN6 | 0             | 0          | 0          | 0              | 1              | 0              | 0              | 0 | 0              | 0          | 0          | 0              | 1              | 0              | 0              | 0 | 0.0%              | 0.0%       | 0.0%       | 0.0%           | 2.9%           | 0.0%           | 0.0%           | 0.0%           |
| tr I3LDR6 I3LDR6         | 0             | 0          | 0          | 0              | 0              | 1              | 0              | 0 | 0              | 0          | 0          | 0              | 0              | 1              | 0              | 0 | 0.0%              | 0.0%       | 0.0%       | 0.0%           | 0.0%           | 2.0%           | 0.0%           | 0.0%           |
| tr F1S414 F1S414         | 0             | 0          | 0          | 0              | 1              | 0              | 0              | 0 | 0              | 0          | 0          | 0              | 1              | 0              | 0              | 0 | 0.0%              | 0.0%       | 0.0%       | 0.0%           | 1.3%           | 0.0%           | 0.0%           | 0.0%           |
| Reverse_tr F1S6B4 F1S6B4 | 0             | 0          | 0          | 1              | 0              | 0              | 0              | 0 | 0              | 0          | 0          | 1              | 0              | 0              | 0              | 0 | 0.0%              | 0.0%       | 0.0%       | 2.1%           | 0.0%           | 0.0%           | 0.0%           | 0.0%           |
| tr F1S6V0 F1S6V0         | 0             | 0          | 0          | 1              | 0              | 0              | 0              | 0 | 0              | 0          | 0          | 1              | 0              | 0              | 0              | 0 | 0.0%              | 0.0%       | 0.0%       | 3.4%           | 0.0%           | 0.0%           | 0.0%           | 0.0%           |
| Reverse_tr F1RZ19 F1RZ19 | 0             | 0          | 0          | 1              | 0              | 0              | 0              | 0 | 0              | 0          | 0          | 1              | 0              | 0              | 0              | 0 | 0.0%              | 0.0%       | 0.0%       | 1.1%           | 0.0%           | 0.0%           | 0.0%           | 0.0%           |
| tr C3VML0 C3VML0         | 0             | 0          | 0          | 0              | 1              | 0              | 0              | 0 | 0              | 0          | 0          | 0              | 1              | 0              | 0              | 0 | 0.0%              | 0.0%       | 0.0%       | 0.0%           | 5.7%           | 0.0%           | 0.0%           | 0.0%           |
| Reverse_tr K7GQG6 K7GQG6 | 0             | 0          | 0          | 0              | 1              | 0              | 0              | 0 | 0              | 0          | 0          | 0              | 1              | 0              | 0              | 0 | 0.0%              | 0.0%       | 0.0%       | 0.0%           | 4.3%           | 0.0%           | 0.0%           | 0.0%           |
| tr F1SEV7 F1SEV7         | 0             | 0          | 0          | 0              | 0              | 1              | 0              | 0 | 0              | 0          | 0          | 0              | 0              | 1              | 0              | 0 | 0.0%              | 0.0%       | 0.0%       | 0.0%           | 0.0%           | 5.5%           | 0.0%           | 0.0%           |
| tr B6DZ39 B6DZ39         | 0             | 0          | 0          | 0              | 1              | 0              | 0              | 0 | 0              | 0          | 0          | 0              | 1              | 0              | 0              | 0 | 0.0%              | 0.0%       | 0.0%       | 0.0%           | 3.9%           | 0.0%           | 0.0%           | 0.0%           |
| tr F1RQP7 F1RQP7         | 0             | 0          | 0          | 1              | 0              | 0              | 0              | 0 | 0              | 0          | 0          | 1              | 0              | 0              | 0              | 0 | 0.0%              | 0.0%       | 0.0%       | 1.5%           | 0.0%           | 0.0%           | 0.0%           | 0.0%           |
| tr F1SE88 F1SE88         | 0             | 0          | 0          | 0              | 1              | 0              | 0              | 0 | 0              | 0          | 0          | 0              | 1              | 0              | 0              | 0 | 0.0%              | 0.0%       | 0.0%       | 0.0%           | 1.1%           | 0.0%           | 0.0%           | 0.0%           |
| Reverse_tr F1SV69 F1SV69 | 0             | 0          | 0          | 0              | 1              | 0              | 0              | 0 | 0              | 0          | 0          | 0              | 1              | 0              | 0              | 0 | 0.0%              | 0.0%       | 0.0%       | 0.0%           | 3.2%           | 0.0%           | 0.0%           | 0.0%           |
| Reverse_tr F1RVD6 F1RVD6 | 0             | 0          | 0          | 0              | 0              | 1              | 0              | 0 | 0              | 0          | 0          | 0              | 0              | 1              | 0              | 0 | 0.0%              | 0.0%       | 0.0%       | 0.0%           | 0.0%           | 3.2%           | 0.0%           | 0.0%           |
| Reverse_tr I3LGC6 I3LGC6 | 0             | 0          | 0          | 0              | 1              | 0              | 0              | 0 | 0              | 0          | 0          | 0              | 1              | 0              | 0              | 0 | 0.0%              | 0.0%       | 0.0%       | 0.0%           | 0.6%           | 0.0%           | 0.0%           | 0.0%           |
| Reverse_tr F1SIP0 F1SIP0 | 0             | 0          | 0          | 0              | 1              | 0              | 0              | 0 | 0              | 0          | 0          | 0              | 1              | 0              | 0              | 0 | 0.0%              | 0.0%       | 0.0%       | 0.0%           | 5.5%           | 0.0%           | 0.0%           | 0.0%           |
| Reverse_tr F1S6P2 F1S6P2 | 0             | 0          | 0          | 1              | 0              | 0              | 0              | 0 | 0              | 0          | 0          | 1              | 0              | 0              | 0              | 0 | 0.0%              | 0.0%       | 0.0%       | 3.3%           | 0.0%           | 0.0%           | 0.0%           | 0.0%           |
| tr F1SRM1 F1SRM1         | 0             | 0          | 0          | 0              | 1              | 0              | 0              | 0 | 0              | 0          | 0          | 0              | 1              | 0              | 0              | 0 | 0.0%              | 0.0%       | 0.0%       | 0.0%           | 0.7%           | 0.0%           | 0.0%           | 0.0%           |
| tr F1SNV8 F1SNV8         | 0             | 0          | 0          | 1              | 0              | 0              | 0              | 0 | 0              | 0          | 0          | 1              | 0              | 0              | 0              | 0 | 0.0%              | 0.0%       | 0.0%       | 4.1%           | 0.0%           | 0.0%           | 0.0%           | 0.0%           |
| tr F1S012 F1S012         | 0             | 0          | 0          | 0              | 1              | 0              | 0              | 0 | 0              | 0          | 0          | 0              | 1              | 0              | 0              | 0 | 0.0%              | 0.0%       | 0.0%       | 0.0%           | 3.2%           | 0.0%           | 0.0%           | 0.0%           |
| tr F1RS03 F1RS03         | 0             | 0          | 0          | 0              | 1              | 0              | 0              | 0 | 0              | 0          | 0          | 0              | 1              | 0              | 0              | 0 | 0.0%              | 0.0%       | 0.0%       | 0.0%           | 4.9%           | 0.0%           | 0.0%           | 0.0%           |
| tr F1S887 F1S887         | 0             | 0          | 0          | 1              | 0              | 0              | 0              | 0 | 0              | 0          | 0          | 1              | 0              | 0              | 0              | 0 | 0.0%              | 0.0%       | 0.0%       | 3.3%           | 0.0%           | 0.0%           | 0.0%           | 0.0%           |
| tr F1RKK2 F1RKK2         | 0             | 0          | 0          | 0              | 1              | 0              | 0              | 0 | 0              | 0          | 0          | 0              | 1              | 0              | 0              | 0 | 0.0%              | 0.0%       | 0.0%       | 0.0%           | 0.7%           | 0.0%           | 0.0%           | 0.0%           |
| tr I3L905 I3L905         | 0             | 0          | 0          | 0              | 1              | 0              | 0              | 0 | 0              | 0          | 0          | 0              | 1              | 0              | 0              | 0 | 0.0%              | 0.0%       | 0.0%       | 0.0%           | 16.3%          | 0.0%           | 0.0%           | 0.0%           |
| tr K7GP73 K7GP73         | 0             | 0          | 0          | 1              | 0              | 0              | 0              | 0 | 0              | 0          | 0          | 1              | 0              | 0              | 0              | 0 | 0.0%              | 0.0%       | 0.0%       | 3.3%           | 0.0%           | 0.0%           | 0.0%           | 0.0%           |
| tr I3LNM9 I3LNM9         | 0             | 0          | 0          | 1              | 0              | 0              | 0              | 0 | 0              | 0          | 0          | 1              | 0              | 0              | 0              | 0 | 0.0%              | 0.0%       | 0.0%       | 2.7%           | 0.0%           | 0.0%           | 0.0%           | 0.0%           |
| tr K7GMH0 K7GMH0         | 0             | 0          | 0          | 0              | 1              | 0              | 0              | 0 | 0              | 0          | 0          | 0              | 1              | 0              | 0              | 0 | 0.0%              | 0.0%       | 0.0%       | 0.0%           | 0.9%           | 0.0%           | 0.0%           | 0.0%           |
| tr K7GNV8 K7GNV8         | 0             | 0          | 0          | 1              | 0              | 0              | 0              | 0 | 0              | 0          | 0          | 1              | 0              | 0              | 0              | 0 | 0.0%              | 0.0%       | 0.0%       | 6.0%           | 0.0%           | 0.0%           | 0.0%           | 0.0%           |
| tr I3LIU9 I3LIU9         | 0             | 0          | 0          | 0              | 0              | 1              | 0              | 0 | 0              | 0          | 0          | 0              | 0              | 1              | 0              | 0 | 0.0%              | 0.0%       | 0.0%       | 0.0%           | 0.0%           | 2.1%           | 0.0%           | 0.0%           |
| tr I3LCJ4 I3LCJ4         | 0             | 0          | 0          | 0              | 1              | 0              | 0              | 0 | 0              | 0          | 0          | 0              | 1              | 0              | 0              | 0 | 0.0%              | 0.0%       | 0.0%       | 0.0%           | 4.6%           | 0.0%           | 0.0%           | 0.0%           |
| Reverse_tr F1SSE6 F1SSE6 | 0             | 0          | 0          | 0              | 1              | 0              | 0              | 0 | 0              | 0          | 0          | 0              | 1              | 0              | 0              | 0 | 0.0%              | 0.0%       | 0.0%       | 0.0%           | 7.2%           | 0.0%           | 0.0%           | 0.0%           |
| tr F1S6V1 F1S6V1         | 0             | 0          | 0          | 0              | 1              | 0              | 0              | 0 | 0              | 0          | 0          | 0              | 1              | 0              | 0              | 0 | 0.0%              | 0.0%       | 0.0%       | 0.0%           | 1.0%           | 0.0%           | 0.0%           | 0.0%           |
| tr F1SJS4 F1SJS4         | 0             | 0          | 0          | 0              | 1              | 0              | 0              | 0 | 0              | 0          | 0          | 0              | 1              | 0              | 0              | 0 | 0.0%              | 0.0%       | 0.0%       | 0.0%           | 0.5%           | 0.0%           | 0.0%           | 0.0%           |
| Reverse_sp Q9MZS9 KMO    | 0             | 0          | 0          | 1              | 0              | 0              | 0              | 0 | 0              | 0          | 0          | 0              | 1              | 0              | 0              | 0 | 0.0%              | 0.0%       | 0.0%       | 3.8%           | 0.0%           | 0.0%           | 0.0%           | 0.0%           |
| tr F1SJB9 F1SJB9         | 0             | 0          | 0          | 1              | 0              | 0              | 0              | 0 | 0              | 0          | 0          | 1              | 0              | 0              | 0              | 0 | 0.0%              | 0.0%       | 0.0%       | 3.6%           | 0.0%           | 0.0%           | 0.0%           | 0.0%           |
| tr F1SDM5 F1SDM5         | 0             | 0          | 0          | 0              | 1              | 0              | 0              | 0 | 0              | 0          | 0          | 0              | 1              | 0              | 0              | 0 | 0.0%              | 0.0%       | 0.0%       | 0.0%           | 1.6%           | 0.0%           | 0.0%           | 0.0%           |
| tr F1RV90 F1RV90         | 0             | 0          | 0          | 0              | 1              | 0              | 0              | 0 | 0              | 0          | 0          | 0              | 1              | 0              | 0              | 0 | 0.0%              | 0.0%       | 0.0%       | 0.0%           | 2.7%           | 0.0%           | 0.0%           | 0.0%           |
| tr I3LP68 I3LP68         | 0             | 0          | 0          | 0              | 1              | 0              | 0              | 0 | 0              | 0          | 0          | 0              | 1              | 0              | 0              | 0 | 0.0%              | 0.0%       | 0.0%       | 0.0%           | 1.5%           | 0.0%           | 0.0%           | 0.0%           |
| Reverse_tr F1SBJ0 F1SBJ0 | 0             | 0          | 0          | 0              | 1              | 0              | 0              | 0 | 0              | 0          | 0          | 0              | 1              | 0              | 0              | 0 | 0.0%              | 0.0%       | 0.0%       | 0.0%           | 4.2%           | 0.0%           | 0.0%           | 0.0%           |
| Reverse_tr I3LU47 I3LU47 | 0             | 0          | 0          | 0              | 1              | 0              | 0              | 0 | 0              | 0          | 0          | 0              | 0              | 1              | 0              | 0 | 0.0%              | 0.0%       | 0.0%       | 0.0%           | 11.7%          | 0.0%           | 0.0%           | 0.0%           |
| tr K7GKW1 K7GKW1         | 0             | 0          | 0          | 0              | 1              | 0              | 0              | 0 | 0              | 0          | 0          | 0              | 1              | 0              | 0              | 0 | 0.0%              | 0.0%       | 0.0%       | 0.0%           | 6.3%           | 0.0%           | 0.0%           | 0.0%           |
| tr K7GQZ6 K7GQZ6         | 0             | 0          | 0          | 0              | 1              | 0              | 0              | 0 | 0              | 0          | 0          | 0              | 1              | 0              | 0              | 0 | 0.0%              | 0.0%       | 0.0%       | 0.0%           | 7.5%           | 0.0%           | 0.0%           | 0.0%           |
| tr F1RSK2 F1RSK2         | 0             | 0          | 0          | 0              | 1              | 0              | 0              | 0 | 0              | 0          | 0          | 0              | 1              | 0              | 0              | 0 | 0.0%              | 0.0%       | 0.0%       | 0.0%           | 1.2%           | 0.0%           | 0.0%           | 0.0%           |
| tr I3LPB2 I3LPB2         | 0             | 0          | 0          | 0              | 1              | 0              | 0              | 0 | 0              | 0          | 0          | 0              | 1              | 0              | 0              | 0 | 0.0%              | 0.0%       | 0.0%       | 0.0%           | 2.7%           | 0.0%           | 0.0%           | 0.0%           |
| Reverse_tr F1SIP7 F1SIP7 | 0             | 0          | 0          | 0              | 0              | 1              | 0              | 0 | 0              | 0          | 0          | 0              | 0              | 1              | 0              | 0 | 0.0%              | 0.0%       | 0.0%       | 0.0%           | 0.0%           | 5.1%           | 0.0%           | 0.0%           |
| Q29043                   | 0             | 0          | 0          | 1              | 0              | 0              | 0              | 0 | 0              | 0          | 0          | 1              | 0              | 0              | 0              | 0 | 0.0%              | 0.0%       | 0.0%       | 4.7%           | 0.0%           | 0.0%           | 0.0%           | 0.0%           |
| Reverse_tr F1RFL3 F1RFL3 | 0             | 0          | 0          | 0              | 0              | 1              | 0              | 0 | 0              | 0          | 0          | 0              | 0              | 1              | 0              | 0 | 0.0%              | 0.0%       | 0.0%       | 0.0%           | 0.0%           | 10.2%          | 0.0%           | 0.0%           |
| tr F1SHV8 F1SHV8         | 0             | 0          | 0          | 0              | 1              | 0              | 0              | 0 | 0              | 0          | 0          | 0              | 1              | 0              | 0              | 0 | 0.0%              | 0.0%       | 0.0%       | 0.0%           | 2.0%           | 0.0%           | 0.0%           | 0.0%           |
| tr F1SDH4 F1SDH4         | 0             | 0          | 0          | 1              | 0              | 0              | 0              | 0 | 0              | 0          | 0          | 1              | 0              | 0              | 0              | 0 | 0.0%              | 0.0%       | 0.0%       | 4.8%           | 0.0%           | 0.0%           | 0.0%           | 0.0%           |
| tr F1SLE9 F1SLE9         | 0             | 0          | 0          | 0              | 1              | 0              | 0              | 0 | 0              | 0          | 0          | 0              | 1              | 0              | 0              | 0 | 0.0%              | 0.0%       | 0.0%       | 0.0%           | 3.2%           | 0.0%           | 0.0%           | 0.0%           |
| Reverse_tr F1RU59 F1RU59 | 0             | 0          | 0          | 0              | 1              | 0              | 0              | 0 | 0              | 0          | 0          | 0              | 1              | 0              | 0              | 0 | 0.0%              | 0.0%       | 0.0%       | 0.0%           | 0.6%           | 0.0%           | 0.0%           | 0.0%           |
| tr K7GQF2 K7GQF2         | 0             | 0          | 0          | 0              | 1              | 0              | 0              | 0 | 0              | 0          | 0          | 0              | 1              | 0              | 0              | 0 | 0.0%              | 0.0%       | 0.0%       | 0.0%           | 5.2%           | 0.0%           | 0.0%           | 0.0%           |
| tr F1SIH2 F1SIH2         | 0             | 0          | 0          | 0              | 1              | 0              | 0              | 0 | 0              | 0          | 0          | 0              | 1              | 0              | 0              | 0 | 0.0%              | 0.0%       | 0.0%       | 0.0%           | 1.2%           | 0.0%           | 0.0%           | 0.0%           |
| tr I3L932 I3L932         | 0             | 0          | 0          | 1              | 0              | 0              | 0              | 0 | 0              | 0          | 0          | 1              | 0              | 0              | 0              | 0 | 0.0%              | 0.0%       | 0.0%       | 3.6%           | 0.0%           | 0.0%           | 0.0%           | 0.0%           |
| tr I3LKZ5 I3LKZ5         | 0             | 0          | 0          | 1              | 0              | 0              | 0              | 0 | 0              | 0          | 0          | 1              | 0              | 0              | 0              | 0 | 0.0%              | 0.0%       | 0.0%       | 0.2%           | 0.0%           | 0.0%           | 0.0%           | 0.0%           |
| tr F1RQJ6 F1RQJ6         | 0             | 0          | 0          | 1              | 0              | 0              | 0              | 0 | 0              | 0          | 0          | 1              | 0              | 0              | 0              | 0 | 0.0%              | 0.0%       | 0.0%       | 2.4%           | 0.0%           | 0.0%           | 0.0%           | 0.0%           |
| Reverse_tr I3LEH7 I3LEH7 | 0             | 0          | 0          | 0              | 0              | 1              | 0              | 0 | 0              | 0          | 0          | 0              | 0              | 1              | 0              | 0 | 0.0%              | 0.0%       | 0.0%       | 0.0%           | 0.0%           | 5.1%           | 0.0%           | 0.0%           |
| tr F1SQN2 F1SQN2         | 0             | 0          | 0          | 0              | 1              | 0              | 0              | 0 | 0              | 0          | 0          | 0              | 1              | 0              | 0              | 0 | 0.0%              | 0.0%       | 0.0%       | 0.0%           | 0.4%           | 0.0%           | 0.0%           | 0.0%           |
| tr F1REZ4 F1REZ4         | 0             | 0          | 0          | 0              | 1              | 0              | 0              | 0 | 0              | 0          | 0          | 0              | 1              | 0              | 0              | 0 | 0.0%              | 0.0%       | 0.0%       | 0.0%           | 4.1%           | 0.0%           | 0.0%           | 0.0%           |
| tr F1SID3 F1SID3         | 0             | 0          | 0          | 1              | 0              | 0              | 0              | 0 | 0              | 0          | 0          | 1              | 0              | 0              | 0              | 0 | 0.0%              | 0.0%       | 0.0%       | 5.8%           | 0.0%           | 0.0%           | 0.0%           | 0.0%           |
| tr I3LK96 I3LK96         | 0             | 0          | 0          | 0              | 1              | 0              | 0              | 0 | 0              | 0          | 0          | 0              | 1              | 0              | 0              | 0 | 0.0%              | 0.0%       | 0.0%       | 0.0%           | 1.3%           | 0.0%           | 0.0%           | 0.0%           |
| tr F1SMI                 |               |            |            |                |                |                |                |   |                |            |            |                |                |                |                |   |                   |            |            |                |                |                |                |                |

| Sample#                  | Peptide Count |            |            |                |                |                |                | Spectral Count |            |            |                |                |                |                | Sequence Coverage |            |            |                |                |                |                |       |       |       |
|--------------------------|---------------|------------|------------|----------------|----------------|----------------|----------------|----------------|------------|------------|----------------|----------------|----------------|----------------|-------------------|------------|------------|----------------|----------------|----------------|----------------|-------|-------|-------|
|                          | Whole Cell    | Whole Cell | Whole Cell | Cilia Fraction | Cilia Fraction | Cilia Fraction | Cilia Fraction | Whole Cell     | Whole Cell | Whole Cell | Cilia Fraction | Cilia Fraction | Cilia Fraction | Cilia Fraction | Whole Cell        | Whole Cell | Whole Cell | Cilia Fraction | Cilia Fraction | Cilia Fraction | Cilia Fraction |       |       |       |
|                          | 1             | 2          | 6          | 4              | 3              | 5              | 7              | 8              | 1          | 2          | 6              | 4              | 3              | 5              | 7                 | 8          | 1          | 2              | 6              | 4              | 3              | 5     | 7     | 8     |
| Accession                |               |            |            |                |                |                |                |                |            |            |                |                |                |                |                   |            |            |                |                |                |                |       |       |       |
| tr I3LS30 I3LS30         | 3             | 0          | 1          | 3              | 4              | 3              | 7              | 12             | 3          | 0          | 2              | 13             | 21             | 3              | 81                | 145        | 4.3%       | 0.0%           | 3.0%           | 4.9%           | 8.2%           | 4.5%  | 15.4% | 19.6% |
| tr F1SK03 F1SK03         | 5             | 4          | 4          | 15             | 21             | 7              | 30             | 46             | 8          | 9          | 30             | 93             | 80             | 15             | 1312              | 884        | 11.6%      | 4.9%           | 6.6%           | 17.8%          | 23.6%          | 9.0%  | 36.9% | 45.8% |
| tr I3LD66 I3LD66         | 0             | 1          | 0          | 1              | 1              | 0              | 1              | 3              | 0          | 1          | 0              | 7              | 4              | 0              | 17                | 32         | 0.0%       | 6.2%           | 0.0%           | 6.2%           | 6.2%           | 0.0%  | 10.6% | 14.4% |
| Reverse_tr I3LVS7 I3LVS7 | 0             | 1          | 0          | 1              | 1              | 1              | 0              | 0              | 0          | 1          | 0              | 3              | 6              | 2              | 0                 | 0          | 0.0%       | 8.8%           | 0.0%           | 8.8%           | 8.8%           | 8.8%  | 0.0%  | 0.0%  |
| P15145                   | 5             | 4          | 2          | 15             | 20             | 6              | 28             | 44             | 8          | 9          | 20             | 93             | 79             | 14             | 985               | 639        | 11.6%      | 4.9%           | 5.1%           | 17.8%          | 22.0%          | 7.5%  | 35.3% | 44.2% |
| Q767L6                   | 2             | 0          | 3          | 2              | 3              | 0              | 6              | 21             | 2          | 0          | 22             | 7              | 14             | 0              | 28                | 130        | 7.5%       | 0.0%           | 7.5%           | 4.4%           | 7.0%           | 0.0%  | 21.8% | 43.1% |
| tr K7GPJ9 K7GPJ9         | 2             | 0          | 3          | 2              | 3              | 0              | 3              | 13             | 2          | 0          | 22             | 7              | 14             | 0              | 22                | 104        | 10.5%      | 0.0%           | 10.5%          | 6.2%           | 9.8%           | 0.0%  | 15.1% | 34.4% |
| tr K7GPK7 K7GPK7         | 1             | 0          | 5          | 2              | 2              | 0              | 1              | 1              | 1          | 0          | 70             | 3              | 7              | 0              | 1                 | 2          | 37.9%      | 0.0%           | 43.9%          | 33.3%          | 37.9%          | 0.0%  | 37.9% | 37.9% |
| P22411                   | 5             | 2          | 4          | 6              | 9              | 0              | 19             | 27             | 5          | 2          | 28             | 31             | 34             | 0              | 1116              | 614        | 6.0%       | 3.0%           | 4.3%           | 8.6%           | 12.7%          | 0.0%  | 24.8% | 32.9% |
| tr K7GMV8 K7GMV8         | 3             | 0          | 0          | 3              | 4              | 3              | 4              | 13             | 4          | 0          | 0              | 13             | 21             | 3              | 52                | 116        | 9.0%       | 0.0%           | 0.0%           | 9.2%           | 15.3%          | 8.5%  | 17.0% | 38.0% |
| tr K7GP66 K7GP66         | 2             | 0          | 1          | 2              | 2              | 1              | 6              | 24             | 2          | 0          | 1              | 11             | 4              | 2              | 40                | 108        | 1.4%       | 0.0%           | 0.9%           | 1.4%           | 1.4%           | 0.6%  | 6.1%  | 19.9% |
| tr K7GPD4 K7GPD4         | 2             | 0          | 1          | 2              | 2              | 1              | 6              | 24             | 2          | 0          | 1              | 11             | 4              | 2              | 40                | 108        | 1.4%       | 0.0%           | 0.8%           | 1.4%           | 1.4%           | 0.6%  | 5.9%  | 19.3% |
| tr F1RVY6 F1RVY6         | 2             | 0          | 1          | 2              | 2              | 1              | 6              | 24             | 2          | 0          | 1              | 11             | 4              | 2              | 40                | 108        | 1.4%       | 0.0%           | 0.8%           | 1.4%           | 1.4%           | 0.5%  | 5.9%  | 19.1% |
| tr F1SQX4 F1SQX4         | 1             | 0          | 1          | 2              | 3              | 0              | 7              | 24             | 1          | 0          | 4              | 5              | 3              | 0              | 178               | 199        | 1.2%       | 0.0%           | 3.1%           | 2.6%           | 11.4%          | 0.0%  | 18.6% | 38.9% |
| tr I3LK11 I3LK11         | 1             | 0          | 0          | 1              | 1              | 0              | 1              | 0              | 1          | 0          | 0              | 3              | 5              | 0              | 7                 | 0          | 10.6%      | 0.0%           | 0.0%           | 10.6%          | 10.6%          | 0.0%  | 10.6% | 0.0%  |
| tr I3LTW0 I3LTW0         | 1             | 0          | 0          | 1              | 1              | 0              | 1              | 0              | 1          | 0          | 0              | 3              | 5              | 0              | 7                 | 0          | 8.9%       | 0.0%           | 0.0%           | 8.9%           | 8.9%           | 0.0%  | 8.9%  | 0.0%  |
| tr Q7JFN4 Q7JFN4         | 1             | 0          | 2          | 1              | 1              | 0              | 0              | 0              | 1          | 0          | 14             | 7              | 1              | 0              | 0                 | 0          | 3.7%       | 0.0%           | 7.1%           | 1.7%           | 5.8%           | 0.0%  | 0.0%  | 0.0%  |
| tr Q7JFN2 Q7JFN2         | 1             | 0          | 2          | 1              | 1              | 0              | 0              | 0              | 1          | 0          | 14             | 7              | 1              | 0              | 0                 | 0          | 3.5%       | 0.0%           | 6.9%           | 1.7%           | 5.6%           | 0.0%  | 0.0%  | 0.0%  |
| tr Q7JFN3 Q7JFN3         | 1             | 0          | 2          | 1              | 1              | 0              | 0              | 0              | 1          | 0          | 14             | 7              | 1              | 0              | 0                 | 0          | 3.8%       | 0.0%           | 7.5%           | 1.8%           | 6.1%           | 0.0%  | 0.0%  | 0.0%  |
| tr K7GM56 K7GM56         | 0             | 3          | 0          | 2              | 3              | 0              | 1              | 0              | 0          | 6          | 0              | 18             | 24             | 0              | 2                 | 0          | 0.0%       | 20.4%          | 0.0%           | 12.0%          | 20.4%          | 0.0%  | 11.1% | 0.0%  |
| tr F1RGX4 F1RGX4         | 0             | 3          | 0          | 2              | 3              | 0              | 1              | 0              | 0          | 6          | 0              | 18             | 24             | 0              | 2                 | 0          | 0.0%       | 15.5%          | 0.0%           | 9.2%           | 15.5%          | 0.0%  | 8.5%  | 0.0%  |
| tr K7GQP8 K7GQP8         | 0             | 3          | 0          | 2              | 3              | 0              | 1              | 0              | 0          | 6          | 0              | 18             | 24             | 0              | 2                 | 0          | 0.0%       | 18.0%          | 0.0%           | 10.7%          | 18.0%          | 0.0%  | 9.8%  | 0.0%  |
| tr K7GLP2 K7GLP2         | 0             | 3          | 0          | 2              | 3              | 0              | 1              | 0              | 0          | 6          | 0              | 18             | 24             | 0              | 2                 | 0          | 0.0%       | 20.0%          | 0.0%           | 11.8%          | 20.0%          | 0.0%  | 10.9% | 0.0%  |
| P01965                   | 0             | 3          | 0          | 2              | 3              | 0              | 1              | 0              | 0          | 6          | 0              | 18             | 24             | 0              | 2                 | 0          | 0.0%       | 15.6%          | 0.0%           | 9.2%           | 15.6%          | 0.0%  | 8.5%  | 0.0%  |
| tr K7GKK8 K7GKK8         | 1             | 0          | 0          | 2              | 2              | 0              | 4              | 8              | 1          | 0          | 0              | 5              | 2              | 0              | 115               | 51         | 2.6%       | 0.0%           | 0.0%           | 5.5%           | 14.0%          | 0.0%  | 24.7% | 35.2% |
| tr F1RTK2 F1RTK2         | 1             | 0          | 0          | 1              | 1              | 0              | 1              | 1              | 1          | 0          | 0              | 3              | 4              | 0              | 6                 | 1          | 2.9%       | 0.0%           | 0.0%           | 2.9%           | 2.9%           | 0.0%  | 2.9%  | 2.9%  |
| tr I3LQK6 I3LQK6         | 1             | 0          | 0          | 1              | 1              | 0              | 1              | 1              | 1          | 0          | 0              | 3              | 4              | 0              | 6                 | 1          | 2.5%       | 0.0%           | 0.0%           | 2.5%           | 2.5%           | 0.0%  | 2.5%  | 2.5%  |
| tr F1RL74 F1RL74         | 1             | 0          | 1          | 1              | 0              | 0              | 0              | 0              | 1          | 0          | 3              | 7              | 0              | 0              | 0                 | 0          | 4.0%       | 0.0%           | 2.5%           | 1.9%           | 0.0%           | 0.0%  | 0.0%  | 0.0%  |
| tr I3LSJ3 I3LSJ3         | 1             | 0          | 1          | 1              | 0              | 0              | 0              | 0              | 1          | 0          | 3              | 7              | 0              | 0              | 0                 | 0          | 4.9%       | 0.0%           | 3.1%           | 2.3%           | 0.0%           | 0.0%  | 0.0%  | 0.0%  |
| tr I3LNG5 I3LNG5         | 1             | 0          | 1          | 1              | 0              | 0              | 0              | 0              | 1          | 0          | 3              | 7              | 0              | 0              | 0                 | 0          | 5.0%       | 0.0%           | 3.2%           | 2.4%           | 0.0%           | 0.0%  | 0.0%  | 0.0%  |
| tr K7GT33 K7GT33         | 2             | 0          | 2          | 3              | 5              | 1              | 10             | 11             | 2          | 0          | 4              | 4              | 8              | 1              | 176               | 177        | 9.9%       | 0.0%           | 2.5%           | 8.7%           | 15.9%          | 1.9%  | 30.6% | 31.3% |
| tr F1SQ78 F1SQ78         | 8             | 1          | 6          | 9              | 8              | 4              | 15             | 26             | 14         | 1          | 38             | 48             | 35             | 9              | 356               | 321        | 10.3%      | 1.2%           | 6.4%           | 9.3%           | 7.7%           | 3.8%  | 18.6% | 25.0% |
| tr F1RP41 F1RP41         | 1             | 0          | 0          | 3              | 4              | 2              | 4              | 8              | 2          | 1          | 0              | 5              | 9              | 4              | 111               | 176        | 9.8%       | 4.9%           | 0.0%           | 12.9%          | 16.0%          | 8.7%  | 30.3% | 32.4% |
| tr F1RSY8 F1RSY8         | 1             | 0          | 0          | 1              | 1              | 0              | 0              | 3              | 2          | 0          | 0              | 8              | 4              | 0              | 0                 | 4          | 3.7%       | 0.0%           | 0.0%           | 2.5%           | 2.5%           | 0.0%  | 0.0%  | 9.6%  |
| tr F1RII6 F1RII6         | 0             | 1          | 0          | 1              | 1              | 0              | 1              | 1              | 0          | 1          | 0              | 2              | 4              | 0              | 8                 | 2          | 0.0%       | 6.8%           | 0.0%           | 6.8%           | 6.8%           | 0.0%  | 6.1%  | 6.1%  |
| P02101                   | 0             | 1          | 0          | 1              | 1              | 0              | 1              | 1              | 0          | 1          | 0              | 2              | 4              | 0              | 8                 | 2          | 0.0%       | 6.8%           | 0.0%           | 6.8%           | 6.8%           | 0.0%  | 6.1%  | 6.1%  |
| tr F1RII5 F1RII5         | 0             | 1          | 0          | 1              | 1              | 0              | 1              | 1              | 0          | 1          | 0              | 2              | 4              | 0              | 8                 | 2          | 0.0%       | 6.9%           | 0.0%           | 6.9%           | 6.9%           | 0.0%  | 6.2%  | 6.2%  |
| P04246                   | 0             | 1          | 0          | 1              | 1              | 0              | 1              | 1              | 0          | 1          | 0              | 2              | 4              | 0              | 8                 | 2          | 0.0%       | 6.8%           | 0.0%           | 6.8%           | 6.8%           | 0.0%  | 6.2%  | 6.2%  |
| tr I3LPD9 I3LPD9         | 0             | 1          | 1          | 2              | 2              | 0              | 1              | 2              | 0          | 1          | 2              | 4              | 2              | 0              | 4                 | 12         | 0.0%       | 6.8%           | 9.3%           | 6.8%           | 16.0%          | 0.0%  | 9.3%  | 19.1% |
| tr F1SAX5 F1SAX5         | 1             | 0          | 1          | 1              | 1              | 0              | 2              | 1              | 1          | 0          | 5              | 5              | 1              | 0              | 12                | 10         | 8.1%       | 0.0%           | 8.1%           | 4.1%           | 4.1%           | 0.0%  | 21.7% | 13.6% |
| tr I3LDS3 I3LDS3         | 0             | 4          | 0          | 1              | 12             | 3              | 0              | 4              | 0          | 8          | 0              | 2              | 40             | 5              | 0                 | 75         | 0.0%       | 7.9%           | 0.0%           | 1.6%           | 18.7%          | 3.1%  | 0.0%  | 12.0% |
| tr F1SP55 F1SP55         | 3             | 1          | 3          | 3              | 6              | 3              | 5              | 9              | 3          | 1          | 13             | 7              | 9              | 7              | 17                | 58         | 2.9%       | 1.3%           | 4.6%           | 3.1%           | 4.5%           | 3.8%  | 6.9%  | 11.9% |
| tr I3LEES I3LEES         | 2             | 0          | 0          | 2              | 2              | 4              | 8              | 11             | 2          | 0          | 0              | 4              | 3              | 4              | 159               | 139        | 4.6%       | 0.0%           | 0.0%           | 2.9%           | 2.4%           | 6.0%  | 14.8% | 16.7% |
| tr F1RGCA F1RGCA         | 1             | 1          | 1          | 3              | 4              | 0              | 2              | 2              | 1          | 1          | 1              | 5              | 5              | 0              | 135               | 49         | 20.0%      | 20.0%          | 20.0%          | 26.4%          | 32.8%          | 0.0%  | 32.8% | 20.0% |
| tr F1RGCB F1RGCB         | 1             | 1          | 1          | 3              | 4              | 0              | 2              | 2              | 1          | 1          | 1              | 5              | 5              | 0              | 135               | 49         | 19.8%      | 19.8%          | 19.8%          | 26.2%          | 32.5%          | 0.0%  | 32.5% | 19.8% |
| tr F1SSY5 F1SSY5         | 1             | 0          | 0          | 1              | 2              | 0              | 1              | 8              | 1          | 0          | 0              | 1              | 4              | 0              | 2                 | 39         | 5.1%       | 0.0%           | 0.0%           | 1.9%           | 7.9%           | 0.0%  | 2.2%  | 18.9% |
| tr I3LNT8 I3LNT8         | 1             | 0          | 0          | 1              | 1              | 2              | 1              | 2              | 1          | 0          | 0              | 2              | 1              | 2              | 10                | 8          | 1.9%       | 0.0%           | 0.0%           | 2.5%           | 4.8%           | 4.8%  | 4.8%  | 6.7%  |
| tr F1SAG0 F1SAG0         | 1             | 0          | 1          | 1              | 1              | 0              | 2              | 6              | 1          | 0          | 5              | 3              | 2              | 0              | 10                | 33         | 1.4%       | 0.0%           | 1.3%           | 1.2%           | 1.4%           | 0.0%  | 2.5%  | 7.4%  |
| Q9MZ16                   | 2             | 2          | 8          | 1              | 5              | 8              | 5              | 7              | 3          | 3          | 211            | 1              | 8              | 19             | 38                | 28         | 7.1%       | 14.8%          | 27.2%          | 7.8%           | 25.4%          | 31.4% | 26.1% | 36.0% |
| tr F1SHC0 F1SHC0         | 2             | 1          | 1          | 2              | 2              | 2              | 1              | 2              | 2          | 17         | 4              | 33             | 48             | 6              | 152               | 7          | 6.2%       | 2.8%           | 2.3%           | 5.4%           | 5.4%           | 3.1%  | 2.8%  | 3.1%  |
| tr K7GKQ4 K7GKQ4         | 2             | 0          | 0          | 1              | 2              | 1              | 2              | 3              | 4          | 0          | 0              | 7              | 8              | 3              | 19                | 77         | 47.3%      | 0.0%           | 0.0%           | 27.3%          | 47.3%          | 47.3% | 47.3% | 47.3% |
| P79385                   | 0             | 1          | 0          | 3              | 1              | 5              | 7              | 12             | 0          | 6          | 0              | 10             | 1              | 13             | 64                | 85         | 0.0%       | 3.7%           | 0.0%           | 9.5%           | 3.7%           | 12.2% | 28.4% | 30.3% |
| tr B2CFZ8 B2CFZ8         | 0             | 1          | 0          | 3              | 1              | 5              | 7              | 12             | 0          | 6          | 0              | 10             | 1              | 13             | 64                | 85         | 0.0%       | 3.5%           | 0.0%           | 9.0%           | 3.5%           | 11.6% | 26.9% | 28.8% |
| tr K7GQE4 K7GQE4         | 1             | 0          | 1          | 0              | 2              | 1              | 1              | 4              | 3          | 0          | 6              | 0              | 10             | 2              | 36                | 46         | 31.2%      | 0.0%           | 27.3%          | 0.0%           | 31.2%          | 31.2% | 27.3% | 58.4% |
| tr I3LUQ7 I3LUQ7         | 1             | 1          | 1          | 3              | 4              | 0              | 1              | 2              | 1          | 1          | 1              | 3              | 5              | 0              | 134               | 49         | 19.8%      | 19.8%          | 19.8%          | 26.2%          | 32.5%          | 0.0%  | 19.8% | 19.8% |
| tr F1S091 F1S091         | 1             | 1          | 0          | 1              | 1              | 0              | 1              | 1              | 1          | 1          | 0              | 4              | 4              | 0              | 35                | 3          | 7.6%       | 7.6%           | 0.0%           | 7.6%           | 7.6%           | 0.0%  | 7.6%  | 7.1%  |
| tr I3LH60 I3LH60         | 0             | 1          | 0          | 1              | 1              | 0              | 2              | 7              | 0          | 2          | 0              | 3              | 5              | 0              | 9                 | 19         | 0.0%       | 8.2%           | 0.0%           | 8.2%           | 8.2%           | 0.0%  | 22.4% | 43.2% |
| tr F2Z519 F2Z519         | 0             | 1          | 0          | 1              | 1              | 0              | 2              | 4              | 0          | 2          | 0              | 3              | 5              | 0              | 9                 | 14         | 0.0%       | 14.3%          | 0.0%           | 14.3%          | 14.3%          | 0.0%  | 39.0% | 48.6% |
| tr I3LFS8 I3LFS8         | 1             | 0          | 1          | 1              | 2              | 1              | 8              | 6              | 1          | 0          | 8              | 1              | 2              | 1              | 54                | 44         | 4.3%       | 0.0%           | 3.2%           | 3.2%           | 7.6%           | 5.7%  | 28.6% | 16.0% |
| tr F1RNA6 F1RNA6         | 1             | 0          | 1          | 1              | 2              | 1              | 8              | 6              | 1          | 0          | 8              | 1              | 2              | 1              | 54                | 44         | 4.6%       | 0.0%           | 3.4%           | 3.4%           | 8.0%           | 6.1%  | 30.3% | 17.0% |
| tr F1RQK5 F1RQK5         | 1             | 0          | 0          | 1              | 1              | 0              | 0              | 0              | 1          | 0          | 0              | 2              | 2              | 0              | 0                 | 0          | 5.0%       | 0.0%           | 0.0%           | 5.0%           | 5.0%           | 0.0%  | 0.0%  | 0.0%  |
| tr I3LPW8 I3LPW8         | 6             | 2          | 4          | 5              | 9              | 3              | 4              | 17             | 9          | 2          | 14             | 18             | 22             | 3              | 39                | 395        | 18.2%      | 5.1%           | 11.1%          | 11.1%          | 15.2%          | 7.3%  | 11.7% | 32.4% |
| tr F1SRS2 F1SRS2         | 7             | 4          | 0          |                |                |                |                |                |            |            |                |                |                |                |                   |            |            |                |                |                |                |       |       |       |

| Sample#          | Peptide Count |            |            |                |                |                |                |                | Spectral Count |            |            |                |                |                |                |                | Sequence Coverage |            |            |                |                |                |                |                |
|------------------|---------------|------------|------------|----------------|----------------|----------------|----------------|----------------|----------------|------------|------------|----------------|----------------|----------------|----------------|----------------|-------------------|------------|------------|----------------|----------------|----------------|----------------|----------------|
|                  | Whole Cell    | Whole Cell | Whole Cell | Cilia Fraction | Whole Cell     | Whole Cell | Whole Cell | Cilia Fraction | Whole Cell        | Whole Cell | Whole Cell | Cilia Fraction |
|                  | 1             | 2          | 6          | 4              | 3              | 5              | 7              | 8              | 1              | 2          | 6          | 4              | 3              | 5              | 7              | 8              | 1                 | 2          | 6          | 4              | 3              | 5              | 7              | 8              |
| Accession        |               |            |            |                |                |                |                |                |                |            |            |                |                |                |                |                |                   |            |            |                |                |                |                |                |
| tr F1SMF6 F1SMF6 | 1             | 1          | 0          | 1              | 1              | 1              | 1              | 6              | 1              | 6          | 0          | 12             | 7              | 2              | 2              | 32             | 1.1%              | 0.9%       | 0.0%       | 0.9%           | 0.9%           | 0.9%           | 0.9%           | 10.5%          |
| tr K7GS51 K7GS51 | 1             | 1          | 0          | 1              | 1              | 1              | 1              | 5              | 1              | 6          | 0          | 12             | 7              | 2              | 2              | 31             | 2.0%              | 1.7%       | 0.0%       | 1.7%           | 1.7%           | 1.7%           | 1.7%           | 18.2%          |
| tr F1SNG6 F1SNG6 | 3             | 0          | 1          | 1              | 2              | 0              | 2              | 3              | 4              | 0          | 2          | 6              | 6              | 0              | 6              | 8              | 19.9%             | 0.0%       | 2.7%       | 5.6%           | 12.0%          | 0.0%           | 5.6%           | 9.3%           |
| tr F2Z5I8 F2Z5I8 | 2             | 1          | 0          | 2              | 1              | 0              | 2              | 0              | 2              | 1          | 0          | 5              | 4              | 0              | 38             | 0              | 13.0%             | 7.2%       | 0.0%       | 14.0%          | 7.2%           | 0.0%           | 14.0%          | 0.0%           |
| tr F1SUW3 F1SUW3 | 0             | 1          | 0          | 1              | 1              | 0              | 1              | 1              | 0              | 1          | 0          | 2              | 1              | 0              | 16             | 12             | 0.0%              | 5.0%       | 0.0%       | 5.0%           | 5.0%           | 0.0%           | 6.7%           | 6.7%           |
| tr I3LH10 I3LH10 | 0             | 1          | 0          | 0              | 1              | 1              | 0              | 0              | 0              | 1          | 0          | 0              | 2              | 1              | 0              | 0              | 0.0%              | 2.2%       | 0.0%       | 0.0%           | 2.2%           | 2.2%           | 0.0%           | 0.0%           |
| tr I3L5F1 I3L5F1 | 0             | 1          | 0          | 1              | 1              | 0              | 0              | 0              | 0              | 1          | 0          | 1              | 2              | 0              | 0              | 0              | 0.0%              | 0.7%       | 0.0%       | 0.6%           | 0.6%           | 0.0%           | 0.0%           | 0.0%           |
| tr F1SUJ6 F1SUJ6 | 1             | 0          | 0          | 1              | 1              | 0              | 0              | 0              | 1              | 0          | 0          | 1              | 2              | 0              | 0              | 0              | 9.8%              | 0.0%       | 0.0%       | 9.8%           | 9.8%           | 0.0%           | 0.0%           | 0.0%           |
| tr I3L8L2 I3L8L2 | 1             | 0          | 0          | 1              | 1              | 0              | 0              | 0              | 1              | 0          | 0          | 2              | 1              | 0              | 0              | 0              | 5.2%              | 0.0%       | 0.0%       | 11.6%          | 11.6%          | 0.0%           | 0.0%           | 0.0%           |
| tr I3L9Z8 I3L9Z8 | 1             | 0          | 0          | 1              | 1              | 0              | 0              | 0              | 1              | 0          | 0          | 2              | 1              | 0              | 0              | 0              | 8.1%              | 0.0%       | 0.0%       | 10.0%          | 10.0%          | 0.0%           | 0.0%           | 0.0%           |
| tr F1RXG3 F1RXG3 | 0             | 1          | 0          | 0              | 1              | 1              | 0              | 0              | 0              | 1          | 0          | 0              | 2              | 1              | 0              | 0              | 0.0%              | 1.8%       | 0.0%       | 0.0%           | 1.8%           | 1.8%           | 0.0%           | 0.0%           |
| Q6PQD5           | 0             | 1          | 0          | 1              | 1              | 0              | 0              | 0              | 0              | 1          | 0          | 1              | 2              | 0              | 0              | 0              | 0.0%              | 0.5%       | 0.0%       | 0.5%           | 0.5%           | 0.0%           | 0.0%           | 0.0%           |
| tr K7GQH2 K7GQH2 | 0             | 1          | 0          | 1              | 2              | 0              | 0              | 0              | 0              | 1          | 0          | 1              | 2              | 0              | 0              | 0              | 0.0%              | 6.4%       | 0.0%       | 5.9%           | 6.4%           | 0.0%           | 0.0%           | 0.0%           |
| tr I3LK01 I3LK01 | 0             | 1          | 0          | 1              | 1              | 0              | 1              | 1              | 0              | 21         | 0          | 11             | 51             | 0              | 14             | 13             | 0.0%              | 2.4%       | 0.0%       | 2.4%           | 2.4%           | 0.0%           | 2.4%           | 2.4%           |
| tr F1RR02 F1RR02 | 0             | 1          | 0          | 1              | 1              | 0              | 1              | 1              | 0              | 21         | 0          | 11             | 51             | 0              | 14             | 13             | 0.0%              | 2.6%       | 0.0%       | 2.6%           | 2.6%           | 0.0%           | 2.6%           | 2.6%           |
| tr Q06AS6 Q06AS6 | 10            | 6          | 8          | 10             | 15             | 4              | 15             | 24             | 26             | 56         | 28         | 112            | 108            | 9              | 465            | 429            | 43.4%             | 15.5%      | 21.7%      | 36.9%          | 42.8%          | 8.5%           | 40.6%          | 57.2%          |
| tr F1RYJ4 F1RYJ4 | 6             | 4          | 6          | 5              | 6              | 4              | 11             | 23             | 10             | 12         | 45         | 29             | 20             | 12             | 127            | 286            | 12.5%             | 2.5%       | 9.3%       | 4.1%           | 5.3%           | 3.7%           | 15.9%          | 36.6%          |
| tr F1SR53 F1SR53 | 3             | 3          | 4          | 6              | 6              | 3              | 7              | 11             | 6              | 7          | 20         | 19             | 12             | 5              | 83             | 115            | 2.2%              | 2.9%       | 4.2%       | 7.1%           | 4.9%           | 3.3%           | 13.2%          | 16.8%          |
| tr F1SM86 F1SM86 | 0             | 1          | 0          | 1              | 1              | 0              | 0              | 1              | 0              | 4          | 0          | 5              | 6              | 0              | 0              | 27             | 0.0%              | 1.0%       | 0.0%       | 1.0%           | 1.0%           | 0.0%           | 0.0%           | 1.5%           |
| tr F1SL62 F1SL62 | 0             | 1          | 0          | 1              | 1              | 1              | 1              | 1              | 0              | 4          | 0          | 4              | 6              | 1              | 2              | 1              | 0.0%              | 1.5%       | 0.0%       | 1.5%           | 1.5%           | 1.5%           | 1.5%           | 1.5%           |
| tr F1SL82 F1SL82 | 0             | 1          | 0          | 1              | 1              | 1              | 1              | 1              | 0              | 4          | 0          | 4              | 6              | 1              | 2              | 1              | 0.0%              | 1.2%       | 0.0%       | 1.2%           | 1.2%           | 1.2%           | 1.2%           | 1.2%           |
| tr K7GT59 K7GT59 | 6             | 4          | 6          | 5              | 6              | 3              | 11             | 21             | 10             | 12         | 45         | 29             | 20             | 11             | 127            | 270            | 13.5%             | 2.7%       | 10.1%      | 4.5%           | 5.7%           | 2.7%           | 17.2%          | 35.8%          |
| tr K7GMP6 K7GMP6 | 6             | 4          | 6          | 5              | 6              | 3              | 11             | 21             | 10             | 12         | 45         | 29             | 20             | 11             | 127            | 270            | 13.4%             | 2.7%       | 10.0%      | 4.4%           | 5.7%           | 2.7%           | 17.0%          | 35.6%          |
| tr K7GPM1 K7GPM1 | 6             | 4          | 6          | 5              | 6              | 3              | 11             | 21             | 10             | 12         | 45         | 29             | 20             | 11             | 127            | 270            | 13.6%             | 2.8%       | 10.1%      | 4.5%           | 5.8%           | 2.8%           | 17.3%          | 36.0%          |
| Q2EN75           | 0             | 3          | 1          | 0              | 4              | 1              | 0              | 1              | 0              | 3          | 11         | 0              | 7              | 1              | 0              | 1              | 0.0%              | 34.4%      | 10.0%      | 0.0%           | 17.8%          | 16.7%          | 0.0%           | 17.8%          |
| Q95266           | 2             | 0          | 3          | 1              | 1              | 0              | 0              | 1              | 3              | 0          | 20         | 7              | 1              | 0              | 0              | 1              | 8.8%              | 0.0%       | 10.6%      | 1.8%           | 6.0%           | 0.0%           | 0.0%           | 5.0%           |
| tr F1SGI2 F1SGI2 | 2             | 2          | 2          | 1              | 1              | 2              | 2              | 2              | 3              | 22         | 3          | 11             | 51             | 2              | 20             | 28             | 1.8%              | 4.1%       | 3.3%       | 2.3%           | 2.3%           | 3.7%           | 4.1%           | 4.1%           |
| tr F1RNT9 F1RNT9 | 2             | 2          | 2          | 1              | 1              | 1              | 1              | 1              | 2              | 2          | 2          | 5              | 4              | 1              | 3              | 1              | 4.3%              | 2.3%       | 3.6%       | 1.5%           | 1.5%           | 1.5%           | 1.5%           | 3.5%           |
| tr F1SGH0 F1SGH0 | 2             | 0          | 1          | 1              | 2              | 0              | 3              | 11             | 2              | 0          | 3          | 1              | 4              | 0              | 10             | 34             | 3.1%              | 0.0%       | 1.8%       | 1.2%           | 4.0%           | 0.0%           | 6.3%           | 13.5%          |
| tr F1RR07 F1RR07 | 0             | 1          | 0          | 2              | 3              | 0              | 0              | 2              | 0              | 2          | 0          | 2              | 3              | 0              | 0              | 8              | 0.0%              | 1.9%       | 0.0%       | 3.2%           | 5.1%           | 0.0%           | 0.0%           | 4.8%           |
| tr I3L8R7 I3L8R7 | 7             | 0          | 0          | 3              | 5              | 1              | 3              | 10             | 17             | 0          | 0          | 21             | 18             | 2              | 84             | 302            | 21.7%             | 0.0%       | 0.0%       | 8.7%           | 16.5%          | 6.2%           | 17.4%          | 24.5%          |
| F1S584           | 0             | 1          | 0          | 1              | 1              | 0              | 1              | 3              | 0              | 5          | 0          | 8              | 4              | 0              | 9              | 9              | 0.0%              | 1.4%       | 0.0%       | 1.4%           | 1.4%           | 0.0%           | 3.0%           | 5.4%           |
| tr I3LCQ9 I3LCQ9 | 2             | 1          | 1          | 2              | 3              | 0              | 4              | 11             | 2              | 1          | 5          | 4              | 3              | 0              | 21             | 99             | 24.1%             | 5.1%       | 5.1%       | 5.1%           | 23.6%          | 0.0%           | 25.9%          | 40.3%          |
| tr I3LQN8 I3LQN8 | 3             | 3          | 1          | 1              | 1              | 0              | 2              | 2              | 4              | 23         | 2          | 11             | 51             | 0              | 20             | 28             | 4.1%              | 6.2%       | 1.3%       | 2.1%           | 2.1%           | 0.0%           | 3.7%           | 3.7%           |
| tr F2Z4Z8 F2Z4Z8 | 6             | 4          | 5          | 5              | 11             | 2              | 12             | 17             | 21             | 6          | 27         | 25             | 33             | 3              | 881            | 617            | 32.4%             | 24.9%      | 21.7%      | 22.7%          | 52.4%          | 13.6%          | 57.0%          | 57.0%          |
| tr F1SFV3 F1SFV3 | 5             | 0          | 3          | 1              | 2              | 1              | 4              | 8              | 8              | 0          | 70         | 7              | 8              | 3              | 129            | 142            | 63.5%             | 0.0%       | 33.7%      | 14.4%          | 25.0%          | 25.0%          | 44.2%          | 63.5%          |
| tr F1RV14 F1RV14 | 0             | 1          | 0          | 1              | 1              | 0              | 2              | 3              | 0              | 7          | 0          | 8              | 7              | 0              | 5              | 6              | 0.0%              | 2.6%       | 0.0%       | 2.6%           | 2.6%           | 0.0%           | 6.1%           | 10.0%          |
| tr F1RFC5 F1RFC5 | 0             | 1          | 0          | 1              | 1              | 0              | 1              | 1              | 0              | 7          | 0          | 8              | 7              | 0              | 1              | 4              | 0.0%              | 5.2%       | 0.0%       | 5.2%           | 5.2%           | 0.0%           | 5.2%           | 5.2%           |
| Q9GLP0           | 14            | 4          | 3          | 9              | 11             | 2              | 15             | 24             | 46             | 14         | 25         | 73             | 41             | 13             | 620            | 585            | 23.3%             | 7.8%       | 4.6%       | 14.4%          | 19.3%          | 2.1%           | 19.7%          | 24.3%          |
| tr F1RX15 F1RX15 | 7             | 0          | 1          | 1              | 5              | 2              | 5              | 24             | 10             | 0          | 2          | 8              | 8              | 5              | 30             | 235            | 9.0%              | 0.0%       | 1.4%       | 2.5%           | 5.5%           | 4.1%           | 13.1%          | 38.2%          |
| tr K7GSB2 K7GSB2 | 7             | 0          | 2          | 1              | 5              | 2              | 5              | 27             | 10             | 0          | 5          | 8              | 8              | 5              | 30             | 242            | 7.9%              | 0.0%       | 2.8%       | 2.2%           | 4.8%           | 3.6%           | 11.6%          | 35.6%          |
| tr I3LSK5 I3LSK5 | 9             | 4          | 7          | 5              | 11             | 2              | 14             | 19             | 24             | 6          | 39         | 25             | 33             | 3              | 885            | 675            | 35.3%             | 22.6%      | 25.6%      | 20.6%          | 47.6%          | 12.4%          | 57.6%          | 57.6%          |
| tr F1RVE7 F1RVE7 | 15            | 4          | 3          | 9              | 11             | 2              | 15             | 28             | 49             | 14         | 25         | 73             | 41             | 13             | 620            | 636            | 27.8%             | 7.8%       | 4.6%       | 14.4%          | 19.3%          | 2.1%           | 19.7%          | 28.8%          |
| tr F1S6B3 F1S6B3 | 7             | 3          | 4          | 2              | 3              | 1              | 6              | 21             | 9              | 3          | 13         | 8              | 15             | 1              | 60             | 145            | 11.5%             | 7.5%       | 10.3%      | 6.5%           | 8.5%           | 2.5%           | 14.3%          | 36.5%          |
| tr I3LH22 I3LH22 | 2             | 1          | 0          | 0              | 1              | 0              | 1              | 1              | 2              | 1          | 0          | 0              | 6              | 0              | 2              | 3              | 21.9%             | 5.3%       | 0.0%       | 0.0%           | 15.2%          | 0.0%           | 9.9%           | 6.6%           |
| tr F1RKY1 F1RKY1 | 1             | 1          | 0          | 1              | 1              | 0              | 0              | 2              | 1              | 2          | 0          | 3              | 3              | 0              | 0              | 2              | 3.5%              | 4.3%       | 0.0%       | 4.3%           | 4.3%           | 0.0%           | 0.0%           | 16.3%          |
| tr I3LPP1 I3LPP1 | 2             | 0          | 3          | 1              | 1              | 0              | 0              | 0              | 3              | 0          | 18         | 1              | 5              | 0              | 0              | 0              | 20.5%             | 0.0%       | 24.7%      | 7.4%           | 7.4%           | 0.0%           | 0.0%           | 0.0%           |
| tr K7GQR8 K7GQR8 | 0             | 1          | 0          | 1              | 2              | 0              | 1              | 3              | 0              | 2          | 0          | 2              | 2              | 0              | 3              | 34             | 0.0%              | 7.5%       | 0.0%       | 7.5%           | 17.7%          | 0.0%           | 10.2%          | 20.4%          |
| tr I3LDD6 I3LDD6 | 0             | 2          | 0          | 1              | 1              | 0              | 0              | 0              | 0              | 2          | 0          | 3              | 1              | 0              | 0              | 0              | 0.0%              | 5.5%       | 0.0%       | 2.7%           | 2.7%           | 0.0%           | 0.0%           | 0.0%           |
| tr V9GZ89 V9GZ89 | 1             | 0          | 0          | 1              | 0              | 0              | 1              | 7              | 1              | 0          | 0          | 2              | 0              | 0              | 8              | 55             | 2.0%              | 0.0%       | 0.0%       | 2.2%           | 0.0%           | 0.0%           | 4.8%           | 19.3%          |
| tr F1RS11 F1RS11 | 0             | 1          | 0          | 0              | 1              | 0              | 1              | 9              | 0              | 1          | 0          | 0              | 2              | 0              | 5              | 37             | 0.0%              | 2.7%       | 0.0%       | 0.0%           | 2.7%           | 0.0%           | 5.5%           | 23.3%          |
| tr F1SAW7 F1SAW7 | 1             | 0          | 0          | 0              | 1              | 1              | 1              | 2              | 1              | 0          | 0          | 0              | 1              | 1              | 2              | 5              | 2.1%              | 0.0%       | 0.0%       | 0.0%           | 2.1%           | 2.1%           | 5.9%           | 6.9%           |
| tr F1RLJ0 F1RLJ0 | 0             | 1          | 0          | 0              | 1              | 0              | 1              | 1              | 0              | 1          | 0          | 0              | 2              | 0              | 1              | 6              | 0.0%              | 1.3%       | 0.0%       | 0.0%           | 1.3%           | 0.0%           | 1.3%           | 1.3%           |
| tr A5GFT0 A5GFT0 | 1             | 0          | 0          | 0              | 1              | 1              | 1              | 0              | 1              | 0          | 0          | 0              | 1              | 1              | 3              | 0              | 5.8%              | 0.0%       | 0.0%       | 0.0%           | 5.8%           | 5.8%           | 5.8%           | 0.0%           |
| tr A5GFT2 A5GFT2 | 1             | 0          | 0          | 0              | 1              | 1              | 1              | 0              | 1              | 0          | 0          | 0              | 1              | 1              | 3              | 0              | 5.6%              | 0.0%       | 0.0%       | 0.0%           | 5.6%           | 5.6%           | 5.6%           | 0.0%           |
| tr A5GFS9 A5GFS9 | 1             | 0          | 0          | 0              | 1              | 1              | 1              | 0              | 1              | 0          | 0          | 0              | 1              | 1              | 3              | 0              | 5.9%              | 0.0%       | 0.0%       | 0.0%           | 5.9%           | 5.9%           | 5.9%           | 0.0%           |
| tr A5GFT1 A5GFT1 | 1             | 0          | 0          | 0              | 1              | 1              | 1              | 0              | 1              | 0          | 0          | 0              | 1              | 1              | 3              | 0              | 5.5%              | 0.0%       | 0.0%       | 0.0%           | 5.5%           | 5.5%           | 5.5%           | 0.0%           |
| tr I3LHQ5 I3LHQ5 | 0             | 1          | 0          | 1              | 1              | 0              | 0              | 0              | 0              | 1          | 0          | 1              | 1              | 0              | 0              | 0              | 0.0%              | 11.6%      | 0.0%       | 11.6%          | 11.6%          | 0.0%           | 0.0%           | 0.0%           |
| tr I3LEA8 I3LEA8 | 1             | 0          | 0          | 1              | 0              | 1              | 0              | 0              | 1              | 0          | 0          | 1              | 0              | 1              | 0              | 0              | 2.6%              | 0.0%       | 0.0%       | 2.6%           | 0.0%           | 2.6%           | 0.0%           | 0.0%           |
| tr F1SP12 F1SP12 | 0             | 1          | 0          | 1              | 1              | 0              | 0              | 0              | 0              | 1          | 0          | 1              | 1              | 0              | 0              | 0              | 0.0%              | 1.0%       | 0.0%       | 1.0%           | 1.0%           | 0.0%           | 0.0%           | 0.0%           |
| tr F1SL57 F1SL57 | 1             | 0          | 0          | 1              | 0              | 1              | 0              | 0              | 1              | 0          | 0          | 1              | 0              | 1              | 0              | 0              | 4.1%              | 0.0%       | 0.0%       | 3.5%           | 0.0%           | 3.5%           | 0.0%           | 0.0%           |
| tr I3LGL1 I3LGL1 | 0             | 1          | 0          | 0              | 1              | 0              | 0              | 0              | 0              | 1          | 0          | 0              | 2              | 0              | 0              | 0              | 0.0%              | 2.1%       | 0.0%       | 0.0%           | 2.1%           | 0.0%           | 0.0%           | 0.0%           |
| tr I3LSA0 I3LSA0 | 1             | 0          | 0          | 0              |                |                |                |                |                |            |            |                |                |                |                |                |                   |            |            |                |                |                |                |                |

| Sample#          | Peptide Count |            |            |                |                |                |                | Spectral Count |            |            |                |                |                |                | Sequence Coverage |            |            |                |                |                |                |       |       |       |
|------------------|---------------|------------|------------|----------------|----------------|----------------|----------------|----------------|------------|------------|----------------|----------------|----------------|----------------|-------------------|------------|------------|----------------|----------------|----------------|----------------|-------|-------|-------|
|                  | Whole Cell    | Whole Cell | Whole Cell | Cilia Fraction | Cilia Fraction | Cilia Fraction | Cilia Fraction | Whole Cell     | Whole Cell | Whole Cell | Cilia Fraction | Cilia Fraction | Cilia Fraction | Cilia Fraction | Whole Cell        | Whole Cell | Whole Cell | Cilia Fraction | Cilia Fraction | Cilia Fraction | Cilia Fraction |       |       |       |
|                  | 1             | 2          | 6          | 4              | 3              | 5              | 7              | 8              | 1          | 2          | 6              | 4              | 3              | 5              | 7                 | 8          | 1          | 2              | 6              | 4              | 3              | 5     | 7     | 8     |
| Accession        |               |            |            |                |                |                |                |                |            |            |                |                |                |                |                   |            |            |                |                |                |                |       |       |       |
| tr K7GNJ3 K7GNJ3 | 2             | 0          | 2          | 2              | 2              | 1              | 0              | 6              | 4          | 0          | 10             | 2              | 3              | 2              | 0                 | 20         | 5.7%       | 0.0%           | 2.9%           | 2.4%           | 2.4%           | 1.1%  | 0.0%  | 10.9% |
| tr I3L6Q4 I3L6Q4 | 2             | 0          | 2          | 2              | 2              | 1              | 0              | 6              | 4          | 0          | 10             | 2              | 3              | 2              | 0                 | 20         | 5.8%       | 0.0%           | 2.9%           | 2.4%           | 2.4%           | 1.2%  | 0.0%  | 11.0% |
| tr F2Z4Z3 F2Z4Z3 | 0             | 2          | 0          | 1              | 1              | 0              | 0              | 0              | 0          | 4          | 0              | 4              | 3              | 0              | 0                 | 0          | 0.0%       | 13.7%          | 0.0%           | 8.0%           | 8.0%           | 0.0%  | 0.0%  | 0.0%  |
| tr F1SK70 F1SK70 | 1             | 1          | 0          | 1              | 1              | 1              | 0              | 0              | 1          | 3          | 0              | 3              | 2              | 2              | 0                 | 0          | 9.8%       | 9.8%           | 0.0%           | 9.8%           | 9.8%           | 9.8%  | 0.0%  | 0.0%  |
| tr I3LDA5 I3LDA5 | 0             | 2          | 1          | 4              | 5              | 1              | 2              | 1              | 0          | 28         | 1              | 21             | 25             | 3              | 8                 | 2          | 0.0%       | 5.7%           | 4.9%           | 9.4%           | 12.1%          | 3.0%  | 5.7%  | 4.9%  |
| tr F1S0L1 F1S0L1 | 2             | 4          | 4          | 2              | 6              | 3              | 2              | 2              | 4          | 7          | 37             | 3              | 11             | 5              | 2                 | 7          | 4.2%       | 8.0%           | 6.7%           | 3.8%           | 14.1%          | 3.8%  | 4.8%  | 6.1%  |
| tr F1S833 F1S833 | 4             | 1          | 0          | 1              | 2              | 1              | 0              | 2              | 7          | 3          | 0              | 7              | 8              | 2              | 0                 | 17         | 18.9%      | 4.2%           | 0.0%           | 4.2%           | 8.1%           | 4.2%  | 0.0%  | 16.6% |
| Q58D68           | 13            | 3          | 2          | 13             | 14             | 4              | 12             | 24             | 28         | 48         | 4              | 61             | 48             | 19             | 604               | 903        | 37.7%      | 4.8%           | 10.0%          | 28.9%          | 32.7%          | 9.3%  | 34.8% | 41.4% |
| tr F1S3P8 F1S3P8 | 0             | 1          | 2          | 1              | 1              | 0              | 0              | 1              | 0          | 3          | 4              | 4              | 1              | 0              | 0                 | 1          | 0.0%       | 5.4%           | 10.7%          | 5.4%           | 5.4%           | 0.0%  | 0.0%  | 5.4%  |
| tr Q06AT8 Q06AT8 | 2             | 2          | 0          | 2              | 2              | 2              | 3              | 4              | 14         | 71         | 0              | 70             | 58             | 11             | 13                | 10         | 16.8%      | 4.6%           | 0.0%           | 4.6%           | 4.6%           | 4.6%  | 25.5% | 40.8% |
| tr F1RZ59 F1RZ59 | 10            | 5          | 9          | 6              | 6              | 2              | 6              | 11             | 27         | 10         | 79             | 33             | 25             | 2              | 404               | 260        | 28.5%      | 20.2%          | 24.4%          | 22.7%          | 26.3%          | 6.9%  | 20.2% | 31.3% |
| tr K7GNL6 K7GNL6 | 5             | 6          | 1          | 5              | 9              | 5              | 5              | 9              | 19         | 41         | 4              | 22             | 49             | 26             | 166               | 94         | 14.1%      | 8.5%           | 2.2%           | 8.8%           | 13.5%          | 8.0%  | 8.8%  | 15.3% |
| tr K7GKU7 K7GKU7 | 5             | 6          | 1          | 5              | 9              | 5              | 5              | 9              | 19         | 41         | 4              | 22             | 48             | 26             | 166               | 94         | 14.3%      | 8.7%           | 2.3%           | 8.9%           | 13.7%          | 8.2%  | 8.9%  | 15.5% |
| tr F1S1N1 F1S1N1 | 10            | 5          | 8          | 5              | 6              | 2              | 6              | 10             | 27         | 10         | 78             | 32             | 25             | 2              | 404               | 244        | 28.5%      | 20.2%          | 21.9%          | 20.2%          | 26.3%          | 6.9%  | 20.2% | 28.8% |
| tr F1S1N0 F1S1N0 | 7             | 4          | 6          | 4              | 5              | 2              | 5              | 7              | 17         | 9          | 68             | 23             | 16             | 2              | 398               | 214        | 21.2%      | 14.2%          | 16.0%          | 14.2%          | 20.6%          | 7.3%  | 14.2% | 21.8% |
| tr I3LV59 I3LV59 | 1             | 1          | 0          | 1              | 1              | 0              | 1              | 1              | 3          | 4          | 0              | 3              | 8              | 0              | 115               | 26         | 8.3%       | 8.3%           | 0.0%           | 8.3%           | 8.3%           | 0.0%  | 8.3%  | 8.3%  |
| tr F2Z5R5 F2Z5R5 | 2             | 1          | 1          | 1              | 1              | 0              | 0              | 1              | 3          | 6          | 5              | 9              | 5              | 0              | 0                 | 2          | 17.5%      | 4.7%           | 11.3%          | 4.7%           | 4.7%           | 0.0%  | 0.0%  | 11.3% |
| tr F1SSB5 F1SSB5 | 4             | 2          | 8          | 1              | 1              | 0              | 5              | 7              | 6          | 11         | 154            | 19             | 7              | 0              | 40                | 99         | 9.3%       | 11.3%          | 38.5%          | 5.1%           | 5.1%           | 0.0%  | 31.1% | 31.5% |
| Q52NJ1           | 8             | 4          | 3          | 4              | 4              | 0              | 1              | 6              | 16         | 12         | 13             | 16             | 26             | 0              | 3                 | 34         | 42.1%      | 22.7%          | 14.4%          | 29.2%          | 21.8%          | 0.0%  | 6.9%  | 43.5% |
| tr F1RWU4 F1RWU4 | 3             | 1          | 4          | 0              | 3              | 0              | 6              | 24             | 3          | 1          | 21             | 0              | 6              | 0              | 43                | 152        | 6.9%       | 2.3%           | 9.8%           | 0.0%           | 3.9%           | 0.0%  | 13.6% | 34.2% |
| tr K7GMS4 K7GMS4 | 2             | 0          | 0          | 1              | 2              | 0              | 3              | 6              | 2          | 0          | 0              | 1              | 2              | 0              | 32                | 19         | 10.1%      | 0.0%           | 0.0%           | 7.6%           | 26.1%          | 0.0%  | 32.8% | 52.9% |
| tr F1SI24 F1SI24 | 2             | 0          | 4          | 1              | 1              | 0              | 2              | 5              | 2          | 0          | 9              | 2              | 1              | 0              | 11                | 27         | 13.3%      | 0.0%           | 31.3%          | 8.1%           | 6.6%           | 0.0%  | 19.0% | 39.3% |
| tr F1RZ25 F1RZ25 | 1             | 1          | 1          | 1              | 2              | 0              | 0              | 2              | 1          | 1          | 4              | 1              | 2              | 0              | 0                 | 11         | 2.6%       | 2.8%           | 6.0%           | 2.6%           | 2.8%           | 0.0%  | 0.0%  | 9.4%  |
| tr K7GP41 K7GP41 | 1             | 1          | 1          | 1              | 2              | 0              | 0              | 2              | 1          | 1          | 4              | 1              | 2              | 0              | 0                 | 11         | 2.7%       | 2.9%           | 6.3%           | 2.7%           | 2.9%           | 0.0%  | 0.0%  | 9.9%  |
| tr I3LV82 I3LV82 | 2             | 0          | 0          | 0              | 2              | 0              | 0              | 0              | 2          | 0          | 0              | 0              | 3              | 0              | 0                 | 0          | 5.5%       | 0.0%           | 0.0%           | 0.0%           | 5.5%           | 0.0%  | 0.0%  | 0.0%  |
| Q03365           | 2             | 0          | 0          | 0              | 2              | 0              | 0              | 0              | 2          | 0          | 0              | 0              | 3              | 0              | 0                 | 0          | 3.4%       | 0.0%           | 0.0%           | 0.0%           | 3.4%           | 0.0%  | 0.0%  | 0.0%  |
| tr F1RQM6 F1RQM6 | 1             | 1          | 0          | 2              | 1              | 0              | 0              | 0              | 1          | 1          | 0              | 2              | 1              | 0              | 0                 | 0          | 1.4%       | 1.4%           | 0.0%           | 2.3%           | 0.9%           | 0.0%  | 0.0%  | 0.0%  |
| tr F1RWC9 F1RWC9 | 1             | 0          | 0          | 0              | 1              | 0              | 0              | 0              | 2          | 0          | 0              | 0              | 3              | 0              | 0                 | 0          | 11.3%      | 0.0%           | 0.0%           | 0.0%           | 11.3%          | 0.0%  | 0.0%  | 0.0%  |
| tr I3L6G1 I3L6G1 | 2             | 0          | 0          | 1              | 1              | 0              | 0              | 0              | 2          | 0          | 0              | 2              | 1              | 0              | 0                 | 0          | 5.8%       | 0.0%           | 0.0%           | 5.8%           | 5.8%           | 0.0%  | 0.0%  | 0.0%  |
| tr F1RL81 F1RL81 | 0             | 1          | 2          | 1              | 1              | 0              | 0              | 2              | 0          | 2          | 10             | 1              | 2              | 0              | 0                 | 8          | 0.0%       | 5.6%           | 9.3%           | 5.6%           | 5.6%           | 0.0%  | 0.0%  | 14.1% |
| tr F1RJP9 F1RJP9 | 0             | 1          | 3          | 1              | 1              | 0              | 0              | 1              | 1          | 1          | 8              | 1              | 2              | 0              | 0                 | 3          | 0.6%       | 1.0%           | 4.5%           | 1.0%           | 1.4%           | 0.0%  | 0.0%  | 1.7%  |
| tr F1S9T2 F1S9T2 | 1             | 1          | 3          | 0              | 3              | 0              | 1              | 0              | 1          | 1          | 9              | 0              | 3              | 0              | 2                 | 0          | 2.6%       | 7.9%           | 9.3%           | 0.0%           | 15.2%          | 0.0%  | 4.7%  | 0.0%  |
| tr K7GP25 K7GP25 | 12            | 5          | 5          | 12             | 15             | 5              | 16             | 23             | 32         | 62         | 35             | 59             | 57             | 24             | 107               | 116        | 15.4%      | 5.6%           | 5.5%           | 13.0%          | 13.6%          | 4.0%  | 19.1% | 22.6% |
| tr I3LDM6 I3LDM6 | 2             | 3          | 1          | 1              | 4              | 3              | 2              | 4              | 3          | 44         | 2              | 7              | 59             | 4              | 8                 | 32         | 1.4%       | 3.3%           | 1.1%           | 1.7%           | 4.7%           | 4.5%  | 3.1%  | 4.7%  |
| tr I3LEY6 I3LEY6 | 1             | 1          | 0          | 1              | 1              | 1              | 1              | 3              | 1          | 18         | 0              | 17             | 9              | 2              | 1                 | 9          | 2.9%       | 1.0%           | 0.0%           | 1.0%           | 1.0%           | 1.0%  | 2.0%  | 6.7%  |
| tr K7GKY0 K7GKY0 | 16            | 6          | 6          | 13             | 17             | 8              | 17             | 26             | 38         | 64         | 47             | 63             | 59             | 27             | 125               | 138        | 17.7%      | 6.1%           | 6.5%           | 13.1%          | 14.7%          | 5.9%  | 19.3% | 23.2% |
| tr F1SAG9 F1SAG9 | 3             | 1          | 1          | 2              | 2              | 2              | 2              | 13             | 6          | 3          | 5              | 3              | 3              | 7              | 34                | 79         | 8.9%       | 2.6%           | 5.1%           | 2.6%           | 6.1%           | 2.6%  | 7.6%  | 29.3% |
| tr K7GP49 K7GP49 | 3             | 1          | 1          | 2              | 2              | 2              | 2              | 13             | 6          | 3          | 5              | 3              | 3              | 7              | 34                | 79         | 8.9%       | 2.7%           | 5.2%           | 2.7%           | 6.1%           | 2.7%  | 7.7%  | 29.6% |
| tr F1S890 F1S890 | 2             | 4          | 3          | 4              | 5              | 2              | 4              | 5              | 5          | 48         | 18             | 33             | 37             | 6              | 204               | 173        | 7.2%       | 7.5%           | 8.7%           | 14.2%          | 11.9%          | 4.1%  | 15.4% | 15.7% |
| tr K7GNK3 K7GNK3 | 10            | 5          | 8          | 4              | 5              | 2              | 6              | 11             | 27         | 10         | 52             | 30             | 21             | 2              | 404               | 260        | 29.9%      | 21.2%          | 19.2%          | 17.4%          | 21.2%          | 7.3%  | 21.2% | 32.8% |
| tr F2Z518 F2Z518 | 0             | 2          | 0          | 2              | 2              | 1              | 1              | 0              | 0          | 14         | 0              | 15             | 4              | 1              | 1                 | 0          | 0.0%       | 20.8%          | 0.0%           | 20.8%          | 20.8%          | 8.8%  | 12.0% | 0.0%  |
| Q29315           | 10            | 7          | 5          | 5              | 4              | 3              | 1              | 1              | 43         | 35         | 62             | 69             | 31             | 10             | 1                 | 2          | 59.1%      | 43.5%          | 33.9%          | 16.5%          | 16.5%          | 16.5% | 16.5% | 16.5% |
| tr F1SGG7 F1SGG7 | 2             | 3          | 1          | 1              | 2              | 1              | 2              | 3              | 3          | 44         | 2              | 7              | 57             | 2              | 8                 | 25         | 1.7%       | 4.1%           | 1.4%           | 2.1%           | 2.3%           | 2.1%  | 3.9%  | 4.1%  |
| tr F1SGG4 F1SGG4 | 2             | 3          | 1          | 1              | 2              | 1              | 2              | 3              | 3          | 44         | 2              | 7              | 57             | 2              | 8                 | 25         | 1.8%       | 4.2%           | 1.4%           | 2.2%           | 2.4%           | 2.2%  | 4.0%  | 4.2%  |
| tr F1SGG3 F1SGG3 | 5             | 8          | 1          | 3              | 9              | 3              | 2              | 6              | 6          | 51         | 2              | 11             | 65             | 4              | 8                 | 69         | 4.1%       | 8.3%           | 1.1%           | 5.1%           | 12.1%          | 4.6%  | 3.2%  | 7.3%  |
| tr F1RQH9 F1RQH9 | 16            | 6          | 6          | 12             | 15             | 8              | 17             | 23             | 38         | 64         | 47             | 60             | 56             | 27             | 125               | 124        | 17.7%      | 6.1%           | 6.5%           | 11.4%          | 12.8%          | 5.9%  | 19.3% | 21.3% |
| Q2MIK3           | 4             | 1          | 2          | 2              | 3              | 0              | 5              | 10             | 4          | 1          | 7              | 4              | 3              | 0              | 25                | 84         | 41.8%      | 5.8%           | 13.8%          | 5.8%           | 27.0%          | 0.0%  | 37.6% | 41.3% |
| tr I3LAT7 I3LAT7 | 0             | 1          | 0          | 1              | 0              | 1              | 0              | 0              | 0          | 5          | 0              | 1              | 0              | 6              | 0                 | 0          | 0.0%       | 4.1%           | 0.0%           | 4.1%           | 0.0%           | 0.1%  | 0.0%  | 0.0%  |
| tr I3LUL5 I3LUL5 | 3             | 2          | 3          | 3              | 3              | 2              | 2              | 3              | 7          | 16         | 11             | 13             | 14             | 5              | 3                 | 38         | 6.6%       | 3.4%           | 7.0%           | 5.6%           | 5.6%           | 3.4%  | 3.6%  | 5.0%  |
| tr I3LLY8 I3LLY8 | 4             | 5          | 1          | 1              | 6              | 1              | 2              | 5              | 6          | 48         | 2              | 7              | 66             | 2              | 8                 | 41         | 5.8%       | 8.0%           | 1.3%           | 2.1%           | 8.0%           | 2.1%  | 3.7%  | 5.8%  |
| tr F1SGG6 F1SGG6 | 4             | 6          | 1          | 1              | 6              | 4              | 2              | 5              | 6          | 49         | 2              | 7              | 64             | 5              | 8                 | 41         | 5.1%       | 8.8%           | 1.2%           | 1.8%           | 7.3%           | 6.4%  | 3.3%  | 5.1%  |
| tr F1S5D9 F1S5D9 | 0             | 2          | 0          | 1              | 3              | 1              | 0              | 0              | 0          | 8          | 0              | 1              | 5              | 5              | 0                 | 0          | 0.0%       | 5.6%           | 0.0%           | 5.6%           | 13.3%          | 5.6%  | 0.0%  | 0.0%  |
| tr F1SGG9 F1SGG9 | 4             | 5          | 1          | 1              | 5              | 3              | 2              | 5              | 6          | 48         | 2              | 7              | 63             | 4              | 8                 | 41         | 5.5%       | 7.7%           | 1.3%           | 2.0%           | 6.1%           | 5.2%  | 3.6%  | 5.5%  |
| tr F1RJS2 F1RJS2 | 6             | 2          | 8          | 2              | 5              | 2              | 4              | 11             | 9          | 2          | 32             | 3              | 10             | 2              | 77                | 62         | 15.7%      | 4.5%           | 22.5%          | 3.6%           | 15.7%          | 8.5%  | 11.2% | 22.2% |
| tr F1SGI7 F1SGI7 | 3             | 4          | 1          | 1              | 3              | 3              | 2              | 3              | 5          | 51         | 2              | 7              | 65             | 4              | 8                 | 25         | 3.4%       | 5.4%           | 1.1%           | 1.8%           | 3.9%           | 4.8%  | 3.3%  | 3.4%  |
| tr F1RT62 F1RT62 | 13            | 9          | 1          | 6              | 10             | 8              | 5              | 17             | 32         | 48         | 4              | 26             | 51             | 30             | 166               | 171        | 17.9%      | 9.2%           | 1.8%           | 8.1%           | 11.9%          | 8.8%  | 7.0%  | 17.7% |
| tr F1SNX6 F1SNX6 | 2             | 1          | 0          | 1              | 2              | 1              | 2              | 3              | 4          | 5          | 0              | 7              | 4              | 1              | 52                | 8          | 5.2%       | 2.5%           | 0.0%           | 2.5%           | 5.0%           | 2.5%  | 5.2%  | 6.5%  |
| tr F1SP53 F1SP53 | 1             | 1          | 0          | 1              | 2              | 0              | 1              | 5              | 1          | 2          | 0              | 2              | 2              | 0              | 3                 | 36         | 2.0%       | 1.7%           | 0.0%           | 1.7%           | 4.0%           | 0.0%  | 2.3%  | 7.2%  |
| tr K7GL05 K7GL05 | 1             | 1          | 0          | 1              | 2              | 0              | 1              | 5              | 1          | 2          | 0              | 2              | 2              | 0              | 3                 | 36         | 2.0%       | 1.7%           | 0.0%           | 1.7%           | 4.0%           | 0.0%  | 2.3%  | 7.2%  |
| tr K7GM61 K7GM61 | 1             | 1          | 0          | 1              | 2              | 0              | 1              | 5              | 1          | 2          | 0              | 2              | 2              | 0              | 3                 | 36         | 2.0%       | 1.7%           | 0.0%           | 1.7%           | 4.0%           | 0.0%  | 2.3%  | 7.2%  |
| tr F1RXT2 F1RXT2 | 1             | 2          | 0          | 1              | 1              | 0              | 0              | 0              | 1          | 2          | 0              | 3              | 1              | 0              | 0                 | 0          | 2.4%       | 5.5%           | 0.0%           | 2.7%           | 2.7%           | 0.0%  | 0.0%  | 0.0%  |
| tr I3LKB5 I3LKB5 | 1             | 2          | 0          | 1              | 1              | 0              | 0              | 0              | 1          | 2          | 0              | 3              | 1              | 0              | 0                 | 0          | 2.6%       | 6.0%           |                |                |                |       |       |       |

| Accession        | Sample# | Peptide Count |            |            |                |                |                |                | Spectral Count |            |            |            |                |                |                |                | Sequence Coverage |            |            |            |                |                |                |                |                |
|------------------|---------|---------------|------------|------------|----------------|----------------|----------------|----------------|----------------|------------|------------|------------|----------------|----------------|----------------|----------------|-------------------|------------|------------|------------|----------------|----------------|----------------|----------------|----------------|
|                  |         | Whole Cell    | Whole Cell | Whole Cell | Cilia Fraction | Whole Cell | Whole Cell | Whole Cell | Cilia Fraction    | Whole Cell | Whole Cell | Whole Cell | Cilia Fraction |
|                  |         | 1             | 2          | 6          | 4              | 3              | 5              | 7              | 8              | 1          | 2          | 6          | 4              | 3              | 5              | 7              | 8                 | 1          | 2          | 6          | 4              | 3              | 5              | 7              | 8              |
| tr I3LE39 I3LE39 |         | 3             | 2          | 3          | 3              | 2              | 4              | 2              | 1              | 21         | 13         | 46         | 22             | 11             | 8              | 227            | 1                 | 20.6%      | 17.5%      | 28.6%      | 17.5%          | 11.9%          | 38.1%          | 20.6%          | 11.9%          |
| tr I3LEB6 I3LEB6 |         | 3             | 2          | 3          | 3              | 2              | 4              | 2              | 1              | 21         | 13         | 46         | 22             | 11             | 8              | 227            | 1                 | 19.4%      | 16.4%      | 26.9%      | 16.4%          | 11.2%          | 35.8%          | 19.4%          | 11.2%          |
| tr F1SJY6 F1SJY6 | 16      | 6             | 13         | 5          | 14             | 3              | 12             | 37             | 37             | 41         | 36         | 198        | 40             | 44             | 7              | 63             | 393               | 26.2%      | 4.2%       | 19.1%      | 10.4%          | 12.4%          | 1.7%           | 17.9%          | 41.6%          |
| tr F1RF18 F1RF18 | 0       | 3             | 1          | 2          | 3              | 2              | 1              | 3              | 3              | 0          | 44         | 2          | 25             | 21             | 6              | 26             | 54                | 0.0%       | 4.0%       | 2.5%       | 6.2%           | 4.0%           | 4.0%           | 3.7%           | 8.5%           |
| tr F2Z584 F2Z584 | 3       | 2             | 4          | 3          | 2              | 3              | 2              | 1              | 1              | 21         | 13         | 55         | 22             | 11             | 7              | 227            | 1                 | 20.6%      | 17.5%      | 28.6%      | 17.5%          | 11.9%          | 28.6%          | 20.6%          | 11.9%          |
| tr F2Z580 F2Z580 | 3       | 2             | 4          | 3          | 2              | 3              | 2              | 1              | 1              | 21         | 13         | 55         | 22             | 11             | 7              | 227            | 1                 | 20.6%      | 17.5%      | 28.6%      | 17.5%          | 11.9%          | 28.6%          | 20.6%          | 11.9%          |
| tr F2Z578 F2Z578 | 3       | 2             | 4          | 3          | 2              | 3              | 2              | 1              | 1              | 21         | 13         | 55         | 22             | 11             | 7              | 227            | 1                 | 20.6%      | 17.5%      | 28.6%      | 17.5%          | 11.9%          | 28.6%          | 20.6%          | 11.9%          |
| tr I3LAQ1 I3LAQ1 | 3       | 2             | 4          | 3          | 2              | 3              | 2              | 1              | 1              | 21         | 13         | 55         | 22             | 11             | 7              | 227            | 1                 | 19.4%      | 16.4%      | 26.9%      | 16.4%          | 11.2%          | 26.9%          | 19.4%          | 11.2%          |
| tr F2Z579 F2Z579 | 3       | 2             | 4          | 3          | 2              | 3              | 2              | 1              | 1              | 21         | 13         | 55         | 22             | 11             | 7              | 227            | 1                 | 20.6%      | 17.5%      | 28.6%      | 17.5%          | 11.9%          | 28.6%          | 20.6%          | 11.9%          |
| tr F2Z581 F2Z581 | 3       | 2             | 4          | 3          | 2              | 3              | 2              | 1              | 1              | 21         | 13         | 55         | 22             | 11             | 7              | 227            | 1                 | 20.6%      | 17.5%      | 28.6%      | 17.5%          | 11.9%          | 28.6%          | 20.6%          | 11.9%          |
| tr Q06AS8 Q06AS8 | 6       | 6             | 7          | 7          | 10             | 5              | 16             | 22             | 22             | 11         | 88         | 44         | 51             | 54             | 11             | 522            | 434               | 23.2%      | 11.9%      | 17.2%      | 22.6%          | 32.2%          | 13.3%          | 48.0%          | 53.4%          |
| tr F1SCY2 F1SCY2 | 4       | 2             | 3          | 3          | 3              | 1              | 1              | 1              | 1              | 5          | 19         | 20         | 8              | 18             | 2              | 2              | 4                 | 15.2%      | 3.9%       | 9.1%       | 3.9%           | 6.5%           | 1.8%           | 2.6%           | 2.6%           |
| tr F1RIT1 F1RIT1 | 5       | 1             | 1          | 0          | 2              | 2              | 5              | 17             | 5              | 5          | 1          | 1          | 0              | 3              | 4              | 30             | 90                | 7.2%       | 1.3%       | 1.5%       | 0.0%           | 3.1%           | 1.5%           | 8.6%           | 27.9%          |
| tr I3LF17 I3LF17 | 5       | 1             | 1          | 0          | 2              | 2              | 5              | 13             | 5              | 5          | 1          | 1          | 0              | 3              | 4              | 30             | 65                | 7.2%       | 1.3%       | 1.5%       | 0.0%           | 3.1%           | 1.5%           | 8.6%           | 19.6%          |
| tr F1RLQ9 F1RLQ9 | 4       | 3             | 1          | 2          | 3              | 2              | 0              | 6              | 5              | 5          | 27         | 4          | 22             | 12             | 3              | 0              | 21                | 6.5%       | 4.4%       | 1.4%       | 2.2%           | 3.4%           | 3.1%           | 0.0%           | 10.4%          |
| tr I3LAJ6 I3LAJ6 | 5       | 1             | 4          | 3          | 1              | 0              | 4              | 12             | 6              | 6          | 1          | 9          | 7              | 1              | 0              | 105            | 273               | 30.6%      | 5.3%       | 18.4%      | 15.5%          | 5.3%           | 0.0%           | 31.6%          | 40.3%          |
| tr F2Z5K4 F2Z5K4 | 11      | 10            | 3          | 3          | 9              | 7              | 6              | 10             | 52             | 104        | 16         | 74         | 79             | 24             | 41             | 82             | 57.5%             | 40.9%      | 12.4%      | 10.9%      | 40.9%          | 19.2%          | 38.3%          | 57.0%          |                |
| Q29549           | 8       | 2             | 10         | 2          | 6              | 2              | 5              | 12             | 13             | 2          | 50         | 3          | 12             | 2              | 133            | 80             | 20.0%             | 4.5%       | 26.7%      | 3.6%       | 20.0%          | 8.5%           | 15.5%          | 26.5%          |                |
| tr F1RRP6 F1RRP6 | 13      | 10            | 17         | 6          | 12             | 7              | 13             | 29             | 36             | 25         | 121        | 33         | 26             | 10             | 363            | 385            | 53.7%             | 29.9%      | 57.9%      | 18.6%      | 42.1%          | 24.4%          | 51.1%          | 66.2%          |                |
| tr I3L8J8 I3L8J8 | 5       | 0             | 1          | 2          | 3              | 0              | 2              | 9              | 9              | 0          | 5          | 5          | 5              | 0              | 15             | 42             | 4.9%              | 0.0%       | 1.4%       | 2.3%       | 2.2%           | 0.0%           | 2.6%           | 11.3%          |                |
| tr F2Z5K3 F2Z5K3 | 6       | 5             | 7          | 3          | 7              | 0              | 5              | 11             | 18             | 16         | 28         | 15         | 22             | 0              | 277            | 190            | 28.2%             | 43.7%      | 23.9%      | 33.1%      | 34.5%          | 0.0%           | 35.9%          | 45.1%          |                |
| tr F2Z5J9 F2Z5J9 | 7       | 4             | 3          | 3          | 2              | 0              | 2              | 5              | 11             | 12         | 13         | 14         | 11             | 0              | 10             | 13             | 41.7%             | 22.5%      | 14.2%      | 15.6%      | 19.3%          | 0.0%           | 16.5%          | 28.4%          |                |
| P05027           | 9       | 1             | 7          | 2          | 4              | 3              | 8              | 11             | 22             | 2          | 79         | 8          | 14             | 4              | 361            | 619            | 37.0%             | 7.3%       | 28.7%      | 8.3%       | 19.8%          | 12.5%          | 32.0%          | 32.7%          |                |
| tr I3LL41 I3LL41 | 3       | 2             | 3          | 3          | 2              | 3              | 2              | 1              | 21             | 13         | 46         | 22         | 11             | 3              | 227            | 1              | 20.2%             | 17.1%      | 27.9%      | 17.1%      | 11.6%          | 31.8%          | 20.2%          | 11.6%          |                |
| tr J9JIL3 J9JIL3 | 9       | 1             | 7          | 2          | 4              | 2              | 8              | 11             | 22             | 2          | 79         | 8          | 14             | 3              | 361            | 621            | 41.5%             | 8.1%       | 32.2%      | 9.3%       | 22.2%          | 9.3%           | 35.9%          | 36.7%          |                |
| tr F1SSP6 F1SSP6 | 2       | 2             | 1          | 2          | 2              | 2              | 1              | 1              | 8              | 21         | 1          | 16         | 9              | 5              | 9              | 2              | 2.7%              | 2.7%       | 2.7%       | 2.7%       | 2.7%           | 2.7%           | 2.7%           | 2.7%           |                |
| tr F1RYZ0 F1RYZ0 | 20      | 10            | 13         | 5          | 5              | 3              | 2              | 9              | 70             | 38         | 132        | 69         | 32             | 10             | 16             | 52             | 97.4%             | 89.6%      | 77.4%      | 16.5%      | 48.7%          | 16.5%          | 30.4%          | 63.5%          |                |
| tr F1SOK1 F1SOK1 | 1       | 2             | 2          | 0          | 5              | 0              | 1              | 1              | 3              | 4          | 30         | 0          | 7              | 0              | 1              | 5              | 2.4%              | 4.0%       | 4.0%       | 0.0%       | 8.4%           | 0.0%           | 2.4%           | 2.4%           |                |
| tr F1STG5 F1STG5 | 4       | 1             | 0          | 1          | 2              | 0              | 1              | 3              | 4              | 1          | 0          | 2          | 3              | 0              | 2              | 6              | 4.4%              | 0.9%       | 0.0%       | 0.6%       | 2.1%           | 0.0%           | 0.9%           | 2.6%           |                |
| tr F1S7W0 F1S7W0 | 3       | 1             | 12         | 1          | 1              | 0              | 4              | 8              | 3              | 2          | 30         | 4          | 1              | 0              | 18             | 26             | 1.9%              | 0.6%       | 17.2%      | 0.6%       | 0.6%           | 0.0%           | 5.2%           | 8.2%           |                |
| tr I3LA58 I3LA58 | 3       | 2             | 1          | 1          | 2              | 0              | 1              | 4              | 3              | 2          | 6          | 2          | 3              | 0              | 2              | 8              | 3.1%              | 2.2%       | 2.4%       | 0.7%       | 2.3%           | 0.0%           | 1.0%           | 6.0%           |                |
| P79382           | 1       | 1             | 0          | 1          | 1              | 0              | 0              | 0              | 1              | 4          | 0          | 4          | 1              | 0              | 0              | 0              | 12.3%             | 7.7%       | 0.0%       | 7.7%       | 7.7%           | 0.0%           | 0.0%           | 0.0%           |                |
| tr F1RXD5 F1RXD5 | 11      | 5             | 1          | 4          | 6              | 1              | 8              | 16             | 24             | 15         | 1          | 20         | 18             | 1              | 59             | 78             | 21.6%             | 10.3%      | 2.6%       | 10.7%      | 12.6%          | 2.1%           | 22.3%          | 33.6%          |                |
| tr F1RUD0 F1RUD0 | 6       | 2             | 2          | 1          | 2              | 1              | 2              | 6              | 19             | 2          | 10         | 9          | 11             | 1              | 148            | 210            | 17.6%             | 9.5%       | 6.5%       | 6.5%       | 9.5%           | 3.0%           | 9.5%           | 17.6%          |                |
| tr K7GLN3 K7GLN3 | 6       | 2             | 2          | 1          | 2              | 1              | 2              | 6              | 19             | 2          | 10         | 9          | 11             | 1              | 148            | 210            | 23.5%             | 12.6%      | 8.7%       | 8.7%       | 12.6%          | 4.0%           | 12.6%          | 23.5%          |                |
| tr F1SCR1 F1SCR1 | 4       | 2             | 4          | 1          | 2              | 2              | 1              | 1              | 7              | 11         | 15         | 2          | 4              | 12             | 6              | 1              | 5.0%              | 1.9%       | 6.5%       | 1.2%       | 2.7%           | 2.7%           | 1.2%           | 1.9%           |                |
| P01025           | 9       | 2             | 0          | 4          | 4              | 0              | 4              | 6              | 12             | 3          | 0          | 6          | 9              | 0              | 16             | 19             | 8.0%              | 2.3%       | 0.0%       | 3.2%       | 3.8%           | 0.0%           | 3.3%           | 6.9%           |                |
| P20735           | 6       | 1             | 2          | 3          | 3              | 0              | 9              | 12             | 10             | 1          | 16         | 7          | 4              | 0              | 243            | 200            | 11.6%             | 3.0%       | 5.1%       | 5.1%       | 7.0%           | 0.0%           | 16.4%          | 18.7%          |                |
| tr I3LCJ5 I3LCJ5 | 3       | 2             | 0          | 3          | 3              | 2              | 1              | 2              | 8              | 3          | 0          | 6          | 3              | 2              | 8              | 2              | 24.5%             | 7.6%       | 0.0%       | 19.5%      | 19.5%          | 5.4%           | 4.3%           | 12.3%          |                |
| tr I3LQG7 I3LQG7 | 1       | 3             | 5          | 1          | 3              | 1              | 1              | 3              | 1              | 8          | 10         | 1          | 7              | 1              | 11             | 12             | 10.4%             | 40.0%      | 34.1%      | 8.1%       | 30.4%          | 12.6%          | 17.0%          | 31.1%          |                |
| tr F1RN68 F1RN68 | 3       | 1             | 3          | 1          | 1              | 0              | 0              | 3              | 4              | 5          | 7          | 6          | 3              | 0              | 0              | 5              | 2.9%              | 0.8%       | 3.9%       | 0.9%       | 0.9%           | 0.0%           | 0.0%           | 5.0%           |                |
| tr I3L8R1 I3L8R1 | 2       | 1             | 1          | 0          | 2              | 0              | 2              | 0              | 2              | 4          | 5          | 0          | 6              | 0              | 2              | 0              | 47.5%             | 21.3%      | 26.2%      | 0.0%       | 21.3%          | 0.0%           | 32.8%          | 0.0%           |                |
| tr I3LKU0 I3LKU0 | 2       | 1             | 3          | 1          | 2              | 0              | 1              | 1              | 3              | 1          | 13         | 2          | 2              | 0              | 3              | 2              | 5.7%              | 5.2%       | 17.2%      | 5.2%       | 10.9%          | 0.0%           | 6.2%           | 6.2%           |                |
| tr F1RT83 F1RT83 | 1       | 0             | 1          | 0          | 1              | 1              | 5              | 9              | 3              | 0          | 5          | 0          | 2              | 1              | 118            | 85             | 7.8%              | 0.0%       | 3.7%       | 0.0%       | 7.8%           | 7.8%           | 25.3%          | 32.8%          |                |
| tr I3LLN4 I3LLN4 | 1       | 0             | 3          | 0          | 0              | 1              | 2              | 6              | 3              | 0          | 5          | 0          | 0              | 3              | 4              | 25             | 2.8%              | 0.0%       | 4.1%       | 0.0%       | 0.0%           | 1.3%           | 2.3%           | 5.8%           |                |
| P18648           | 2       | 1             | 2          | 1          | 1              | 0              | 4              | 3              | 2              | 1          | 19         | 2          | 1              | 0              | 46             | 14             | 11.7%             | 4.9%       | 6.8%       | 4.9%       | 4.9%           | 0.0%           | 17.7%          | 11.7%          |                |
| tr I3L955 I3L955 | 0       | 2             | 3          | 1          | 2              | 0              | 3              | 5              | 0              | 3          | 7          | 1          | 2              | 0              | 8              | 16             | 0.0%              | 2.5%       | 8.8%       | 2.5%       | 2.5%           | 0.0%           | 10.9%          | 13.5%          |                |
| tr I3LI92 I3LI92 | 1       | 2             | 0          | 1          | 1              | 0              | 0              | 1              | 1              | 2          | 0          | 1          | 2              | 0              | 0              | 5              | 9.9%              | 16.1%      | 0.0%       | 6.2%       | 6.2%           | 0.0%           | 0.0%           | 9.9%           |                |
| tr I3LI25 I3LI25 | 1       | 0             | 3          | 0          | 0              | 1              | 1              | 5              | 3              | 0          | 5          | 0          | 0              | 3              | 3              | 15             | 2.7%              | 0.0%       | 3.9%       | 0.0%       | 0.0%           | 1.2%           | 1.2%           | 4.6%           |                |
| tr I3LAA4 I3LAA4 | 2       | 0             | 0          | 1          | 1              | 0              | 0              | 2              | 3              | 0          | 0          | 2          | 1              | 0              | 0              | 2              | 8.1%              | 0.0%       | 0.0%       | 5.7%       | 5.7%           | 0.0%           | 0.0%           | 14.1%          |                |
| tr I3LFK1 I3LFK1 | 1       | 1             | 0          | 1          | 0              | 0              | 0              | 1              | 1              | 2          | 0          | 3          | 0              | 0              | 0              | 1              | 11.4%             | 5.9%       | 0.0%       | 5.9%       | 0.0%           | 0.0%           | 0.0%           | 9.5%           |                |
| tr F1SGG0 F1SGG0 | 0       | 1             | 0          | 1          | 1              | 0              | 0              | 0              | 0              | 3          | 0          | 1          | 2              | 0              | 0              | 0              | 0.0%              | 6.5%       | 0.0%       | 6.5%       | 6.5%           | 0.0%           | 0.0%           | 0.0%           |                |
| tr I3LBD8 I3LBD8 | 2       | 1             | 0          | 1          | 1              | 0              | 0              | 0              | 2              | 1          | 0          | 2          | 1              | 0              | 0              | 0              | 16.3%             | 4.2%       | 0.0%       | 4.2%       | 4.2%           | 0.0%           | 0.0%           | 0.0%           |                |
| tr F1RIV0 F1RIV0 | 1       | 1             | 0          | 0          | 1              | 1              | 0              | 0              | 1              | 2          | 0          | 0          | 2              | 1              | 0              | 0              | 5.7%              | 2.6%       | 0.0%       | 0.0%       | 2.6%           | 2.6%           | 0.0%           | 0.0%           |                |
| tr F1SAT6 F1SAT6 | 1       | 1             | 1          | 1          | 1              | 0              | 0              | 0              | 2              | 1          | 2          | 1          | 2              | 0              | 0              | 0              | 3.7%              | 3.7%       | 3.7%       | 3.7%       | 3.7%           | 0.0%           | 0.0%           | 0.0%           |                |
| tr I3L6B5 I3L6B5 | 1       | 1             | 1          | 0          | 2              | 0              | 0              | 0              | 1              | 2          | 6          | 0          | 3              | 0              | 0              | 0              | 0                 | 1.8%       | 1.8%       | 1.8%       | 0.0%           | 3.7%           | 0.0%           | 0.0%           | 0.0%           |
| tr F1RXF8 F1RXF8 | 1       | 1             | 1          | 0          | 2              | 0              | 0              | 0              | 1              | 2          | 6          | 0          | 3              | 0              | 0              | 0              | 0                 | 1.9%       | 1.9%       | 1.9%       | 0.0%           | 3.9%           | 0.0%           | 0.0%           | 0.0%           |
| tr F1ST88 F1ST88 | 1       | 0             | 0          | 0          | 2              | 0              | 0              | 4              | 2              | 0          | 0          | 0          | 2              | 0              | 0              | 36             | 14.3%             | 0.0%       | 0.0%       | 0.0%       | 22.7%          | 0.0%           | 0.0%           | 28.6%          |                |
| tr P79388 P79388 | 1       | 0             | 2          | 1          | 1              | 0              | 1              | 10             | 2              | 0          | 6          | 1          | 1              | 0              | 7              | 97             | 9.9%              | 0.0%       | 14.6%      | 4.3%       | 4.3%           | 0.0%           | 7.5%           | 53.0%          |                |
| tr F1SM37 F1SM37 | 2       | 0             | 0          | 0          | 1              | 1              | 2              | 4              | 2              | 0          | 0          | 0          | 1              | 1              | 5              | 7              | 3.5%              | 0.0%       | 0.0%       | 0.0%       | 2.2%           | 1.4%           | 3.9%           | 7.1%           |                |
| tr F1SM38 F1SM38 | 2       | 0             | 0          | 0          | 1              | 1              | 2              | 4              | 2              | 0          | 0          | 0          | 1              | 1              | 5              | 7              | 3.6%              | 0.0%       | 0.0%       | 0.0%       | 2.2%           | 1.4%           | 3.9%           | 7.2%           |                |
| tr F2Z5C9 F2Z5C9 | 2       | 0             | 1          | 1</        |                |                |                |                |                |            |            |            |                |                |                |                |                   |            |            |            |                |                |                |                |                |

| Accession                | Sample# | Peptide Count |            |            |                |                |                |                | Spectral Count |            |            |                |                |                |                |                | Sequence Coverage |            |            |                |                |                |                |                |       |
|--------------------------|---------|---------------|------------|------------|----------------|----------------|----------------|----------------|----------------|------------|------------|----------------|----------------|----------------|----------------|----------------|-------------------|------------|------------|----------------|----------------|----------------|----------------|----------------|-------|
|                          |         | Whole Cell    | Whole Cell | Whole Cell | Cilia Fraction | Cilia Fraction | Cilia Fraction | Cilia Fraction | Whole Cell     | Whole Cell | Whole Cell | Cilia Fraction | Whole Cell        | Whole Cell | Whole Cell | Cilia Fraction |       |
|                          |         | 1             | 2          | 6          | 4              | 3              | 5              | 7              | 8              | 1          | 2          | 6              | 4              | 3              | 5              | 7              | 8                 | 1          | 2          | 6              | 4              | 3              | 5              | 7              | 8     |
| tr F1R178 F1R178         |         | 1             | 0          | 0          | 1              | 0              | 0              | 2              | 2              | 1          | 0          | 0              | 1              | 0              | 0              | 13             | 30                | 2.7%       | 0.0%       | 0.0%           | 2.5%           | 0.0%           | 0.0%           | 8.4%           | 8.4%  |
| tr I3L5L9 I3L5L9         |         | 1             | 0          | 0          | 0              | 1              | 0              | 3              | 2              | 1          | 0          | 0              | 0              | 1              | 0              | 27             | 9                 | 5.0%       | 0.0%       | 0.0%           | 0.0%           | 4.5%           | 0.0%           | 19.8%          | 14.0% |
| tr F1RFW5 F1RFW5         |         | 1             | 0          | 0          | 0              | 1              | 0              | 3              | 2              | 1          | 0          | 0              | 0              | 1              | 0              | 27             | 9                 | 5.9%       | 0.0%       | 0.0%           | 0.0%           | 5.4%           | 0.0%           | 23.6%          | 16.7% |
| tr Q767M4 Q767M4         |         | 1             | 0          | 1          | 0              | 0              | 1              | 0              | 8              | 1          | 0          | 3              | 0              | 0              | 1              | 0              | 60                | 3.6%       | 0.0%       | 2.3%           | 0.0%           | 0.0%           | 1.2%           | 0.0%           | 18.1% |
| tr F1S7A4 F1S7A4         |         | 1             | 0          | 3          | 0              | 1              | 0              | 4              | 9              | 1          | 0          | 15             | 0              | 1              | 0              | 19             | 116               | 3.1%       | 0.0%       | 12.1%          | 0.0%           | 5.0%           | 0.0%           | 18.3%          | 33.1% |
| tr I3L876 I3L876         |         | 0             | 1          | 0          | 0              | 1              | 0              | 1              | 0              | 0          | 1          | 0              | 0              | 1              | 0              | 1              | 0                 | 0.0%       | 20.2%      | 0.0%           | 0.0%           | 20.2%          | 0.0%           | 20.2%          | 0.0%  |
| tr I3LLW9 I3LLW9         |         | 1             | 0          | 0          | 0              | 1              | 0              | 0              | 1              | 1          | 0          | 0              | 0              | 1              | 0              | 0              | 1                 | 13.1%      | 0.0%       | 0.0%           | 0.0%           | 13.1%          | 0.0%           | 0.0%           | 13.1% |
| Q29550                   |         | 1             | 0          | 7          | 1              | 0              | 0              | 2              | 8              | 1          | 0          | 21             | 1              | 0              | 0              | 9              | 21                | 4.2%       | 0.0%       | 18.2%          | 1.2%           | 0.0%           | 0.0%           | 5.1%           | 20.7% |
| tr F1RF15 F1RF15         |         | 1             | 0          | 6          | 1              | 0              | 0              | 1              | 7              | 1          | 0          | 18             | 1              | 0              | 0              | 2              | 19                | 5.0%       | 0.0%       | 18.3%          | 1.5%           | 0.0%           | 0.0%           | 3.1%           | 21.4% |
| tr F1RF16 F1RF16         |         | 1             | 0          | 4          | 1              | 0              | 0              | 0              | 5              | 1          | 0          | 14             | 1              | 0              | 0              | 0              | 15                | 8.4%       | 0.0%       | 22.8%          | 2.5%           | 0.0%           | 0.0%           | 0.0%           | 30.2% |
| tr F1SC85 F1SC85         |         | 1             | 0          | 0          | 1              | 0              | 0              | 0              | 0              | 1          | 0          | 0              | 1              | 0              | 0              | 0              | 0                 | 2.2%       | 0.0%       | 0.0%           | 1.4%           | 0.0%           | 0.0%           | 0.0%           | 0.0%  |
| tr I3L5Z3 I3L5Z3         |         | 0             | 1          | 0          | 0              | 1              | 0              | 0              | 0              | 0          | 1          | 0              | 0              | 1              | 0              | 0              | 0                 | 0.0%       | 0.8%       | 0.0%           | 0.0%           | 0.8%           | 0.0%           | 0.0%           | 0.0%  |
| tr F1S4E4 F1S4E4         |         | 0             | 1          | 0          | 1              | 0              | 0              | 0              | 0              | 0          | 1          | 0              | 1              | 0              | 0              | 0              | 0                 | 0.0%       | 1.6%       | 0.0%           | 1.6%           | 0.0%           | 0.0%           | 0.0%           | 0.0%  |
| tr F1SAQ3 F1SAQ3         |         | 1             | 0          | 0          | 0              | 1              | 0              | 0              | 0              | 1          | 0          | 0              | 0              | 1              | 0              | 0              | 0                 | 4.1%       | 0.0%       | 0.0%           | 0.0%           | 5.0%           | 0.0%           | 0.0%           | 0.0%  |
| Reverse_tr F1STN7 F1STN7 |         | 1             | 0          | 0          | 0              | 1              | 0              | 0              | 0              | 1          | 0          | 0              | 0              | 1              | 0              | 0              | 0                 | 4.6%       | 0.0%       | 0.0%           | 0.0%           | 4.6%           | 0.0%           | 0.0%           | 0.0%  |
| tr I3L7Y5 I3L7Y5         |         | 0             | 1          | 0          | 0              | 1              | 0              | 0              | 0              | 0          | 1          | 0              | 0              | 0              | 1              | 0              | 0                 | 0.0%       | 20.4%      | 0.0%           | 0.0%           | 20.4%          | 0.0%           | 0.0%           | 0.0%  |
| tr F1STR4 F1STR4         |         | 1             | 0          | 0          | 0              | 1              | 0              | 0              | 0              | 1          | 0          | 0              | 0              | 1              | 0              | 0              | 0                 | 5.8%       | 0.0%       | 0.0%           | 0.0%           | 2.4%           | 0.0%           | 0.0%           | 0.0%  |
| tr F1RQM9 F1RQM9         |         | 0             | 1          | 0          | 1              | 0              | 0              | 0              | 0              | 0          | 1          | 0              | 1              | 0              | 0              | 0              | 0                 | 0.0%       | 0.4%       | 0.0%           | 0.3%           | 0.0%           | 0.0%           | 0.0%           | 0.0%  |
| tr F1RFG6 F1RFG6         |         | 1             | 0          | 0          | 1              | 0              | 0              | 0              | 0              | 1          | 0          | 0              | 1              | 0              | 0              | 0              | 0                 | 3.2%       | 0.0%       | 0.0%           | 1.2%           | 0.0%           | 0.0%           | 0.0%           | 0.0%  |
| tr F1RKY2 F1RKY2         |         | 0             | 1          | 0          | 0              | 1              | 0              | 0              | 0              | 0          | 1          | 0              | 0              | 1              | 0              | 0              | 0                 | 0.0%       | 2.8%       | 0.0%           | 0.0%           | 2.8%           | 0.0%           | 0.0%           | 0.0%  |
| tr F1S9A6 F1S9A6         |         | 1             | 0          | 0          | 0              | 1              | 0              | 0              | 0              | 1          | 0          | 0              | 0              | 1              | 0              | 0              | 0                 | 1.1%       | 0.0%       | 0.0%           | 0.0%           | 0.9%           | 0.0%           | 0.0%           | 0.0%  |
| tr I3LSQ5 I3LSQ5         |         | 1             | 0          | 0          | 0              | 0              | 1              | 0              | 0              | 1          | 0          | 0              | 0              | 0              | 1              | 0              | 0                 | 11.6%      | 0.0%       | 0.0%           | 0.0%           | 0.0%           | 11.6%          | 0.0%           | 0.0%  |
| tr F1SSX4 F1SSX4         |         | 1             | 0          | 0          | 0              | 1              | 0              | 0              | 0              | 1          | 0          | 0              | 0              | 1              | 0              | 0              | 0                 | 19.8%      | 0.0%       | 0.0%           | 0.0%           | 14.0%          | 0.0%           | 0.0%           | 0.0%  |
| Reverse_tr F1STM4 F1STM4 |         | 1             | 0          | 0          | 0              | 1              | 0              | 0              | 0              | 1          | 0          | 0              | 0              | 1              | 0              | 0              | 0                 | 4.6%       | 0.0%       | 0.0%           | 0.0%           | 4.6%           | 0.0%           | 0.0%           | 0.0%  |
| tr I3L6R7 I3L6R7         |         | 1             | 0          | 0          | 0              | 0              | 1              | 0              | 0              | 1          | 0          | 0              | 0              | 0              | 1              | 0              | 0                 | 4.3%       | 0.0%       | 0.0%           | 0.0%           | 0.0%           | 4.3%           | 0.0%           | 0.0%  |
| Reverse_tr F1SRK1 F1SRK1 |         | 1             | 0          | 0          | 0              | 1              | 0              | 0              | 0              | 1          | 0          | 0              | 0              | 1              | 0              | 0              | 0                 | 1.3%       | 0.0%       | 0.0%           | 0.0%           | 1.3%           | 0.0%           | 0.0%           | 0.0%  |
| tr Q6YT39 Q6YT39         |         | 0             | 1          | 0          | 0              | 1              | 0              | 0              | 0              | 0          | 1          | 0              | 0              | 1              | 0              | 0              | 0                 | 0.0%       | 1.3%       | 0.0%           | 0.0%           | 1.3%           | 0.0%           | 0.0%           | 0.0%  |
| tr F1SUK5 F1SUK5         |         | 0             | 1          | 0          | 0              | 1              | 0              | 0              | 0              | 0          | 1          | 0              | 0              | 1              | 0              | 0              | 0                 | 0.0%       | 0.6%       | 0.0%           | 0.0%           | 1.2%           | 0.0%           | 0.0%           | 0.0%  |
| tr F1RQR3 F1RQR3         |         | 0             | 1          | 0          | 0              | 0              | 1              | 0              | 0              | 0          | 1          | 0              | 0              | 0              | 1              | 0              | 0                 | 0.0%       | 1.0%       | 0.0%           | 0.0%           | 0.0%           | 1.0%           | 0.0%           | 0.0%  |
| P14632                   |         | 0             | 1          | 0          | 0              | 1              | 0              | 0              | 0              | 0          | 1          | 0              | 0              | 0              | 1              | 0              | 0                 | 0.0%       | 1.3%       | 0.0%           | 0.0%           | 1.3%           | 0.0%           | 0.0%           | 0.0%  |
| tr F1S8X7 F1S8X7         |         | 1             | 0          | 1          | 0              | 1              | 0              | 0              | 0              | 1          | 0          | 1              | 0              | 1              | 0              | 0              | 0                 | 1.7%       | 0.0%       | 2.7%           | 0.0%           | 4.0%           | 0.0%           | 0.0%           | 0.0%  |
| tr I3LI22 I3LI22         |         | 0             | 1          | 1          | 0              | 1              | 0              | 0              | 0              | 0          | 1          | 2              | 0              | 1              | 0              | 0              | 0                 | 0.0%       | 0.4%       | 0.6%           | 0.0%           | 0.6%           | 0.0%           | 0.0%           | 0.0%  |
| tr F1SE95 F1SE95         |         | 0             | 1          | 1          | 0              | 1              | 0              | 0              | 0              | 0          | 1          | 2              | 0              | 1              | 0              | 0              | 0                 | 0.0%       | 0.4%       | 0.5%           | 0.0%           | 0.6%           | 0.0%           | 0.0%           | 0.0%  |
| tr I3LSI9 I3LSI9         |         | 1             | 0          | 1          | 0              | 1              | 0              | 0              | 0              | 1          | 0          | 2              | 0              | 1              | 0              | 0              | 0                 | 27.7%      | 0.0%       | 15.4%          | 0.0%           | 35.4%          | 0.0%           | 0.0%           | 0.0%  |
| tr I3LV95 I3LV95         |         | 1             | 0          | 1          | 0              | 0              | 1              | 1              | 0              | 1          | 0          | 11             | 0              | 0              | 1              | 2              | 0                 | 8.2%       | 0.0%       | 8.2%           | 0.0%           | 0.0%           | 10.4%          | 8.2%           | 0.0%  |
| tr F1RFJ3 F1RFJ3         |         | 1             | 0          | 1          | 0              | 0              | 1              | 1              | 0              | 1          | 0          | 11             | 0              | 0              | 1              | 2              | 0                 | 8.5%       | 0.0%       | 8.5%           | 0.0%           | 0.0%           | 10.8%          | 8.5%           | 0.0%  |
| tr F1RTQ6 F1RTQ6         |         | 1             | 0          | 1          | 0              | 0              | 1              | 1              | 0              | 1          | 0          | 11             | 0              | 0              | 1              | 2              | 0                 | 8.7%       | 0.0%       | 8.7%           | 0.0%           | 0.0%           | 11.0%          | 8.7%           | 0.0%  |
| tr I3LPX9 I3LPX9         |         | 1             | 0          | 1          | 0              | 1              | 0              | 0              | 0              | 1          | 0          | 3              | 0              | 1              | 0              | 0              | 0                 | 1.4%       | 0.0%       | 1.5%           | 0.0%           | 1.8%           | 0.0%           | 0.0%           | 0.0%  |
| tr D0G7F3 D0G7F3         |         | 1             | 0          | 1          | 0              | 1              | 0              | 0              | 0              | 1          | 0          | 3              | 0              | 1              | 0              | 0              | 0                 | 3.3%       | 0.0%       | 4.1%           | 0.0%           | 6.8%           | 0.0%           | 0.0%           | 0.0%  |
| tr F1RJB1 F1RJB1         |         | 0             | 1          | 1          | 0              | 1              | 0              | 0              | 0              | 0          | 1          | 8              | 0              | 1              | 0              | 0              | 0                 | 0.0%       | 1.8%       | 1.8%           | 0.0%           | 1.1%           | 0.0%           | 0.0%           | 0.0%  |
| tr F1RN44 F1RN44         |         | 1             | 1          | 0          | 1              | 1              | 1              | 0              | 2              | 6          | 33         | 0              | 24             | 7              | 7              | 0              | 37                | 2.4%       | 2.4%       | 0.0%           | 2.4%           | 2.4%           | 0.0%           | 6.1%           | 0.0%  |
| tr I3LCP0 I3LCP0         |         | 2             | 3          | 4          | 1              | 2              | 3              | 3              | 6              | 7          | 50         | 4              | 22             | 19             | 14             | 13             | 68                | 2.3%       | 4.1%       | 4.9%           | 1.3%           | 2.7%           | 2.6%           | 4.1%           | 7.4%  |
| tr F1RU49 F1RU49         |         | 2             | 3          | 4          | 1              | 2              | 3              | 3              | 6              | 7          | 50         | 4              | 22             | 19             | 14             | 13             | 68                | 2.3%       | 4.1%       | 5.0%           | 1.3%           | 2.8%           | 2.7%           | 4.1%           | 7.5%  |
| P05024                   |         | 26            | 11         | 21         | 14             | 14             | 2              | 23             | 44             | 71         | 25         | 142            | 53             | 37             | 2              | 1448           | 1134              | 27.6%      | 11.2%      | 23.4%          | 14.7%          | 15.3%          | 3.2%           | 25.7%          | 34.1% |
| tr I3LS04 I3LS04         |         | 7             | 5          | 5          | 2              | 6              | 1              | 5              | 12             | 12         | 8          | 40             | 8              | 10             | 1              | 89             | 190               | 18.7%      | 12.8%      | 15.3%          | 5.5%           | 21.4%          | 2.5%           | 18.5%          | 29.6% |
| tr F1RHL9 F1RHL9         |         | 3             | 3          | 5          | 1              | 2              | 3              | 5              | 11             | 8          | 50         | 13             | 22             | 19             | 14             | 28             | 141               | 3.5%       | 4.1%       | 6.3%           | 1.3%           | 2.8%           | 2.7%           | 7.0%           | 13.1% |
| tr F1RTQ8 F1RTQ8         |         | 8             | 2          | 5          | 5              | 4              | 1              | 4              | 13             | 11         | 8          | 14             | 10             | 7              | 1              | 12             | 50                | 11.3%      | 1.8%       | 5.2%           | 5.6%           | 5.1%           | 1.0%           | 4.9%           | 13.8% |
| tr I3LV57 I3LV57         |         | 12            | 10         | 3          | 3              | 9              | 7              | 6              | 11             | 79         | 101        | 20             | 71             | 75             | 24             | 74             | 115               | 54.9%      | 40.9%      | 12.4%          | 10.9%          | 40.9%          | 19.2%          | 38.3%          | 63.2% |
| Q29548                   |         | 3             | 4          | 2          | 1              | 1              | 3              | 3              | 3              | 6          | 11         | 5              | 6              | 5              | 5              | 8              | 9                 | 6.6%       | 8.7%       | 3.2%           | 1.9%           | 1.9%           | 6.2%           | 8.3%           | 6.6%  |
| tr D0G6X8 D0G6X8         |         | 3             | 4          | 2          | 1              | 1              | 3              | 3              | 3              | 6          | 11         | 5              | 6              | 5              | 5              | 8              | 9                 | 6.5%       | 8.6%       | 3.2%           | 1.9%           | 1.9%           | 6.1%           | 8.2%           | 6.5%  |
| tr F1RS45 F1RS45         |         | 5             | 2          | 4          | 2              | 3              | 1              | 0              | 0              | 5          | 12         | 23             | 7              | 8              | 1              | 0              | 0                 | 3.8%       | 1.6%       | 3.8%           | 1.7%           | 1.7%           | 0.7%           | 0.0%           | 0.0%  |
| Q007T5                   |         | 4             | 4          | 1          | 2              | 8              | 1              | 5              | 9              | 11         | 5          | 11             | 2              | 12             | 1              | 37             | 55                | 32.0%      | 29.7%      | 12.0%          | 12.0%          | 53.1%          | 11.4%          | 28.0%          | 37.1% |
| P02543                   |         | 33            | 9          | 29         | 10             | 13             | 5              | 13             | 22             | 84         | 70         | 126            | 46             | 80             | 18             | 276            | 207               | 64.2%      | 20.0%      | 45.7%          | 23.2%          | 24.0%          | 9.0%           | 33.9%          | 47.4% |
| Q9MZ15                   |         | 2             | 3          | 11         | 0              | 3              | 7              | 5              | 5              | 9          | 6          | 605            | 0              | 3              | 11             | 45             | 19                | 6.8%       | 10.2%      | 41.2%          | 0.0%           | 10.2%          | 17.3%          | 31.3%          | 31.3% |
| tr F1S2F6 F1S2F6         |         | 2             | 3          | 8          | 0              | 3              | 7              | 4              | 4              | 9          | 6          | 592            | 0              | 3              | 11             | 19             | 13                | 6.8%       | 10.2%      | 30.5%          | 0.0%           | 10.2%          | 17.3%          | 23.4%          | 23.4% |
| tr F1RLM1 F1RLM1         |         | 7             | 1          | 1          | 2              | 2              | 0              | 2              | 2              | 12         | 2          | 3              | 7              | 6              | 0              | 8              | 7                 | 6.2%       | 1.2%       | 0.9%           | 1.8%           | 1.2%           | 0.0%           | 2.0%           | 2.8%  |
| tr F1RRE0 F1RRE0         |         | 6             | 3          | 0          | 2              | 2              | 1              | 0              | 2              | 8          | 6          | 0              | 7              | 5              | 1              | 0              | 3                 | 20.0%      | 7.1%       | 0.0%           | 6.5%           | 6.5%           | 4.0%           | 0.0%           | 9.8%  |
| tr F1SUF2 F1SUF2         |         | 6             | 5          | 21         | 4              | 4              | 5              | 0              | 2              | 14         | 22         | 235            | 9              | 11             | 13             | 0              | 3                 | 10.5%      | 6.5%       | 27.0%          | 4.9%           | 4.9%           | 5.1%           | 0.0%           | 6.4%  |
| tr K7GM45 K7GM45         |         | 7             | 2          | 0          | 3              | 4              | 1              | 8              | 9              | 9          | 12         | 0              | 7              | 9              | 3              | 45             | 50                | 17.0%      | 5.7%       | 0.0%           | 9.8%           | 11.3%          | 2.0%           | 20.5%          | 28.6% |
| tr F1SEK8 F1SEK8         |         | 7             | 2          | 0          | 3              | 4              | 1              | 8              | 8              | 9          | 12         | 0              | 7              | 9              | 3              | 45             | 49                | 16.8%      | 5.7%       | 0.0%           | 9.7%           | 11.1%          | 2.0%           | 20.3%          | 20.1% |
| tr F1S2J6 F1S2J6         |         | 3             | 1          | 0          | 0              | 1              | 3              | 0              | 1              | 6          | 4          | 0              | 0              | 1              | 8              | 0              | 19                | 5.8%       | 1.5%       | 0.0%           | 0.0%           | 1.5%           | 2.3%           | 0.0%           | 1.5%  |
| tr F1SG66 F1SG66         |         | 4             | 4          | 9          | 0              | 3              | 1              | 0              | 0              | 5          | 5          | 46             | 0              | 7              | 2              | 0              | 0                 | 8.0%       | 6.8%       |                |                |                |                |                |       |

| Accession        | Sample# | Peptide Count |            |            |                |                |                |                | Spectral Count |            |            |            |                |                |                |                | Sequence Coverage |            |            |            |                |                |                |                |                |
|------------------|---------|---------------|------------|------------|----------------|----------------|----------------|----------------|----------------|------------|------------|------------|----------------|----------------|----------------|----------------|-------------------|------------|------------|------------|----------------|----------------|----------------|----------------|----------------|
|                  |         | Whole Cell    | Whole Cell | Whole Cell | Cilia Fraction | Whole Cell | Whole Cell | Whole Cell | Cilia Fraction    | Whole Cell | Whole Cell | Whole Cell | Cilia Fraction |
|                  |         | 1             | 2          | 6          | 4              | 3              | 5              | 7              | 8              | 1          | 2          | 6          | 4              | 3              | 5              | 7              | 8                 | 1          | 2          | 6          | 4              | 3              | 5              | 7              | 8              |
| tr F2Z5N6 F2Z5N6 |         | 3             | 1          | 1          | 0              | 2              | 0              | 0              | 0              | 4          | 1          | 4          | 0              | 4              | 0              | 0              | 0                 | 13.1%      | 8.9%       | 7.2%       | 0.0%           | 13.8%          | 0.0%           | 0.0%           | 0.0%           |
| tr I3LB80 I3LB80 |         | 9             | 3          | 4          | 3              | 2              | 1              | 6              | 15             | 16         | 29         | 7          | 21             | 8              | 6              | 97             | 177               | 18.3%      | 6.3%       | 13.0%      | 8.1%           | 5.6%           | 2.6%           | 23.6%          | 29.6%          |
| tr K7GPK0 K7GPK0 |         | 3             | 1          | 1          | 3              | 2              | 1              | 9              | 13             | 4          | 18         | 7          | 8              | 5              | 4              | 123            | 62                | 3.1%       | 1.2%       | 2.3%       | 3.5%           | 5.4%           | 1.2%           | 13.1%          | 17.2%          |
| P80928           |         | 7             | 6          | 3          | 4              | 4              | 3              | 1              | 3              | 61         | 88         | 136        | 61             | 44             | 7              | 14             | 29                | 54.8%      | 57.4%      | 35.7%      | 35.7%          | 35.7%          | 27.8%          | 18.3%          | 36.5%          |
| tr F1SMF4 F1SMF4 |         | 4             | 1          | 1          | 3              | 3              | 1              | 10             | 19             | 6          | 18         | 7          | 8              | 6              | 4              | 180            | 163               | 5.0%       | 0.9%       | 1.8%       | 2.7%           | 6.2%           | 0.9%           | 12.8%          | 20.4%          |
| tr K7GP68 K7GP68 |         | 4             | 1          | 1          | 3              | 3              | 1              | 10             | 19             | 6          | 18         | 7          | 8              | 6              | 4              | 180            | 163               | 4.9%       | 0.9%       | 1.8%       | 2.7%           | 6.1%           | 0.9%           | 12.6%          | 20.1%          |
| tr F1S078 F1S078 |         | 5             | 1          | 3          | 1              | 1              | 0              | 0              | 0              | 8          | 4          | 10         | 4              | 5              | 0              | 0              | 0                 | 24.1%      | 3.2%       | 13.5%      | 3.2%           | 3.2%           | 0.0%           | 0.0%           | 0.0%           |
| tr I3LV17 I3LV17 |         | 6             | 1          | 2          | 2              | 1              | 0              | 2              | 15             | 7          | 1          | 3          | 5              | 1              | 0              | 50             | 239               | 30.2%      | 5.2%       | 10.8%      | 8.5%           | 5.2%           | 0.0%           | 23.6%          | 51.4%          |
| tr F1SGQ0 F1SGQ0 |         | 3             | 3          | 1          | 1              | 2              | 0              | 0              | 0              | 3          | 5          | 5          | 2              | 4              | 0              | 0              | 0                 | 12.5%      | 9.3%       | 6.1%       | 6.1%           | 6.1%           | 0.0%           | 0.0%           | 0.0%           |
| tr F2Z4Z0 F2Z4Z0 |         | 1             | 1          | 2          | 1              | 1              | 0              | 6              | 6              | 3          | 1          | 4          | 2              | 1              | 0              | 51             | 37                | 9.0%       | 7.5%       | 10.4%      | 7.5%           | 7.5%           | 0.0%           | 32.8%          | 32.8%          |
| tr F1CK17 F1CK17 |         | 4             | 0          | 1          | 2              | 1              | 0              | 2              | 10             | 4          | 0          | 2          | 2              | 1              | 0              | 11             | 50                | 4.5%       | 0.0%       | 2.0%       | 1.7%           | 1.7%           | 0.0%           | 2.7%           | 15.6%          |
| tr F1RP57 F1RP57 |         | 2             | 0          | 0          | 1              | 2              | 0              | 1              | 6              | 4          | 0          | 0          | 1              | 2              | 0              | 1              | 27                | 9.4%       | 0.0%       | 0.0%       | 3.0%           | 5.4%           | 0.0%           | 4.1%           | 17.7%          |
| tr F1S0L6 F1S0L6 |         | 2             | 2          | 2          | 1              | 1              | 0              | 1              | 1              | 2          | 2          | 7          | 1              | 2              | 0              | 2              | 5                 | 13.8%      | 9.2%       | 8.1%       | 3.5%           | 3.5%           | 0.0%           | 5.7%           | 5.7%           |
| tr I3L7R0 I3L7R0 |         | 5             | 3          | 1          | 3              | 3              | 2              | 1              | 1              | 12         | 40         | 5          | 16             | 18             | 4              | 4              | 3                 | 13.9%      | 5.2%       | 5.2%       | 5.0%           | 5.2%           | 5.2%           | 2.5%           | 7.3%           |
| tr A5GFU4 A5GFU4 |         | 5             | 1          | 1          | 1              | 4              | 0              | 6              | 11             | 8          | 3          | 2          | 1              | 7              | 0              | 39             | 175               | 30.2%      | 3.1%       | 2.5%       | 3.1%           | 19.5%          | 0.0%           | 22.0%          | 37.7%          |
| tr A5GFU3 A5GFU3 |         | 5             | 1          | 1          | 1              | 4              | 0              | 5              | 11             | 8          | 3          | 2          | 1              | 7              | 0              | 34             | 175               | 25.0%      | 2.6%       | 2.1%       | 2.6%           | 16.1%          | 0.0%           | 15.1%          | 31.2%          |
| P62802           |         | 9             | 6          | 8          | 1              | 5              | 5              | 2              | 1              | 17         | 19         | 78         | 2              | 15             | 9              | 213            | 40                | 53.4%      | 42.7%      | 53.4%      | 11.7%          | 35.0%          | 36.9%          | 23.3%          | 11.7%          |
| tr F1RFV9 F1RFV9 |         | 5             | 2          | 0          | 1              | 2              | 0              | 1              | 3              | 5          | 2          | 0          | 2              | 3              | 0              | 2              | 8                 | 4.5%       | 1.5%       | 0.0%       | 0.6%           | 1.3%           | 0.0%           | 0.9%           | 4.3%           |
| tr F2Z5W6 F2Z5W6 |         | 2             | 2          | 0          | 1              | 1              | 0              | 0              | 1              | 2          | 5          | 0          | 1              | 4              | 0              | 0              | 1                 | 15.5%      | 15.5%      | 0.0%       | 8.1%           | 8.1%           | 0.0%           | 0.0%           | 9.9%           |
| tr F1RK90 F1RK90 |         | 2             | 1          | 1          | 1              | 1              | 1              | 0              | 0              | 2          | 5          | 4          | 3              | 1              | 1              | 0              | 3                 | 2.6%       | 0.7%       | 1.4%       | 0.7%           | 0.7%           | 0.0%           | 0.0%           | 2.6%           |
| tr F2Z4Z4 F2Z4Z4 |         | 1             | 2          | 0          | 1              | 1              | 0              | 0              | 0              | 3          | 4          | 0          | 1              | 4              | 0              | 0              | 0                 | 4.7%       | 7.1%       | 0.0%       | 4.2%           | 4.2%           | 0.0%           | 0.0%           | 0.0%           |
| tr I3LL16 I3LL16 |         | 2             | 1          | 1          | 1              | 1              | 0              | 0              | 0              | 2          | 5          | 5          | 3              | 2              | 0              | 0              | 0                 | 7.7%       | 3.3%       | 5.9%       | 3.3%           | 3.3%           | 0.0%           | 0.0%           | 0.0%           |
| tr A7U5U2 A7U5U2 |         | 7             | 7          | 4          | 2              | 10             | 4              | 3              | 7              | 24         | 48         | 190        | 14             | 31             | 6              | 254            | 148               | 25.3%      | 24.9%      | 20.5%      | 10.9%          | 24.9%          | 24.9%          | 16.6%          | 25.8%          |
| P63053           |         | 7             | 7          | 4          | 2              | 10             | 4              | 3              | 7              | 24         | 48         | 189        | 14             | 31             | 6              | 252            | 148               | 45.3%      | 44.5%      | 36.7%      | 19.5%          | 44.5%          | 44.5%          | 29.7%          | 46.1%          |
| tr F1SGG2 F1SGG2 |         | 42            | 20         | 34         | 3              | 21             | 5              | 10             | 10             | 95         | 86         | 203        | 12             | 108            | 7              | 58             | 62                | 67.9%      | 47.9%      | 46.0%      | 12.5%          | 40.5%          | 11.5%          | 20.4%          | 27.8%          |
| tr F1STW3 F1STW3 |         | 2             | 1          | 1          | 1              | 2              | 0              | 2              | 4              | 2          | 8          | 11         | 3              | 4              | 0              | 114            | 37                | 9.4%       | 4.1%       | 7.9%       | 5.3%           | 9.4%           | 0.0%           | 7.9%           | 21.8%          |
| tr F1SU04 F1SU04 |         | 1             | 3          | 0          | 2              | 2              | 2              | 2              | 7              | 1          | 12         | 0          | 4              | 3              | 2              | 14             | 21                | 2.3%       | 5.3%       | 0.0%       | 3.5%           | 3.5%           | 4.4%           | 14.2%          |                |
| tr I3LG74 I3LG74 |         | 4             | 2          | 0          | 2              | 2              | 0              | 0              | 0              | 11         | 2          | 0          | 4              | 5              | 0              | 0              | 0                 | 22.3%      | 17.3%      | 0.0%       | 9.5%           | 9.5%           | 0.0%           | 0.0%           | 0.0%           |
| P0CG68           |         | 7             | 7          | 4          | 2              | 10             | 4              | 3              | 7              | 24         | 50         | 194        | 14             | 31             | 6              | 263            | 150               | 10.9%      | 10.7%      | 8.8%       | 4.7%           | 10.7%          | 10.7%          | 7.1%           | 11.1%          |
| P02067           |         | 2             | 4          | 0          | 1              | 3              | 2              | 2              | 2              | 11         | 56         | 0          | 2              | 29             | 15             | 434            | 656               | 8.2%       | 15.0%      | 0.0%       | 6.8%           | 15.0%          | 8.2%           | 14.3%          | 14.3%          |
| tr F1RII7 F1RII7 |         | 2             | 4          | 0          | 1              | 3              | 2              | 2              | 2              | 11         | 56         | 0          | 2              | 29             | 15             | 434            | 656               | 8.2%       | 15.0%      | 0.0%       | 6.8%           | 15.0%          | 8.2%           | 14.3%          | 14.3%          |
| Q07717           |         | 4             | 5          | 1          | 2              | 3              | 4              | 0              | 4              | 16         | 51         | 22         | 13             | 21             | 12             | 0              | 12                | 36.4%      | 38.1%      | 10.2%      | 18.6%          | 29.7%          | 38.1%          | 0.0%           | 45.8%          |
| tr F1STS9 F1STS9 |         | 5             | 3          | 3          | 4              | 2              | 0              | 0              | 1              | 9          | 6          | 14         | 6              | 4              | 0              | 0              | 17                | 15.2%      | 6.9%       | 12.5%      | 8.5%           | 4.5%           | 0.0%           | 0.0%           | 5.3%           |
| tr I3LIK6 I3LIK6 |         | 8             | 5          | 6          | 4              | 5              | 2              | 3              | 7              | 20         | 46         | 74         | 22             | 11             | 11             | 28             | 37                | 37.2%      | 20.9%      | 30.6%      | 10.9%          | 15.9%          | 7.0%           | 15.5%          | 42.6%          |
| tr K7GPM6 K7GPM6 |         | 2             | 1          | 1          | 1              | 1              | 0              | 0              | 2              | 6          | 6          | 9          | 3              | 5              | 0              | 0              | 3                 | 11.9%      | 4.2%       | 4.0%       | 4.2%           | 4.2%           | 0.0%           | 0.0%           | 9.9%           |
| tr F1RUX1 F1RUX1 |         | 7             | 0          | 2          | 0              | 2              | 0              | 1              | 9              | 9          | 0          | 14         | 0              | 6              | 0              | 6              | 61                | 16.3%      | 0.0%       | 5.2%       | 0.0%           | 4.0%           | 0.0%           | 4.0%           | 17.7%          |
| tr F1S81 F1S81   |         | 2             | 1          | 0          | 0              | 2              | 1              | 2              | 1              | 6          | 3          | 0          | 0              | 4              | 2              | 4              | 2                 | 19.6%      | 11.2%      | 0.0%       | 0.0%           | 19.6%          | 11.2%          | 8.4%           | 8.4%           |
| tr I3LD72 I3LD72 |         | 3             | 1          | 1          | 1              | 3              | 0              | 0              | 2              | 4          | 5          | 1          | 2              | 4              | 0              | 0              | 4                 | 10.5%      | 2.0%       | 1.7%       | 2.0%           | 6.1%           | 0.0%           | 0.0%           | 3.9%           |
| tr I3LQU0 I3LQU0 |         | 4             | 3          | 0          | 1              | 1              | 0              | 0              | 0              | 6          | 3          | 0          | 5              | 1              | 0              | 0              | 0                 | 29.2%      | 16.5%      | 0.0%       | 6.0%           | 6.0%           | 0.0%           | 0.0%           | 0.0%           |
| tr I3LBM1 I3LBM1 |         | 2             | 2          | 2          | 0              | 2              | 1              | 0              | 0              | 5          | 4          | 8          | 0              | 5              | 1              | 0              | 0                 | 5.1%       | 6.0%       | 6.9%       | 0.0%           | 6.0%           | 3.6%           | 0.0%           | 0.0%           |
| tr F1S9L3 F1S9L3 |         | 2             | 2          | 2          | 0              | 2              | 1              | 0              | 0              | 5          | 4          | 8          | 0              | 5              | 1              | 0              | 0                 | 5.1%       | 6.0%       | 6.9%       | 0.0%           | 6.0%           | 3.6%           | 0.0%           | 0.0%           |
| tr I3LVR9 I3LVR9 |         | 2             | 2          | 2          | 0              | 2              | 1              | 0              | 0              | 5          | 4          | 8          | 0              | 5              | 1              | 0              | 0                 | 5.5%       | 6.4%       | 7.3%       | 0.0%           | 6.4%           | 3.8%           | 0.0%           | 0.0%           |
| tr I3LQT4 I3LQT4 |         | 2             | 1          | 2          | 0              | 1              | 0              | 1              | 1              | 5          | 1          | 10         | 0              | 4              | 0              | 1              | 3                 | 8.1%       | 8.6%       | 17.1%      | 0.0%           | 8.6%           | 0.0%           | 8.1%           | 8.1%           |
| tr F1SFC9 F1SFC9 |         | 0             | 1          | 0          | 1              | 1              | 0              | 0              | 0              | 0          | 3          | 0          | 1              | 1              | 0              | 0              | 0                 | 0.0%       | 0.8%       | 0.0%       | 0.8%           | 0.8%           | 0.0%           | 0.0%           | 0.0%           |
| tr F1SCF9 F1SCF9 |         | 1             | 1          | 0          | 1              | 1              | 0              | 0              | 0              | 1          | 2          | 0          | 1              | 1              | 0              | 0              | 0                 | 7.3%       | 4.0%       | 0.0%       | 4.0%           | 4.0%           | 0.0%           | 0.0%           | 0.0%           |
| tr F1SB23 F1SB23 |         | 2             | 1          | 0          | 1              | 1              | 0              | 0              | 0              | 2          | 1          | 0          | 1              | 1              | 0              | 0              | 0                 | 2.3%       | 1.0%       | 0.0%       | 1.0%           | 1.0%           | 0.0%           | 0.0%           | 0.0%           |
| tr I3LLQ0 I3LLQ0 |         | 0             | 1          | 0          | 1              | 1              | 0              | 0              | 0              | 0          | 3          | 0          | 1              | 1              | 0              | 0              | 0                 | 0.0%       | 0.9%       | 0.0%       | 0.9%           | 0.9%           | 0.0%           | 0.0%           | 0.0%           |
| tr K7GPN9 K7GPN9 |         | 0             | 1          | 0          | 1              | 1              | 0              | 0              | 0              | 0          | 3          | 0          | 1              | 1              | 0              | 0              | 0                 | 0.0%       | 0.9%       | 0.0%       | 0.9%           | 0.9%           | 0.0%           | 0.0%           | 0.0%           |
| tr F1REZ2 F1REZ2 |         | 0             | 1          | 0          | 1              | 1              | 0              | 0              | 0              | 0          | 3          | 0          | 1              | 1              | 0              | 0              | 0                 | 0.0%       | 0.4%       | 0.0%       | 0.4%           | 0.4%           | 0.0%           | 0.0%           | 0.0%           |
| P02540           |         | 2             | 0          | 2          | 1              | 0              | 0              | 1              | 0              | 3          | 0          | 8          | 2              | 0              | 0              | 2              | 0                 | 5.3%       | 0.0%       | 4.7%       | 1.9%           | 0.0%           | 0.0%           | 3.2%           | 0.0%           |
| tr F1RTQ5 F1RTQ5 |         | 1             | 1          | 1          | 1              | 0              | 1              | 1              | 0              | 1          | 2          | 11         | 1              | 0              | 1              | 2              | 0                 | 8.7%       | 5.5%       | 8.7%       | 5.5%           | 0.0%           | 11.0%          | 8.7%           | 0.0%           |
| Q8WNW3           |         | 14            | 7          | 3          | 5              | 8              | 2              | 10             | 21             | 41         | 14         | 7          | 12             | 16             | 8              | 43             | 198               | 24.7%      | 13.2%      | 5.4%       | 10.5%          | 15.6%          | 2.7%           | 24.2%          | 41.5%          |
| tr F2Z5U0 F2Z5U0 |         | 11            | 7          | 8          | 2              | 10             | 4              | 3              | 7              | 30         | 48         | 235        | 14             | 31             | 6              | 252            | 148               | 58.3%      | 36.5%      | 50.6%      | 16.0%          | 36.5%          | 36.5%          | 24.4%          | 37.8%          |
| tr I3LS24 I3LS24 |         | 6             | 4          | 3          | 5              | 2              | 0              | 0              | 1              | 10         | 7          | 14         | 7              | 4              | 0              | 0              | 17                | 18.7%      | 9.9%       | 13.3%      | 11.6%          | 4.8%           | 0.0%           | 0.0%           | 5.6%           |
| tr F1S4G6 F1S4G6 |         | 2             | 3          | 0          | 2              | 2              | 1              | 0              | 0              | 4          | 13         | 0          | 5              | 5              | 1              | 0              | 0                 | 11.0%      | 9.8%       | 0.0%       | 9.3%           | 9.3%           | 4.5%           | 0.0%           | 0.0%           |
| tr F1SE55 F1SE55 |         | 7             | 2          | 1          | 2              | 2              | 0              | 2              | 0              | 13         | 26         | 2          | 12             | 13             | 0              | 5              | 0                 | 21.0%      | 7.3%       | 2.3%       | 7.3%           | 7.3%           | 0.0%           | 7.3%           | 0.0%           |
| tr I3L9F5 I3L9F5 |         | 3             | 2          | 0          | 2              | 2              | 1              | 2              | 1              | 3          | 19         | 0          | 7              | 6              | 1              | 9              | 7                 | 8.6%       | 5.7%       | 0.0%       | 5.7%           | 5.7%           | 3.5%           | 9.2%           | 5.7%           |
| tr I3LRA0 I3LRA0 |         | 0             | 1          | 0          | 1              | 1              | 0              | 0              | 0              | 0          | 8          | 0          | 1              | 4              | 0              | 0              | 0                 | 0.0%       | 4.2%       | 0.0%       | 4.2%           | 4.2%           | 0.0%           | 0.0%           | 0.0%           |
| tr I3L9I6 I3L9I6 |         | 3             | 1          | 2          | 1              | 1              | 0              | 0              | 4              | 7          | 6          | 12         | 3              | 5              | 0              | 0              | 11                | 8.4%       | 2.4%       | 7.6%       | 2.4%           | 2.4%           | 0.0%           | 0.0%           | 10.9%          |
| tr F1SCY1 F1SCY1 |         | 6             | 1          | 8          | 0              | 4              | 2              | 0              | 0              | 10         | 3          | 33         | 0              | 6              | 2              | 0              | 0                 | 14.0%      | 2.7%       | 13.4%      | 0.0%           | 7.3%           | 5.5%           | 0.0%           | 0.0%           |
| tr K7GN56 K7GN56 |         | 6             | 1          | 8          | 0              | 4              | 2              | 0              | 0              | 10         | 3          | 33         | 0              | 6              | 2              | 0              | 0                 | 14.0%      | 2.7%       | 13.4%      | 0.0%           | 7.3%           | 5.4%           | 0.0%           | 0.0%           |
| tr F1RQR4 F1RQR4 |         | 18            | 5          | 4          | 3              |                |                |                |                |            |            |            |                |                |                |                |                   |            |            |            |                |                |                |                |                |

| Accession        | Sample# | Peptide Count |            |            |                |                |                | Spectral Count |                |            |            |            |                |                |                | Sequence Coverage |                |            |            |            |                |                |                |                |                |
|------------------|---------|---------------|------------|------------|----------------|----------------|----------------|----------------|----------------|------------|------------|------------|----------------|----------------|----------------|-------------------|----------------|------------|------------|------------|----------------|----------------|----------------|----------------|----------------|
|                  |         | Whole Cell    | Whole Cell | Whole Cell | Cilia Fraction | Whole Cell | Whole Cell | Whole Cell | Cilia Fraction | Cilia Fraction | Cilia Fraction | Cilia Fraction    | Cilia Fraction | Whole Cell | Whole Cell | Whole Cell | Cilia Fraction |
|                  |         | 1             | 2          | 6          | 4              | 3              | 5              | 7              | 8              | 1          | 2          | 6          | 4              | 3              | 5              | 7                 | 8              | 1          | 2          | 6          | 4              | 3              | 5              | 7              | 8              |
| tr F1RTA1 F1RTA1 |         | 15            | 5          | 11         | 4              | 7              | 3              | 14             | 37             | 26         | 17         | 59         | 8              | 13             | 3              | 254               | 627            | 17.4%      | 2.8%       | 10.4%      | 2.0%           | 7.0%           | 2.5%           | 11.8%          | 25.9%          |
| tr F1SLG5 F1SLG5 |         | 10            | 12         | 7          | 2              | 9              | 5              | 3              | 3              | 33         | 37         | 145        | 11             | 18             | 10             | 104               | 26             | 20.4%      | 26.4%      | 13.4%      | 8.2%           | 19.1%          | 10.9%          | 9.1%           | 14.6%          |
| tr F2Z5C1 F2Z5C1 |         | 20            | 12         | 9          | 7              | 11             | 8              | 7              | 5              | 88         | 145        | 135        | 48             | 57             | 24             | 50                | 8              | 58.2%      | 28.9%      | 33.0%      | 24.1%          | 43.2%          | 20.7%          | 32.0%          | 20.7%          |
| tr K7GSF0 K7GSF0 |         | 8             | 3          | 0          | 1              | 1              | 3              | 0              | 8              | 13         | 7          | 0          | 4              | 3              | 4              | 0                 | 77             | 50.0%      | 18.1%      | 0.0%       | 8.0%           | 8.0%           | 18.1%          | 0.0%           | 41.3%          |
| tr F2Z5P1 F2Z5P1 |         | 1             | 3          | 0          | 2              | 2              | 3              | 0              | 2              | 24         | 51         | 0          | 8              | 6              | 27             | 0                 | 9              | 22.8%      | 30.7%      | 0.0%       | 22.8%          | 29.9%          | 25.2%          | 0.0%           | 22.8%          |
| tr I3LP08 I3LP08 |         | 7             | 1          | 7          | 1              | 1              | 1              | 2              | 2              | 16         | 6          | 85         | 3              | 7              | 2              | 24                | 5              | 29.8%      | 6.3%       | 40.5%      | 6.3%           | 6.3%           | 6.3%           | 19.0%          | 6.8%           |
| tr I3L973 I3L973 |         | 6             | 1          | 2          | 1              | 1              | 0              | 1              | 1              | 9          | 2          | 7          | 3              | 3              | 0              | 3                 | 20             | 22.5%      | 4.1%       | 12.0%      | 4.1%           | 4.1%           | 0.0%           | 4.1%           | 4.1%           |
| tr F1SC82 F1SC82 |         | 63            | 26         | 40         | 10             | 22             | 11             | 52             | 77             | 159        | 140        | 294        | 73             | 64             | 25             | 1373              | 1135           | 35.6%      | 13.6%      | 21.4%      | 5.7%           | 13.0%          | 5.6%           | 32.5%          | 41.5%          |
| tr J9JIL5 J9JIL5 |         | 7             | 8          | 1          | 3              | 8              | 5              | 2              | 3              | 79         | 54         | 32         | 19             | 45             | 8              | 46                | 54             | 73.5%      | 73.5%      | 11.2%      | 30.6%          | 73.5%          | 66.3%          | 30.6%          | 26.5%          |
| P31950           |         | 7             | 8          | 1          | 3              | 8              | 5              | 2              | 3              | 79         | 54         | 32         | 19             | 45             | 8              | 46                | 54             | 72.7%      | 72.7%      | 11.1%      | 30.3%          | 72.7%          | 65.7%          | 30.3%          | 26.3%          |
| tr I3LP17 I3LP17 |         | 6             | 2          | 2          | 2              | 1              | 1              | 3              | 7              | 11         | 28         | 3          | 11             | 4              | 6              | 74                | 60             | 15.5%      | 3.2%       | 9.1%       | 6.2%           | 3.2%           | 3.2%           | 13.0%          | 14.6%          |
| tr I3LCB1 I3LCB1 |         | 6             | 2          | 2          | 2              | 1              | 1              | 3              | 7              | 11         | 28         | 3          | 11             | 4              | 6              | 74                | 60             | 14.1%      | 2.9%       | 8.3%       | 5.6%           | 2.9%           | 2.9%           | 11.8%          | 13.3%          |
| tr A5GFU6 A5GFU6 |         | 7             | 1          | 4          | 1              | 4              | 0              | 6              | 14             | 12         | 3          | 6          | 1              | 7              | 0              | 39                | 245            | 32.2%      | 2.6%       | 11.6%      | 2.6%           | 16.4%          | 0.0%           | 18.5%          | 38.5%          |
| tr A5GFU2 A5GFU2 |         | 7             | 1          | 4          | 1              | 4              | 0              | 6              | 14             | 12         | 3          | 6          | 1              | 7              | 0              | 39                | 245            | 19.3%      | 1.6%       | 7.0%       | 1.6%           | 9.8%           | 0.0%           | 11.1%          | 23.1%          |
| P29797           |         | 7             | 1          | 4          | 1              | 4              | 0              | 5              | 14             | 12         | 3          | 6          | 1              | 7              | 0              | 34                | 245            | 30.7%      | 2.5%       | 11.1%      | 2.5%           | 15.6%          | 0.0%           | 14.6%          | 36.8%          |
| tr A5GFU7 A5GFU7 |         | 7             | 1          | 5          | 1              | 4              | 0              | 6              | 16             | 12         | 3          | 9          | 1              | 7              | 0              | 39                | 254            | 30.9%      | 2.5%       | 16.2%      | 2.5%           | 15.7%          | 0.0%           | 17.7%          | 42.0%          |
| tr A5GFU0 A5GFU0 |         | 7             | 1          | 5          | 1              | 4              | 0              | 6              | 16             | 12         | 3          | 9          | 1              | 7              | 0              | 39                | 254            | 12.1%      | 1.0%       | 6.4%       | 1.0%           | 6.2%           | 0.0%           | 7.0%           | 16.5%          |
| tr A5GFU5 A5GFU5 |         | 7             | 1          | 5          | 1              | 4              | 0              | 6              | 16             | 12         | 3          | 9          | 1              | 7              | 0              | 39                | 254            | 31.0%      | 2.5%       | 16.2%      | 2.5%           | 15.7%          | 0.0%           | 17.8%          | 42.1%          |
| tr A5GFT9 A5GFT9 |         | 7             | 1          | 5          | 1              | 4              | 0              | 6              | 15             | 12         | 3          | 9          | 1              | 7              | 0              | 39                | 252            | 11.7%      | 1.0%       | 6.1%       | 1.0%           | 5.9%           | 0.0%           | 6.7%           | 14.4%          |
| tr F1ST01 F1ST01 |         | 12            | 6          | 5          | 4              | 1              | 3              | 2              | 9              | 21         | 32         | 43         | 17             | 6              | 5              | 22                | 49             | 33.3%      | 14.4%      | 12.1%      | 10.0%          | 2.8%           | 11.7%          | 7.8%           | 31.6%          |
| tr F1RWH7 F1RWH7 |         | 4             | 3          | 1          | 1              | 1              | 1              | 0              | 1              | 5          | 16         | 4          | 5              | 1              | 5              | 0                 | 2              | 35.2%      | 18.8%      | 8.5%       | 8.9%           | 8.9%           | 9.9%           | 0.0%           | 10.3%          |
| tr F1RKU4 F1RKU4 |         | 4             | 3          | 1          | 1              | 2              | 1              | 1              | 1              | 15         | 8          | 12         | 3              | 8              | 1              | 4                 | 5              | 23.0%      | 11.8%      | 10.1%      | 7.0%           | 7.0%           | 7.0%           | 7.0%           | 10.1%          |
| P62844           |         | 7             | 4          | 2          | 2              | 3              | 2              | 4              | 4              | 58         | 23         | 32         | 22             | 16             | 4              | 52                | 25             | 55.9%      | 37.2%      | 21.4%      | 15.2%          | 15.2%          | 15.2%          | 36.6%          | 36.6%          |
| Q00772           |         | 9             | 3          | 4          | 3              | 6              | 3              | 3              | 5              | 23         | 64         | 29         | 14             | 27             | 4              | 272               | 132            | 32.5%      | 16.8%      | 20.4%      | 17.8%          | 27.7%          | 16.8%          | 15.7%          | 25.7%          |
| tr K7GQ84 K7GQ84 |         | 2             | 5          | 2          | 0              | 4              | 1              | 1              | 0              | 6          | 25         | 15         | 0              | 15             | 1              | 1                 | 0              | 23.7%      | 65.6%      | 23.7%      | 0.0%           | 61.3%          | 11.8%          | 11.8%          | 0.0%           |
| tr F1SFV8 F1SFV8 |         | 2             | 5          | 2          | 0              | 4              | 1              | 1              | 0              | 6          | 25         | 15         | 0              | 15             | 1              | 1                 | 0              | 19.6%      | 54.5%      | 19.6%      | 0.0%           | 50.9%          | 9.8%           | 9.8%           | 0.0%           |
| tr F2Z5D2 F2Z5D2 |         | 12            | 7          | 12         | 4              | 4              | 3              | 6              | 9              | 42         | 41         | 155        | 21             | 15             | 6              | 55                | 49             | 48.3%      | 23.0%      | 40.7%      | 11.0%          | 11.0%          | 8.1%           | 26.8%          | 43.1%          |
| tr I3LR85 I3LR85 |         | 2             | 1          | 0          | 1              | 1              | 1              | 1              | 2              | 2          | 8          | 0          | 1              | 3              | 1              | 3                 | 2              | 5.9%       | 1.2%       | 0.0%       | 1.2%           | 1.2%           | 1.2%           | 2.2%           | 4.4%           |
| tr I3LSZ5 I3LSZ5 |         | 2             | 1          | 0          | 1              | 1              | 0              | 0              | 0              | 2          | 8          | 0          | 1              | 4              | 0              | 0                 | 0              | 17.5%      | 3.6%       | 0.0%       | 3.6%           | 3.6%           | 0.0%           | 0.0%           | 0.0%           |
| tr K7GMI1 K7GMI1 |         | 1             | 2          | 8          | 1              | 1              | 0              | 0              | 4              | 2          | 8          | 37         | 3              | 2              | 0              | 0                 | 10             | 1.0%       | 3.7%       | 13.8%      | 1.3%           | 1.3%           | 0.0%           | 0.0%           | 7.4%           |
| tr K7GNH3 K7GNH3 |         | 1             | 2          | 8          | 1              | 1              | 0              | 0              | 4              | 2          | 8          | 37         | 3              | 2              | 0              | 0                 | 10             | 0.9%       | 3.4%       | 12.6%      | 1.2%           | 1.2%           | 0.0%           | 0.0%           | 6.8%           |
| tr F1SJ30 F1SJ30 |         | 5             | 1          | 4          | 1              | 1              | 0              | 1              | 2              | 9          | 1          | 43         | 2              | 3              | 0              | 1                 | 4              | 20.1%      | 3.5%       | 17.5%      | 3.5%           | 3.5%           | 0.0%           | 5.0%           | 6.4%           |
| tr K7GPL5 K7GPL5 |         | 2             | 2          | 3          | 1              | 2              | 2              | 1              | 1              | 20         | 40         | 126        | 7              | 19             | 4              | 30                | 2              | 15.1%      | 15.1%      | 15.1%      | 15.1%          | 15.1%          | 15.1%          | 15.1%          | 15.1%          |
| tr F1RRA6 F1RRA6 |         | 4             | 1          | 1          | 1              | 1              | 2              | 0              | 0              | 12         | 10         | 67         | 5              | 4              | 2              | 0                 | 0              | 6.8%       | 3.7%       | 3.7%       | 3.7%           | 3.7%           | 4.9%           | 0.0%           | 0.0%           |
| tr F1SKQ9 F1SKQ9 |         | 4             | 1          | 0          | 1              | 1              | 0              | 0              | 3              | 6          | 2          | 0          | 2              | 2              | 0              | 0                 | 6              | 28.8%      | 7.8%       | 0.0%       | 7.8%           | 7.8%           | 0.0%           | 0.0%           | 36.6%          |
| tr F1SQR1 F1SQR1 |         | 2             | 3          | 0          | 1              | 1              | 0              | 0              | 0              | 2          | 6          | 0          | 2              | 2              | 0              | 0                 | 0              | 14.0%      | 4.5%       | 0.0%       | 4.2%           | 4.2%           | 0.0%           | 0.0%           | 0.0%           |
| tr F1SG50 F1SG50 |         | 2             | 1          | 1          | 0              | 2              | 1              | 0              | 0              | 7          | 1          | 1          | 0              | 3              | 1              | 0                 | 0              | 14.9%      | 14.9%      | 7.0%       | 0.0%           | 14.9%          | 14.9%          | 0.0%           | 0.0%           |
| tr I3LNT6 I3LNT6 |         | 3             | 2          | 1          | 0              | 1              | 0              | 1              | 1              | 4          | 2          | 2          | 0              | 3              | 0              | 6                 | 15             | 3.6%       | 3.6%       | 1.2%       | 0.0%           | 2.1%           | 0.0%           | 1.6%           | 1.6%           |
| tr F1SNQ1 F1SNQ1 |         | 5             | 0          | 3          | 0              | 1              | 1              | 0              | 1              | 6          | 0          | 8          | 0              | 1              | 2              | 0                 | 1              | 8.5%       | 0.0%       | 3.1%       | 0.0%           | 1.8%           | 1.8%           | 0.0%           | 1.4%           |
| tr I3LGH9 I3LGH9 |         | 0             | 1          | 2          | 1              | 1              | 0              | 0              | 0              | 0          | 6          | 7          | 2              | 1              | 0              | 0                 | 0              | 0.0%       | 5.6%       | 16.8%      | 5.6%           | 5.6%           | 0.0%           | 0.0%           | 0.0%           |
| tr F1RNS2 F1RNS2 |         | 0             | 1          | 2          | 1              | 1              | 0              | 0              | 0              | 0          | 6          | 7          | 2              | 1              | 0              | 0                 | 0              | 0.0%       | 4.2%       | 12.7%      | 4.2%           | 4.2%           | 0.0%           | 0.0%           | 0.0%           |
| tr I3LPR3 I3LPR3 |         | 1             | 0          | 0          | 0              | 1              | 0              | 0              | 3              | 4          | 0          | 0          | 0              | 2              | 0              | 0                 | 37             | 11.5%      | 0.0%       | 0.0%       | 0.0%           | 11.5%          | 0.0%           | 0.0%           | 18.6%          |
| tr K7GMI9 K7GMI9 |         | 1             | 0          | 0          | 0              | 1              | 0              | 0              | 3              | 4          | 0          | 0          | 0              | 2              | 0              | 0                 | 37             | 18.8%      | 0.0%       | 0.0%       | 0.0%           | 18.8%          | 0.0%           | 0.0%           | 30.4%          |
| tr F1SL24 F1SL24 |         | 1             | 0          | 0          | 0              | 1              | 0              | 0              | 3              | 4          | 0          | 0          | 0              | 2              | 0              | 0                 | 37             | 12.1%      | 0.0%       | 0.0%       | 0.0%           | 12.1%          | 0.0%           | 0.0%           | 19.5%          |
| tr F1SGI5 F1SGI5 |         | 2             | 1          | 1          | 0              | 0              | 2              | 1              | 1              | 3          | 1          | 2          | 0              | 0              | 2              | 6                 | 15             | 4.9%       | 4.9%       | 3.8%       | 0.0%           | 0.0%           | 9.8%           | 4.9%           | 4.9%           |
| tr F1RPT5 F1RPT5 |         | 2             | 0          | 1          | 1              | 1              | 0              | 1              | 3              | 4          | 0          | 3          | 1              | 1              | 0              | 2                 | 17             | 5.0%       | 0.0%       | 1.3%       | 1.1%           | 1.1%           | 0.0%           | 1.1%           | 6.4%           |
| tr I3L819 I3L819 |         | 0             | 1          | 0          | 1              | 1              | 0              | 1              | 0              | 0          | 4          | 0          | 1              | 1              | 0              | 1                 | 0              | 0.0%       | 4.2%       | 0.0%       | 4.2%           | 4.2%           | 0.0%           | 4.2%           | 0.0%           |
| tr K7GMY8 K7GMY8 |         | 1             | 2          | 0          | 1              | 1              | 0              | 0              | 0              | 1          | 3          | 0          | 1              | 1              | 0              | 0                 | 0              | 5.3%       | 6.8%       | 0.0%       | 3.9%           | 3.9%           | 0.0%           | 0.0%           | 0.0%           |
| tr F1RQ09 F1RQ09 |         | 0             | 1          | 0          | 1              | 1              | 0              | 0              | 0              | 0          | 4          | 0          | 1              | 1              | 0              | 0                 | 0              | 0.0%       | 4.5%       | 0.0%       | 4.5%           | 4.5%           | 0.0%           | 0.0%           | 0.0%           |
| tr F1S8C6 F1S8C6 |         | 1             | 2          | 0          | 1              | 1              | 0              | 0              | 0              | 1          | 3          | 0          | 1              | 1              | 0              | 0                 | 0              | 3.8%       | 5.0%       | 0.0%       | 2.9%           | 2.9%           | 0.0%           | 0.0%           | 0.0%           |
| tr I3LR11 I3LR11 |         | 0             | 2          | 2          | 1              | 1              | 0              | 0              | 1              | 0          | 4          | 9          | 1              | 1              | 0              | 0                 | 2              | 0.0%       | 7.6%       | 6.1%       | 3.4%           | 3.4%           | 0.0%           | 0.0%           | 6.1%           |
| tr I3LD59 I3LD59 |         | 0             | 2          | 2          | 1              | 1              | 0              | 0              | 1              | 0          | 4          | 9          | 1              | 1              | 0              | 0                 | 2              | 0.0%       | 7.2%       | 5.8%       | 3.2%           | 3.2%           | 0.0%           | 0.0%           | 5.8%           |
| tr F1S0J9 F1S0J9 |         | 1             | 1          | 1          | 0              | 2              | 0              | 1              | 1              | 3          | 1          | 24         | 0              | 2              | 0              | 1                 | 5              | 11.8%      | 11.8%      | 11.8%      | 0.0%           | 35.5%          | 0.0%           | 11.8%          | 11.8%          |
| tr F1SE08 F1SE08 |         | 4             | 0          | 2          | 0              | 0              | 2              | 0              | 0              | 4          | 0          | 3          | 0              | 0              | 2              | 0                 | 0              | 12.4%      | 0.0%       | 8.7%       | 0.0%           | 0.0%           | 8.7%           | 0.0%           | 0.0%           |
| tr F1SDZ8 F1SDZ8 |         | 2             | 1          | 1          | 0              | 2              | 0              | 0              | 0              | 3          | 1          | 3          | 0              | 2              | 0              | 0                 | 0              | 12.0%      | 5.0%       | 3.8%       | 0.0%           | 5.0%           | 0.0%           | 0.0%           | 0.0%           |
| tr F1RF93 F1RF93 |         | 0             | 2          | 3          | 1              | 1              | 0              | 0              | 1              | 0          | 4          | 11         | 1              | 1              | 0              | 0                 | 2              | 0.0%       | 7.5%       | 12.1%      | 3.4%           | 3.4%           | 0.0%           | 0.0%           | 6.0%           |
| tr F1SMD7 F1SMD7 |         | 1             | 0          | 0          | 0              | 1              | 0              | 2              | 6              | 2          | 0          | 0          | 0              | 1              | 0              | 8                 | 22             | 7.0%       | 0.0%       | 0.0%       | 0.0%           | 8.4%           | 0.0%           | 15.4%          | 34.4%          |
| tr F1RZL4 F1RZL4 |         | 1             | 0          | 0          | 0              | 0              | 1              | 4              | 2              | 2          | 0          | 0          | 0              | 0              | 1              | 10                | 16             | 2.8%       | 0.0%       | 0.0%       | 0.0%           | 0.0%           | 2.2%           | 8.7%           | 2.8%           |
| tr K7GKE2 K7GKE2 |         | 2             | 0          | 1          | 0              | 0              | 1              | 0              | 10             | 2          | 0          | 5          | 0              | 1              | 0              | 7                 | 75             | 9.4%       | 0.0%       | 7.8%       | 0.0%           | 5.2%           | 0.0%           | 7.5%           | 33.2%          |
| tr K7GSW5 K7GSW5 |         | 2             | 0          | 4          | 0              | 1              | 0              | 2              | 4              | 2          | 0          | 13         | 0              | 1              | 0              | 20                | 22             | 7.8%       | 0.0%       | 18.7%      | 0.0%           | 7.8%           | 0.0%           | 7.8%           | 14.0%          |
| tr F1S8R0 F1S8R0 |         | 1             | 1          | 0          | 0              | 1              | 0              | 0              | 1              | 1          | 1          | 0          | 0              | 1              | 0              | 0                 | 4              | 3.5%       | 3.0%       | 0.0%       | 0.0%           | 3.0%           | 0.0%           | 0.0%           |                |

| Sample#          | Peptide Count |            |            |                |                |                |                | Spectral Count |            |            |                |                |                |                | Sequence Coverage |            |            |                |                |                |                |       |       |       |
|------------------|---------------|------------|------------|----------------|----------------|----------------|----------------|----------------|------------|------------|----------------|----------------|----------------|----------------|-------------------|------------|------------|----------------|----------------|----------------|----------------|-------|-------|-------|
|                  | Whole Cell    | Whole Cell | Whole Cell | Cilia Fraction | Cilia Fraction | Cilia Fraction | Cilia Fraction | Whole Cell     | Whole Cell | Whole Cell | Cilia Fraction | Cilia Fraction | Cilia Fraction | Cilia Fraction | Whole Cell        | Whole Cell | Whole Cell | Cilia Fraction | Cilia Fraction | Cilia Fraction | Cilia Fraction |       |       |       |
|                  | 1             | 2          | 6          | 4              | 3              | 5              | 7              | 8              | 1          | 2          | 6              | 4              | 3              | 5              | 7                 | 8          | 1          | 2              | 6              | 4              | 3              | 5     | 7     | 8     |
| Accession        |               |            |            |                |                |                |                |                |            |            |                |                |                |                |                   |            |            |                |                |                |                |       |       |       |
| O79881           | 2             | 0          | 0          | 0              | 0              | 1              | 0              | 0              | 2          | 0          | 0              | 0              | 0              | 1              | 0                 | 0          | 7.6%       | 0.0%           | 0.0%           | 0.0%           | 0.0%           | 3.5%  | 0.0%  | 0.0%  |
| tr I3LFH3 I3LFH3 | 1             | 1          | 0          | 0              | 1              | 0              | 0              | 0              | 1          | 1          | 0              | 0              | 1              | 0              | 0                 | 0          | 1.9%       | 1.3%           | 0.0%           | 0.0%           | 1.3%           | 0.0%  | 0.0%  | 0.0%  |
| tr I3LCJ1 I3LCJ1 | 1             | 1          | 0          | 0              | 1              | 0              | 0              | 0              | 1          | 1          | 0              | 0              | 1              | 0              | 0                 | 0          | 1.9%       | 1.3%           | 0.0%           | 0.0%           | 1.3%           | 0.0%  | 0.0%  | 0.0%  |
| tr I3L9K8 I3L9K8 | 1             | 1          | 0          | 0              | 1              | 0              | 0              | 0              | 1          | 1          | 0              | 0              | 1              | 0              | 0                 | 0          | 13.0%      | 6.2%           | 0.0%           | 0.0%           | 9.9%           | 0.0%  | 0.0%  | 0.0%  |
| tr I3L8G9 I3L8G9 | 1             | 1          | 0          | 0              | 1              | 0              | 0              | 0              | 1          | 1          | 0              | 0              | 1              | 0              | 0                 | 0          | 4.6%       | 7.1%           | 0.0%           | 0.0%           | 7.1%           | 0.0%  | 0.0%  | 0.0%  |
| tr F1S762 F1S762 | 0             | 1          | 0          | 0              | 1              | 0              | 0              | 0              | 0          | 2          | 0              | 0              | 1              | 0              | 0                 | 0          | 0.0%       | 3.1%           | 0.0%           | 0.0%           | 2.8%           | 0.0%  | 0.0%  | 0.0%  |
| tr F2Z5C5 F2Z5C5 | 2             | 0          | 0          | 1              | 0              | 0              | 0              | 0              | 2          | 0          | 0              | 1              | 0              | 0              | 0                 | 0          | 45.0%      | 0.0%           | 0.0%           | 32.5%          | 0.0%           | 0.0%  | 0.0%  | 0.0%  |
| tr I3LDR1 I3LDR1 | 0             | 1          | 0          | 0              | 1              | 0              | 0              | 0              | 0          | 2          | 0              | 0              | 1              | 0              | 0                 | 0          | 0.0%       | 1.9%           | 0.0%           | 0.0%           | 3.1%           | 0.0%  | 0.0%  | 0.0%  |
| tr I3LSF4 I3LSF4 | 0             | 2          | 0          | 0              | 0              | 1              | 0              | 0              | 0          | 2          | 0              | 0              | 0              | 0              | 1                 | 0          | 0.0%       | 13.7%          | 0.0%           | 0.0%           | 0.0%           | 13.7% | 0.0%  | 0.0%  |
| tr F1RPN4 F1RPN4 | 0             | 1          | 0          | 0              | 1              | 0              | 0              | 0              | 0          | 2          | 0              | 0              | 1              | 0              | 0                 | 0          | 0.0%       | 2.8%           | 0.0%           | 0.0%           | 2.8%           | 0.0%  | 0.0%  | 0.0%  |
| tr F2Z5I4 F2Z5I4 | 0             | 1          | 0          | 0              | 1              | 0              | 0              | 0              | 0          | 2          | 0              | 0              | 1              | 0              | 0                 | 0          | 0.0%       | 5.6%           | 0.0%           | 0.0%           | 7.2%           | 0.0%  | 0.0%  | 0.0%  |
| tr F1RU4Y F1RU4Y | 1             | 1          | 0          | 0              | 1              | 0              | 0              | 0              | 1          | 1          | 0              | 0              | 1              | 0              | 0                 | 0          | 1.8%       | 1.8%           | 0.0%           | 0.0%           | 1.8%           | 0.0%  | 0.0%  | 0.0%  |
| tr F1SMA3 F1SMA3 | 1             | 1          | 0          | 0              | 1              | 0              | 0              | 0              | 1          | 1          | 0              | 0              | 1              | 0              | 0                 | 0          | 3.1%       | 2.4%           | 0.0%           | 0.0%           | 2.3%           | 0.0%  | 0.0%  | 0.0%  |
| tr F1S5Y7 F1S5Y7 | 0             | 1          | 0          | 0              | 1              | 0              | 0              | 0              | 0          | 2          | 0              | 0              | 1              | 0              | 0                 | 0          | 0.0%       | 2.2%           | 0.0%           | 0.0%           | 2.2%           | 0.0%  | 0.0%  | 0.0%  |
| tr F1RY51 F1RY51 | 1             | 1          | 0          | 0              | 1              | 0              | 0              | 0              | 1          | 1          | 0              | 0              | 1              | 0              | 0                 | 0          | 1.7%       | 0.7%           | 0.0%           | 0.0%           | 0.7%           | 0.0%  | 0.0%  | 0.0%  |
| tr I3LGD6 I3LGD6 | 1             | 0          | 0          | 0              | 1              | 0              | 0              | 0              | 2          | 0          | 0              | 0              | 1              | 0              | 0                 | 0          | 7.6%       | 0.0%           | 0.0%           | 0.0%           | 7.6%           | 0.0%  | 0.0%  | 0.0%  |
| tr F1SDY0 F1SDY0 | 0             | 1          | 0          | 0              | 1              | 0              | 0              | 0              | 0          | 2          | 0              | 0              | 1              | 0              | 0                 | 0          | 0.0%       | 2.0%           | 0.0%           | 0.0%           | 3.1%           | 0.0%  | 0.0%  | 0.0%  |
| tr F1RY62 F1RY62 | 1             | 1          | 0          | 1              | 0              | 0              | 0              | 0              | 1          | 1          | 0              | 1              | 0              | 0              | 0                 | 0          | 3.0%       | 3.0%           | 0.0%           | 3.0%           | 0.0%           | 0.0%  | 0.0%  | 0.0%  |
| tr I3LTE2 I3LTE2 | 0             | 1          | 0          | 1              | 0              | 0              | 0              | 0              | 0          | 2          | 0              | 1              | 0              | 0              | 0                 | 0          | 0.0%       | 6.6%           | 0.0%           | 6.6%           | 0.0%           | 0.0%  | 0.0%  | 0.0%  |
| tr F1S1U4 F1S1U4 | 0             | 1          | 0          | 0              | 1              | 0              | 0              | 0              | 0          | 2          | 0              | 0              | 1              | 0              | 0                 | 0          | 0.0%       | 1.5%           | 0.0%           | 0.0%           | 1.5%           | 0.0%  | 0.0%  | 0.0%  |
| tr F1RZ01 F1RZ01 | 1             | 0          | 0          | 1              | 0              | 0              | 0              | 0              | 2          | 0          | 0              | 1              | 0              | 0              | 0                 | 0          | 2.3%       | 0.0%           | 0.0%           | 4.1%           | 0.0%           | 0.0%  | 0.0%  | 0.0%  |
| tr F1SB77 F1SB77 | 2             | 0          | 3          | 0              | 0              | 1              | 0              | 2              | 2          | 0          | 9              | 0              | 0              | 1              | 0                 | 4          | 4.5%       | 0.0%           | 5.4%           | 0.0%           | 0.0%           | 2.5%  | 0.0%  | 8.6%  |
| tr F2Z5V3 F2Z5V3 | 1             | 1          | 3          | 0              | 1              | 0              | 0              | 1              | 1          | 1          | 10             | 0              | 1              | 0              | 0                 | 3          | 9.4%       | 12.5%          | 19.5%          | 0.0%           | 21.9%          | 0.0%  | 0.0%  | 12.5% |
| tr F1S3V5 F1S3V5 | 1             | 0          | 1          | 1              | 0              | 0              | 0              | 0              | 2          | 0          | 1              | 1              | 0              | 0              | 0                 | 0          | 5.8%       | 0.0%           | 5.8%           | 5.8%           | 0.0%           | 0.0%  | 0.0%  | 0.0%  |
| tr F1SN58 F1SN58 | 0             | 1          | 1          | 0              | 0              | 1              | 0              | 0              | 0          | 2          | 2              | 0              | 0              | 1              | 0                 | 0          | 0.0%       | 3.6%           | 3.1%           | 0.0%           | 0.0%           | 3.1%  | 0.0%  | 0.0%  |
| tr F1SN59 F1SN59 | 0             | 1          | 1          | 0              | 0              | 1              | 0              | 0              | 0          | 2          | 2              | 0              | 0              | 1              | 0                 | 0          | 0.0%       | 5.4%           | 4.7%           | 0.0%           | 0.0%           | 4.7%  | 0.0%  | 0.0%  |
| tr F1SN99 F1SN99 | 1             | 1          | 1          | 0              | 1              | 0              | 0              | 0              | 1          | 1          | 3              | 0              | 1              | 0              | 0                 | 0          | 0.6%       | 0.4%           | 0.7%           | 0.0%           | 0.6%           | 0.0%  | 0.0%  | 0.0%  |
| tr F1RTB6 F1RTB6 | 1             | 0          | 1          | 0              | 1              | 0              | 0              | 0              | 2          | 0          | 4              | 0              | 1              | 0              | 0                 | 0          | 7.4%       | 0.0%           | 3.7%           | 0.0%           | 5.3%           | 0.0%  | 0.0%  | 0.0%  |
| tr F1SIR9 F1SIR9 | 2             | 0          | 1          | 0              | 1              | 0              | 0              | 0              | 2          | 0          | 5              | 0              | 1              | 0              | 0                 | 0          | 3.3%       | 0.0%           | 1.8%           | 0.0%           | 1.2%           | 0.0%  | 0.0%  | 0.0%  |
| tr F1SJ68 F1SJ68 | 1             | 1          | 1          | 0              | 1              | 0              | 0              | 0              | 1          | 1          | 5              | 0              | 1              | 0              | 0                 | 0          | 3.1%       | 0.9%           | 1.8%           | 0.0%           | 0.9%           | 0.0%  | 0.0%  | 0.0%  |
| tr F1RWZ4 F1RWZ4 | 1             | 1          | 2          | 0              | 1              | 0              | 0              | 0              | 1          | 1          | 6              | 0              | 1              | 0              | 0                 | 0          | 4.8%       | 4.8%           | 7.6%           | 0.0%           | 4.1%           | 0.0%  | 0.0%  | 0.0%  |
| tr F1SSB4 F1SSB4 | 2             | 0          | 2          | 0              | 1              | 0              | 0              | 0              | 2          | 0          | 11             | 0              | 1              | 0              | 0                 | 0          | 36.5%      | 0.0%           | 20.9%          | 0.0%           | 23.5%          | 0.0%  | 0.0%  | 0.0%  |
| tr F1SIF2 F1SIF2 | 9             | 4          | 5          | 1              | 3              | 1              | 0              | 1              | 16         | 9          | 8              | 6              | 5              | 1              | 0                 | 1          | 28.0%      | 9.5%           | 15.5%          | 4.2%           | 10.6%          | 4.2%  | 0.0%  | 5.7%  |
| tr F1S9K3 F1S9K3 | 2             | 3          | 3          | 2              | 1              | 1              | 1              | 1              | 3          | 18         | 20             | 6              | 3              | 1              | 2                 | 1          | 9.4%       | 11.4%          | 14.3%          | 7.5%           | 3.9%           | 3.9%  | 3.9%  | 3.9%  |
| tr F1SM28 F1SM28 | 4             | 4          | 0          | 1              | 2              | 1              | 0              | 0              | 9          | 8          | 0              | 3              | 4              | 1              | 0                 | 0          | 11.9%      | 17.7%          | 0.0%           | 5.5%           | 5.5%           | 5.5%  | 0.0%  | 0.0%  |
| tr C7AI81 C7AI81 | 19            | 21         | 13         | 5              | 14             | 7              | 5              | 9              | 90         | 169        | 244            | 46             | 57             | 18             | 131               | 255        | 33.7%      | 35.8%          | 21.8%          | 12.7%          | 29.4%          | 15.4% | 12.2% | 28.4% |
| tr I3LS62 I3LS62 | 0             | 3          | 0          | 0              | 0              | 2              | 0              | 0              | 0          | 26         | 0              | 0              | 0              | 12             | 0                 | 0          | 0.0%       | 20.7%          | 0.0%           | 0.0%           | 0.0%           | 13.2% | 0.0%  | 0.0%  |
| tr F1RM08 F1RM08 | 5             | 2          | 3          | 2              | 4              | 0              | 5              | 14             | 11         | 2          | 48             | 2              | 4              | 0              | 21                | 198        | 11.3%      | 5.1%           | 9.3%           | 6.8%           | 7.7%           | 0.0%  | 11.7% | 29.2% |
| tr F2Z501 F2Z501 | 3             | 2          | 1          | 1              | 1              | 1              | 2              | 3              | 13         | 46         | 6              | 14             | 11             | 2              | 64                | 14         | 24.9%      | 12.4%          | 4.5%           | 6.5%           | 6.5%           | 6.5%  | 12.4% | 20.4% |
| Q35915           | 1             | 2          | 0          | 2              | 1              | 1              | 1              | 0              | 8          | 14         | 0              | 3              | 2              | 5              | 2                 | 0          | 6.2%       | 6.2%           | 0.0%           | 6.2%           | 6.2%           | 6.2%  | 6.2%  | 0.0%  |
| tr F1RP54 F1RP54 | 1             | 2          | 0          | 0              | 2              | 1              | 0              | 1              | 1          | 10         | 0              | 0              | 3              | 2              | 0                 | 7          | 1.0%       | 1.0%           | 0.0%           | 0.0%           | 1.0%           | 1.0%  | 0.0%  | 1.0%  |
| tr B6VNT8 B6VNT8 | 22            | 23         | 13         | 5              | 15             | 7              | 5              | 9              | 100        | 174        | 244            | 46             | 58             | 18             | 131               | 255        | 36.6%      | 38.7%          | 21.8%          | 12.7%          | 32.4%          | 15.4% | 12.2% | 28.4% |
| tr I3LFI3 I3LFI3 | 3             | 1          | 2          | 0              | 2              | 2              | 3              | 3              | 7          | 2          | 8              | 0              | 2              | 2              | 29                | 19         | 12.0%      | 4.5%           | 10.6%          | 0.0%           | 10.4%          | 12.0% | 12.3% | 12.3% |
| tr F1SH45 F1SH45 | 0             | 2          | 0          | 1              | 1              | 0              | 0              | 0              | 0          | 9          | 0              | 2              | 2              | 0              | 0                 | 0          | 0.0%       | 2.5%           | 0.0%           | 2.5%           | 2.5%           | 0.0%  | 0.0%  | 0.0%  |
| tr B7NZV3 B7NZV3 | 3             | 1          | 1          | 0              | 2              | 1              | 0              | 0              | 8          | 1          | 1              | 0              | 3              | 1              | 0                 | 0          | 31.4%      | 10.7%          | 5.0%           | 0.0%           | 10.7%          | 10.7% | 0.0%  | 0.0%  |
| P28491           | 33            | 18         | 40         | 1              | 6              | 9              | 7              | 21             | 212        | 981        | 426            | 278            | 173            | 78             | 276               | 323        | 70.7%      | 63.3%          | 59.5%          | 2.6%           | 23.7%          | 15.1% | 26.6% | 59.0% |
| P68137           | 22            | 23         | 13         | 5              | 15             | 6              | 5              | 9              | 100        | 174        | 244            | 46             | 58             | 17             | 131               | 255        | 36.6%      | 38.7%          | 21.8%          | 12.7%          | 32.4%          | 10.9% | 12.2% | 28.4% |
| tr I3LDA8 I3LDA8 | 32            | 18         | 22         | 4              | 10             | 3              | 17             | 24             | 106        | 51         | 169            | 21             | 44             | 4              | 136               | 140        | 31.9%      | 19.0%          | 19.1%          | 3.5%           | 11.9%          | 2.7%  | 21.0% | 32.3% |
| tr I3LMI4 I3LMI4 | 3             | 5          | 1          | 2              | 2              | 1              | 0              | 1              | 17         | 24         | 1              | 6              | 10             | 2              | 0                 | 3          | 35.0%      | 23.1%          | 7.7%           | 12.6%          | 7.7%           | 7.7%  | 0.0%  | 19.6% |
| tr Q52NJ5 Q52NJ5 | 5             | 6          | 1          | 1              | 4              | 0              | 1              | 2              | 17         | 22         | 4              | 8              | 9              | 0              | 11                | 9          | 23.2%      | 27.6%          | 12.2%          | 5.0%           | 35.9%          | 0.0%  | 8.8%  | 18.2% |
| tr F1RR89 F1RR89 | 8             | 3          | 3          | 1              | 1              | 0              | 0              | 1              | 14         | 14         | 13             | 7              | 5              | 0              | 0                 | 2          | 29.9%      | 8.1%           | 10.1%          | 4.2%           | 4.2%           | 0.0%  | 0.0%  | 3.6%  |
| tr A5A780 A5A780 | 3             | 2          | 0          | 0              | 1              | 1              | 1              | 1              | 3          | 4          | 0              | 0              | 1              | 2              | 1                 | 2          | 8.7%       | 3.0%           | 0.0%           | 0.0%           | 5.0%           | 3.0%  | 5.0%  | 5.0%  |
| tr F1RR05 F1RR05 | 0             | 1          | 0          | 1              | 1              | 0              | 0              | 0              | 0          | 7          | 0              | 2              | 1              | 0              | 0                 | 0          | 0.0%       | 6.1%           | 0.0%           | 6.1%           | 9.5%           | 0.0%  | 0.0%  | 0.0%  |
| tr F1SFV7 F1SFV7 | 17            | 13         | 9          | 2              | 11             | 4              | 2              | 5              | 47         | 80         | 267            | 11             | 37             | 6              | 46                | 22         | 83.2%      | 50.5%          | 59.4%          | 19.8%          | 77.2%          | 27.7% | 19.8% | 58.4% |
| tr I3LGD4 I3LGD4 | 43            | 26         | 18         | 8              | 18             | 9              | 13             | 27             | 151        | 179        | 126            | 50             | 71             | 18             | 121               | 163        | 58.0%      | 35.0%          | 17.8%          | 13.4%          | 29.8%          | 14.4% | 27.7% | 47.7% |
| Q95276           | 6             | 7          | 3          | 2              | 3              | 3              | 3              | 3              | 27         | 35         | 213            | 9              | 10             | 7              | 57                | 22         | 39.2%      | 39.2%          | 25.6%          | 14.4%          | 22.4%          | 25.6% | 28.0% | 28.0% |
| tr F2Z5Q2 F2Z5Q2 | 5             | 3          | 1          | 2              | 2              | 1              | 0              | 0              | 16         | 15         | 3              | 6              | 6              | 1              | 0                 | 0          | 23.6%      | 19.1%          | 5.1%           | 10.8%          | 10.8%          | 5.1%  | 0.0%  | 0.0%  |
| tr F1SFV5 F1SFV5 | 12            | 6          | 10         | 0              | 8              | 1              | 1              | 5              | 34         | 14         | 91             | 0              | 19             | 1              | 4                 | 64         | 58.2%      | 57.1%          | 17.3%          | 0.0%           | 39.8%          | 22.4% | 16.3% | 26.5% |
| tr K7GQ95 K7GQ95 | 12            | 6          | 10         | 0              | 8              | 1              | 1              | 5              | 34         | 14         | 91             | 0              | 19             | 1              | 4                 | 64         | 58.8%      | 57.7%          | 17.5%          | 0.0%           | 40.2%          | 22.7% | 16.5% | 26.8% |
| tr K7GLV7 K7GLV7 | 12            | 6          | 10         | 0              | 8              | 1              | 1              | 5              | 34         | 14         | 91             | 0              | 19             | 1              | 4                 | 64         | 46.0%      | 45.2%          | 13.7%          | 0.0%           | 31.5%          | 17.7% | 12.9% | 21.0% |
| tr K7GSS3 K7GSS3 | 2             | 3          | 8          | 1              | 1              | 0              | 0              | 4              | 3          | 9          | 37             | 3              | 2              | 0              | 0                 | 10         | 1.1%       | 1.9%           | 5.3%           | 0.5%           | 0.5%           | 0.0%  | 0.0%  | 2.9%  |
| tr K7GLA8 K7GLA8 | 2             | 3          | 8          | 1              | 1              | 0              | 0              | 4              | 3          | 9          | 37             | 3              | 2              | 0              | 0                 | 10         | 1.6%       | 2.6%           | 7.5%           | 0.7%           | 0.7%           | 0.0%  | 0.0%  | 4.0%  |

| Accession        | Sample# | Peptide Count |            |            |                |                |                |                | Spectral Count |            |            |                |                |                |                |                | Sequence Coverage |            |            |                |                |                |                |                |       |
|------------------|---------|---------------|------------|------------|----------------|----------------|----------------|----------------|----------------|------------|------------|----------------|----------------|----------------|----------------|----------------|-------------------|------------|------------|----------------|----------------|----------------|----------------|----------------|-------|
|                  |         | Whole Cell    | Whole Cell | Whole Cell | Cilia Fraction | Cilia Fraction | Cilia Fraction | Cilia Fraction | Whole Cell     | Whole Cell | Whole Cell | Cilia Fraction | Whole Cell        | Whole Cell | Whole Cell | Cilia Fraction |       |
|                  |         | 1             | 2          | 6          | 4              | 3              | 5              | 7              | 8              | 1          | 2          | 6              | 4              | 3              | 5              | 7              | 8                 | 1          | 2          | 6              | 4              | 3              | 5              | 7              | 8     |
| tr F1RP39 F1RP39 |         | 3             | 3          | 1          | 1              | 2              | 0              | 0              | 0              | 5          | 5          | 4              | 1              | 3              | 0              | 0              | 0                 | 3.1%       | 1.9%       | 0.5%           | 0.5%           | 1.2%           | 0.0%           | 0.0%           | 0.0%  |
| tr K7GN20 K7GN20 |         | 2             | 0          | 0          | 1              | 1              | 0              | 1              | 2              | 5          | 0          | 0              | 1              | 1              | 0              | 1              | 12                | 9.9%       | 0.0%       | 0.0%           | 6.2%           | 6.2%           | 0.0%           | 13.6%          | 9.9%  |
| tr I3LFQ9 I3LFQ9 |         | 1             | 1          | 1          | 1              | 1              | 0              | 1              | 2              | 1          | 4          | 2              | 1              | 1              | 0              | 1              | 4                 | 5.0%       | 5.4%       | 4.1%           | 5.4%           | 5.4%           | 0.0%           | 5.4%           | 7.2%  |
| tr F1SVC7 F1SVC7 |         | 1             | 1          | 1          | 1              | 1              | 0              | 1              | 0              | 1          | 4          | 2              | 1              | 1              | 0              | 1              | 0                 | 5.1%       | 5.5%       | 4.1%           | 5.5%           | 5.5%           | 0.0%           | 5.5%           | 0.0%  |
| tr F1RND0 F1RND0 |         | 1             | 1          | 1          | 0              | 1              | 1              | 0              | 0              | 1          | 4          | 1              | 0              | 1              | 1              | 0              | 0                 | 3.7%       | 5.8%       | 9.9%           | 0.0%           | 5.8%           | 5.8%           | 0.0%           | 0.0%  |
| tr I3LG94 I3LG94 |         | 3             | 2          | 1          | 1              | 0              | 0              | 0              | 0              | 3          | 2          | 1              | 2              | 0              | 0              | 0              | 0                 | 4.9%       | 1.8%       | 1.4%           | 0.9%           | 0.0%           | 0.0%           | 0.0%           | 0.0%  |
| tr I3LHI4 I3LHI4 |         | 3             | 0          | 1          | 0              | 1              | 0              | 0              | 0              | 5          | 0          | 1              | 0              | 2              | 0              | 0              | 0                 | 6.6%       | 0.0%       | 1.2%           | 0.0%           | 1.6%           | 0.0%           | 0.0%           | 0.0%  |
| tr I3LRH3 I3LRH3 |         | 1             | 1          | 1          | 0              | 1              | 1              | 0              | 0              | 1          | 4          | 1              | 0              | 1              | 1              | 0              | 0                 | 3.8%       | 5.8%       | 10.0%          | 0.0%           | 5.8%           | 5.8%           | 0.0%           | 0.0%  |
| tr F1RFP8 F1RFP8 |         | 3             | 0          | 1          | 1              | 1              | 0              | 0              | 0              | 5          | 0          | 3              | 1              | 1              | 0              | 0              | 0                 | 6.5%       | 0.0%       | 0.2%           | 2.2%           | 4.8%           | 0.0%           | 0.0%           | 0.0%  |
| tr F1RGE2 F1RGE2 |         | 2             | 2          | 8          | 1              | 1              | 0              | 0              | 0              | 3          | 2          | 17             | 1              | 1              | 0              | 0              | 0                 | 2.6%       | 3.0%       | 5.7%           | 1.0%           | 1.0%           | 0.0%           | 0.0%           | 0.0%  |
| tr I3LIY8 I3LIY8 |         | 7             | 10         | 2          | 2              | 3              | 3              | 1              | 0              | 13         | 30         | 9              | 3              | 6              | 8              | 4              | 0                 | 47.9%      | 47.5%      | 12.6%          | 10.5%          | 15.5%          | 11.3%          | 10.5%          | 0.0%  |
| tr I3LE12 I3LE12 |         | 7             | 10         | 2          | 2              | 3              | 3              | 1              | 0              | 13         | 30         | 9              | 3              | 6              | 8              | 4              | 0                 | 47.7%      | 47.3%      | 12.6%          | 10.5%          | 15.5%          | 11.3%          | 10.5%          | 0.0%  |
| tr F1RPL2 F1RPL2 |         | 3             | 0          | 1          | 0              | 2              | 0              | 0              | 0              | 1          | 8          | 0              | 10             | 0              | 7              | 0              | 0                 | 31.6%      | 0.0%       | 8.1%           | 0.0%           | 23.5%          | 0.0%           | 0.0%           | 23.5% |
| tr F1S182 F1S182 |         | 25            | 9          | 13         | 2              | 7              | 2              | 3              | 8              | 68         | 74         | 44             | 17             | 32             | 6              | 20             | 22                | 40.4%      | 11.8%      | 17.3%          | 1.3%           | 13.3%          | 4.8%           | 5.5%           | 19.5% |
| tr F1RFY1 F1RFY1 |         | 13            | 10         | 7          | 5              | 4              | 1              | 6              | 6              | 150        | 892        | 472            | 196            | 176            | 30             | 282            | 37                | 67.9%      | 69.3%      | 52.1%          | 47.9%          | 42.1%          | 12.1%          | 48.6%          | 42.9% |
| tr F1SPG9 F1SPG9 |         | 20            | 11         | 7          | 3              | 7              | 2              | 4              | 6              | 44         | 26         | 32             | 8              | 16             | 3              | 15             | 22                | 27.6%      | 13.4%      | 7.7%           | 2.6%           | 10.0%          | 3.9%           | 6.7%           | 9.1%  |
| tr I3LV92 I3LV92 |         | 9             | 9          | 4          | 2              | 5              | 3              | 6              | 7              | 13         | 52         | 27             | 6              | 13             | 6              | 56             | 38                | 37.0%      | 26.5%      | 14.2%          | 7.2%           | 17.5%          | 11.2%          | 24.5%          | 27.0% |
| tr F1SBL1 F1SBL1 |         | 6             | 0          | 6          | 2              | 2              | 0              | 5              | 17             | 13         | 0          | 20             | 3              | 2              | 0              | 28             | 45                | 9.3%       | 0.0%       | 7.3%           | 1.9%           | 3.5%           | 0.0%           | 10.6%          | 24.1% |
| Q1W674           |         | 6             | 4          | 5          | 1              | 2              | 1              | 0              | 0              | 7          | 6          | 12             | 2              | 2              | 1              | 0              | 0                 | 8.2%       | 5.8%       | 5.9%           | 1.2%           | 3.4%           | 1.2%           | 0.0%           | 0.0%  |
| tr F1S9Y5 F1S9Y5 |         | 5             | 0          | 2          | 1              | 1              | 0              | 0              | 0              | 13         | 0          | 12             | 1              | 4              | 0              | 0              | 0                 | 15.1%      | 0.0%       | 3.2%           | 3.0%           | 3.0%           | 0.0%           | 0.0%           | 0.0%  |
| tr I3LM80 I3LM80 |         | 8             | 7          | 1          | 0              | 4              | 4              | 1              | 1              | 23         | 24         | 3              | 0              | 6              | 12             | 5              | 7                 | 20.3%      | 15.7%      | 2.9%           | 0.0%           | 9.7%           | 7.9%           | 3.7%           | 3.7%  |
| tr I3L7Z6 I3L7Z6 |         | 4             | 6          | 3          | 1              | 3              | 3              | 1              | 2              | 23         | 61         | 126            | 7              | 20             | 5              | 30             | 4                 | 26.7%      | 26.7%      | 12.2%          | 12.2%          | 16.7%          | 23.3%          | 12.2%          | 22.2% |
| tr K7GQK6 K7GQK6 |         | 2             | 1          | 3          | 0              | 2              | 2              | 0              | 3              | 2          | 19         | 7              | 0              | 3              | 5              | 0              | 7                 | 26.4%      | 3.8%       | 14.5%          | 0.0%           | 20.4%          | 3.8%           | 0.0%           | 12.8% |
| P67872           |         | 2             | 1          | 3          | 0              | 2              | 2              | 0              | 3              | 2          | 19         | 7              | 0              | 3              | 5              | 0              | 7                 | 28.8%      | 4.2%       | 15.8%          | 0.0%           | 22.3%          | 4.2%           | 0.0%           | 14.0% |
| tr I3L6Y6 I3L6Y6 |         | 30            | 11         | 14         | 3              | 10             | 2              | 5              | 10             | 80         | 83         | 34             | 19             | 37             | 6              | 22             | 32                | 42.8%      | 14.4%      | 16.7%          | 2.4%           | 15.0%          | 4.2%           | 8.5%           | 20.8% |
| tr F2Z5D4 F2Z5D4 |         | 21            | 7          | 11         | 1              | 1              | 1              | 1              | 4              | 43         | 29         | 35             | 15             | 10             | 2              | 3              | 10                | 37.0%      | 16.9%      | 22.2%          | 1.6%           | 1.6%           | 1.6%           | 2.1%           | 15.2% |
| tr F1S2E2 F1S2E2 |         | 7             | 2          | 11         | 1              | 4              | 0              | 8              | 11             | 14         | 2          | 214            | 1              | 5              | 0              | 81             | 213               | 16.7%      | 5.2%       | 21.7%          | 2.0%           | 8.4%           | 0.0%           | 17.5%          | 17.1% |
| tr K7GLW0 K7GLW0 |         | 1             | 3          | 1          | 0              | 1              | 0              | 0              | 0              | 1          | 7          | 1              | 0              | 3              | 0              | 0              | 0                 | 3.9%       | 8.1%       | 2.6%           | 0.0%           | 5.1%           | 0.0%           | 0.0%           | 0.0%  |
| tr F1S7Z8 F1S7Z8 |         | 3             | 2          | 2          | 0              | 1              | 0              | 0              | 1              | 4          | 4          | 10             | 0              | 3              | 0              | 0              | 1                 | 6.1%       | 4.5%       | 5.2%           | 0.0%           | 3.2%           | 0.0%           | 0.0%           | 3.9%  |
| tr I3LEF8 I3LEF8 |         | 8             | 8          | 7          | 4              | 4              | 1              | 2              | 1              | 10         | 25         | 114            | 8              | 4              | 1              | 7              | 2                 | 28.6%      | 24.8%      | 18.4%          | 12.2%          | 16.7%          | 3.6%           | 8.8%           | 3.6%  |
| tr F1S0V2 F1S0V2 |         | 8             | 3          | 3          | 1              | 3              | 0              | 1              | 5              | 37         | 17         | 26             | 11             | 9              | 0              | 5              | 66                | 57.1%      | 27.6%      | 21.0%          | 10.5%          | 29.5%          | 0.0%           | 10.5%          | 45.7% |
| tr I3L9F7 I3L9F7 |         | 6             | 3          | 0          | 1              | 1              | 2              | 2              | 0              | 14         | 13         | 0              | 3              | 4              | 3              | 10             | 0                 | 21.4%      | 8.5%       | 0.0%           | 3.1%           | 3.1%           | 3.1%           | 7.0%           | 0.0%  |
| tr F1SCY0 F1SCY0 |         | 6             | 3          | 4          | 1              | 3              | 1              | 1              | 1              | 26         | 12         | 24             | 5              | 8              | 1              | 1              | 1                 | 15.6%      | 9.8%       | 7.7%           | 2.4%           | 5.6%           | 2.4%           | 2.4%           | 4.3%  |
| tr F1S6G2 F1S6G2 |         | 7             | 2          | 2          | 1              | 1              | 0              | 0              | 0              | 12         | 7          | 4              | 3              | 4              | 0              | 0              | 0                 | 9.1%       | 2.6%       | 2.8%           | 1.4%           | 1.4%           | 0.0%           | 0.0%           | 0.0%  |
| tr B5APV0 B5APV0 |         | 5             | 2          | 3          | 2              | 1              | 0              | 0              | 0              | 12         | 7          | 9              | 4              | 3              | 0              | 0              | 0                 | 33.8%      | 16.6%      | 30.5%          | 16.6%          | 7.9%           | 0.0%           | 0.0%           | 0.0%  |
| tr F1SKG6 F1SKG6 |         | 3             | 1          | 2          | 0              | 1              | 1              | 2              | 10             | 3          | 8          | 13             | 0              | 3              | 1              | 114            | 86                | 32.9%      | 4.5%       | 13.2%          | 0.0%           | 4.5%           | 3.7%           | 8.6%           | 46.1% |
| tr F1SU12 F1SU12 |         | 10            | 6          | 3          | 4              | 3              | 0              | 2              | 3              | 25         | 22         | 19             | 11             | 6              | 0              | 2              | 6                 | 37.8%      | 17.8%      | 6.8%           | 10.9%          | 8.4%           | 0.0%           | 5.7%           | 15.9% |
| Q99028           |         | 10            | 8          | 1          | 1              | 2              | 2              | 4              | 3              | 19         | 20         | 4              | 3              | 8              | 3              | 26             | 5                 | 60.8%      | 49.5%      | 8.1%           | 14.0%          | 14.0%          | 7.0%           | 33.3%          | 19.9% |
| tr F1S3E0 F1S3E0 |         | 4             | 1          | 2          | 2              | 1              | 1              | 2              | 5              | 6          | 22         | 12             | 5              | 3              | 2              | 8              | 18                | 20.6%      | 4.0%       | 10.5%          | 4.0%           | 4.0%           | 4.0%           | 12.9%          | 24.2% |
| tr F1RTU5 F1RTU5 |         | 5             | 3          | 0          | 1              | 2              | 2              | 1              | 0              | 8          | 23         | 0              | 3              | 5              | 3              | 9              | 0                 | 14.5%      | 6.5%       | 0.0%           | 2.6%           | 6.5%           | 2.6%           | 2.6%           | 0.0%  |
| tr F1RNU9 F1RNU9 |         | 22            | 15         | 15         | 4              | 8              | 4              | 10             | 12             | 161        | 90         | 90             | 39             | 43             | 7              | 60             | 146               | 43.5%      | 26.2%      | 26.2%          | 8.6%           | 14.5%          | 5.6%           | 20.1%          | 29.7% |
| P08059           |         | 23            | 15         | 15         | 4              | 8              | 4              | 10             | 12             | 162        | 90         | 90             | 39             | 43             | 7              | 60             | 146               | 48.9%      | 26.2%      | 26.2%          | 8.6%           | 14.5%          | 5.6%           | 20.1%          | 29.7% |
| tr F1RP05 F1RP05 |         | 6             | 4          | 3          | 1              | 2              | 2              | 2              | 9              | 28         | 23         | 6              | 3              | 7              | 8              | 8              | 18                | 24.8%      | 13.6%      | 11.4%          | 3.6%           | 10.9%          | 10.9%          | 6.1%           | 34.5% |
| tr F1RZH4 F1RZH4 |         | 2             | 0          | 0          | 1              | 0              | 0              | 0              | 1              | 17         | 0          | 0              | 6              | 0              | 0              | 0              | 3                 | 11.3%      | 0.0%       | 0.0%           | 4.8%           | 0.0%           | 0.0%           | 0.0%           | 11.3% |
| tr I3LCB2 I3LCB2 |         | 0             | 1          | 0          | 1              | 1              | 0              | 1              | 0              | 0          | 17         | 0              | 2              | 4              | 0              | 1              | 0                 | 0.0%       | 8.7%       | 0.0%           | 8.7%           | 8.7%           | 0.0%           | 18.0%          | 0.0%  |
| tr I3LIY5 I3LIY5 |         | 4             | 2          | 0          | 1              | 1              | 1              | 0              | 0              | 6          | 14         | 0              | 2              | 4              | 1              | 0              | 0                 | 13.8%      | 4.7%       | 0.0%           | 4.7%           | 4.7%           | 4.7%           | 0.0%           | 0.0%  |
| tr K7GLU6 K7GLU6 |         | 5             | 4          | 2          | 2              | 2              | 0              | 0              | 1              | 9          | 11         | 25             | 3              | 4              | 0              | 0              | 2                 | 9.2%       | 5.1%       | 3.5%           | 2.9%           | 2.9%           | 0.0%           | 0.0%           | 1.3%  |
| tr F1RNU1 F1RNU1 |         | 5             | 4          | 2          | 2              | 2              | 0              | 0              | 1              | 9          | 11         | 25             | 3              | 4              | 0              | 0              | 2                 | 8.3%       | 4.6%       | 3.2%           | 2.6%           | 2.6%           | 0.0%           | 0.0%           | 1.2%  |
| tr F1RU33 F1RU33 |         | 7             | 5          | 5          | 3              | 6              | 3              | 2              | 4              | 15         | 91         | 27             | 13             | 15             | 9              | 40             | 34                | 25.4%      | 15.5%      | 15.8%          | 9.3%           | 18.9%          | 9.3%           | 9.0%           | 16.1% |
| P81693           |         | 2             | 2          | 2          | 1              | 1              | 1              | 1              | 0              | 7          | 16         | 3              | 2              | 5              | 1              | 3              | 0                 | 21.5%      | 15.8%      | 13.9%          | 7.6%           | 7.6%           | 7.6%           | 7.6%           | 0.0%  |
| tr F1SPG2 F1SPG2 |         | 26            | 14         | 16         | 3              | 10             | 4              | 6              | 10             | 89         | 61         | 142            | 13             | 30             | 9              | 47             | 61                | 43.8%      | 30.9%      | 24.5%          | 10.7%          | 18.9%          | 11.2%          | 18.6%          | 26.3% |
| Q9GM80           |         | 26            | 14         | 16         | 3              | 10             | 4              | 6              | 10             | 89         | 61         | 142            | 13             | 30             | 9              | 47             | 61                | 43.8%      | 30.9%      | 24.5%          | 10.7%          | 18.9%          | 11.2%          | 18.6%          | 26.3% |
| tr F1S0J8 F1S0J8 |         | 30            | 23         | 27         | 3              | 15             | 5              | 7              | 12             | 190        | 141        | 219            | 26             | 75             | 12             | 170            | 100               | 61.9%      | 65.1%      | 51.0%          | 6.2%           | 42.6%          | 10.9%          | 22.5%          | 33.9% |
| tr F1SGM3 F1SGM3 |         | 12            | 3          | 9          | 2              | 3              | 2              | 3              | 5              | 67         | 46         | 62             | 13             | 19             | 6              | 39             | 24                | 52.8%      | 11.6%      | 34.0%          | 6.4%           | 15.2%          | 6.4%           | 19.6%          | 30.0% |
| Q86320           |         | 12            | 3          | 9          | 2              | 3              | 2              | 3              | 5              | 67         | 46         | 62             | 13             | 19             | 6              | 39             | 24                | 55.2%      | 12.1%      | 35.6%          | 6.7%           | 15.9%          | 6.7%           | 20.5%          | 31.4% |
| tr K7GRW3 K7GRW3 |         | 13            | 12         | 7          | 1              | 7              | 4              | 2              | 4              | 35         | 78         | 262            | 7              | 25             | 6              | 46             | 21                | 68.9%      | 68.9%      | 59.0%          | 18.0%          | 59.0%          | 45.9%          | 32.8%          | 62.3% |
| tr F1S8P1 F1S8P1 |         | 6             | 2          | 2          | 2              | 1              | 0              | 0              | 2              | 16         | 5          | 4              | 5              | 2              | 0              | 0              | 7                 | 25.9%      | 5.8%       | 7.2%           | 12.6%          | 5.8%           | 0.0%           | 0.0%           | 6.8%  |
| tr I3LB08 I3LB08 |         | 2             | 1          | 1          | 1              | 1              | 0              | 1              | 0              | 2          | 19         | 1              | 5              | 2              | 0              | 4              | 0                 | 18.9%      | 8.4%       | 11.9%          | 8.4%           | 8.4%           | 0.0%           | 8.4%           | 0.0%  |
| tr F1SS24 F1SS24 |         | 11            | 7          | 0          | 1              | 4              | 1              | 1              | 2              | 13         | 8          | 0              | 1              | 4              | 2              | 1              | 2                 | 6.4%       | 2.8%       | 0.0%           | 0.6%           | 3.1%           | 0.5%           | 0.9%           | 1.1%  |
| tr F1RX99 F1RX99 |         | 7             | 3          | 8          | 1              | 1              | 0              | 2              | 5              | 11         | 10         | 105            | 6              | 1              | 0              | 3              | 6                 | 40.8%      | 20.1%      | 67.4%          | 7.6%           | 7.6%           | 0.0%           | 27.7%          | 50.5% |
| tr K7GQ59 K7GQ59 |         | 6             | 2          | 9          | 1              | 3              | 0              | 5              | 9              | 13         | 2          | 179            | 1              | 4              | 0</            |                |                   |            |            |                |                |                |                |                |       |

| Accession        | Sample# | Peptide Count |            |            |                |                |                |                | Spectral Count |            |            |                |                |                |                | Sequence Coverage |            |            |                |                |                |                |       |       |       |
|------------------|---------|---------------|------------|------------|----------------|----------------|----------------|----------------|----------------|------------|------------|----------------|----------------|----------------|----------------|-------------------|------------|------------|----------------|----------------|----------------|----------------|-------|-------|-------|
|                  |         | Whole Cell    | Whole Cell | Whole Cell | Cilia Fraction | Cilia Fraction | Cilia Fraction | Cilia Fraction | Whole Cell     | Whole Cell | Whole Cell | Cilia Fraction | Cilia Fraction | Cilia Fraction | Cilia Fraction | Whole Cell        | Whole Cell | Whole Cell | Cilia Fraction | Cilia Fraction | Cilia Fraction | Cilia Fraction |       |       |       |
|                  |         | 1             | 2          | 6          | 4              | 3              | 5              | 7              | 1              | 2          | 6          | 4              | 3              | 5              | 7              | 1                 | 2          | 6          | 4              | 3              | 5              | 7              | 8     |       |       |
| tr F1SD85 F1SD85 |         | 1             | 2          | 0          | 0              | 1              | 0              | 0              | 0              | 1          | 2          | 0              | 0              | 1              | 0              | 0                 | 3.4%       | 7.3%       | 0.0%           | 0.0%           | 3.4%           | 0.0%           | 0.0%  | 0.0%  |       |
| tr F1RQ06 F1RQ06 |         | 0             | 3          | 0          | 1              | 0              | 0              | 0              | 0              | 0          | 3          | 0              | 1              | 0              | 0              | 0                 | 0.0%       | 8.6%       | 0.0%           | 1.9%           | 0.0%           | 0.0%           | 0.0%  | 0.0%  |       |
| tr I3LA49 I3LA49 |         | 1             | 2          | 0          | 1              | 0              | 0              | 0              | 0              | 1          | 2          | 0              | 1              | 0              | 0              | 0                 | 3.6%       | 6.3%       | 0.0%           | 3.3%           | 0.0%           | 0.0%           | 0.0%  | 0.0%  |       |
| tr C6L245 C6L245 |         | 0             | 1          | 0          | 0              | 1              | 0              | 0              | 0              | 0          | 3          | 0              | 0              | 1              | 0              | 0                 | 0.0%       | 3.2%       | 0.0%           | 0.0%           | 6.1%           | 0.0%           | 0.0%  | 0.0%  |       |
| tr F1SBL4 F1SBL4 |         | 2             | 1          | 0          | 0              | 1              | 0              | 0              | 0              | 2          | 1          | 0              | 0              | 1              | 0              | 0                 | 4.6%       | 2.8%       | 0.0%           | 0.0%           | 1.8%           | 0.0%           | 0.0%  | 0.0%  |       |
| tr I3L8X1 I3L8X1 |         | 3             | 0          | 0          | 1              | 0              | 0              | 0              | 0              | 3          | 0          | 0              | 1              | 0              | 0              | 0                 | 11.3%      | 0.0%       | 0.0%           | 4.5%           | 0.0%           | 0.0%           | 0.0%  | 0.0%  |       |
| tr F1RX97 F1RX97 |         | 3             | 0          | 0          | 0              | 1              | 0              | 0              | 0              | 3          | 0          | 0              | 0              | 1              | 0              | 0                 | 32.3%      | 0.0%       | 0.0%           | 0.0%           | 16.2%          | 0.0%           | 0.0%  | 0.0%  |       |
| tr F1RIR7 F1RIR7 |         | 1             | 0          | 0          | 0              | 0              | 1              | 0              | 0              | 3          | 0          | 0              | 0              | 0              | 1              | 0                 | 4.1%       | 0.0%       | 0.0%           | 0.0%           | 0.0%           | 4.1%           | 0.0%  | 0.0%  |       |
| tr F1RKE9 F1RKE9 |         | 0             | 1          | 0          | 0              | 1              | 0              | 0              | 0              | 0          | 3          | 0              | 0              | 1              | 0              | 0                 | 0.0%       | 2.6%       | 0.0%           | 0.0%           | 4.6%           | 0.0%           | 0.0%  | 0.0%  |       |
| tr I3LSJ2 I3LSJ2 |         | 0             | 1          | 0          | 0              | 1              | 0              | 0              | 0              | 0          | 3          | 0              | 0              | 1              | 0              | 0                 | 0.0%       | 2.2%       | 0.0%           | 0.0%           | 2.2%           | 0.0%           | 0.0%  | 0.0%  |       |
| tr F1S010 F1S010 |         | 0             | 1          | 0          | 0              | 1              | 0              | 0              | 0              | 0          | 3          | 0              | 0              | 1              | 0              | 0                 | 0.0%       | 5.3%       | 0.0%           | 0.0%           | 5.3%           | 0.0%           | 0.0%  | 0.0%  |       |
| tr F1SD35 F1SD35 |         | 1             | 2          | 0          | 0              | 0              | 1              | 0              | 0              | 1          | 2          | 0              | 0              | 0              | 1              | 0                 | 4.0%       | 4.0%       | 0.0%           | 0.0%           | 0.0%           | 2.6%           | 0.0%  | 0.0%  |       |
| tr I3LEE6 I3LEE6 |         | 0             | 1          | 0          | 1              | 0              | 0              | 0              | 0              | 0          | 3          | 0              | 1              | 0              | 0              | 0                 | 0.0%       | 1.9%       | 0.0%           | 1.9%           | 0.0%           | 0.0%           | 0.0%  | 0.0%  |       |
| tr F1RSE6 F1RSE6 |         | 0             | 1          | 1          | 0              | 1              | 0              | 0              | 0              | 0          | 3          | 1              | 0              | 1              | 0              | 0                 | 0.0%       | 0.3%       | 0.4%           | 0.0%           | 0.4%           | 0.0%           | 0.0%  | 0.0%  |       |
| tr F1RJN4 F1RJN4 |         | 2             | 1          | 1          | 0              | 1              | 0              | 0              | 0              | 2          | 1          | 1              | 0              | 1              | 0              | 0                 | 8.4%       | 2.9%       | 2.7%           | 0.0%           | 5.4%           | 0.0%           | 0.0%  | 0.0%  |       |
| tr F1RSX1 F1RSX1 |         | 2             | 0          | 1          | 0              | 1              | 0              | 0              | 0              | 3          | 0          | 2              | 0              | 1              | 0              | 0                 | 5.8%       | 0.0%       | 5.8%           | 0.0%           | 5.8%           | 0.0%           | 0.0%  | 0.0%  |       |
| tr F1SOR3 F1SOR3 |         | 3             | 0          | 1          | 0              | 1              | 0              | 0              | 0              | 3          | 0          | 3              | 0              | 1              | 0              | 0                 | 16.0%      | 0.0%       | 5.4%           | 0.0%           | 3.7%           | 0.0%           | 0.0%  | 0.0%  |       |
| tr F1SAS3 F1SAS3 |         | 2             | 1          | 1          | 0              | 0              | 1              | 0              | 0              | 2          | 1          | 7              | 0              | 0              | 1              | 0                 | 14.0%      | 3.0%       | 4.5%           | 0.0%           | 0.0%           | 3.0%           | 0.0%  | 0.0%  |       |
| tr F1RSR8 F1RSR8 |         | 3             | 0          | 2          | 0              | 1              | 0              | 0              | 0              | 3          | 0          | 9              | 0              | 1              | 0              | 0                 | 11.2%      | 0.0%       | 3.3%           | 0.0%           | 2.9%           | 0.0%           | 0.0%  | 0.0%  |       |
| tr I3L9S5 I3L9S5 |         | 1             | 1          | 1          | 0              | 1              | 0              | 0              | 0              | 1          | 2          | 9              | 0              | 1              | 0              | 0                 | 20.5%      | 7.4%       | 20.5%          | 0.0%           | 7.4%           | 0.0%           | 0.0%  | 0.0%  |       |
| tr I3LV02 I3LV02 |         | 20            | 10         | 10         | 4              | 5              | 2              | 2              | 4              | 58         | 112        | 91             | 20             | 30             | 6              | 18                | 28.8%      | 11.3%      | 13.7%          | 3.7%           | 8.9%           | 4.1%           | 2.5%  | 8.9%  |       |
| tr F1RFI2 F1RFI2 |         | 20            | 10         | 10         | 4              | 5              | 2              | 2              | 4              | 58         | 112        | 91             | 20             | 30             | 6              | 18                | 28.8%      | 11.3%      | 13.7%          | 3.7%           | 8.9%           | 4.1%           | 2.5%  | 8.9%  |       |
| tr F1SV93 F1SV93 |         | 7             | 4          | 0          | 1              | 3              | 4              | 2              | 1              | 16         | 33         | 0              | 3              | 6              | 7              | 13                | 21.7%      | 10.8%      | 0.0%           | 2.9%           | 12.7%          | 6.5%           | 6.5%  | 3.7%  |       |
| Q29214           |         | 22            | 19         | 8          | 5              | 6              | 5              | 3              | 4              | 88         | 112        | 132            | 27             | 28             | 10             | 20                | 69.2%      | 62.6%      | 31.1%          | 24.2%          | 32.4%          | 21.7%          | 20.8% | 28.3% |       |
| P19620           |         | 50            | 33         | 34         | 14             | 29             | 8              | 13             | 29             | 535        | 139        | 356            | 47             | 127            | 44             | 706               | 75.2%      | 67.3%      | 57.2%          | 44.0%          | 65.8%          | 23.9%          | 46.0% | 65.5% |       |
| tr F1S073 F1S073 |         | 50            | 33         | 34         | 14             | 29             | 8              | 13             | 29             | 535        | 139        | 356            | 47             | 127            | 44             | 706               | 75.2%      | 67.3%      | 57.2%          | 44.0%          | 65.8%          | 23.9%          | 46.0% | 65.5% |       |
| tr I3LAW4 I3LAW4 |         | 3             | 3          | 0          | 1              | 3              | 1              | 1              | 3              | 14         | 17         | 0              | 4              | 5              | 1              | 4                 | 38.6%      | 27.6%      | 0.0%           | 12.6%          | 27.6%          | 12.6%          | 12.6% | 38.6% |       |
| tr D2IYW4 D2IYW4 |         | 11            | 5          | 11         | 2              | 3              | 1              | 3              | 8              | 30         | 57         | 69             | 17             | 9              | 2              | 33                | 46.6%      | 20.2%      | 38.6%          | 9.7%           | 13.4%          | 4.7%           | 13.7% | 31.4% |       |
| AOPFK7           |         | 11            | 5          | 11         | 2              | 3              | 1              | 3              | 8              | 30         | 57         | 69             | 17             | 9              | 2              | 33                | 46.6%      | 20.2%      | 38.6%          | 9.7%           | 13.4%          | 4.7%           | 13.7% | 31.4% |       |
| tr A9XFX6 A9XFX6 |         | 12            | 5          | 12         | 2              | 3              | 1              | 3              | 10             | 31         | 57         | 71             | 17             | 9              | 2              | 33                | 52.9%      | 20.6%      | 44.5%          | 9.9%           | 13.6%          | 4.8%           | 14.0% | 37.5% |       |
| tr F2Z576 F2Z576 |         | 4             | 1          | 1          | 0              | 2              | 0              | 0              | 1              | 19         | 3          | 10             | 0              | 7              | 0              | 0                 | 38.2%      | 6.6%       | 8.1%           | 0.0%           | 23.5%          | 0.0%           | 0.0%  | 23.5% |       |
| tr F1RZ83 F1RZ83 |         | 5             | 4          | 3          | 1              | 3              | 0              | 1              | 0              | 8          | 14         | 9              | 1              | 6              | 0              | 1                 | 13.1%      | 11.4%      | 7.8%           | 4.6%           | 12.7%          | 0.0%           | 4.6%  | 0.0%  |       |
| tr F1SN33 F1SN33 |         | 5             | 4          | 0          | 1              | 2              | 1              | 1              | 5              | 9          | 32         | 0              | 3              | 5              | 5              | 23                | 6.0%       | 6.0%       | 0.0%           | 1.2%           | 2.8%           | 1.5%           | 3.1%  | 7.9%  |       |
| tr F2Z587 F2Z587 |         | 3             | 2          | 0          | 0              | 2              | 1              | 1              | 1              | 16         | 3          | 0              | 0              | 4              | 2              | 12                | 14.6%      | 20.0%      | 0.0%           | 0.0%           | 21.5%          | 14.6%          | 14.6% | 14.6% |       |
| tr F1SHR2 F1SHR2 |         | 8             | 1          | 2          | 1              | 1              | 0              | 0              | 1              | 12         | 7          | 18             | 3              | 3              | 0              | 0                 | 26.1%      | 3.0%       | 7.8%           | 3.0%           | 3.0%           | 0.0%           | 0.0%  | 5.8%  |       |
| tr I3LCA2 I3LCA2 |         | 25            | 13         | 15         | 2              | 5              | 3              | 3              | 8              | 70         | 73         | 135            | 16             | 20             | 9              | 4                 | 36         | 45.6%      | 29.9%          | 28.6%          | 6.0%           | 15.5%          | 7.3%  | 10.9% | 21.7% |
| tr F1RHN3 F1RHN3 |         | 13            | 9          | 2          | 1              | 3              | 2              | 4              | 5              | 25         | 23         | 8              | 3              | 9              | 3              | 26                | 55.2%      | 44.4%      | 8.5%           | 9.6%           | 20.0%          | 4.8%           | 23.0% | 24.1% |       |
| tr F2Z5F2 F2Z5F2 |         | 4             | 3          | 1          | 0              | 3              | 0              | 1              | 5              | 7          | 9          | 2              | 0              | 5              | 0              | 2                 | 14         | 23.5%      | 22.5%          | 6.0%           | 0.0%           | 22.0%          | 0.0%  | 5.5%  | 35.5% |
| tr F1RTV5 F1RTV5 |         | 11            | 8          | 6          | 2              | 3              | 2              | 2              | 5              | 30         | 28         | 19             | 3              | 8              | 7              | 10                | 23         | 33.4%      | 16.6%          | 15.4%          | 7.5%           | 7.5%           | 4.9%  | 4.9%  | 12.6% |
| Q6QRN9           |         | 8             | 14         | 3          | 4              | 5              | 9              | 1              | 2              | 28         | 144        | 74             | 17             | 18             | 18             | 10                | 26         | 23.2%      | 43.0%          | 9.7%           | 17.4%          | 20.8%          | 34.6% | 9.1%  | 12.4% |
| Q5G6V9           |         | 10            | 2          | 5          | 2              | 2              | 0              | 2              | 3              | 41         | 11         | 49             | 6              | 10             | 0              | 25                | 54.2%      | 15.1%      | 33.7%          | 15.1%          | 15.1%          | 0.0%           | 20.5% | 19.3% |       |
| tr F1RVM6 F1RVM6 |         | 1             | 2          | 2          | 0              | 2              | 1              | 1              | 1              | 6          | 7          | 8              | 0              | 3              | 1              | 3                 | 1          | 7.7%       | 12.9%          | 15.8%          | 0.0%           | 12.9%          | 5.3%  | 7.7%  | 7.7%  |
| tr I3L7B9 I3L7B9 |         | 1             | 2          | 2          | 0              | 2              | 1              | 1              | 1              | 6          | 7          | 8              | 0              | 3              | 1              | 3                 | 1          | 7.6%       | 12.9%          | 15.7%          | 0.0%           | 12.9%          | 5.2%  | 7.6%  | 7.6%  |
| tr F1SP93 F1SP93 |         | 16            | 6          | 15         | 1              | 2              | 3              | 8              | 17             | 35         | 11         | 102            | 6              | 4              | 4              | 52                | 67         | 29.0%      | 17.0%          | 26.2%          | 2.6%           | 5.3%           | 6.6%  | 20.9% | 33.2% |
| tr I3LIX1 I3LIX1 |         | 4             | 6          | 2          | 1              | 3              | 1              | 1              | 2              | 10         | 13         | 11             | 3              | 3              | 1              | 1                 | 6          | 17.8%      | 37.8%          | 14.8%          | 5.9%           | 20.7%          | 5.9%  | 8.1%  | 18.5% |
| tr F1RZ28 F1RZ28 |         | 10            | 5          | 3          | 2              | 2              | 4              | 2              | 5              | 44         | 36         | 24             | 13             | 5              | 6              | 6                 | 34         | 39.4%      | 23.6%          | 14.5%          | 14.5%          | 14.5%          | 24.2% | 9.1%  | 27.3% |
| Q45FY6           |         | 8             | 2          | 2          | 1              | 1              | 0              | 0              | 1              | 28         | 2          | 16             | 5              | 4              | 0              | 0                 | 7          | 52.3%      | 18.3%          | 13.3%          | 4.6%           | 4.6%           | 0.0%  | 0.0%  | 13.8% |
| tr F1RPL1 F1RPL1 |         | 4             | 2          | 2          | 0              | 2              | 1              | 1              | 1              | 17         | 3          | 10             | 0              | 4              | 2              | 12                | 1          | 23.1%      | 20.0%          | 8.5%           | 0.0%           | 21.5%          | 14.6% | 14.6% | 14.6% |
| tr F2Z575 F2Z575 |         | 4             | 2          | 2          | 0              | 2              | 1              | 1              | 1              | 17         | 3          | 10             | 0              | 4              | 2              | 12                | 1          | 23.1%      | 20.0%          | 8.5%           | 0.0%           | 21.5%          | 14.6% | 14.6% | 14.6% |
| tr F1RPL3 F1RPL3 |         | 4             | 2          | 2          | 0              | 2              | 1              | 1              | 1              | 17         | 3          | 10             | 0              | 4              | 2              | 12                | 1          | 22.7%      | 19.7%          | 8.3%           | 0.0%           | 21.2%          | 14.4% | 14.4% | 14.4% |
| tr F2Z5L5 F2Z5L5 |         | 4             | 2          | 2          | 0              | 2              | 1              | 1              | 1              | 17         | 3          | 10             | 0              | 4              | 2              | 12                | 1          | 23.3%      | 20.2%          | 8.5%           | 0.0%           | 21.7%          | 14.7% | 14.7% | 14.7% |
| tr F1RPK0 F1RPK0 |         | 4             | 2          | 2          | 0              | 2              | 1              | 1              | 1              | 17         | 3          | 10             | 0              | 4              | 2              | 12                | 1          | 23.1%      | 20.0%          | 8.5%           | 0.0%           | 21.5%          | 14.6% | 14.6% | 14.6% |
| tr F2Z5L2 F2Z5L2 |         | 4             | 2          | 2          | 0              | 2              | 1              | 1              | 1              | 17         | 3          | 10             | 0              | 4              | 2              | 12                | 1          | 23.1%      | 20.0%          | 8.5%           | 0.0%           | 21.5%          | 14.6% | 14.6% | 14.6% |
| tr J9JIL1 J9JIL1 |         | 3             | 1          | 0          | 1              | 1              | 0              | 2              | 5              | 8          | 2          | 0              | 1              | 2              | 0              | 13                | 9          | 11.0%      | 9.9%           | 0.0%           | 9.9%           | 9.9%           | 0.0%  | 19.9% | 20.9% |
| tr F1SK55 F1SK55 |         | 2             | 2          | 0          | 0              | 0              | 2              | 1              | 5              | 3          | 7          | 0              | 0              | 0              | 3              | 4                 | 18         | 10.1%      | 3.6%           | 0.0%           | 0.0%           | 0.0%           | 3.6%  | 6.6%  | 26.8% |
| tr I3LSY4 I3LSY4 |         | 2             | 2          | 0          | 1              | 1              | 1              | 0              | 0              | 2          | 8          | 0              | 1              | 1              | 1              | 0                 | 0          | 4.3%       | 1.3%           | 0.0%           | 2.1%           | 1.1%           | 1.1%  | 0.0%  | 0.0%  |
| tr K7GRB9 K7GRB9 |         | 2             | 3          | 1          | 0              | 1              | 0              | 0              | 0              | 3          | 7          | 1              | 0              | 3              | 0              | 0                 | 0          | 7.5%       | 6.8%           | 2.1%           | 0.0%           | 4.3%           | 0.0%  | 0.0%  | 0.0%  |
| tr F1RX17 F1RX17 |         | 5             | 2          | 1          | 0              | 2              | 0              | 0              | 0              | 7          | 3          | 1              | 0              | 3              | 0              | 0                 | 0          | 4.7%       | 1.4%           | 0.6%           | 0.0%           | 1.4%           | 0.0%  | 0.0%  | 0.0%  |
| tr F1SPV0 F1SPV0 |         | 2             | 3          | 1          | 0              | 1              | 0              | 0              | 0              | 3          | 7          | 1              | 0              | 3              | 0              | 0                 | 0          | 8.0%       | 7.3%           | 2.3%           | 0.0%           | 4.6%           | 0.0%  | 0.0%  | 0.0%  |
| tr K7GME3 K7GME3 |         | 4             | 2          | 2          | 1              | 1              | 0              | 0              | 0              | 5          | 5          | 5              | 1              | 2              | 0              | 0                 | 0          | 19.5%      | 9.3%           | 16.7%          | 4.7%           | 4.7%           | 0.0%  | 0.0%  | 0.0%  |
| tr F1RMJ4 F1RMJ4 |         | 31            | 14         | 14         | 4              | 8              | 4              | 7              | 14             | 76         | 55         | 136            | 16             | 18             | 5              | 46                | 54         | 39.5%      | 18.6%          | 18.0%          | 4.2%           | 9.6%           | 7.1%  | 16.0% | 25.7% |
| tr I3LDJ6 I3LDJ6 |         | 8             | 6          | 2          | 3              | 3              | 5              | 1              | 1              | 27         | 84         | 71             | 12             | 9              | 12             | 10                | 1          | 37.1%      | 33.5%          | 10.8%          | 20.1%          | 20.1%          | 30.9% | 13.9% | 13.9% |
| P26044           |         | 27            | 15         | 12         | 9              | 13             |                |                |                |            |            |                |                |                |                |                   |            |            |                |                |                |                |       |       |       |

| Sample#          | Peptide Count |            |            |                |                |                |                | Spectral Count |            |            |                |                |                |                | Sequence Coverage |            |            |                |                |                |                |       |       |       |
|------------------|---------------|------------|------------|----------------|----------------|----------------|----------------|----------------|------------|------------|----------------|----------------|----------------|----------------|-------------------|------------|------------|----------------|----------------|----------------|----------------|-------|-------|-------|
|                  | Whole Cell    | Whole Cell | Whole Cell | Cilia Fraction | Cilia Fraction | Cilia Fraction | Cilia Fraction | Whole Cell     | Whole Cell | Whole Cell | Cilia Fraction | Cilia Fraction | Cilia Fraction | Cilia Fraction | Whole Cell        | Whole Cell | Whole Cell | Cilia Fraction | Cilia Fraction | Cilia Fraction | Cilia Fraction |       |       |       |
|                  | 1             | 2          | 6          | 4              | 3              | 5              | 7              | 8              | 1          | 2          | 6              | 4              | 3              | 5              | 7                 | 8          | 1          | 2              | 6              | 4              | 3              | 5     | 7     | 8     |
| Accession        |               |            |            |                |                |                |                |                |            |            |                |                |                |                |                   |            |            |                |                |                |                |       |       |       |
| tr K7GSP7 K7GSP7 | 4             | 1          | 4          | 0              | 2              | 0              | 3              | 19             | 5          | 2          | 9              | 0              | 2              | 0              | 38                | 204        | 11.7%      | 2.9%           | 11.8%          | 0.0%           | 4.7%           | 0.0%  | 8.3%  | 32.2% |
| tr K7GN86 K7GN86 | 4             | 1          | 4          | 0              | 2              | 0              | 3              | 19             | 5          | 2          | 9              | 0              | 2              | 0              | 38                | 204        | 12.0%      | 3.0%           | 12.1%          | 0.0%           | 4.8%           | 0.0%  | 8.5%  | 33.1% |
| tr F1SQX7 F1SQX7 | 4             | 1          | 4          | 0              | 2              | 0              | 3              | 18             | 5          | 2          | 9              | 0              | 2              | 0              | 38                | 203        | 12.2%      | 3.1%           | 12.3%          | 0.0%           | 4.9%           | 0.0%  | 8.6%  | 31.4% |
| P19156           | 2             | 0          | 3          | 1              | 1              | 0              | 2              | 2              | 7          | 0          | 20             | 1              | 1              | 0              | 266               | 117        | 2.7%       | 0.0%           | 2.7%           | 1.5%           | 1.3%           | 0.0%  | 1.3%  | 1.3%  |
| tr F1RM59 F1RM59 | 2             | 0          | 3          | 1              | 1              | 0              | 2              | 2              | 7          | 0          | 20             | 1              | 1              | 0              | 266               | 117        | 3.2%       | 0.0%           | 3.2%           | 1.7%           | 1.5%           | 0.0%  | 1.5%  | 1.5%  |
| tr K7GQM7 K7GQM7 | 0             | 2          | 0          | 1              | 1              | 0              | 2              | 2              | 0          | 7          | 0              | 1              | 1              | 0              | 37                | 14         | 0.0%       | 9.0%           | 0.0%           | 3.0%           | 3.0%           | 0.0%  | 9.0%  | 9.0%  |
| tr I3LLG9 I3LLG9 | 0             | 2          | 0          | 1              | 1              | 0              | 2              | 2              | 0          | 7          | 0              | 1              | 1              | 0              | 37                | 14         | 0.0%       | 6.6%           | 0.0%           | 2.2%           | 2.2%           | 0.0%  | 6.6%  | 6.6%  |
| tr K7GRD9 K7GRD9 | 0             | 2          | 0          | 1              | 1              | 0              | 2              | 2              | 0          | 7          | 0              | 1              | 1              | 0              | 37                | 14         | 0.0%       | 11.6%          | 0.0%           | 3.9%           | 3.9%           | 0.0%  | 11.6% | 11.6% |
| tr F1RUC0 F1RUC0 | 0             | 2          | 0          | 1              | 1              | 0              | 2              | 2              | 0          | 7          | 0              | 1              | 1              | 0              | 37                | 14         | 0.0%       | 6.6%           | 0.0%           | 2.2%           | 2.2%           | 0.0%  | 6.6%  | 6.6%  |
| tr F1S535 F1S535 | 2             | 2          | 3          | 0              | 2              | 0              | 0              | 2              | 4          | 3          | 7              | 0              | 2              | 0              | 0                 | 2          | 5.1%       | 2.6%           | 5.9%           | 0.0%           | 3.4%           | 0.0%  | 0.0%  | 5.1%  |
| tr F1SH97 F1SH97 | 2             | 4          | 0          | 0              | 2              | 0              | 0              | 0              | 2          | 5          | 0              | 0              | 2              | 0              | 0                 | 0          | 6.8%       | 8.2%           | 0.0%           | 0.0%           | 3.5%           | 0.0%  | 0.0%  | 0.0%  |
| tr F1RW99 F1RW99 | 1             | 2          | 0          | 0              | 0              | 2              | 0              | 0              | 3          | 4          | 0              | 0              | 0              | 2              | 0                 | 0          | 5.5%       | 5.5%           | 0.0%           | 0.0%           | 0.0%           | 5.5%  | 0.0%  | 0.0%  |
| tr F1RPT3 F1RPT3 | 2             | 1          | 0          | 1              | 1              | 0              | 0              | 0              | 2          | 5          | 0              | 1              | 1              | 0              | 0                 | 0          | 2.8%       | 0.5%           | 0.0%           | 0.5%           | 0.5%           | 0.0%  | 0.0%  | 0.0%  |
| tr F1SJ99 F1SJ99 | 1             | 1          | 0          | 0              | 1              | 0              | 0              | 0              | 2          | 5          | 0              | 0              | 2              | 0              | 0                 | 0          | 13.0%      | 7.4%           | 0.0%           | 0.0%           | 7.4%           | 0.0%  | 0.0%  | 0.0%  |
| tr F1RRJ3 F1RRJ3 | 0             | 2          | 0          | 0              | 1              | 1              | 0              | 0              | 0          | 7          | 0              | 0              | 1              | 1              | 0                 | 0          | 0.0%       | 6.6%           | 0.0%           | 0.0%           | 6.6%           | 6.6%  | 0.0%  | 0.0%  |
| tr F1S8H0 F1S8H0 | 3             | 1          | 0          | 0              | 1              | 0              | 0              | 0              | 4          | 3          | 0              | 0              | 2              | 0              | 0                 | 0          | 30.1%      | 24.3%          | 0.0%           | 0.0%           | 24.3%          | 0.0%  | 0.0%  | 0.0%  |
| tr F1RVJ2 F1RVJ2 | 2             | 2          | 3          | 1              | 1              | 0              | 0              | 0              | 2          | 5          | 7              | 1              | 1              | 0              | 0                 | 0          | 3.4%       | 1.7%           | 4.1%           | 0.8%           | 0.8%           | 0.0%  | 0.0%  | 0.0%  |
| tr F1SCS1 F1SCS1 | 11            | 9          | 6          | 1              | 5              | 1              | 1              | 1              | 19         | 27         | 40             | 3              | 8              | 2              | 1                 | 2          | 21.8%      | 11.8%          | 8.6%           | 3.8%           | 9.4%           | 3.8%  | 1.5%  | 3.2%  |
| tr I3LMJ8 I3LMJ8 | 2             | 3          | 1          | 1              | 2              | 1              | 0              | 1              | 3          | 29         | 1              | 1              | 5              | 3              | 0                 | 4          | 6.1%       | 12.2%          | 6.6%           | 2.9%           | 5.6%           | 2.9%  | 0.0%  | 6.6%  |
| A1XQU5           | 5             | 7          | 4          | 1              | 3              | 1              | 1              | 3              | 11         | 14         | 26             | 3              | 3              | 1              | 1                 | 8          | 33.1%      | 55.1%          | 30.1%          | 5.9%           | 20.6%          | 5.9%  | 8.1%  | 33.8% |
| tr F1RYQ0 F1RYQ0 | 8             | 5          | 2          | 1              | 1              | 1              | 0              | 0              | 12         | 31         | 14             | 6              | 5              | 1              | 0                 | 0          | 31.2%      | 16.8%          | 7.9%           | 2.3%           | 2.3%           | 2.3%  | 0.0%  | 0.0%  |
| tr I3LFN7 I3LFN7 | 5             | 3          | 3          | 1              | 2              | 0              | 0              | 0              | 11         | 7          | 21             | 2              | 3              | 0              | 0                 | 0          | 27.0%      | 18.5%          | 16.3%          | 6.7%           | 12.9%          | 0.0%  | 0.0%  | 0.0%  |
| tr I3LG46 I3LG46 | 8             | 5          | 4          | 1              | 2              | 3              | 0              | 1              | 28         | 19         | 31             | 4              | 5              | 4              | 0                 | 3          | 24.4%      | 17.4%          | 19.0%          | 3.7%           | 5.4%           | 5.4%  | 0.0%  | 11.2% |
| tr F1RZQ6 F1RZQ6 | 8             | 13         | 3          | 4              | 5              | 7              | 1              | 2              | 25         | 138        | 69             | 14             | 15             | 16             | 10                | 26         | 27.2%      | 36.9%          | 12.8%          | 17.4%          | 20.8%          | 24.5% | 9.1%  | 12.4% |
| tr F1S758 F1S758 | 1             | 1          | 0          | 1              | 1              | 1              | 0              | 0              | 2          | 27         | 0              | 1              | 4              | 3              | 0                 | 0          | 2.9%       | 2.9%           | 0.0%           | 2.9%           | 2.9%           | 2.9%  | 0.0%  | 0.0%  |
| tr F1RVF0 F1RVF0 | 1             | 1          | 0          | 1              | 1              | 1              | 0              | 0              | 2          | 27         | 0              | 1              | 4              | 3              | 0                 | 0          | 2.4%       | 2.4%           | 0.0%           | 2.4%           | 2.4%           | 2.4%  | 0.0%  | 0.0%  |
| tr F1SP8 F1SP8   | 0             | 4          | 0          | 1              | 1              | 3              | 0              | 0              | 0          | 62         | 0              | 5              | 1              | 11             | 0                 | 0          | 0.0%       | 13.3%          | 0.0%           | 10.9%          | 12.5%          | 13.3% | 0.0%  | 0.0%  |
| tr I3LV37 I3LV37 | 0             | 4          | 0          | 1              | 1              | 3              | 0              | 0              | 0          | 62         | 0              | 5              | 1              | 11             | 0                 | 0          | 0.0%       | 16.0%          | 0.0%           | 13.2%          | 15.1%          | 16.0% | 0.0%  | 0.0%  |
| Q29381           | 8             | 5          | 2          | 3              | 2              | 0              | 1              | 1              | 22         | 11         | 18             | 5              | 4              | 0              | 1                 | 1          | 28.7%      | 15.3%          | 4.3%           | 8.4%           | 5.9%           | 0.0%  | 3.2%  | 9.3%  |
| tr F1RPY1 F1RPY1 | 10            | 2          | 3          | 1              | 3              | 0              | 2              | 3              | 18         | 4          | 12             | 3              | 3              | 0              | 4                 | 4          | 47.2%      | 5.7%           | 13.3%          | 4.0%           | 5.7%           | 0.0%  | 3.4%  | 9.1%  |
| tr I3LT2 I3LT2   | 4             | 2          | 4          | 0              | 1              | 1              | 0              | 0              | 6          | 5          | 33             | 0              | 2              | 1              | 0                 | 0          | 16.8%      | 5.0%           | 10.9%          | 0.0%           | 5.7%           | 2.8%  | 0.0%  | 0.0%  |
| tr F1SP18 F1SP18 | 14            | 8          | 4          | 2              | 4              | 1              | 2              | 7              | 33         | 45         | 16             | 8              | 11             | 2              | 6                 | 16         | 23.7%      | 16.9%          | 11.5%          | 3.9%           | 6.5%           | 2.1%  | 4.2%  | 12.1% |
| tr F1SPG0 F1SPG0 | 6             | 2          | 2          | 1              | 1              | 1              | 4              | 9              | 17         | 9          | 50             | 4              | 2              | 1              | 37                | 75         | 50.0%      | 15.8%          | 20.4%          | 6.6%           | 6.6%           | 31.6% | 49.3% |       |
| P54612           | 28            | 13         | 14         | 4              | 5              | 4              | 6              | 8              | 66         | 61         | 226            | 14             | 14             | 6              | 21                | 38         | 49.2%      | 20.2%          | 22.8%          | 7.0%           | 7.1%           | 4.9%  | 17.0% | 22.6% |
| P23687           | 9             | 6          | 5          | 1              | 1              | 1              | 1              | 0              | 13         | 32         | 29             | 6              | 5              | 1              | 1                 | 0          | 23.1%      | 13.0%          | 13.0%          | 1.5%           | 1.5%           | 1.5%  | 1.8%  | 0.0%  |
| Q3ZDR4           | 5             | 0          | 1          | 0              | 0              | 2              | 0              | 4              | 19         | 0          | 39             | 0              | 0              | 5              | 0                 | 20         | 25.3%      | 0.0%           | 7.4%           | 0.0%           | 0.0%           | 10.5% | 0.0%  | 17.9% |
| tr F1RMJ9 F1RMJ9 | 2             | 2          | 0          | 1              | 1              | 0              | 1              | 1              | 5          | 14         | 0              | 1              | 4              | 0              | 1                 | 1          | 3.5%       | 3.6%           | 0.0%           | 1.6%           | 1.6%           | 0.0%  | 2.0%  | 2.0%  |
| tr F1S227 F1S227 | 3             | 1          | 1          | 1              | 1              | 0              | 0              | 0              | 3          | 20         | 6              | 4              | 2              | 0              | 0                 | 0          | 27.4%      | 7.8%           | 8.4%           | 7.8%           | 7.8%           | 0.0%  | 0.0%  | 0.0%  |
| tr K7GMF7 K7GMF7 | 11            | 5          | 5          | 2              | 2              | 0              | 1              | 0              | 18         | 9          | 78             | 2              | 5              | 0              | 3                 | 0          | 66.4%      | 38.9%          | 26.5%          | 10.6%          | 10.6%          | 0.0%  | 11.9% | 0.0%  |
| tr I3LSY1 I3LSY1 | 3             | 1          | 1          | 1              | 1              | 1              | 0              | 0              | 29         | 2          | 4              | 2              | 1              | 5              | 0                 | 0          | 29.8%      | 29.8%          | 16.7%          | 28.6%          | 29.8%          | 29.8% | 0.0%  | 0.0%  |
| tr F1SL07 F1SL07 | 5             | 4          | 2          | 0              | 2              | 3              | 0              | 0              | 7          | 24         | 13             | 0              | 2              | 6              | 0                 | 0          | 22.3%      | 10.6%          | 6.9%           | 0.0%           | 5.0%           | 8.2%  | 0.0%  | 0.0%  |
| tr I3LC00 I3LC00 | 5             | 3          | 1          | 1              | 2              | 1              | 0              | 1              | 6          | 29         | 1              | 1              | 5              | 3              | 0                 | 4          | 13.6%      | 9.6%           | 5.2%           | 2.3%           | 4.4%           | 2.3%  | 0.0%  | 5.2%  |
| tr F1SQE6 F1SQE6 | 8             | 3          | 2          | 1              | 4              | 0              | 1              | 3              | 25         | 15         | 7              | 1              | 9              | 0              | 6                 | 8          | 48.5%      | 18.0%          | 13.2%          | 11.4%          | 23.4%          | 0.0%  | 11.4% | 16.8% |
| Q4FAT7           | 5             | 3          | 5          | 1              | 2              | 0              | 2              | 2              | 13         | 7          | 37             | 2              | 3              | 0              | 5                 | 4          | 12.1%      | 5.8%           | 11.0%          | 1.5%           | 4.4%           | 0.0%  | 4.9%  | 4.9%  |
| tr F1SEQ7 F1SEQ7 | 19            | 17         | 14         | 8              | 9              | 6              | 4              | 9              | 119        | 145        | 276            | 28             | 29             | 9              | 37                | 100        | 54.6%      | 59.4%          | 41.9%          | 27.9%          | 42.8%          | 24.5% | 23.6% | 31.9% |
| tr F1S533 F1S533 | 6             | 2          | 2          | 1              | 3              | 1              | 1              | 4              | 20         | 12         | 26             | 2              | 5              | 1              | 8                 | 14         | 41.2%      | 18.1%          | 12.4%          | 8.0%           | 20.4%          | 10.2% | 10.2% | 24.3% |
| tr F2Z5L6 F2Z5L6 | 5             | 2          | 0          | 0              | 2              | 1              | 1              | 4              | 22         | 2          | 0              | 0              | 4              | 2              | 12                | 21         | 23.1%      | 17.7%          | 0.0%           | 0.0%           | 21.5%          | 14.6% | 14.6% | 23.1% |
| Q29293           | 3             | 4          | 1          | 0              | 0              | 1              | 0              | 1              | 4          | 12         | 11             | 0              | 0              | 4              | 0                 | 4          | 16.9%      | 17.7%          | 8.5%           | 0.0%           | 0.0%           | 9.2%  | 0.0%  | 8.5%  |
| tr F1S610 F1S610 | 5             | 3          | 2          | 0              | 2              | 0              | 2              | 8              | 5          | 7          | 7              | 0              | 3              | 0              | 8                 | 24         | 16.8%      | 9.5%           | 4.5%           | 0.0%           | 10.7%          | 0.0%  | 9.3%  | 27.3% |
| P21999           | 0             | 1          | 0          | 0              | 1              | 1              | 0              | 0              | 0          | 12         | 0              | 0              | 2              | 1              | 0                 | 0          | 0.0%       | 2.4%           | 0.0%           | 0.0%           | 2.4%           | 2.4%  | 0.0%  | 0.0%  |
| P14057           | 0             | 1          | 0          | 0              | 1              | 1              | 0              | 0              | 0          | 12         | 0              | 0              | 2              | 1              | 0                 | 0          | 0.0%       | 5.2%           | 0.0%           | 0.0%           | 5.2%           | 5.2%  | 0.0%  | 0.0%  |
| tr F1SCI9 F1SCI9 | 7             | 0          | 2          | 0              | 2              | 0              | 4              | 20             | 8          | 0          | 8              | 0              | 2              | 0              | 33                | 165        | 16.2%      | 0.0%           | 4.7%           | 0.0%           | 3.4%           | 0.0%  | 9.9%  | 30.5% |
| tr K7GM14 K7GM14 | 4             | 0          | 3          | 0              | 2              | 0              | 4              | 5              | 8          | 0          | 10             | 0              | 2              | 0              | 38                | 62         | 8.3%       | 0.0%           | 9.4%           | 0.0%           | 6.7%           | 0.0%  | 9.6%  | 16.3% |
| tr K7GLE2 K7GLE2 | 4             | 0          | 3          | 0              | 2              | 0              | 4              | 5              | 8          | 0          | 10             | 0              | 2              | 0              | 38                | 62         | 14.2%      | 0.0%           | 16.1%          | 0.0%           | 11.5%          | 0.0%  | 16.5% | 28.0% |
| tr K7GL11 K7GL11 | 4             | 0          | 3          | 0              | 2              | 0              | 4              | 5              | 8          | 0          | 10             | 0              | 2              | 0              | 38                | 62         | 6.3%       | 0.0%           | 7.1%           | 0.0%           | 5.1%           | 0.0%  | 7.3%  | 12.3% |
| tr F1SGT4 F1SGT4 | 4             | 0          | 3          | 0              | 2              | 0              | 4              | 5              | 8          | 0          | 10             | 0              | 2              | 0              | 38                | 62         | 3.9%       | 0.0%           | 4.4%           | 0.0%           | 3.2%           | 0.0%  | 4.6%  | 7.7%  |
| tr K7GN90 K7GN90 | 4             | 0          | 3          | 0              | 2              | 0              | 4              | 5              | 8          | 0          | 10             | 0              | 2              | 0              | 38                | 62         | 4.2%       | 0.0%           | 4.7%           | 0.0%           | 3.4%           | 0.0%  | 4.8%  | 8.2%  |
| tr K7GND9 K7GND9 | 4             | 0          | 3          | 0              | 2              | 0              | 4              | 5              | 8          | 0          | 10             | 0              | 2              | 0              | 38                | 62         | 4.4%       | 0.0%           | 5.0%           | 0.0%           | 3.6%           | 0.0%  | 5.1%  | 8.7%  |
| tr K7GLL1 K7GLL1 | 4             | 0          | 3          | 0              | 2              | 0              | 4              | 5              | 8          | 0          | 10             | 0              | 2              | 0              | 38                | 62         | 7.2%       | 0.0%           | 8.1%           | 0.0%           | 5.8%           | 0.0%  | 8.4%  | 14.2% |
| tr I3LI00 I3LI00 | 4             | 0          | 0          | 1              | 1              | 0              | 0              | 1              | 8          | 0          | 0              | 1              | 1              | 0              | 0                 | 2          | 11.9%      | 0.0%           | 0.0%           | 3.1%           | 3.1%           | 0.0%  | 0.0%  | 3.1%  |
| tr F1SP04 F1SP04 | 6             | 1          | 3          | 0              | 1              | 0              | 0              | 1              | 7          | 1          | 6              | 0              | 2              | 0              | 0                 | 4          | 8.5%       | 2.1%           | 4.6%           | 0.0%           | 2.1%           | 0.0%  | 0.0%  | 1.2%  |
| tr I3LJB6 I3LJB6 | 5             | 1          | 0          | 1              | 1              | 0              | 0              | 1              | 6          | 2          | 0              | 1              | 1              | 0              | 0                 | 1          | 12.1%      | 2.4%           | 0.0%           | 2.6%           | 1.7%           | 0.0%  | 0.0%  | 2.4%  |
| tr F1S0U8 F1S0U8 | 5             | 1          | 0          | 1              | 1              | 0              | 0              | 1              | 6          | 2          | 0</            |                |                |                |                   |            |            |                |                |                |                |       |       |       |

| Sample#          | Peptide Count |            |            |                |                |                |                | Spectral Count |            |            |                |                |                |                | Sequence Coverage |            |            |                |                |                |                |       |       |       |
|------------------|---------------|------------|------------|----------------|----------------|----------------|----------------|----------------|------------|------------|----------------|----------------|----------------|----------------|-------------------|------------|------------|----------------|----------------|----------------|----------------|-------|-------|-------|
|                  | Whole Cell    | Whole Cell | Whole Cell | Cilia Fraction | Cilia Fraction | Cilia Fraction | Cilia Fraction | Whole Cell     | Whole Cell | Whole Cell | Cilia Fraction | Cilia Fraction | Cilia Fraction | Cilia Fraction | Whole Cell        | Whole Cell | Whole Cell | Cilia Fraction | Cilia Fraction | Cilia Fraction | Cilia Fraction |       |       |       |
|                  | 1             | 2          | 6          | 4              | 3              | 5              | 7              | 8              | 1          | 2          | 6              | 4              | 3              | 5              | 7                 | 8          | 1          | 2              | 6              | 4              | 3              | 5     | 7     | 8     |
| Accession        |               |            |            |                |                |                |                |                |            |            |                |                |                |                |                   |            |            |                |                |                |                |       |       |       |
| tr I3LQA5 I3LQA5 | 1             | 3          | 0          | 0              | 1              | 0              | 0              | 0              | 1          | 3          | 0              | 0              | 1              | 0              | 0                 | 0          | 0.9%       | 2.3%           | 0.0%           | 0.0%           | 0.9%           | 0.0%  | 0.0%  | 0.0%  |
| tr I3LS91 I3LS91 | 0             | 1          | 0          | 0              | 1              | 0              | 0              | 0              | 0          | 4          | 0              | 0              | 1              | 0              | 0                 | 0          | 0.0%       | 8.0%           | 0.0%           | 0.0%           | 8.0%           | 0.0%  | 0.0%  | 0.0%  |
| tr F1SB37 F1SB37 | 3             | 0          | 0          | 0              | 1              | 0              | 0              | 0              | 4          | 0          | 0              | 0              | 1              | 0              | 0                 | 0          | 6.7%       | 0.0%           | 0.0%           | 0.0%           | 3.4%           | 0.0%  | 0.0%  | 0.0%  |
| tr I3LE81 I3LE81 | 2             | 1          | 0          | 1              | 0              | 0              | 0              | 0              | 2          | 2          | 0              | 1              | 0              | 0              | 0                 | 0          | 4.3%       | 4.3%           | 0.0%           | 4.3%           | 0.0%           | 0.0%  | 0.0%  | 0.0%  |
| tr K7GNW3 K7GNW3 | 2             | 1          | 0          | 0              | 1              | 0              | 0              | 0              | 2          | 2          | 0              | 0              | 1              | 0              | 0                 | 0          | 6.6%       | 2.0%           | 0.0%           | 0.0%           | 2.0%           | 0.0%  | 0.0%  | 0.0%  |
| tr F1SKP7 F1SKP7 | 1             | 2          | 0          | 0              | 1              | 0              | 0              | 0              | 1          | 3          | 0              | 0              | 1              | 0              | 0                 | 0          | 3.1%       | 3.4%           | 0.0%           | 0.0%           | 3.6%           | 0.0%  | 0.0%  | 0.0%  |
| Q29116           | 1             | 1          | 0          | 0              | 0              | 1              | 0              | 0              | 1          | 3          | 0              | 0              | 0              | 1              | 0                 | 0          | 0.9%       | 0.9%           | 0.0%           | 0.0%           | 0.0%           | 1.6%  | 0.0%  | 0.0%  |
| tr I3LP46 I3LP46 | 1             | 2          | 0          | 0              | 1              | 0              | 0              | 0              | 1          | 3          | 0              | 0              | 1              | 0              | 0                 | 0          | 4.4%       | 4.7%           | 0.0%           | 0.0%           | 5.1%           | 0.0%  | 0.0%  | 0.0%  |
| tr I3LRK0 I3LRK0 | 1             | 2          | 0          | 0              | 1              | 0              | 0              | 0              | 1          | 3          | 0              | 0              | 1              | 0              | 0                 | 0          | 3.1%       | 4.6%           | 0.0%           | 0.0%           | 2.9%           | 0.0%  | 0.0%  | 0.0%  |
| tr I3LVF4 I3LVF4 | 1             | 2          | 0          | 0              | 1              | 0              | 0              | 0              | 1          | 3          | 0              | 0              | 1              | 0              | 0                 | 0          | 3.7%       | 4.0%           | 0.0%           | 0.0%           | 4.2%           | 0.0%  | 0.0%  | 0.0%  |
| tr I3LH17 I3LH17 | 1             | 1          | 0          | 0              | 1              | 0              | 0              | 0              | 1          | 3          | 0              | 0              | 1              | 0              | 0                 | 0          | 6.0%       | 2.3%           | 0.0%           | 0.0%           | 2.3%           | 0.0%  | 0.0%  | 0.0%  |
| tr F1SI45 F1SI45 | 1             | 3          | 0          | 0              | 1              | 0              | 0              | 0              | 1          | 3          | 0              | 0              | 1              | 0              | 0                 | 0          | 0.9%       | 2.3%           | 0.0%           | 0.0%           | 0.9%           | 0.0%  | 0.0%  | 0.0%  |
| tr I3L7A9 I3L7A9 | 0             | 1          | 0          | 0              | 1              | 0              | 0              | 0              | 0          | 4          | 0              | 0              | 1              | 0              | 0                 | 0          | 0.0%       | 9.3%           | 0.0%           | 0.0%           | 9.3%           | 0.0%  | 0.0%  | 0.0%  |
| tr F1SU27 F1SU27 | 4             | 0          | 0          | 0              | 0              | 1              | 0              | 0              | 4          | 0          | 0              | 0              | 0              | 1              | 0                 | 0          | 4.3%       | 0.0%           | 0.0%           | 0.0%           | 0.0%           | 1.5%  | 0.0%  | 0.0%  |
| tr F1SFL0 F1SFL0 | 1             | 1          | 0          | 1              | 0              | 0              | 0              | 0              | 3          | 1          | 0              | 1              | 0              | 0              | 0                 | 0          | 3.8%       | 3.8%           | 0.0%           | 3.8%           | 0.0%           | 0.0%  | 0.0%  | 0.0%  |
| tr F1RLV7 F1RLV7 | 1             | 1          | 0          | 0              | 1              | 0              | 0              | 0              | 1          | 3          | 0              | 0              | 1              | 0              | 0                 | 0          | 5.9%       | 2.2%           | 0.0%           | 0.0%           | 2.2%           | 0.0%  | 0.0%  | 0.0%  |
| tr F1SUT0 F1SUT0 | 3             | 0          | 2          | 1              | 0              | 0              | 0              | 1              | 4          | 0          | 14             | 1              | 0              | 0              | 0                 | 3          | 13.5%      | 0.0%           | 12.0%          | 5.3%           | 0.0%           | 0.0%  | 0.0%  | 7.2%  |
| tr I3LHS8 I3LHS8 | 3             | 0          | 1          | 0              | 1              | 0              | 0              | 0              | 4          | 0          | 2              | 0              | 1              | 0              | 0                 | 0          | 8.1%       | 0.0%           | 5.0%           | 0.0%           | 3.3%           | 0.0%  | 0.0%  | 0.0%  |
| tr F1SS96 F1SS96 | 2             | 1          | 1          | 0              | 1              | 0              | 0              | 0              | 3          | 1          | 3              | 0              | 1              | 0              | 0                 | 0          | 6.8%       | 3.4%           | 4.2%           | 0.0%           | 3.4%           | 0.0%  | 0.0%  | 0.0%  |
| tr I3LN50 I3LN50 | 2             | 1          | 1          | 0              | 1              | 0              | 0              | 0              | 2          | 2          | 4              | 0              | 1              | 0              | 0                 | 0          | 7.6%       | 3.1%           | 4.7%           | 0.0%           | 6.8%           | 0.0%  | 0.0%  | 0.0%  |
| tr F1RTN3 F1RTN3 | 38            | 15         | 26         | 9              | 15             | 3              | 16             | 32             | 112        | 153        | 437            | 28             | 28             | 9              | 657               | 408        | 57.4%      | 25.8%          | 35.9%          | 23.1%          | 25.8%          | 4.5%  | 35.0% | 55.1% |
| tr F1RWCS F1RWCS | 27            | 3          | 6          | 1              | 3              | 0              | 0              | 5              | 45         | 8          | 28             | 4              | 9              | 0              | 0                 | 18         | 30.2%      | 4.3%           | 7.6%           | 2.3%           | 4.5%           | 0.0%  | 0.0%  | 8.8%  |
| tr I3LVD5 I3LVD5 | 46            | 35         | 29         | 13             | 27             | 17             | 16             | 37             | 1244       | 346        | 1111           | 116            | 242            | 31             | 2487              | 1223       | 67.5%      | 70.4%          | 56.5%          | 32.3%          | 62.1%          | 49.1% | 39.5% | 56.5% |
| Q6QAQ1           | 46            | 35         | 29         | 13             | 27             | 17             | 16             | 37             | 1244       | 346        | 1111           | 116            | 242            | 31             | 2487              | 1223       | 67.5%      | 70.4%          | 56.5%          | 32.3%          | 62.1%          | 49.1% | 39.5% | 56.5% |
| tr F1SB42 F1SB42 | 17            | 11         | 12         | 5              | 9              | 3              | 1              | 13             | 59         | 105        | 123            | 13             | 18             | 9              | 46                | 225        | 32.6%      | 26.6%          | 26.3%          | 16.7%          | 16.7%          | 7.4%  | 3.1%  | 31.7% |
| tr F2Z565 F2Z565 | 16            | 15         | 4          | 4              | 5              | 8              | 1              | 2              | 41         | 148        | 86             | 14             | 15             | 17             | 10                | 26         | 46.6%      | 48.0%          | 15.8%          | 17.4%          | 20.8%          | 30.2% | 9.1%  | 12.4% |
| tr F1SD5 F1SD5   | 8             | 2          | 6          | 1              | 1              | 1              | 3              | 7              | 13         | 12         | 24             | 1              | 4              | 1              | 67                | 119        | 31.5%      | 13.1%          | 22.0%          | 7.2%           | 7.2%           | 7.2%  | 18.4% | 23.4% |
| P27485           | 8             | 5          | 4          | 1              | 2              | 3              | 2              | 1              | 18         | 24         | 24             | 2              | 4              | 4              | 3                 | 1          | 35.8%      | 19.9%          | 19.4%          | 5.0%           | 6.0%           | 6.0%  | 19.9% | 11.4% |
| tr F1SC80 F1SC80 | 8             | 5          | 4          | 1              | 2              | 3              | 2              | 1              | 18         | 24         | 24             | 2              | 4              | 4              | 3                 | 1          | 35.8%      | 19.9%          | 19.4%          | 5.0%           | 6.0%           | 6.0%  | 19.9% | 11.4% |
| tr F1RVA0 F1RVA0 | 4             | 1          | 1          | 0              | 2              | 0              | 0              | 1              | 18         | 3          | 10             | 0              | 5              | 0              | 0                 | 9          | 38.2%      | 6.6%           | 8.1%           | 0.0%           | 23.5%          | 0.0%  | 0.0%  | 23.5% |
| Q71LE2           | 4             | 1          | 1          | 0              | 2              | 0              | 0              | 1              | 18         | 3          | 10             | 0              | 5              | 0              | 0                 | 9          | 38.2%      | 6.6%           | 8.1%           | 0.0%           | 23.5%          | 0.0%  | 0.0%  | 23.5% |
| tr I3L8K9 I3L8K9 | 9             | 2          | 1          | 1              | 2              | 0              | 0              | 1              | 18         | 3          | 15             | 2              | 3              | 0              | 0                 | 1          | 24.2%      | 5.6%           | 3.8%           | 6.0%           | 9.5%           | 0.0%  | 0.0%  | 6.0%  |
| tr I3L44 I3L44   | 3             | 4          | 2          | 1              | 2              | 2              | 1              | 4              | 18         | 37         | 12             | 4              | 4              | 5              | 17                | 5          | 13.1%      | 21.9%          | 17.5%          | 11.7%          | 11.7%          | 11.7% | 20.4% | 11.7% |
| ASA8V7           | 14            | 8          | 7          | 2              | 4              | 0              | 1              | 4              | 28         | 23         | 52             | 6              | 6              | 0              | 3                 | 6          | 22.5%      | 17.3%          | 10.6%          | 4.5%           | 10.1%          | 0.0%  | 3.6%  | 10.0% |
| tr I3LG31 I3LG31 | 7             | 5          | 4          | 0              | 3              | 2              | 0              | 1              | 13         | 17         | 22             | 0              | 4              | 3              | 0                 | 2          | 16.2%      | 9.8%           | 11.0%          | 0.0%           | 4.5%           | 2.7%  | 0.0%  | 2.7%  |
| P34930           | 24            | 7          | 16         | 2              | 5              | 1              | 4              | 10             | 43         | 13         | 100            | 3              | 9              | 1              | 21                | 22         | 31.2%      | 15.4%          | 20.0%          | 4.8%           | 13.3%          | 3.4%  | 9.5%  | 20.0% |
| tr F1RKI9 F1RKI9 | 6             | 5          | 2          | 2              | 2              | 3              | 1              | 1              | 11         | 54         | 6              | 6              | 5              | 4              | 1                 | 1          | 21.1%      | 25.1%          | 7.4%           | 8.0%           | 8.0%           | 16.8% | 4.3%  | 4.3%  |
| tr I3L7T6 I3L7T6 | 5             | 3          | 0          | 0              | 2              | 1              | 1              | 4              | 22         | 4          | 0              | 0              | 4              | 2              | 12                | 21         | 21.0%      | 21.0%          | 0.0%           | 0.0%           | 19.6%          | 13.3% | 13.3% | 21.0% |
| tr F1RTQ7 F1RTQ7 | 5             | 3          | 0          | 0              | 2              | 1              | 1              | 4              | 22         | 4          | 0              | 0              | 4              | 2              | 12                | 21         | 22.9%      | 22.9%          | 0.0%           | 0.0%           | 21.4%          | 14.5% | 14.5% | 22.9% |
| tr F1RR06 F1RR06 | 7             | 1          | 2          | 0              | 2              | 1              | 0              | 1              | 23         | 3          | 7              | 0              | 4              | 2              | 0                 | 1          | 13.3%      | 5.2%           | 6.0%           | 0.0%           | 8.5%           | 5.2%  | 0.0%  | 2.2%  |
| tr I3LPP8 I3LPP8 | 1             | 3          | 0          | 1              | 2              | 0              | 0              | 0              | 2          | 11         | 0              | 1              | 2              | 0              | 0                 | 0          | 3.8%       | 6.1%           | 0.0%           | 2.4%           | 6.1%           | 0.0%  | 0.0%  | 0.0%  |
| tr F1S530 F1S530 | 16            | 16         | 11         | 2              | 3              | 3              | 5              | 6              | 56         | 57         | 266            | 9              | 10             | 7              | 89                | 55         | 44.1%      | 42.1%          | 34.0%          | 6.1%           | 9.4%           | 10.8% | 19.9% | 23.9% |
| tr I3LK51 I3LK51 | 8             | 4          | 2          | 1              | 4              | 1              | 0              | 1              | 31         | 17         | 15             | 4              | 6              | 1              | 0                 | 6          | 30.1%      | 27.0%          | 14.1%          | 13.5%          | 28.2%          | 13.5% | 0.0%  | 13.5% |
| tr F1STD5 F1STD5 | 8             | 9          | 0          | 2              | 4              | 3              | 0              | 4              | 28         | 99         | 0              | 9              | 12             | 8              | 0                 | 18         | 25.8%      | 13.1%          | 0.0%           | 4.4%           | 12.8%          | 9.7%  | 0.0%  | 17.8% |
| P80031           | 13            | 5          | 8          | 1              | 4              | 1              | 2              | 6              | 56         | 54         | 154            | 6              | 13             | 6              | 4                 | 26         | 63.3%      | 28.0%          | 32.9%          | 5.3%           | 24.6%          | 5.3%  | 13.0% | 32.9% |
| tr Q2QC86 Q2QC86 | 2             | 1          | 0          | 1              | 1              | 1              | 0              | 0              | 4          | 18         | 0              | 2              | 2              | 1              | 0                 | 0          | 32.8%      | 10.2%          | 0.0%           | 10.2%          | 10.2%          | 10.2% | 0.0%  | 0.0%  |
| tr I3LI28 I3LI28 | 6             | 4          | 3          | 1              | 2              | 0              | 0              | 0              | 14         | 8          | 21             | 2              | 3              | 0              | 0                 | 0          | 25.8%      | 18.8%          | 13.6%          | 5.6%           | 10.8%          | 0.0%  | 0.0%  | 0.0%  |
| tr F1SK45 F1SK45 | 3             | 2          | 5          | 1              | 3              | 1              | 0              | 0              | 6          | 16         | 25             | 1              | 3              | 1              | 0                 | 0          | 17.2%      | 7.9%           | 26.0%          | 7.9%           | 14.1%          | 7.9%  | 0.0%  | 0.0%  |
| tr K7GS49 K7GS49 | 12            | 6          | 6          | 2              | 2              | 0              | 1              | 0              | 19         | 12         | 79             | 2              | 5              | 0              | 3                 | 0          | 41.0%      | 25.1%          | 22.1%          | 6.2%           | 6.2%           | 0.0%  | 6.9%  | 0.0%  |
| tr F1SLR8 F1SLR8 | 18            | 19         | 10         | 5              | 7              | 5              | 7              | 9              | 404        | 359        | 1183           | 27             | 126            | 19             | 853               | 686        | 89.0%      | 89.0%          | 43.1%          | 47.7%          | 47.7%          | 34.9% | 71.6% | 82.6% |
| tr F1SQ1 F1SQ1   | 6             | 3          | 2          | 1              | 1              | 1              | 2              | 3              | 25         | 55         | 20             | 3              | 9              | 6              | 4                 | 10         | 13.6%      | 3.9%           | 3.2%           | 2.3%           | 2.3%           | 2.3%  | 5.5%  | 5.8%  |
| Q19PY3           | 10            | 4          | 12         | 0              | 3              | 1              | 1              | 5              | 30         | 10         | 63             | 0              | 8              | 1              | 3                 | 16         | 25.9%      | 13.5%          | 24.2%          | 0.0%           | 4.0%           | 2.4%  | 2.4%  | 18.0% |
| tr F2Z5V0 F2Z5V0 | 10            | 4          | 12         | 0              | 3              | 1              | 1              | 5              | 30         | 10         | 63             | 0              | 8              | 1              | 3                 | 16         | 25.9%      | 13.5%          | 24.2%          | 0.0%           | 4.0%           | 2.4%  | 2.4%  | 18.0% |
| P26042           | 36            | 14         | 23         | 8              | 14             | 3              | 14             | 29             | 107        | 147        | 404            | 22             | 26             | 9              | 573               | 363        | 50.6%      | 23.1%          | 32.4%          | 20.3%          | 23.1%          | 4.5%  | 26.9% | 45.9% |
| tr F1RM74 F1RM74 | 5             | 5          | 4          | 2              | 2              | 0              | 0              | 1              | 27         | 31         | 471            | 6              | 7              | 0              | 0                 | 1          | 10.5%      | 10.5%          | 10.5%          | 8.6%           | 8.6%           | 0.0%  | 0.0%  | 3.9%  |
| tr F1SMC0 F1SMC0 | 18            | 8          | 5          | 2              | 2              | 0              | 1              | 3              | 45         | 45         | 37             | 8              | 12             | 0              | 8                 | 6          | 47.3%      | 26.9%          | 18.1%          | 5.1%           | 5.1%           | 0.0%  | 5.1%  | 13.0% |
| tr I3LCZ7 I3LCZ7 | 3             | 4          | 0          | 1              | 1              | 0              | 0              | 1              | 6          | 12         | 0              | 1              | 3              | 0              | 0                 | 1          | 4.2%       | 4.4%           | 0.0%           | 2.4%           | 2.4%           | 0.0%  | 0.0%  | 1.8%  |
| tr I3LDQ9 I3LDQ9 | 1             | 3          | 3          | 0              | 0              | 1              | 0              | 0              | 4          | 14         | 23             | 0              | 0              | 4              | 0                 | 0          | 6.7%       | 7.2%           | 18.9%          | 0.0%           | 0.0%           | 6.7%  | 0.0%  | 0.0%  |
| tr F1RK12 F1RK12 | 1             | 2          | 0          | 1              | 1              | 0              | 0              | 5              | 1          | 8          | 0              | 1              | 1              | 0              | 0                 | 10         | 7.5%       | 7.9%           | 0.0%           | 3.8%           | 3.8%           | 0.0%  | 0.0%  | 27.1% |
| Q52N47           | 1             | 2          | 0          | 1              | 1              | 0              | 0              | 5              | 1          | 8          | 0              | 1              | 1              | 0              | 0                 | 10         | 7.5%       | 7.9%           | 0.0%           | 3.8%           | 3.8%           | 0.0%  | 0.0%  | 27.1% |
| tr F1RJ1 F1RJ1   | 2             | 2          | 1          | 0              | 1              | 0              | 1              | 1              | 6          | 3          | 3              | 0              | 2              | 0              | 4                 | 3          | 5.5%       | 10.0%          | 4.2%           | 0.0%           | 4.5%           | 0.0%  | 8.0%  | 8.0%  |
| tr F1ST47 F1ST47 | 0             | 1          | 0          | 1              | 1              | 0              | 0              | 0              | 0          | 9          | 0              | 1              | 1              | 0              | 0                 | 0          | 0.0%       | 6.3%           | 0.0%           | 6              |                |       |       |       |

| Sample#          | Peptide Count |            |            |                |                |                |                | Spectral Count |            |            |                |                |                |                | Sequence Coverage |            |            |                |                |                |                |       |       |       |       |
|------------------|---------------|------------|------------|----------------|----------------|----------------|----------------|----------------|------------|------------|----------------|----------------|----------------|----------------|-------------------|------------|------------|----------------|----------------|----------------|----------------|-------|-------|-------|-------|
|                  | Whole Cell    | Whole Cell | Whole Cell | Cilia Fraction | Cilia Fraction | Cilia Fraction | Cilia Fraction | Whole Cell     | Whole Cell | Whole Cell | Cilia Fraction | Cilia Fraction | Cilia Fraction | Cilia Fraction | Whole Cell        | Whole Cell | Whole Cell | Cilia Fraction | Cilia Fraction | Cilia Fraction | Cilia Fraction |       |       |       |       |
|                  | 1             | 2          | 6          | 4              | 3              | 5              | 7              | 8              | 1          | 2          | 6              | 4              | 3              | 5              | 7                 | 8          | 1          | 2              | 6              | 4              | 3              | 5     | 7     | 8     |       |
| Accession        |               |            |            |                |                |                |                |                |            |            |                |                |                |                |                   |            |            |                |                |                |                |       |       |       |       |
| tr F1S3K5 F1S3K5 | 4             | 3          | 5          | 1              | 2              | 0              | 0              | 0              | 7          | 7          | 22             | 1              | 2              | 0              | 0                 | 0          | 9.1%       | 3.6%           | 8.1%           | 2.1%           | 2.1%           | 0.0%  | 0.0%  | 0.0%  |       |
| tr I3L566 I3L566 | 4             | 3          | 5          | 1              | 2              | 0              | 0              | 0              | 7          | 7          | 22             | 1              | 2              | 0              | 0                 | 0          | 9.5%       | 3.8%           | 8.4%           | 2.2%           | 2.2%           | 0.0%  | 0.0%  | 0.0%  |       |
| tr F1SQT3 F1SQT3 | 12            | 8          | 3          | 2              | 3              | 4              | 1              | 0              | 40         | 73         | 26             | 8              | 7              | 9              | 5                 | 0          | 31.7%      | 16.4%          | 9.4%           | 7.5%           | 10.8%          | 8.9%  | 3.1%  | 0.0%  |       |
| tr F1SKE2 F1SKE2 | 8             | 7          | 0          | 1              | 1              | 3              | 0              | 0              | 14         | 19         | 0              | 2              | 1              | 4              | 0                 | 0          | 9.6%       | 10.6%          | 0.0%           | 2.5%           | 2.6%           | 5.1%  | 0.0%  | 0.0%  |       |
| P62901           | 5             | 3          | 3          | 1              | 1              | 1              | 0              | 0              | 20         | 18         | 6              | 3              | 4              | 1              | 0                 | 0          | 20.8%      | 26.4%          | 25.6%          | 11.2%          | 11.2%          | 11.2% | 0.0%  | 0.0%  |       |
| tr F1STY9 F1STY9 | 1             | 2          | 0          | 1              | 1              | 0              | 0              | 0              | 10         | 9          | 0              | 2              | 2              | 0              | 0                 | 0          | 10.3%      | 10.3%          | 0.0%           | 10.3%          | 10.3%          | 0.0%  | 0.0%  | 0.0%  |       |
| tr F1RIU3 F1RIU3 | 31            | 8          | 15         | 1              | 5              | 3              | 8              | 12             | 166        | 181        | 147            | 42             | 27             | 4              | 53                | 56         | 55.4%      | 28.4%          | 28.1%          | 2.4%           | 18.3%          | 7.7%  | 25.8% | 29.4% |       |
| Q6QAT0           | 2             | 9          | 1          | 1              | 1              | 3              | 0              | 0              | 4          | 77         | 11             | 5              | 1              | 11             | 0                 | 0          | 17.0%      | 46.7%          | 9.6%           | 10.4%          | 11.9%          | 12.6% | 0.0%  | 0.0%  |       |
| tr F1RGM3 F1RGM3 | 4             | 2          | 2          | 1              | 1              | 0              | 1              | 1              | 8          | 16         | 12             | 2              | 3              | 0              | 4                 | 1          | 43.9%      | 17.1%          | 20.3%          | 8.1%           | 8.1%           | 0.0%  | 15.4% | 15.4% |       |
| tr A4L2Z4 A4L2Z4 | 3             | 2          | 0          | 0              | 3              | 2              | 3              | 3              | 18         | 40         | 0              | 0              | 4              | 8              | 34                | 28         | 10.1%      | 4.2%           | 0.0%           | 0.0%           | 10.1%          | 4.2%  | 9.6%  | 10.1% |       |
| tr F1SNB6 F1SNB6 | 1             | 2          | 0          | 1              | 1              | 1              | 1              | 1              | 33         | 103        | 0              | 10             | 10             | 8              | 18                | 1          | 9.1%       | 9.1%           | 0.0%           | 9.1%           | 9.1%           | 9.1%  | 9.1%  | 9.1%  |       |
| P17741           | 12            | 5          | 5          | 1              | 1              | 1              | 0              | 1              | 32         | 32         | 33             | 9              | 3              | 1              | 0                 | 1          | 31.4%      | 25.7%          | 20.0%          | 5.7%           | 5.7%           | 5.7%  | 0.0%  | 6.7%  |       |
| tr I3LK33 I3LK33 | 6             | 10         | 1          | 0              | 4              | 4              | 0              | 2              | 28         | 106        | 10             | 0              | 5              | 22             | 0                 | 6          | 19.1%      | 31.9%          | 6.9%           | 0.0%           | 13.7%          | 14.7% | 0.0%  | 5.9%  |       |
| P79324           | 6             | 10         | 1          | 0              | 4              | 4              | 0              | 2              | 28         | 106        | 10             | 0              | 5              | 22             | 0                 | 6          | 25.5%      | 42.5%          | 9.2%           | 0.0%           | 18.3%          | 19.6% | 0.0%  | 7.8%  |       |
| tr F1S232 F1S232 | 15            | 16         | 17         | 3              | 3              | 2              | 9              | 7              | 34         | 56         | 127            | 7              | 7              | 4              | 62                | 24         | 33.4%      | 36.1%          | 19.2%          | 7.4%           | 10.5%          | 3.7%  | 23.6% | 14.0% |       |
| tr F1RGC0 F1RGC0 | 9             | 5          | 2          | 1              | 4              | 1              | 0              | 1              | 33         | 22         | 15             | 4              | 6              | 1              | 0                 | 6          | 41.2%      | 37.8%          | 15.5%          | 14.9%          | 31.1%          | 14.9% | 0.0%  | 14.9% |       |
| tr F1SIH5 F1SIH5 | 10            | 1          | 4          | 2              | 1              | 0              | 0              | 0              | 17         | 3          | 169            | 3              | 1              | 0              | 0                 | 0          | 49.2%      | 8.1%           | 23.9%          | 8.4%           | 8.4%           | 0.0%  | 0.0%  | 0.0%  |       |
| tr I3LK71 I3LK71 | 4             | 5          | 5          | 1              | 1              | 0              | 2              | 2              | 7          | 8          | 34             | 1              | 2              | 0              | 7                 | 5          | 16.6%      | 16.3%          | 13.4%          | 3.9%           | 3.9%           | 0.0%  | 9.1%  | 15.3% |       |
| tr F1RQS8 F1RQS8 | 0             | 1          | 0          | 1              | 1              | 0              | 0              | 0              | 0          | 15         | 0              | 1              | 2              | 0              | 0                 | 0          | 0.0%       | 6.5%           | 0.0%           | 6.5%           | 6.5%           | 0.0%  | 0.0%  | 0.0%  |       |
| tr F1RIJ7 F1RIJ7 | 2             | 0          | 0          | 0              | 0              | 2              | 1              | 1              | 10         | 0          | 0              | 0              | 0              | 2              | 2                 | 7          | 19.3%      | 0.0%           | 0.0%           | 0.0%           | 0.0%           | 19.3% | 19.3% | 19.3% |       |
| tr F1S6Z3 F1S6Z3 | 4             | 1          | 4          | 1              | 0              | 0              | 3              | 2              | 8          | 2          | 36             | 2              | 0              | 0              | 13                | 12         | 49.4%      | 16.0%          | 27.2%          | 16.0%          | 0.0%           | 0.0%  | 45.7% | 29.6% |       |
| tr I3LU51 I3LU51 | 5             | 1          | 5          | 0              | 2              | 0              | 1              | 4              | 6          | 4          | 16             | 0              | 2              | 0              | 4                 | 6          | 10.9%      | 2.2%           | 6.8%           | 0.0%           | 2.5%           | 0.0%  | 2.2%  | 10.4% |       |
| tr Q6Q781 Q6Q781 | 5             | 0          | 3          | 1              | 0              | 0              | 1              | 3              | 10         | 0          | 18             | 2              | 0              | 0              | 1                 | 4          | 16.0%      | 0.0%           | 9.3%           | 3.1%           | 0.0%           | 0.0%  | 4.2%  | 10.6% |       |
| tr I3LC53 I3LC53 | 0             | 1          | 0          | 1              | 1              | 0              | 0              | 0              | 0          | 10         | 0              | 1              | 1              | 0              | 0                 | 0          | 0.0%       | 3.6%           | 0.0%           | 3.6%           | 3.6%           | 0.0%  | 0.0%  | 0.0%  |       |
| tr I3LSG2 I3LSG2 | 0             | 1          | 0          | 1              | 1              | 0              | 0              | 0              | 0          | 10         | 0              | 1              | 1              | 0              | 0                 | 0          | 0.0%       | 4.7%           | 0.0%           | 4.7%           | 4.7%           | 0.0%  | 0.0%  | 0.0%  |       |
| tr F1RGM8 F1RGM8 | 6             | 2          | 0          | 0              | 2              | 0              | 0              | 0              | 8          | 2          | 0              | 0              | 2              | 0              | 0                 | 0          | 5.7%       | 2.8%           | 0.0%           | 0.0%           | 1.3%           | 0.0%  | 0.0%  | 0.0%  |       |
| tr F1RFG9 F1RFG9 | 1             | 1          | 0          | 0              | 2              | 0              | 0              | 0              | 2          | 8          | 0              | 0              | 2              | 0              | 0                 | 0          | 4.4%       | 1.3%           | 0.0%           | 0.0%           | 5.8%           | 0.0%  | 0.0%  | 0.0%  |       |
| tr F1S4E0 F1S4E0 | 1             | 2          | 0          | 0              | 1              | 1              | 0              | 0              | 1          | 9          | 0              | 0              | 1              | 1              | 0                 | 0          | 2.6%       | 2.6%           | 0.0%           | 0.0%           | 2.6%           | 2.6%  | 0.0%  | 0.0%  |       |
| Q27HV0           | 9             | 1          | 1          | 0              | 1              | 0              | 0              | 0              | 9          | 1          | 4              | 0              | 2              | 0              | 0                 | 0          | 12.0%      | 1.1%           | 1.3%           | 0.0%           | 1.9%           | 0.0%  | 0.0%  | 0.0%  |       |
| tr F1RSV2 F1RSV2 | 9             | 1          | 1          | 0              | 1              | 0              | 0              | 0              | 9          | 1          | 4              | 0              | 2              | 0              | 0                 | 0          | 12.0%      | 1.1%           | 1.3%           | 0.0%           | 1.9%           | 0.0%  | 0.0%  | 0.0%  |       |
| tr F1SV89 F1SV89 | 4             | 2          | 3          | 0              | 1              | 0              | 0              | 0              | 7          | 3          | 14             | 0              | 2              | 0              | 0                 | 0          | 13.8%      | 6.6%           | 10.7%          | 0.0%           | 2.3%           | 0.0%  | 0.0%  | 0.0%  |       |
| tr K7GRT9 K7GRT9 | 3             | 0          | 0          | 0              | 1              | 0              | 1              | 5              | 5          | 0          | 0              | 0              | 1              | 0              | 1                 | 57         | 11.0%      | 0.0%           | 0.0%           | 0.0%           | 3.9%           | 0.0%  | 5.7%  | 23.7% |       |
| tr F1RYZ1 F1RYZ1 | 3             | 0          | 0          | 0              | 1              | 0              | 1              | 5              | 5          | 0          | 0              | 0              | 1              | 0              | 1                 | 57         | 9.9%       | 0.0%           | 0.0%           | 0.0%           | 3.6%           | 0.0%  | 5.1%  | 21.3% |       |
| tr K7GR53 K7GR53 | 3             | 0          | 0          | 0              | 1              | 0              | 0              | 3              | 5          | 0          | 0              | 0              | 1              | 0              | 0                 | 0          | 52         | 16.3%          | 0.0%           | 0.0%           | 0.0%           | 5.9%  | 0.0%  | 0.0%  | 16.3% |
| tr K7GRB8 K7GRB8 | 3             | 0          | 0          | 0              | 1              | 0              | 0              | 3              | 5          | 0          | 0              | 0              | 1              | 0              | 0                 | 52         | 12.3%      | 0.0%           | 0.0%           | 0.0%           | 4.4%           | 0.0%  | 0.0%  | 12.3% |       |
| tr F1RRE1 F1RRE1 | 1             | 2          | 2          | 0              | 1              | 0              | 1              | 2              | 1          | 4          | 4              | 0              | 1              | 0              | 24                | 7          | 8.7%       | 6.0%           | 17.9%          | 0.0%           | 5.4%           | 0.0%  | 9.2%  | 14.7% |       |
| tr I3LI77 I3LI77 | 3             | 0          | 2          | 1              | 0              | 0              | 2              | 7              | 5          | 0          | 31             | 1              | 0              | 0              | 48                | 45         | 8.9%       | 0.0%           | 4.2%           | 1.9%           | 0.0%           | 0.0%  | 10.4% | 13.2% |       |
| tr I3LKF8 I3LKF8 | 3             | 0          | 3          | 0              | 0              | 1              | 0              | 5              | 5          | 0          | 7              | 0              | 0              | 1              | 0                 | 25         | 12.3%      | 0.0%           | 11.9%          | 0.0%           | 0.0%           | 2.3%  | 0.0%  | 20.9% |       |
| tr F1SMN6 F1SMN6 | 3             | 0          | 0          | 0              | 1              | 0              | 1              | 2              | 5          | 0          | 0              | 0              | 1              | 0              | 3                 | 6          | 26.9%      | 0.0%           | 0.0%           | 0.0%           | 14.3%          | 0.0%  | 14.3% | 16.0% |       |
| tr K7GNE9 K7GNE9 | 0             | 1          | 0          | 1              | 0              | 0              | 0              | 4              | 0          | 5          | 0              | 1              | 0              | 0              | 0                 | 8          | 0.0%       | 1.4%           | 0.0%           | 1.4%           | 0.0%           | 0.0%  | 0.0%  | 17.4% |       |
| tr F1RN78 F1RN78 | 0             | 1          | 0          | 1              | 0              | 0              | 0              | 4              | 0          | 5          | 0              | 1              | 0              | 0              | 0                 | 8          | 0.0%       | 1.2%           | 0.0%           | 1.2%           | 0.0%           | 0.0%  | 0.0%  | 15.1% |       |
| tr K7GQD0 K7GQD0 | 1             | 1          | 2          | 0              | 1              | 0              | 1              | 1              | 2          | 3          | 23             | 0              | 1              | 0              | 36                | 6          | 43.2%      | 43.2%          | 43.2%          | 0.0%           | 43.2%          | 0.0%  | 43.2% | 43.2% |       |
| tr F1S7N7 F1S7N7 | 2             | 1          | 0          | 0              | 1              | 0              | 1              | 0              | 4          | 1          | 0              | 0              | 1              | 0              | 6                 | 0          | 38.7%      | 18.5%          | 0.0%           | 0.0%           | 18.5%          | 0.0%  | 18.5% | 0.0%  |       |
| tr I3LVK2 I3LVK2 | 3             | 0          | 2          | 0              | 1              | 0              | 0              | 1              | 5          | 0          | 7              | 0              | 1              | 0              | 0                 | 4          | 10.2%      | 0.0%           | 6.4%           | 0.0%           | 6.1%           | 0.0%  | 0.0%  | 4.1%  |       |
| Q5FY69           | 2             | 0          | 1          | 1              | 0              | 0              | 0              | 1              | 5          | 0          | 8              | 1              | 0              | 0              | 0                 | 3          | 5.4%       | 0.0%           | 2.8%           | 1.8%           | 0.0%           | 0.0%  | 0.0%  | 2.5%  |       |
| tr F1S432 F1S432 | 4             | 1          | 0          | 0              | 1              | 0              | 0              | 0              | 4          | 1          | 0              | 0              | 1              | 0              | 0                 | 0          | 11.2%      | 2.1%           | 0.0%           | 0.0%           | 2.1%           | 0.0%  | 0.0%  | 0.0%  |       |
| tr I3LTA9 I3LTA9 | 0             | 2          | 0          | 0              | 1              | 0              | 0              | 0              | 0          | 5          | 0              | 0              | 1              | 0              | 0                 | 0          | 0.0%       | 4.2%           | 0.0%           | 0.0%           | 1.5%           | 0.0%  | 0.0%  | 0.0%  |       |
| tr F1SR18 F1SR18 | 0             | 1          | 0          | 0              | 1              | 0              | 0              | 0              | 0          | 5          | 0              | 0              | 1              | 0              | 0                 | 0          | 0.0%       | 1.6%           | 0.0%           | 0.0%           | 1.6%           | 0.0%  | 0.0%  | 0.0%  |       |
| tr F1SSS0 F1SSS0 | 1             | 2          | 0          | 0              | 0              | 1              | 0              | 0              | 1          | 4          | 0              | 0              | 0              | 1              | 0                 | 0          | 1.9%       | 1.9%           | 0.0%           | 0.0%           | 0.0%           | 1.0%  | 0.0%  | 0.0%  |       |
| tr F1SFE4 F1SFE4 | 0             | 1          | 0          | 0              | 1              | 0              | 0              | 0              | 0          | 5          | 0              | 0              | 1              | 0              | 0                 | 0          | 0.0%       | 6.0%           | 0.0%           | 0.0%           | 6.0%           | 0.0%  | 0.0%  | 0.0%  |       |
| tr F1SAY6 F1SAY6 | 2             | 1          | 0          | 0              | 1              | 0              | 0              | 0              | 4          | 1          | 0              | 0              | 1              | 0              | 0                 | 0          | 6.3%       | 2.9%           | 0.0%           | 0.0%           | 3.3%           | 0.0%  | 0.0%  | 0.0%  |       |
| tr F2Z5P0 F2Z5P0 | 1             | 1          | 0          | 0              | 0              | 1              | 0              | 0              | 2          | 3          | 0              | 0              | 0              | 1              | 0                 | 0          | 15.6%      | 15.6%          | 0.0%           | 0.0%           | 0.0%           | 15.6% | 0.0%  | 0.0%  |       |
| tr F1RQW2 F1RQW2 | 2             | 1          | 0          | 1              | 0              | 0              | 0              | 0              | 2          | 3          | 0              | 1              | 0              | 0              | 0                 | 0          | 2.4%       | 0.5%           | 0.0%           | 0.5%           | 0.0%           | 0.0%  | 0.0%  | 0.0%  |       |
| tr F1RSN2 F1RSN2 | 0             | 1          | 0          | 1              | 0              | 0              | 0              | 0              | 0          | 5          | 0              | 1              | 0              | 0              | 0                 | 0          | 0.0%       | 2.1%           | 0.0%           | 2.1%           | 0.0%           | 0.0%  | 0.0%  | 0.0%  |       |
| tr F1RZD2 F1RZD2 | 3             | 2          | 0          | 0              | 1              | 0              | 0              | 0              | 3          | 2          | 0              | 0              | 0              | 1              | 0                 | 0          | 2.5%       | 0.8%           | 0.0%           | 0.0%           | 0.8%           | 0.0%  | 0.0%  | 0.0%  |       |
| tr F1REY1 F1REY1 | 1             | 2          | 0          | 0              | 0              | 1              | 0              | 0              | 1          | 4          | 0              | 0              | 0              | 1              | 0                 | 0          | 8.8%       | 13.2%          | 0.0%           | 0.0%           | 0.0%           | 4.4%  | 0.0%  | 0.0%  |       |
| tr I3LCH3 I3LCH3 | 1             | 2          | 0          | 0              | 1              | 0              | 0              | 0              | 1          | 4          | 0              | 0              | 1              | 0              | 0                 | 0          | 9.1%       | 15.6%          | 0.0%           | 0.0%           | 9.1%           | 0.0%  | 0.0%  | 0.0%  |       |
| tr F1RK18 F1RK18 | 4             | 0          | 1          | 1              | 0              | 0              | 0              | 0              | 5          | 0          | 1              | 1              | 0              | 0              | 0                 | 0          | 10.1%      | 0.0%           | 5.0%           | 3.0%           | 0.0%           | 0.0%  | 0.0%  | 0.0%  |       |
| P19619           | 35            | 35         | 20         | 11             | 17             | 11             | 14             | 16             | 567        | 1330       | 1305           | 192            | 126            | 61             | 452               | 514        | 58.1%      | 61.8%          | 40.8%          | 34.7%          | 48.0%          | 27.2% | 35.3% | 37.9% |       |
| Q29092           | 61            | 22         | 40         | 7              | 11             | 11             | 7              | 16             | 246        | 115        | 312            | 26             | 26             | 20             | 64                | 101        | 52.1%      | 26.5%          | 47.1%          | 9.6%           | 14.9%          | 10.8% | 15.0% | 19.4% |       |
| tr F1SA70 F1SA70 | 16            | 9          | 15         | 3              | 5              | 0              | 2              | 3              | 49         | 27         | 109            | 7              | 8              | 0              | 32                | 10         | 15.3%      | 16.0%          | 14.3%          | 6.0%           | 10.1%          | 0.0%  | 1.9%  | 3.9%  |       |
| tr F2Z5K5 F2Z5K5 | 42            | 33         | 21         | 10             | 19             | 10             | 13             | 27             | 614        | 614        | 828            | 78             | 130            | 33             | 319               | 537        | 75.0%      | 65.1%          | 61.3%          | 29.3%          | 50.5%          | 23.9% | 43.9% | 51.1% |       |
| tr F1RTY6 F1RTY6 |               |            |            |                |                |                |                |                |            |            |                |                |                |                |                   |            |            |                |                |                |                |       |       |       |       |

| Sample#          | Peptide Count |            |            |                |                |                |                | Spectral Count |            |            |                |                |                |                | Sequence Coverage |            |            |                |                |                |                |       |       |       |
|------------------|---------------|------------|------------|----------------|----------------|----------------|----------------|----------------|------------|------------|----------------|----------------|----------------|----------------|-------------------|------------|------------|----------------|----------------|----------------|----------------|-------|-------|-------|
|                  | Whole Cell    | Whole Cell | Whole Cell | Cilia Fraction | Cilia Fraction | Cilia Fraction | Cilia Fraction | Whole Cell     | Whole Cell | Whole Cell | Cilia Fraction | Cilia Fraction | Cilia Fraction | Cilia Fraction | Whole Cell        | Whole Cell | Whole Cell | Cilia Fraction | Cilia Fraction | Cilia Fraction | Cilia Fraction |       |       |       |
|                  | 1             | 2          | 6          | 4              | 3              | 5              | 7              | 8              | 1          | 2          | 6              | 4              | 3              | 5              | 7                 | 8          | 1          | 2              | 6              | 4              | 3              | 5     | 7     | 8     |
| Accession        |               |            |            |                |                |                |                |                |            |            |                |                |                |                |                   |            |            |                |                |                |                |       |       |       |
| tr K7GPV5 K7GPV5 | 7             | 3          | 4          | 1              | 1              | 0              | 0              | 0              | 10         | 6          | 27             | 1              | 2              | 0              | 0                 | 0          | 23.7%      | 11.5%          | 16.2%          | 3.1%           | 3.1%           | 0.0%  | 0.0%  | 0.0%  |
| tr F1S982 F1S982 | 18            | 9          | 6          | 1              | 3              | 1              | 3              | 3              | 34         | 41         | 36             | 3              | 10             | 1              | 17                | 6          | 30.5%      | 16.3%          | 12.5%          | 2.0%           | 5.8%           | 1.9%  | 5.6%  | 8.3%  |
| Q6QAP7           | 5             | 5          | 6          | 3              | 3              | 2              | 4              | 3              | 11         | 32         | 40             | 3              | 3              | 2              | 66                | 9          | 51.9%      | 31.1%          | 43.7%          | 23.7%          | 23.7%          | 23.7% | 40.7% | 40.7% |
| tr I3LGC6 I3LGC6 | 8             | 3          | 0          | 1              | 3              | 0              | 0              | 0              | 10         | 17         | 0              | 1              | 4              | 0              | 0                 | 0          | 5.4%       | 1.5%           | 0.0%           | 0.5%           | 1.9%           | 0.0%  | 0.0%  | 0.0%  |
| P62272           | 10            | 8          | 8          | 1              | 6              | 1              | 1              | 3              | 25         | 67         | 96             | 4              | 12             | 1              | 1                 | 16         | 48.7%      | 30.3%          | 42.8%          | 5.9%           | 31.6%          | 6.6%  | 5.3%  | 16.4% |
| tr F1S441 F1S441 | 23            | 9          | 33         | 2              | 2              | 6              | 3              | 14             | 83         | 43         | 159            | 8              | 5              | 10             | 23                | 55         | 48.4%      | 18.5%          | 41.5%          | 3.5%           | 4.9%           | 13.8% | 5.2%  | 25.6% |
| tr F1SM21 F1SM21 | 11            | 6          | 2          | 1              | 2              | 1              | 0              | 0              | 22         | 22         | 14             | 3              | 4              | 1              | 0                 | 0          | 23.8%      | 14.0%          | 3.6%           | 3.0%           | 3.0%           | 3.0%  | 0.0%  | 0.0%  |
| tr K7GQ61 K7GQ61 | 6             | 3          | 4          | 1              | 1              | 1              | 1              | 1              | 13         | 9          | 62             | 2              | 1              | 1              | 17                | 19         | 41.4%      | 17.9%          | 22.8%          | 8.6%           | 8.6%           | 9.3%  | 9.3%  |       |
| tr F1RRW8 F1RRW8 | 4             | 4          | 0          | 1              | 1              | 0              | 0              | 2              | 10         | 12         | 0              | 1              | 3              | 0              | 0                 | 4          | 4.3%       | 3.1%           | 0.0%           | 1.7%           | 1.7%           | 0.0%  | 0.0%  | 2.6%  |
| tr F1SMG8 F1SMG8 | 4             | 3          | 0          | 1              | 1              | 0              | 0              | 0              | 7          | 15         | 0              | 2              | 2              | 0              | 0                 | 0          | 16.1%      | 5.5%           | 0.0%           | 3.3%           | 3.3%           | 0.0%  | 0.0%  | 0.0%  |
| Q7Y591           | 2             | 5          | 0          | 2              | 1              | 1              | 0              | 0              | 2          | 20         | 0              | 2              | 1              | 1              | 0                 | 0          | 5.2%       | 9.7%           | 0.0%           | 3.8%           | 1.6%           | 2.2%  | 0.0%  | 0.0%  |
| tr F1ST64 F1ST64 | 2             | 5          | 0          | 2              | 1              | 1              | 0              | 0              | 2          | 20         | 0              | 2              | 1              | 1              | 0                 | 0          | 5.2%       | 9.7%           | 0.0%           | 3.8%           | 1.6%           | 2.2%  | 0.0%  | 0.0%  |
| tr F1S9B3 F1S9B3 | 2             | 3          | 0          | 1              | 1              | 0              | 0              | 0              | 2          | 20         | 0              | 1              | 3              | 0              | 0                 | 0          | 7.8%       | 9.1%           | 0.0%           | 3.4%           | 3.4%           | 0.0%  | 0.0%  | 0.0%  |
| tr I3L9S9 I3L9S9 | 4             | 5          | 0          | 0              | 2              | 1              | 0              | 0              | 5          | 17         | 0              | 0              | 3              | 1              | 0                 | 0          | 4.6%       | 4.0%           | 0.0%           | 0.0%           | 1.7%           | 0.9%  | 0.0%  | 0.0%  |
| tr F2Z5G3 F2Z5G3 | 3             | 1          | 1          | 0              | 2              | 0              | 2              | 5              | 10         | 1          | 2              | 0              | 2              | 0              | 19                | 22         | 36.2%      | 10.7%          | 11.4%          | 0.0%           | 10.7%          | 0.0%  | 24.8% | 51.0% |
| tr I3L7I0 I3L7I0 | 4             | 2          | 1          | 0              | 1              | 0              | 0              | 1              | 9          | 2          | 1              | 0              | 2              | 0              | 0                 | 1          | 18.1%      | 2.8%           | 7.7%           | 0.0%           | 6.8%           | 0.0%  | 0.0%  | 7.7%  |
| tr F1RYS7 F1RYS7 | 1             | 1          | 0          | 1              | 1              | 0              | 0              | 0              | 1          | 10         | 0              | 1              | 1              | 0              | 0                 | 0          | 1.3%       | 0.6%           | 0.0%           | 0.6%           | 0.6%           | 0.0%  | 0.0%  | 0.0%  |
| tr F1SRR5 F1SRR5 | 2             | 2          | 3          | 0              | 1              | 1              | 0              | 0              | 2          | 9          | 8              | 0              | 1              | 1              | 0                 | 0          | 0.6%       | 0.4%           | 1.0%           | 0.0%           | 0.3%           | 0.2%  | 0.0%  | 0.0%  |
| tr I3LTM2 I3LTM2 | 2             | 2          | 3          | 0              | 1              | 1              | 0              | 0              | 2          | 9          | 8              | 0              | 1              | 1              | 0                 | 0          | 0.6%       | 0.4%           | 1.0%           | 0.0%           | 0.3%           | 0.2%  | 0.0%  | 0.0%  |
| tr I3LEW5 I3LEW5 | 26            | 13         | 10         | 1              | 5              | 2              | 3              | 6              | 59         | 47         | 43             | 1              | 14             | 4              | 17                | 27         | 42.7%      | 20.6%          | 14.9%          | 2.2%           | 6.2%           | 2.2%  | 6.2%  | 7.0%  |
| tr F1SAD7 F1SAD7 | 5             | 3          | 0          | 1              | 1              | 0              | 0              | 0              | 5          | 23         | 0              | 3              | 2              | 0              | 0                 | 0          | 9.5%       | 4.1%           | 0.0%           | 1.2%           | 1.2%           | 0.0%  | 0.0%  | 0.0%  |
| tr F1RJN6 F1RJN6 | 8             | 6          | 5          | 1              | 3              | 2              | 0              | 1              | 14         | 155        | 39             | 2              | 19             | 9              | 0                 | 2          | 21.5%      | 14.5%          | 13.4%          | 2.5%           | 8.1%           | 3.1%  | 0.0%  | 3.6%  |
| tr F1S0P4 F1S0P4 | 2             | 3          | 3          | 1              | 2              | 0              | 0              | 0              | 2          | 32         | 10             | 2              | 4              | 0              | 0                 | 0          | 4.7%       | 6.9%           | 8.5%           | 2.0%           | 6.9%           | 0.0%  | 0.0%  | 0.0%  |
| tr F1RFX9 F1RFX9 | 8             | 8          | 3          | 0              | 3              | 3              | 0              | 0              | 15         | 19         | 23             | 0              | 3              | 3              | 0                 | 0          | 36.2%      | 19.9%          | 13.7%          | 0.0%           | 12.7%          | 10.7% | 0.0%  | 0.0%  |
| tr F1RKM1 F1RKM1 | 4             | 1          | 2          | 1              | 1              | 0              | 1              | 2              | 13         | 4          | 13             | 1              | 2              | 0              | 1                 | 6          | 15.8%      | 3.2%           | 9.4%           | 3.2%           | 3.2%           | 0.0%  | 3.2%  | 3.9%  |
| tr F1RGQ6 F1RGQ6 | 4             | 4          | 0          | 0              | 2              | 1              | 0              | 1              | 4          | 13         | 0              | 0              | 2              | 1              | 0                 | 1          | 5.3%       | 4.4%           | 0.0%           | 0.0%           | 3.9%           | 2.0%  | 0.0%  | 2.0%  |
| tr I3LLT4 I3LLT4 | 1             | 1          | 0          | 1              | 0              | 1              | 0              | 0              | 2          | 15         | 0              | 2              | 0              | 1              | 0                 | 0          | 8.1%       | 8.1%           | 0.0%           | 8.1%           | 0.0%           | 8.1%  | 0.0%  | 0.0%  |
| P05383           | 5             | 2          | 2          | 1              | 1              | 0              | 0              | 1              | 10         | 7          | 11             | 1              | 2              | 0              | 0                 | 1          | 17.4%      | 10.0%          | 8.3%           | 3.7%           | 3.7%           | 0.0%  | 0.0%  | 3.7%  |
| Q29599           | 8             | 7          | 8          | 1              | 3              | 2              | 1              | 1              | 14         | 157        | 42             | 2              | 19             | 9              | 6                 | 2          | 25.5%      | 21.5%          | 24.4%          | 2.6%           | 8.3%           | 3.2%  | 6.6%  | 3.7%  |
| tr F1SB63 F1SB63 | 29            | 23         | 16         | 3              | 8              | 2              | 11             | 15             | 82         | 90         | 77             | 8              | 19             | 3              | 131               | 65         | 58.8%      | 47.1%          | 34.9%          | 5.8%           | 23.4%          | 7.4%  | 37.1% | 36.5% |
| tr F1S935 F1S935 | 8             | 12         | 3          | 1              | 6              | 2              | 1              | 2              | 24         | 108        | 6              | 2              | 19             | 2              | 1                 | 6          | 22.8%      | 34.8%          | 10.7%          | 4.0%           | 17.0%          | 8.5%  | 6.2%  | 10.7% |
| tr I3L7B0 I3L7B0 | 2             | 2          | 0          | 0              | 1              | 2              | 0              | 2              | 19         | 27         | 0              | 0              | 1              | 7              | 0                 | 6          | 6.9%       | 7.5%           | 0.0%           | 0.0%           | 6.9%           | 6.9%  | 0.0%  | 11.6% |
| tr I3L5H6 I3L5H6 | 4             | 1          | 3          | 0              | 2              | 1              | 0              | 0              | 6          | 17         | 8              | 0              | 2              | 2              | 0                 | 0          | 6.2%       | 1.5%           | 5.2%           | 0.0%           | 3.4%           | 1.9%  | 0.0%  | 0.0%  |
| Q29205           | 13            | 10         | 2          | 3              | 5              | 3              | 1              | 1              | 26         | 223        | 15             | 10             | 28             | 5              | 5                 | 12         | 50.0%      | 32.6%          | 11.8%          | 25.8%          | 30.9%          | 9.6%  | 4.5%  | 4.5%  |
| tr Q2EN77 Q2EN77 | 1             | 3          | 5          | 1              | 2              | 1              | 0              | 1              | 3          | 26         | 33             | 2              | 2              | 1              | 0                 | 7          | 15.9%      | 18.5%          | 15.9%          | 8.6%           | 18.5%          | 8.6%  | 0.0%  | 15.9% |
| tr Q3IA98 Q3IA98 | 4             | 5          | 1          | 2              | 4              | 3              | 0              | 2              | 106        | 312        | 7              | 4              | 37             | 31             | 0                 | 49         | 49.0%      | 61.2%          | 20.4%          | 49.0%          | 61.2%          | 40.8% | 0.0%  | 28.6% |
| P03974           | 38            | 22         | 30         | 3              | 3              | 6              | 7              | 11             | 127        | 94         | 240            | 16             | 11             | 11             | 82                | 66         | 53.6%      | 26.1%          | 34.5%          | 4.7%           | 17.2%          | 2.0%  | 13.9% | 19.7% |
| tr I3LPL7 I3LPL7 | 21            | 5          | 14         | 1              | 3              | 3              | 3              | 8              | 41         | 41         | 92             | 5              | 6              | 3              | 6                 | 26         | 19.6%      | 4.5%           | 15.4%          | 0.8%           | 2.0%           | 3.1%  | 7.2%  | 10.3% |
| tr I3LK07 I3LK07 | 6             | 5          | 1          | 1              | 2              | 1              | 1              | 1              | 50         | 120        | 169            | 10             | 11             | 8              | 18                | 1          | 30.0%      | 30.0%          | 11.5%          | 9.2%           | 20.8%          | 9.2%  | 9.2%  | 9.2%  |
| tr F1S2E5 F1S2E5 | 6             | 5          | 1          | 1              | 2              | 1              | 1              | 1              | 50         | 120        | 169            | 10             | 11             | 8              | 18                | 1          | 23.9%      | 23.9%          | 9.2%           | 7.4%           | 16.6%          | 7.4%  | 7.4%  | 7.4%  |
| tr I3LJP6 I3LJP6 | 6             | 5          | 1          | 1              | 2              | 1              | 1              | 1              | 50         | 120        | 169            | 10             | 11             | 8              | 18                | 1          | 29.5%      | 29.5%          | 11.4%          | 9.1%           | 20.5%          | 9.1%  | 9.1%  | 9.1%  |
| P00355           | 43            | 43         | 19         | 11             | 22             | 12             | 12             | 20             | 947        | 614        | 1982           | 44             | 187            | 35             | 1328              | 819        | 76.6%      | 87.4%          | 39.6%          | 36.3%          | 59.8%          | 27.3% | 40.2% | 54.1% |
| Q29024           | 13            | 9          | 6          | 2              | 3              | 3              | 4              | 3              | 33         | 61         | 39             | 6              | 7              | 3              | 27                | 10         | 31.1%      | 16.6%          | 15.9%          | 4.9%           | 7.7%           | 5.1%  | 10.3% | 9.8%  |
| tr I3LD74 I3LD74 | 14            | 11         | 3          | 3              | 5              | 3              | 1              | 1              | 28         | 226        | 23             | 10             | 28             | 5              | 5                 | 12         | 55.1%      | 37.6%          | 16.9%          | 25.8%          | 30.9%          | 9.6%  | 4.5%  | 4.5%  |
| tr F1RU33 F1RU33 | 4             | 3          | 5          | 1              | 1              | 1              | 1              | 2              | 31         | 117        | 298            | 4              | 14             | 7              | 50                | 21         | 53.9%      | 14.6%          | 48.3%          | 13.5%          | 13.5%          | 13.5% | 13.5% | 40.4% |
| P02554           | 53            | 37         | 23         | 12             | 23             | 11             | 16             | 32             | 798        | 662        | 1487           | 62             | 143            | 40             | 513               | 728        | 80.2%      | 74.4%          | 66.1%          | 31.9%          | 51.2%          | 23.8% | 46.5% | 56.4% |
| P79403           | 26            | 13         | 11         | 4              | 5              | 4              | 5              | 13             | 74         | 105        | 70             | 11             | 11             | 8              | 21                | 43         | 27.9%      | 14.4%          | 16.3%          | 5.9%           | 6.8%           | 5.5%  | 11.1% | 15.7% |
| tr F1SIH8 F1SIH8 | 40            | 22         | 34         | 3              | 6              | 7              | 13             | 13             | 133        | 94         | 260            | 16             | 11             | 11             | 82                | 91         | 55.7%      | 26.0%          | 36.6%          | 4.7%           | 1.7%           | 2.0%  | 13.9% | 21.9% |
| tr I3LHN3 I3LHN3 | 27            | 13         | 11         | 4              | 5              | 4              | 5              | 13             | 75         | 105        | 70             | 11             | 11             | 8              | 21                | 42         | 30.6%      | 14.4%          | 16.3%          | 5.9%           | 6.8%           | 5.5%  | 11.1% | 15.7% |
| Q9GLV6           | 18            | 12         | 5          | 1              | 2              | 3              | 1              | 0              | 33         | 33         | 15             | 2              | 6              | 3              | 1                 | 0          | 24.7%      | 14.0%          | 6.3%           | 1.6%           | 4.3%           | 3.0%  | 1.6%  | 0.0%  |
| tr I3LRU5 I3LRU5 | 8             | 3          | 1          | 1              | 1              | 1              | 2              | 1              | 13         | 35         | 1              | 3              | 3              | 2              | 4                 | 5          | 25.6%      | 8.4%           | 5.0%           | 2.3%           | 2.3%           | 2.3%  | 5.0%  | 6.1%  |
| tr I3L945 I3L945 | 8             | 3          | 3          | 1              | 1              | 1              | 2              | 1              | 13         | 35         | 5              | 3              | 3              | 2              | 4                 | 5          | 25.0%      | 8.2%           | 11.9%          | 2.3%           | 2.3%           | 2.3%  | 4.9%  | 5.9%  |
| tr F2Z5B1 F2Z5B1 | 8             | 2          | 2          | 1              | 1              | 0              | 1              | 4              | 15         | 9          | 8              | 2              | 2              | 0              | 6                 | 7          | 29.6%      | 2.6%           | 5.8%           | 2.6%           | 2.6%           | 0.0%  | 5.3%  | 17.5% |
| P80229           | 8             | 2          | 2          | 1              | 1              | 0              | 1              | 4              | 15         | 9          | 8              | 2              | 2              | 0              | 6                 | 7          | 29.6%      | 2.6%           | 5.8%           | 2.6%           | 2.6%           | 0.0%  | 5.3%  | 17.5% |
| tr F1RHW4 F1RHW4 | 7             | 1          | 1          | 0              | 2              | 1              | 3              | 13             | 17         | 1          | 2              | 0              | 2              | 1              | 36                | 112        | 41.7%      | 6.9%           | 7.3%           | 0.0%           | 18.8%          | 6.9%  | 20.2% | 60.6% |
| tr F8S319 F8S319 | 5             | 1          | 0          | 0              | 1              | 2              | 1              | 4              | 17         | 1          | 0              | 0              | 1              | 2              | 4                 | 12         | 20.4%      | 3.1%           | 0.0%           | 0.0%           | 6.1%           | 3.2%  | 2.3%  | 8.2%  |
| tr F1SMM0 F1SMM0 | 7             | 4          | 2          | 0              | 1              | 2              | 3              | 3              | 11         | 7          | 9              | 0              | 1              | 2              | 10                | 5          | 8.3%       | 4.5%           | 2.8%           | 0.0%           | 1.8%           | 3.4%  | 3.8%  | 3.2%  |
| tr I3LGJ8 I3LGJ8 | 1             | 3          | 0          | 1              | 1              | 1              | 0              | 0              | 2          | 16         | 0              | 1              | 1              | 1              | 0                 | 0          | 3.2%       | 7.4%           | 0.0%           | 4.6%           | 4.6%           | 2.8%  | 0.0%  | 0.0%  |
| tr I3L7T9 I3L7T9 | 5             | 5          | 3          | 0              | 0              | 1              | 0              | 0              | 8          | 10         | 9              | 0              | 0              | 3              | 0                 | 0          | 25.1%      | 19.4%          | 4.5%           | 0.0%           | 0.0%           | 8.2%  | 0.0%  | 0.0%  |
| tr I3LKZ4 I3LKZ4 | 8             | 4          | 5          | 1              | 1              | 0              | 0              | 0              | 12         | 6          | 22             | 1              | 2              | 0              | 0                 | 0          | 18.9%      | 6.8%           | 9.0%           | 1.7%           | 1.7%           | 0.0%  | 0.0%  | 0.0%  |
| tr I3LVL9 I3LVL9 | 3             | 3          | 3          | 1              | 1              | 0              | 1              | 2              | 6          | 6          | 29             | 1              | 1              | 0              | 3                 | 7          | 7.4%       | 16.3%          | 11.1%          | 6.9%           | 6.9%           | 0.0%  | 6.9%  | 12.3% |
| tr F1SH51 F1SH51 | 6             | 2          | 0          | 0              | 1              | 0              | 0              | 0              | 9          | 3          | 0              | 0              |                |                |                   |            |            |                |                |                |                |       |       |       |

| Accession          | Sample# | Peptide Count |            |            |                |                |                |                | Spectral Count |            |            |                |                |                |                |                | Sequence Coverage |            |            |                |                |                |                |                |       |
|--------------------|---------|---------------|------------|------------|----------------|----------------|----------------|----------------|----------------|------------|------------|----------------|----------------|----------------|----------------|----------------|-------------------|------------|------------|----------------|----------------|----------------|----------------|----------------|-------|
|                    |         | Whole Cell    | Whole Cell | Whole Cell | Cilia Fraction | Cilia Fraction | Cilia Fraction | Cilia Fraction | Whole Cell     | Whole Cell | Whole Cell | Cilia Fraction | Whole Cell        | Whole Cell | Whole Cell | Cilia Fraction |       |
|                    |         | 1             | 2          | 6          | 4              | 3              | 5              | 7              | 8              | 1          | 2          | 6              | 4              | 3              | 5              | 7              | 8                 | 1          | 2          | 6              | 4              | 3              | 5              | 7              | 8     |
| tr F1SSU6 F1SSU6   |         | 1             | 3          | 1          | 0              | 1              | 0              | 0              | 0              | 1          | 5          | 6              | 0              | 1              | 0              | 0              | 0                 | 2.1%       | 5.4%       | 1.2%           | 0.0%           | 1.7%           | 0.0%           | 0.0%           | 0.0%  |
| Q0PIT9             |         | 4             | 0          | 2          | 0              | 0              | 1              | 1              | 1              | 6          | 0          | 105            | 0              | 0              | 1              | 4              | 1                 | 28.8%      | 0.0%       | 14.2%          | 0.0%           | 0.0%           | 9.0%           | 8.0%           | 8.0%  |
| tr A1XQ53 A1XQ53   |         | 0             | 2          | 3          | 0              | 1              | 0              | 0              | 0              | 0          | 6          | 22             | 0              | 1              | 0              | 0              | 0                 | 0.0%       | 26.8%      | 25.6%          | 0.0%           | 12.2%          | 0.0%           | 0.0%           | 0.0%  |
| tr F1RX49 F1RX49   |         | 3             | 2          | 2          | 0              | 1              | 0              | 0              | 0              | 4          | 2          | 25             | 0              | 1              | 0              | 0              | 0                 | 20.2%      | 16.7%      | 16.7%          | 0.0%           | 12.7%          | 0.0%           | 0.0%           | 0.0%  |
| tr I3LEC2 I3LEC2   |         | 15            | 8          | 7          | 3              | 3              | 1              | 4              | 6              | 52         | 51         | 42             | 8              | 7              | 2              | 28             | 15                | 72.2%      | 31.7%      | 37.6%          | 9.6%           | 9.6%           | 5.9%           | 16.3%          | 35.7% |
| tr F1RR78 F1RR78   |         | 37            | 6          | 56         | 1              | 9              | 0              | 16             | 27             | 63         | 10         | 320            | 1              | 11             | 0              | 95             | 84                | 22.3%      | 2.2%       | 25.2%          | 0.4%           | 5.6%           | 0.0%           | 11.1%          | 18.6% |
| tr F1RWF5 F1RWF5   |         | 9             | 6          | 5          | 0              | 2              | 3              | 0              | 0              | 23         | 44         | 36             | 0              | 3              | 8              | 0              | 0                 | 40.9%      | 20.2%      | 24.5%          | 0.0%           | 4.7%           | 12.5%          | 0.0%           | 0.0%  |
| tr F1SN52 F1SN52   |         | 2             | 2          | 1          | 2              | 1              | 1              | 1              | 0              | 5          | 44         | 1              | 3              | 1              | 4              | 1              | 0                 | 28.8%      | 7.9%       | 20.9%          | 29.5%          | 21.6%          | 7.9%           | 21.6%          | 0.0%  |
| tr F6Q4L6 F6Q4L6   |         | 10            | 8          | 7          | 0              | 2              | 2              | 0              | 0              | 18         | 31         | 37             | 0              | 3              | 5              | 0              | 0                 | 26.2%      | 24.8%      | 21.2%          | 0.0%           | 5.8%           | 5.8%           | 0.0%           | 0.0%  |
| tr F1RX16 F1RX16   |         | 24            | 7          | 9          | 2              | 5              | 2              | 1              | 3              | 60         | 26         | 42             | 3              | 9              | 2              | 7              | 13                | 35.9%      | 14.7%      | 15.6%          | 3.6%           | 9.1%           | 5.0%           | 3.3%           | 6.8%  |
| Q29073             |         | 7             | 3          | 1          | 1              | 1              | 0              | 3              | 1              | 17         | 20         | 10             | 5              | 1              | 0              | 5              | 4                 | 37.1%      | 7.0%       | 4.3%           | 3.6%           | 3.6%           | 0.0%           | 12.2%          | 4.3%  |
| tr F2Z543 F2Z543   |         | 10            | 6          | 6          | 0              | 2              | 3              | 0              | 0              | 24         | 44         | 45             | 0              | 3              | 8              | 0              | 0                 | 45.6%      | 19.0%      | 30.3%          | 0.0%           | 4.4%           | 11.7%          | 0.0%           | 0.0%  |
| tr F1SJQ6 F1SJQ6   |         | 7             | 6          | 4          | 1              | 4              | 1              | 1              | 2              | 33         | 29         | 27             | 2              | 7              | 1              | 4              | 12                | 33.8%      | 30.0%      | 19.2%          | 5.6%           | 22.1%          | 5.6%           | 5.6%           | 11.3% |
| tr F1RK9 F1RK9     |         | 6             | 2          | 0          | 2              | 2              | 0              | 0              | 0              | 26         | 5          | 0              | 2              | 3              | 0              | 0              | 3                 | 29.8%      | 14.0%      | 0.0%           | 6.4%           | 6.4%           | 0.0%           | 0.0%           | 11.9% |
| tr F1SHF4 F1SHF4   |         | 8             | 2          | 2          | 1              | 2              | 0              | 1              | 0              | 19         | 12         | 11             | 1              | 4              | 0              | 1              | 0                 | 19.6%      | 7.3%       | 5.8%           | 3.1%           | 3.1%           | 0.0%           | 3.1%           | 0.0%  |
| tr I3LR55 I3LR55   |         | 21            | 8          | 9          | 4              | 6              | 2              | 1              | 6              | 104        | 76         | 147            | 11             | 15             | 3              | 144            | 32                | 55.5%      | 40.2%      | 34.4%          | 18.2%          | 30.6%          | 12.9%          | 7.2%           | 36.4% |
| tr F1S9S5 F1S9S5   |         | 13            | 3          | 12         | 2              | 1              | 1              | 3              | 7              | 28         | 152        | 85             | 19             | 9              | 1              | 21             | 24                | 24.0%      | 3.3%       | 22.6%          | 1.4%           | 1.4%           | 1.4%           | 7.9%           | 16.1% |
| tr F2Z5F5 F2Z5F5   |         | 9             | 10         | 7          | 0              | 2              | 3              | 1              | 1              | 32         | 55         | 52             | 0              | 4              | 10             | 1              | 2                 | 43.3%      | 44.7%      | 33.7%          | 0.0%           | 12.0%          | 21.2%          | 7.2%           | 7.2%  |
| tr F1SJ85 F1SJ85   |         | 41            | 37         | 26         | 11             | 19             | 15             | 17             | 18             | 595        | 296        | 1389           | 57             | 56             | 30             | 417            | 432               | 67.1%      | 71.4%      | 51.7%          | 41.3%          | 54.6%          | 35.5%          | 42.2%          | 44.2% |
| tr F1S9S9 F1S9S9   |         | 14            | 3          | 10         | 2              | 1              | 1              | 3              | 5              | 29         | 152        | 77             | 19             | 9              | 1              | 21             | 21                | 26.0%      | 3.0%       | 16.7%          | 1.3%           | 1.3%           | 1.3%           | 7.2%           | 7.2%  |
| tr I3LI20 I3LI20   |         | 10            | 4          | 2          | 1              | 1              | 1              | 0              | 0              | 12         | 13         | 7              | 2              | 1              | 1              | 0              | 0                 | 18.0%      | 5.5%       | 6.2%           | 1.8%           | 1.8%           | 1.8%           | 0.0%           | 0.0%  |
| O02772             |         | 11            | 14         | 9          | 3              | 5              | 4              | 3              | 6              | 135        | 334        | 64             | 5              | 38             | 32             | 14             | 82                | 70.7%      | 76.7%      | 33.8%          | 24.8%          | 32.3%          | 26.3%          | 27.1%          | 37.6% |
| tr F2Z5Q6 F2Z5Q6   |         | 16            | 8          | 6          | 2              | 1              | 2              | 1              | 1              | 56         | 82         | 40             | 3              | 17             | 2              | 4              | 2                 | 43.3%      | 29.6%      | 22.7%          | 11.7%          | 6.9%           | 15.4%          | 8.1%           | 6.9%  |
| A1XQU3             |         | 8             | 6          | 4          | 1              | 4              | 1              | 1              | 2              | 34         | 29         | 27             | 2              | 7              | 1              | 4              | 12                | 37.1%      | 30.0%      | 19.2%          | 5.6%           | 22.1%          | 5.6%           | 5.6%           | 11.3% |
| P62279             |         | 12            | 6          | 4          | 0              | 3              | 2              | 0              | 0              | 34         | 99         | 16             | 0              | 11             | 10             | 0              | 0                 | 48.6%      | 46.7%      | 33.6%          | 0.0%           | 21.5%          | 12.1%          | 0.0%           | 0.0%  |
| tr F1STV2 F1STV2   |         | 2             | 2          | 2          | 2              | 1              | 0              | 0              | 0              | 8          | 11         | 17             | 2              | 1              | 0              | 0              | 0                 | 14.3%      | 14.3%      | 14.3%          | 14.3%          | 7.5%           | 0.0%           | 0.0%           | 0.0%  |
| tr I3L7W5 I3L7W5   |         | 2             | 2          | 2          | 2              | 1              | 0              | 0              | 0              | 8          | 11         | 17             | 2              | 1              | 0              | 0              | 0                 | 14.3%      | 14.3%      | 14.3%          | 14.3%          | 7.5%           | 0.0%           | 0.0%           | 0.0%  |
| Q4PLW0             |         | 7             | 4          | 7          | 0              | 0              | 1              | 0              | 0              | 10         | 9          | 28             | 0              | 0              | 3              | 0              | 0                 | 29.8%      | 16.6%      | 12.9%          | 0.0%           | 0.0%           | 8.3%           | 0.0%           | 0.0%  |
| tr I3L6W3 I3L6W3   |         | 20            | 12         | 5          | 1              | 2              | 3              | 1              | 0              | 37         | 33         | 15             | 2              | 6              | 3              | 1              | 0                 | 25.6%      | 13.8%      | 6.1%           | 1.6%           | 4.2%           | 2.9%           | 1.6%           | 0.0%  |
| tr F2Z4Y1 F2Z4Y1   |         | 18            | 6          | 7          | 1              | 4              | 2              | 2              | 3              | 61         | 16         | 106            | 3              | 7              | 2              | 14             | 9                 | 50.8%      | 22.8%      | 29.7%          | 4.1%           | 20.3%          | 5.7%           | 17.9%          | 17.5% |
| tr F6Q5P0 F6Q5P0   |         | 12            | 7          | 4          | 0              | 3              | 2              | 0              | 0              | 34         | 101        | 16             | 0              | 11             | 10             | 0              | 0                 | 34.0%      | 37.9%      | 23.5%          | 0.0%           | 15.0%          | 8.5%           | 0.0%           | 0.0%  |
| tr F1SUM3 F1SUM3   |         | 15            | 9          | 6          | 1              | 4              | 2              | 1              | 7              | 59         | 57         | 58             | 5              | 10             | 3              | 1              | 39                | 43.3%      | 58.1%      | 28.6%          | 5.2%           | 29.0%          | 9.5%           | 5.2%           | 22.9% |
| Q49I35             |         | 10            | 5          | 10         | 2              | 5              | 0              | 5              | 3              | 94         | 74         | 225            | 2              | 24             | 0              | 279            | 65                | 54.1%      | 48.1%      | 55.6%          | 25.2%          | 48.1%          | 0.0%           | 39.3%          | 20.0% |
| tr E1CAJ5 E1CAJ5   |         | 48            | 26         | 33         | 3              | 11             | 8              | 7              | 19             | 168        | 233        | 525            | 6              | 35             | 21             | 83             | 256               | 68.7%      | 50.3%      | 56.6%          | 7.3%           | 22.4%          | 15.2%          | 20.6%          | 35.6% |
| tr F1SSA6 F1SSA6   |         | 50            | 17         | 54         | 1              | 6              | 6              | 14             | 15             | 101        | 48         | 707            | 2              | 11             | 10             | 93             | 78                | 25.3%      | 8.5%       | 28.2%          | 0.8%           | 4.6%           | 3.4%           | 10.0%          | 11.2% |
| tr F1SJ88 F1SJ88   |         | 10            | 7          | 5          | 2              | 2              | 0              | 1              | 3              | 20         | 58         | 20             | 9              | 3              | 0              | 1              | 24                | 46.8%      | 40.8%      | 25.9%          | 10.0%          | 10.0%          | 0.0%           | 4.0%           | 14.4% |
| tr F1RTJ9 F1RTJ9   |         | 6             | 7          | 3          | 1              | 2              | 3              | 2              | 3              | 24         | 28         | 15             | 1              | 4              | 3              | 6              | 15                | 27.5%      | 33.1%      | 20.6%          | 9.4%           | 9.4%           | 11.2%          | 9.4%           | 16.2% |
| tr I3LUC8 I3LUC8   |         | 9             | 5          | 7          | 1              | 1              | 0              | 2              | 4              | 15         | 11         | 45             | 3              | 1              | 0              | 36             | 64                | 23.9%      | 27.4%      | 23.9%          | 4.0%           | 6.5%           | 0.0%           | 6.0%           | 12.9% |
| tr F1RJM2 F1RJM2   |         | 9             | 3          | 3          | 1              | 2              | 1              | 0              | 2              | 21         | 5          | 32             | 1              | 2              | 1              | 0              | 19                | 34.7%      | 15.3%      | 6.1%           | 3.8%           | 11.5%          | 5.7%           | 0.0%           | 21.4% |
| tr F1RH18 F1RH18   |         | 7             | 3          | 3          | 1              | 1              | 0              | 0              | 0              | 9          | 17         | 12             | 1              | 3              | 0              | 0              | 0                 | 35.5%      | 17.4%      | 11.6%          | 6.5%           | 6.5%           | 5.0%           | 0.0%           | 0.0%  |
| tr F2Z5E2 F2Z5E2   |         | 1             | 3          | 0          | 1              | 1              | 0              | 3              | 1              | 1          | 12         | 0              | 1              | 1              | 0              | 14             | 1                 | 2.4%       | 7.1%       | 0.0%           | 4.5%           | 4.5%           | 0.0%           | 9.3%           | 4.5%  |
| tr F1SUQ5 F1SUQ5   |         | 5             | 3          | 1          | 0              | 2              | 0              | 1              | 0              | 6          | 7          | 5              | 0              | 2              | 0              | 4              | 0                 | 5.9%       | 2.8%       | 1.9%           | 0.0%           | 1.8%           | 0.0%           | 1.2%           | 0.0%  |
| tr F1SU18 F1SU18   |         | 1             | 1          | 1          | 0              | 1              | 0              | 0              | 0              | 1          | 12         | 1              | 0              | 2              | 0              | 0              | 0                 | 3.8%       | 3.8%       | 9.8%           | 0.0%           | 3.8%           | 0.0%           | 0.0%           | 0.0%  |
| P12682             |         | 13            | 4          | 5          | 1              | 1              | 1              | 0              | 1              | 44         | 41         | 22             | 9              | 3              | 1              | 0              | 1                 | 48.4%      | 19.1%      | 19.5%          | 5.6%           | 5.6%           | 0.0%           | 0.0%           | 6.5%  |
| B6CVD7             |         | 11            | 5          | 3          | 0              | 1              | 2              | 0              | 2              | 25         | 47         | 7              | 0              | 3              | 8              | 0              | 3                 | 23.7%      | 7.9%       | 12.8%          | 0.0%           | 2.6%           | 5.6%           | 0.0%           | 10.3% |
| tr F1S538 F1S538   |         | 12            | 4          | 3          | 0              | 4              | 2              | 0              | 3              | 31         | 28         | 6              | 0              | 6              | 3              | 0              | 11                | 58.8%      | 16.1%      | 16.1%          | 0.0%           | 27.4%          | 5.8%           | 0.0%           | 11.3% |
| tr F1SGG1 F1SGG1   |         | 17            | 4          | 6          | 0              | 3              | 0              | 6              | 8              | 64         | 15         | 49             | 0              | 12             | 0              | 25             | 57                | 44.0%      | 17.5%      | 22.2%          | 0.0%           | 10.9%          | 0.0%           | 24.9%          | 23.8% |
| tr F1SV22 F1SV22   |         | 14            | 7          | 10         | 1              | 3              | 0              | 1              | 2              | 21         | 12         | 25             | 2              | 3              | 0              | 2              | 3                 | 4.0%       | 1.1%       | 2.4%           | 0.1%           | 0.9%           | 0.0%           | 0.3%           | 0.6%  |
| tr I3LQNA4 I3LQNA4 |         | 11            | 7          | 4          | 3              | 4              | 2              | 0              | 3              | 42         | 91         | 17             | 10             | 4              | 6              | 0              | 4                 | 41.8%      | 26.1%      | 13.7%          | 11.4%          | 14.7%          | 8.7%           | 0.0%           | 16.4% |
| tr F1RVD4 F1RVD4   |         | 9             | 7          | 2          | 1              | 3              | 3              | 1              | 2              | 24         | 56         | 3              | 1              | 5              | 6              | 5              | 9                 | 8.5%       | 6.4%       | 1.7%           | 1.2%           | 4.3%           | 2.6%           | 1.6%           | 2.6%  |
| tr F1RS69 F1RS69   |         | 9             | 1          | 4          | 1              | 1              | 1              | 1              | 0              | 31         | 9          | 26             | 3              | 1              | 2              | 1              | 0                 | 43.5%      | 6.5%       | 19.4%          | 6.5%           | 6.5%           | 6.5%           | 6.5%           | 0.0%  |
| tr I3LI56 I3LI56   |         | 2             | 2          | 1          | 1              | 1              | 1              | 0              | 0              | 2          | 18         | 2              | 1              | 1              | 1              | 0              | 0                 | 10.8%      | 10.8%      | 4.6%           | 4.2%           | 4.2%           | 6.7%           | 0.0%           | 0.0%  |
| tr I3LL80 I3LL80   |         | 21            | 18         | 7          | 8              | 12             | 4              | 2              | 3              | 238        | 463        | 64             | 35             | 61             | 9              | 15             | 28                | 56.9%      | 46.7%      | 24.6%          | 20.1%          | 27.5%          | 12.3%          | 10.5%          | 17.1% |
| tr F1SDR7 F1SDR7   |         | 22            | 8          | 9          | 1              | 5              | 2              | 8              | 8              | 95         | 32         | 129            | 3              | 14             | 2              | 102            | 66                | 62.6%      | 24.8%      | 31.7%          | 4.1%           | 22.8%          | 5.7%           | 35.8%          | 46.3% |
| tr F1SUM7 F1SUM7   |         | 7             | 7          | 4          | 1              | 3              | 0              | 1              | 3              | 16         | 31         | 33             | 2              | 5              | 0              | 3              | 14                | 39.5%      | 42.6%      | 25.1%          | 7.2%           | 20.0%          | 0.0%           | 7.2%           | 19.5% |
| tr F1S408 F1S408   |         | 6             | 5          | 0          | 0              | 4              | 0              | 0              | 2              | 14         | 13         | 0              | 0              | 4              | 0              | 0              | 4                 | 14.8%      | 10.6%      | 0.0%           | 0.0%           | 7.5%           | 0.0%           | 0.0%           | 5.6%  |
| tr A5GFX6 A5GFX6   |         | 5             | 6          | 3          | 1              | 2              | 3              | 2              | 5              | 32         | 131        | 115            | 2              | 12             | 10             | 6              | 37                | 4.7%       | 4.7%       | 6.2%           | 2.4%           | 2.4%           | 2.4%           | 4.5%           | 4.7%  |
| tr F1SFF4 F1SFF4   |         | 13            | 3          | 3          | 1              | 3              | 0              | 1              | 5              | 25         | 9          | 12             | 1              | 4              | 0              | 22             | 8                 | 43.0%      | 12.3%      | 12.3%          | 5.7%           | 12.7%          | 0.0%           | 6.6%           | 31.1% |
| tr F1RF77 F1RF77   |         | 12            | 6          | 3          | 1              | 1              | 2              | 0              | 1              | 13         | 21         | 8              | 1              | 1              | 3              | 0              | 5                 | 21.0%      | 8.5%       | 4.9%           | 2.1%           | 2.1%           | 1.3%           | 0.0%           | 2.9%  |
| Q9TSX9             |         | 17            | 10         | 15         | 3              | 6              | 3              | 4              | 9              | 44         | 664        | 141            | 50             | 44             | 10             | 22             | 73                | 65.2%      | 41.1%      | 51.8%          | 10.3%          | 25.0%          | 11.2%          | 33.0%          | 44.6% |
| tr K7GLE1 K7GLE1   |         | 34            | 33         | 23         | 9              | 16             | 1              |                |                |            |            |                |                |                |                |                |                   |            |            |                |                |                |                |                |       |

| Accession        | Sample# | Peptide Count |            |            |                |                |                |                | Spectral Count |            |            |                |                |                |                |                | Sequence Coverage |            |            |                |                |                |                |                |       |
|------------------|---------|---------------|------------|------------|----------------|----------------|----------------|----------------|----------------|------------|------------|----------------|----------------|----------------|----------------|----------------|-------------------|------------|------------|----------------|----------------|----------------|----------------|----------------|-------|
|                  |         | Whole Cell    | Whole Cell | Whole Cell | Cilia Fraction | Cilia Fraction | Cilia Fraction | Cilia Fraction | Whole Cell     | Whole Cell | Whole Cell | Cilia Fraction | Whole Cell        | Whole Cell | Whole Cell | Cilia Fraction |       |
|                  |         | 1             | 2          | 6          | 4              | 3              | 5              | 7              | 8              | 1          | 2          | 6              | 4              | 3              | 5              | 7              | 8                 | 1          | 2          | 6              | 4              | 3              | 5              | 7              | 8     |
| tr F1RGA7 F1RGA7 |         | 3             | 2          | 0          | 0              | 1              | 0              | 0              | 0              | 3          | 4          | 0              | 0              | 1              | 0              | 0              | 0                 | 4.5%       | 3.5%       | 0.0%           | 0.0%           | 2.6%           | 0.0%           | 0.0%           | 0.0%  |
| tr F1RGT0 F1RGT0 |         | 3             | 3          | 0          | 0              | 1              | 0              | 0              | 0              | 3          | 4          | 0              | 0              | 1              | 0              | 0              | 0                 | 4.1%       | 5.6%       | 0.0%           | 0.0%           | 1.9%           | 0.0%           | 0.0%           | 0.0%  |
| P56941           |         | 3             | 0          | 0          | 0              | 0              | 1              | 0              | 0              | 7          | 0          | 0              | 0              | 0              | 1              | 0              | 0                 | 4.6%       | 0.0%       | 0.0%           | 0.0%           | 0.0%           | 1.9%           | 0.0%           | 0.0%  |
| tr F1SUV1 F1SUV1 |         | 1             | 3          | 0          | 0              | 1              | 0              | 0              | 0              | 2          | 5          | 0              | 0              | 1              | 0              | 0              | 0                 | 5.8%       | 16.2%      | 0.0%           | 0.0%           | 5.5%           | 0.0%           | 0.0%           | 0.0%  |
| tr F1SC26 F1SC26 |         | 2             | 1          | 0          | 1              | 0              | 0              | 0              | 0              | 2          | 5          | 0              | 1              | 0              | 0              | 0              | 0                 | 7.5%       | 2.2%       | 0.0%           | 2.2%           | 0.0%           | 0.0%           | 0.0%           | 0.0%  |
| tr I3LG95 I3LG95 |         | 4             | 2          | 0          | 0              | 1              | 0              | 0              | 0              | 4          | 3          | 0              | 0              | 1              | 0              | 0              | 0                 | 4.6%       | 1.8%       | 0.0%           | 0.0%           | 0.7%           | 0.0%           | 0.0%           | 0.0%  |
| tr F1SBB5 F1SBB5 |         | 3             | 0          | 0          | 0              | 0              | 1              | 0              | 0              | 7          | 0          | 0              | 0              | 0              | 1              | 0              | 0                 | 4.6%       | 0.0%       | 0.0%           | 0.0%           | 0.0%           | 1.9%           | 0.0%           | 0.0%  |
| tr I3LRT6 I3LRT6 |         | 2             | 1          | 1          | 0              | 1              | 0              | 0              | 0              | 3          | 4          | 1              | 0              | 1              | 0              | 0              | 0                 | 10.2%      | 3.7%       | 2.0%           | 0.0%           | 3.7%           | 0.0%           | 0.0%           | 0.0%  |
| tr F1RFX3 F1RFX3 |         | 3             | 2          | 2          | 0              | 1              | 0              | 0              | 0              | 4          | 3          | 4              | 0              | 1              | 0              | 0              | 0                 | 15.2%      | 4.3%       | 6.1%           | 0.0%           | 8.5%           | 0.0%           | 0.0%           | 0.0%  |
| tr F1S129 F1S129 |         | 3             | 1          | 1          | 0              | 1              | 0              | 0              | 0              | 5          | 2          | 5              | 0              | 1              | 0              | 0              | 0                 | 4.1%       | 0.9%       | 1.8%           | 0.0%           | 1.6%           | 0.0%           | 0.0%           | 0.0%  |
| tr F1SUP1 F1SUP1 |         | 4             | 1          | 4          | 0              | 1              | 0              | 0              | 2              | 6          | 1          | 57             | 0              | 1              | 0              | 0              | 4                 | 12.7%      | 3.0%       | 17.6%          | 0.0%           | 4.1%           | 0.0%           | 0.0%           | 5.4%  |
| tr F1SIE0 F1SIE0 |         | 4             | 1          | 3          | 0              | 0              | 1              | 0              | 1              | 6          | 1          | 31             | 0              | 0              | 1              | 0              | 1                 | 23.4%      | 4.3%       | 9.6%           | 0.0%           | 0.0%           | 5.3%           | 0.0%           | 6.9%  |
| tr F1SB57 F1SB57 |         | 5             | 1          | 4          | 1              | 0              | 0              | 0              | 0              | 5          | 2          | 14             | 1              | 0              | 0              | 0              | 0                 | 36.5%      | 6.2%       | 12.4%          | 6.2%           | 0.0%           | 0.0%           | 0.0%           | 0.0%  |
| tr F1SB68 F1SB68 |         | 5             | 1          | 4          | 1              | 0              | 0              | 0              | 0              | 5          | 2          | 14             | 1              | 0              | 0              | 0              | 0                 | 32.9%      | 5.6%       | 11.2%          | 5.6%           | 0.0%           | 0.0%           | 0.0%           | 0.0%  |
| tr F2Z5B2 F2Z5B2 |         | 51            | 37         | 23         | 12             | 22             | 11             | 16             | 30             | 774        | 541        | 1616           | 46             | 101            | 40             | 514            | 725               | 78.4%      | 77.1%      | 64.0%          | 31.9%          | 48.5%          | 23.8%          | 46.5%          | 53.9% |
| tr F1SM26 F1SM26 |         | 10            | 6          | 8          | 1              | 2              | 2              | 2              | 4              | 67         | 130        | 275            | 16             | 9              | 3              | 14             | 17                | 54.9%      | 45.1%      | 65.7%          | 13.7%          | 25.5%          | 21.6%          | 25.5%          | 37.3% |
| tr I3LDR2 I3LDR2 |         | 22            | 19         | 5          | 5              | 7              | 6              | 5              | 18             | 466        | 1263       | 65             | 57             | 115            | 72             | 742            | 476               | 29.1%      | 29.3%      | 12.8%          | 12.0%          | 18.3%          | 11.8%          | 12.3%          | 29.1% |
| P00336           |         | 30            | 20         | 12         | 8              | 12             | 4              | 2              | 4              | 279        | 467        | 86             | 35             | 61             | 9              | 15             | 34                | 66.8%      | 57.2%      | 35.0%          | 20.1%          | 27.5%          | 12.3%          | 10.5%          | 22.2% |
| tr F1SV06 F1SV06 |         | 22            | 8          | 7          | 2              | 3              | 0              | 2              | 2              | 81         | 47         | 29             | 6              | 12             | 0              | 14             | 5                 | 30.1%      | 15.4%      | 14.7%          | 2.5%           | 4.0%           | 0.0%           | 6.3%           | 3.8%  |
| P10668           |         | 19            | 12         | 8          | 2              | 3              | 3              | 7              | 14             | 187        | 77         | 227            | 16             | 15             | 6              | 356            | 277               | 69.9%      | 63.3%      | 47.0%          | 15.1%          | 21.7%          | 20.5%          | 38.6%          | 57.8% |
| tr F1RP44 F1RP44 |         | 33            | 14         | 5          | 2              | 7              | 1              | 1              | 2              | 65         | 78         | 26             | 5              | 14             | 1              | 3              | 2                 | 38.5%      | 21.3%      | 6.8%           | 0.8%           | 11.6%          | 0.8%           | 1.3%           | 3.6%  |
| Q95ND5           |         | 9             | 5          | 1          | 1              | 1              | 0              | 3              | 3              | 17         | 26         | 3              | 3              | 3              | 0              | 19             | 3                 | 39.4%      | 27.8%      | 4.0%           | 5.1%           | 5.1%           | 0.0%           | 18.1%          | 16.2% |
| P27594           |         | 19            | 6          | 16         | 0              | 3              | 2              | 0              | 1              | 35         | 8          | 85             | 0              | 4              | 2              | 0              | 2                 | 40.6%      | 13.1%      | 24.1%          | 0.0%           | 7.2%           | 4.2%           | 0.0%           | 3.2%  |
| P00339           |         | 28            | 24         | 9          | 8              | 12             | 6              | 6              | 8              | 325        | 473        | 50             | 36             | 51             | 24             | 34             | 182               | 55.7%      | 59.9%      | 25.0%          | 26.8%          | 35.5%          | 14.5%          | 24.4%          | 29.8% |
| tr I3LBB2 I3LBB2 |         | 19            | 10         | 4          | 2              | 5              | 2              | 0              | 1              | 40         | 32         | 17             | 2              | 6              | 2              | 0              | 1                 | 29.1%      | 22.5%      | 6.4%           | 4.4%           | 14.3%          | 4.5%           | 0.0%           | 2.0%  |
| tr F1SR05 F1SR05 |         | 26            | 17         | 10         | 6              | 11             | 4              | 2              | 4              | 272        | 457        | 69             | 32             | 60             | 9              | 15             | 34                | 58.5%      | 50.4%      | 28.5%          | 16.6%          | 24.0%          | 12.2%          | 10.4%          | 22.0% |
| tr F1RXA7 F1RXA7 |         | 10            | 4          | 4          | 1              | 1              | 4              | 2              | 0              | 23         | 42         | 8              | 2              | 1              | 6              | 3              | 0                 | 25.2%      | 9.1%       | 10.1%          | 2.4%           | 2.4%           | 6.9%           | 4.7%           | 0.0%  |
| tr F1RPS8 F1RPS8 |         | 30            | 27         | 26         | 5              | 5              | 8              | 8              | 8              | 186        | 753        | 362            | 63             | 29             | 38             | 105            | 34                | 52.7%      | 51.4%      | 32.3%          | 14.6%          | 14.6%          | 16.7%          | 22.3%          | 27.8% |
| P80021           |         | 30            | 27         | 26         | 5              | 5              | 8              | 8              | 8              | 186        | 753        | 362            | 63             | 29             | 38             | 105            | 34                | 50.8%      | 49.5%      | 31.1%          | 14.1%          | 14.1%          | 16.1%          | 21.5%          | 26.8% |
| tr F1SLA7 F1SLA7 |         | 3             | 6          | 1          | 1              | 2              | 1              | 0              | 1              | 6          | 23         | 10             | 1              | 2              | 1              | 0              | 2                 | 17.8%      | 22.3%      | 6.9%           | 8.4%           | 9.9%           | 8.4%           | 0.0%           | 7.9%  |
| tr A6M930 A6M930 |         | 17            | 13         | 12         | 1              | 8              | 0              | 3              | 9              | 77         | 83         | 64             | 2              | 20             | 0              | 96             | 58                | 48.2%      | 32.4%      | 21.6%          | 4.7%           | 26.5%          | 0.0%           | 8.6%           | 29.2% |
| tr F1RMR6 F1RMR6 |         | 8             | 5          | 3          | 1              | 2              | 2              | 1              | 0              | 25         | 26         | 8              | 1              | 2              | 4              | 1              | 0                 | 31.7%      | 11.2%      | 13.2%          | 4.8%           | 7.6%           | 4.8%           | 3.4%           | 0.0%  |
| tr F1RQJ4 F1RQJ4 |         | 15            | 6          | 5          | 0              | 2              | 1              | 3              | 4              | 47         | 26         | 42             | 0              | 4              | 6              | 14             | 14                | 16.2%      | 4.7%       | 6.5%           | 0.0%           | 1.9%           | 0.9%           | 2.9%           | 5.2%  |
| tr F1SHQ8 F1SHQ8 |         | 27            | 22         | 7          | 8              | 10             | 7              | 8              | 21             | 575        | 1369       | 641            | 67             | 126            | 73             | 1007           | 503               | 40.8%      | 33.9%      | 19.2%          | 18.5%          | 24.1%          | 14.3%          | 18.7%          | 33.6% |
| tr D0G0B6 D0G0B6 |         | 8             | 5          | 7          | 0              | 0              | 1              | 0              | 0              | 12         | 10         | 28             | 0              | 0              | 3              | 0              | 0                 | 32.9%      | 19.6%      | 12.9%          | 0.0%           | 0.0%           | 8.3%           | 0.0%           | 0.0%  |
| A6M931           |         | 8             | 6          | 7          | 1              | 4              | 0              | 3              | 2              | 22         | 37         | 24             | 1              | 7              | 0              | 70             | 35                | 17.0%      | 15.3%      | 11.7%          | 4.6%           | 16.5%          | 0.0%           | 8.5%           | 3.9%  |
| tr F2Z594 F2Z594 |         | 16            | 5          | 12         | 1              | 1              | 1              | 0              | 3              | 50         | 46         | 59             | 9              | 3              | 1              | 0              | 11                | 57.7%      | 27.9%      | 28.8%          | 5.6%           | 5.6%           | 5.6%           | 0.0%           | 15.3% |
| tr K7GSU7 K7GSU7 |         | 15            | 5          | 3          | 2              | 2              | 2              | 4              | 7              | 64         | 25         | 33             | 5              | 2              | 5              | 64             | 41                | 62.7%      | 28.5%      | 25.4%          | 10.9%          | 10.9%          | 10.9%          | 27.5%          | 47.2% |
| Q2XQV4           |         | 13            | 6          | 11         | 1              | 2              | 1              | 1              | 1              | 38         | 14         | 54             | 1              | 3              | 3              | 1              | 1                 | 42.4%      | 22.6%      | 24.4%          | 2.7%           | 12.9%          | 6.1%           | 2.7%           | 1.7%  |
| tr I3LN32 I3LN32 |         | 7             | 6          | 7          | 1              | 1              | 1              | 0              | 0              | 12         | 33         | 46             | 2              | 3              | 1              | 0              | 0                 | 24.7%      | 15.9%      | 25.9%          | 3.2%           | 3.2%           | 3.6%           | 0.0%           | 0.0%  |
| tr K7GKN2 K7GKN2 |         | 20            | 6          | 17         | 0              | 3              | 2              | 0              | 1              | 37         | 8          | 99             | 0              | 4              | 2              | 0              | 2                 | 41.0%      | 12.7%      | 25.5%          | 0.0%           | 7.0%           | 4.1%           | 0.0%           | 3.1%  |
| tr F1RS15 F1RS15 |         | 9             | 1          | 7          | 1              | 2              | 1              | 1              | 8              | 17         | 13         | 24             | 1              | 2              | 1              | 2              | 31                | 16.2%      | 1.7%       | 18.7%          | 1.7%           | 5.1%           | 1.7%           | 1.7%           | 16.8% |
| tr F1RH29 F1RH29 |         | 2             | 2          | 0          | 1              | 1              | 1              | 0              | 1              | 2          | 28         | 0              | 2              | 1              | 1              | 0              | 1                 | 4.7%       | 1.6%       | 0.0%           | 1.5%           | 1.5%           | 1.5%           | 0.0%           | 2.6%  |
| tr F1RM47 F1RM47 |         | 3             | 3          | 0          | 0              | 1              | 0              | 0              | 0              | 11         | 19         | 0              | 0              | 4              | 0              | 0              | 0                 | 5.0%       | 5.4%       | 0.0%           | 0.0%           | 2.3%           | 0.0%           | 0.0%           | 0.0%  |
| tr F1SHR3 F1SHR3 |         | 5             | 2          | 6          | 0              | 1              | 1              | 2              | 5              | 8          | 7          | 52             | 0              | 1              | 1              | 5              | 55                | 26.1%      | 14.2%      | 24.3%          | 0.0%           | 4.4%           | 8.8%           | 15.9%          | 30.1% |
| Q52NJ3           |         | 4             | 3          | 0          | 0              | 1              | 0              | 2              | 0              | 8          | 7          | 0              | 0              | 2              | 0              | 5              | 0                 | 35.9%      | 11.6%      | 0.0%           | 0.0%           | 5.6%           | 0.0%           | 17.2%          | 0.0%  |
| tr A5D9J7 A5D9J7 |         | 8             | 3          | 3          | 0              | 1              | 1              | 1              | 2              | 11         | 4          | 7              | 0              | 1              | 1              | 1              | 2                 | 18.5%      | 4.8%       | 6.3%           | 0.0%           | 2.3%           | 2.3%           | 2.3%           | 3.2%  |
| tr F1RQ21 F1RQ21 |         | 8             | 3          | 3          | 0              | 1              | 1              | 1              | 2              | 11         | 4          | 7              | 0              | 1              | 1              | 1              | 2                 | 18.5%      | 4.8%       | 6.3%           | 0.0%           | 2.3%           | 2.3%           | 2.3%           | 3.2%  |
| tr I3LLU0 I3LLU0 |         | 4             | 4          | 1          | 0              | 1              | 1              | 1              | 0              | 5          | 10         | 12             | 0              | 1              | 1              | 1              | 0                 | 12.8%      | 17.1%      | 3.4%           | 0.0%           | 4.3%           | 3.1%           | 4.0%           | 0.0%  |
| tr B1NI70 B1NI70 |         | 9             | 4          | 2          | 1              | 1              | 1              | 0              | 0              | 18         | 35         | 15             | 3              | 2              | 2              | 0              | 0                 | 61.0%      | 18.8%      | 10.8%          | 5.4%           | 5.4%           | 5.4%           | 0.0%           | 0.0%  |
| tr I3LBK8 I3LBK8 |         | 9             | 4          | 2          | 1              | 1              | 1              | 0              | 0              | 18         | 35         | 15             | 3              | 2              | 2              | 0              | 0                 | 77.7%      | 24.0%      | 13.7%          | 6.9%           | 6.9%           | 6.9%           | 0.0%           | 0.0%  |
| tr I3L7U0 I3L7U0 |         | 28            | 8          | 22         | 2              | 3              | 0              | 6              | 12             | 62         | 14         | 183            | 3              | 7              | 0              | 43             | 51                | 43.2%      | 18.9%      | 35.4%          | 5.2%           | 10.5%          | 0.0%           | 17.4%          | 29.9% |
| tr I3LLT2 I3LLT2 |         | 9             | 5          | 0          | 0              | 2              | 1              | 0              | 2              | 16         | 22         | 0              | 0              | 4              | 1              | 0              | 4                 | 8.5%       | 4.0%       | 0.0%           | 0.0%           | 2.4%           | 0.6%           | 0.0%           | 2.4%  |
| tr F1SL54 F1SL54 |         | 15            | 6          | 16         | 1              | 2              | 2              | 5              | 5              | 22         | 16         | 77             | 1              | 2              | 2              | 13             | 8                 | 27.7%      | 7.4%       | 19.2%          | 1.4%           | 3.6%           | 2.2%           | 8.6%           | 9.7%  |
| P41367           |         | 13            | 5          | 3          | 1              | 2              | 2              | 2              | 0              | 51         | 71         | 16             | 5              | 5              | 6              | 2              | 0                 | 33.7%      | 13.1%      | 8.1%           | 2.1%           | 5.7%           | 5.7%           | 11.6%          | 0.0%  |
| tr K7GST6 K7GST6 |         | 5             | 6          | 2          | 1              | 3              | 0              | 0              | 1              | 15         | 54         | 10             | 3              | 6              | 0              | 0              | 3                 | 23.0%      | 29.1%      | 17.6%          | 7.4%           | 18.2%          | 0.0%           | 0.0%           | 5.4%  |
| tr K7GQ66 K7GQ66 |         | 5             | 6          | 2          | 1              | 3              | 0              | 0              | 1              | 15         | 54         | 10             | 3              | 6              | 0              | 0              | 3                 | 23.1%      | 29.3%      | 17.7%          | 7.5%           | 18.4%          | 0.0%           | 0.0%           | 5.4%  |
| tr K7GMK5 K7GMK5 |         | 10            | 4          | 5          | 1              | 1              | 0              | 0              | 0              | 16         | 7          | 33             | 1              | 2              | 0              | 0              | 0                 | 32.3%      | 15.5%      | 19.6%          | 2.7%           | 2.7%           | 0.0%           | 0.0%           | 0.0%  |
| tr F1RJX8 F1RJX8 |         | 44            | 16         | 7          | 2              | 6              | 1              | 3              | 13             | 108        | 46         | 41             | 6              | 12             | 2              | 9              | 33                | 40.2%      | 15.4%      | 7.5%           | 2.0%           | 6.8%           | 1.1%           | 4.0%           | 17.1% |
| P53027           |         | 6             | 4          | 3          | 1              | 2              | 0              | 0              | 2              | 14         | 140        | 44             | 3              | 17             | 0              | 0              | 11                | 23.6%      | 24.2%      | 20.6%          | 7.3%           | 7.9%           | 0.0%           | 0.0%           | 8.5%  |
| tr I3LJ44 I3LJ44 |         | 8             | 3          | 16         | 0              | 1              | 1              | 4              | 2              | 19         | 12         | 479            | 0              | 2              | 2              | 27             |                   |            |            |                |                |                |                |                |       |

| Sample#          | Peptide Count |            |            |                |                |                |                | Spectral Count |            |            |                |                |                |                | Sequence Coverage |            |            |                |                |                |                |       |       |       |
|------------------|---------------|------------|------------|----------------|----------------|----------------|----------------|----------------|------------|------------|----------------|----------------|----------------|----------------|-------------------|------------|------------|----------------|----------------|----------------|----------------|-------|-------|-------|
|                  | Whole Cell    | Whole Cell | Whole Cell | Cilia Fraction | Cilia Fraction | Cilia Fraction | Cilia Fraction | Whole Cell     | Whole Cell | Whole Cell | Cilia Fraction | Cilia Fraction | Cilia Fraction | Cilia Fraction | Whole Cell        | Whole Cell | Whole Cell | Cilia Fraction | Cilia Fraction | Cilia Fraction | Cilia Fraction |       |       |       |
|                  | 1             | 2          | 6          | 4              | 3              | 5              | 7              | 8              | 1          | 2          | 6              | 4              | 3              | 5              | 7                 | 8          | 1          | 2              | 6              | 4              | 3              | 5     | 7     | 8     |
| Accession        |               |            |            |                |                |                |                |                |            |            |                |                |                |                |                   |            |            |                |                |                |                |       |       |       |
| tr I3LV91 I3LV91 | 2             | 2          | 4          | 1              | 1              | 0              | 0              | 1              | 3          | 13         | 14             | 1              | 1              | 0              | 0                 | 1          | 9.4%       | 8.3%           | 12.0%          | 4.3%           | 4.3%           | 0.0%  | 0.0%  | 5.8%  |
| tr K7GPC9 K7GPC9 | 2             | 2          | 0          | 0              | 1              | 0              | 0              | 2              | 5          | 3          | 0              | 0              | 1              | 0              | 0                 | 12         | 13.1%      | 13.1%          | 0.0%           | 0.0%           | 10.0%          | 0.0%  | 0.0%  | 13.8% |
| tr K7GKQ1 K7GKQ1 | 2             | 2          | 0          | 0              | 1              | 0              | 0              | 2              | 5          | 3          | 0              | 0              | 1              | 0              | 0                 | 12         | 11.9%      | 11.9%          | 0.0%           | 0.0%           | 9.0%           | 0.0%  | 0.0%  | 12.4% |
| Q09138           | 4             | 2          | 0          | 0              | 1              | 0              | 1              | 0              | 4          | 4          | 0              | 0              | 1              | 0              | 2                 | 0          | 24.5%      | 3.6%           | 0.0%           | 0.0%           | 3.3%           | 0.0%  | 6.1%  | 0.0%  |
| tr F1RR91 F1RR91 | 1             | 1          | 0          | 0              | 1              | 0              | 0              | 1              | 5          | 3          | 0              | 0              | 1              | 0              | 0                 | 1          | 3.0%       | 3.0%           | 0.0%           | 0.0%           | 3.0%           | 0.0%  | 0.0%  | 3.0%  |
| tr F1SBC8 F1SBC8 | 3             | 0          | 0          | 0              | 1              | 0              | 0              | 1              | 8          | 0          | 0              | 0              | 1              | 0              | 0                 | 1          | 6.0%       | 0.0%           | 0.0%           | 0.0%           | 2.3%           | 0.0%  | 0.0%  | 1.0%  |
| tr E1U8C5 E1U8C5 | 3             | 1          | 0          | 0              | 1              | 0              | 0              | 0              | 3          | 5          | 0              | 0              | 1              | 0              | 0                 | 0          | 7.9%       | 1.9%           | 0.0%           | 0.0%           | 1.9%           | 0.0%  | 0.0%  | 0.0%  |
| tr F1S210 F1S210 | 1             | 2          | 0          | 0              | 1              | 0              | 0              | 0              | 1          | 7          | 0              | 0              | 1              | 0              | 0                 | 0          | 2.5%       | 4.4%           | 0.0%           | 0.0%           | 2.5%           | 0.0%  | 0.0%  | 0.0%  |
| Q9GKE7           | 2             | 2          | 0          | 0              | 0              | 1              | 0              | 0              | 3          | 5          | 0              | 0              | 0              | 1              | 0                 | 0          | 4.2%       | 3.4%           | 0.0%           | 0.0%           | 0.0%           | 3.4%  | 0.0%  | 0.0%  |
| tr I3L7N1 I3L7N1 | 0             | 1          | 0          | 1              | 0              | 0              | 0              | 0              | 0          | 8          | 0              | 1              | 0              | 0              | 0                 | 0          | 0.0%       | 3.2%           | 0.0%           | 3.2%           | 0.0%           | 0.0%  | 0.0%  | 0.0%  |
| P28839           | 1             | 2          | 1          | 0              | 1              | 0              | 0              | 0              | 1          | 7          | 1              | 0              | 1              | 0              | 0                 | 0          | 25.0%      | 25.0%          | 50.0%          | 0.0%           | 25.0%          | 0.0%  | 0.0%  | 0.0%  |
| tr F1RHL7 F1RHL7 | 2             | 3          | 1          | 0              | 1              | 0              | 0              | 0              | 2          | 6          | 2              | 0              | 1              | 0              | 0                 | 0          | 1.9%       | 1.8%           | 0.9%           | 0.0%           | 0.9%           | 0.0%  | 0.0%  | 0.0%  |
| tr F1SEY1 F1SEY1 | 4             | 1          | 1          | 0              | 1              | 0              | 0              | 0              | 4          | 4          | 3              | 0              | 1              | 0              | 0                 | 0          | 7.7%       | 1.1%           | 1.3%           | 0.0%           | 1.1%           | 0.0%  | 0.0%  | 0.0%  |
| tr F1SMJ9 F1SMJ9 | 4             | 1          | 3          | 1              | 0              | 0              | 1              | 1              | 7          | 1          | 51             | 1              | 0              | 0              | 1                 | 2          | 65.6%      | 10.0%          | 36.7%          | 10.0%          | 0.0%           | 0.0%  | 24.4% | 26.7% |
| tr K7GLP8 K7GLP8 | 4             | 0          | 1          | 0              | 1              | 0              | 0              | 0              | 8          | 0          | 7              | 0              | 1              | 0              | 0                 | 0          | 11.7%      | 0.0%           | 2.3%           | 0.0%           | 3.3%           | 0.0%  | 0.0%  | 0.0%  |
| tr F1SV03 F1SV03 | 2             | 1          | 1          | 0              | 1              | 0              | 0              | 0              | 5          | 3          | 8              | 0              | 1              | 0              | 0                 | 0          | 11.3%      | 3.0%           | 3.0%           | 0.0%           | 3.0%           | 0.0%  | 0.0%  | 0.0%  |
| tr F1RP34 F1RP34 | 5             | 1          | 2          | 0              | 0              | 1              | 1              | 1              | 7          | 1          | 105            | 0              | 0              | 1              | 4                 | 1          | 33.0%      | 4.2%           | 14.2%          | 0.0%           | 0.0%           | 9.0%  | 8.0%  | 8.0%  |
| tr I3LK68 I3LK68 | 4             | 3          | 4          | 0              | 1              | 0              | 0              | 0              | 5          | 3          | 28             | 0              | 1              | 0              | 0                 | 0          | 12.3%      | 9.0%           | 14.6%          | 0.0%           | 5.2%           | 0.0%  | 0.0%  | 0.0%  |
| tr F2Z5S8 F2Z5S8 | 39            | 27         | 14         | 9              | 11             | 7              | 12             | 30             | 797        | 1418       | 1236           | 69             | 130            | 73             | 1403              | 868        | 70.5%      | 50.0%          | 38.2%          | 20.5%          | 26.1%          | 14.3% | 31.9% | 59.2% |
| tr F1SPR4 F1SPR4 | 7             | 6          | 0          | 2              | 2              | 1              | 2              | 3              | 15         | 34         | 0              | 3              | 2              | 1              | 3                 | 5          | 32.2%      | 19.7%          | 0.0%           | 7.2%           | 6.9%           | 3.9%  | 10.3% | 15.6% |
| P0C5I2           | 7             | 6          | 0          | 2              | 2              | 1              | 2              | 3              | 15         | 34         | 0              | 3              | 2              | 1              | 3                 | 5          | 32.2%      | 19.7%          | 0.0%           | 7.2%           | 6.9%           | 3.9%  | 10.3% | 15.6% |
| Q2XVP4           | 46            | 33         | 16         | 10             | 16             | 7              | 12             | 33             | 878        | 1450       | 1503           | 70             | 141            | 73             | 1421              | 891        | 78.9%      | 71.8%          | 47.2%          | 22.6%          | 44.3%          | 14.2% | 31.7% | 67.8% |
| tr F1RWJ5 F1RWJ5 | 38            | 16         | 9          | 2              | 6              | 4              | 7              | 7              | 117        | 170        | 58             | 2              | 15             | 18             | 19                | 22         | 51.9%      | 25.5%          | 12.9%          | 5.9%           | 9.9%           | 4.0%  | 14.8% | 11.3% |
| tr I3L929 I3L929 | 11            | 5          | 5          | 1              | 1              | 0              | 2              | 3              | 30         | 11         | 33             | 4              | 1              | 0              | 52                | 14         | 30.7%      | 17.8%          | 14.4%          | 5.5%           | 3.1%           | 0.0%  | 7.7%  | 15.6% |
| tr F2Z5N5 F2Z5N5 | 4             | 5          | 3          | 0              | 2              | 2              | 0              | 2              | 10         | 31         | 14             | 0              | 3              | 2              | 0                 | 3          | 28.3%      | 26.9%          | 12.4%          | 0.0%           | 11.0%          | 15.9% | 0.0%  | 13.8% |
| tr F1RKJ5 F1RKJ5 | 29            | 12         | 3          | 1              | 5              | 1              | 2              | 1              | 63         | 102        | 14             | 4              | 15             | 1              | 5                 | 3          | 25.4%      | 12.9%          | 3.8%           | 1.2%           | 3.6%           | 1.2%  | 3.7%  | 1.6%  |
| tr F1SIJ5 F1SIJ5 | 29            | 16         | 15         | 2              | 5              | 4              | 2              | 3              | 87         | 95         | 91             | 5              | 10             | 7              | 7                 | 13         | 43.9%      | 35.0%          | 28.6%          | 6.8%           | 10.6%          | 8.2%  | 9.6%  | 12.0% |
| tr F1SMN5 F1SMN5 | 26            | 10         | 26         | 1              | 2              | 1              | 12             | 22             | 49         | 42         | 142            | 2              | 8              | 1              | 39                | 48         | 14.0%      | 3.3%           | 13.0%          | 0.4%           | 1.0%           | 0.4%  | 6.4%  | 13.8% |
| tr F1RIF8 F1RIF8 | 14            | 7          | 8          | 1              | 4              | 1              | 3              | 3              | 59         | 57         | 43             | 3              | 9              | 2              | 10                | 18         | 39.1%      | 23.3%          | 22.2%          | 2.5%           | 12.1%          | 4.8%  | 7.3%  | 7.5%  |
| tr F1SCH3 F1SCH3 | 16            | 8          | 5          | 2              | 3              | 2              | 2              | 3              | 34         | 49         | 25             | 3              | 5              | 2              | 22                | 10         | 32.2%      | 14.9%          | 10.3%          | 4.4%           | 6.9%           | 2.3%  | 5.1%  | 8.8%  |
| tr I3LDV0 I3LDV0 | 21            | 6          | 6          | 2              | 2              | 1              | 1              | 0              | 51         | 24         | 33             | 3              | 5              | 1              | 0                 | 13         | 30.1%      | 12.4%          | 9.6%           | 3.6%           | 3.6%           | 1.6%  | 0.0%  | 6.7%  |
| tr F1S393 F1S393 | 6             | 1          | 9          | 0              | 2              | 1              | 2              | 3              | 22         | 28         | 85             | 0              | 3              | 3              | 47                | 60         | 38.9%      | 6.2%           | 35.4%          | 0.0%           | 15.3%          | 6.2%  | 12.5% | 18.8% |
| tr I3LAC0 I3LAC0 | 11            | 5          | 5          | 1              | 1              | 0              | 1              | 0              | 17         | 8          | 33             | 1              | 2              | 0              | 3                 | 0          | 37.2%      | 21.4%          | 18.4%          | 2.6%           | 2.6%           | 0.0%  | 6.9%  | 0.0%  |
| tr F1S197 F1S197 | 2             | 4          | 3          | 1              | 1              | 1              | 0              | 0              | 2          | 23         | 15             | 1              | 1              | 1              | 0                 | 0          | 7.5%       | 12.4%          | 7.5%           | 2.5%           | 4.2%           | 2.5%  | 0.0%  | 0.0%  |
| tr I3LIM9 I3LIM9 | 2             | 4          | 3          | 1              | 1              | 1              | 0              | 0              | 2          | 23         | 15             | 1              | 1              | 1              | 0                 | 0          | 8.0%       | 13.2%          | 8.0%           | 2.7%           | 4.5%           | 2.7%  | 0.0%  | 0.0%  |
| tr I3L7Y1 I3L7Y1 | 4             | 6          | 3          | 0              | 2              | 2              | 0              | 2              | 10         | 32         | 14             | 0              | 3              | 2              | 0                 | 3          | 28.3%      | 33.1%          | 12.4%          | 0.0%           | 11.0%          | 15.9% | 0.0%  | 13.8% |
| tr F1RZK8 F1RZK8 | 9             | 7          | 3          | 0              | 2              | 2              | 0              | 1              | 17         | 25         | 13             | 0              | 2              | 3              | 0                 | 2          | 19.1%      | 14.2%          | 9.8%           | 0.0%           | 2.4%           | 2.4%  | 0.0%  | 2.4%  |
| tr F1SA98 F1SA98 | 17            | 8          | 12         | 1              | 2              | 1              | 5              | 4              | 86         | 41         | 129            | 3              | 6              | 6              | 72                | 47         | 41.8%      | 30.1%          | 35.2%          | 3.9%           | 13.3%          | 9.4%  | 19.5% | 24.2% |
| tr F1SFE3 F1SFE3 | 15            | 2          | 4          | 1              | 1              | 0              | 2              | 8              | 28         | 6          | 14             | 2              | 2              | 0              | 13                | 33         | 47.9%      | 6.1%           | 12.9%          | 3.8%           | 3.8%           | 0.0%  | 7.5%  | 31.1% |
| tr I3L7J2 I3L7J2 | 4             | 3          | 1          | 1              | 1              | 0              | 1              | 1              | 7          | 27         | 9              | 1              | 3              | 0              | 3                 | 7          | 51.4%      | 25.2%          | 24.3%          | 10.3%          | 10.3%          | 0.0%  | 10.3% | 24.3% |
| tr F1SS01 F1SS01 | 3             | 4          | 4          | 0              | 2              | 0              | 2              | 5              | 5          | 12         | 29             | 0              | 2              | 0              | 3                 | 10         | 24.6%      | 18.0%          | 20.4%          | 0.0%           | 9.5%           | 0.0%  | 14.7% | 36.5% |
| tr F1SOC0 F1SOC0 | 4             | 1          | 0          | 0              | 0              | 2              | 0              | 0              | 12         | 5          | 0              | 0              | 0              | 2              | 0                 | 0          | 15.8%      | 5.7%           | 0.0%           | 0.0%           | 0.0%           | 5.7%  | 0.0%  | 0.0%  |
| tr F1SRK6 F1SRK6 | 53            | 18         | 32         | 5              | 10             | 6              | 5              | 14             | 212        | 46         | 248            | 9              | 15             | 6              | 46                | 97         | 43.9%      | 25.4%          | 37.2%          | 7.7%           | 16.9%          | 8.8%  | 10.2% | 17.4% |
| tr F1S2G1 F1S2G1 | 11            | 5          | 0          | 0              | 2              | 1              | 2              | 4              | 20         | 23         | 0              | 0              | 4              | 1              | 3                 | 5          | 10.3%      | 5.1%           | 0.0%           | 0.0%           | 2.1%           | 2.0%  | 2.7%  | 4.3%  |
| Q9GL01           | 18            | 5          | 7          | 1              | 5              | 1              | 2              | 5              | 63         | 6          | 33             | 1              | 6              | 1              | 14                | 29         | 34.2%      | 15.7%          | 14.6%          | 3.5%           | 16.2%          | 4.9%  | 4.8%  | 16.5% |
| tr F1SLU6 F1SLU6 | 16            | 8          | 7          | 0              | 2              | 2              | 3              | 4              | 37         | 32         | 87             | 0              | 6              | 2              | 32                | 10         | 29.0%      | 8.3%           | 12.6%          | 0.0%           | 2.8%           | 2.8%  | 4.2%  | 8.8%  |
| Q06AU7           | 5             | 4          | 4          | 0              | 1              | 2              | 2              | 3              | 13         | 13         | 23             | 0              | 1              | 2              | 35                | 43         | 30.3%      | 23.9%          | 20.4%          | 0.0%           | 8.5%           | 15.9% | 17.9% | 16.9% |
| Q9GJT2           | 10            | 2          | 4          | 0              | 2              | 0              | 5              | 4              | 19         | 7          | 31             | 0              | 3              | 0              | 36                | 45         | 56.7%      | 20.6%          | 14.9%          | 0.0%           | 14.5%          | 0.0%  | 28.4% | 20.9% |
| Q29048           | 11            | 4          | 13         | 0              | 0              | 2              | 5              | 13             | 21         | 5          | 95             | 0              | 0              | 3              | 28                | 53         | 17.5%      | 8.3%           | 21.4%          | 0.0%           | 0.0%           | 4.1%  | 13.5% | 27.1% |
| tr F1SSJ8 F1SSJ8 | 13            | 5          | 4          | 2              | 1              | 1              | 1              | 4              | 39         | 22         | 9              | 3              | 3              | 1              | 1                 | 9          | 24.2%      | 7.5%           | 7.9%           | 1.5%           | 1.5%           | 1.5%  | 3.1%  | 11.1% |
| tr F1SI10 F1SI10 | 6             | 6          | 5          | 0              | 4              | 2              | 1              | 3              | 23         | 47         | 232            | 0              | 6              | 2              | 11                | 22         | 22.9%      | 26.6%          | 17.3%          | 0.0%           | 26.6%          | 12.1% | 12.6% | 13.6% |
| tr F1SNL8 F1SNL8 | 8             | 2          | 2          | 0              | 2              | 1              | 0              | 1              | 17         | 53         | 9              | 0              | 4              | 4              | 0                 | 1          | 22.3%      | 4.9%           | 4.0%           | 0.0%           | 8.7%           | 2.8%  | 0.0%  | 3.6%  |
| tr F1SN37 F1SN37 | 27            | 10         | 16         | 0              | 4              | 3              | 4              | 10             | 70         | 45         | 312            | 0              | 10             | 3              | 52                | 36         | 45.6%      | 14.5%          | 24.4%          | 0.0%           | 6.3%           | 5.4%  | 9.4%  | 18.5% |
| tr I3LCL6 I3LCL6 | 14            | 5          | 4          | 2              | 1              | 1              | 1              | 4              | 40         | 22         | 9              | 3              | 3              | 1              | 1                 | 9          | 24.2%      | 7.5%           | 7.9%           | 1.5%           | 1.5%           | 1.5%  | 3.1%  | 11.1% |
| tr K7GND3 K7GND3 | 9             | 6          | 2          | 0              | 2              | 1              | 1              | 0              | 29         | 33         | 88             | 0              | 2              | 5              | 3                 | 0          | 34.1%      | 17.6%          | 7.4%           | 0.0%           | 9.0%           | 5.0%  | 5.0%  | 0.0%  |
| tr F1S666 F1S666 | 15            | 7          | 6          | 0              | 3              | 1              | 1              | 1              | 36         | 35         | 100            | 0              | 3              | 5              | 3                 | 3          | 39.0%      | 16.3%          | 15.4%          | 0.0%           | 9.5%           | 3.9%  | 3.9%  | 2.7%  |
| Q764M5           | 28            | 10         | 16         | 0              | 4              | 3              | 5              | 11             | 71         | 45         | 312            | 0              | 10             | 3              | 55                | 41         | 49.8%      | 14.5%          | 24.4%          | 0.0%           | 6.3%           | 5.4%  | 13.6% | 22.7% |
| tr B5KJG2 B5KJG2 | 3             | 5          | 2          | 0              | 2              | 3              | 1              | 4              | 17         | 73         | 13             | 0              | 6              | 4              | 20                | 84         | 8.3%       | 13.0%          | 8.3%           | 0.0%           | 4.7%           | 4.7%  | 4.0%  | 10.7% |
| tr F2Z567 F2Z567 | 16            | 10         | 4          | 1              | 5              | 0              | 1              | 4              | 44         | 64         | 29             | 3              | 9              | 0              | 4                 | 31         | 44.7%      | 31.1%          | 19.5%          | 4.3%           | 18.7%          | 0.0%  | 3.1%  | 24.5% |
| tr F8S326 F8S326 | 10            | 1          | 0          | 0              | 1              | 2              | 2              | 5              | 26         | 1          | 0              | 0              | 1              | 2              | 7                 | 23         | 32.6%      | 3.1%           | 0.0%           | 0.0%           | 6.1%           | 3.2%  | 7.6%  | 11.8% |
| tr I3LFM9 I3LFM9 | 10            | 1          | 0          | 0              | 1              | 2              | 2              | 5              | 26         | 1          | 0              | 0              | 1              | 2              | 7                 | 23         | 32.6%      | 3.1%           | 0.0%           | 0.0%           | 6.1%           | 3.2%  | 7.6%  | 11.8% |
| tr I3LB18 I3LB18 | 10            | 1          | 0          | 0              | 1              | 2              | 2              | 5              | 26         | 1          |                |                |                |                |                   |            |            |                |                |                |                |       |       |       |

| Accession        | Sample# | Peptide Count |            |            |                |                |                |                | Spectral Count |            |            |                |                |                |                |                | Sequence Coverage |            |            |                |                |                |                |                |       |
|------------------|---------|---------------|------------|------------|----------------|----------------|----------------|----------------|----------------|------------|------------|----------------|----------------|----------------|----------------|----------------|-------------------|------------|------------|----------------|----------------|----------------|----------------|----------------|-------|
|                  |         | Whole Cell    | Whole Cell | Whole Cell | Cilia Fraction | Cilia Fraction | Cilia Fraction | Cilia Fraction | Whole Cell     | Whole Cell | Whole Cell | Cilia Fraction | Whole Cell        | Whole Cell | Whole Cell | Cilia Fraction |       |
|                  |         | 1             | 2          | 6          | 4              | 3              | 5              | 7              | 8              | 1          | 2          | 6              | 4              | 3              | 5              | 7              | 8                 | 1          | 2          | 6              | 4              | 3              | 5              | 7              | 8     |
| tr F1S4D8 F1S4D8 |         | 5             | 0          | 1          | 0              | 1              | 0              | 0              | 0              | 9          | 0          | 7              | 0              | 1              | 0              | 0              | 0                 | 12.4%      | 0.0%       | 2.0%           | 0.0%           | 2.9%           | 0.0%           | 0.0%           | 0.0%  |
| tr F1SV18 F1SV18 |         | 3             | 1          | 2          | 1              | 0              | 0              | 0              | 0              | 5          | 4          | 18             | 1              | 0              | 0              | 0              | 0                 | 11.1%      | 1.8%       | 7.4%           | 3.9%           | 0.0%           | 0.0%           | 0.0%           | 0.0%  |
| tr F1S086 F1S086 |         | 3             | 2          | 4          | 0              | 0              | 1              | 0              | 0              | 4          | 5          | 33             | 0              | 0              | 1              | 0              | 0                 | 11.4%      | 5.1%       | 11.1%          | 0.0%           | 0.0%           | 2.9%           | 0.0%           | 0.0%  |
| tr I3LJ87 I3LJ87 |         | 10            | 10         | 3          | 2              | 2              | 2              | 0              | 2              | 36         | 55         | 52             | 2              | 5              | 3              | 0              | 7                 | 42.4%      | 47.8%      | 12.5%          | 15.2%          | 15.2%          | 14.7%          | 0.0%           | 17.9% |
| tr F1S0A2 F1S0A2 |         | 11            | 7          | 4          | 1              | 1              | 1              | 1              | 3              | 25         | 21         | 21             | 3              | 1              | 1              | 1              | 31                | 34.7%      | 36.4%      | 22.7%          | 4.5%           | 7.4%           | 9.1%           | 8.0%           | 15.9% |
| tr I3LS54 I3LS54 |         | 11            | 6          | 16         | 1              | 1              | 2              | 1              | 3              | 43         | 31         | 92             | 1              | 3              | 4              | 11             | 13                | 25.8%      | 15.1%      | 19.4%          | 2.2%           | 2.2%           | 3.5%           | 2.2%           | 9.4%  |
| tr F1RG16 F1RG16 |         | 12            | 7          | 5          | 0              | 5              | 1              | 7              | 12             | 37         | 28         | 44             | 0              | 6              | 1              | 141            | 104               | 38.4%      | 22.9%      | 18.1%          | 0.0%           | 15.2%          | 4.1%           | 26.3%          | 42.3% |
| tr F2Z554 F2Z554 |         | 8             | 9          | 1          | 1              | 2              | 2              | 0              | 2              | 28         | 37         | 24             | 1              | 3              | 3              | 0              | 23                | 51.3%      | 60.9%      | 10.4%          | 10.4%          | 24.3%          | 11.3%          | 0.0%           | 27.8% |
| tr F1S0M2 F1S0M2 |         | 6             | 5          | 6          | 1              | 2              | 0              | 2              | 3              | 11         | 17         | 89             | 1              | 2              | 0              | 19             | 29                | 56.2%      | 47.4%      | 56.2%          | 19.7%          | 15.3%          | 0.0%           | 28.5%          | 48.2% |
| P82460           |         | 9             | 7          | 5          | 2              | 3              | 2              | 2              | 1              | 151        | 1336       | 23             | 65             | 51             | 43             | 172            | 101               | 78.1%      | 57.1%      | 40.0%          | 26.7%          | 35.2%          | 25.7%          | 24.8%          | 14.3% |
| tr F1SEM2 F1SEM2 |         | 10            | 2          | 3          | 1              | 3              | 0              | 1              | 5              | 45         | 2          | 20             | 1              | 4              | 0              | 12             | 29                | 50.2%      | 22.2%      | 15.4%          | 10.0%          | 34.4%          | 0.0%           | 5.4%           | 44.8% |
| tr I3LG30 I3LG30 |         | 8             | 3          | 2          | 1              | 2              | 0              | 0              | 0              | 21         | 26         | 37             | 1              | 4              | 0              | 0              | 0                 | 84.8%      | 33.3%      | 19.0%          | 11.4%          | 21.9%          | 0.0%           | 0.0%           | 0.0%  |
| tr I3LKF3 I3LKF3 |         | 27            | 18         | 19         | 2              | 6              | 3              | 11             | 15             | 133        | 253        | 213            | 16             | 22             | 3              | 282            | 223               | 51.0%      | 44.4%      | 31.0%          | 7.3%           | 20.2%          | 9.2%           | 35.2%          | 42.7% |
| tr F1RFN9 F1RFN9 |         | 27            | 18         | 19         | 2              | 6              | 3              | 11             | 15             | 133        | 253        | 213            | 16             | 22             | 3              | 282            | 223               | 49.7%      | 43.2%      | 30.2%          | 7.1%           | 19.7%          | 8.9%           | 34.3%          | 41.6% |
| O19069           |         | 9             | 7          | 2          | 1              | 2              | 1              | 1              | 2              | 29         | 37         | 4              | 2              | 2              | 3              | 2              | 6                 | 24.0%      | 26.6%      | 6.9%           | 8.1%           | 8.1%           | 8.1%           | 4.6%           | 8.1%  |
| tr I3LB44 I3LB44 |         | 21            | 13         | 9          | 2              | 3              | 1              | 1              | 2              | 94         | 104        | 221            | 8              | 11             | 2              | 20             | 3                 | 63.8%      | 56.7%      | 32.8%          | 8.4%           | 14.2%          | 5.9%           | 5.9%           | 6.8%  |
| tr F1S3H7 F1S3H7 |         | 10            | 5          | 5          | 1              | 3              | 1              | 3              | 3              | 28         | 29         | 20             | 1              | 4              | 1              | 15             | 28                | 34.9%      | 21.6%      | 21.9%          | 4.0%           | 15.9%          | 7.7%           | 15.6%          | 15.6% |
| tr F1SQX2 F1SQX2 |         | 14            | 1          | 3          | 0              | 3              | 0              | 1              | 5              | 36         | 2          | 10             | 0              | 4              | 0              | 35             | 40                | 24.4%      | 1.3%       | 6.4%           | 0.0%           | 2.5%           | 0.0%           | 1.9%           | 12.3% |
| tr F1SGC5 F1SGC5 |         | 2             | 3          | 0          | 0              | 1              | 0              | 0              | 1              | 4          | 15         | 0              | 0              | 1              | 1              | 0              | 1                 | 2.5%       | 2.5%       | 0.0%           | 0.0%           | 2.5%           | 2.5%           | 0.0%           | 2.5%  |
| tr K7GPM3 K7GPM3 |         | 1             | 3          | 0          | 0              | 1              | 1              | 0              | 0              | 5          | 14         | 0              | 0              | 2              | 0              | 0              | 0                 | 5.9%       | 13.2%      | 0.0%           | 0.0%           | 5.9%           | 0.0%           | 0.0%           | 0.0%  |
| tr I3LIU5 I3LIU5 |         | 5             | 2          | 3          | 0              | 0              | 2              | 0              | 0              | 14         | 5          | 13             | 0              | 0              | 2              | 0              | 0                 | 35.2%      | 18.4%      | 22.4%          | 0.0%           | 0.0%           | 10.4%          | 0.0%           | 0.0%  |
| tr F1SR72 F1SR72 |         | 8             | 4          | 2          | 1              | 0              | 0              | 0              | 0              | 12         | 7          | 15             | 2              | 0              | 0              | 0              | 0                 | 15.4%      | 8.2%       | 4.6%           | 1.4%           | 0.0%           | 0.0%           | 0.0%           | 0.0%  |
| tr F1SP56 F1SP56 |         | 5             | 3          | 2          | 0              | 0              | 1              | 0              | 0              | 11         | 8          | 16             | 0              | 0              | 2              | 0              | 0                 | 32.4%      | 16.2%      | 13.4%          | 0.0%           | 0.0%           | 5.7%           | 0.0%           | 0.0%  |
| P11607           |         | 13            | 9          | 9          | 1              | 2              | 1              | 4              | 3              | 22         | 26         | 40             | 1              | 2              | 2              | 7              | 4                 | 17.8%      | 8.6%       | 12.7%          | 1.5%           | 2.8%           | 1.3%           | 8.4%           | 5.7%  |
| Q29195           |         | 10            | 7          | 7          | 0              | 4              | 2              | 1              | 4              | 29         | 48         | 234            | 0              | 6              | 2              | 11             | 24                | 33.6%      | 32.7%      | 26.6%          | 0.0%           | 26.6%          | 12.1%          | 12.6%          | 18.2% |
| tr A8U4R4 A8U4R4 |         | 31            | 19         | 21         | 4              | 3              | 1              | 12             | 22             | 175        | 114        | 329            | 7              | 17             | 6              | 268            | 208               | 54.3%      | 40.9%      | 28.9%          | 8.3%           | 7.9%           | 2.2%           | 26.5%          | 38.2% |
| tr I3LO7 I3LO7   |         | 6             | 3          | 3          | 0              | 1              | 1              | 1              | 3              | 13         | 16         | 29             | 0              | 2              | 1              | 1              | 10                | 20.2%      | 5.1%       | 9.2%           | 0.0%           | 2.5%           | 2.5%           | 3.7%           | 8.7%  |
| tr I3LS12 I3LS12 |         | 13            | 1          | 7          | 0              | 1              | 0              | 0              | 2              | 28         | 1          | 34             | 0              | 3              | 0              | 0              | 4                 | 31.1%      | 2.7%       | 17.3%          | 0.0%           | 4.8%           | 0.0%           | 0.0%           | 7.5%  |
| tr I3LBV1 I3LBV1 |         | 28            | 20         | 8          | 5              | 10             | 4              | 6              | 8              | 283        | 206        | 228            | 8              | 31             | 11             | 75             | 107               | 63.9%      | 44.3%      | 22.2%          | 14.8%          | 32.6%          | 6.8%           | 24.1%          | 20.4% |
| tr F1SON2 F1SON2 |         | 12            | 6          | 4          | 1              | 2              | 0              | 1              | 0              | 23         | 75         | 12             | 2              | 8              | 0              | 8              | 0                 | 29.4%      | 13.2%      | 9.5%           | 2.7%           | 4.8%           | 0.0%           | 2.7%           | 0.0%  |
| Q04967           |         | 12            | 5          | 10         | 1              | 2              | 0              | 3              | 3              | 28         | 21         | 70             | 3              | 2              | 0              | 21             | 5                 | 15.4%      | 9.6%       | 15.4%          | 2.0%           | 5.8%           | 0.0%           | 5.6%           | 5.6%  |
| tr F2Z557 F2Z557 |         | 24            | 16         | 9          | 2              | 5              | 1              | 3              | 8              | 99         | 107        | 52             | 6              | 14             | 1              | 15             | 33                | 35.5%      | 28.1%      | 18.4%          | 2.5%           | 4.7%           | 2.2%           | 8.0%           | 15.7% |
| tr I3LS00 I3LS00 |         | 24            | 16         | 9          | 2              | 5              | 1              | 3              | 8              | 99         | 107        | 52             | 6              | 14             | 1              | 15             | 33                | 34.9%      | 27.7%      | 18.1%          | 2.5%           | 4.6%           | 2.2%           | 7.9%           | 15.5% |
| tr F1S2G5 F1S2G5 |         | 10            | 8          | 1          | 0              | 2              | 1              | 3              | 1              | 21         | 38         | 4              | 0              | 3              | 3              | 13             | 2                 | 38.1%      | 12.7%      | 3.3%           | 0.0%           | 7.6%           | 4.4%           | 16.3%          | 3.3%  |
| tr F1RS36 F1RS36 |         | 54            | 34         | 42         | 8              | 15             | 9              | 10             | 20             | 328        | 322        | 534            | 20             | 29             | 17             | 139            | 199               | 59.3%      | 46.1%      | 43.2%          | 17.2%          | 27.8%          | 13.7%          | 19.6%          | 34.4% |
| tr F1S8Y5 F1S8Y5 |         | 27            | 19         | 18         | 0              | 7              | 6              | 6              | 17             | 198        | 277        | 184            | 0              | 15             | 33             | 152            | 207               | 78.3%      | 57.8%      | 41.9%          | 0.0%           | 31.4%          | 19.0%          | 37.2%          | 62.0% |
| Q29387           |         | 19            | 12         | 8          | 1              | 3              | 3              | 3              | 4              | 64         | 36         | 106            | 1              | 6              | 3              | 71             | 22                | 54.6%      | 36.1%      | 19.9%          | 3.0%           | 10.6%          | 6.5%           | 13.7%          | 17.1% |
| tr F1RPW9 F1RPW9 |         | 19            | 12         | 8          | 1              | 3              | 3              | 3              | 4              | 64         | 36         | 106            | 1              | 6              | 3              | 71             | 22                | 53.8%      | 35.5%      | 19.6%          | 3.0%           | 10.5%          | 6.4%           | 13.4%          | 16.9% |
| tr F2Z5K2 F2Z5K2 |         | 12            | 6          | 3          | 1              | 1              | 0              | 2              | 11             | 41         | 49         | 26             | 4              | 5              | 0              | 19             | 27                | 52.3%      | 32.4%      | 13.3%          | 5.0%           | 5.0%           | 0.0%           | 12.9%          | 40.2% |
| tr F2Z5F7 F2Z5F7 |         | 5             | 2          | 0          | 0              | 2              | 2              | 2              | 1              | 41         | 29         | 0              | 0              | 2              | 5              | 13             | 9                 | 47.5%      | 20.2%      | 0.0%           | 0.0%           | 20.2%          | 20.2%          | 20.2%          | 20.2% |
| tr F1RUH2 F1RUH2 |         | 7             | 3          | 2          | 1              | 1              | 2              | 0              | 0              | 30         | 30         | 3              | 1              | 1              | 4              | 0              | 0                 | 31.1%      | 6.3%       | 11.7%          | 5.3%           | 6.1%           | 6.3%           | 0.0%           | 0.0%  |
| tr F1S4M2 F1S4M2 |         | 4             | 3          | 3          | 0              | 2              | 0              | 1              | 2              | 9          | 21         | 28             | 0              | 3              | 0              | 1              | 13                | 23.0%      | 15.1%      | 18.4%          | 0.0%           | 13.2%          | 0.0%           | 5.3%           | 9.9%  |
| tr F1RM03 F1RM03 |         | 8             | 2          | 5          | 1              | 1              | 0              | 2              | 1              | 15         | 15         | 42             | 1              | 2              | 0              | 5              | 4                 | 34.1%      | 11.3%      | 24.9%          | 3.8%           | 3.8%           | 0.0%           | 13.0%          | 6.4%  |
| tr I3LL97 I3LL97 |         | 8             | 4          | 7          | 0              | 1              | 0              | 4              | 3              | 14         | 6          | 49             | 0              | 2              | 0              | 35             | 14                | 50.3%      | 28.0%      | 34.2%          | 0.0%           | 7.8%           | 0.0%           | 36.8%          | 25.4% |
| tr F1RY04 F1RY04 |         | 9             | 2          | 3          | 0              | 1              | 0              | 0              | 0              | 18         | 2          | 4              | 0              | 2              | 0              | 0              | 0                 | 17.2%      | 3.7%       | 4.9%           | 0.0%           | 2.5%           | 0.0%           | 0.0%           | 0.0%  |
| tr F1SQM6 F1SQM6 |         | 7             | 1          | 3          | 0              | 2              | 0              | 1              | 0              | 18         | 2          | 35             | 0              | 2              | 0              | 1              | 0                 | 61.9%      | 12.4%      | 41.9%          | 0.0%           | 32.4%          | 0.0%           | 11.4%          | 0.0%  |
| tr K7GLZ1 K7GLZ1 |         | 3             | 0          | 3          | 0              | 0              | 1              | 4              | 11             | 10         | 0          | 15             | 0              | 0              | 1              | 32             | 102               | 14.1%      | 0.0%       | 18.9%          | 0.0%           | 0.0%           | 8.6%           | 27.6%          | 44.3% |
| tr F1SL63 F1SL63 |         | 2             | 2          | 2          | 0              | 1              | 0              | 0              | 6              | 3          | 7          | 7              | 0              | 1              | 0              | 0              | 0                 | 2.0%       | 0.8%       | 2.3%           | 0.0%           | 0.8%           | 0.0%           | 0.0%           | 6.5%  |
| tr K7GS03 K7GS03 |         | 2             | 2          | 3          | 0              | 1              | 0              | 0              | 5              | 3          | 7          | 8              | 0              | 1              | 0              | 0              | 11                | 2.2%       | 0.9%       | 3.9%           | 0.0%           | 0.9%           | 0.0%           | 0.0%           | 6.6%  |
| tr F1SME6 F1SME6 |         | 7             | 0          | 3          | 0              | 1              | 0              | 3              | 0              | 10         | 0          | 10             | 0              | 1              | 0              | 10             | 0                 | 26.2%      | 0.0%       | 10.1%          | 0.0%           | 6.7%           | 0.0%           | 15.7%          | 0.0%  |
| tr I3LG92 I3LG92 |         | 2             | 2          | 3          | 0              | 1              | 0              | 0              | 3              | 3          | 7          | 8              | 0              | 1              | 0              | 0              | 8                 | 4.4%       | 1.7%       | 7.8%           | 0.0%           | 1.7%           | 0.0%           | 0.0%           | 4.8%  |
| tr I3LTF9 I3LTF9 |         | 2             | 3          | 0          | 1              | 0              | 0              | 0              | 1              | 2          | 8          | 0              | 1              | 0              | 0              | 0              | 3                 | 8.9%       | 7.2%       | 0.0%           | 2.8%           | 0.0%           | 0.0%           | 0.0%           | 4.7%  |
| tr F1SKH6 F1SKH6 |         | 2             | 3          | 0          | 1              | 0              | 0              | 0              | 1              | 2          | 8          | 0              | 1              | 0              | 0              | 0              | 3                 | 12.7%      | 10.4%      | 0.0%           | 4.0%           | 0.0%           | 0.0%           | 0.0%           | 6.8%  |
| tr I3LBK6 I3LBK6 |         | 5             | 0          | 2          | 0              | 1              | 0              | 1              | 2              | 10         | 0          | 12             | 0              | 1              | 0              | 1              | 5                 | 34.2%      | 0.0%       | 13.8%          | 0.0%           | 13.3%          | 0.0%           | 7.1%           | 13.3% |
| tr F1S590 F1S590 |         | 6             | 0          | 0          | 0              | 1              | 0              | 0              | 1              | 10         | 0          | 0              | 0              | 1              | 0              | 0              | 2                 | 15.6%      | 0.0%       | 0.0%           | 0.0%           | 3.6%           | 0.0%           | 0.0%           | 3.0%  |
| tr F1RSY4 F1RSY4 |         | 4             | 2          | 0          | 0              | 1              | 0              | 0              | 0              | 6          | 4          | 0              | 0              | 1              | 0              | 0              | 0                 | 13.7%      | 6.4%       | 0.0%           | 0.0%           | 3.3%           | 0.0%           | 0.0%           | 0.0%  |
| tr F1SIF8 F1SIF8 |         | 5             | 1          | 0          | 0              | 1              | 0              | 0              | 0              | 7          | 3          | 0              | 0              | 1              | 0              | 0              | 0                 | 6.0%       | 0.8%       | 0.0%           | 0.0%           | 0.8%           | 0.0%           | 0.0%           | 0.0%  |
| tr I3LKF2 I3LKF2 |         | 5             | 2          | 0          | 0              | 1              | 0              | 0              | 0              | 6          | 4          | 0              | 0              | 0              | 1              | 0              | 0                 | 2.0%       | 1.3%       | 0.0%           | 0.0%           | 0.0%           | 0.6%           | 0.0%           | 0.0%  |
| tr I3L667 I3L667 |         | 1             | 1          | 0          | 0              | 1              | 0              | 0              | 0              | 2          | 8          | 0              | 0              | 1              | 0              | 0              | 0                 | 3.5%       | 2.0%       | 0.0%           | 0.0%           | 3.0%           | 0.0%           | 0.0%           | 0.0%  |
| tr K7GP62 K7GP62 |         | 2             | 1          | 2          | 0              | 1              | 0              | 0              | 0              | 5          | 5          | 24             | 0              | 1              | 0              | 0              | 0                 | 6.3%       | 6.3%       | 12.7%          | 0.0%           | 6.3%           | 0.0%           | 0.0%           | 0.0%  |
| tr F1RLG5 F1RLG5 |         | 4             | 3          | 3          | 0              | 1              |                |                |                |            |            |                |                |                |                |                |                   |            |            |                |                |                |                |                |       |

| Sample#          | Peptide Count |            |            |                |                |                |                | Spectral Count |            |            |                |                |                |                | Sequence Coverage |            |            |                |                |                |                |       |       |       |
|------------------|---------------|------------|------------|----------------|----------------|----------------|----------------|----------------|------------|------------|----------------|----------------|----------------|----------------|-------------------|------------|------------|----------------|----------------|----------------|----------------|-------|-------|-------|
|                  | Whole Cell    | Whole Cell | Whole Cell | Cilia Fraction | Cilia Fraction | Cilia Fraction | Cilia Fraction | Whole Cell     | Whole Cell | Whole Cell | Cilia Fraction | Cilia Fraction | Cilia Fraction | Cilia Fraction | Whole Cell        | Whole Cell | Whole Cell | Cilia Fraction | Cilia Fraction | Cilia Fraction | Cilia Fraction |       |       |       |
|                  | 1             | 2          | 6          | 4              | 3              | 5              | 7              | 8              | 1          | 2          | 6              | 4              | 3              | 5              | 7                 | 8          | 1          | 2              | 6              | 4              | 3              | 5     | 7     | 8     |
| Accession        |               |            |            |                |                |                |                |                |            |            |                |                |                |                |                   |            |            |                |                |                |                |       |       |       |
| tr I3LC48 I3LC48 | 2             | 3          | 2          | 0              | 1              | 1              | 0              | 0              | 5          | 16         | 23             | 0              | 1              | 1              | 0                 | 0          | 7.8%       | 7.8%           | 7.8%           | 0.0%           | 5.1%           | 5.1%  | 0.0%  | 0.0%  |
| A5GFY8           | 18            | 11         | 14         | 2              | 5              | 2              | 7              | 9              | 65         | 51         | 98             | 2              | 7              | 2              | 111               | 102        | 49.3%      | 28.7%          | 28.5%          | 1.7%           | 7.5%           | 3.8%  | 19.5% | 26.8% |
| tr I3LQ79 I3LQ79 | 19            | 3          | 13         | 1              | 0              | 1              | 7              | 18             | 47         | 6          | 431            | 1              | 0              | 4              | 31                | 131        | 28.2%      | 4.9%           | 20.0%          | 1.7%           | 0.0%           | 2.8%  | 13.8% | 33.6% |
| tr F1SUZ5 F1SUZ5 | 16            | 10         | 3          | 0              | 5              | 0              | 1              | 0              | 43         | 42         | 12             | 0              | 8              | 0              | 1                 | 0          | 21.2%      | 18.1%          | 9.6%           | 0.0%           | 8.5%           | 0.0%  | 2.7%  | 0.0%  |
| tr F1SAD9 F1SAD9 | 26            | 7          | 19         | 0              | 1              | 2              | 4              | 8              | 56         | 61         | 385            | 0              | 1              | 10             | 32                | 38         | 36.2%      | 7.7%           | 28.8%          | 0.0%           | 1.4%           | 3.1%  | 11.9% | 24.0% |
| tr F2Z5G8 F2Z5G8 | 6             | 6          | 3          | 0              | 1              | 1              | 1              | 1              | 18         | 14         | 23             | 0              | 1              | 2              | 7                 | 10         | 24.0%      | 25.6%          | 24.0%          | 0.0%           | 7.2%           | 10.4% | 8.8%  | 8.8%  |
| tr F1RQ91 F1RQ91 | 13            | 12         | 7          | 1              | 3              | 2              | 1              | 1              | 30         | 56         | 63             | 1              | 4              | 3              | 1                 | 1          | 41.1%      | 46.4%          | 24.3%          | 3.4%           | 15.6%          | 14.4% | 4.9%  | 4.9%  |
| tr F1SS99 F1SS99 | 5             | 2          | 1          | 0              | 2              | 2              | 1              | 0              | 11         | 43         | 9              | 0              | 2              | 3              | 2                 | 0          | 20.5%      | 3.8%           | 4.6%           | 0.0%           | 7.3%           | 3.8%  | 3.8%  | 0.0%  |
| tr F1S431 F1S431 | 19            | 5          | 7          | 0              | 5              | 2              | 7              | 3              | 45         | 53         | 32             | 0              | 7              | 2              | 34                | 7          | 30.0%      | 6.7%           | 11.7%          | 0.0%           | 4.8%           | 1.6%  | 10.9% | 7.5%  |
| tr D0G7F6 D0G7F6 | 31            | 22         | 17         | 5              | 10             | 1              | 4              | 14             | 162        | 143        | 710            | 11             | 16             | 1              | 202               | 165        | 85.5%      | 83.9%          | 73.0%          | 35.1%          | 53.2%          | 5.2%  | 30.6% | 69.8% |
| P00346           | 28            | 15         | 15         | 2              | 3              | 1              | 1              | 3              | 114        | 115        | 282            | 8              | 11             | 2              | 20                | 5          | 72.8%      | 62.7%          | 43.2%          | 8.0%           | 13.6%          | 5.6%  | 5.6%  | 10.1% |
| tr I3LP41 I3LP41 | 28            | 15         | 15         | 2              | 3              | 1              | 1              | 3              | 114        | 115        | 282            | 8              | 11             | 2              | 20                | 5          | 72.8%      | 62.7%          | 43.2%          | 8.0%           | 13.6%          | 5.6%  | 5.6%  | 10.1% |
| tr F1S9Y8 F1S9Y8 | 23            | 7          | 3          | 0              | 3              | 1              | 0              | 3              | 41         | 25         | 14             | 0              | 4              | 2              | 0                 | 6          | 18.3%      | 6.5%           | 2.8%           | 0.0%           | 2.4%           | 1.1%  | 0.0%  | 4.9%  |
| tr F2Z5F1 F2Z5F1 | 1             | 1          | 0          | 1              | 1              | 0              | 0              | 0              | 1          | 43         | 0              | 1              | 3              | 0              | 0                 | 0          | 9.6%       | 8.8%           | 0.0%           | 0.0%           | 8.8%           | 0.0%  | 0.0%  | 0.0%  |
| tr I3LU04 I3LU04 | 7             | 2          | 4          | 1              | 1              | 0              | 1              | 1              | 17         | 5          | 25             | 1              | 1              | 0              | 24                | 12         | 32.0%      | 7.7%           | 16.0%          | 3.7%           | 3.7%           | 0.0%  | 7.7%  | 7.7%  |
| tr F1S0C1 F1S0C1 | 8             | 3          | 3          | 1              | 1              | 0              | 0              | 6              | 14         | 8          | 21             | 1              | 1              | 0              | 0                 | 11         | 34.0%      | 11.8%          | 8.6%           | 6.4%           | 6.4%           | 0.0%  | 0.0%  | 27.0% |
| A1XQU1           | 6             | 5          | 2          | 0              | 0              | 2              | 0              | 0              | 7          | 15         | 9              | 0              | 0              | 2              | 0                 | 0          | 38.3%      | 5.4%           | 9.0%           | 0.0%           | 0.0%           | 5.1%  | 0.0%  | 0.0%  |
| tr F1RN21 F1RN21 | 4             | 1          | 5          | 0              | 1              | 0              | 5              | 5              | 10         | 1          | 38             | 0              | 1              | 0              | 298               | 124        | 6.2%       | 3.5%           | 6.2%           | 0.0%           | 2.4%           | 0.0%  | 6.2%  | 6.2%  |
| tr I3LN55 I3LN55 | 4             | 1          | 5          | 0              | 1              | 0              | 5              | 5              | 10         | 1          | 38             | 0              | 1              | 0              | 298               | 124        | 3.0%       | 1.7%           | 3.0%           | 0.0%           | 1.2%           | 0.0%  | 3.0%  | 3.0%  |
| tr I3LSF7 I3LSF7 | 1             | 1          | 0          | 0              | 1              | 0              | 0              | 5              | 1          | 10         | 0              | 0              | 1              | 0              | 0                 | 21         | 3.1%       | 1.2%           | 0.0%           | 0.0%           | 1.2%           | 0.0%  | 0.0%  | 8.8%  |
| tr F1SG93 F1SG93 | 1             | 1          | 1          | 0              | 1              | 0              | 0              | 5              | 1          | 10         | 2              | 0              | 1              | 0              | 0                 | 21         | 3.0%       | 1.2%           | 1.5%           | 0.0%           | 1.2%           | 0.0%  | 0.0%  | 8.6%  |
| tr I3LRZ4 I3LRZ4 | 1             | 1          | 1          | 0              | 1              | 0              | 0              | 5              | 1          | 10         | 2              | 0              | 1              | 0              | 0                 | 21         | 3.2%       | 1.2%           | 1.6%           | 0.0%           | 1.2%           | 0.0%  | 0.0%  | 9.0%  |
| tr F1SRI1 F1SRI1 | 5             | 2          | 0          | 0              | 1              | 0              | 0              | 2              | 8          | 3          | 0              | 0              | 1              | 0              | 0                 | 12         | 20.9%      | 10.4%          | 0.0%           | 0.0%           | 8.0%           | 0.0%  | 0.0%  | 10.9% |
| tr I3L916 I3L916 | 3             | 3          | 3          | 0              | 1              | 0              | 0              | 4              | 3          | 8          | 19             | 0              | 1              | 0              | 0                 | 20         | 4.8%       | 6.2%           | 7.7%           | 0.0%           | 2.7%           | 0.0%  | 0.0%  | 10.4% |
| tr F1SKY2 F1SKY2 | 3             | 2          | 4          | 0              | 0              | 1              | 1              | 1              | 4          | 7          | 22             | 0              | 0              | 1              | 5                 | 2          | 18.4%      | 7.8%           | 26.9%          | 0.0%           | 0.0%           | 4.2%  | 12.4% | 4.2%  |
| tr I3LSD1 I3LSD1 | 6             | 1          | 1          | 1              | 0              | 0              | 0              | 1              | 10         | 1          | 11             | 1              | 0              | 0              | 0                 | 3          | 9.7%       | 1.7%           | 3.1%           | 1.7%           | 0.0%           | 0.0%  | 0.0%  | 4.9%  |
| tr I3LR20 I3LR20 | 1             | 5          | 1          | 0              | 0              | 1              | 1              | 2              | 3          | 8          | 6              | 0              | 0              | 1              | 1                 | 0          | 1.0%       | 4.4%           | 1.6%           | 0.0%           | 0.0%           | 1.0%  | 1.0%  | 0.0%  |
| tr F1RLP9 F1RLP9 | 7             | 1          | 1          | 0              | 1              | 0              | 0              | 1              | 10         | 1          | 8              | 0              | 1              | 0              | 0                 | 1          | 16.3%      | 1.7%           | 1.7%           | 0.0%           | 1.0%           | 0.0%  | 0.0%  | 2.5%  |
| tr F1SKD4 F1SKD4 | 2             | 1          | 0          | 0              | 1              | 0              | 0              | 0              | 2          | 9          | 0              | 0              | 1              | 0              | 0                 | 0          | 2.1%       | 0.6%           | 0.0%           | 0.0%           | 0.6%           | 0.0%  | 0.0%  | 0.0%  |
| tr I3LLT3 I3LLT3 | 4             | 0          | 0          | 0              | 1              | 0              | 0              | 0              | 11         | 0          | 0              | 0              | 1              | 0              | 0                 | 0          | 19.8%      | 0.0%           | 0.0%           | 0.0%           | 7.3%           | 0.0%  | 0.0%  | 0.0%  |
| tr F1RPJ8 F1RPJ8 | 2             | 2          | 0          | 0              | 1              | 0              | 0              | 0              | 2          | 9          | 0              | 0              | 1              | 0              | 0                 | 0          | 6.2%       | 3.5%           | 0.0%           | 0.0%           | 1.9%           | 0.0%  | 0.0%  | 0.0%  |
| tr K7GM11 K7GM11 | 2             | 2          | 0          | 0              | 1              | 0              | 0              | 0              | 2          | 9          | 0              | 0              | 1              | 0              | 0                 | 0          | 6.7%       | 3.7%           | 0.0%           | 0.0%           | 2.0%           | 0.0%  | 0.0%  | 0.0%  |
| tr F1S0B2 F1S0B2 | 1             | 1          | 0          | 0              | 0              | 1              | 0              | 0              | 4          | 7          | 0              | 0              | 0              | 1              | 0                 | 0          | 5.1%       | 5.1%           | 0.0%           | 0.0%           | 0.0%           | 5.1%  | 0.0%  | 0.0%  |
| tr F1SMJ3 F1SMJ3 | 4             | 1          | 1          | 0              | 0              | 1              | 0              | 0              | 4          | 7          | 3              | 0              | 0              | 0              | 1                 | 0          | 13.9%      | 2.1%           | 1.9%           | 0.0%           | 0.0%           | 2.1%  | 0.0%  | 0.0%  |
| tr F1S7C4 F1S7C4 | 3             | 1          | 2          | 0              | 1              | 0              | 0              | 0              | 6          | 5          | 3              | 0              | 1              | 0              | 0                 | 0          | 4.8%       | 1.0%           | 2.2%           | 0.0%           | 1.0%           | 0.0%  | 0.0%  | 0.0%  |
| tr F2Z5Q7 F2Z5Q7 | 5             | 1          | 1          | 0              | 0              | 1              | 0              | 0              | 5          | 6          | 4              | 0              | 0              | 1              | 0                 | 0          | 30.2%      | 7.7%           | 7.1%           | 0.0%           | 0.0%           | 7.7%  | 0.0%  | 0.0%  |
| tr F1S1B9 F1S1B9 | 4             | 2          | 1          | 1              | 0              | 0              | 0              | 0              | 5          | 6          | 5              | 1              | 0              | 0              | 0                 | 0          | 30.6%      | 12.2%          | 6.7%           | 6.7%           | 0.0%           | 0.0%  | 0.0%  | 0.0%  |
| tr F1SB11 F1SB11 | 6             | 1          | 2          | 0              | 1              | 0              | 0              | 0              | 7          | 4          | 9              | 0              | 1              | 0              | 0                 | 0          | 25.4%      | 3.4%           | 6.3%           | 0.0%           | 3.4%           | 0.0%  | 0.0%  | 0.0%  |
| tr F1S8H5 F1S8H5 | 5             | 0          | 5          | 0              | 1              | 0              | 1              | 0              | 11         | 0          | 56             | 0              | 1              | 0              | 2                 | 0          | 27.8%      | 0.0%           | 21.5%          | 0.0%           | 5.7%           | 0.0%  | 4.7%  | 0.0%  |
| tr K7GQ06 K7GQ06 | 4             | 1          | 4          | 1              | 0              | 0              | 0              | 0              | 6          | 5          | 13             | 1              | 0              | 0              | 0                 | 0          | 23.3%      | 4.9%           | 19.9%          | 4.9%           | 0.0%           | 0.0%  | 0.0%  | 0.0%  |
| tr I3LI13 I3LI13 | 73            | 48         | 26         | 6              | 18             | 11             | 17             | 26             | 635        | 605        | 214            | 17             | 68             | 27             | 233               | 315        | 67.1%      | 50.1%          | 27.9%          | 10.1%          | 23.3%          | 11.5% | 27.2% | 39.2% |
| tr F1RYI3 F1RYI3 | 27            | 13         | 9          | 3              | 3              | 1              | 3              | 8              | 61         | 72         | 74             | 6              | 5              | 1              | 18                | 18         | 32.0%      | 15.4%          | 8.1%           | 3.1%           | 3.0%           | 1.1%  | 5.7%  | 9.9%  |
| tr F1SQN1 F1SQN1 | 24            | 10         | 11         | 1              | 2              | 1              | 6              | 10             | 60         | 63         | 260            | 1              | 6              | 4              | 23                | 24         | 51.8%      | 27.1%          | 26.0%          | 3.5%           | 5.8%           | 2.2%  | 17.8% | 28.8% |
| tr F1SL99 F1SL99 | 7             | 4          | 5          | 0              | 1              | 0              | 1              | 3              | 23         | 22         | 12             | 0              | 4              | 0              | 1                 | 24         | 27.5%      | 23.1%          | 26.2%          | 0.0%           | 7.5%           | 0.0%  | 7.5%  | 27.5% |
| tr F1RUV5 F1RUV5 | 18            | 1          | 3          | 0              | 1              | 0              | 0              | 0              | 33         | 1          | 29             | 0              | 2              | 1              | 0                 | 0          | 36.0%      | 1.8%           | 5.7%           | 0.0%           | 2.1%           | 2.2%  | 0.0%  | 0.0%  |
| tr F1SGR0 F1SGR0 | 9             | 5          | 0          | 0              | 3              | 0              | 0              | 3              | 33         | 24         | 0              | 0              | 5              | 0              | 0                 | 6          | 30.7%      | 14.2%          | 0.0%           | 0.0%           | 8.6%           | 0.0%  | 0.0%  | 13.1% |
| tr F1RSE7 F1RSE7 | 8             | 9          | 1          | 0              | 1              | 1              | 0              | 0              | 11         | 46         | 11             | 0              | 4              | 1              | 0                 | 0          | 13.9%      | 8.6%           | 2.9%           | 0.0%           | 1.6%           | 1.6%  | 0.0%  | 0.0%  |
| tr F1RX74 F1RX74 | 12            | 5          | 5          | 1              | 2              | 1              | 1              | 6              | 56         | 24         | 37             | 2              | 4              | 1              | 50                | 26         | 25.8%      | 13.0%          | 10.8%          | 4.5%           | 8.8%           | 4.5%  | 4.5%  | 15.9% |
| Q7M2W6           | 22            | 9          | 13         | 3              | 6              | 2              | 4              | 13             | 435        | 148        | 342            | 13             | 34             | 4              | 481               | 513        | 71.4%      | 46.3%          | 56.6%          | 23.4%          | 38.9%          | 23.4% | 25.7% | 47.4% |
| tr I3LJE2 I3LJE2 | 24            | 13         | 18         | 1              | 3              | 2              | 8              | 17             | 50         | 76         | 153            | 1              | 6              | 4              | 53                | 70         | 45.5%      | 26.6%          | 28.8%          | 2.4%           | 5.8%           | 1.5%  | 16.5% | 36.9% |
| tr F1RRK9 F1RRK9 | 31            | 20         | 17         | 2              | 8              | 3              | 4              | 17             | 107        | 260        | 84             | 4              | 22             | 6              | 5                 | 9          | 32.9%      | 14.6%          | 17.0%          | 2.1%           | 10.7%          | 2.1%  | 3.5%  | 8.6%  |
| tr B8XH67 B8XH67 | 10            | 5          | 8          | 0              | 1              | 0              | 3              | 16             | 11         | 12         | 122            | 0              | 2              | 0              | 68                | 174        | 40.0%      | 19.2%          | 30.4%          | 0.0%           | 7.4%           | 0.0%  | 20.0% | 52.3% |
| tr I3LPP4 I3LPP4 | 8             | 3          | 2          | 0              | 2              | 0              | 2              | 0              | 16         | 7          | 14             | 0              | 2              | 0              | 6                 | 0          | 21.9%      | 6.4%           | 5.6%           | 0.0%           | 4.4%           | 0.0%  | 4.6%  | 0.0%  |
| tr I3LSC0 I3LSC0 | 1             | 5          | 0          | 0              | 0              | 2              | 0              | 0              | 3          | 20         | 0              | 0              | 0              | 2              | 0                 | 0          | 11.4%      | 21.0%          | 0.0%           | 0.0%           | 0.0%           | 9.7%  | 0.0%  | 0.0%  |
| tr I3LGO9 I3LGO9 | 0             | 2          | 3          | 0              | 1              | 1              | 0              | 0              | 0          | 23         | 10             | 0              | 1              | 1              | 0                 | 0          | 0.0%       | 5.8%           | 13.7%          | 0.0%           | 3.0%           | 3.0%  | 0.0%  | 0.0%  |
| Q29371           | 25            | 18         | 14         | 3              | 8              | 1              | 3              | 9              | 140        | 125        | 505            | 9              | 13             | 1              | 186               | 105        | 62.5%      | 60.9%          | 50.0%          | 16.9%          | 41.9%          | 5.2%  | 19.0% | 46.4% |
| tr I3LSB3 I3LSB3 | 33            | 8          | 42         | 0              | 2              | 3              | 12             | 11             | 58         | 23         | 652            | 0              | 3              | 4              | 91                | 51         | 24.2%      | 5.7%           | 31.8%          | 0.0%           | 2.3%           | 2.6%  | 12.2% | 11.2% |
| tr F1RVY7 F1RVY7 | 13            | 2          | 6          | 1              | 1              | 0              | 0              | 3              | 27         | 8          | 12             | 1              | 2              | 0              | 0                 | 6          | 38.1%      | 5.0%           | 16.4%          | 2.6%           | 2.6%           | 0.0%  | 0.0%  | 6.9%  |
| Q29197           | 6             | 8          | 7          | 0              | 2              | 1              | 0              | 1              | 12         | 23         | 31             | 0              | 2              | 1              | 0                 | 4          | 26.9%      | 38.5%          | 35.4%          | 0.0%           | 13.1%          | 7.7%  | 0.0%  | 7.7%  |
| tr I3L6D0 I3L6D0 | 17            | 3          | 7          | 1              | 1              | 0              | 0              | 0              | 26         | 9          | 60             | 1              | 2              | 0              | 0                 | 0          | 19.9%      | 2.7%           | 6.2%           | 1.5%           | 1.4%           | 0.0%  | 0.0%  | 0.0%  |
| tr F1SEF7 F1SEF7 | 20            | 4          | 7          | 1              | 1              | 0              | 5              | 15             | 51         | 31         | 55             | 1              | 6              | 0              | 70                | 50         | 46.8%      | 12.5%          | 20.5%          | 4.2%           | 4.2%           | 0.0%  | 23.7% | 54.5% |
| P61292           | 20            | 4          | 7          | 1              | 1              | 0              | 5              | 15             | 51         | 31         | 5              |                |                |                |                   |            |            |                |                |                |                |       |       |       |

| Accession        | Sample# | Peptide Count |            |            |                |                |                |                | Spectral Count |            |            |                |                |                |                |                | Sequence Coverage |            |            |                |                |                |                |                |       |
|------------------|---------|---------------|------------|------------|----------------|----------------|----------------|----------------|----------------|------------|------------|----------------|----------------|----------------|----------------|----------------|-------------------|------------|------------|----------------|----------------|----------------|----------------|----------------|-------|
|                  |         | Whole Cell    | Whole Cell | Whole Cell | Cilia Fraction | Cilia Fraction | Cilia Fraction | Cilia Fraction | Whole Cell     | Whole Cell | Whole Cell | Cilia Fraction | Whole Cell        | Whole Cell | Whole Cell | Cilia Fraction |       |
|                  |         | 1             | 2          | 6          | 4              | 3              | 5              | 7              | 8              | 1          | 2          | 6              | 4              | 3              | 5              | 7              | 8                 | 1          | 2          | 6              | 4              | 3              | 5              | 7              | 8     |
| tr F1RWI8 F1RWI8 |         | 4             | 1          | 2          | 0              | 1              | 0              | 0              | 2              | 9          | 3          | 3              | 0              | 1              | 0              | 0              | 5                 | 19.8%      | 3.3%       | 8.0%           | 0.0%           | 3.3%           | 0.0%           | 0.0%           | 4.2%  |
| tr F1RG35 F1RG35 |         | 8             | 1          | 1          | 0              | 1              | 0              | 0              | 1              | 10         | 2          | 1              | 0              | 1              | 0              | 0              | 4                 | 34.7%      | 3.6%       | 5.0%           | 0.0%           | 3.6%           | 0.0%           | 0.0%           | 3.0%  |
| tr F1SIS9 F1SIS9 |         | 5             | 1          | 2          | 0              | 1              | 0              | 0              | 1              | 11         | 1          | 4              | 0              | 1              | 0              | 0              | 2                 | 17.1%      | 2.5%       | 6.7%           | 0.0%           | 6.2%           | 0.0%           | 0.0%           | 7.0%  |
| tr F1S3I3 F1S3I3 |         | 6             | 1          | 6          | 0              | 0              | 1              | 1              | 3              | 8          | 4          | 30             | 0              | 0              | 1              | 2              | 3                 | 27.3%      | 2.8%       | 22.4%          | 0.0%           | 0.0%           | 2.8%           | 4.0%           | 11.8% |
| tr F1SR01 F1SR01 |         | 5             | 2          | 0          | 0              | 1              | 0              | 0              | 0              | 6          | 6          | 0              | 0              | 1              | 0              | 0              | 0                 | 8.9%       | 4.0%       | 0.0%           | 0.0%           | 2.8%           | 0.0%           | 0.0%           | 0.0%  |
| tr K7GMQ4 K7GMQ4 |         | 1             | 1          | 0          | 0              | 1              | 0              | 0              | 0              | 2          | 10         | 0              | 0              | 1              | 0              | 0              | 0                 | 11.1%      | 11.1%      | 0.0%           | 0.0%           | 11.1%          | 0.0%           | 0.0%           | 0.0%  |
| tr I3LBL5 I3LBL5 |         | 2             | 3          | 0          | 0              | 1              | 0              | 0              | 0              | 8          | 4          | 0              | 0              | 1              | 0              | 0              | 0                 | 34.1%      | 61.2%      | 0.0%           | 0.0%           | 34.1%          | 0.0%           | 0.0%           | 0.0%  |
| tr K7GL68 K7GL68 |         | 1             | 1          | 0          | 0              | 1              | 0              | 0              | 0              | 2          | 10         | 0              | 0              | 1              | 0              | 0              | 0                 | 21.1%      | 21.1%      | 0.0%           | 0.0%           | 21.1%          | 0.0%           | 0.0%           | 0.0%  |
| tr F1SEX4 F1SEX4 |         | 0             | 1          | 0          | 0              | 1              | 0              | 0              | 0              | 0          | 12         | 0              | 0              | 1              | 0              | 0              | 0                 | 0.0%       | 7.3%       | 0.0%           | 0.0%           | 7.3%           | 0.0%           | 0.0%           | 0.0%  |
| Q6Q2C2           |         | 3             | 3          | 2          | 1              | 0              | 0              | 0              | 0              | 3          | 9          | 2              | 1              | 0              | 0              | 0              | 0                 | 9.7%       | 6.3%       | 5.9%           | 3.8%           | 0.0%           | 0.0%           | 0.0%           | 0.0%  |
| tr I3LDY2 I3LDY2 |         | 5             | 3          | 1          | 0              | 1              | 0              | 0              | 0              | 7          | 5          | 3              | 0              | 1              | 0              | 0              | 0                 | 30.3%      | 11.5%      | 7.0%           | 0.0%           | 4.2%           | 0.0%           | 0.0%           | 0.0%  |
| tr I3LC09 I3LC09 |         | 7             | 1          | 3          | 0              | 1              | 0              | 0              | 0              | 9          | 3          | 19             | 0              | 1              | 0              | 0              | 0                 | 16.3%      | 2.2%       | 7.4%           | 0.0%           | 2.2%           | 0.0%           | 0.0%           | 0.0%  |
| tr F1SLX5 F1SLX5 |         | 1             | 2          | 6          | 0              | 1              | 0              | 0              | 0              | 1          | 11         | 23             | 0              | 1              | 0              | 0              | 0                 | 2.7%       | 4.3%       | 6.9%           | 0.0%           | 1.8%           | 0.0%           | 0.0%           | 0.0%  |
| tr F1RQU2 F1RQU2 |         | 74            | 43         | 47         | 6              | 11             | 4              | 14             | 26             | 570        | 432        | 472            | 21             | 54             | 8              | 195            | 335               | 62.3%      | 52.1%      | 44.1%          | 10.2%          | 21.1%          | 8.7%           | 26.5%          | 37.4% |
| tr I3LK24 I3LK24 |         | 19            | 6          | 8          | 1              | 2              | 1              | 4              | 7              | 28         | 33         | 31             | 1              | 3              | 1              | 34             | 25                | 27.3%      | 7.2%       | 9.9%           | 1.0%           | 3.7%           | 1.5%           | 9.7%           | 14.1% |
| tr F1RH60 F1RH60 |         | 19            | 6          | 8          | 1              | 2              | 1              | 4              | 7              | 28         | 33         | 31             | 1              | 3              | 1              | 34             | 25                | 26.7%      | 7.1%       | 9.7%           | 1.0%           | 3.6%           | 1.4%           | 9.5%           | 13.8% |
| tr F1RWI5 F1RWI5 |         | 15            | 12         | 7          | 1              | 5              | 1              | 2              | 3              | 91         | 80         | 80             | 2              | 10             | 2              | 8              | 12                | 33.9%      | 30.0%      | 24.1%          | 5.4%           | 21.8%          | 4.3%           | 11.7%          | 11.7% |
| tr E1CAJ6 E1CAJ6 |         | 19            | 6          | 6          | 1              | 3              | 1              | 3              | 6              | 56         | 30         | 84             | 1              | 4              | 2              | 18             | 53                | 47.3%      | 18.6%      | 16.1%          | 3.4%           | 6.1%           | 2.5%           | 5.7%           | 27.3% |
| tr F1RUK8 F1RUK8 |         | 33            | 13         | 19         | 1              | 6              | 3              | 7              | 17             | 155        | 42         | 136            | 1              | 12             | 3              | 66             | 74                | 58.2%      | 36.0%      | 44.3%          | 5.4%           | 19.1%          | 10.3%          | 21.1%          | 44.0% |
| tr F1SGD7 F1SGD7 |         | 15            | 9          | 10         | 2              | 4              | 1              | 1              | 4              | 80         | 107        | 63             | 7              | 7              | 1              | 2              | 11                | 40.4%      | 35.8%      | 26.6%          | 10.2%          | 20.7%          | 2.8%           | 4.9%           | 19.7% |
| tr F1RQI7 F1RQI7 |         | 34            | 20         | 24         | 1              | 7              | 3              | 10             | 12             | 74         | 101        | 138            | 1              | 8              | 5              | 78             | 59                | 25.7%      | 17.1%      | 20.9%          | 1.4%           | 9.0%           | 2.2%           | 13.2%          | 11.7% |
| tr F1SF87 F1SF87 |         | 15            | 10         | 6          | 1              | 1              | 4              | 1              | 5              | 41         | 34         | 56             | 1              | 1              | 4              | 1              | 7                 | 30.6%      | 21.1%      | 9.6%           | 3.2%           | 1.5%           | 9.9%           | 5.5%           | 13.4% |
| tr I3LT81 I3LT81 |         | 8             | 2          | 3          | 0              | 0              | 2              | 1              | 2              | 21         | 4          | 15             | 0              | 0              | 0              | 2              | 2                 | 37.7%      | 6.0%       | 8.2%           | 0.0%           | 0.0%           | 6.0%           | 8.7%           | 18.6% |
| tr I3LI24 I3LI24 |         | 19            | 11         | 12         | 1              | 3              | 0              | 4              | 4              | 71         | 42         | 63             | 3              | 6              | 0              | 21             | 16                | 51.4%      | 48.6%      | 36.0%          | 2.8%           | 14.5%          | 0.0%           | 13.9%          | 11.4% |
| tr F1SNY2 F1SNY2 |         | 24            | 17         | 8          | 0              | 6              | 5              | 2              | 7              | 100        | 114        | 372            | 0              | 7              | 10             | 18             | 100               | 42.2%      | 36.0%      | 22.1%          | 0.0%           | 11.7%          | 14.4%          | 8.4%           | 23.8% |
| Q29I22           |         | 31            | 18         | 22         | 1              | 6              | 3              | 8              | 11             | 71         | 93         | 121            | 1              | 7              | 5              | 44             | 53                | 23.9%      | 15.8%      | 20.0%          | 1.4%           | 7.7%           | 2.2%           | 10.7%          | 10.8% |
| tr I3LSB2 I3LSB2 |         | 12            | 5          | 5          | 0              | 1              | 2              | 2              | 9              | 70         | 31         | 82             | 0              | 1              | 7              | 7              | 58                | 53.6%      | 41.2%      | 17.5%          | 0.0%           | 6.2%           | 6.2%           | 19.1%          | 47.4% |
| P42639           |         | 19            | 3          | 24         | 1              | 1              | 0              | 2              | 7              | 34         | 4          | 232            | 2              | 1              | 0              | 19             | 31                | 38.4%      | 7.7%       | 37.0%          | 3.5%           | 3.5%           | 0.0%           | 4.6%           | 31.3% |
| tr F1S2J4 F1S2J4 |         | 18            | 3          | 9          | 1              | 1              | 0              | 0              | 0              | 29         | 9          | 69             | 1              | 2              | 0              | 0              | 0                 | 21.4%      | 2.9%       | 8.3%           | 1.6%           | 1.6%           | 0.0%           | 0.0%           | 0.0%  |
| tr I3LK59 I3LK59 |         | 47            | 23         | 33         | 4              | 5              | 2              | 10             | 17             | 533        | 2018       | 597            | 83             | 55             | 63             | 671            | 417               | 67.5%      | 46.9%      | 39.0%          | 10.7%          | 16.1%          | 4.8%           | 38.4%          | 47.2% |
| tr I3LQ50 I3LQ50 |         | 23            | 13         | 18         | 1              | 6              | 1              | 0              | 7              | 79         | 137        | 358            | 1              | 15             | 1              | 0              | 56                | 45.3%      | 28.6%      | 35.6%          | 5.2%           | 14.6%          | 3.4%           | 0.0%           | 26.6% |
| Q19S50           |         | 18            | 3          | 7          | 0              | 2              | 0              | 3              | 4              | 35         | 16         | 22             | 0              | 4              | 0              | 32             | 23                | 34.5%      | 3.1%       | 14.8%          | 0.0%           | 2.3%           | 0.0%           | 7.9%           | 11.6% |
| tr I3LLF2 I3LLF2 |         | 12            | 4          | 5          | 1              | 3              | 0              | 2              | 4              | 46         | 5          | 27             | 1              | 3              | 0              | 14             | 15                | 23.6%      | 12.2%      | 12.2%          | 3.9%           | 10.6%          | 0.0%           | 5.3%           | 12.8% |
| tr F1RYY0 F1RYY0 |         | 12            | 8          | 6          | 0              | 2              | 0              | 3              | 4              | 26         | 25         | 54             | 0              | 4              | 0              | 25             | 9                 | 28.9%      | 24.1%      | 12.7%          | 0.0%           | 9.9%           | 0.0%           | 11.0%          | 11.0% |
| tr F1SLA0 F1SLA0 |         | 41            | 22         | 24         | 4              | 6              | 4              | 8              | 22             | 401        | 111        | 904            | 13             | 16             | 11             | 58             | 190               | 72.0%      | 53.8%      | 44.1%          | 9.7%           | 17.8%          | 10.0%          | 15.9%          | 47.7% |
| tr F1SQ11 F1SQ11 |         | 47            | 26         | 27         | 3              | 13             | 4              | 8              | 19             | 308        | 166        | 686            | 5              | 26             | 6              | 266            | 244               | 47.1%      | 45.1%      | 35.3%          | 5.1%           | 32.2%          | 5.1%           | 13.8%          | 23.8% |
| tr F1SHD7 F1SHD7 |         | 13            | 4          | 9          | 0              | 1              | 2              | 0              | 4              | 27         | 50         | 52             | 0              | 3              | 3              | 0              | 6                 | 26.1%      | 7.7%       | 14.0%          | 0.0%           | 1.8%           | 6.5%           | 0.0%           | 8.9%  |
| tr F2Z5S8 F2Z5S8 |         | 36            | 18         | 25         | 4              | 10             | 3              | 8              | 16             | 348        | 65         | 433            | 12             | 15             | 5              | 126            | 221               | 75.8%      | 66.5%      | 67.3%          | 21.8%          | 41.5%          | 15.3%          | 26.2%          | 41.5% |
| tr I3LFQ5 I3LFQ5 |         | 23            | 11         | 7          | 0              | 3              | 0              | 6              | 16             | 56         | 35         | 70             | 0              | 7              | 0              | 123            | 39                | 33.1%      | 16.3%      | 11.6%          | 0.0%           | 5.7%           | 0.0%           | 14.3%          | 29.6% |
| P10775           |         | 23            | 7          | 25         | 0              | 3              | 0              | 11             | 9              | 47         | 18         | 359            | 0              | 5              | 0              | 159            | 67                | 62.5%      | 22.8%      | 62.5%          | 0.0%           | 6.1%           | 0.0%           | 32.2%          | 25.2% |
| tr F1RVN0 F1RVN0 |         | 13            | 4          | 7          | 0              | 3              | 0              | 1              | 6              | 54         | 11         | 100            | 0              | 5              | 0              | 3              | 26                | 61.7%      | 24.0%      | 29.1%          | 0.0%           | 20.4%          | 0.0%           | 8.2%           | 34.7% |
| P12026           |         | 9             | 8          | 8          | 0              | 3              | 1              | 2              | 7              | 44         | 34         | 83             | 0              | 4              | 2              | 36             | 64                | 73.6%      | 66.7%      | 63.2%          | 0.0%           | 32.2%          | 11.5%          | 20.7%          | 51.7% |
| tr F1RYU9 F1RYU9 |         | 18            | 2          | 11         | 0              | 2              | 0              | 2              | 1              | 31         | 8          | 35             | 0              | 3              | 0              | 3              | 4                 | 29.1%      | 2.6%       | 16.0%          | 0.0%           | 3.4%           | 0.0%           | 4.6%           | 3.2%  |
| tr I3LQE2 I3LQE2 |         | 19            | 3          | 7          | 1              | 1              | 0              | 0              | 0              | 30         | 9          | 60             | 1              | 2              | 0              | 0              | 0                 | 22.8%      | 2.9%       | 6.7%           | 1.6%           | 1.6%           | 0.0%           | 0.0%           | 0.0%  |
| tr F1S3C7 F1S3C7 |         | 11            | 5          | 1          | 0              | 2              | 0              | 2              | 5              | 18         | 8          | 6              | 0              | 2              | 0              | 9              | 25                | 19.3%      | 7.8%       | 3.3%           | 0.0%           | 4.3%           | 0.0%           | 3.7%           | 8.3%  |
| P79381           |         | 15            | 0          | 5          | 0              | 0              | 2              | 1              | 8              | 26         | 0          | 86             | 0              | 0              | 2              | 1              | 61                | 33.5%      | 0.0%       | 12.3%          | 0.0%           | 0.0%           | 7.0%           | 2.2%           | 19.8% |
| tr F1SRG2 F1SRG2 |         | 2             | 2          | 0          | 0              | 1              | 0              | 0              | 1              | 4          | 22         | 0              | 0              | 2              | 0              | 0              | 1                 | 12.5%      | 11.7%      | 0.0%           | 0.0%           | 11.7%          | 0.0%           | 0.0%           | 11.7% |
| tr F2Z5S3 F2Z5S3 |         | 4             | 1          | 2          | 0              | 1              | 0              | 1              | 1              | 9          | 4          | 6              | 0              | 1              | 0              | 17             | 7                 | 16.8%      | 11.5%      | 35.4%          | 0.0%           | 11.5%          | 0.0%           | 21.2%          | 21.2% |
| tr F1SSF5 F1SSF5 |         | 4             | 2          | 0          | 0              | 1              | 0              | 1              | 1              | 7          | 6          | 0              | 0              | 1              | 0              | 2              | 2                 | 21.3%      | 7.8%       | 0.0%           | 0.0%           | 3.4%           | 0.0%           | 5.7%           | 4.4%  |
| tr K7GNM9 K7GNM9 |         | 2             | 1          | 1          | 0              | 1              | 0              | 1              | 1              | 3          | 10         | 6              | 0              | 1              | 0              | 4              | 2                 | 17.5%      | 7.0%       | 7.0%           | 0.0%           | 7.0%           | 0.0%           | 7.0%           | 7.0%  |
| tr I3L9T4 I3L9T4 |         | 4             | 0          | 0          | 0              | 1              | 0              | 0              | 3              | 13         | 0          | 0              | 0              | 1              | 0              | 0              | 3                 | 18.1%      | 0.0%       | 0.0%           | 0.0%           | 6.1%           | 0.0%           | 0.0%           | 5.9%  |
| tr F1ST14 F1ST14 |         | 6             | 3          | 1          | 0              | 1              | 0              | 0              | 1              | 7          | 6          | 1              | 0              | 1              | 0              | 0              | 3                 | 18.3%      | 3.9%       | 2.4%           | 0.0%           | 2.0%           | 0.0%           | 0.0%           | 6.3%  |
| tr K7N7E7 K7N7E7 |         | 5             | 2          | 2          | 1              | 0              | 0              | 0              | 1              | 6          | 7          | 9              | 1              | 0              | 0              | 0              | 2                 | 9.8%       | 5.0%       | 3.3%           | 3.2%           | 0.0%           | 0.0%           | 0.0%           | 1.8%  |
| tr F1ST12 F1ST12 |         | 3             | 2          | 0          | 0              | 1              | 0              | 0              | 0              | 10         | 3          | 0              | 0              | 1              | 0              | 0              | 0                 | 2.6%       | 1.2%       | 0.0%           | 0.0%           | 0.8%           | 0.0%           | 0.0%           | 0.0%  |
| tr I3LQQ6 I3LQQ6 |         | 1             | 2          | 0          | 0              | 0              | 1              | 0              | 0              | 1          | 12         | 0              | 0              | 0              | 1              | 0              | 0                 | 2.8%       | 6.4%       | 0.0%           | 0.0%           | 0.0%           | 2.8%           | 0.0%           | 0.0%  |
| tr F2Z5B7 F2Z5B7 |         | 5             | 1          | 3          | 0              | 1              | 0              | 0              | 0              | 10         | 3          | 17             | 0              | 1              | 0              | 0              | 0                 | 32.1%      | 15.5%      | 38.1%          | 0.0%           | 15.5%          | 0.0%           | 0.0%           | 0.0%  |
| tr F2Z514 F2Z514 |         | 5             | 1          | 3          | 0              | 1              | 0              | 0              | 0              | 10         | 3          | 17             | 0              | 1              | 0              | 0              | 0                 | 32.9%      | 15.9%      | 39.0%          | 0.0%           | 15.9%          | 0.0%           | 0.0%           | 0.0%  |
| tr F1S5N0 F1S5N0 |         | 6             | 1          | 8          | 0              | 1              | 0              | 0              | 0              | 6          | 7          | 43             | 0              | 1              | 0              | 0              | 0                 | 15.2%      | 2.3%       | 18.6%          | 0.0%           | 2.3%           | 0.0%           | 0.0%           | 0.0%  |
| tr I3LMG2 I3LMG2 |         | 3             | 2          | 3          | 0              | 1              | 0              | 0              | 0              | 5          | 8          | 84             | 0              | 1              | 0              | 0              | 0                 | 8.9%       | 5.5%       | 8.9%           | 0.0%           | 2.7%           | 0.0%           | 0.0%           | 0.0%  |
| P00506           |         | 27            | 20         | 14         | 0              | 2              | 9              | 0              | 1              | 91         | 118        | 285            | 0              | 2              | 14             | 0              | 7                 | 64.0%      | 43.3%      | 28.1%          | 0.0%           | 8.4%           | 23.5%          | 0.0%           | 4.0%  |
| tr F1SFZ8 F1SFZ8 |         | 72            | 18         | 45         | 2              | 3              | 1              | 11             | 27             | 183        |            |                |                |                |                |                |                   |            |            |                |                |                |                |                |       |

| Accession        | Sample# | Peptide Count |            |            |                |                |                |                | Spectral Count |            |            |            |                |                |                |                | Sequence Coverage |            |            |            |                |                |                |                |                |
|------------------|---------|---------------|------------|------------|----------------|----------------|----------------|----------------|----------------|------------|------------|------------|----------------|----------------|----------------|----------------|-------------------|------------|------------|------------|----------------|----------------|----------------|----------------|----------------|
|                  |         | Whole Cell    | Whole Cell | Whole Cell | Cilia Fraction | Whole Cell | Whole Cell | Whole Cell | Cilia Fraction    | Whole Cell | Whole Cell | Whole Cell | Cilia Fraction |
|                  |         | 1             | 2          | 6          | 4              | 3              | 5              | 7              | 8              | 1          | 2          | 6          | 4              | 3              | 5              | 7              | 8                 | 1          | 2          | 6          | 4              | 3              | 5              | 7              | 8              |
| tr F1S3U9 F1S3U9 |         | 16            | 10         | 13         | 0              | 4              | 4              | 4              | 3              | 57         | 96         | 73         | 0              | 6              | 5              | 39             | 18                | 49.7%      | 34.5%      | 31.5%      | 0.0%           | 23.4%          | 15.2%          | 23.4%          | 23.4%          |
| tr I3L6A8 I3L6A8 |         | 22            | 14         | 11         | 1              | 7              | 2              | 3              | 4              | 84         | 236        | 48         | 2              | 17             | 4              | 5              | 9                 | 31.5%      | 15.8%      | 13.6%      | 1.6%           | 12.9%          | 1.6%           | 4.5%           | 11.3%          |
| A1XQV4           |         | 14            | 3          | 19         | 1              | 1              | 0              | 1              | 8              | 38         | 4          | 193        | 2              | 1              | 0              | 33             | 76                | 28.5%      | 7.7%       | 34.9%      | 3.5%           | 3.5%           | 0.0%           | 3.9%           | 27.1%          |
| tr I3LIC6 I3LIC6 |         | 10            | 5          | 1          | 0              | 2              | 0              | 0              | 0              | 17         | 11         | 1          | 0              | 2              | 0              | 0              | 0                 | 6.3%       | 2.5%       | 0.6%       | 0.0%           | 0.9%           | 0.0%           | 0.0%           | 0.0%           |
| tr F1S8S9 F1S8S9 |         | 11            | 3          | 4          | 0              | 2              | 0              | 0              | 0              | 17         | 11         | 14         | 0              | 2              | 0              | 0              | 0                 | 11.4%      | 2.0%       | 3.4%       | 0.0%           | 1.2%           | 0.0%           | 0.0%           | 0.0%           |
| tr F1S5D2 F1S5D2 |         | 8             | 1          | 1          | 1              | 0              | 0              | 1              | 7              | 13         | 1          | 2          | 1              | 0              | 0              | 5              | 29                | 43.6%      | 2.0%       | 7.9%       | 7.7%           | 0.0%           | 0.0%           | 7.7%           | 26.3%          |
| tr K7GPS0 K7GPS0 |         | 3             | 2          | 0          | 0              | 1              | 0              | 1              | 0              | 6          | 8          | 0          | 0              | 1              | 0              | 6              | 0                 | 15.4%      | 8.9%       | 0.0%       | 0.0%           | 6.1%           | 0.0%           | 6.1%           | 0.0%           |
| tr I3L5D4 I3L5D4 |         | 3             | 2          | 2          | 0              | 1              | 0              | 1              | 0              | 6          | 8          | 3          | 0              | 1              | 0              | 6              | 0                 | 13.8%      | 8.0%       | 3.2%       | 0.0%           | 5.5%           | 0.0%           | 5.5%           | 0.0%           |
| tr F1SSJ8 F1SSJ8 |         | 0             | 3          | 0          | 0              | 0              | 1              | 0              | 2              | 0          | 14         | 0          | 0              | 0              | 0              | 1              | 0                 | 3          | 0.0%       | 3.3%       | 0.0%           | 0.0%           | 1.5%           | 0.0%           | 4.9%           |
| tr F1RN05 F1RN05 |         | 3             | 2          | 3          | 0              | 1              | 0              | 0              | 1              | 6          | 8          | 8          | 0              | 1              | 0              | 0              | 1                 | 11.5%      | 5.9%       | 6.3%       | 0.0%           | 2.0%           | 0.0%           | 0.0%           | 4.3%           |
| tr A5D9J1 A5D9J1 |         | 7             | 2          | 0          | 1              | 0              | 0              | 0              | 0              | 11         | 3          | 0          | 1              | 0              | 0              | 0              | 0                 | 53.7%      | 15.4%      | 0.0%       | 6.9%           | 0.0%           | 0.0%           | 0.0%           | 0.0%           |
| tr F1RM55 F1RM55 |         | 7             | 2          | 0          | 1              | 0              | 0              | 0              | 0              | 9          | 5          | 0          | 1              | 0              | 0              | 0              | 0                 | 10.8%      | 2.5%       | 0.0%       | 1.3%           | 0.0%           | 0.0%           | 0.0%           | 0.0%           |
| P79335           |         | 2             | 2          | 0          | 0              | 0              | 1              | 0              | 0              | 2          | 12         | 0          | 0              | 0              | 0              | 1              | 0                 | 7.0%       | 6.2%       | 0.0%       | 0.0%           | 0.0%           | 2.7%           | 0.0%           | 0.0%           |
| tr I3L7H0 I3L7H0 |         | 2             | 2          | 1          | 0              | 1              | 0              | 0              | 0              | 2          | 12         | 5          | 0              | 1              | 0              | 0              | 0                 | 8.5%       | 5.0%       | 6.6%       | 0.0%           | 5.0%           | 0.0%           | 0.0%           | 0.0%           |
| tr I3LEQ0 I3LEQ0 |         | 5             | 3          | 2          | 0              | 1              | 0              | 0              | 0              | 9          | 5          | 7          | 0              | 1              | 0              | 0              | 0                 | 7.6%       | 4.5%       | 2.2%       | 0.0%           | 1.4%           | 0.0%           | 0.0%           | 0.0%           |
| tr I3LE01 I3LE01 |         | 6             | 0          | 1          | 0              | 1              | 0              | 0              | 0              | 14         | 0          | 7          | 0              | 1              | 0              | 0              | 0                 | 13.5%      | 0.0%       | 2.0%       | 0.0%           | 2.9%           | 0.0%           | 0.0%           | 0.0%           |
| tr F2Z5T5 F2Z5T5 |         | 45            | 33         | 16         | 10             | 16             | 6              | 12             | 32             | 864        | 1621       | 1502       | 33             | 77             | 67             | 1342           | 947               | 78.9%      | 71.8%      | 47.2%      | 22.6%          | 44.3%          | 14.2%          | 31.7%          | 67.8%          |
| tr F1SHL9 F1SHL9 |         | 65            | 38         | 35         | 12             | 19             | 4              | 24             | 41             | 887        | 460        | 1713       | 30             | 57             | 8              | 593            | 607               | 72.0%      | 66.1%      | 50.7%      | 21.7%          | 39.4%          | 8.5%           | 38.7%          | 53.7%          |
| tr F1RK98 F1RK98 |         | 37            | 29         | 12         | 9              | 14             | 6              | 11             | 26             | 787        | 1601       | 1198       | 31             | 70             | 67             | 1322           | 891               | 68.0%      | 59.6%      | 32.9%      | 20.7%          | 39.1%          | 14.2%          | 28.4%          | 51.8%          |
| tr F1RS49 F1RS49 |         | 14            | 3          | 3          | 0              | 2              | 0              | 2              | 1              | 25         | 32         | 17         | 0              | 4              | 0              | 8              | 2                 | 30.2%      | 6.2%       | 3.8%       | 0.0%           | 3.3%           | 0.0%           | 4.2%           | 3.3%           |
| tr F2Z5C7 F2Z5C7 |         | 18            | 13         | 13         | 1              | 1              | 2              | 5              | 5              | 53         | 47         | 91         | 2              | 3              | 2              | 53             | 37                | 49.6%      | 40.5%      | 39.4%      | 3.0%           | 3.0%           | 7.6%           | 17.0%          | 17.0%          |
| tr F1SR80 F1SR80 |         | 36            | 28         | 13         | 8              | 12             | 6              | 11             | 28             | 829        | 1618       | 1438       | 31             | 73             | 67             | 1340           | 930               | 56.9%      | 50.0%      | 36.3%      | 16.4%          | 29.6%          | 14.2%          | 27.7%          | 50.7%          |
| Q29375           |         | 10            | 5          | 4          | 0              | 1              | 2              | 0              | 2              | 24         | 19         | 24         | 0              | 1              | 2              | 0              | 5                 | 52.3%      | 34.1%      | 25.8%      | 0.0%           | 9.8%           | 10.6%          | 0.0%           | 23.5%          |
| tr Q0PY11 Q0PY11 |         | 43            | 24         | 24         | 0              | 9              | 6              | 10             | 26             | 842        | 382        | 787        | 0              | 73             | 12             | 1485           | 645               | 56.7%      | 49.1%      | 34.8%      | 0.0%           | 21.2%          | 17.3%          | 29.7%          | 43.1%          |
| tr F1SC47 F1SC47 |         | 20            | 7          | 7          | 1              | 1              | 0              | 1              | 0              | 54         | 33         | 225        | 4              | 2              | 0              | 9              | 0                 | 29.8%      | 12.5%      | 11.4%      | 1.5%           | 1.5%           | 0.0%           | 3.0%           | 0.0%           |
| P79303           |         | 6             | 3          | 3          | 1              | 1              | 0              | 1              | 2              | 8          | 21         | 13         | 1              | 1              | 0              | 6              | 8                 | 12.0%      | 6.9%       | 6.3%       | 3.0%           | 3.9%           | 0.0%           | 2.8%           | 6.7%           |
| Q29561           |         | 12            | 6          | 7          | 2              | 2              | 1              | 2              | 1              | 27         | 105        | 55         | 3              | 4              | 2              | 14             | 2                 | 36.7%      | 18.9%      | 34.7%      | 12.2%          | 12.2%          | 6.1%           | 12.8%          | 6.1%           |
| P67937           |         | 21            | 5          | 25         | 1              | 1              | 0              | 1              | 6              | 37         | 7          | 163        | 2              | 1              | 0              | 5              | 24                | 59.7%      | 16.9%      | 67.7%      | 4.0%           | 4.0%           | 0.0%           | 8.1%           | 33.9%          |
| tr F1SGF1 F1SGF1 |         | 4             | 3          | 3          | 0              | 1              | 0              | 1              | 1              | 7          | 37         | 8          | 0              | 3              | 0              | 3              | 1                 | 11.3%      | 11.3%      | 12.7%      | 0.0%           | 3.1%           | 0.0%           | 4.5%           | 5.2%           |
| tr F1SJR1 F1SJR1 |         | 9             | 6          | 6          | 1              | 2              | 1              | 1              | 3              | 31         | 28         | 77         | 1              | 2              | 1              | 21             | 35                | 43.6%      | 35.1%      | 35.1%      | 6.2%           | 13.3%          | 7.1%           | 12.8%          | 26.5%          |
| tr I3LSU1 I3LSU1 |         | 12            | 3          | 6          | 0              | 2              | 0              | 2              | 4              | 54         | 20         | 26         | 0              | 5              | 0              | 13             | 24                | 29.1%      | 7.9%       | 16.1%      | 0.0%           | 7.2%           | 0.0%           | 4.9%           | 14.2%          |
| tr K7GNZ3 K7GNZ3 |         | 9             | 7          | 2          | 1              | 1              | 1              | 1              | 2              | 42         | 33         | 8          | 1              | 2              | 2              | 1              | 8                 | 28.8%      | 27.4%      | 13.5%      | 6.0%           | 6.0%           | 6.0%           | 7.0%           | 13.0%          |
| tr F1RPQ3 F1RPQ3 |         | 7             | 3          | 3          | 0              | 1              | 1              | 2              | 1              | 22         | 23         | 9          | 0              | 2              | 1              | 8              | 1                 | 31.6%      | 12.3%      | 13.5%      | 0.0%           | 3.2%           | 3.2%           | 7.1%           | 4.5%           |
| tr D7RK08 D7RK08 |         | 7             | 5          | 0          | 1              | 2              | 0              | 0              | 1              | 9          | 36         | 0          | 1              | 2              | 0              | 0              | 4                 | 9.9%       | 6.8%       | 0.0%       | 1.7%           | 2.9%           | 0.0%           | 0.0%           | 2.7%           |
| tr K7GST8 K7GST8 |         | 14            | 5          | 7          | 0              | 1              | 1              | 2              | 7              | 33         | 12         | 252        | 0              | 2              | 1              | 7              | 29                | 60.7%      | 21.4%      | 31.7%      | 0.0%           | 5.3%           | 5.3%           | 14.5%          | 36.6%          |
| tr I3L161 I3L161 |         | 14            | 5          | 7          | 0              | 1              | 1              | 2              | 7              | 33         | 12         | 252        | 0              | 2              | 1              | 7              | 29                | 60.7%      | 21.4%      | 31.7%      | 0.0%           | 5.3%           | 5.3%           | 14.5%          | 36.6%          |
| tr F1RGK9 F1RGK9 |         | 11            | 3          | 6          | 0              | 1              | 0              | 2              | 5              | 23         | 7          | 15         | 0              | 2              | 0              | 18             | 58                | 12.5%      | 4.6%       | 9.3%       | 0.0%           | 0.9%           | 0.0%           | 3.4%           | 9.5%           |
| tr F1S3I9 F1S3I9 |         | 8             | 4          | 2          | 1              | 1              | 0              | 0              | 1              | 21         | 9          | 9          | 1              | 1              | 0              | 0              | 3                 | 22.7%      | 15.1%      | 5.0%       | 2.2%           | 3.1%           | 0.0%           | 0.0%           | 3.1%           |
| tr F1SIX3 F1SIX3 |         | 7             | 3          | 2          | 1              | 1              | 0              | 0              | 1              | 9          | 21         | 7          | 1              | 1              | 0              | 0              | 1                 | 20.1%      | 8.3%       | 4.3%       | 3.5%           | 4.7%           | 0.0%           | 0.0%           | 4.7%           |
| tr I3L7E5 I3L7E5 |         | 16            | 4          | 0          | 0              | 1              | 0              | 0              | 0              | 20         | 10         | 0          | 0              | 2              | 0              | 0              | 0                 | 28.2%      | 4.5%       | 0.0%       | 0.0%           | 1.4%           | 0.0%           | 0.0%           | 0.0%           |
| tr F1RFU3 F1RFU3 |         | 11            | 5          | 1          | 0              | 2              | 0              | 0              | 0              | 19         | 11         | 1          | 0              | 2              | 0              | 0              | 0                 | 6.9%       | 2.5%       | 0.6%       | 0.0%           | 0.9%           | 0.0%           | 0.0%           | 0.0%           |
| tr F2Z562 F2Z562 |         | 7             | 3          | 0          | 0              | 1              | 0              | 0              | 4              | 10         | 5          | 0          | 0              | 1              | 0              | 0              | 7                 | 22.6%      | 11.1%      | 0.0%       | 0.0%           | 7.1%           | 0.0%           | 0.0%           | 22.2%          |
| tr F1SAE9 F1SAE9 |         | 5             | 1          | 2          | 0              | 1              | 0              | 0              | 2              | 7          | 8          | 4          | 0              | 1              | 0              | 0              | 5                 | 3.1%       | 0.6%       | 2.2%       | 0.0%           | 1.4%           | 0.0%           | 0.0%           | 2.8%           |
| tr K7GRA7 K7GRA7 |         | 8             | 2          | 0          | 0              | 1              | 0              | 0              | 0              | 11         | 4          | 0          | 0              | 1              | 0              | 0              | 0                 | 49.7%      | 19.1%      | 0.0%       | 0.0%           | 11.0%          | 0.0%           | 0.0%           | 0.0%           |
| tr F1SGZ8 F1SGZ8 |         | 6             | 2          | 7          | 0              | 1              | 0              | 2              | 4              | 11         | 4          | 184        | 0              | 1              | 0              | 2              | 8                 | 33.4%      | 10.9%      | 25.4%      | 0.0%           | 8.9%           | 0.0%           | 6.6%           | 14.9%          |
| tr I3LN23 I3LN23 |         | 2             | 4          | 1          | 0              | 0              | 1              | 0              | 0              | 8          | 7          | 5          | 0              | 0              | 1              | 0              | 0                 | 9.7%       | 20.3%      | 3.9%       | 0.0%           | 0.0%           | 6.3%           | 0.0%           | 0.0%           |
| tr I3LEB7 I3LEB7 |         | 4             | 1          | 2          | 0              | 1              | 0              | 0              | 0              | 5          | 10         | 11         | 0              | 1              | 0              | 0              | 0                 | 6.1%       | 1.4%       | 4.5%       | 0.0%           | 1.4%           | 0.0%           | 0.0%           | 0.0%           |
| tr F1S9Q3 F1S9Q3 |         | 63            | 35         | 36         | 4              | 13             | 4              | 12             | 22             | 370        | 202        | 886        | 6              | 26             | 6              | 307            | 257               | 58.9%      | 56.7%      | 42.8%      | 7.4%           | 32.1%          | 5.1%           | 18.0%          | 29.8%          |
| tr F1RFU5 F1RFU5 |         | 15            | 14         | 11         | 0              | 2              | 5              | 0              | 0              | 41         | 80         | 187        | 0              | 2              | 6              | 0              | 0                 | 63.3%      | 65.1%      | 41.4%      | 0.0%           | 16.7%          | 20.5%          | 0.0%           | 0.0%           |
| tr F1RYA4 F1RYA4 |         | 11            | 8          | 9          | 0              | 2              | 1              | 0              | 0              | 47         | 44         | 63         | 0              | 2              | 4              | 0              | 0                 | 29.6%      | 20.3%      | 27.5%      | 0.0%           | 2.9%           | 2.9%           | 0.0%           | 0.0%           |
| tr F1RJ93 F1RJ93 |         | 23            | 18         | 15         | 3              | 7              | 1              | 7              | 6              | 213        | 92         | 390        | 5              | 14             | 1              | 124            | 86                | 74.0%      | 71.6%      | 46.6%      | 21.6%          | 37.5%          | 5.3%           | 45.7%          | 38.9%          |
| tr F6PVJ7 F6PVJ7 |         | 12            | 5          | 7          | 1              | 1              | 0              | 3              | 5              | 38         | 23         | 31         | 2              | 2              | 0              | 116            | 57                | 61.2%      | 30.9%      | 37.5%      | 5.9%           | 5.9%           | 0.0%           | 17.1%          | 34.9%          |
| tr F1SQ01 F1SQ01 |         | 13            | 4          | 5          | 0              | 2              | 1              | 2              | 10             | 37         | 9          | 34         | 0              | 2              | 1              | 29             | 72                | 46.7%      | 22.4%      | 17.3%      | 0.0%           | 12.1%          | 4.4%           | 9.6%           | 51.1%          |
| tr F1RZT0 F1RZT0 |         | 8             | 4          | 0          | 1              | 1              | 0              | 1              | 4              | 28         | 18         | 0          | 1              | 2              | 0              | 9              | 20                | 27.6%      | 11.0%      | 0.0%       | 4.1%           | 4.1%           | 0.0%           | 4.1%           | 15.8%          |
| tr F1SGT2 F1SGT2 |         | 9             | 5          | 3          | 1              | 1              | 0              | 1              | 2              | 15         | 31         | 43         | 2              | 1              | 0              | 2              | 9                 | 41.7%      | 24.0%      | 18.6%      | 5.0%           | 5.0%           | 0.0%           | 5.8%           | 15.3%          |
| Q8HZV3           |         | 7             | 5          | 0          | 1              | 2              | 0              | 0              | 1              | 9          | 37         | 0          | 1              | 2              | 0              | 0              | 4                 | 9.9%       | 6.8%       | 0.0%       | 1.7%           | 2.9%           | 0.0%           | 0.0%           | 2.7%           |
| tr F1SAI8 F1SAI8 |         | 37            | 14         | 14         | 1              | 4              | 2              | 3              | 2              | 154        | 46         | 65         | 1              | 8              | 4              | 4              | 5                 | 39.0%      | 16.2%      | 21.8%      | 1.9%           | 5.4%           | 3.5%           | 5.3%           | 3.1%           |
| tr F1SKM9 F1SKM9 |         | 12            | 6          | 10         | 2              | 5              | 0              | 7              | 5              | 322        | 79         | 225        | 2              | 24             | 0              | 415            | 209               | 65.9%      | 60.0%      | 55.6%      | 25.2%          | 48.1%          | 0.0%           | 51.1%          | 31.9%          |
| tr F1SN05 F1SN05 |         | 5             | 3          | 8          | 1              | 1              | 0              | 1              | 3              | 11         | 20         | 19         | 1              | 1              | 0              | 3              | 5                 | 21.6%      | 13.6%      | 36.7%      | 4.9%           | 4.9%           | 0.0%           | 4.9%           | 13.6%          |
| tr F1RKW8 F1RKW8 |         | 13            | 6          | 3          | 0              | 1              | 1              | 1              | 0              | 24         | 7          | 16         | 0              | 1              | 1              | 7              | 0                 | 33.4%      | 10.7%      | 10.2%      | 0.0%           | 2.8%           | 3.1%           | 3.1%           | 0.0%           |
| tr F1RSM2 F1RSM2 |         | 5             | 3          | 4          | 0              | 1              | 1              |                |                |            |            |            |                |                |                |                |                   |            |            |            |                |                |                |                |                |

|                  | Sample# | Peptide Count |            |            |                |                |                |                | Spectral Count |            |            |            |                |                |                |                | Sequence Coverage |            |            |            |                |                |                |                |                |
|------------------|---------|---------------|------------|------------|----------------|----------------|----------------|----------------|----------------|------------|------------|------------|----------------|----------------|----------------|----------------|-------------------|------------|------------|------------|----------------|----------------|----------------|----------------|----------------|
|                  |         | Whole Cell    | Whole Cell | Whole Cell | Cilia Fraction | Whole Cell | Whole Cell | Whole Cell | Cilia Fraction    | Whole Cell | Whole Cell | Whole Cell | Cilia Fraction |
| Accession        |         | 1             | 2          | 6          | 4              | 3              | 5              | 7              | 8              | 1          | 2          | 6          | 4              | 3              | 5              | 7              | 8                 | 1          | 2          | 6          | 4              | 3              | 5              | 7              | 8              |
| tr K7GPB0 K7GPB0 |         | 5             | 4          | 2          | 1              | 1              | 1              | 0              | 0              | 19         | 46         | 13         | 2              | 1              | 1              | 0              | 0                 | 46.4%      | 20.8%      | 12.0%      | 7.7%           | 7.7%           | 7.7%           | 0.0%           | 0.0%           |
| tr F1SK86 F1SK86 |         | 19            | 7          | 8          | 0              | 3              | 2              | 1              | 9              | 55         | 43         | 41         | 0              | 3              | 3              | 1              | 33                | 43.4%      | 16.0%      | 18.6%      | 0.0%           | 5.9%           | 2.9%           | 3.9%           | 19.7%          |
| tr F1SN27 F1SN27 |         | 6             | 8          | 4          | 0              | 0              | 1              | 1              | 3              | 46         | 52         | 35         | 0              | 0              | 6              | 5              | 18                | 31.2%      | 27.2%      | 17.4%      | 0.0%           | 0.0%           | 5.1%           | 5.1%           | 11.8%          |
| tr F1RHH8 F1RHH8 |         | 17            | 5          | 2          | 1              | 1              | 0              | 2              | 0              | 27         | 22         | 22         | 1              | 2              | 0              | 3              | 0                 | 10.8%      | 2.4%       | 2.1%       | 0.6%           | 0.9%           | 0.0%           | 2.0%           | 0.0%           |
| tr F1SFQ4 F1SFQ4 |         | 11            | 8          | 7          | 0              | 4              | 0              | 3              | 2              | 41         | 41         | 73         | 0              | 5              | 0              | 3              | 7                 | 51.8%      | 30.3%      | 37.1%      | 0.0%           | 13.6%          | 0.0%           | 16.1%          | 19.0%          |
| tr F1RX79 F1RX79 |         | 2             | 2          | 0          | 0              | 1              | 1              | 0              | 0              | 8          | 74         | 0          | 0              | 1              | 4              | 0              | 0                 | 7.1%       | 7.1%       | 0.0%       | 0.0%           | 7.1%           | 7.1%           | 0.0%           | 0.0%           |
| tr F1RS60 F1RS60 |         | 2             | 2          | 0          | 0              | 1              | 1              | 0              | 0              | 8          | 74         | 0          | 0              | 1              | 4              | 0              | 0                 | 5.5%       | 5.5%       | 0.0%       | 0.0%           | 5.5%           | 5.5%           | 0.0%           | 0.0%           |
| tr F1RGK5 F1RGK5 |         | 25            | 4          | 29         | 2              | 1              | 0              | 4              | 11             | 60         | 6          | 295        | 3              | 1              | 0              | 63             | 105               | 55.2%      | 14.9%      | 56.9%      | 9.7%           | 4.0%           | 0.0%           | 15.7%          | 43.5%          |
| tr K7GQL0 K7GQL0 |         | 5             | 3          | 1          | 1              | 1              | 0              | 0              | 3              | 10         | 23         | 1          | 1              | 1              | 0              | 0              | 9                 | 29.7%      | 17.6%      | 7.7%       | 6.6%           | 6.6%           | 0.0%           | 0.0%           | 13.2%          |
| tr K7GQ55 K7GQ55 |         | 5             | 3          | 1          | 1              | 1              | 0              | 0              | 3              | 10         | 23         | 1          | 1              | 1              | 0              | 0              | 9                 | 19.0%      | 11.3%      | 4.9%       | 4.2%           | 4.2%           | 0.0%           | 0.0%           | 8.5%           |
| tr F1RRG9 F1RRG9 |         | 6             | 4          | 4          | 0              | 1              | 1              | 0              | 0              | 7          | 26         | 11         | 0              | 1              | 1              | 0              | 0                 | 7.0%       | 5.0%       | 7.6%       | 0.0%           | 0.9%           | 0.9%           | 0.0%           | 0.0%           |
| tr F1SDN2 F1SDN2 |         | 15            | 8          | 8          | 1              | 1              | 0              | 1              | 2              | 35         | 48         | 60         | 2              | 3              | 0              | 1              | 2                 | 41.3%      | 27.8%      | 22.5%      | 1.9%           | 1.9%           | 0.0%           | 5.7%           | 11.2%          |
| tr F1RFQ7 F1RFQ7 |         | 17            | 9          | 4          | 0              | 3              | 3              | 0              | 5              | 64         | 88         | 26         | 0              | 4              | 5              | 0              | 20                | 60.2%      | 30.1%      | 16.7%      | 0.0%           | 12.5%          | 12.0%          | 0.0%           | 17.6%          |
| tr D0G0C6 D0G0C6 |         | 21            | 7          | 7          | 0              | 3              | 0              | 3              | 4              | 49         | 19         | 57         | 0              | 4              | 0              | 13             | 4                 | 49.7%      | 13.0%      | 14.3%      | 0.0%           | 9.8%           | 0.0%           | 8.0%           | 11.2%          |
| tr F1RPX1 F1RPX1 |         | 10            | 5          | 4          | 0              | 1              | 1              | 0              | 1              | 18         | 33         | 14         | 0              | 1              | 2              | 0              | 1                 | 23.8%      | 8.8%       | 7.5%       | 0.0%           | 1.5%           | 1.9%           | 0.0%           | 1.9%           |
| tr F1RHU6 F1RHU6 |         | 10            | 3          | 7          | 0              | 1              | 0              | 3              | 5              | 27         | 7          | 39         | 0              | 2              | 0              | 15             | 22                | 32.9%      | 11.5%      | 21.1%      | 0.0%           | 5.1%           | 0.0%           | 13.2%          | 19.9%          |
| tr F1SLY7 F1SLY7 |         | 8             | 1          | 3          | 0              | 0              | 1              | 4              | 2              | 12         | 5          | 10         | 0              | 0              | 1              | 8              | 4                 | 44.5%      | 4.9%       | 24.2%      | 0.0%           | 0.0%           | 4.9%           | 26.4%          | 18.7%          |
| tr F1S519 F1S519 |         | 0             | 2          | 0          | 0              | 0              | 1              | 1              | 2              | 0          | 17         | 0          | 0              | 0              | 1              | 4              | 3                 | 0.0%       | 3.7%       | 0.0%       | 0.0%           | 0.0%           | 2.5%           | 2.5%           | 4.2%           |
| A1XQR9           |         | 2             | 1          | 0          | 0              | 1              | 0              | 1              | 0              | 15         | 2          | 0          | 0              | 1              | 0              | 3              | 0                 | 39.1%      | 12.0%      | 0.0%       | 0.0%           | 12.0%          | 0.0%           | 17.4%          | 0.0%           |
| tr I3LDW9 I3LDW9 |         | 2             | 1          | 0          | 0              | 1              | 0              | 1              | 0              | 15         | 2          | 0          | 0              | 1              | 0              | 3              | 0                 | 39.1%      | 12.0%      | 0.0%       | 0.0%           | 12.0%          | 0.0%           | 17.4%          | 0.0%           |
| tr A5D9J5 A5D9J5 |         | 4             | 3          | 2          | 1              | 0              | 0              | 1              | 1              | 7          | 10         | 11         | 1              | 0              | 0              | 1              | 4                 | 20.6%      | 18.7%      | 11.1%      | 6.0%           | 0.0%           | 0.0%           | 9.5%           | 4.8%           |
| tr A5D9J4 A5D9J4 |         | 4             | 3          | 2          | 1              | 0              | 0              | 1              | 1              | 7          | 10         | 11         | 1              | 0              | 0              | 1              | 4                 | 18.8%      | 17.0%      | 10.1%      | 5.4%           | 0.0%           | 0.0%           | 8.7%           | 4.3%           |
| tr A5D9J6 A5D9J6 |         | 4             | 3          | 2          | 1              | 0              | 0              | 1              | 1              | 7          | 10         | 11         | 1              | 0              | 0              | 1              | 4                 | 25.0%      | 22.6%      | 13.5%      | 7.2%           | 0.0%           | 0.0%           | 11.5%          | 5.8%           |
| tr I3LD63 I3LD63 |         | 6             | 3          | 2          | 1              | 0              | 0              | 1              | 0              | 8          | 9          | 14         | 1              | 0              | 0              | 3              | 0                 | 14.8%      | 8.0%       | 4.8%       | 2.4%           | 0.0%           | 0.0%           | 4.6%           | 0.0%           |
| tr F1SBY1 F1SBY1 |         | 1             | 1          | 0          | 0              | 1              | 0              | 0              | 0              | 1          | 16         | 0          | 0              | 1              | 0              | 0              | 0                 | 1.2%       | 1.2%       | 0.0%       | 0.0%           | 1.2%           | 0.0%           | 0.0%           | 0.0%           |
| tr K7GSN4 K7GSN4 |         | 5             | 2          | 0          | 0              | 0              | 1              | 0              | 0              | 15         | 2          | 0          | 0              | 0              | 1              | 0              | 0                 | 30.2%      | 23.3%      | 0.0%       | 0.0%           | 0.0%           | 10.7%          | 0.0%           | 0.0%           |
| tr F1S1R0 F1S1R0 |         | 1             | 1          | 0          | 0              | 1              | 0              | 0              | 0              | 1          | 16         | 0          | 0              | 1              | 0              | 0              | 0                 | 1.8%       | 1.3%       | 0.0%       | 0.0%           | 1.3%           | 0.0%           | 0.0%           | 0.0%           |
| tr I3L5T3 I3L5T3 |         | 3             | 2          | 4          | 0              | 1              | 0              | 0              | 1              | 13         | 4          | 19         | 0              | 1              | 0              | 0              | 1                 | 18.2%      | 8.5%       | 12.8%      | 0.0%           | 3.1%           | 0.0%           | 0.0%           | 3.1%           |
| tr F1S4H0 F1S4H0 |         | 8             | 1          | 5          | 0              | 1              | 0              | 0              | 1              | 14         | 3          | 58         | 0              | 1              | 0              | 0              | 3                 | 26.4%      | 1.7%       | 12.7%      | 0.0%           | 1.7%           | 0.0%           | 0.0%           | 4.7%           |
| tr F1SSR4 F1SSR4 |         | 7             | 4          | 6          | 0              | 1              | 0              | 0              | 1              | 11         | 6          | 53         | 0              | 1              | 0              | 0              | 2                 | 33.1%      | 16.4%      | 24.9%      | 0.0%           | 5.2%           | 0.0%           | 0.0%           | 4.7%           |
| tr I3LQ01 I3LQ01 |         | 5             | 0          | 4          | 0              | 0              | 1              | 0              | 0              | 17         | 0          | 8          | 0              | 0              | 1              | 0              | 0                 | 11.1%      | 0.0%       | 13.9%      | 0.0%           | 0.0%           | 2.0%           | 0.0%           | 0.0%           |
| tr I3LSM7 I3LSM7 |         | 10            | 2          | 14         | 0              | 1              | 0              | 0              | 0              | 14         | 3          | 61         | 0              | 1              | 0              | 0              | 0                 | 22.3%      | 4.5%       | 21.4%      | 0.0%           | 4.8%           | 0.0%           | 0.0%           | 0.0%           |
| tr I3LDM3 I3LDM3 |         | 21            | 11         | 3          | 0              | 3              | 3              | 0              | 1              | 54         | 66         | 9          | 0              | 4              | 3              | 0              | 1                 | 19.1%      | 15.2%      | 5.1%       | 0.0%           | 5.1%           | 3.0%           | 0.0%           | 2.0%           |
| tr F2Z5E6 F2Z5E6 |         | 9             | 8          | 4          | 1              | 1              | 2              | 3              | 3              | 39         | 64         | 14         | 3              | 2              | 1              | 7              | 13                | 37.7%      | 28.4%      | 23.0%      | 6.4%           | 6.4%           | 6.4%           | 13.7%          | 14.7%          |
| Q29308           |         | 9             | 5          | 4          | 1              | 2              | 0              | 1              | 7              | 34         | 35         | 21         | 1              | 3              | 0              | 13             | 96                | 37.5%      | 24.3%      | 21.3%      | 5.1%           | 12.5%          | 0.0%           | 8.1%           | 50.7%          |
| tr F1STM4 F1STM4 |         | 12            | 12         | 6          | 0              | 3              | 3              | 2              | 5              | 452        | 245        | 294        | 0              | 34             | 6              | 101            | 90                | 22.8%      | 20.2%      | 11.3%      | 0.0%           | 10.8%          | 9.5%           | 6.3%           | 12.6%          |
| tr F1STN7 F1STN7 |         | 13            | 12         | 6          | 0              | 3              | 3              | 2              | 5              | 453        | 245        | 294        | 0              | 34             | 6              | 101            | 90                | 26.5%      | 20.2%      | 11.3%      | 0.0%           | 10.8%          | 9.5%           | 6.3%           | 12.6%          |
| tr F1S6D8 F1S6D8 |         | 10            | 5          | 6          | 1              | 1              | 1              | 2              | 1              | 21         | 84         | 41         | 2              | 2              | 2              | 14             | 2                 | 34.9%      | 14.5%      | 32.6%      | 7.0%           | 7.0%           | 7.0%           | 14.5%          | 7.0%           |
| tr F1S8K5 F1S8K5 |         | 9             | 5          | 1          | 1              | 0              | 1              | 0              | 1              | 10         | 25         | 5          | 1              | 0              | 1              | 0              | 3                 | 11.0%      | 6.0%       | 1.6%       | 1.5%           | 0.0%           | 1.8%           | 0.0%           | 2.5%           |
| tr F1SG00 F1SG00 |         | 19            | 5          | 21         | 1              | 1              | 0              | 2              | 5              | 46         | 7          | 122        | 2              | 1              | 0              | 19             | 32                | 52.1%      | 12.3%      | 40.5%      | 3.5%           | 3.5%           | 0.0%           | 11.6%          | 31.3%          |
| tr F1SJR7 F1SJR7 |         | 29            | 10         | 9          | 2              | 3              | 1              | 1              | 8              | 75         | 67         | 31         | 2              | 5              | 1              | 3              | 21                | 59.4%      | 15.3%      | 16.9%      | 3.1%           | 5.1%           | 1.8%           | 1.8%           | 22.4%          |
| tr I3LCW1 I3LCW1 |         | 17            | 8          | 4          | 0              | 1              | 3              | 3              | 3              | 61         | 28         | 151        | 0              | 1              | 4              | 13             | 10                | 48.0%      | 23.1%      | 11.7%      | 0.0%           | 3.5%           | 0.0%           | 9.3%           | 9.4%           |
| tr I3LLD5 I3LLD5 |         | 33            | 20         | 16         | 1              | 9              | 0              | 6              | 8              | 147        | 405        | 103        | 2              | 29             | 0              | 104            | 82                | 72.3%      | 47.4%      | 31.2%      | 4.7%           | 28.2%          | 0.0%           | 23.7%          | 21.9%          |
| tr Q6QA25 Q6QA25 |         | 29            | 5          | 31         | 2              | 1              | 0              | 4              | 12             | 65         | 7          | 307        | 3              | 1              | 0              | 63             | 120               | 63.7%      | 19.0%      | 60.9%      | 9.7%           | 4.0%           | 0.0%           | 15.7%          | 48.0%          |
| tr I3LEX0 I3LEX0 |         | 8             | 12         | 7          | 0              | 1              | 2              | 0              | 3              | 23         | 49         | 20         | 0              | 1              | 3              | 0              | 8                 | 25.4%      | 43.0%      | 23.3%      | 0.0%           | 4.7%           | 11.4%          | 0.0%           | 14.0%          |
| Q9N0F1           |         | 7             | 8          | 6          | 0              | 0              | 2              | 0              | 0              | 36         | 18         | 29         | 0              | 0              | 3              | 0              | 0                 | 22.9%      | 22.0%      | 17.8%      | 0.0%           | 0.0%           | 8.8%           | 0.0%           | 0.0%           |
| tr F1S6V4 F1S6V4 |         | 12            | 6          | 4          | 0              | 2              | 0              | 1              | 3              | 17         | 19         | 25         | 0              | 0              | 1              | 0              | 15                | 19.8%      | 10.6%      | 6.3%       | 0.0%           | 2.2%           | 0.0%           | 1.7%           | 5.6%           |
| tr I3L813 I3L813 |         | 10            | 6          | 3          | 1              | 1              | 0              | 0              | 1              | 15         | 21         | 16         | 1              | 1              | 0              | 0              | 9                 | 50.2%      | 47.1%      | 16.9%      | 5.0%           | 5.0%           | 0.0%           | 0.0%           | 11.1%          |
| tr I3LGP0 I3LGP0 |         | 11            | 4          | 5          | 0              | 2              | 0              | 1              | 3              | 29         | 7          | 47         | 0              | 2              | 0              | 1              | 4                 | 24.8%      | 7.1%       | 11.1%      | 0.0%           | 3.1%           | 0.0%           | 1.9%           | 7.6%           |
| tr K7GLN4 K7GLN4 |         | 2             | 2          | 0          | 0              | 1              | 0              | 0              | 3              | 12         | 6          | 0          | 0              | 1              | 0              | 0              | 15                | 21.2%      | 19.0%      | 0.0%       | 0.0%           | 14.0%          | 0.0%           | 0.0%           | 21.2%          |
| tr F1SPF6 F1SPF6 |         | 7             | 3          | 1          | 0              | 1              | 0              | 1              | 5              | 10         | 8          | 6          | 0              | 1              | 0              | 9              | 10                | 20.1%      | 13.4%      | 6.3%       | 0.0%           | 5.2%           | 0.0%           | 5.2%           | 29.4%          |
| tr F1SBA5 F1SBA5 |         | 5             | 5          | 5          | 0              | 1              | 0              | 1              | 3              | 12         | 6          | 27         | 0              | 1              | 0              | 4              | 22                | 19.2%      | 24.8%      | 18.8%      | 0.0%           | 9.2%           | 0.0%           | 8.8%           | 9.2%           |
| tr I3LS28 I3LS28 |         | 1             | 4          | 3          | 0              | 1              | 0              | 0              | 2              | 4          | 14         | 12         | 0              | 1              | 0              | 0              | 11                | 2.9%       | 11.1%      | 14.2%      | 0.0%           | 3.2%           | 0.0%           | 0.0%           | 11.3%          |
| tr I3LHP2 I3LHP2 |         | 8             | 1          | 5          | 0              | 1              | 0              | 1              | 2              | 17         | 1          | 39         | 0              | 1              | 0              | 6              | 5                 | 38.4%      | 9.3%       | 24.6%      | 0.0%           | 9.3%           | 0.0%           | 6.4%           | 6.4%           |
| tr F1SDR6 F1SDR6 |         | 5             | 4          | 1          | 0              | 1              | 0              | 1              | 1              | 10         | 8          | 2          | 0              | 1              | 0              | 1              | 1                 | 6.1%       | 7.2%       | 2.8%       | 0.0%           | 1.5%           | 0.0%           | 1.8%           | 1.8%           |
| tr A5GFQ9 A5GFQ9 |         | 7             | 0          | 0          | 1              | 0              | 0              | 0              | 1              | 18         | 0          | 0          | 1              | 0              | 0              | 0              | 1                 | 14.5%      | 0.0%       | 0.0%       | 2.5%           | 0.0%           | 0.0%           | 0.0%           | 2.0%           |
| tr F1RYS5 F1RYS5 |         | 9             | 5          | 7          | 0              | 1              | 0              | 1              | 2              | 11         | 7          | 21         | 0              | 1              | 0              | 1              | 2                 | 25.4%      | 13.9%      | 22.2%      | 0.0%           | 4.6%           | 0.0%           | 3.2%           | 10.4%          |
| tr F1S429 F1S429 |         | 4             | 2          | 1          | 0              | 1              | 0              | 0              | 0              | 8          | 10         | 4          | 0              | 1              | 0              | 0              | 0                 | 8.1%       | 2.9%       | 3.1%       | 0.0%           | 1.4%           | 0.0%           | 0.0%           | 0.0%           |
| tr I3LB90 I3LB90 |         | 5             | 2          | 2          | 0              | 1              | 0              | 0              | 0              | 15         | 3          | 26         | 0              | 1              | 0              | 0              | 0                 | 24.7%      | 11.7%      | 18.7%      | 0.0%           | 3.7%           | 0.0%           | 0.0%           | 0.0%           |
| tr F1RSZ3 F1RSZ3 |         | 7             | 3          | 6          | 0              | 1              | 0              | 0              | 0              | 10         | 8          | 241        | 0              | 1              | 0              | 0              | 0                 | 14.2%      | 4.6%       | 7.7%       | 0.0%           | 2.6%           | 0.0%           | 0.0%           | 0.0%           |
| tr F1SB62 F1SB62 |         | 13            | 8          | 7          | 0              | 2              | 1              | 1              | 7              | 46         | 27         | 35         | 0              | 2              | 2              | 9              | 25                | 43.8%      | 32.0%      |            |                |                |                |                |                |

| Sample#            | Peptide Count |            |            |                |                |                |                | Spectral Count |            |            |                |                |                |                | Sequence Coverage |            |            |                |                |                |                |       |       |       |
|--------------------|---------------|------------|------------|----------------|----------------|----------------|----------------|----------------|------------|------------|----------------|----------------|----------------|----------------|-------------------|------------|------------|----------------|----------------|----------------|----------------|-------|-------|-------|
|                    | Whole Cell    | Whole Cell | Whole Cell | Cilia Fraction | Cilia Fraction | Cilia Fraction | Cilia Fraction | Whole Cell     | Whole Cell | Whole Cell | Cilia Fraction | Cilia Fraction | Cilia Fraction | Cilia Fraction | Whole Cell        | Whole Cell | Whole Cell | Cilia Fraction | Cilia Fraction | Cilia Fraction | Cilia Fraction |       |       |       |
|                    | 1             | 2          | 6          | 4              | 3              | 5              | 7              | 8              | 1          | 2          | 6              | 4              | 3              | 5              | 7                 | 8          | 1          | 2              | 6              | 4              | 3              | 5     | 7     | 8     |
| Accession          |               |            |            |                |                |                |                |                |            |            |                |                |                |                |                   |            |            |                |                |                |                |       |       |       |
| tr K7GP05 K7GP05   | 3             | 5          | 0          | 0              | 1              | 1              | 0              | 0              | 5          | 34         | 0              | 0              | 1              | 1              | 0                 | 0          | 18.6%      | 22.7%          | 0.0%           | 0.0%           | 7.3%           | 11.4% | 0.0%  | 0.0%  |
| tr F1S1Q7 F1S1Q7   | 3             | 5          | 2          | 0              | 1              | 1              | 0              | 0              | 5          | 34         | 7              | 0              | 1              | 1              | 0                 | 0          | 15.3%      | 18.7%          | 6.7%           | 0.0%           | 6.0%           | 9.3%  | 0.0%  | 0.0%  |
| tr K7GNC6 K7GNC6   | 3             | 5          | 2          | 0              | 1              | 1              | 0              | 0              | 5          | 34         | 7              | 0              | 1              | 1              | 0                 | 0          | 15.3%      | 18.7%          | 6.7%           | 0.0%           | 6.0%           | 9.3%  | 0.0%  | 0.0%  |
| tr I3LJW4 I3LJW4   | 46            | 25         | 20         | 1              | 6              | 4              | 6              | 11             | 178        | 222        | 167            | 1              | 13             | 6              | 219               | 42         | 52.3%      | 31.2%          | 28.7%          | 1.0%           | 10.2%          | 6.1%  | 12.4% | 17.6% |
| tr F1RQ06 F1RQ06   | 4             | 1          | 1          | 1              | 1              | 1              | 0              | 2              | 16         | 44         | 2              | 1              | 1              | 1              | 0                 | 10         | 30.0%      | 10.7%          | 10.7%          | 10.7%          | 10.7%          | 10.7% | 0.0%  | 20.0% |
| tr F1S1J34 F1S1J34 | 12            | 3          | 4          | 0              | 1              | 1              | 1              | 4              | 34         | 6          | 16             | 0              | 1              | 1              | 3                 | 35         | 56.6%      | 27.6%          | 27.0%          | 0.0%           | 11.2%          | 11.2% | 6.6%  | 30.9% |
| tr F2Z522 F2Z522   | 8             | 4          | 5          | 0              | 1              | 1              | 2              | 2              | 33         | 7          | 31             | 0              | 1              | 1              | 5                 | 7          | 50.0%      | 23.1%          | 30.1%          | 0.0%           | 8.3%           | 7.1%  | 16.0% | 7.7%  |
| tr F1SE82 F1SE82   | 0             | 2          | 0          | 1              | 0              | 1              | 0              | 0              | 0          | 40         | 0              | 1              | 0              | 1              | 0                 | 0          | 0.0%       | 8.4%           | 0.0%           | 8.4%           | 0.0%           | 8.4%  | 0.0%  | 0.0%  |
| BOKYV5             | 3             | 4          | 5          | 0              | 1              | 0              | 0              | 3              | 6          | 14         | 26             | 0              | 1              | 0              | 0                 | 13         | 5.6%       | 5.6%           | 12.3%          | 0.0%           | 1.6%           | 0.0%  | 0.0%  | 8.1%  |
| tr I3LI05 I3LI05   | 6             | 1          | 5          | 0              | 1              | 0              | 1              | 1              | 16         | 4          | 12             | 0              | 1              | 0              | 4                 | 4          | 11.3%      | 1.2%           | 7.4%           | 0.0%           | 3.0%           | 0.0%  | 1.4%  | 1.4%  |
| tr F1RHF0 F1RHF0   | 7             | 1          | 2          | 0              | 1              | 0              | 0              | 2              | 13         | 7          | 13             | 0              | 1              | 0              | 0                 | 3          | 49.5%      | 6.6%           | 9.4%           | 0.0%           | 6.6%           | 0.0%  | 0.0%  | 14.6% |
| tr I3LTE8 I3LTE8   | 9             | 1          | 2          | 0              | 1              | 0              | 0              | 1              | 14         | 6          | 7              | 0              | 1              | 0              | 0                 | 1          | 17.4%      | 1.3%           | 2.5%           | 0.0%           | 1.3%           | 0.0%  | 0.0%  | 1.3%  |
| tr I3LSY1 I3LSY1   | 3             | 2          | 0          | 0              | 1              | 0              | 0              | 0              | 6          | 14         | 0              | 0              | 1              | 0              | 0                 | 0          | 43.9%      | 17.1%          | 0.0%           | 0.0%           | 17.1%          | 0.0%  | 0.0%  | 0.0%  |
| Q95307             | 5             | 5          | 0          | 0              | 0              | 1              | 0              | 0              | 13         | 7          | 0              | 0              | 0              | 0              | 1                 | 0          | 19.0%      | 39.4%          | 0.0%           | 0.0%           | 0.0%           | 9.5%  | 0.0%  | 0.0%  |
| tr K7GQW4 K7GQW4   | 4             | 1          | 1          | 0              | 1              | 0              | 0              | 0              | 4          | 16         | 2              | 0              | 1              | 0              | 0                 | 0          | 6.9%       | 1.3%           | 1.8%           | 0.0%           | 1.3%           | 0.0%  | 0.0%  | 0.0%  |
| tr F1SQN4 F1SQN4   | 4             | 1          | 1          | 0              | 1              | 0              | 0              | 0              | 4          | 16         | 2              | 0              | 1              | 0              | 0                 | 0          | 6.9%       | 1.3%           | 1.8%           | 0.0%           | 1.3%           | 0.0%  | 0.0%  | 0.0%  |
| tr K7GLT8 K7GLT8   | 26            | 15         | 16         | 1              | 3              | 2              | 6              | 18             | 297        | 56         | 690            | 4              | 10             | 3              | 55                | 164        | 57.7%      | 42.1%          | 32.6%          | 2.8%           | 12.1%          | 6.3%  | 13.0% | 37.8% |
| tr I3LV18 I3LV18   | 12            | 11         | 5          | 0              | 1              | 2              | 0              | 4              | 29         | 34         | 29             | 0              | 1              | 2              | 0                 | 14         | 29.7%      | 29.3%          | 16.9%          | 0.0%           | 4.9%           | 5.3%  | 0.0%  | 19.2% |
| tr F1RFM7 F1RFM7   | 8             | 3          | 2          | 1              | 1              | 0              | 2              | 2              | 15         | 27         | 44             | 1              | 1              | 0              | 18                | 11         | 32.3%      | 8.5%           | 10.0%          | 2.5%           | 2.5%           | 0.0%  | 14.4% | 14.4% |
| tr F1S1U5 F1S1U5   | 4             | 4          | 3          | 1              | 1              | 0              | 0              | 2              | 16         | 26         | 21             | 1              | 1              | 0              | 0                 | 2          | 18.6%      | 10.8%          | 7.5%           | 4.6%           | 3.8%           | 0.0%  | 0.0%  | 8.2%  |
| tr F2Z505 F2Z505   | 9             | 7          | 2          | 1              | 1              | 0              | 0              | 0              | 17         | 25         | 4              | 1              | 1              | 0              | 0                 | 0          | 21.5%      | 25.4%          | 5.5%           | 3.0%           | 3.0%           | 0.0%  | 0.0%  | 0.0%  |
| tr I3L687 I3L687   | 5             | 2          | 3          | 0              | 1              | 0              | 2              | 2              | 15         | 6          | 25             | 0              | 1              | 0              | 147               | 63         | 12.8%      | 5.3%           | 7.6%           | 0.0%           | 2.3%           | 0.0%  | 8.0%  | 5.9%  |
| tr I3LJ18 I3LJ18   | 10            | 3          | 11         | 0              | 1              | 0              | 5              | 10             | 14         | 7          | 87             | 0              | 1              | 0              | 75                | 148        | 31.9%      | 16.7%          | 43.3%          | 0.0%           | 6.1%           | 0.0%  | 32.7% | 37.6% |
| tr I3LSM3 I3LSM3   | 11            | 1          | 4          | 0              | 1              | 0              | 2              | 5              | 20         | 1          | 17             | 0              | 1              | 0              | 6                 | 12         | 31.7%      | 1.7%           | 14.8%          | 0.0%           | 1.0%           | 0.0%  | 10.7% | 15.8% |
| tr F1SR76 F1SR76   | 9             | 2          | 6          | 1              | 0              | 0              | 0              | 4              | 17         | 4          | 20             | 1              | 0              | 0              | 0                 | 15         | 27.5%      | 5.7%           | 16.5%          | 2.3%           | 0.0%           | 0.0%  | 0.0%  | 12.5% |
| tr Q2PYM7 Q2PYM7   | 9             | 2          | 0          | 1              | 0              | 0              | 0              | 2              | 18         | 3          | 0              | 1              | 0              | 0              | 0                 | 5          | 62.1%      | 12.3%          | 0.0%           | 5.5%           | 0.0%           | 0.0%  | 0.0%  | 20.1% |
| tr F1SC24 F1SC24   | 11            | 2          | 0          | 0              | 1              | 0              | 0              | 0              | 17         | 4          | 0              | 0              | 1              | 0              | 0                 | 0          | 26.5%      | 5.4%           | 0.0%           | 0.0%           | 3.1%           | 0.0%  | 0.0%  | 0.0%  |
| tr F1SEQ3 F1SEQ3   | 3             | 3          | 0          | 0              | 1              | 0              | 0              | 0              | 5          | 16         | 0              | 0              | 1              | 0              | 0                 | 0          | 9.3%       | 9.0%           | 0.0%           | 0.0%           | 5.8%           | 0.0%  | 0.0%  | 0.0%  |
| tr F1S2X3 F1S2X3   | 3             | 2          | 1          | 0              | 1              | 0              | 0              | 0              | 7          | 14         | 2              | 0              | 1              | 0              | 0                 | 0          | 14.7%      | 8.8%           | 5.9%           | 0.0%           | 3.9%           | 0.0%  | 0.0%  | 0.0%  |
| tr F1SEN2 F1SEN2   | 38            | 26         | 23         | 1              | 2              | 5              | 3              | 10             | 176        | 100        | 349            | 4              | 2              | 7              | 39                | 42         | 62.0%      | 51.3%          | 36.2%          | 3.6%           | 3.8%           | 8.6%  | 7.5%  | 19.7% |
| tr I3LPZ8 I3LPZ8   | 4             | 2          | 1          | 1              | 1              | 0              | 0              | 0              | 109        | 19         | 24             | 2              | 4              | 0              | 0                 | 0          | 8.9%       | 8.9%           | 3.2%           | 3.2%           | 3.2%           | 0.0%  | 0.0%  | 0.0%  |
| tr F1RQC5 F1RQC5   | 15            | 8          | 3          | 0              | 2              | 0              | 2              | 1              | 23         | 41         | 5              | 0              | 3              | 0              | 3                 | 2          | 17.0%      | 5.7%           | 5.0%           | 0.0%           | 1.7%           | 0.0%  | 4.1%  | 2.0%  |
| tr F1S8L9 F1S8L9   | 46            | 16         | 21         | 1              | 5              | 2              | 7              | 15             | 137        | 164        | 250            | 3              | 9              | 2              | 131               | 104        | 47.3%      | 21.0%          | 26.5%          | 1.1%           | 6.0%           | 1.3%  | 15.3% | 27.5% |
| tr F1RGG1 F1RGG1   | 10            | 7          | 4          | 1              | 2              | 0              | 1              | 7              | 39         | 47         | 21             | 1              | 3              | 0              | 13                | 96         | 42.8%      | 31.0%          | 20.0%          | 4.8%           | 11.7%          | 0.0%  | 7.6%  | 47.6% |
| tr F1S593 F1S593   | 13            | 5          | 3          | 0              | 2              | 0              | 0              | 3              | 28         | 15         | 11             | 0              | 2              | 0              | 0                 | 8          | 18.7%      | 5.8%           | 9.0%           | 0.0%           | 1.9%           | 0.0%  | 0.0%  | 5.0%  |
| tr F1SLR5 F1SLR5   | 14            | 5          | 12         | 0              | 2              | 0              | 0              | 0              | 26         | 17         | 29             | 0              | 2              | 0              | 0                 | 0          | 10.5%      | 3.1%           | 10.5%          | 0.0%           | 1.6%           | 0.0%  | 0.0%  | 0.0%  |
| tr F1SUE3 F1SUE3   | 11            | 3          | 5          | 0              | 2              | 1              | 1              | 2              | 39         | 26         | 18             | 0              | 2              | 1              | 10                | 25         | 50.9%      | 10.4%          | 37.0%          | 0.0%           | 4.8%           | 4.8%  | 5.5%  | 10.0% |
| tr I3LFQ4 I3LFQ4   | 6             | 4          | 2          | 0              | 3              | 0              | 1              | 2              | 39         | 26         | 14             | 0              | 3              | 0              | 2                 | 4          | 32.9%      | 24.0%          | 18.6%          | 0.0%           | 24.0%          | 0.0%  | 5.4%  | 14.4% |
| tr F1RT96 F1RT96   | 16            | 5          | 17         | 1              | 2              | 0              | 0              | 3              | 48         | 17         | 180            | 1              | 2              | 0              | 0                 | 6          | 33.5%      | 12.8%          | 33.3%          | 1.8%           | 4.3%           | 0.0%  | 0.0%  | 7.4%  |
| tr F1SP32 F1SP32   | 9             | 5          | 4          | 1              | 2              | 1              | 4              | 7              | 37         | 50         | 16             | 1              | 2              | 1              | 25                | 24         | 33.6%      | 9.8%           | 11.0%          | 4.4%           | 7.1%           | 2.7%  | 21.8% | 33.1% |
| tr I3L893 I3L893   | 20            | 8          | 14         | 0              | 3              | 0              | 5              | 6              | 91         | 19         | 75             | 0              | 5              | 0              | 93                | 41         | 42.5%      | 26.0%          | 39.8%          | 0.0%           | 8.7%           | 0.0%  | 11.6% | 20.1% |
| tr Q2TJA5 Q2TJA5   | 10            | 3          | 5          | 0              | 1              | 0              | 1              | 3              | 19         | 3          | 20             | 0              | 1              | 0              | 1                 | 13         | 44.1%      | 10.2%          | 19.6%          | 0.0%           | 5.0%           | 0.0%  | 6.2%  | 10.6% |
| tr F1RRS3 F1RRS3   | 11            | 1          | 2          | 0              | 1              | 0              | 1              | 2              | 16         | 6          | 7              | 0              | 1              | 0              | 2                 | 3          | 23.3%      | 1.3%           | 2.5%           | 0.0%           | 1.3%           | 0.0%  | 4.3%  | 5.6%  |
| tr I3LSB8 I3LSB8   | 6             | 5          | 1          | 0              | 1              | 0              | 1              | 1              | 11         | 11         | 3              | 0              | 1              | 0              | 1                 | 2          | 3.7%       | 2.6%           | 0.8%           | 0.0%           | 0.6%           | 0.0%  | 0.6%  | 1.1%  |
| tr I3LDN4 I3LDN4   | 6             | 5          | 1          | 0              | 1              | 0              | 1              | 1              | 11         | 11         | 3              | 0              | 1              | 0              | 1                 | 2          | 3.6%       | 2.6%           | 0.8%           | 0.0%           | 0.6%           | 0.0%  | 0.6%  | 1.1%  |
| tr F1RQC1 F1RQC1   | 9             | 3          | 2          | 1              | 0              | 0              | 0              | 1              | 18         | 4          | 10             | 1              | 0              | 0              | 0                 | 3          | 22.2%      | 6.4%           | 8.2%           | 4.6%           | 0.0%           | 0.0%  | 0.0%  | 1.8%  |
| tr I3L703 I3L703   | 9             | 3          | 2          | 1              | 0              | 0              | 0              | 1              | 18         | 4          | 10             | 1              | 0              | 0              | 0                 | 3          | 22.0%      | 6.3%           | 8.1%           | 4.6%           | 0.0%           | 0.0%  | 0.0%  | 1.8%  |
| tr F1SVB0 F1SVB0   | 9             | 3          | 9          | 0              | 1              | 0              | 1              | 2              | 19         | 3          | 94             | 0              | 1              | 0              | 1                 | 8          | 38.4%      | 19.2%          | 26.9%          | 0.0%           | 8.0%           | 0.0%  | 8.0%  | 7.4%  |
| tr F2Z5Q8 F2Z5Q8   | 2             | 2          | 1          | 0              | 0              | 1              | 0              | 0              | 8          | 14         | 5              | 0              | 0              | 1              | 0                 | 0          | 20.0%      | 18.2%          | 9.1%           | 0.0%           | 0.0%           | 12.7% | 0.0%  | 0.0%  |
| tr I3LT97 I3LT97   | 1             | 2          | 1          | 0              | 0              | 1              | 0              | 0              | 2          | 20         | 12             | 0              | 0              | 1              | 0                 | 0          | 5.2%       | 9.9%           | 5.2%           | 0.0%           | 0.0%           | 4.7%  | 0.0%  | 0.0%  |
| tr I3LRY4 I3LRY4   | 10            | 3          | 3          | 0              | 1              | 0              | 0              | 0              | 14         | 8          | 14             | 0              | 1              | 0              | 0                 | 0          | 10.5%      | 2.6%           | 2.6%           | 0.0%           | 1.6%           | 0.0%  | 0.0%  | 0.0%  |
| tr F1SM00 F1SM00   | 10            | 3          | 3          | 0              | 1              | 0              | 0              | 0              | 14         | 8          | 14             | 0              | 1              | 0              | 0                 | 0          | 10.9%      | 2.7%           | 2.7%           | 0.0%           | 1.6%           | 0.0%  | 0.0%  | 0.0%  |
| tr F1SIQ0 F1SIQ0   | 1             | 1          | 5          | 0              | 1              | 0              | 0              | 0              | 1          | 21         | 29             | 0              | 1              | 0              | 0                 | 0          | 1.8%       | 1.5%           | 7.1%           | 0.0%           | 1.5%           | 0.0%  | 0.0%  | 0.0%  |
| P06348             | 7             | 3          | 3          | 0              | 1              | 0              | 0              | 0              | 17         | 5          | 43             | 0              | 1              | 0              | 0                 | 0          | 7.6%       | 7.6%           | 7.6%           | 0.0%           | 5.2%           | 0.0%  | 0.0%  | 0.0%  |
| tr F1RGP1 F1RGP1   | 51            | 20         | 14         | 2              | 3              | 1              | 3              | 0              | 169        | 118        | 64             | 5              | 6              | 2              | 11                | 0          | 41.2%      | 17.7%          | 14.9%          | 1.1%           | 3.8%           | 1.1%  | 2.9%  | 0.0%  |
| tr I3LNG8 I3LNG8   | 21            | 12         | 11         | 1              | 2              | 0              | 4              | 7              | 41         | 48         | 59             | 1              | 3              | 0              | 20                | 48         | 44.3%      | 25.1%          | 31.1%          | 2.2%           | 5.5%           | 0.0%  | 13.7% | 18.8% |
| Q6RI85             | 9             | 6          | 9          | 1              | 1              | 0              | 2              | 7              | 24         | 21         | 64             | 1              | 1              | 0              | 3                 | 23         | 19.9%      | 17.3%          | 15.6%          | 3.8%           | 3.8%           | 0.0%  | 7.7%  | 17.3% |
| tr I3LHE7 I3LHE7   | 11            | 5          | 0          | 0              | 0              | 2              | 0              | 1              | 19         | 26         | 0              | 0              | 0              | 2              | 0                 | 1          | 26.0%      | 6.8%           | 0.0%           | 0.0%           | 0.0%           | 3.9%  | 0.0%  | 3.7%  |
| tr I3LRU1 I3LRU1   | 11            | 5          | 0          | 0              | 0              | 2              | 0              | 1              | 19         | 26         | 0              | 0              | 0              | 2              | 0                 | 1          | 25.5%      | 6.7%           | 0.0%           | 0.0%           | 0.0%           | 3.8%  | 0.0%  | 3.7%  |
| tr I3LC73 I3LC73   | 33            | 24         | 16         | 0              | 4              | 1              | 4              | 14             | 88         | 71         | 75             | 0              | 5              | 2              | 27                | 49         | 39.1%      | 23.7%          | 18.0%          | 0.0%           | 5.5%           | 1.0%  | 7.9%  | 21.3% |
| tr F2Z5L7 F2Z5L7   | 9             | 4          | 6          | 0              | 0              | 2              | 0              | 4              | 14         | 32         | 47             | 0              | 0              | 2              | 0                 | 17         | 32.7%      | 14.8%          | 24.0%          | 0.0%           | 0.0%           | 4.6%  | 0.0%  | 14.4% |
| tr F1RY92 F1RY92   | 6             | 2          | 7          | 1              | 1              | 0              | 0              | 3              | 11         | 35         | 64             | 1              | 1              |                |                   |            |            |                |                |                |                |       |       |       |

| Sample#          | Peptide Count |            |            |                |                |                |                | Spectral Count |            |            |                |                |                |                | Sequence Coverage |            |            |                |                |                |                |       |       |       |       |
|------------------|---------------|------------|------------|----------------|----------------|----------------|----------------|----------------|------------|------------|----------------|----------------|----------------|----------------|-------------------|------------|------------|----------------|----------------|----------------|----------------|-------|-------|-------|-------|
|                  | Whole Cell    | Whole Cell | Whole Cell | Cilia Fraction | Cilia Fraction | Cilia Fraction | Cilia Fraction | Whole Cell     | Whole Cell | Whole Cell | Cilia Fraction | Cilia Fraction | Cilia Fraction | Cilia Fraction | Whole Cell        | Whole Cell | Whole Cell | Cilia Fraction | Cilia Fraction | Cilia Fraction | Cilia Fraction |       |       |       |       |
|                  | 1             | 2          | 6          | 4              | 3              | 5              | 7              | 8              | 1          | 2          | 6              | 4              | 3              | 5              | 7                 | 8          | 1          | 2              | 6              | 4              | 3              | 5     | 7     | 8     |       |
| Accession        |               |            |            |                |                |                |                |                |            |            |                |                |                |                |                   |            |            |                |                |                |                |       |       |       |       |
| tr F1RTH3 F1RTH3 | 6             | 2          | 6          | 1              | 0              | 0              | 0              | 0              | 10         | 14         | 21             | 1              | 0              | 0              | 0                 | 0          | 15.5%      | 5.9%           | 14.4%          | 2.6%           | 0.0%           | 0.0%  | 0.0%  | 0.0%  |       |
| tr K7GP58 K7GP58 | 6             | 2          | 6          | 1              | 0              | 0              | 0              | 0              | 10         | 14         | 21             | 1              | 0              | 0              | 0                 | 0          | 15.6%      | 5.9%           | 14.4%          | 2.6%           | 0.0%           | 0.0%  | 0.0%  | 0.0%  |       |
| tr F1S543 F1S543 | 11            | 12         | 2          | 0              | 2              | 1              | 1              | 1              | 32         | 41         | 20             | 0              | 2              | 1              | 23                | 5          | 47.7%      | 45.6%          | 9.1%           | 0.0%           | 12.5%          | 4.0%  | 6.1%  | 6.1%  |       |
| tr F1SVA0 F1SVA0 | 2             | 2          | 0          | 1              | 0              | 0              | 2              | 2              | 2          | 47         | 0              | 2              | 0              | 0              | 28                | 35         | 17.0%      | 5.5%           | 0.0%           | 5.5%           | 0.0%           | 0.0%  | 10.0% | 10.0% |       |
| tr F1RI15 F1RI15 | 41            | 17         | 22         | 0              | 3              | 1              | 3              | 7              | 85         | 40         | 296            | 0              | 4              | 1              | 3                 | 34         | 44.5%      | 20.7%          | 36.3%          | 0.0%           | 6.0%           | 1.9%  | 6.5%  | 14.8% |       |
| tr F1SBU7 F1SBU7 | 18            | 6          | 13         | 1              | 1              | 0              | 0              | 0              | 34         | 16         | 70             | 1              | 1              | 0              | 0                 | 0          | 27.3%      | 7.5%           | 11.4%          | 1.4%           | 1.4%           | 0.0%  | 0.0%  | 0.0%  |       |
| tr F1RRC0 F1RRC0 | 11            | 1          | 16         | 0              | 1              | 0              | 11             | 18             | 24         | 1          | 260            | 0              | 1              | 0              | 87                | 103        | 18.7%      | 1.5%           | 25.7%          | 0.0%           | 1.8%           | 0.0%  | 19.0% | 27.7% |       |
| tr I3LEZ7 I3LEZ7 | 9             | 4          | 0          | 0              | 0              | 1              | 2              | 3              | 18         | 7          | 0              | 0              | 0              | 1              | 4                 | 8          | 12.3%      | 4.2%           | 0.0%           | 0.0%           | 0.0%           | 2.1%  | 4.6%  | 4.6%  |       |
| tr I3LEQ7 I3LEQ7 | 8             | 3          | 4          | 0              | 1              | 0              | 1              | 2              | 11         | 14         | 23             | 0              | 1              | 0              | 1                 | 2          | 30.0%      | 11.4%          | 16.3%          | 0.0%           | 4.0%           | 0.0%  | 5.1%  | 12.0% |       |
| Q06AB3           | 8             | 2          | 3          | 0              | 1              | 0              | 0              | 2              | 16         | 9          | 23             | 0              | 1              | 0              | 0                 | 3          | 52.6%      | 13.0%          | 15.7%          | 0.0%           | 6.1%           | 0.0%  | 0.0%  | 13.5% |       |
| tr I3LNC4 I3LNC4 | 8             | 3          | 4          | 0              | 1              | 0              | 1              | 2              | 11         | 14         | 23             | 0              | 1              | 0              | 1                 | 2          | 28.9%      | 11.0%          | 15.7%          | 0.0%           | 3.9%           | 0.0%  | 5.0%  | 11.6% |       |
| tr I3L769 I3L769 | 5             | 2          | 0          | 0              | 0              | 1              | 0              | 1              | 18         | 7          | 0              | 0              | 0              | 1              | 0                 | 1          | 13.6%      | 2.2%           | 0.0%           | 0.0%           | 0.0%           | 3.5%  | 0.0%  | 2.0%  |       |
| tr F1SKL2 F1SKL2 | 1             | 3          | 3          | 0              | 0              | 1              | 0              | 1              | 1          | 24         | 9              | 0              | 0              | 0              | 1                 | 0          | 1          | 4.7%           | 12.5%          | 15.5%          | 0.0%           | 0.0%  | 4.4%  | 0.0%  | 14.5% |
| tr F2Z5M2 F2Z5M2 | 8             | 2          | 7          | 0              | 1              | 1              | 3              | 7              | 42         | 9          | 50             | 0              | 1              | 1              | 197               | 127        | 59.8%      | 27.8%          | 40.2%          | 0.0%           | 10.3%          | 10.3% | 27.8% | 40.2% |       |
| tr K7GMM3 K7GMM3 | 8             | 2          | 7          | 0              | 1              | 1              | 3              | 7              | 42         | 9          | 50             | 0              | 1              | 1              | 197               | 127        | 70.7%      | 32.9%          | 47.6%          | 0.0%           | 12.2%          | 12.2% | 32.9% | 47.6% |       |
| P04163           | 8             | 2          | 7          | 0              | 1              | 1              | 3              | 7              | 42         | 9          | 50             | 0              | 1              | 1              | 196               | 127        | 60.4%      | 28.1%          | 40.6%          | 0.0%           | 10.4%          | 10.4% | 28.1% | 40.6% |       |
| tr F1S0D9 F1S0D9 | 12            | 5          | 6          | 0              | 2              | 0              | 2              | 6              | 21         | 30         | 29             | 0              | 2              | 0              | 2                 | 25         | 21.8%      | 13.4%          | 15.6%          | 0.0%           | 5.8%           | 0.0%  | 7.4%  | 13.6% |       |
| tr F1SF78 F1SF78 | 10            | 4          | 3          | 1              | 1              | 0              | 0              | 0              | 37         | 14         | 5              | 1              | 1              | 0              | 0                 | 0          | 27.9%      | 8.0%           | 5.6%           | 2.4%           | 2.4%           | 0.0%  | 0.0%  | 0.0%  |       |
| tr I3LRP1 I3LRP1 | 15            | 3          | 11         | 0              | 1              | 0              | 1              | 3              | 62         | 15         | 19             | 0              | 3              | 0              | 5                 | 7          | 25.3%      | 4.9%           | 27.6%          | 0.0%           | 3.8%           | 0.0%  | 3.2%  | 6.5%  |       |
| tr K7GMY3 K7GMY3 | 2             | 1          | 2          | 1              | 1              | 0              | 1              | 0              | 2          | 127        | 10             | 3              | 1              | 1              | 0                 | 0          | 14.3%      | 16.7%          | 33.3%          | 16.7%          | 16.7%          | 0.0%  | 0.0%  | 0.0%  |       |
| tr F1RX64 F1RX64 | 4             | 1          | 0          | 0              | 0              | 1              | 1              | 4              | 19         | 7          | 0              | 0              | 0              | 1              | 14                | 14         | 20.9%      | 4.7%           | 0.0%           | 0.0%           | 0.0%           | 4.7%  | 9.8%  | 16.3% |       |
| tr F1SGJ3 F1SGJ3 | 13            | 3          | 9          | 1              | 0              | 0              | 6              | 15             | 22         | 4          | 84             | 1              | 0              | 0              | 44                | 60         | 26.9%      | 7.2%           | 17.5%          | 1.8%           | 0.0%           | 0.0%  | 19.7% | 34.4% |       |
| tr F1S409 F1S409 | 9             | 0          | 3          | 0              | 1              | 0              | 2              | 2              | 26         | 0          | 7              | 0              | 1              | 0              | 9                 | 3          | 15.2%      | 0.0%           | 8.4%           | 0.0%           | 3.0%           | 0.0%  | 5.5%  | 7.8%  |       |
| tr F1RGD9 F1RGD9 | 8             | 3          | 2          | 0              | 1              | 0              | 1              | 3              | 16         | 10         | 35             | 0              | 1              | 0              | 1                 | 6          | 26.1%      | 7.1%           | 5.7%           | 0.0%           | 2.8%           | 0.0%  | 2.8%  | 13.0% |       |
| tr F1RZ96 F1RZ96 | 3             | 4          | 0          | 0              | 1              | 0              | 0              | 0              | 8          | 18         | 0              | 0              | 1              | 0              | 0                 | 0          | 3.0%       | 5.0%           | 0.0%           | 0.0%           | 2.0%           | 0.0%  | 0.0%  | 0.0%  |       |
| tr F1S3A3 F1S3A3 | 1             | 1          | 0          | 0              | 1              | 0              | 0              | 0              | 6          | 20         | 0              | 0              | 1              | 0              | 0                 | 0          | 2.8%       | 2.8%           | 0.0%           | 0.0%           | 2.8%           | 0.0%  | 0.0%  | 0.0%  |       |
| tr F1SUQ8 F1SUQ8 | 8             | 5          | 2          | 0              | 1              | 0              | 0              | 0              | 9          | 17         | 7              | 0              | 1              | 0              | 0                 | 0          | 20.5%      | 15.3%          | 8.4%           | 0.0%           | 2.6%           | 0.0%  | 0.0%  | 0.0%  |       |
| tr K7GQI9 K7GQI9 | 3             | 2          | 3          | 1              | 1              | 0              | 0              | 0              | 3          | 128        | 15             | 3              | 1              | 1              | 0                 | 0          | 25.2%      | 27.1%          | 40.2%          | 13.1%          | 13.1%          | 13.1% | 0.0%  | 0.0%  |       |
| tr F1RYY5 F1RYY5 | 16            | 5          | 4          | 1              | 0              | 1              | 3              | 10             | 36         | 43         | 49             | 2              | 0              | 1              | 13                | 58         | 25.1%      | 7.9%           | 6.2%           | 2.0%           | 0.0%           | 1.1%  | 7.4%  | 15.6% |       |
| tr F1S764 F1S764 | 15            | 7          | 8          | 1              | 0              | 1              | 0              | 0              | 33         | 46         | 46             | 1              | 0              | 2              | 0                 | 0          | 27.4%      | 9.0%           | 11.9%          | 2.3%           | 0.0%           | 2.3%  | 0.0%  | 0.0%  |       |
| tr F1SDD5 F1SDD5 | 15            | 3          | 21         | 0              | 1              | 0              | 9              | 21             | 20         | 7          | 164            | 0              | 1              | 0              | 149               | 283        | 33.7%      | 8.5%           | 44.8%          | 0.0%           | 3.1%           | 0.0%  | 31.2% | 50.4% |       |
| tr F1S1A2 F1S1A2 | 1             | 2          | 0          | 0              | 1              | 0              | 1              | 1              | 3          | 24         | 0              | 0              | 1              | 0              | 2                 | 2          | 5.7%       | 5.7%           | 0.0%           | 0.0%           | 5.7%           | 0.0%  | 5.7%  | 5.7%  |       |
| tr F1S8D4 F1S8D4 | 8             | 2          | 0          | 0              | 1              | 0              | 0              | 1              | 20         | 7          | 0              | 0              | 1              | 0              | 0                 | 2          | 30.1%      | 6.1%           | 0.0%           | 0.0%           | 2.9%           | 0.0%  | 0.0%  | 4.4%  |       |
| A5GFZ5           | 6             | 2          | 0          | 0              | 0              | 1              | 1              | 0              | 12         | 15         | 0              | 0              | 1              | 0              | 1                 | 2          | 0          | 28.2%          | 9.7%           | 0.0%           | 0.0%           | 0.0%  | 8.5%  | 4.6%  | 0.0%  |
| tr I3LSY0 I3LSY0 | 7             | 2          | 0          | 0              | 0              | 1              | 0              | 1              | 20         | 7          | 0              | 0              | 0              | 1              | 0                 | 1          | 16.4%      | 2.3%           | 0.0%           | 0.0%           | 0.0%           | 3.6%  | 0.0%  | 2.1%  |       |
| tr F1SDN6 F1SDN6 | 4             | 6          | 3          | 0              | 1              | 0              | 0              | 1              | 10         | 17         | 7              | 0              | 1              | 0              | 0                 | 1          | 7.7%       | 11.1%          | 5.7%           | 0.0%           | 2.2%           | 0.0%  | 0.0%  | 4.0%  |       |
| tr F1STE8 F1STE8 | 27            | 9          | 2          | 0              | 4              | 0              | 0              | 6              | 79         | 58         | 12             | 0              | 5              | 0              | 0                 | 11         | 29.9%      | 8.9%           | 3.4%           | 0.0%           | 6.5%           | 0.0%  | 0.0%  | 7.5%  |       |
| tr I3L8K4 I3L8K4 | 27            | 9          | 2          | 0              | 4              | 0              | 0              | 6              | 79         | 58         | 12             | 0              | 5              | 0              | 0                 | 11         | 29.9%      | 8.9%           | 3.4%           | 0.0%           | 6.5%           | 0.0%  | 0.0%  | 7.5%  |       |
| tr I3LBT8 I3LBT8 | 4             | 2          | 3          | 1              | 0              | 0              | 2              | 2              | 10         | 18         | 42             | 1              | 0              | 0              | 15                | 14         | 22.9%      | 3.8%           | 12.1%          | 3.3%           | 0.0%           | 0.0%  | 8.8%  | 8.8%  |       |
| tr F1S891 F1S891 | 4             | 2          | 3          | 1              | 0              | 0              | 2              | 2              | 10         | 18         | 42             | 1              | 0              | 0              | 15                | 14         | 23.1%      | 3.8%           | 12.2%          | 3.4%           | 0.0%           | 0.0%  | 8.8%  | 8.8%  |       |
| tr F1SSG5 F1SSG5 | 7             | 6          | 1          | 0              | 0              | 1              | 1              | 0              | 19         | 9          | 1              | 0              | 0              | 1              | 1                 | 0          | 29.2%      | 12.5%          | 3.3%           | 0.0%           | 0.0%           | 5.0%  | 2.5%  | 0.0%  |       |
| tr F1RK74 F1RK74 | 7             | 3          | 1          | 1              | 0              | 0              | 0              | 1              | 23         | 5          | 4              | 1              | 0              | 0              | 0                 | 1          | 17.9%      | 8.8%           | 3.6%           | 2.6%           | 0.0%           | 0.0%  | 0.0%  | 3.9%  |       |
| tr F1RRD3 F1RRD3 | 9             | 6          | 6          | 0              | 0              | 1              | 0              | 1              | 20         | 8          | 15             | 0              | 0              | 1              | 0                 | 1          | 15.1%      | 10.4%          | 7.7%           | 0.0%           | 0.0%           | 3.2%  | 0.0%  | 3.2%  |       |
| A5A761           | 8             | 3          | 3          | 0              | 1              | 0              | 0              | 1              | 25         | 3          | 34             | 0              | 1              | 0              | 0                 | 1          | 33.2%      | 18.3%          | 13.0%          | 0.0%           | 10.6%          | 0.0%  | 0.0%  | 10.6% |       |
| Q29554           | 26            | 5          | 13         | 0              | 1              | 2              | 0              | 3              | 74         | 11         | 114            | 0              | 1              | 2              | 0                 | 5          | 47.1%      | 13.2%          | 20.3%          | 0.0%           | 3.4%           | 5.1%  | 0.0%  | 3.7%  |       |
| tr I3LLI8 I3LLI8 | 22            | 10         | 16         | 0              | 4              | 1              | 4              | 12             | 123        | 21         | 102            | 0              | 4              | 1              | 214               | 236        | 44.8%      | 46.1%          | 28.4%          | 0.0%           | 19.8%          | 8.2%  | 25.4% | 31.9% |       |
| tr F1S6R7 F1S6R7 | 18            | 13         | 10         | 1              | 2              | 1              | 1              | 8              | 127        | 133        | 61             | 1              | 4              | 4              | 17                | 43         | 47.0%      | 36.4%          | 26.0%          | 3.2%           | 3.2%           | 3.2%  | 4.1%  | 21.5% |       |
| tr K7GQY9 K7GQY9 | 4             | 2          | 3          | 1              | 1              | 0              | 4              | 1              | 49         | 9          | 26             | 1              | 1              | 0              | 59                | 101        | 41.5%      | 41.5%          | 41.5%          | 11.7%          | 11.7%          | 0.0%  | 38.3% | 38.3% |       |
| tr I3LUJ5 I3LUJ5 | 10            | 6          | 6          | 0              | 2              | 0              | 2              | 3              | 27         | 31         | 23             | 0              | 2              | 0              | 26                | 36         | 39.8%      | 28.5%          | 34.0%          | 0.0%           | 8.1%           | 0.0%  | 15.9% | 14.9% |       |
| A1E295           | 8             | 4          | 6          | 0              | 1              | 1              | 2              | 3              | 32         | 26         | 41             | 0              | 1              | 1              | 6                 | 20         | 34.6%      | 20.9%          | 22.1%          | 0.0%           | 3.3%           | 3.3%  | 14.3% | 10.7% |       |
| tr F1SLI3 F1SLI3 | 7             | 6          | 2          | 0              | 0              | 1              | 1              | 4              | 16         | 13         | 7              | 0              | 0              | 1              | 1                 | 24         | 7.4%       | 6.1%           | 4.0%           | 0.0%           | 0.0%           | 1.9%  | 2.1%  | 6.0%  |       |
| tr F1RSJ7 F1RSJ7 | 3             | 5          | 2          | 0              | 1              | 0              | 0              | 2              | 3          | 26         | 5              | 0              | 1              | 0              | 0                 | 5          | 3.0%       | 5.1%           | 4.1%           | 0.0%           | 1.3%           | 0.0%  | 0.0%  | 4.5%  |       |
| tr F2Z572 F2Z572 | 9             | 3          | 3          | 0              | 0              | 1              | 0              | 0              | 23         | 6          | 10             | 0              | 0              | 1              | 0                 | 0          | 32.7%      | 8.5%           | 11.0%          | 0.0%           | 0.0%           | 5.3%  | 0.0%  | 0.0%  |       |
| tr F1RT92 F1RT92 | 12            | 1          | 5          | 0              | 1              | 0              | 0              | 1              | 28         | 1          | 88             | 0              | 1              | 0              | 0                 | 1          | 43.6%      | 5.1%           | 24.6%          | 0.0%           | 5.1%           | 0.0%  | 0.0%  | 5.5%  |       |
| tr I3L9M7 I3L9M7 | 12            | 2          | 6          | 0              | 1              | 0              | 0              | 0              | 26         | 3          | 90             | 0              | 1              | 0              | 0                 | 0          | 32.4%      | 7.9%           | 21.3%          | 0.0%           | 3.5%           | 0.0%  | 0.0%  | 0.0%  |       |
| tr I3L995 I3L995 | 12            | 2          | 6          | 0              | 1              | 0              | 0              | 0              | 26         | 3          | 90             | 0              | 1              | 0              | 0                 | 0          | 36.4%      | 8.9%           | 23.9%          | 0.0%           | 3.9%           | 0.0%  | 0.0%  | 0.0%  |       |
| tr I3L9J4 I3L9J4 | 17            | 7          | 7          | 0              | 3              | 2              | 5              | 9              | 82         | 93         | 80             | 0              | 3              | 3              | 44                | 43         | 49.7%      | 37.9%          | 21.2%          | 0.0%           | 17.3%          | 7.7%  | 23.6% | 33.5% |       |
| P00889           | 18            | 10         | 3          | 1              | 3              | 3              | 1              | 1              | 89         | 271        | 22             | 2              | 3              | 7              | 5                 | 1          | 37.7%      | 26.3%          | 8.8%           | 2.6%           | 10.3%          | 9.9%  | 6.5%  | 6.5%  |       |
| tr Q53DY5 Q53DY5 | 12            | 9          | 5          | 0              | 2              | 1              | 0              | 1              | 32         | 88         | 69             | 0              | 2              | 2              | 0                 | 7          | 17.2%      | 27.6%          | 16.7%          | 0.0%           | 10.9%          | 5.9%  | 0.0%  | 5.9%  |       |
| tr I3LSI3 I3LSI3 | 13            | 6          | 5          | 0              | 2              | 0              | 2              | 8              | 49         | 11         | 22             | 0              | 2              | 0              | 6                 | 24         | 57.1%      | 30.4%          | 17.8%          | 0.0%           | 14.2%          | 0.0%  | 12.1% | 36.8% |       |
| tr F1S8Y2 F1S8Y2 | 15            | 8          | 0          | 0              | 2              | 0              | 2              | 3              | 29         | 31         | 0              | 0              | 0              | 2              | 0                 | 5          | 22.8%      | 8.9%           | 0.0%           | 0.0%           | 4.5%           | 0.0%  | 4.0%  | 6.5%  |       |
| tr F1S1F4 F1S1F4 | 5             | 3          | 0          | 0              | 0              | 1              | 1              | 1              | 14         | 16         |                |                |                |                |                   |            |            |                |                |                |                |       |       |       |       |

| Sample#          | Peptide Count |            |            |                |                |                |                | Spectral Count |            |            |                |                |                |                | Sequence Coverage |            |            |                |                |                |                |       |       |       |
|------------------|---------------|------------|------------|----------------|----------------|----------------|----------------|----------------|------------|------------|----------------|----------------|----------------|----------------|-------------------|------------|------------|----------------|----------------|----------------|----------------|-------|-------|-------|
|                  | Whole Cell    | Whole Cell | Whole Cell | Cilia Fraction | Cilia Fraction | Cilia Fraction | Cilia Fraction | Whole Cell     | Whole Cell | Whole Cell | Cilia Fraction | Cilia Fraction | Cilia Fraction | Cilia Fraction | Whole Cell        | Whole Cell | Whole Cell | Cilia Fraction | Cilia Fraction | Cilia Fraction | Cilia Fraction |       |       |       |
|                  | 1             | 2          | 6          | 4              | 3              | 5              | 7              | 8              | 1          | 2          | 6              | 4              | 3              | 5              | 7                 | 8          | 1          | 2              | 6              | 4              | 3              | 5     | 7     | 8     |
| Accession        |               |            |            |                |                |                |                |                |            |            |                |                |                |                |                   |            |            |                |                |                |                |       |       |       |
| tr F1SPF9 F1SPF9 | 23            | 5          | 6          | 0              | 1              | 1              | 5              | 2              | 53         | 10         | 25             | 0              | 1              | 1              | 25                | 3          | 59.5%      | 15.8%          | 13.9%          | 0.0%           | 2.4%           | 2.4%  | 23.3% | 9.2%  |
| tr I3LIM2 I3LIM2 | 18            | 7          | 3          | 0              | 2              | 0              | 0              | 4              | 32         | 31         | 13             | 0              | 2              | 0              | 0                 | 10         | 41.5%      | 14.0%          | 10.1%          | 0.0%           | 4.5%           | 0.0%  | 0.0%  | 18.0% |
| tr I3L918 I3L918 | 6             | 4          | 2          | 0              | 1              | 1              | 1              | 0              | 9          | 86         | 7              | 0              | 2              | 1              | 1                 | 0          | 40.8%      | 16.5%          | 13.1%          | 0.0%           | 5.8%           | 5.8%  | 5.8%  | 0.0%  |
| tr F2Z568 F2Z568 | 7             | 4          | 0          | 0              | 2              | 0              | 0              | 2              | 36         | 28         | 0              | 0              | 2              | 0              | 0                 | 20         | 35.7%      | 52.9%          | 0.0%           | 0.0%           | 18.6%          | 0.0%  | 0.0%  | 18.6% |
| tr F2Z4Y8 F2Z4Y8 | 10            | 4          | 5          | 0              | 1              | 0              | 1              | 2              | 24         | 8          | 35             | 0              | 1              | 0              | 16                | 22         | 44.3%      | 24.1%          | 35.4%          | 0.0%           | 6.3%           | 0.0%  | 11.4% | 18.4% |
| tr F1SKQ0 F1SKQ0 | 14            | 4          | 14         | 0              | 1              | 0              | 5              | 3              | 24         | 8          | 85             | 0              | 1              | 0              | 14                | 26         | 21.7%      | 6.0%           | 21.9%          | 0.0%           | 1.6%           | 0.0%  | 7.7%  | 4.3%  |
| tr I3LGH6 I3LGH6 | 7             | 5          | 3          | 1              | 0              | 0              | 2              | 1              | 21         | 11         | 16             | 1              | 0              | 0              | 7                 | 1          | 21.3%      | 12.1%          | 8.7%           | 2.4%           | 0.0%           | 0.0%  | 4.4%  | 3.7%  |
| tr F1RWJ6 F1RWJ6 | 12            | 5          | 12         | 0              | 1              | 0              | 0              | 5              | 24         | 8          | 59             | 0              | 1              | 0              | 0                 | 16         | 22.8%      | 7.7%           | 19.9%          | 0.0%           | 3.0%           | 0.0%  | 0.0%  | 15.9% |
| tr F1SGD1 F1SGD1 | 16            | 1          | 3          | 0              | 1              | 0              | 2              | 1              | 31         | 1          | 11             | 0              | 1              | 0              | 3                 | 2          | 37.3%      | 2.1%           | 6.9%           | 0.0%           | 2.3%           | 0.0%  | 6.1%  | 2.7%  |
| tr I3LR66 I3LR66 | 16            | 1          | 3          | 0              | 1              | 0              | 2              | 1              | 31         | 1          | 11             | 0              | 1              | 0              | 3                 | 2          | 36.7%      | 2.1%           | 6.8%           | 0.0%           | 2.2%           | 0.0%  | 6.0%  | 2.7%  |
| P60982           | 7             | 2          | 1          | 0              | 0              | 1              | 0              | 1              | 26         | 6          | 3              | 0              | 0              | 1              | 0                 | 2          | 24.8%      | 7.3%           | 6.7%           | 0.0%           | 0.0%           | 7.3%  | 0.0%  | 5.5%  |
| tr F2Z5I9 F2Z5I9 | 7             | 2          | 1          | 0              | 0              | 1              | 0              | 1              | 26         | 6          | 3              | 0              | 0              | 1              | 0                 | 2          | 25.0%      | 7.3%           | 6.7%           | 0.0%           | 0.0%           | 7.3%  | 0.0%  | 5.5%  |
| tr I3LLF6 I3LLF6 | 1             | 3          | 2          | 0              | 1              | 0              | 0              | 0              | 1          | 31         | 7              | 0              | 1              | 0              | 0                 | 0          | 6.2%       | 9.6%           | 6.9%           | 0.0%           | 6.2%           | 0.0%  | 0.0%  | 0.0%  |
| tr I3LG52 I3LG52 | 1             | 3          | 2          | 0              | 1              | 0              | 0              | 0              | 1          | 31         | 7              | 0              | 1              | 0              | 0                 | 0          | 5.9%       | 9.2%           | 6.6%           | 0.0%           | 5.9%           | 0.0%  | 0.0%  | 0.0%  |
| tr F1SA50 F1SA50 | 30            | 15         | 18         | 0              | 2              | 0              | 4              | 3              | 81         | 80         | 111            | 0              | 5              | 0              | 37                | 6          | 38.9%      | 22.6%          | 25.7%          | 0.0%           | 3.0%           | 0.0%  | 8.1%  | 7.0%  |
| tr F1RY66 F1RY66 | 13            | 7          | 8          | 1              | 3              | 0              | 2              | 2              | 47         | 114        | 77             | 1              | 4              | 0              | 7                 | 14         | 30.9%      | 19.0%          | 18.7%          | 3.3%           | 18.4%          | 0.0%  | 8.0%  | 14.8% |
| QZEN76           | 15            | 10         | 4          | 1              | 3              | 0              | 4              | 8              | 146        | 82         | 18             | 2              | 5              | 0              | 123               | 70         | 65.8%      | 61.2%          | 17.1%          | 5.9%           | 18.4%          | 0.0%  | 29.6% | 48.7% |
| tr F1SSL6 F1SSL6 | 7             | 5          | 3          | 0              | 0              | 1              | 0              | 2              | 17         | 16         | 23             | 0              | 0              | 1              | 0                 | 16         | 22.7%      | 19.2%          | 8.6%           | 0.0%           | 0.0%           | 3.5%  | 0.0%  | 10.2% |
| tr F1SA35 F1SA35 | 8             | 2          | 5          | 0              | 1              | 0              | 0              | 3              | 29         | 4          | 51             | 0              | 1              | 0              | 0                 | 10         | 15.8%      | 7.2%           | 8.6%           | 0.0%           | 2.9%           | 0.0%  | 0.0%  | 5.7%  |
| P04175           | 12            | 4          | 2          | 1              | 0              | 0              | 1              | 0              | 23         | 10         | 14             | 1              | 0              | 0              | 3                 | 0          | 18.3%      | 6.8%           | 3.2%           | 1.6%           | 0.0%           | 0.0%  | 3.1%  | 0.0%  |
| tr F1SLZ4 F1SLZ4 | 7             | 6          | 2          | 1              | 2              | 2              | 0              | 0              | 23         | 249        | 10             | 2              | 2              | 4              | 0                 | 0          | 35.2%      | 28.9%          | 14.5%          | 7.5%           | 15.7%          | 15.7% | 0.0%  | 0.0%  |
| tr I3LBB3 I3LBB3 | 7             | 6          | 2          | 1              | 2              | 2              | 0              | 0              | 23         | 249        | 10             | 2              | 2              | 4              | 0                 | 0          | 26.7%      | 21.9%          | 11.0%          | 5.7%           | 11.9%          | 11.9% | 0.0%  | 0.0%  |
| tr F1SNL7 F1SNL7 | 19            | 4          | 14         | 0              | 1              | 0              | 6              | 15             | 57         | 12         | 77             | 0              | 2              | 0              | 44                | 123        | 41.1%      | 20.0%          | 28.2%          | 0.0%           | 6.1%           | 0.0%  | 27.4% | 51.6% |
| tr K7GRY0 K7GRY0 | 42            | 18         | 18         | 0              | 6              | 1              | 13             | 18             | 175        | 103        | 127            | 0              | 7              | 1              | 98                | 71         | 44.5%      | 21.8%          | 19.8%          | 0.0%           | 10.5%          | 1.6%  | 21.8% | 26.2% |
| tr F1RWX8 F1RWX8 | 41            | 19         | 17         | 0              | 6              | 1              | 13             | 18             | 174        | 105        | 117            | 0              | 7              | 1              | 99                | 69         | 38.6%      | 22.0%          | 17.1%          | 0.0%           | 9.6%           | 1.5%  | 19.8% | 23.8% |
| tr I3LIC2 I3LIC2 | 46            | 11         | 21         | 0              | 4              | 2              | 1              | 1              | 129        | 116        | 142            | 0              | 4              | 3              | 6                 | 1          | 38.9%      | 11.7%          | 19.5%          | 0.0%           | 4.4%           | 1.9%  | 2.2%  | 1.5%  |
| tr F1SV90 F1SV90 | 8             | 6          | 4          | 0              | 1              | 0              | 3              | 3              | 23         | 12         | 19             | 0              | 1              | 0              | 13                | 3          | 37.8%      | 30.2%          | 17.5%          | 0.0%           | 7.4%           | 0.0%  | 13.5% | 20.3% |
| tr F1RU52 F1RU52 | 9             | 5          | 3          | 1              | 0              | 0              | 2              | 1              | 24         | 11         | 16             | 1              | 0              | 0              | 7                 | 1          | 25.9%      | 11.1%          | 8.0%           | 2.2%           | 0.0%           | 0.0%  | 4.1%  | 3.4%  |
| tr F1SSJ1 F1SSJ1 | 47            | 11         | 21         | 0              | 4              | 2              | 1              | 1              | 130        | 116        | 142            | 0              | 4              | 3              | 6                 | 1          | 39.8%      | 11.7%          | 19.5%          | 0.0%           | 4.5%           | 1.9%  | 2.2%  | 1.5%  |
| tr K7GLL2 K7GLL2 | 10            | 7          | 9          | 1              | 1              | 1              | 1              | 1              | 25         | 152        | 64             | 3              | 1              | 1              | 1                 | 1          | 48.8%      | 34.1%          | 40.1%          | 5.6%           | 5.6%           | 5.6%  | 9.1%  | 9.1%  |
| tr F1S956 F1S956 | 4             | 3          | 5          | 1              | 1              | 0              | 1              | 2              | 9          | 62         | 30             | 1              | 1              | 0              | 2                 | 2          | 23.7%      | 10.3%          | 22.1%          | 6.1%           | 6.1%           | 0.0%  | 6.1%  | 14.1% |
| tr F1SPY4 F1SPY4 | 9             | 3          | 4          | 0              | 0              | 1              | 1              | 4              | 16         | 20         | 13             | 0              | 0              | 1              | 1                 | 13         | 26.1%      | 9.7%           | 8.3%           | 0.0%           | 0.0%           | 1.9%  | 3.0%  | 12.5% |
| tr I3LUM9 I3LUM9 | 9             | 3          | 4          | 0              | 0              | 1              | 1              | 4              | 16         | 20         | 13             | 0              | 0              | 1              | 1                 | 13         | 26.1%      | 9.7%           | 8.3%           | 0.0%           | 0.0%           | 1.9%  | 3.0%  | 12.5% |
| tr F1SBF9 F1SBF9 | 9             | 4          | 7          | 1              | 0              | 0              | 0              | 3              | 20         | 16         | 22             | 1              | 0              | 0              | 0                 | 0          | 18.5%      | 5.2%           | 6.8%           | 1.7%           | 0.0%           | 0.0%  | 0.0%  | 7.6%  |
| tr K7GP28 K7GP28 | 13            | 7          | 9          | 1              | 1              | 1              | 1              | 1              | 29         | 152        | 64             | 3              | 1              | 1              | 1                 | 1          | 49.5%      | 29.4%          | 34.5%          | 4.8%           | 4.8%           | 4.8%  | 7.8%  | 7.8%  |
| tr F1RUI1 F1RUI1 | 13            | 7          | 9          | 1              | 1              | 1              | 1              | 1              | 29         | 152        | 64             | 3              | 1              | 1              | 1                 | 1          | 55.6%      | 33.0%          | 38.7%          | 5.4%           | 5.4%           | 5.4%  | 8.8%  | 8.8%  |
| tr I3LP37 I3LP37 | 28            | 5          | 4          | 0              | 2              | 0              | 1              | 5              | 57         | 16         | 17             | 0              | 2              | 0              | 1                 | 14         | 36.2%      | 7.8%           | 7.4%           | 0.0%           | 4.2%           | 0.0%  | 1.3%  | 8.8%  |
| tr I3LH11 I3LH11 | 28            | 5          | 4          | 0              | 2              | 0              | 1              | 5              | 57         | 16         | 17             | 0              | 2              | 0              | 1                 | 14         | 37.4%      | 8.1%           | 7.7%           | 0.0%           | 4.3%           | 0.0%  | 1.4%  | 8.6%  |
| tr F1SKN5 F1SKN5 | 10            | 3          | 6          | 0              | 1              | 0              | 1              | 1              | 15         | 22         | 40             | 0              | 1              | 0              | 1                 | 8          | 27.3%      | 4.1%           | 11.7%          | 0.0%           | 2.3%           | 0.0%  | 2.8%  | 2.1%  |
| P52552           | 6             | 5          | 4          | 0              | 1              | 0              | 0              | 0              | 27         | 10         | 56             | 0              | 1              | 0              | 0                 | 0          | 36.2%      | 37.0%          | 29.9%          | 0.0%           | 8.7%           | 0.0%  | 0.0%  | 0.0%  |
| tr K7GNI9 K7GNI9 | 22            | 10         | 9          | 1              | 2              | 0              | 2              | 12             | 76         | 36         | 72             | 1              | 2              | 0              | 9                 | 44         | 71.2%      | 42.0%          | 31.4%          | 7.1%           | 10.6%          | 0.0%  | 13.3% | 53.5% |
| tr F1SE00 F1SE00 | 8             | 6          | 6          | 0              | 1              | 0              | 1              | 0              | 26         | 12         | 36             | 0              | 1              | 0              | 5                 | 0          | 38.2%      | 20.8%          | 19.9%          | 0.0%           | 5.1%           | 0.0%  | 5.1%  | 0.0%  |
| Q4JHS0           | 10            | 3          | 1          | 0              | 0              | 1              | 0              | 0              | 24         | 14         | 2              | 0              | 0              | 1              | 0                 | 0          | 54.7%      | 15.6%          | 13.0%          | 0.0%           | 0.0%           | 9.9%  | 0.0%  | 0.0%  |
| tr F1SAC1 F1SAC1 | 12            | 4          | 3          | 0              | 2              | 0              | 3              | 3              | 73         | 44         | 11             | 0              | 3              | 0              | 18                | 11         | 46.7%      | 22.8%          | 8.0%           | 0.0%           | 14.5%          | 0.0%  | 15.9% | 14.5% |
| tr F1S814 F1S814 | 14            | 2          | 7          | 0              | 1              | 0              | 0              | 2              | 32         | 7          | 34             | 0              | 1              | 0              | 0                 | 4          | 40.6%      | 6.2%           | 12.5%          | 0.0%           | 4.4%           | 0.0%  | 0.0%  | 10.7% |
| tr F1RZRO F1RZRO | 14            | 7          | 4          | 0              | 1              | 0              | 0              | 0              | 23         | 16         | 17             | 0              | 1              | 0              | 0                 | 0          | 7.0%       | 2.4%           | 3.2%           | 0.0%           | 0.4%           | 0.0%  | 0.0%  | 0.0%  |
| tr F1SIH4 F1SIH4 | 32            | 18         | 10         | 0              | 3              | 1              | 10             | 8              | 101        | 95         | 62             | 0              | 3              | 2              | 81                | 26         | 40.7%      | 23.2%          | 16.6%          | 0.0%           | 7.1%           | 1.8%  | 18.1% | 17.4% |
| tr I3L9N6 I3L9N6 | 56            | 31         | 23         | 4              | 5              | 6              | 14             | 12             | 894        | 423        | 276            | 5              | 9              | 19             | 73                | 60         | 71.0%      | 56.0%          | 40.3%          | 7.9%           | 10.2%          | 7.9%  | 36.5% | 36.3% |
| tr K7GRJ0 K7GRJ0 | 23            | 11         | 11         | 1              | 2              | 0              | 3              | 13             | 82         | 38         | 82             | 1              | 2              | 0              | 10                | 45         | 75.2%      | 47.5%          | 38.7%          | 6.7%           | 10.1%          | 0.0%  | 20.2% | 58.4% |
| tr I3LMH4 I3LMH4 | 25            | 12         | 15         | 1              | 2              | 0              | 0              | 7              | 69         | 94         | 49             | 1              | 3              | 0              | 0                 | 16         | 19.2%      | 8.3%           | 12.9%          | 1.4%           | 2.3%           | 0.0%  | 0.0%  | 7.9%  |
| tr F1SGS6 F1SGS6 | 12            | 1          | 2          | 0              | 0              | 1              | 3              | 5              | 40         | 1          | 2              | 0              | 0              | 1              | 24                | 29         | 23.7%      | 1.6%           | 5.5%           | 0.0%           | 0.0%           | 4.2%  | 11.1% | 15.5% |
| tr I3L704 I3L704 | 5             | 7          | 1          | 0              | 1              | 0              | 2              | 4              | 13         | 28         | 3              | 0              | 1              | 0              | 20                | 11         | 20.8%      | 29.7%          | 5.8%           | 0.0%           | 6.7%           | 0.0%  | 13.7% | 18.8% |
| Q29384           | 6             | 4          | 2          | 1              | 0              | 0              | 2              | 2              | 14         | 27         | 19             | 1              | 0              | 0              | 10                | 14         | 55.2%      | 40.9%          | 14.3%          | 13.0%          | 0.0%           | 0.0%  | 27.3% | 27.3% |
| P37111           | 13            | 4          | 2          | 1              | 0              | 0              | 0              | 5              | 19         | 22         | 11             | 1              | 0              | 0              | 0                 | 19         | 42.5%      | 14.5%          | 7.1%           | 5.4%           | 0.0%           | 0.0%  | 0.0%  | 18.9% |
| tr F1SK12 F1SK12 | 38            | 11         | 35         | 0              | 1              | 2              | 2              | 9              | 60         | 64         | 212            | 0              | 1              | 2              | 3                 | 30         | 22.5%      | 4.8%           | 21.6%          | 0.0%           | 0.4%           | 1.2%  | 2.1%  | 8.5%  |
| P35750           | 8             | 2          | 2          | 0              | 1              | 0              | 0              | 4              | 15         | 27         | 7              | 0              | 1              | 0              | 0                 | 11         | 14.4%      | 2.9%           | 2.2%           | 0.0%           | 4.1%           | 0.0%  | 0.0%  | 12.9% |
| Q29558           | 15            | 4          | 2          | 1              | 0              | 0              | 2              | 5              | 36         | 6          | 21             | 1              | 0              | 0              | 3                 | 7          | 39.5%      | 10.6%          | 6.1%           | 5.0%           | 0.0%           | 0.0%  | 7.0%  | 14.2% |
| tr F1RQM4 F1RQM4 | 16            | 3          | 2          | 1              | 0              | 0              | 2              | 5              | 37         | 5          | 21             | 1              | 0              | 0              | 3                 | 7          | 42.7%      | 9.3%           | 6.0%           | 4.9%           | 0.0%           | 0.0%  | 6.9%  | 13.9% |
| tr F1SP46 F1SP46 | 3             | 5          | 1          | 0              | 1              | 0              | 1              | 3              | 9          | 34         | 29             | 0              | 1              | 0              | 1                 | 12         | 15.1%      | 23.3%          | 6.8%           | 0.0%           | 8.2%           | 0.0%  | 8.2%  | 16.4% |
| tr F2Z5V1 F2Z5V1 | 1             | 4          | 0          | 0              | 1              | 0              | 0              | 1              | 1          | 42         | 0              | 0              | 1              | 0              | 0                 | 4          | 20.3%      | 21.9%          | 0.0%           | 0.0%           | 15.6%          | 0.0%  | 0.0%  | 15.6% |
| tr F1SUG7 F1SUG7 | 22            | 11         | 4          | 0              | 2              | 0              | 0              | 0              | 46         | 41         | 14             | 0              | 2              | 0              | 0                 | 0          | 26.9%      | 14.0%          | 5.6%           | 0.0%           | 4.3%           | 0.0%  | 0.0%  | 0.0%  |
| tr K7GLK5 K7GLK5 | 3             | 8          | 2          | 0              | 1              | 0              | 1              | 0              | 1          | 6          | 38             | 45             | 0              | 1              | 0                 | 1          |            |                |                |                |                |       |       |       |

| Sample#          | Peptide Count |            |            |                |                |                |                | Spectral Count |            |            |                |                |                |                | Sequence Coverage |            |            |                |                |                |                |      |       |       |       |
|------------------|---------------|------------|------------|----------------|----------------|----------------|----------------|----------------|------------|------------|----------------|----------------|----------------|----------------|-------------------|------------|------------|----------------|----------------|----------------|----------------|------|-------|-------|-------|
|                  | Whole Cell    | Whole Cell | Whole Cell | Cilia Fraction | Cilia Fraction | Cilia Fraction | Cilia Fraction | Whole Cell     | Whole Cell | Whole Cell | Cilia Fraction | Cilia Fraction | Cilia Fraction | Cilia Fraction | Whole Cell        | Whole Cell | Whole Cell | Cilia Fraction | Cilia Fraction | Cilia Fraction | Cilia Fraction |      |       |       |       |
|                  | 1             | 2          | 6          | 4              | 3              | 5              | 7              | 8              | 1          | 2          | 6              | 4              | 3              | 5              | 7                 | 8          | 1          | 2              | 6              | 4              | 3              | 5    | 7     | 8     |       |
| Accession        |               |            |            |                |                |                |                |                |            |            |                |                |                |                |                   |            |            |                |                |                |                |      |       |       |       |
| tr F1ST02 F1ST02 | 8             | 5          | 3          | 1              | 0              | 0              | 3              | 3              | 21         | 32         | 28             | 1              | 0              | 0              | 32                | 16         | 45.1%      | 33.0%          | 14.0%          | 7.6%           | 0.0%           | 0.0% | 25.0% | 25.0% |       |
| tr I3LBH4 I3LBH4 | 3             | 2          | 0          | 0              | 1              | 0              | 1              | 2              | 30         | 24         | 0              | 0              | 1              | 0              | 2                 | 4          | 12.6%      | 4.7%           | 0.0%           | 0.0%           | 4.7%           | 0.0% | 4.7%  | 12.6% |       |
| tr F2Z5M3 F2Z5M3 | 18            | 10         | 11         | 0              | 3              | 1              | 3              | 15             | 217        | 56         | 123            | 0              | 4              | 1              | 21                | 75         | 66.2%      | 42.9%          | 22.7%          | 0.0%           | 23.4%          | 7.8% | 26.0% | 46.1% |       |
| tr F1SA66 F1SA66 | 8             | 7          | 1          | 0              | 0              | 1              | 0              | 0              | 14         | 45         | 4              | 0              | 0              | 1              | 0                 | 0          | 16.7%      | 11.2%          | 2.6%           | 0.0%           | 0.0%           | 3.5% | 0.0%  | 0.0%  |       |
| tr F1SQR8 F1SQR8 | 22            | 6          | 8          | 0              | 1              | 0              | 2              | 7              | 49         | 12         | 52             | 0              | 1              | 0              | 3                 | 31         | 44.7%      | 11.9%          | 17.2%          | 0.0%           | 4.9%           | 0.0% | 5.6%  | 15.7% |       |
| tr F1RQB6 F1RQB6 | 15            | 4          | 8          | 0              | 1              | 0              | 1              | 2              | 34         | 27         | 69             | 0              | 1              | 0              | 8                 | 3          | 32.1%      | 11.4%          | 19.8%          | 0.0%           | 2.2%           | 0.0% | 3.7%  | 8.2%  |       |
| tr F1SMW9 F1SMW9 | 11            | 5          | 6          | 0              | 1              | 0              | 1              | 0              | 38         | 23         | 23             | 0              | 1              | 0              | 2                 | 0          | 38.8%      | 10.4%          | 12.9%          | 0.0%           | 2.0%           | 0.0% | 4.2%  | 0.0%  |       |
| tr F1SGH5 F1SGH5 | 10            | 2          | 7          | 0              | 1              | 0              | 0              | 0              | 33         | 28         | 79             | 0              | 1              | 0              | 0                 | 0          | 35.8%      | 10.8%          | 24.2%          | 0.0%           | 4.4%           | 0.0% | 0.0%  | 0.0%  |       |
| tr F1S9K5 F1S9K5 | 50            | 15         | 32         | 0              | 2              | 1              | 6              | 16             | 149        | 96         | 170            | 0              | 3              | 1              | 79                | 94         | 36.1%      | 13.7%          | 21.7%          | 0.0%           | 2.7%           | 1.3% | 8.7%  | 19.0% |       |
| P00348           | 9             | 4          | 7          | 0              | 1              | 0              | 2              | 2              | 43         | 19         | 18             | 0              | 1              | 0              | 12                | 5          | 51.0%      | 18.2%          | 21.0%          | 0.0%           | 8.3%           | 0.0% | 16.6% | 17.2% |       |
| tr F1RLQ2 F1RLQ2 | 22            | 6          | 28         | 0              | 1              | 0              | 6              | 3              | 48         | 15         | 169            | 0              | 1              | 0              | 61                | 47         | 36.3%      | 9.6%           | 43.4%          | 0.0%           | 2.3%           | 0.0% | 10.5% | 7.2%  |       |
| Q3ZD69           | 22            | 6          | 29         | 0              | 1              | 0              | 6              | 3              | 48         | 15         | 172            | 0              | 1              | 0              | 61                | 47         | 36.3%      | 9.6%           | 44.7%          | 0.0%           | 2.3%           | 0.0% | 10.5% | 7.2%  |       |
| tr F1SS26 F1SS26 | 14            | 4          | 9          | 0              | 1              | 0              | 0              | 0              | 23         | 40         | 48             | 0              | 1              | 0              | 0                 | 10         | 16.6%      | 3.6%           | 9.4%           | 0.0%           | 0.8%           | 0.0% | 0.0%  | 5.1%  |       |
| tr F1SKI5 F1SKI5 | 22            | 6          | 8          | 0              | 1              | 0              | 3              | 8              | 51         | 13         | 23             | 0              | 1              | 0              | 19                | 28         | 45.7%      | 23.0%          | 17.1%          | 0.0%           | 5.3%           | 0.0% | 8.9%  | 28.2% |       |
| P62831           | 7             | 6          | 3          | 1              | 0              | 0              | 2              | 6              | 42         | 25         | 53             | 1              | 0              | 0              | 28                | 16         | 45.0%      | 40.7%          | 30.7%          | 14.3%          | 0.0%           | 0.0% | 25.0% | 19.3% |       |
| tr I3LRH2 I3LRH2 | 34            | 26         | 17         | 2              | 3              | 0              | 8              | 11             | 225        | 144        | 132            | 2              | 3              | 0              | 50                | 34         | 34.0%      | 29.3%          | 23.1%          | 2.9%           | 5.9%           | 0.0% | 14.9% | 18.4% |       |
| tr I3LCC2 I3LCC2 | 14            | 3          | 1          | 1              | 1              | 0              | 2              | 3              | 32         | 120        | 1              | 1              | 1              | 0              | 5                 | 3          | 26.5%      | 4.7%           | 1.6%           | 1.2%           | 2.6%           | 0.0% | 5.4%  | 8.7%  |       |
| tr D0G6X4 D0G6X4 | 13            | 5          | 5          | 0              | 0              | 1              | 1              | 2              | 35         | 43         | 17             | 0              | 0              | 1              | 5                 | 8          | 25.2%      | 23.3%          | 7.6%           | 0.0%           | 0.0%           | 5.5% | 4.3%  | 7.6%  |       |
| tr F1RGJ3 F1RGJ3 | 34            | 16         | 28         | 1              | 0              | 1              | 2              | 2              | 90         | 67         | 173            | 1              | 0              | 1              | 2                 | 2          | 43.3%      | 27.5%          | 32.7%          | 2.1%           | 0.0%           | 2.1% | 5.7%  | 5.2%  |       |
| tr F1S8T1 F1S8T1 | 5             | 9          | 2          | 0              | 1              | 0              | 0              | 0              | 18         | 66         | 6              | 0              | 1              | 0              | 0                 | 0          | 8.8%       | 10.0%          | 3.5%           | 0.0%           | 3.4%           | 0.0% | 0.0%  | 0.0%  |       |
| P46405           | 11            | 8          | 6          | 0              | 0              | 1              | 2              | 3              | 37         | 50         | 63             | 0              | 0              | 1              | 26                | 24         | 58.3%      | 48.5%          | 39.4%          | 0.0%           | 0.0%           | 8.3% | 18.9% | 26.5% |       |
| tr Q06A94 Q06A94 | 32            | 12         | 7          | 0              | 1              | 1              | 4              | 11             | 190        | 76         | 44             | 0              | 2              | 1              | 86                | 42         | 58.8%      | 36.6%          | 29.4%          | 0.0%           | 5.0%           | 5.3% | 20.9% | 38.1% |       |
| tr F1SXJ1 F1SXJ1 | 20            | 5          | 8          | 0              | 0              | 0              | 2              | 0              | 71         | 18         | 45             | 0              | 1              | 0              | 0                 | 5          | 57.7%      | 28.5%          | 26.1%          | 0.0%           | 8.1%           | 0.0% | 0.0%  | 13.8% |       |
| tr F1SQS2 F1SQS2 | 9             | 4          | 4          | 0              | 1              | 0              | 0              | 1              | 25         | 74         | 8              | 0              | 1              | 0              | 0                 | 1          | 56.8%      | 14.2%          | 32.6%          | 0.0%           | 7.4%           | 0.0% | 0.0%  | 13.7% |       |
| tr F1RGI7 F1RGI7 | 22            | 8          | 15         | 0              | 1              | 0              | 1              | 1              | 66         | 37         | 76             | 0              | 1              | 0              | 1                 | 1          | 34.6%      | 9.8%           | 17.9%          | 0.0%           | 2.9%           | 0.0% | 2.1%  | 2.1%  |       |
| tr F1SDX9 F1SDX9 | 9             | 6          | 4          | 0              | 1              | 0              | 0              | 5              | 99         | 17         | 56             | 0              | 1              | 0              | 0                 | 16         | 58.1%      | 38.9%          | 19.2%          | 0.0%           | 5.6%           | 0.0% | 0.0%  | 34.8% |       |
| tr I3LA63 I3LA63 | 3             | 1          | 0          | 1              | 0              | 0              | 0              | 0              | 5          | 115        | 0              | 1              | 0              | 0              | 0                 | 0          | 10.6%      | 3.8%           | 0.0%           | 3.8%           | 0.0%           | 0.0% | 0.0%  | 0.0%  |       |
| tr F1SMV6 F1SMV6 | 25            | 11         | 12         | 0              | 1              | 0              | 7              | 10             | 185        | 42         | 58             | 0              | 1              | 0              | 45                | 28         | 51.2%      | 39.7%          | 24.9%          | 0.0%           | 6.0%           | 0.0% | 23.8% | 30.1% |       |
| tr I3LTH8 I3LTH8 | 19            | 14         | 19         | 0              | 1              | 0              | 4              | 6              | 259        | 70         | 113            | 0              | 1              | 0              | 140               | 49         | 54.4%      | 38.9%          | 48.1%          | 0.0%           | 7.4%           | 0.0% | 17.0% | 29.7% |       |
| tr F1RRY2 F1RRY2 | 19            | 14         | 19         | 0              | 1              | 0              | 4              | 6              | 259        | 70         | 113            | 0              | 1              | 0              | 140               | 49         | 52.4%      | 37.4%          | 46.3%          | 0.0%           | 7.1%           | 0.0% | 16.3% | 28.6% |       |
| tr I3LUP6 I3LUP6 | 19            | 14         | 20         | 0              | 1              | 0              | 4              | 6              | 259        | 70         | 115            | 0              | 1              | 0              | 140               | 49         | 50.5%      | 36.1%          | 45.2%          | 0.0%           | 6.9%           | 0.0% | 15.7% | 27.5% |       |
| P11708           | 15            | 10         | 7          | 0              | 0              | 0              | 1              | 6              | 60         | 93         | 121            | 0              | 0              | 0              | 5                 | 37         | 45.5%      | 34.1%          | 28.4%          | 0.0%           | 0.0%           | 0.0% | 4.5%  | 18.0% |       |
| tr F1S827 F1S827 | 18            | 18         | 5          | 0              | 0              | 0              | 0              | 0              | 1          | 54         | 97             | 14             | 0              | 0              | 0                 | 0          | 1          | 35.4%          | 36.9%          | 22.1%          | 0.0%           | 0.0% | 0.0%  | 3.7%  |       |
| Q29099           | 16            | 11         | 10         | 0              | 0              | 0              | 1              | 8              | 113        | 29         | 61             | 0              | 0              | 0              | 17                | 43         | 43.8%      | 33.2%          | 26.0%          | 0.0%           | 0.0%           | 0.0% | 4.1%  | 21.5% |       |
| tr F1SIU9 F1SIU9 | 15            | 8          | 5          | 0              | 0              | 0              | 5              | 11             | 79         | 27         | 49             | 0              | 0              | 0              | 13                | 79         | 48.9%      | 27.0%          | 18.0%          | 0.0%           | 0.0%           | 0.0% | 22.8% | 43.9% |       |
| P16276           | 30            | 8          | 23         | 0              | 0              | 0              | 1              | 2              | 70         | 21         | 579            | 0              | 0              | 0              | 2                 | 4          | 43.5%      | 14.6%          | 27.3%          | 0.0%           | 0.0%           | 0.0% | 2.8%  | 4.7%  |       |
| tr F1SRC5 F1SRC5 | 30            | 8          | 24         | 0              | 0              | 0              | 1              | 2              | 70         | 21         | 589            | 0              | 0              | 0              | 2                 | 4          | 44.2%      | 14.8%          | 28.7%          | 0.0%           | 0.0%           | 0.0% | 2.9%  | 4.8%  |       |
| tr F2Z546 F2Z546 | 1             | 6          | 4          | 0              | 0              | 0              | 0              | 0              | 2          | 84         | 27             | 0              | 0              | 0              | 0                 | 0          | 8.7%       | 26.5%          | 14.3%          | 0.0%           | 0.0%           | 0.0% | 0.0%  | 0.0%  |       |
| tr I3LBY9 I3LBY9 | 13            | 8          | 7          | 0              | 0              | 0              | 1              | 6              | 52         | 33         | 122            | 0              | 0              | 0              | 5                 | 37         | 46.5%      | 32.5%          | 35.1%          | 0.0%           | 0.0%           | 0.0% | 5.5%  | 22.1% |       |
| tr I3LSG1 I3LSG1 | 13            | 6          | 4          | 0              | 0              | 0              | 0              | 0              | 28         | 57         | 10             | 0              | 0              | 0              | 0                 | 0          | 16.6%      | 6.2%           | 5.2%           | 0.0%           | 0.0%           | 0.0% | 0.0%  | 0.0%  |       |
| tr I3LPB7 I3LPB7 | 13            | 6          | 4          | 0              | 0              | 0              | 0              | 0              | 28         | 57         | 10             | 0              | 0              | 0              | 0                 | 0          | 16.3%      | 6.1%           | 5.1%           | 0.0%           | 0.0%           | 0.0% | 0.0%  | 0.0%  |       |
| tr F1RJL2 F1RJL2 | 13            | 6          | 4          | 0              | 0              | 0              | 0              | 0              | 28         | 57         | 10             | 0              | 0              | 0              | 0                 | 0          | 16.3%      | 6.1%           | 5.1%           | 0.0%           | 0.0%           | 0.0% | 0.0%  | 0.0%  |       |
| tr I3LDH3 I3LDH3 | 22            | 7          | 13         | 0              | 0              | 0              | 1              | 1              | 39         | 45         | 59             | 0              | 0              | 0              | 1                 | 1          | 29.0%      | 8.6%           | 14.8%          | 0.0%           | 0.0%           | 0.0% | 1.3%  | 1.4%  |       |
| tr F1SIX1 F1SIX1 | 3             | 4          | 1          | 0              | 0              | 0              | 0              | 0              | 9          | 70         | 2              | 0              | 0              | 0              | 0                 | 0          | 22.7%      | 23.9%          | 6.7%           | 0.0%           | 0.0%           | 0.0% | 0.0%  | 0.0%  |       |
| tr F1SHD6 F1SHD6 | 15            | 3          | 2          | 0              | 0              | 0              | 2              | 3              | 49         | 29         | 8              | 0              | 0              | 0              | 10                | 29         | 60.9%      | 15.6%          | 12.4%          | 0.0%           | 0.0%           | 0.0% | 26.7% | 31.6% |       |
| tr I3LPP1 I3LPP1 | 12            | 5          | 10         | 0              | 0              | 0              | 1              | 3              | 68         | 10         | 105            | 0              | 0              | 0              | 5                 | 13         | 37.8%      | 15.9%          | 23.6%          | 0.0%           | 0.0%           | 0.0% | 4.5%  | 15.0% |       |
| tr I3L6Q5 I3L6Q5 | 7             | 6          | 4          | 0              | 0              | 0              | 0              | 0              | 1          | 20         | 58             | 30             | 0              | 0              | 0                 | 0          | 3          | 18.7%          | 17.2%          | 13.8%          | 0.0%           | 0.0% | 0.0%  | 6.4%  |       |
| tr F1RMZ8 F1RMZ8 | 19            | 2          | 5          | 0              | 0              | 0              | 0              | 12             | 19         | 70         | 2              | 23             | 0              | 0              | 0                 | 47         | 69         | 39.9%          | 6.3%           | 11.7%          | 0.0%           | 0.0% | 0.0%  | 37.8% | 47.6% |
| tr F1SEV8 F1SEV8 | 12            | 7          | 9          | 0              | 0              | 0              | 6              | 6              | 34         | 36         | 26             | 0              | 0              | 0              | 142               | 61         | 22.4%      | 15.9%          | 10.0%          | 0.0%           | 0.0%           | 0.0% | 16.2% | 11.8% |       |
| P61288           | 10            | 7          | 2          | 0              | 0              | 0              | 2              | 5              | 30         | 40         | 6              | 0              | 0              | 0              | 5                 | 36         | 61.0%      | 52.9%          | 27.9%          | 0.0%           | 0.0%           | 0.0% | 8.7%  | 47.7% |       |
| Q710C4           | 19            | 10         | 15         | 0              | 0              | 0              | 3              | 7              | 41         | 29         | 110            | 0              | 0              | 0              | 15                | 47         | 38.7%      | 23.1%          | 31.0%          | 0.0%           | 0.0%           | 0.0% | 10.9% | 24.1% |       |
| tr I3LT08 I3LT08 | 11            | 7          | 9          | 0              | 0              | 0              | 6              | 6              | 33         | 36         | 26             | 0              | 0              | 0              | 142               | 61         | 17.9%      | 15.7%          | 9.9%           | 0.0%           | 0.0%           | 0.0% | 16.0% | 11.7% |       |
| tr F1S4Y7 F1S4Y7 | 18            | 9          | 14         | 0              | 0              | 0              | 3              | 7              | 40         | 26         | 104            | 0              | 0              | 0              | 15                | 47         | 36.9%      | 21.0%          | 29.1%          | 0.0%           | 0.0%           | 0.0% | 11.1% | 24.6% |       |
| tr Q2VTP6 Q2VTP6 | 7             | 3          | 1          | 0              | 0              | 0              | 1              | 3              | 44         | 20         | 25             | 0              | 0              | 0              | 1                 | 6          | 77.8%      | 29.6%          | 13.0%          | 0.0%           | 0.0%           | 0.0% | 13.0% | 45.4% |       |
| P10173           | 11            | 5          | 9          | 0              | 0              | 0              | 0              | 2              | 53         | 10         | 81             | 0              | 0              | 0              | 0                 | 10         | 37.8%      | 15.9%          | 23.6%          | 0.0%           | 0.0%           | 0.0% | 0.0%  | 10.5% |       |
| tr F1STR6 F1STR6 | 12            | 3          | 5          | 0              | 0              | 0              | 1              | 1              | 22         | 38         | 35             | 0              | 0              | 0              | 1                 | 2          | 44.4%      | 9.1%           | 16.0%          | 0.0%           | 0.0%           | 0.0% | 3.6%  | 3.6%  |       |
| tr K7GQE0 K7GQE0 | 1             | 1          | 0          | 0              | 0              | 0              | 0              | 0              | 1          | 58         | 0              | 0              | 0              | 0              | 0                 | 0          | 5.4%       | 2.5%           | 0.0%           | 0.0%           | 0.0%           | 0.0% | 0.0%  | 0.0%  |       |
| tr F1RKG8 F1RKG8 | 14            | 5          | 9          | 0              | 0              | 0              | 4              | 4              | 48         | 9          | 104            | 0              | 0              | 0              | 41                | 75         | 71.1%      | 38.0%          | 52.9%          | 0.0%           | 0.0%           | 0.0% | 32.1% | 27.3% |       |
| tr B5APU3 B5APU3 | 18            | 3          | 9          | 0              | 0              | 0              | 2              | 1              | 52         | 3          | 51             | 0              | 0              | 0              | 77                | 9          | 48.5%      | 9.6%           | 24.6%          | 0.0%           | 0.0%           | 0.0% | 7.4%  | 2.8%  |       |
| tr F1SIU2 F1SIU2 | 12            | 7          | 9          | 0              | 0              | 0              | 1              | 3              | 40         | 15         | 56             | 0              | 0              | 0              | 7                 | 17         | 41.4%      | 34.6%          | 22.8%          | 0.0%           | 0.0%           | 0.0% | 8.0%  | 9.5%  |       |
| tr F1SIV3 F1SIV3 | 12            | 7          | 10         | 0              | 0              | 0              | 1              | 3              | 40         | 15         | 61             | 0              | 0              | 0              | 7                 | 17         | 44.1%      | 36.8%          | 26.7%          | 0.0%           | 0.0%           | 0.0% | 8.5%  | 10    |       |

| Sample#            | Peptide Count |            |            |                |                |                |                |                | Spectral Count |            |            |                |                |                |                |                | Sequence Coverage |            |            |                |                |                |                |                |      |
|--------------------|---------------|------------|------------|----------------|----------------|----------------|----------------|----------------|----------------|------------|------------|----------------|----------------|----------------|----------------|----------------|-------------------|------------|------------|----------------|----------------|----------------|----------------|----------------|------|
|                    | Whole Cell    | Whole Cell | Whole Cell | Cilia Fraction | Whole Cell     | Whole Cell | Whole Cell | Cilia Fraction | Whole Cell        | Whole Cell | Whole Cell | Cilia Fraction |      |
|                    | 1             | 2          | 6          | 4              | 3              | 5              | 7              | 8              | 1              | 2          | 6          | 4              | 3              | 5              | 7              | 8              | 1                 | 2          | 6          | 4              | 3              | 5              | 7              | 8              |      |
| Accession          |               |            |            |                |                |                |                |                |                |            |            |                |                |                |                |                |                   |            |            |                |                |                |                |                |      |
| tr F1SGS9 F1SGS9   | 23            | 5          | 10         | 0              | 0              | 0              | 2              | 4              | 41             | 8          | 50         | 0              | 0              | 0              | 10             | 19             | 56.9%             | 10.2%      | 26.6%      | 0.0%           | 0.0%           | 0.0%           | 9.5%           | 16.7%          |      |
| tr F1SIA4 F1SIA4   | 6             | 6          | 6          | 0              | 0              | 0              | 1              | 4              | 8              | 40         | 31         | 0              | 0              | 0              | 2              | 10             | 17.2%             | 13.8%      | 12.7%      | 0.0%           | 0.0%           | 0.0%           | 3.9%           | 11.4%          |      |
| tr F1RM15 F1RM15   | 16            | 3          | 7          | 0              | 0              | 0              | 1              | 5              | 39             | 9          | 69         | 0              | 0              | 0              | 3              | 8              | 17.3%             | 2.8%       | 8.3%       | 0.0%           | 0.0%           | 0.0%           | 1.4%           | 8.1%           |      |
| tr F1RIE2 F1RIE2   | 14            | 6          | 5          | 0              | 0              | 0              | 2              | 12             | 37             | 10         | 137        | 0              | 0              | 0              | 6              | 27             | 14.0%             | 5.6%       | 7.9%       | 0.0%           | 0.0%           | 0.0%           | 4.2%           | 14.9%          |      |
| tr I3L7P7 I3L7P7   | 5             | 5          | 2          | 0              | 0              | 0              | 0              | 2              | 23             | 24         | 39         | 0              | 0              | 0              | 0              | 13             | 47.1%             | 47.1%      | 26.5%      | 0.0%           | 0.0%           | 0.0%           | 0.0%           | 20.6%          |      |
| P60662             | 8             | 4          | 5          | 0              | 0              | 0              | 1              | 3              | 40             | 5          | 46         | 0              | 0              | 0              | 109            | 86             | 42.4%             | 32.5%      | 31.1%      | 0.0%           | 0.0%           | 0.0%           | 6.0%           | 16.6%          |      |
| tr F1RII4 F1RII4   | 8             | 3          | 10         | 0              | 0              | 0              | 2              | 3              | 29             | 16         | 64         | 0              | 0              | 0              | 122            | 43             | 71.7%             | 22.5%      | 55.1%      | 0.0%           | 0.0%           | 0.0%           | 11.6%          | 33.3%          |      |
| tr I3LNA4 I3LNA4   | 7             | 3          | 4          | 0              | 0              | 0              | 0              | 2              | 36             | 9          | 24         | 0              | 0              | 0              | 0              | 12             | 28.6%             | 11.1%      | 8.7%       | 0.0%           | 0.0%           | 0.0%           | 0.0%           | 5.8%           |      |
| tr F2Z5J1 F2Z5J1   | 14            | 4          | 5          | 0              | 0              | 0              | 1              | 2              | 30             | 15         | 30         | 0              | 0              | 0              | 6              | 4              | 35.7%             | 7.5%       | 14.1%      | 0.0%           | 0.0%           | 0.0%           | 3.4%           | 7.5%           |      |
| tr I3LVK3 I3LVK3   | 15            | 3          | 7          | 0              | 0              | 0              | 1              | 4              | 36             | 9          | 69         | 0              | 0              | 0              | 3              | 6              | 16.2%             | 2.9%       | 8.5%       | 0.0%           | 0.0%           | 0.0%           | 1.4%           | 6.9%           |      |
| tr F1SSG6 F1SSG6   | 10            | 4          | 5          | 0              | 0              | 0              | 0              | 0              | 20             | 25         | 45         | 0              | 0              | 0              | 0              | 0              | 40.0%             | 22.7%      | 15.4%      | 0.0%           | 0.0%           | 0.0%           | 0.0%           | 0.0%           |      |
| P20305             | 13            | 9          | 13         | 0              | 0              | 0              | 6              | 15             | 27             | 17         | 68         | 0              | 0              | 0              | 102            | 104            | 33.8%             | 19.6%      | 18.7%      | 0.0%           | 0.0%           | 0.0%           | 16.6%          | 32.4%          |      |
| tr F1RQR0 F1RQR0   | 10            | 3          | 0          | 0              | 0              | 0              | 4              | 5              | 32             | 12         | 0          | 0              | 0              | 0              | 17             | 26             | 18.6%             | 7.0%       | 0.0%       | 0.0%           | 0.0%           | 0.0%           | 7.8%           | 12.2%          |      |
| P12309             | 11            | 3          | 1          | 0              | 0              | 0              | 2              | 3              | 26             | 18         | 5          | 0              | 0              | 0              | 11             | 12             | 69.8%             | 23.6%      | 13.2%      | 0.0%           | 0.0%           | 0.0%           | 27.4%          | 38.7%          |      |
| tr I3LFV4 I3LFV4   | 11            | 5          | 6          | 0              | 0              | 0              | 2              | 4              | 27             | 17         | 45         | 0              | 0              | 0              | 10             | 17             | 39.5%             | 26.5%      | 29.0%      | 0.0%           | 0.0%           | 0.0%           | 11.1%          | 24.7%          |      |
| tr F1RI41 F1RI41   | 5             | 2          | 1          | 0              | 0              | 0              | 0              | 1              | 18             | 26         | 5          | 0              | 0              | 0              | 0              | 2              | 29.4%             | 9.2%       | 6.9%       | 0.0%           | 0.0%           | 0.0%           | 0.0%           | 6.4%           |      |
| tr F1RSC3 F1RSC3   | 3             | 2          | 1          | 0              | 0              | 0              | 1              | 0              | 10             | 33         | 13         | 0              | 0              | 0              | 4              | 0              | 7.5%              | 4.4%       | 3.3%       | 0.0%           | 0.0%           | 0.0%           | 3.1%           | 0.0%           |      |
| tr F1RYA3 F1RYA3   | 12            | 3          | 4          | 0              | 0              | 0              | 1              | 0              | 34             | 9          | 17         | 0              | 0              | 0              | 2              | 0              | 17.4%             | 3.5%       | 5.7%       | 0.0%           | 0.0%           | 0.0%           | 1.8%           | 0.0%           |      |
| tr F1S1G5 F1S1G5   | 3             | 4          | 1          | 0              | 0              | 0              | 0              | 0              | 1              | 12         | 31         | 2              | 0              | 0              | 0              | 0              | 1                 | 8.2%       | 8.2%       | 2.4%           | 0.0%           | 0.0%           | 0.0%           | 0.0%           | 4.7% |
| Q52NJ4             | 16            | 3          | 7          | 0              | 0              | 0              | 6              | 9              | 35             | 7          | 32         | 0              | 0              | 0              | 17             | 65             | 60.4%             | 25.8%      | 43.4%      | 0.0%           | 0.0%           | 0.0%           | 46.2%          | 63.2%          |      |
| tr F1RJ25 F1RJ25   | 10            | 3          | 6          | 0              | 0              | 0              | 1              | 4              | 28             | 14         | 89         | 0              | 0              | 0              | 24             | 36             | 31.0%             | 16.8%      | 14.8%      | 0.0%           | 0.0%           | 0.0%           | 7.1%           | 14.8%          |      |
| tr I3LFC4 I3LFC4   | 9             | 1          | 4          | 0              | 0              | 0              | 0              | 4              | 18             | 24         | 16         | 0              | 0              | 0              | 0              | 24             | 27.0%             | 3.8%       | 17.2%      | 0.0%           | 0.0%           | 0.0%           | 0.0%           | 15.0%          |      |
| O62839             | 20            | 5          | 8          | 0              | 0              | 0              | 2              | 3              | 34             | 8          | 36         | 0              | 0              | 0              | 10             | 16             | 49.7%             | 10.2%      | 22.8%      | 0.0%           | 0.0%           | 0.0%           | 9.5%           | 14.0%          |      |
| tr F1S1X2 F1S1X2   | 6             | 3          | 3          | 0              | 0              | 0              | 1              | 5              | 26             | 15         | 10         | 0              | 0              | 0              | 5              | 32             | 36.2%             | 19.7%      | 25.7%      | 0.0%           | 0.0%           | 0.0%           | 9.9%           | 29.6%          |      |
| tr F1SPH1 F1SPH1   | 14            | 1          | 3          | 0              | 0              | 0              | 0              | 2              | 37             | 4          | 51         | 0              | 0              | 0              | 0              | 6              | 43.3%             | 5.7%       | 16.7%      | 0.0%           | 0.0%           | 0.0%           | 0.0%           | 11.0%          |      |
| tr I3LP11 I3LP11   | 7             | 3          | 7          | 0              | 0              | 0              | 1              | 1              | 18             | 23         | 52         | 0              | 0              | 0              | 3              | 1              | 14.2%             | 4.7%       | 10.6%      | 0.0%           | 0.0%           | 0.0%           | 3.2%           | 4.5%           |      |
| tr I3L6H2 I3L6H2   | 5             | 2          | 0          | 0              | 0              | 0              | 1              | 1              | 30             | 10         | 0          | 0              | 0              | 0              | 5              | 1              | 40.7%             | 22.9%      | 0.0%       | 0.0%           | 0.0%           | 0.0%           | 21.4%          | 21.4%          |      |
| tr K7G5E0 K7G5E0   | 17            | 1          | 11         | 0              | 0              | 0              | 1              | 1              | 39             | 1          | 195        | 0              | 0              | 0              | 3              | 1              | 24.2%             | 3.2%       | 22.4%      | 0.0%           | 0.0%           | 0.0%           | 3.2%           | 4.3%           |      |
| tr F1S9F3 F1S9F3   | 17            | 1          | 11         | 0              | 0              | 0              | 1              | 1              | 39             | 1          | 195        | 0              | 0              | 0              | 3              | 1              | 26.2%             | 3.5%       | 24.3%      | 0.0%           | 0.0%           | 0.0%           | 3.5%           | 4.7%           |      |
| tr I3LAI1 I3LAI1   | 4             | 2          | 3          | 0              | 0              | 0              | 1              | 0              | 31             | 8          | 11         | 0              | 0              | 0              | 8              | 0              | 11.5%             | 9.2%       | 8.8%       | 0.0%           | 0.0%           | 0.0%           | 6.5%           | 0.0%           |      |
| tr K7GKK5 K7GKK5   | 5             | 3          | 6          | 0              | 0              | 0              | 0              | 1              | 22             | 17         | 197        | 0              | 0              | 0              | 2              | 12             | 38.0%             | 32.8%      | 31.0%      | 0.0%           | 0.0%           | 0.0%           | 19.7%          | 27.5%          |      |
| tr F1SQ14 F1SQ14   | 5             | 3          | 6          | 0              | 0              | 0              | 1              | 3              | 22             | 17         | 197        | 0              | 0              | 0              | 2              | 12             | 35.5%             | 31.6%      | 28.9%      | 0.0%           | 0.0%           | 0.0%           | 18.4%          | 25.7%          |      |
| tr F1SBH2 F1SBH2   | 16            | 5          | 4          | 0              | 0              | 0              | 0              | 2              | 33             | 6          | 14         | 0              | 0              | 0              | 0              | 2              | 26.1%             | 9.0%       | 6.4%       | 0.0%           | 0.0%           | 0.0%           | 0.0%           | 2.2%           |      |
| P62197             | 14            | 2          | 5          | 0              | 0              | 0              | 0              | 1              | 35             | 3          | 20         | 0              | 0              | 0              | 0              | 1              | 40.4%             | 4.4%       | 17.0%      | 0.0%           | 0.0%           | 0.0%           | 0.0%           | 4.2%           |      |
| P62895             | 7             | 5          | 4          | 0              | 0              | 0              | 0              | 0              | 18             | 20         | 8          | 0              | 0              | 0              | 0              | 0              | 56.2%             | 61.0%      | 32.4%      | 0.0%           | 0.0%           | 0.0%           | 0.0%           | 0.0%           |      |
| tr F1SIT7 F1SIT7   | 5             | 2          | 1          | 0              | 0              | 0              | 2              | 1              | 20             | 17         | 14         | 0              | 0              | 0              | 15             | 4              | 66.7%             | 28.9%      | 14.0%      | 0.0%           | 0.0%           | 0.0%           | 51.8%          | 37.7%          |      |
| tr F1SS25 F1SS25   | 14            | 1          | 7          | 0              | 0              | 0              | 1              | 3              | 36             | 1          | 33         | 0              | 0              | 0              | 1              | 5              | 40.9%             | 2.5%       | 19.3%      | 0.0%           | 0.0%           | 0.0%           | 5.8%           | 14.5%          |      |
| tr I3LCI0 I3LCI0   | 10            | 4          | 5          | 0              | 0              | 0              | 1              | 4              | 32             | 4          | 43         | 0              | 0              | 0              | 2              | 21             | 35.4%             | 22.5%      | 17.5%      | 0.0%           | 0.0%           | 0.0%           | 5.3%           | 18.2%          |      |
| tr F1SSZ3 F1SSZ3   | 21            | 4          | 6          | 0              | 0              | 0              | 2              | 3              | 32             | 4          | 21         | 0              | 0              | 0              | 4              | 12             | 45.7%             | 10.9%      | 9.1%       | 0.0%           | 0.0%           | 0.0%           | 5.4%           | 9.9%           |      |
| tr F2Z5B4 F2Z5B4   | 16            | 2          | 14         | 0              | 0              | 0              | 1              | 3              | 34             | 2          | 106        | 0              | 0              | 0              | 1              | 17             | 34.6%             | 8.4%       | 28.0%      | 0.0%           | 0.0%           | 0.0%           | 4.2%           | 14.2%          |      |
| tr F1S1X3 F1S1X3   | 16            | 6          | 6          | 0              | 0              | 0              | 0              | 3              | 23             | 13         | 25         | 0              | 0              | 0              | 0              | 5              | 32.7%             | 12.9%      | 17.7%      | 0.0%           | 0.0%           | 0.0%           | 0.0%           | 9.1%           |      |
| tr K7GM70 K7GM70   | 11            | 7          | 15         | 0              | 0              | 0              | 1              | 1              | 20             | 16         | 282        | 0              | 0              | 0              | 24             | 1              | 25.2%             | 9.8%       | 28.1%      | 0.0%           | 0.0%           | 0.0%           | 1.7%           | 1.3%           |      |
| tr K7GL83 K7GL83   | 11            | 7          | 15         | 0              | 0              | 0              | 1              | 1              | 20             | 16         | 282        | 0              | 0              | 0              | 24             | 1              | 24.6%             | 9.5%       | 27.5%      | 0.0%           | 0.0%           | 0.0%           | 1.7%           | 1.3%           |      |
| tr K7GP99 K7GP99   | 11            | 7          | 15         | 0              | 0              | 0              | 1              | 1              | 20             | 16         | 282        | 0              | 0              | 0              | 24             | 1              | 21.5%             | 8.3%       | 24.0%      | 0.0%           | 0.0%           | 0.0%           | 1.5%           | 1.1%           |      |
| tr I3LS58 I3LS58   | 9             | 5          | 3          | 0              | 0              | 0              | 0              | 2              | 26             | 10         | 15         | 0              | 0              | 0              | 0              | 2              | 46.5%             | 18.8%      | 20.0%      | 0.0%           | 0.0%           | 0.0%           | 0.0%           | 11.4%          |      |
| tr C1PIG4 C1PIG4   | 12            | 4          | 9          | 0              | 0              | 0              | 6              | 5              | 28             | 7          | 45         | 0              | 0              | 0              | 51             | 44             | 29.4%             | 13.5%      | 26.9%      | 0.0%           | 0.0%           | 0.0%           | 23.4%          | 19.5%          |      |
| P67985             | 5             | 3          | 3          | 0              | 0              | 0              | 1              | 1              | 27             | 8          | 17         | 0              | 0              | 0              | 16             | 24             | 41.4%             | 39.1%      | 19.5%      | 0.0%           | 0.0%           | 0.0%           | 20.3%          | 20.3%          |      |
| tr F1SIPO F1SIPO   | 12            | 3          | 10         | 0              | 0              | 0              | 2              | 7              | 31             | 4          | 76         | 0              | 0              | 0              | 3              | 34             | 46.0%             | 9.1%       | 32.4%      | 0.0%           | 0.0%           | 0.0%           | 8.3%           | 27.1%          |      |
| tr F1SFF8 F1SFF8   | 10            | 4          | 4          | 0              | 0              | 0              | 1              | 1              | 13             | 22         | 15         | 0              | 0              | 0              | 1              | 5              | 16.6%             | 5.2%       | 5.6%       | 0.0%           | 0.0%           | 0.0%           | 1.6%           | 4.2%           |      |
| tr F1S1J9 F1S1J9   | 12            | 3          | 2          | 0              | 0              | 0              | 1              | 1              | 31             | 4          | 3          | 0              | 0              | 0              | 1              | 1              | 32.1%             | 15.0%      | 8.3%       | 0.0%           | 0.0%           | 0.0%           | 5.5%           | 5.5%           |      |
| tr F1SOR7 F1SOR7   | 16            | 3          | 7          | 0              | 0              | 0              | 0              | 1              | 32             | 3          | 64         | 0              | 0              | 0              | 1              | 0              | 34.3%             | 5.4%       | 11.2%      | 0.0%           | 0.0%           | 0.0%           | 2.6%           | 0.0%           |      |
| P29804             | 17            | 4          | 12         | 0              | 0              | 0              | 0              | 1              | 25             | 10         | 80         | 0              | 0              | 0              | 0              | 1              | 53.0%             | 14.1%      | 39.1%      | 0.0%           | 0.0%           | 0.0%           | 0.0%           | 8.0%           |      |
| tr I3LCI2 I3LCI2   | 17            | 4          | 12         | 0              | 0              | 0              | 0              | 1              | 25             | 10         | 80         | 0              | 0              | 0              | 0              | 1              | 52.8%             | 14.1%      | 39.0%      | 0.0%           | 0.0%           | 0.0%           | 0.0%           | 7.9%           |      |
| tr F1SDG7 F1SDG7   | 5             | 3          | 1          | 0              | 0              | 0              | 0              | 0              | 18             | 17         | 8          | 0              | 0              | 0              | 0              | 0              | 36.6%             | 20.9%      | 8.2%       | 0.0%           | 0.0%           | 0.0%           | 0.0%           | 0.0%           |      |
| tr F1SN47 F1SN47   | 10            | 3          | 2          | 0              | 0              | 0              | 0              | 0              | 22             | 13         | 8          | 0              | 0              | 0              | 0              | 0              | 28.5%             | 5.7%       | 6.0%       | 0.0%           | 0.0%           | 0.0%           | 0.0%           | 0.0%           |      |
| tr F1RK45 F1RK45   | 20            | 2          | 5          | 0              | 0              | 0              | 0              | 0              | 33             | 2          | 27         | 0              | 0              | 0              | 0              | 0              | 35.7%             | 4.3%       | 9.3%       | 0.0%           | 0.0%           | 0.0%           | 0.0%           | 0.0%           |      |
| tr F1S1G0 F1S1G0   | 9             | 2          | 3          | 0              | 0              | 0              | 2              | 2              | 31             | 3          | 14         | 0              | 0              | 0              | 7              | 4              | 27.1%             | 6.1%       | 7.2%       | 0.0%           | 0.0%           | 0.0%           | 8.5%           | 4.5%           |      |
| tr F1RUH7 F1RUH7   | 12            | 3          | 2          | 0              | 0              | 0              | 0              | 2              | 25             | 9          | 12         | 0              | 0              | 0              | 0              | 9              | 51.8%             | 16.7%      | 16.3%      | 0.0%           | 0.0%           | 0.0%           | 0.0%           | 12.2%          |      |
| tr F1SMB2 F1SMB2   | 8             | 4          | 3          | 0              | 0              | 0              | 1              | 1              | 27             | 7          | 79         | 0              | 0              | 0              | 4              | 2              | 14.4%             | 8.3%       | 7.9%       | 0.0%           | 0.0%           | 0.0%           | 2.6%           | 2.6%           |      |
| tr F1RVN1 F1RVN1   | 10            | 6          | 1          | 0              | 0              | 0              | 0              | 0              | 12             | 22         | 7          | 0              | 0              | 0              | 0              | 0              | 23.5%             | 10.3%      | 3.7%       | 0.0%           | 0.0%           | 0.0%           | 0.0%           | 0.0%           |      |
| Q29361             | 6             | 6          | 3          | 0              | 0              | 0              | 0              | 0              | 15             | 19         | 13         | 0              | 0              | 0              | 0              | 0              | 22.8%             | 27.6%      | 22.0%      | 0.0%           | 0.0%           | 0.0%           | 0.0%           | 0.0%           |      |
| tr I3LNNK5 I3LNNK5 | 12            | 3          | 6          | 0              | 0              | 0              | 1              | 5              |                |            |            |                |                |                |                |                |                   |            |            |                |                |                |                |                |      |

| Sample#          | Peptide Count |            |            |                |                |                |                | Spectral Count |            |            |                |                |                |                | Sequence Coverage |            |            |                |                |                |                |      |      |       |       |
|------------------|---------------|------------|------------|----------------|----------------|----------------|----------------|----------------|------------|------------|----------------|----------------|----------------|----------------|-------------------|------------|------------|----------------|----------------|----------------|----------------|------|------|-------|-------|
|                  | Whole Cell    | Whole Cell | Whole Cell | Cilia Fraction | Cilia Fraction | Cilia Fraction | Cilia Fraction | Whole Cell     | Whole Cell | Whole Cell | Cilia Fraction | Cilia Fraction | Cilia Fraction | Cilia Fraction | Whole Cell        | Whole Cell | Whole Cell | Cilia Fraction | Cilia Fraction | Cilia Fraction | Cilia Fraction |      |      |       |       |
|                  | 1             | 2          | 6          | 4              | 3              | 5              | 7              | 8              | 1          | 2          | 6              | 4              | 3              | 5              | 7                 | 8          | 1          | 2              | 6              | 4              | 3              | 5    | 7    | 8     |       |
| Accession        |               |            |            |                |                |                |                |                |            |            |                |                |                |                |                   |            |            |                |                |                |                |      |      |       |       |
| tr F1S5C5 F1S5C5 | 5             | 5          | 1          | 0              | 0              | 0              | 0              | 0              | 7          | 24         | 1              | 0              | 0              | 0              | 0                 | 0          | 11.4%      | 9.5%           | 1.4%           | 0.0%           | 0.0%           | 0.0% | 0.0% | 0.0%  |       |
| tr I3LUE8 I3LUE8 | 6             | 3          | 4          | 0              | 0              | 0              | 0              | 0              | 13         | 18         | 11             | 0              | 0              | 0              | 0                 | 0          | 15.6%      | 6.9%           | 9.9%           | 0.0%           | 0.0%           | 0.0% | 0.0% | 0.0%  |       |
| tr F1SMQ0 F1SMQ0 | 12            | 1          | 4          | 0              | 0              | 0              | 0              | 0              | 23         | 8          | 12             | 0              | 0              | 0              | 0                 | 0          | 23.5%      | 1.4%           | 6.3%           | 0.0%           | 0.0%           | 0.0% | 0.0% | 0.0%  |       |
| Q6UAQ8           | 8             | 2          | 8          | 0              | 0              | 0              | 0              | 0              | 27         | 4          | 66             | 0              | 0              | 0              | 0                 | 0          | 30.6%      | 19.2%          | 37.3%          | 0.0%           | 0.0%           | 0.0% | 0.0% | 0.0%  |       |
| A1XQ99           | 9             | 3          | 3          | 0              | 0              | 0              | 0              | 3              | 24         | 6          | 21             | 0              | 0              | 0              | 0                 | 67         | 74         | 23.5%          | 36.1%          | 16.0%          | 0.0%           | 0.0% | 0.0% | 19.3% |       |
| tr F2Z539 F2Z539 | 9             | 3          | 3          | 0              | 0              | 0              | 0              | 3              | 24         | 6          | 21             | 0              | 0              | 0              | 0                 | 67         | 74         | 23.5%          | 36.1%          | 16.0%          | 0.0%           | 0.0% | 0.0% | 19.3% |       |
| tr F2Z5N0 F2Z5N0 | 6             | 11         | 4          | 0              | 0              | 0              | 0              | 1              | 12         | 18         | 19             | 0              | 0              | 0              | 0                 | 1          | 13         | 33.3%          | 43.5%          | 21.5%          | 0.0%           | 0.0% | 0.0% | 6.9%  |       |
| tr J9JIM9 J9JIM9 | 13            | 3          | 7          | 0              | 0              | 0              | 0              | 1              | 26         | 4          | 79             | 0              | 0              | 0              | 0                 | 8          | 8          | 25.8%          | 11.2%          | 18.4%          | 0.0%           | 0.0% | 0.0% | 5.3%  |       |
| Q2QL3            | 13            | 3          | 7          | 0              | 0              | 0              | 0              | 1              | 26         | 4          | 79             | 0              | 0              | 0              | 0                 | 8          | 8          | 25.7%          | 11.2%          | 18.3%          | 0.0%           | 0.0% | 0.0% | 5.2%  |       |
| A5GF58           | 7             | 1          | 11         | 0              | 0              | 0              | 0              | 0              | 28         | 2          | 74             | 0              | 0              | 0              | 0                 | 0          | 7          | 32.9%          | 5.8%           | 37.4%          | 0.0%           | 0.0% | 0.0% | 0.0%  |       |
| tr I3LIY0 I3LIY0 | 2             | 3          | 1          | 0              | 0              | 0              | 0              | 0              | 3          | 27         | 2              | 0              | 0              | 0              | 0                 | 0          | 1          | 25.0%          | 26.8%          | 14.3%          | 0.0%           | 0.0% | 0.0% | 0.0%  |       |
| tr F1SL6 F1SL6   | 8             | 2          | 1          | 0              | 0              | 0              | 0              | 0              | 14         | 16         | 6              | 0              | 0              | 0              | 0                 | 0          | 1          | 10.5%          | 2.4%           | 2.7%           | 0.0%           | 0.0% | 0.0% | 0.0%  |       |
| tr F1RN65 F1RN65 | 2             | 1          | 1          | 0              | 0              | 0              | 0              | 1              | 14         | 16         | 14             | 0              | 0              | 0              | 0                 | 1          | 0          | 17.6%          | 17.6%          | 17.6%          | 0.0%           | 0.0% | 0.0% | 17.6% |       |
| tr I3LKJ6 I3LKJ6 | 7             | 1          | 0          | 0              | 0              | 0              | 0              | 0              | 9          | 21         | 0              | 0              | 0              | 0              | 0                 | 0          | 0          | 9.7%           | 1.9%           | 0.0%           | 0.0%           | 0.0% | 0.0% | 0.0%  |       |
| tr F1ST49 F1ST49 | 8             | 8          | 3          | 0              | 0              | 0              | 0              | 0              | 9          | 21         | 13             | 0              | 0              | 0              | 0                 | 0          | 0          | 14.7%          | 14.4%          | 4.9%           | 0.0%           | 0.0% | 0.0% | 0.0%  |       |
| tr I3LHF0 I3LHF0 | 6             | 3          | 8          | 0              | 0              | 0              | 0              | 3              | 22         | 7          | 24             | 0              | 0              | 0              | 0                 | 121        | 41         | 42.9%          | 34.7%          | 40.1%          | 0.0%           | 0.0% | 0.0% | 26.5% |       |
| Q9GL51           | 5             | 6          | 5          | 0              | 0              | 0              | 0              | 4              | 4          | 6          | 23             | 35             | 0              | 0              | 0                 | 0          | 27         | 18             | 14.9%          | 13.9%          | 11.7%          | 0.0% | 0.0% | 0.0%  | 14.6% |
| tr F2Z521 F2Z521 | 5             | 6          | 5          | 0              | 0              | 0              | 0              | 4              | 4          | 6          | 23             | 35             | 0              | 0              | 0                 | 0          | 27         | 18             | 14.9%          | 13.9%          | 11.7%          | 0.0% | 0.0% | 0.0%  | 14.6% |
| tr I3LKT8 I3LKT8 | 10            | 1          | 1          | 0              | 0              | 0              | 0              | 0              | 28         | 1          | 6              | 0              | 0              | 0              | 0                 | 0          | 5          | 45.9%          | 2.3%           | 1.8%           | 0.0%           | 0.0% | 0.0% | 0.0%  |       |
| tr I3LS70 I3LS70 | 8             | 0          | 0          | 0              | 0              | 0              | 0              | 1              | 29         | 0          | 0              | 0              | 0              | 0              | 0                 | 2          | 2          | 31.2%          | 0.0%           | 0.0%           | 0.0%           | 0.0% | 0.0% | 7.2%  |       |
| tr I3LSX7 I3LSX7 | 3             | 2          | 0          | 0              | 0              | 0              | 0              | 0              | 25         | 4          | 0              | 0              | 0              | 0              | 0                 | 0          | 4          | 32.1%          | 28.2%          | 0.0%           | 0.0%           | 0.0% | 0.0% | 0.0%  |       |
| tr F1S853 F1S853 | 12            | 2          | 7          | 0              | 0              | 0              | 0              | 0              | 3          | 26         | 3              | 26             | 0              | 0              | 0                 | 0          | 7          | 33.7%          | 5.1%           | 24.8%          | 0.0%           | 0.0% | 0.0% | 0.0%  |       |
| tr F1S710 F1S710 | 11            | 3          | 5          | 0              | 0              | 0              | 0              | 0              | 23         | 6          | 14             | 0              | 0              | 0              | 0                 | 0          | 4          | 47.0%          | 23.9%          | 17.4%          | 0.0%           | 0.0% | 0.0% | 0.0%  |       |
| tr F1RHM8 F1RHM8 | 7             | 3          | 4          | 0              | 0              | 0              | 0              | 0              | 1          | 25         | 4              | 21             | 0              | 0              | 0                 | 0          | 4          | 48.5%          | 21.8%          | 21.8%          | 0.0%           | 0.0% | 0.0% | 0.0%  |       |
| tr D3K5N7 D3K5N7 | 11            | 1          | 3          | 0              | 0              | 0              | 0              | 0              | 1          | 27         | 2              | 32             | 0              | 0              | 0                 | 0          | 0          | 3              | 33.7%          | 4.3%           | 18.1%          | 0.0% | 0.0% | 0.0%  | 0.0%  |
| tr K7GRM6 K7GRM6 | 6             | 3          | 7          | 0              | 0              | 0              | 0              | 1              | 1          | 8          | 21             | 54             | 0              | 0              | 0                 | 0          | 1          | 1              | 48.3%          | 23.2%          | 47.7%          | 0.0% | 0.0% | 0.0%  | 15.2% |
| tr F1SMZ9 F1SMZ9 | 14            | 2          | 12         | 0              | 0              | 0              | 0              | 1              | 1          | 27         | 2              | 69             | 0              | 0              | 0                 | 0          | 1          | 1              | 14.0%          | 1.9%           | 12.2%          | 0.0% | 0.0% | 0.0%  | 1.5%  |
| tr F1SPE9 F1SPE9 | 13            | 6          | 4          | 0              | 0              | 0              | 0              | 1              | 0          | 18         | 11             | 22             | 0              | 0              | 0                 | 0          | 1          | 0              | 8.2%           | 4.8%           | 2.9%           | 0.0% | 0.0% | 0.0%  | 1.2%  |
| tr K7GMN8 K7GMN8 | 15            | 3          | 11         | 0              | 0              | 0              | 0              | 0              | 1          | 22         | 7              | 65             | 0              | 0              | 0                 | 0          | 1          | 50.7%          | 8.6%           | 35.7%          | 0.0%           | 0.0% | 0.0% | 0.0%  |       |
| tr F1S8R2 F1S8R2 | 4             | 3          | 2          | 0              | 0              | 0              | 0              | 0              | 0          | 6          | 23             | 9              | 0              | 0              | 0                 | 0          | 0          | 0              | 16.2%          | 10.3%          | 9.7%           | 0.0% | 0.0% | 0.0%  | 0.0%  |
| tr I3LQK3 I3LQK3 | 4             | 1          | 2          | 0              | 0              | 0              | 0              | 1              | 3          | 27         | 1              | 8              | 0              | 0              | 0                 | 0          | 13         | 65             | 17.9%          | 10.3%          | 7.6%           | 0.0% | 0.0% | 0.0%  | 7.6%  |
| Q9N1F5           | 8             | 2          | 9          | 0              | 0              | 0              | 0              | 3              | 5          | 20         | 8              | 33             | 0              | 0              | 0                 | 0          | 29         | 25             | 40.7%          | 12.4%          | 33.6%          | 0.0% | 0.0% | 0.0%  | 17.0% |
| tr F1SL01 F1SL01 | 2             | 3          | 6          | 0              | 0              | 0              | 0              | 2              | 3          | 5          | 23             | 39             | 0              | 0              | 0                 | 0          | 3          | 14             | 5.3%           | 10.0%          | 25.4%          | 0.0% | 0.0% | 0.0%  | 14.5% |
| tr I3LNI2 I3LNI2 | 2             | 3          | 6          | 0              | 0              | 0              | 0              | 2              | 3          | 5          | 23             | 39             | 0              | 0              | 0                 | 0          | 3          | 14             | 5.3%           | 10.0%          | 25.3%          | 0.0% | 0.0% | 0.0%  | 14.4% |
| tr F1SHL3 F1SHL3 | 13            | 3          | 3          | 0              | 0              | 0              | 0              | 3              | 2          | 25         | 3              | 14             | 0              | 0              | 0                 | 0          | 5          | 5              | 23.1%          | 4.4%           | 5.1%           | 0.0% | 0.0% | 0.0%  | 5.2%  |
| tr I3LIJ0 I3LIJ0 | 11            | 2          | 6          | 0              | 0              | 0              | 0              | 0              | 2          | 25         | 3              | 21             | 0              | 0              | 0                 | 0          | 2          | 2              | 27.9%          | 5.5%           | 20.0%          | 0.0% | 0.0% | 0.0%  | 0.0%  |
| tr F1RVE8 F1RVE8 | 16            | 5          | 0          | 0              | 0              | 0              | 0              | 1              | 0          | 22         | 6              | 0              | 0              | 0              | 0                 | 0          | 1          | 0              | 19.6%          | 6.2%           | 0.0%           | 0.0% | 0.0% | 0.0%  | 1.9%  |
| tr F1SC98 F1SC98 | 11            | 4          | 5          | 0              | 0              | 0              | 0              | 0              | 1          | 24         | 4              | 13             | 0              | 0              | 0                 | 0          | 1          | 1              | 11.1%          | 3.0%           | 10.8%          | 0.0% | 0.0% | 0.0%  | 0.0%  |
| tr F1RL66 F1RL66 | 9             | 3          | 2          | 0              | 0              | 0              | 0              | 0              | 0          | 20         | 8              | 4              | 0              | 0              | 0                 | 0          | 0          | 0              | 8.2%           | 2.6%           | 1.5%           | 0.0% | 0.0% | 0.0%  | 0.0%  |
| tr F1RMT5 F1RMT5 | 8             | 6          | 2          | 0              | 0              | 0              | 0              | 0              | 0          | 8          | 20             | 9              | 0              | 0              | 0                 | 0          | 0          | 0              | 8.8%           | 5.9%           | 2.8%           | 0.0% | 0.0% | 0.0%  | 0.0%  |
| tr I3LUK9 I3LUK9 | 4             | 2          | 0          | 0              | 0              | 0              | 0              | 1              | 2          | 21         | 6              | 0              | 0              | 0              | 0                 | 0          | 5          | 5              | 36.5%          | 15.7%          | 0.0%           | 0.0% | 0.0% | 0.0%  | 20.9% |
| tr F1S105 F1S105 | 4             | 2          | 0          | 0              | 0              | 0              | 0              | 1              | 2          | 21         | 6              | 0              | 0              | 0              | 0                 | 0          | 5          | 5              | 28.6%          | 12.2%          | 0.0%           | 0.0% | 0.0% | 0.0%  | 16.3% |
| Q06AA9           | 4             | 2          | 0          | 0              | 0              | 0              | 0              | 1              | 2          | 21         | 6              | 0              | 0              | 0              | 0                 | 0          | 5          | 5              | 28.6%          | 12.2%          | 0.0%           | 0.0% | 0.0% | 0.0%  | 16.3% |
| P63221           | 5             | 2          | 6          | 0              | 0              | 0              | 0              | 1              | 1          | 24         | 3              | 85             | 0              | 0              | 0                 | 0          | 1          | 7              | 45.8%          | 32.5%          | 45.8%          | 0.0% | 0.0% | 0.0%  | 21.7% |
| tr K7GPJ3 K7GPJ3 | 12            | 3          | 7          | 0              | 0              | 0              | 0              | 0              | 1          | 18         | 9              | 41             | 0              | 0              | 0                 | 0          | 0          | 3              | 14.9%          | 3.0%           | 8.0%           | 0.0% | 0.0% | 0.0%  | 0.0%  |
| tr I3LKV0 I3LKV0 | 5             | 2          | 0          | 0              | 0              | 0              | 0              | 0              | 0          | 8          | 19             | 0              | 0              | 0              | 0                 | 0          | 0          | 0              | 51.0%          | 22.5%          | 0.0%           | 0.0% | 0.0% | 0.0%  | 0.0%  |
| P62863           | 3             | 3          | 1          | 0              | 0              | 0              | 0              | 0              | 0          | 6          | 21             | 1              | 0              | 0              | 0                 | 0          | 0          | 0              | 20.3%          | 20.3%          | 16.9%          | 0.0% | 0.0% | 0.0%  | 0.0%  |
| tr F1RQU9 F1RQU9 | 3             | 3          | 1          | 0              | 0              | 0              | 0              | 0              | 0          | 6          | 21             | 1              | 0              | 0              | 0                 | 0          | 0          | 0              | 9.0%           | 9.0%           | 7.5%           | 0.0% | 0.0% | 0.0%  | 0.0%  |
| tr I3LMT3 I3LMT3 | 5             | 4          | 1          | 0              | 0              | 0              | 0              | 0              | 0          | 7          | 20             | 3              | 0              | 0              | 0                 | 0          | 0          | 0              | 18.8%          | 9.6%           | 1.7%           | 0.0% | 0.0% | 0.0%  | 0.0%  |
| tr I3LD01 I3LD01 | 0             | 2          | 1          | 0              | 0              | 0              | 0              | 0              | 0          | 0          | 27             | 3              | 0              | 0              | 0                 | 0          | 0          | 0              | 0.0%           | 14.5%          | 7.8%           | 0.0% | 0.0% | 0.0%  | 0.0%  |
| tr F1SM17 F1SM17 | 7             | 2          | 2          | 0              | 0              | 0              | 0              | 0              | 0          | 13         | 14             | 14             | 0              | 0              | 0                 | 0          | 0          | 0              | 17.0%          | 4.1%           | 3.6%           | 0.0% | 0.0% | 0.0%  | 0.0%  |
| tr F1SRB9 F1SRB9 | 9             | 4          | 6          | 0              | 0              | 0              | 0              | 1              | 7          | 21         | 5              | 27             | 0              | 0              | 0                 | 0          | 1          | 41             | 20.9%          | 12.5%          | 11.1%          | 0.0% | 0.0% | 0.0%  | 3.0%  |
| tr F2Z5G9 F2Z5G9 | 4             | 3          | 1          | 0              | 0              | 0              | 0              | 2              | 2          | 21         | 5              | 6              | 0              | 0              | 0                 | 0          | 11         | 9              | 27.7%          | 27.7%          | 10.9%          | 0.0% | 0.0% | 0.0%  | 16.8% |
| tr F1RVC9 F1RVC9 | 4             | 3          | 2          | 0              | 0              | 0              | 0              | 0              | 4          | 7          | 19             | 6              | 0              | 0              | 0                 | 0          | 11         | 11             | 18.8%          | 19.3%          | 16.3%          | 0.0% | 0.0% | 0.0%  | 0.0%  |
| tr I3LAT6 I3LAT6 | 2             | 3          | 0          | 0              | 0              | 0              | 0              | 0              | 1          | 4          | 22             | 0              | 0              | 0              | 0                 | 0          | 6          | 6              | 6.6%           | 8.0%           | 0.0%           | 0.0% | 0.0% | 0.0%  | 0.0%  |
| tr F1S7E0 F1S7E0 | 13            | 0          | 1          | 0              | 0              | 0              | 0              | 2              | 2          | 26         | 0              | 7              | 0              | 0              | 0                 | 0          | 2          | 4              | 54.9%          | 0.0%           | 3.9%           | 0.0% | 0.0% | 0.0%  | 14.9% |
| tr F1RMC3 F1RMC3 | 7             | 4          | 4          | 0              | 0              | 0              | 0              | 3              | 0          | 9          | 17             | 13             | 0              | 0              | 0                 | 0          | 7          | 0              | 12.9%          | 4.6%           | 4.8%           | 0.0% | 0.0% | 0.0%  | 7.0%  |
| tr I3LIC4 I3LIC4 | 7             | 4          | 4          | 0              | 0              | 0              | 0              | 3              | 0          | 9          | 17             | 13             | 0              | 0              | 0                 | 0          | 7          | 0              | 12.9%          | 4.6%           | 4.8%           | 0.0% | 0.0% | 0.0%  | 7.0%  |
| tr F1S848 F1S848 | 10            | 3          | 0          | 0              | 0              | 0              | 0              | 0              | 1          | 21         | 5              | 0              | 0              | 0              | 0                 | 0          | 0          | 2              | 29.0%          | 8.4%           | 0.0%           | 0.0% | 0.0% | 0.0%  | 0.0%  |
| tr F2Z528 F2Z528 | 11            | 3          | 6          | 0              | 0              | 0              | 0              | 1              | 1          | 23         | 3              | 30             | 0              | 0              | 0                 | 0          | 2          | 1              | 56.3%          | 16.1%          | 28.7%          | 0.0% | 0.0% | 0.0%  | 9.2%  |
| Q29187           | 2             | 2          | 0          | 0              | 0              | 0              | 0              | 0              | 1          | 6          | 20             | 0              | 0              | 0              | 0                 | 0          | 0          | 1              | 11.9%          | 11.9%          | 0.0%           | 0.0% | 0.0% | 0.0%  | 10.9% |
| tr F1S585 F1S585 | 8             | 6          | 8          | 0              | 0              | 0              | 0              | 0              | 1          | 14         | 12             | 209            | 0              | 0              | 0                 | 0          | 0          | 1              | 16.5%          | 7.6%           |                |      |      |       |       |

| Sample#          | Peptide Count |            |            |                |                |                |                | Spectral Count |            |            |                |                |                |                | Sequence Coverage |            |            |                |                |                |                |      |       |       |
|------------------|---------------|------------|------------|----------------|----------------|----------------|----------------|----------------|------------|------------|----------------|----------------|----------------|----------------|-------------------|------------|------------|----------------|----------------|----------------|----------------|------|-------|-------|
|                  | Whole Cell    | Whole Cell | Whole Cell | Cilia Fraction | Cilia Fraction | Cilia Fraction | Cilia Fraction | Whole Cell     | Whole Cell | Whole Cell | Cilia Fraction | Cilia Fraction | Cilia Fraction | Cilia Fraction | Whole Cell        | Whole Cell | Whole Cell | Cilia Fraction | Cilia Fraction | Cilia Fraction | Cilia Fraction |      |       |       |
|                  | 1             | 2          | 6          | 4              | 3              | 5              | 7              | 8              | 1          | 2          | 6              | 4              | 3              | 5              | 7                 | 8          | 1          | 2              | 6              | 4              | 3              | 5    | 7     | 8     |
| Accession        |               |            |            |                |                |                |                |                |            |            |                |                |                |                |                   |            |            |                |                |                |                |      |       |       |
| tr F1SU06 F1SU06 | 10            | 0          | 1          | 0              | 0              | 0              | 0              | 0              | 25         | 0          | 29             | 0              | 0              | 0              | 0                 | 0          | 25.9%      | 0.0%           | 2.0%           | 0.0%           | 0.0%           | 0.0% | 0.0%  | 0.0%  |
| tr F1S179 F1S179 | 5             | 3          | 1          | 0              | 0              | 0              | 0              | 3              | 12         | 12         | 1              | 0              | 0              | 0              | 0                 | 51         | 54.2%      | 11.5%          | 9.2%           | 0.0%           | 0.0%           | 0.0% | 0.0%  | 54.2% |
| tr B8Y648 B8Y648 | 9             | 0          | 2          | 0              | 0              | 0              | 0              | 6              | 24         | 0          | 12             | 0              | 0              | 0              | 0                 | 26         | 48.1%      | 0.0%           | 20.1%          | 0.0%           | 0.0%           | 0.0% | 0.0%  | 41.6% |
| B2DCZ9           | 13            | 0          | 3          | 0              | 0              | 0              | 0              | 13             | 24         | 0          | 15             | 0              | 0              | 0              | 0                 | 28         | 19.7%      | 0.0%           | 5.4%           | 0.0%           | 0.0%           | 0.0% | 0.0%  | 23.6% |
| tr F1RLP5 F1RLP5 | 13            | 0          | 3          | 0              | 0              | 0              | 0              | 13             | 24         | 0          | 15             | 0              | 0              | 0              | 0                 | 28         | 19.7%      | 0.0%           | 5.4%           | 0.0%           | 0.0%           | 0.0% | 0.0%  | 23.6% |
| tr F1SM78 F1SM78 | 8             | 3          | 4          | 0              | 0              | 0              | 3              | 5              | 20         | 4          | 37             | 0              | 0              | 0              | 22                | 18         | 55.8%      | 29.7%          | 27.9%          | 0.0%           | 0.0%           | 0.0% | 23.3% | 57.0% |
| tr F1RZ71 F1RZ71 | 8             | 4          | 4          | 0              | 0              | 0              | 2              | 1              | 13         | 11         | 60             | 0              | 0              | 0              | 19                | 8          | 18.6%      | 7.0%           | 15.2%          | 0.0%           | 0.0%           | 0.0% | 7.2%  | 4.1%  |
| P49666           | 3             | 4          | 0          | 0              | 0              | 0              | 0              | 1              | 13         | 11         | 0              | 0              | 0              | 0              | 0                 | 5          | 17.7%      | 32.3%          | 0.0%           | 0.0%           | 0.0%           | 0.0% | 0.0%  | 17.7% |
| tr F1SC51 F1SC51 | 10            | 2          | 7          | 0              | 0              | 0              | 0              | 2              | 22         | 2          | 29             | 0              | 0              | 0              | 0                 | 9          | 37.3%      | 9.7%           | 20.3%          | 0.0%           | 0.0%           | 0.0% | 0.0%  | 10.9% |
| tr F1RQZ9 F1RQZ9 | 8             | 4          | 9          | 0              | 0              | 0              | 3              | 2              | 15         | 9          | 48             | 0              | 0              | 0              | 7                 | 4          | 15.0%      | 3.9%           | 14.9%          | 0.0%           | 0.0%           | 0.0% | 5.1%  | 4.3%  |
| tr F1SKJ5 F1SKJ5 | 9             | 3          | 6          | 0              | 0              | 0              | 0              | 1              | 14         | 10         | 81             | 0              | 0              | 0              | 0                 | 7          | 20.4%      | 7.7%           | 16.6%          | 0.0%           | 0.0%           | 0.0% | 0.0%  | 4.6%  |
| tr F1S062 F1S062 | 8             | 4          | 5          | 0              | 0              | 0              | 1              | 0              | 17         | 7          | 28             | 0              | 0              | 0              | 3                 | 0          | 36.1%      | 28.6%          | 21.8%          | 0.0%           | 0.0%           | 0.0% | 5.5%  | 0.0%  |
| tr K7GLA7 K7GLA7 | 10            | 3          | 7          | 0              | 0              | 0              | 0              | 1              | 15         | 9          | 68             | 0              | 0              | 0              | 0                 | 1          | 44.7%      | 13.3%          | 30.8%          | 0.0%           | 0.0%           | 0.0% | 0.0%  | 9.4%  |
| tr I3L9E0 I3L9E0 | 0             | 2          | 0          | 0              | 0              | 0              | 0              | 0              | 0          | 24         | 0              | 0              | 0              | 0              | 0                 | 0          | 0.0%       | 6.6%           | 0.0%           | 0.0%           | 0.0%           | 0.0% | 0.0%  | 0.0%  |
| tr F1SLI6 F1SLI6 | 5             | 2          | 0          | 0              | 0              | 0              | 0              | 0              | 9          | 15         | 0              | 0              | 0              | 0              | 0                 | 0          | 8.5%       | 1.9%           | 0.0%           | 0.0%           | 0.0%           | 0.0% | 0.0%  | 0.0%  |
| tr I3LEJ2 I3LEJ2 | 0             | 2          | 0          | 0              | 0              | 0              | 0              | 0              | 0          | 24         | 0              | 0              | 0              | 0              | 0                 | 0          | 0.0%       | 6.3%           | 0.0%           | 0.0%           | 0.0%           | 0.0% | 0.0%  | 0.0%  |
| tr F1SFR0 F1SFR0 | 4             | 1          | 1          | 0              | 0              | 0              | 0              | 0              | 13         | 11         | 5              | 0              | 0              | 0              | 0                 | 0          | 8.6%       | 2.1%           | 2.9%           | 0.0%           | 0.0%           | 0.0% | 0.0%  | 0.0%  |
| Q95281           | 3             | 2          | 1          | 0              | 0              | 0              | 0              | 0              | 13         | 11         | 87             | 0              | 0              | 0              | 0                 | 0          | 16.2%      | 16.2%          | 11.2%          | 0.0%           | 0.0%           | 0.0% | 0.0%  | 0.0%  |
| tr F2Z5V6 F2Z5V6 | 8             | 2          | 4          | 0              | 0              | 0              | 3              | 4              | 20         | 3          | 37             | 0              | 0              | 0              | 22                | 15         | 55.8%      | 12.2%          | 27.9%          | 0.0%           | 0.0%           | 0.0% | 23.3% | 39.5% |
| Q29221           | 5             | 2          | 1          | 0              | 0              | 0              | 1              | 3              | 20         | 3          | 8              | 0              | 0              | 0              | 1                 | 13         | 19.2%      | 5.9%           | 3.5%           | 0.0%           | 0.0%           | 0.0% | 5.6%  | 26.6% |
| Q6SEG5           | 10            | 1          | 4          | 0              | 0              | 0              | 0              | 6              | 22         | 1          | 11             | 0              | 0              | 0              | 0                 | 13         | 73.5%      | 3.6%           | 15.7%          | 0.0%           | 0.0%           | 0.0% | 0.0%  | 30.5% |
| tr F1SLF0 F1SLF0 | 10            | 2          | 3          | 0              | 0              | 0              | 1              | 3              | 21         | 2          | 20             | 0              | 0              | 0              | 8                 | 8          | 43.8%      | 9.4%           | 19.5%          | 0.0%           | 0.0%           | 0.0% | 7.1%  | 18.7% |
| tr F1SFE6 F1SFE6 | 11            | 4          | 4          | 0              | 0              | 0              | 1              | 1              | 16         | 7          | 37             | 0              | 0              | 0              | 5                 | 6          | 33.7%      | 12.4%          | 12.9%          | 0.0%           | 0.0%           | 0.0% | 7.4%  | 7.4%  |
| P43367           | 8             | 3          | 1          | 0              | 0              | 0              | 0              | 4              | 20         | 3          | 7              | 0              | 0              | 0              | 0                 | 5          | 31.2%      | 16.4%          | 3.1%           | 0.0%           | 0.0%           | 0.0% | 0.0%  | 25.9% |
| tr I3LKW2 I3LKW2 | 8             | 1          | 2          | 0              | 0              | 0              | 0              | 2              | 22         | 1          | 2              | 0              | 0              | 0              | 0                 | 3          | 21.0%      | 3.3%           | 6.6%           | 0.0%           | 0.0%           | 0.0% | 0.0%  | 4.4%  |
| tr I3LM03 I3LM03 | 8             | 3          | 4          | 0              | 0              | 0              | 2              | 4              | 17         | 6          | 165            | 0              | 0              | 0              | 7                 | 13         | 29.5%      | 15.3%          | 18.1%          | 0.0%           | 0.0%           | 0.0% | 11.0% | 14.6% |
| tr F1RGG2 F1RGG2 | 13            | 3          | 1          | 0              | 0              | 0              | 0              | 1              | 18         | 5          | 1              | 0              | 0              | 0              | 0                 | 2          | 18.5%      | 2.6%           | 1.3%           | 0.0%           | 0.0%           | 0.0% | 0.0%  | 1.3%  |
| tr I3L677 I3L677 | 9             | 4          | 1          | 0              | 0              | 0              | 0              | 1              | 14         | 9          | 1              | 0              | 0              | 0              | 0                 | 2          | 25.8%      | 7.1%           | 2.1%           | 0.0%           | 0.0%           | 0.0% | 0.0%  | 3.9%  |
| F1RKQ4           | 11            | 2          | 4          | 0              | 0              | 0              | 1              | 1              | 19         | 4          | 36             | 0              | 0              | 0              | 3                 | 1          | 31.3%      | 3.6%           | 11.4%          | 0.0%           | 0.0%           | 0.0% | 2.9%  | 2.9%  |
| tr F1RSB0 F1RSB0 | 5             | 2          | 2          | 0              | 0              | 0              | 0              | 2              | 8          | 15         | 12             | 0              | 0              | 0              | 0                 | 2          | 19.2%      | 6.4%           | 11.4%          | 0.0%           | 0.0%           | 0.0% | 0.0%  | 12.8% |
| tr F1SF95 F1SF95 | 1             | 3          | 0          | 0              | 0              | 0              | 0              | 1              | 2          | 21         | 0              | 0              | 0              | 0              | 0                 | 1          | 15.3%      | 14.7%          | 0.0%           | 0.0%           | 0.0%           | 0.0% | 0.0%  | 15.3% |
| tr F1SFH5 F1SFH5 | 6             | 1          | 0          | 0              | 0              | 0              | 0              | 0              | 13         | 10         | 0              | 0              | 0              | 0              | 0                 | 0          | 23.7%      | 2.6%           | 0.0%           | 0.0%           | 0.0%           | 0.0% | 0.0%  | 0.0%  |
| tr I3LDT2 I3LDT2 | 1             | 2          | 0          | 0              | 0              | 0              | 0              | 0              | 2          | 21         | 0              | 0              | 0              | 0              | 0                 | 0          | 0.4%       | 0.5%           | 0.0%           | 0.0%           | 0.0%           | 0.0% | 0.0%  | 0.0%  |
| tr F1RVX6 F1RVX6 | 3             | 5          | 0          | 0              | 0              | 0              | 0              | 0              | 3          | 20         | 0              | 0              | 0              | 0              | 0                 | 0          | 8.7%       | 10.5%          | 0.0%           | 0.0%           | 0.0%           | 0.0% | 0.0%  | 0.0%  |
| tr F1SI65 F1SI65 | 1             | 2          | 0          | 0              | 0              | 0              | 0              | 0              | 2          | 21         | 0              | 0              | 0              | 0              | 0                 | 0          | 0.4%       | 0.5%           | 0.0%           | 0.0%           | 0.0%           | 0.0% | 0.0%  | 0.0%  |
| tr I3LEJ9 I3LEJ9 | 1             | 1          | 1          | 0              | 0              | 0              | 0              | 0              | 7          | 16         | 6              | 0              | 0              | 0              | 0                 | 0          | 19.4%      | 19.4%          | 8.9%           | 0.0%           | 0.0%           | 0.0% | 0.0%  | 0.0%  |
| tr I3LU95 I3LU95 | 9             | 7          | 1          | 0              | 0              | 0              | 0              | 0              | 13         | 10         | 8              | 0              | 0              | 0              | 0                 | 0          | 12.2%      | 6.0%           | 1.5%           | 0.0%           | 0.0%           | 0.0% | 0.0%  | 0.0%  |
| tr F1RLH7 F1RLH7 | 5             | 1          | 8          | 0              | 0              | 0              | 0              | 0              | 14         | 9          | 27             | 0              | 0              | 0              | 0                 | 0          | 55.8%      | 14.0%          | 67.4%          | 0.0%           | 0.0%           | 0.0% | 0.0%  | 0.0%  |
| tr I3LP02 I3LP02 | 11            | 2          | 5          | 0              | 0              | 0              | 0              | 0              | 19         | 4          | 32             | 0              | 0              | 0              | 0                 | 0          | 39.7%      | 6.8%           | 20.1%          | 0.0%           | 0.0%           | 0.0% | 0.0%  | 0.0%  |
| tr F1SRV9 F1SRV9 | 5             | 1          | 3          | 0              | 0              | 0              | 0              | 5              | 12         | 10         | 14             | 0              | 0              | 0              | 0                 | 22         | 11.1%      | 1.8%           | 7.7%           | 0.0%           | 0.0%           | 0.0% | 0.0%  | 13.0% |
| P80276           | 10            | 1          | 1          | 0              | 0              | 0              | 1              | 6              | 20         | 2          | 14             | 0              | 0              | 0              | 4                 | 13         | 51.3%      | 4.4%           | 2.8%           | 0.0%           | 0.0%           | 0.0% | 11.1% | 43.4% |
| Q553G4           | 6             | 2          | 3          | 0              | 0              | 0              | 0              | 4              | 18         | 4          | 20             | 0              | 0              | 0              | 0                 | 16         | 30.2%      | 24.0%          | 28.7%          | 0.0%           | 0.0%           | 0.0% | 0.0%  | 30.2% |
| tr I3L650 I3L650 | 8             | 5          | 13         | 0              | 0              | 0              | 3              | 2              | 8          | 14         | 57             | 0              | 0              | 0              | 11                | 13         | 13.1%      | 8.4%           | 21.1%          | 0.0%           | 0.0%           | 0.0% | 8.9%  | 5.6%  |
| tr F1SQR0 F1SQR0 | 7             | 1          | 2          | 0              | 0              | 0              | 0              | 2              | 21         | 1          | 8              | 0              | 0              | 0              | 0                 | 5          | 44.2%      | 2.1%           | 6.1%           | 0.0%           | 0.0%           | 0.0% | 0.0%  | 9.2%  |
| tr I3LV46 I3LV46 | 7             | 1          | 2          | 0              | 0              | 0              | 0              | 0              | 21         | 1          | 8              | 0              | 0              | 0              | 0                 | 5          | 40.1%      | 1.9%           | 5.5%           | 0.0%           | 0.0%           | 0.0% | 0.0%  | 8.3%  |
| tr F1RQX8 F1RQX8 | 8             | 2          | 0          | 0              | 0              | 0              | 0              | 1              | 17         | 5          | 0              | 0              | 0              | 0              | 0                 | 2          | 9.2%       | 2.1%           | 0.0%           | 0.0%           | 0.0%           | 0.0% | 0.0%  | 0.8%  |
| ASD9M6           | 8             | 2          | 0          | 0              | 0              | 0              | 0              | 0              | 1          | 17         | 5              | 0              | 0              | 0              | 0                 | 2          | 8.8%       | 2.0%           | 0.0%           | 0.0%           | 0.0%           | 0.0% | 0.0%  | 0.8%  |
| tr F1SBS1 F1SBS1 | 8             | 5          | 5          | 0              | 0              | 0              | 0              | 2              | 13         | 9          | 12             | 0              | 0              | 0              | 0                 | 2          | 9.6%       | 7.1%           | 6.7%           | 0.0%           | 0.0%           | 0.0% | 0.0%  | 1.9%  |
| tr F1RZR6 F1RZR6 | 3             | 2          | 1          | 0              | 0              | 0              | 1              | 1              | 11         | 11         | 113            | 0              | 0              | 0              | 3                 | 4          | 33.3%      | 10.2%          | 7.9%           | 0.0%           | 0.0%           | 0.0% | 10.2% | 10.2% |
| tr I3LPJ0 I3LPJ0 | 3             | 2          | 0          | 0              | 0              | 0              | 0              | 0              | 6          | 16         | 0              | 0              | 0              | 0              | 0                 | 0          | 22.6%      | 9.7%           | 0.0%           | 0.0%           | 0.0%           | 0.0% | 0.0%  | 0.0%  |
| tr K7GSJ1 K7GSJ1 | 2             | 1          | 0          | 0              | 0              | 0              | 0              | 0              | 21         | 1          | 0              | 0              | 0              | 0              | 0                 | 0          | 68.0%      | 68.0%          | 0.0%           | 0.0%           | 0.0%           | 0.0% | 0.0%  | 0.0%  |
| tr F1SN95 F1SN95 | 11            | 3          | 3          | 0              | 0              | 0              | 0              | 0              | 17         | 5          | 11             | 0              | 0              | 0              | 0                 | 0          | 11.5%      | 4.2%           | 3.2%           | 0.0%           | 0.0%           | 0.0% | 0.0%  | 0.0%  |
| tr F1S9K1 F1S9K1 | 5             | 2          | 5          | 0              | 0              | 0              | 0              | 0              | 5          | 17         | 14             | 0              | 0              | 0              | 0                 | 0          | 12.6%      | 3.6%           | 9.7%           | 0.0%           | 0.0%           | 0.0% | 0.0%  | 0.0%  |
| tr F1ST98 F1ST98 | 6             | 2          | 3          | 0              | 0              | 0              | 3              | 2              | 17         | 4          | 15             | 0              | 0              | 0              | 80                | 2          | 39.3%      | 15.3%          | 15.3%          | 0.0%           | 0.0%           | 0.0% | 31.1% | 15.3% |
| tr F1RKM0 F1RKM0 | 11            | 1          | 9          | 0              | 0              | 0              | 2              | 7              | 20         | 1          | 24             | 0              | 0              | 0              | 16                | 27         | 23.7%      | 1.9%           | 16.0%          | 0.0%           | 0.0%           | 0.0% | 6.8%  | 17.1% |
| tr I3LBF7 I3LBF7 | 6             | 2          | 3          | 0              | 0              | 0              | 3              | 4              | 18         | 3          | 33             | 0              | 0              | 0              | 22                | 15         | 43.8%      | 11.8%          | 16.9%          | 0.0%           | 0.0%           | 0.0% | 22.5% | 38.2% |
| tr F1SQW0 F1SQW0 | 8             | 2          | 4          | 0              | 0              | 0              | 1              | 2              | 17         | 4          | 30             | 0              | 0              | 0              | 13                | 7          | 26.3%      | 6.2%           | 14.2%          | 0.0%           | 0.0%           | 0.0% | 2.5%  | 9.6%  |
| tr F1SNH3 F1SNH3 | 7             | 5          | 13         | 0              | 0              | 0              | 3              | 2              | 7          | 14         | 57             | 0              | 0              | 0              | 11                | 13         | 15.6%      | 11.9%          | 29.9%          | 0.0%           | 0.0%           | 0.0% | 12.7% | 7.9%  |
| tr F1S880 F1S880 | 9             | 2          | 3          | 0              | 0              | 0              | 0              | 1              | 17         | 4          | 17             | 0              | 0              | 0              | 0                 | 10         | 32.7%      | 12.4%          | 15.1%          | 0.0%           | 0.0%           | 0.0% | 0.0%  | 7.3%  |
| tr I3L656 I3L656 | 7             | 1          | 0          | 0              | 0              | 0              | 0              | 2              | 20         | 1          | 0              | 0              | 0              | 0              | 0                 | 5          | 41.1%      | 7.3%           | 0.0%           | 0.0%           | 0.0%           | 0.0% | 0.0%  | 21.0% |
| tr K7GRD3 K7GRD3 | 6             | 1          | 2          | 0              | 0              | 0              | 0              | 0              | 20         | 1          | 8              | 0              | 0              | 0              | 0                 | 5          | 37.7%      | 2.2%           | 6.2%           | 0.0%           | 0.0%           | 0.0% | 0.0%  | 9.4%  |
| tr I3LN31 I3LN31 | 12            | 3          | 6          | 0              | 0              | 0              | 1              | 4              | 18         | 3          | 33             | 0              | 0              | 0              | 2                 | 7          | 49.3%      | 10.9%          | 18.2%          | 0.0%           | 0.0%           | 0.0% | 7.0%  | 25.6% |
| tr I3L754 I3L754 | 7             | 5          | 21         | 0              | 0              | 0              | 3              |                |            |            |                |                |                |                |                   |            |            |                |                |                |                |      |       |       |

| Sample#          | Peptide Count |            |            |                |                |                |                | Spectral Count |            |            |                |                |                |                | Sequence Coverage |            |            |                |                |                |                |      |       |       |
|------------------|---------------|------------|------------|----------------|----------------|----------------|----------------|----------------|------------|------------|----------------|----------------|----------------|----------------|-------------------|------------|------------|----------------|----------------|----------------|----------------|------|-------|-------|
|                  | Whole Cell    | Whole Cell | Whole Cell | Cilia Fraction | Cilia Fraction | Cilia Fraction | Cilia Fraction | Whole Cell     | Whole Cell | Whole Cell | Cilia Fraction | Cilia Fraction | Cilia Fraction | Cilia Fraction | Whole Cell        | Whole Cell | Whole Cell | Cilia Fraction | Cilia Fraction | Cilia Fraction | Cilia Fraction |      |       |       |
|                  | 1             | 2          | 6          | 4              | 3              | 5              | 7              | 8              | 1          | 2          | 6              | 4              | 3              | 5              | 7                 | 8          | 1          | 2              | 6              | 4              | 3              | 5    | 7     | 8     |
| Accession        |               |            |            |                |                |                |                |                |            |            |                |                |                |                |                   |            |            |                |                |                |                |      |       |       |
| tr F1SKF9 F1SKF9 | 11            | 3          | 6          | 0              | 0              | 0              | 1              | 3              | 17         | 3          | 33             | 0              | 0              | 0              | 2                 | 4          | 54.1%      | 13.3%          | 22.1%          | 0.0%           | 0.0%           | 0.0% | 8.5%  | 17.8% |
| tr F1SD96 F1SD96 | 2             | 3          | 0          | 0              | 0              | 0              | 0              | 1              | 5          | 15         | 0              | 0              | 0              | 0              | 0                 | 2          | 12.6%      | 7.1%           | 0.0%           | 0.0%           | 0.0%           | 0.0% | 0.0%  | 7.9%  |
| tr I3LHB2 I3LHB2 | 9             | 6          | 2          | 0              | 0              | 0              | 1              | 0              | 10         | 10         | 7              | 0              | 0              | 0              | 2                 | 0          | 20.3%      | 17.3%          | 3.0%           | 0.0%           | 0.0%           | 0.0% | 4.3%  | 0.0%  |
| tr F1RHH4 F1RHH4 | 9             | 6          | 2          | 0              | 0              | 0              | 1              | 0              | 10         | 10         | 7              | 0              | 0              | 0              | 2                 | 0          | 20.6%      | 17.5%          | 3.1%           | 0.0%           | 0.0%           | 0.0% | 4.4%  | 0.0%  |
| tr D0G777 D0G777 | 5             | 2          | 5          | 0              | 0              | 0              | 1              | 1              | 12         | 8          | 36             | 0              | 0              | 0              | 3                 | 1          | 15.7%      | 8.6%           | 17.0%          | 0.0%           | 0.0%           | 0.0% | 3.3%  | 4.1%  |
| tr F1RNZ1 F1RNZ1 | 3             | 4          | 5          | 0              | 0              | 0              | 0              | 1              | 9          | 11         | 22             | 0              | 0              | 0              | 0                 | 2          | 26.6%      | 17.2%          | 14.2%          | 0.0%           | 0.0%           | 0.0% | 0.0%  | 8.8%  |
| tr Q2XVP5 Q2XVP5 | 9             | 0          | 6          | 0              | 0              | 0              | 1              | 0              | 20         | 0          | 22             | 0              | 0              | 0              | 1                 | 0          | 43.7%      | 0.0%           | 17.5%          | 0.0%           | 0.0%           | 0.0% | 4.5%  | 0.0%  |
| tr F1SJ65 F1SJ65 | 1             | 1          | 0          | 0              | 0              | 0              | 0              | 0              | 1          | 19         | 0              | 0              | 0              | 0              | 0                 | 0          | 10.1%      | 7.5%           | 0.0%           | 0.0%           | 0.0%           | 0.0% | 0.0%  | 0.0%  |
| tr I3LV00 I3LV00 | 3             | 4          | 0          | 0              | 0              | 0              | 0              | 0              | 3          | 17         | 0              | 0              | 0              | 0              | 0                 | 0          | 1.2%       | 1.7%           | 0.0%           | 0.0%           | 0.0%           | 0.0% | 0.0%  | 0.0%  |
| Q764M6           | 2             | 2          | 0          | 0              | 0              | 0              | 0              | 0              | 16         | 4          | 0              | 0              | 0              | 0              | 0                 | 0          | 11.5%      | 7.9%           | 0.0%           | 0.0%           | 0.0%           | 0.0% | 0.0%  | 0.0%  |
| tr F1RJ58 F1RJ58 | 3             | 4          | 0          | 0              | 0              | 0              | 0              | 0              | 3          | 17         | 0              | 0              | 0              | 0              | 0                 | 0          | 1.2%       | 1.7%           | 0.0%           | 0.0%           | 0.0%           | 0.0% | 0.0%  | 0.0%  |
| tr F1RG40 F1RG40 | 6             | 4          | 1          | 0              | 0              | 0              | 0              | 0              | 7          | 13         | 1              | 0              | 0              | 0              | 0                 | 0          | 8.7%       | 3.4%           | 1.9%           | 0.0%           | 0.0%           | 0.0% | 0.0%  | 0.0%  |
| tr I3LA48 I3LA48 | 1             | 3          | 1          | 0              | 0              | 0              | 0              | 0              | 1          | 19         | 5              | 0              | 0              | 0              | 0                 | 0          | 1.0%       | 2.0%           | 1.5%           | 0.0%           | 0.0%           | 0.0% | 0.0%  | 0.0%  |
| tr I3LMI9 I3LMI9 | 1             | 3          | 1          | 0              | 0              | 0              | 0              | 0              | 1          | 19         | 5              | 0              | 0              | 0              | 0                 | 0          | 1.0%       | 2.0%           | 1.5%           | 0.0%           | 0.0%           | 0.0% | 0.0%  | 0.0%  |
| tr F1SEP0 F1SEP0 | 5             | 2          | 2          | 0              | 0              | 0              | 0              | 0              | 9          | 11         | 5              | 0              | 0              | 0              | 0                 | 0          | 8.4%       | 2.9%           | 2.9%           | 0.0%           | 0.0%           | 0.0% | 0.0%  | 0.0%  |
| tr F1SOL8 F1SOL8 | 8             | 1          | 7          | 0              | 0              | 0              | 0              | 0              | 12         | 8          | 31             | 0              | 0              | 0              | 0                 | 0          | 19.8%      | 1.9%           | 13.4%          | 0.0%           | 0.0%           | 0.0% | 0.0%  | 0.0%  |
| tr F2Z515 F2Z515 | 10            | 0          | 3          | 0              | 0              | 0              | 2              | 10             | 19         | 0          | 9              | 0              | 0              | 0              | 12                | 56         | 25.1%      | 0.0%           | 7.2%           | 0.0%           | 0.0%           | 0.0% | 11.0% | 29.4% |
| tr I3LU12 I3LU12 | 6             | 2          | 1          | 0              | 0              | 0              | 2              | 5              | 13         | 6          | 5              | 0              | 0              | 0              | 3                 | 22         | 33.3%      | 10.8%          | 20.6%          | 0.0%           | 0.0%           | 0.0% | 32.4% | 33.3% |
| P67776           | 10            | 1          | 3          | 0              | 0              | 0              | 1              | 5              | 18         | 1          | 14             | 0              | 0              | 0              | 4                 | 29         | 54.4%      | 8.1%           | 14.9%          | 0.0%           | 0.0%           | 0.0% | 8.1%  | 19.7% |
| P11493           | 10            | 1          | 3          | 0              | 0              | 0              | 1              | 5              | 18         | 1          | 14             | 0              | 0              | 0              | 4                 | 29         | 57.3%      | 8.5%           | 15.7%          | 0.0%           | 0.0%           | 0.0% | 8.5%  | 20.8% |
| tr F1RX68 F1RX68 | 10            | 1          | 3          | 0              | 0              | 0              | 1              | 5              | 18         | 1          | 14             | 0              | 0              | 0              | 4                 | 29         | 60.2%      | 9.0%           | 16.5%          | 0.0%           | 0.0%           | 0.0% | 9.0%  | 21.9% |
| Q29068           | 3             | 1          | 2          | 0              | 0              | 0              | 2              | 2              | 18         | 1          | 28             | 0              | 0              | 0              | 17                | 10         | 36.6%      | 24.4%          | 36.6%          | 0.0%           | 0.0%           | 0.0% | 36.6% | 36.6% |
| tr F1SBT6 F1SBT6 | 8             | 3          | 9          | 0              | 0              | 0              | 4              | 3              | 16         | 3          | 84             | 0              | 0              | 0              | 9                 | 35         | 17.0%      | 4.4%           | 16.7%          | 0.0%           | 0.0%           | 0.0% | 10.0% | 8.2%  |
| tr I3LP80 I3LP80 | 4             | 1          | 0          | 0              | 0              | 0              | 0              | 3              | 18         | 1          | 0              | 0              | 0              | 0              | 0                 | 7          | 22.1%      | 6.9%           | 0.0%           | 0.0%           | 0.0%           | 0.0% | 0.0%  | 22.1% |
| tr F1RUP7 F1RUP7 | 5             | 1          | 0          | 0              | 0              | 0              | 0              | 2              | 18         | 1          | 0              | 0              | 0              | 0              | 0                 | 5          | 34.3%      | 7.4%           | 0.0%           | 0.0%           | 0.0%           | 0.0% | 0.0%  | 21.3% |
| tr K7GK11 K7GK11 | 5             | 3          | 7          | 0              | 0              | 0              | 1              | 0              | 11         | 8          | 73             | 0              | 0              | 0              | 24                | 0          | 27.9%      | 9.7%           | 28.5%          | 0.0%           | 0.0%           | 0.0% | 4.0%  | 0.0%  |
| tr F1SNZ6 F1SNZ6 | 5             | 4          | 2          | 0              | 0              | 0              | 0              | 1              | 10         | 9          | 4              | 0              | 0              | 0              | 0                 | 5          | 9.9%       | 17.6%          | 6.6%           | 0.0%           | 0.0%           | 0.0% | 0.0%  | 3.3%  |
| tr F1RQP0 F1RQP0 | 7             | 2          | 7          | 0              | 0              | 0              | 1              | 2              | 15         | 4          | 48             | 0              | 0              | 0              | 1                 | 5          | 42.0%      | 10.5%          | 42.6%          | 0.0%           | 0.0%           | 0.0% | 9.9%  | 18.5% |
| tr F1SJN5 F1SJN5 | 6             | 2          | 2          | 0              | 0              | 0              | 0              | 1              | 12         | 7          | 3              | 0              | 0              | 0              | 0                 | 1          | 19.1%      | 4.5%           | 6.1%           | 0.0%           | 0.0%           | 0.0% | 0.0%  | 6.1%  |
| tr F1RR49 F1RR49 | 3             | 3          | 0          | 0              | 0              | 0              | 0              | 0              | 3          | 16         | 0              | 0              | 0              | 0              | 0                 | 0          | 3.5%       | 2.1%           | 0.0%           | 0.0%           | 0.0%           | 0.0% | 0.0%  | 0.0%  |
| tr F1RS55 F1RS55 | 2             | 2          | 0          | 0              | 0              | 0              | 0              | 0              | 5          | 14         | 0              | 0              | 0              | 0              | 0                 | 0          | 12.3%      | 12.3%          | 0.0%           | 0.0%           | 0.0%           | 0.0% | 0.0%  | 0.0%  |
| tr F1RQQ8 F1RQQ8 | 1             | 2          | 0          | 0              | 0              | 0              | 0              | 0              | 1          | 18         | 0              | 0              | 0              | 0              | 0                 | 0          | 1.0%       | 2.6%           | 0.0%           | 0.0%           | 0.0%           | 0.0% | 0.0%  | 0.0%  |
| tr F1SS78 F1SS78 | 0             | 1          | 1          | 0              | 0              | 0              | 0              | 0              | 0          | 19         | 2              | 0              | 0              | 0              | 0                 | 0          | 0.0%       | 8.6%           | 13.8%          | 0.0%           | 0.0%           | 0.0% | 0.0%  | 0.0%  |
| A7Y521           | 9             | 0          | 1          | 0              | 0              | 0              | 0              | 0              | 19         | 0          | 3              | 0              | 0              | 0              | 0                 | 0          | 29.1%      | 0.0%           | 3.0%           | 0.0%           | 0.0%           | 0.0% | 0.0%  | 0.0%  |
| tr F1SP81 F1SP81 | 4             | 2          | 2          | 0              | 0              | 0              | 0              | 0              | 8          | 11         | 3              | 0              | 0              | 0              | 0                 | 0          | 9.1%       | 4.2%           | 3.0%           | 0.0%           | 0.0%           | 0.0% | 0.0%  | 0.0%  |
| tr I3LVD6 I3LVD6 | 8             | 0          | 1          | 0              | 0              | 0              | 0              | 0              | 19         | 0          | 6              | 0              | 0              | 0              | 0                 | 0          | 16.2%      | 0.0%           | 3.5%           | 0.0%           | 0.0%           | 0.0% | 0.0%  | 0.0%  |
| tr F1SQ55 F1SQ55 | 8             | 0          | 1          | 0              | 0              | 0              | 0              | 0              | 19         | 0          | 6              | 0              | 0              | 0              | 0                 | 0          | 16.3%      | 0.0%           | 3.5%           | 0.0%           | 0.0%           | 0.0% | 0.0%  | 0.0%  |
| tr F1RU62 F1RU62 | 1             | 6          | 1          | 0              | 0              | 0              | 0              | 0              | 1          | 18         | 7              | 0              | 0              | 0              | 0                 | 0          | 2.2%       | 6.1%           | 1.6%           | 0.0%           | 0.0%           | 0.0% | 0.0%  | 0.0%  |
| tr F1RUV6 F1RUV6 | 6             | 0          | 3          | 0              | 0              | 0              | 0              | 0              | 19         | 0          | 15             | 0              | 0              | 0              | 0                 | 0          | 23.2%      | 0.0%           | 12.0%          | 0.0%           | 0.0%           | 0.0% | 0.0%  | 0.0%  |
| tr K7GPJ4 K7GPJ4 | 8             | 3          | 4          | 0              | 0              | 0              | 0              | 0              | 12         | 7          | 19             | 0              | 0              | 0              | 0                 | 0          | 24.0%      | 8.1%           | 9.9%           | 0.0%           | 0.0%           | 0.0% | 0.0%  | 0.0%  |
| tr F1SFR6 F1SFR6 | 10            | 3          | 13         | 0              | 0              | 0              | 0              | 0              | 16         | 3          | 147            | 0              | 0              | 0              | 0                 | 0          | 26.6%      | 10.4%          | 35.9%          | 0.0%           | 0.0%           | 0.0% | 0.0%  | 0.0%  |
| P53590           | 10            | 3          | 13         | 0              | 0              | 0              | 0              | 0              | 16         | 3          | 147            | 0              | 0              | 0              | 0                 | 0          | 26.6%      | 10.4%          | 35.8%          | 0.0%           | 0.0%           | 0.0% | 0.0%  | 0.0%  |
| tr F1SCF0 F1SCF0 | 2             | 3          | 0          | 0              | 0              | 0              | 0              | 2              | 7          | 11         | 0              | 0              | 0              | 0              | 0                 | 24         | 3.1%       | 4.5%           | 0.0%           | 0.0%           | 0.0%           | 0.0% | 0.0%  | 3.1%  |
| tr F1SM07 F1SM07 | 5             | 2          | 0          | 0              | 0              | 0              | 0              | 3              | 6          | 12         | 0              | 0              | 0              | 0              | 0                 | 21         | 48.3%      | 12.4%          | 0.0%           | 0.0%           | 0.0%           | 0.0% | 0.0%  | 28.7% |
| tr F1S8S4 F1S8S4 | 8             | 1          | 2          | 0              | 0              | 0              | 1              | 4              | 17         | 1          | 4              | 0              | 0              | 0              | 4                 | 20         | 10.8%      | 2.1%           | 3.6%           | 0.0%           | 0.0%           | 0.0% | 3.1%  | 8.9%  |
| tr F1RI11 F1RI11 | 9             | 1          | 3          | 0              | 0              | 0              | 1              | 5              | 17         | 1          | 14             | 0              | 0              | 0              | 4                 | 29         | 61.6%      | 9.8%           | 18.0%          | 0.0%           | 0.0%           | 0.0% | 9.8%  | 23.9% |
| tr F1S8T7 F1S8T7 | 3             | 0          | 2          | 0              | 0              | 0              | 2              | 1              | 18         | 0          | 16             | 0              | 0              | 0              | 15                | 6          | 23.9%      | 0.0%           | 19.3%          | 0.0%           | 0.0%           | 0.0% | 19.3% | 11.9% |
| Q95250           | 4             | 3          | 3          | 0              | 0              | 0              | 0              | 3              | 12         | 6          | 9              | 0              | 0              | 0              | 0                 | 13         | 28.4%      | 7.7%           | 30.4%          | 0.0%           | 0.0%           | 0.0% | 0.0%  | 28.4% |
| tr F1S6K5 F1S6K5 | 4             | 3          | 1          | 0              | 0              | 0              | 1              | 1              | 14         | 4          | 8              | 0              | 0              | 0              | 7                 | 4          | 26.7%      | 10.0%          | 7.2%           | 0.0%           | 0.0%           | 0.0% | 8.9%  | 11.1% |
| tr I3LJ50 I3LJ50 | 5             | 3          | 1          | 0              | 0              | 0              | 0              | 1              | 11         | 7          | 3              | 0              | 0              | 0              | 0                 | 6          | 23.8%      | 7.5%           | 4.2%           | 0.0%           | 0.0%           | 0.0% | 0.0%  | 6.9%  |
| tr F1RKW7 F1RKW7 | 0             | 4          | 2          | 0              | 0              | 0              | 2              | 2              | 0          | 18         | 7              | 0              | 0              | 0              | 3                 | 4          | 0.0%       | 5.0%           | 2.8%           | 0.0%           | 0.0%           | 0.0% | 7.3%  | 7.3%  |
| tr F1SFH7 F1SFH7 | 10            | 1          | 5          | 0              | 0              | 0              | 1              | 3              | 16         | 2          | 31             | 0              | 0              | 0              | 2                 | 9          | 29.0%      | 3.1%           | 27.0%          | 0.0%           | 0.0%           | 0.0% | 6.9%  | 14.3% |
| P83686           | 7             | 2          | 2          | 0              | 0              | 0              | 0              | 3              | 14         | 4          | 10             | 0              | 0              | 0              | 0                 | 6          | 48.2%      | 11.0%          | 6.2%           | 0.0%           | 0.0%           | 0.0% | 0.0%  | 14.3% |
| tr F1SJQ5 F1SJQ5 | 7             | 2          | 2          | 0              | 0              | 0              | 0              | 3              | 14         | 4          | 10             | 0              | 0              | 0              | 0                 | 6          | 42.7%      | 9.8%           | 5.5%           | 0.0%           | 0.0%           | 0.0% | 0.0%  | 12.7% |
| tr F1SS16 F1SS16 | 6             | 2          | 2          | 0              | 0              | 0              | 1              | 1              | 15         | 3          | 16             | 0              | 0              | 0              | 3                 | 4          | 23.4%      | 8.2%           | 5.8%           | 0.0%           | 0.0%           | 0.0% | 5.4%  | 2.8%  |
| tr F1SKD5 F1SKD5 | 8             | 3          | 1          | 0              | 0              | 0              | 0              | 1              | 11         | 7          | 8              | 0              | 0              | 0              | 0                 | 5          | 14.3%      | 3.2%           | 2.1%           | 0.0%           | 0.0%           | 0.0% | 0.0%  | 3.1%  |
| tr F1SUG4 F1SUG4 | 5             | 1          | 4          | 0              | 0              | 0              | 1              | 1              | 10         | 8          | 10             | 0              | 0              | 0              | 1                 | 3          | 39.8%      | 10.2%          | 46.6%          | 0.0%           | 0.0%           | 0.0% | 10.2% | 32.2% |
| tr F1S193 F1S193 | 8             | 2          | 6          | 0              | 0              | 0              | 0              | 1              | 15         | 3          | 17             | 0              | 0              | 0              | 0                 | 4          | 28.2%      | 9.3%           | 27.2%          | 0.0%           | 0.0%           | 0.0% | 0.0%  | 7.7%  |
| tr F1S194 F1S194 | 8             | 2          | 6          | 0              | 0              | 0              | 0              | 1              | 15         | 3          | 17             | 0              | 0              | 0              | 0                 | 4          | 26.5%      | 8.7%           | 25.6%          | 0.0%           | 0.0%           | 0.0% | 0.0%  | 7.2%  |
| tr I3LQF8 I3LQF8 | 9             | 0          | 2          | 0              | 0              | 0              | 1              | 2              | 18         | 0          | 25             | 0              | 0              | 0              | 1                 | 3          | 27.4%      | 0.0%           | 3.9%           | 0.0%           | 0.0%           | 0.0% | 4.5%  | 14.2% |
| tr I3LJ73 I3LJ73 | 6             | 4          | 5          | 0              | 0              | 0              | 1              | 1              | 11         | 7          | 18             | 0              | 0              | 0              | 2                 | 1          | 23.9%      | 14.4%          | 12.8%          | 0.0%           | 0.0%           | 0.0% | 4.5%  | 5.9%  |
| tr F1SLR1 F1SLR1 | 6             | 0          | 2          | 0              | 0              | 0              | 0              | 1              | 18         | 0          | 18             | 0              | 0              | 0              | 0                 | 1          | 40.7%      | 0.0%           | 10.5%          | 0.0%           | 0.0%           | 0.0% | 0.0%  | 9.9%  |
| tr I3L7B7 I3L7B7 | 2             | 3          | 0          | 0              | 0              | 0              | 0              | 0              | 5          | 13         | 0              | 0              | 0              | 0              |                   |            |            |                |                |                |                |      |       |       |

| Accession        | Sample# | Peptide Count |            |            |                |                |                |                | Spectral Count |            |            |                |                |                |                |                | Sequence Coverage |            |            |                |                |                |                |                |       |
|------------------|---------|---------------|------------|------------|----------------|----------------|----------------|----------------|----------------|------------|------------|----------------|----------------|----------------|----------------|----------------|-------------------|------------|------------|----------------|----------------|----------------|----------------|----------------|-------|
|                  |         | Whole Cell    | Whole Cell | Whole Cell | Cilia Fraction | Cilia Fraction | Cilia Fraction | Cilia Fraction | Whole Cell     | Whole Cell | Whole Cell | Cilia Fraction | Whole Cell        | Whole Cell | Whole Cell | Cilia Fraction |       |
|                  |         | 1             | 2          | 6          | 4              | 3              | 5              | 7              | 1              | 2          | 6          | 4              | 3              | 5              | 7              | 8              | 1                 | 2          | 6          | 4              | 3              | 5              | 7              | 8              |       |
| tr F1SG38 F1SG38 |         | 7             | 3          | 4          | 0              | 0              | 0              | 1              | 2              | 13         | 4          | 15             | 0              | 0              | 0              | 2              | 6                 | 25.9%      | 6.0%       | 11.0%          | 0.0%           | 0.0%           | 0.0%           | 4.8%           | 12.0% |
| tr F2Z5M9 F2Z5M9 |         | 6             | 0          | 1          | 0              | 0              | 0              | 0              | 1              | 17         | 0          | 4              | 0              | 0              | 0              | 0              | 5                 | 23.2%      | 0.0%       | 4.4%           | 0.0%           | 0.0%           | 0.0%           | 0.0%           | 3.8%  |
| tr I3LLE6 I3LLE6 |         | 5             | 2          | 2          | 0              | 0              | 0              | 1              | 1              | 14         | 3          | 16             | 0              | 0              | 0              | 3              | 4                 | 24.6%      | 10.6%      | 7.6%           | 0.0%           | 0.0%           | 0.0%           | 7.0%           | 3.6%  |
| tr F1SU52 F1SU52 |         | 8             | 2          | 5          | 0              | 0              | 0              | 2              | 3              | 13         | 4          | 60             | 0              | 0              | 0              | 8              | 6                 | 35.8%      | 10.2%      | 22.4%          | 0.0%           | 0.0%           | 0.0%           | 11.5%          | 16.3% |
| Q95274           |         | 7             | 3          | 11         | 0              | 0              | 0              | 2              | 4              | 14         | 3          | 181            | 0              | 0              | 0              | 8              | 26                | 61.4%      | 45.5%      | 79.5%          | 0.0%           | 0.0%           | 0.0%           | 43.2%          | 45.5% |
| tr F1RY8 F1RY8   |         | 8             | 2          | 2          | 0              | 0              | 0              | 0              | 1              | 15         | 2          | 13             | 0              | 0              | 0              | 0              | 2                 | 31.4%      | 10.9%      | 11.2%          | 0.0%           | 0.0%           | 0.0%           | 0.0%           | 8.1%  |
| tr F1SUD6 F1SUD6 |         | 7             | 0          | 5          | 0              | 0              | 0              | 0              | 1              | 17         | 0          | 8              | 0              | 0              | 0              | 0              | 1                 | 14.0%      | 0.0%       | 8.4%           | 0.0%           | 0.0%           | 0.0%           | 0.0%           | 2.7%  |
| tr F1SDC7 F1SDC7 |         | 8             | 3          | 4          | 0              | 0              | 0              | 0              | 1              | 12         | 5          | 23             | 0              | 0              | 0              | 0              | 1                 | 21.0%      | 11.5%      | 9.2%           | 0.0%           | 0.0%           | 0.0%           | 0.0%           | 3.1%  |
| tr I3LGE3 I3LGE3 |         | 2             | 1          | 0          | 0              | 0              | 0              | 0              | 0              | 3          | 14         | 0              | 0              | 0              | 0              | 0              | 0                 | 34.3%      | 11.1%      | 0.0%           | 0.0%           | 0.0%           | 0.0%           | 0.0%           | 0.0%  |
| tr I3LAL7 I3LAL7 |         | 3             | 3          | 0          | 0              | 0              | 0              | 0              | 0              | 6          | 11         | 0              | 0              | 0              | 0              | 0              | 0                 | 10.3%      | 8.9%       | 0.0%           | 0.0%           | 0.0%           | 0.0%           | 0.0%           | 0.0%  |
| tr I3LF70 I3LF70 | 10      | 1             | 0          | 0          | 0              | 0              | 0              | 0              | 0              | 15         | 2          | 0              | 0              | 0              | 0              | 0              | 0                 | 5.1%       | 0.5%       | 0.0%           | 0.0%           | 0.0%           | 0.0%           | 0.0%           | 0.0%  |
| tr F1RN43 F1RN43 |         | 2             | 6          | 0          | 0              | 0              | 0              | 0              | 0              | 2          | 15         | 0              | 0              | 0              | 0              | 0              | 0                 | 3.8%       | 7.1%       | 0.0%           | 0.0%           | 0.0%           | 0.0%           | 0.0%           | 0.0%  |
| tr F1SP73 F1SP73 |         | 6             | 2          | 1          | 0              | 0              | 0              | 0              | 0              | 8          | 9          | 1              | 0              | 0              | 0              | 0              | 0                 | 10.4%      | 1.7%       | 1.3%           | 0.0%           | 0.0%           | 0.0%           | 0.0%           | 0.0%  |
| P68211           |         | 3             | 3          | 1          | 0              | 0              | 0              | 0              | 0              | 4          | 13         | 1              | 0              | 0              | 0              | 0              | 0                 | 27.3%      | 14.9%      | 9.1%           | 0.0%           | 0.0%           | 0.0%           | 0.0%           | 0.0%  |
| tr F1RSH0 F1RSH0 |         | 6             | 1          | 1          | 0              | 0              | 0              | 0              | 0              | 10         | 7          | 1              | 0              | 0              | 0              | 0              | 0                 | 25.0%      | 4.4%       | 4.4%           | 0.0%           | 0.0%           | 0.0%           | 0.0%           | 0.0%  |
| tr F1SDG5 F1SDG5 |         | 5             | 1          | 1          | 0              | 0              | 0              | 0              | 0              | 5          | 12         | 2              | 0              | 0              | 0              | 0              | 0                 | 8.9%       | 1.9%       | 4.7%           | 0.0%           | 0.0%           | 0.0%           | 0.0%           | 0.0%  |
| tr F1SSZ2 F1SSZ2 |         | 2             | 3          | 2          | 0              | 0              | 0              | 0              | 0              | 6          | 11         | 6              | 0              | 0              | 0              | 0              | 0                 | 2.1%       | 2.0%       | 1.1%           | 0.0%           | 0.0%           | 0.0%           | 0.0%           | 0.0%  |
| tr F1RIM3 F1RIM3 |         | 2             | 3          | 2          | 0              | 0              | 0              | 0              | 0              | 6          | 11         | 6              | 0              | 0              | 0              | 0              | 0                 | 2.0%       | 1.9%       | 1.1%           | 0.0%           | 0.0%           | 0.0%           | 0.0%           | 0.0%  |
| tr F1SG42 F1SG42 |         | 5             | 3          | 1          | 0              | 0              | 0              | 0              | 0              | 7          | 10         | 6              | 0              | 0              | 0              | 0              | 0                 | 12.6%      | 4.1%       | 3.6%           | 0.0%           | 0.0%           | 0.0%           | 0.0%           | 0.0%  |
| tr F1SG41 F1SG41 |         | 5             | 3          | 1          | 0              | 0              | 0              | 0              | 0              | 7          | 10         | 6              | 0              | 0              | 0              | 0              | 0                 | 12.6%      | 4.1%       | 3.6%           | 0.0%           | 0.0%           | 0.0%           | 0.0%           | 0.0%  |
| tr F1SS77 F1SS77 |         | 3             | 3          | 2          | 0              | 0              | 0              | 0              | 0              | 4          | 13         | 6              | 0              | 0              | 0              | 0              | 0                 | 29.2%      | 15.9%      | 20.4%          | 0.0%           | 0.0%           | 0.0%           | 0.0%           | 0.0%  |
| tr I3LJ05 I3LJ05 |         | 7             | 0          | 3          | 0              | 0              | 0              | 0              | 0              | 17         | 0          | 7              | 0              | 0              | 0              | 0              | 0                 | 32.0%      | 0.0%       | 11.6%          | 0.0%           | 0.0%           | 0.0%           | 0.0%           | 0.0%  |
| Q6QAT1           |         | 6             | 1          | 2          | 0              | 0              | 0              | 0              | 0              | 14         | 3          | 7              | 0              | 0              | 0              | 0              | 0                 | 40.6%      | 17.4%      | 23.2%          | 0.0%           | 0.0%           | 0.0%           | 0.0%           | 0.0%  |
| tr F1SEX5 F1SEX5 |         | 5             | 3          | 3          | 0              | 0              | 0              | 0              | 0              | 6          | 11         | 10             | 0              | 0              | 0              | 0              | 0                 | 9.0%       | 3.8%       | 5.5%           | 0.0%           | 0.0%           | 0.0%           | 0.0%           | 0.0%  |
| P79274           | 12      | 0             | 5          | 0          | 0              | 0              | 0              | 0              | 0              | 17         | 0          | 19             | 0              | 0              | 0              | 0              | 0                 | 26.3%      | 0.0%       | 15.6%          | 0.0%           | 0.0%           | 0.0%           | 0.0%           | 0.0%  |
| tr I3L757 I3L757 |         | 5             | 1          | 4          | 0              | 0              | 0              | 0              | 0              | 16         | 1          | 24             | 0              | 0              | 0              | 0              | 0                 | 34.2%      | 4.4%       | 13.1%          | 0.0%           | 0.0%           | 0.0%           | 0.0%           | 0.0%  |
| tr F1SMS8 F1SMS8 |         | 6             | 0          | 2          | 0              | 0              | 0              | 1              | 6              | 16         | 0          | 11             | 0              | 0              | 0              | 63             | 83                | 24.6%      | 0.0%       | 8.5%           | 0.0%           | 0.0%           | 0.0%           | 6.2%           | 18.4% |
| tr F1SMQ1 F1SMQ1 |         | 7             | 2          | 3          | 0              | 0              | 0              | 3              | 3              | 12         | 4          | 21             | 0              | 0              | 0              | 67             | 48                | 20.2%      | 19.3%      | 16.0%          | 0.0%           | 0.0%           | 0.0%           | 19.3%          | 19.3% |
| tr I3LQ28 I3LQ28 |         | 4             | 1          | 5          | 0              | 0              | 0              | 1              | 1              | 14         | 2          | 17             | 0              | 0              | 0              | 46             | 1                 | 26.8%      | 6.3%       | 28.4%          | 0.0%           | 0.0%           | 0.0%           | 6.3%           | 6.3%  |
| tr F2Z5T3 F2Z5T3 |         | 4             | 1          | 5          | 0              | 0              | 0              | 1              | 1              | 14         | 2          | 17             | 0              | 0              | 0              | 46             | 1                 | 26.7%      | 6.3%       | 28.3%          | 0.0%           | 0.0%           | 0.0%           | 6.3%           | 6.3%  |
| tr I3LCR4 I3LCR4 |         | 2             | 2          | 3          | 0              | 0              | 0              | 0              | 2              | 4          | 12         | 11             | 0              | 0              | 0              | 0              | 27                | 42.9%      | 27.3%      | 27.3%          | 0.0%           | 0.0%           | 0.0%           | 0.0%           | 27.3% |
| Q29290           |         | 2             | 2          | 4          | 0              | 0              | 0              | 0              | 2              | 4          | 12         | 14             | 0              | 0              | 0              | 0              | 27                | 33.7%      | 21.4%      | 40.8%          | 0.0%           | 0.0%           | 0.0%           | 0.0%           | 21.4% |
| tr I3LGJ5 I3LGJ5 |         | 5             | 2          | 8          | 0              | 0              | 0              | 1              | 8              | 9          | 7          | 25             | 0              | 0              | 0              | 1              | 18                | 7.6%       | 2.1%       | 7.7%           | 0.0%           | 0.0%           | 0.0%           | 0.9%           | 12.0% |
| Q8MIK9           |         | 6             | 0          | 1          | 0              | 0              | 0              | 1              | 3              | 16         | 0          | 4              | 0              | 0              | 0              | 3              | 6                 | 42.2%      | 0.0%       | 16.3%          | 0.0%           | 0.0%           | 0.0%           | 8.8%           | 32.0% |
| tr I3LB68 I3LB68 |         | 6             | 3          | 1          | 0              | 0              | 0              | 3              | 1              | 11         | 5          | 24             | 0              | 0              | 0              | 12             | 2                 | 12.3%      | 12.8%      | 3.9%           | 0.0%           | 0.0%           | 0.0%           | 10.3%          | 3.9%  |
| tr I3LVJ7 I3LVJ7 |         | 7             | 4          | 4          | 0              | 0              | 0              | 1              | 2              | 11         | 5          | 30             | 0              | 0              | 0              | 2              | 10                | 33.3%      | 23.1%      | 16.7%          | 0.0%           | 0.0%           | 0.0%           | 6.9%           | 14.8% |
| tr F1SU97 F1SU97 |         | 7             | 0          | 2          | 0              | 0              | 0              | 0              | 2              | 16         | 0          | 7              | 0              | 0              | 0              | 0              | 6                 | 26.3%      | 0.0%       | 4.0%           | 0.0%           | 0.0%           | 0.0%           | 0.0%           | 8.4%  |
| tr I3L7T8 I3L7T8 |         | 4             | 1          | 2          | 0              | 0              | 0              | 1              | 2              | 12         | 4          | 17             | 0              | 0              | 0              | 2              | 5                 | 40.2%      | 13.4%      | 19.6%          | 0.0%           | 0.0%           | 0.0%           | 13.4%          | 17.5% |
| tr F1RPD2 F1RPD2 | 10      | 1             | 6          | 0          | 0              | 0              | 0              | 0              | 4              | 15         | 1          | 30             | 0              | 0              | 0              | 0              | 9                 | 36.6%      | 3.3%       | 17.9%          | 0.0%           | 0.0%           | 0.0%           | 0.0%           | 15.3% |
| tr F1SU53 F1SU53 |         | 8             | 0          | 4          | 0              | 0              | 0              | 1              | 4              | 16         | 0          | 26             | 0              | 0              | 0              | 1              | 6                 | 11.4%      | 0.0%       | 4.7%           | 0.0%           | 0.0%           | 0.0%           | 1.7%           | 6.4%  |
| tr F1STM9 F1STM9 |         | 6             | 0          | 1          | 0              | 0              | 0              | 0              | 1              | 16         | 0          | 3              | 0              | 0              | 0              | 0              | 3                 | 35.9%      | 0.0%       | 7.4%           | 0.0%           | 0.0%           | 0.0%           | 0.0%           | 5.2%  |
| tr K7GSX0 K7GSX0 |         | 5             | 4          | 2          | 0              | 0              | 0              | 1              | 1              | 11         | 5          | 12             | 0              | 0              | 0              | 1              | 3                 | 5.2%       | 3.0%       | 2.5%           | 0.0%           | 0.0%           | 0.0%           | 0.8%           | 1.3%  |
| tr F1RZU3 F1RZU3 |         | 5             | 4          | 2          | 0              | 0              | 0              | 1              | 1              | 11         | 5          | 12             | 0              | 0              | 0              | 1              | 3                 | 5.1%       | 2.9%       | 2.5%           | 0.0%           | 0.0%           | 0.0%           | 0.8%           | 1.3%  |
| P14287           | 11      | 0             | 6          | 0          | 0              | 0              | 0              | 2              | 0              | 16         | 0          | 40             | 0              | 0              | 0              | 7              | 0                 | 43.6%      | 0.0%       | 25.7%          | 0.0%           | 0.0%           | 0.0%           | 5.3%           | 0.0%  |
| tr F1STK8 F1STK8 |         | 7             | 1          | 0          | 0              | 0              | 0              | 0              | 2              | 15         | 1          | 0              | 0              | 0              | 0              | 0              | 2                 | 32.2%      | 4.5%       | 0.0%           | 0.0%           | 0.0%           | 0.0%           | 0.0%           | 17.4% |
| tr K7GNY9 K7GNY9 |         | 6             | 0          | 0          | 0              | 0              | 0              | 1              | 0              | 16         | 0          | 0              | 0              | 0              | 0              | 2              | 0                 | 44.7%      | 0.0%       | 0.0%           | 0.0%           | 0.0%           | 0.0%           | 12.7%          | 0.0%  |
| tr F1RHJ2 F1RHJ2 |         | 6             | 2          | 17         | 0              | 0              | 0              | 1              | 3              | 13         | 3          | 102            | 0              | 0              | 0              | 2              | 11                | 28.8%      | 11.1%      | 63.0%          | 0.0%           | 0.0%           | 0.0%           | 4.5%           | 28.8% |
| P00571           |         | 5             | 1          | 4          | 0              | 0              | 0              | 1              | 2              | 12         | 4          | 39             | 0              | 0              | 0              | 1              | 5                 | 35.6%      | 6.2%       | 24.7%          | 0.0%           | 0.0%           | 0.0%           | 7.2%           | 17.5% |
| tr F1SMG3 F1SMG3 |         | 4             | 1          | 2          | 0              | 0              | 0              | 0              | 1              | 6          | 10         | 11             | 0              | 0              | 0              | 0              | 2                 | 7.5%       | 1.0%       | 3.6%           | 0.0%           | 0.0%           | 0.0%           | 0.0%           | 3.5%  |
| tr F1RMA3 F1RMA3 | 10      | 2             | 5          | 0          | 0              | 0              | 0              | 0              | 1              | 12         | 4          | 31             | 0              | 0              | 0              | 0              | 3                 | 16.7%      | 2.2%       | 10.5%          | 0.0%           | 0.0%           | 0.0%           | 0.0%           | 3.4%  |
| tr F1RNZ2 F1RNZ2 |         | 4             | 2          | 1          | 0              | 0              | 0              | 0              | 1              | 11         | 5          | 4              | 0              | 0              | 0              | 0              | 1                 | 33.9%      | 25.2%      | 10.4%          | 0.0%           | 0.0%           | 0.0%           | 0.0%           | 19.1% |
| tr F1SPES F1SPES |         | 0             | 2          | 0          | 0              | 0              | 0              | 0              | 0              | 0          | 16         | 0              | 0              | 0              | 0              | 0              | 0                 | 0.0%       | 14.5%      | 0.0%           | 0.0%           | 0.0%           | 0.0%           | 0.0%           | 0.0%  |
| tr I3LNN3 I3LNN3 |         | 9             | 1          | 0          | 0              | 0              | 0              | 0              | 0              | 14         | 2          | 0              | 0              | 0              | 0              | 0              | 0                 | 4.6%       | 0.5%       | 0.0%           | 0.0%           | 0.0%           | 0.0%           | 0.0%           | 0.0%  |
| tr F1SU36 F1SU36 |         | 7             | 2          | 0          | 0              | 0              | 0              | 0              | 0              | 11         | 5          | 0              | 0              | 0              | 0              | 0              | 0                 | 14.5%      | 4.3%       | 0.0%           | 0.0%           | 0.0%           | 0.0%           | 0.0%           | 0.0%  |
| tr F1SV27 F1SV27 |         | 1             | 1          | 0          | 0              | 0              | 0              | 0              | 0              | 1          | 15         | 0              | 0              | 0              | 0              | 0              | 0                 | 3.6%       | 3.6%       | 0.0%           | 0.0%           | 0.0%           | 0.0%           | 0.0%           | 0.0%  |
| tr D7RA28 D7RA28 |         | 0             | 2          | 0          | 0              | 0              | 0              | 0              | 0              | 0          | 16         | 0              | 0              | 0              | 0              | 0              | 0                 | 0.0%       | 14.5%      | 0.0%           | 0.0%           | 0.0%           | 0.0%           | 0.0%           | 0.0%  |
| tr F1SI34 F1SI34 |         | 8             | 1          | 1          | 0              | 0              | 0              | 0              | 0              | 14         | 2          | 2              | 0              | 0              | 0              | 0              | 0                 | 21.1%      | 1.8%       | 2.5%           | 0.0%           | 0.0%           | 0.0%           | 0.0%           | 0.0%  |
| tr F1RX50 F1RX50 |         | 8             | 2          | 3          | 0              | 0              | 0              | 0              | 0              | 13         | 3          | 4              | 0              | 0              | 0              | 0              | 0                 | 11.3%      | 5.9%       | 8.8%           | 0.0%           | 0.0%           | 0.0%           | 0.0%           | 0.0%  |
| tr F1SPF3 F1SPF3 |         | 8             | 3          | 3          | 0              | 0              | 0              | 0              | 0              | 12         | 4          | 5              | 0              | 0              | 0              | 0              | 0                 | 11.4%      | 3.5%       | 5.2%           | 0.0%           | 0.0%           | 0.0%           | 0.0%           | 0.0%  |
| tr I3LVP1 I3LVP1 |         | 4             | 3          | 4          | 0              | 0              | 0              | 0              | 0              | 9          | 7          | 8              | 0              | 0              | 0              | 0              | 0                 | 33.3%      | 39.0%      | 32.4%          | 0.0%           | 0.0%           | 0.0%           | 0.0%           | 0.0%  |
| tr F1S297 F1S297 |         | 9             | 1          | 1          | 0              | 0              | 0              | 0              | 0              | 15         | 1          | 9              | 0              | 0              | 0              | 0              | 0                 | 25.5%      | 3.3%       | 7.9%           | 0.0%           | 0.0%           | 0.0%           | 0.0%           | 0.0%  |
| tr F1S325 F1S325 |         | 5             | 2          | 1          | 0              | 0              | 0              | 0              | 0              | 6          | 10         | 11             | 0              | 0              | 0              | 0              | 0                 | 35.4%      | 6.5%       | 9.0%           | 0.0%           | 0.0%           | 0.0%           | 0.0            |       |

| Sample#                  | Peptide Count |            |            |                |                |                |                | Spectral Count |            |            |                |                |                |                | Sequence Coverage |            |            |                |                |                |                |      |       |       |
|--------------------------|---------------|------------|------------|----------------|----------------|----------------|----------------|----------------|------------|------------|----------------|----------------|----------------|----------------|-------------------|------------|------------|----------------|----------------|----------------|----------------|------|-------|-------|
|                          | Whole Cell    | Whole Cell | Whole Cell | Cilia Fraction | Cilia Fraction | Cilia Fraction | Cilia Fraction | Whole Cell     | Whole Cell | Whole Cell | Cilia Fraction | Cilia Fraction | Cilia Fraction | Cilia Fraction | Whole Cell        | Whole Cell | Whole Cell | Cilia Fraction | Cilia Fraction | Cilia Fraction | Cilia Fraction |      |       |       |
|                          | 1             | 2          | 6          | 4              | 3              | 5              | 7              | 8              | 1          | 2          | 6              | 4              | 3              | 5              | 7                 | 8          | 1          | 2              | 6              | 4              | 3              | 5    | 7     | 8     |
| Accession                |               |            |            |                |                |                |                |                |            |            |                |                |                |                |                   |            |            |                |                |                |                |      |       |       |
| P81045                   | 5             | 1          | 0          | 0              | 0              | 0              | 0              | 0              | 9          | 6          | 0              | 0              | 0              | 0              | 0                 | 0          | 64.5%      | 25.8%          | 0.0%           | 0.0%           | 0.0%           | 0.0% | 0.0%  | 0.0%  |
| Reverse_tr F1SRM1 F1SRM1 | 0             | 1          | 0          | 0              | 0              | 0              | 0              | 0              | 0          | 15         | 0              | 0              | 0              | 0              | 0                 | 0          | 0.0%       | 0.3%           | 0.0%           | 0.0%           | 0.0%           | 0.0% | 0.0%  | 0.0%  |
| tr I3LP43 I3LP43         | 7             | 3          | 0          | 0              | 0              | 0              | 0              | 0              | 9          | 6          | 0              | 0              | 0              | 0              | 0                 | 0          | 12.6%      | 3.9%           | 0.0%           | 0.0%           | 0.0%           | 0.0% | 0.0%  | 0.0%  |
| tr I3LFW7 I3LFW7         | 3             | 4          | 0          | 0              | 0              | 0              | 0              | 0              | 5          | 10         | 0              | 0              | 0              | 0              | 0                 | 0          | 18.5%      | 17.4%          | 0.0%           | 0.0%           | 0.0%           | 0.0% | 0.0%  | 0.0%  |
| tr F1RJM3 F1RJM3         | 7             | 3          | 0          | 0              | 0              | 0              | 0              | 0              | 9          | 6          | 0              | 0              | 0              | 0              | 0                 | 0          | 12.6%      | 3.9%           | 0.0%           | 0.0%           | 0.0%           | 0.0% | 0.0%  | 0.0%  |
| tr D2XUP7 D2XUP7         | 5             | 1          | 0          | 0              | 0              | 0              | 0              | 0              | 9          | 6          | 0              | 0              | 0              | 0              | 0                 | 0          | 63.5%      | 25.4%          | 0.0%           | 0.0%           | 0.0%           | 0.0% | 0.0%  | 0.0%  |
| tr I3LCW3 I3LCW3         | 10            | 1          | 2          | 0              | 0              | 0              | 0              | 0              | 14         | 1          | 3              | 0              | 0              | 0              | 0                 | 0          | 4.8%       | 0.5%           | 1.2%           | 0.0%           | 0.0%           | 0.0% | 0.0%  | 0.0%  |
| tr K7GKS8 K7GKS8         | 5             | 1          | 1          | 0              | 0              | 0              | 0              | 0              | 11         | 4          | 8              | 0              | 0              | 0              | 0                 | 0          | 10.3%      | 1.9%           | 2.3%           | 0.0%           | 0.0%           | 0.0% | 0.0%  | 0.0%  |
| tr F1SVC4 F1SVC4         | 5             | 1          | 1          | 0              | 0              | 0              | 0              | 0              | 11         | 4          | 8              | 0              | 0              | 0              | 0                 | 0          | 10.3%      | 1.9%           | 2.3%           | 0.0%           | 0.0%           | 0.0% | 0.0%  | 0.0%  |
| tr F1SI13 F1SI13         | 7             | 2          | 1          | 0              | 0              | 0              | 0              | 0              | 8          | 7          | 12             | 0              | 0              | 0              | 0                 | 0          | 51.2%      | 7.4%           | 10.7%          | 0.0%           | 0.0%           | 0.0% | 0.0%  | 0.0%  |
| tr F1SU05 F1SU05         | 5             | 1          | 3          | 0              | 0              | 0              | 0              | 0              | 8          | 7          | 14             | 0              | 0              | 0              | 0                 | 0          | 8.8%       | 1.3%           | 4.7%           | 0.0%           | 0.0%           | 0.0% | 0.0%  | 0.0%  |
| tr I3LSP1 I3LSP1         | 6             | 2          | 2          | 0              | 0              | 0              | 0              | 0              | 9          | 6          | 28             | 0              | 0              | 0              | 0                 | 0          | 11.7%      | 4.4%           | 8.2%           | 0.0%           | 0.0%           | 0.0% | 0.0%  | 0.0%  |
| tr F1S479 F1S479         | 3             | 1          | 0          | 0              | 0              | 0              | 1              | 1              | 4          | 10         | 0              | 0              | 0              | 0              | 6                 | 3          | 16.2%      | 5.9%           | 0.0%           | 0.0%           | 0.0%           | 0.0% | 5.5%  | 5.5%  |
| tr B2CCY7 B2CCY7         | 8             | 3          | 6          | 0              | 0              | 1              | 3              | 11             | 3          | 42         | 0              | 0              | 0              | 0              | 8                 | 21         | 13.9%      | 5.6%           | 14.3%          | 0.0%           | 0.0%           | 0.0% | 6.3%  | 22.6% |
| tr F1RR44 F1RR44         | 7             | 0          | 1          | 0              | 0              | 0              | 0              | 2              | 14         | 0          | 3              | 0              | 0              | 0              | 0                 | 8          | 27.7%      | 0.0%           | 3.6%           | 0.0%           | 0.0%           | 0.0% | 0.0%  | 14.3% |
| tr F2Z509 F2Z509         | 7             | 1          | 1          | 0              | 0              | 0              | 0              | 2              | 13         | 1          | 2              | 0              | 0              | 0              | 0                 | 6          | 25.7%      | 2.5%           | 2.5%           | 0.0%           | 0.0%           | 0.0% | 0.0%  | 9.8%  |
| tr F1SNK3 F1SNK3         | 7             | 1          | 3          | 0              | 0              | 0              | 1              | 2              | 10         | 4          | 13             | 0              | 0              | 0              | 3                 | 7          | 38.4%      | 3.6%           | 12.5%          | 0.0%           | 0.0%           | 0.0% | 6.0%  | 6.0%  |
| tr I3LS26 I3LS26         | 6             | 0          | 2          | 0              | 0              | 0              | 0              | 2              | 14         | 0          | 7              | 0              | 0              | 0              | 0                 | 6          | 22.4%      | 0.0%           | 4.0%           | 0.0%           | 0.0%           | 0.0% | 0.0%  | 8.3%  |
| tr F1S0W9 F1S0W9         | 6             | 1          | 2          | 0              | 0              | 0              | 0              | 2              | 6          | 8          | 8              | 0              | 0              | 0              | 0                 | 3          | 4.7%       | 0.9%           | 1.7%           | 0.0%           | 0.0%           | 0.0% | 0.0%  | 2.8%  |
| tr F1S2G3 F1S2G3         | 9             | 0          | 2          | 0              | 0              | 0              | 1              | 1              | 14         | 0          | 9              | 0              | 0              | 0              | 2                 | 1          | 50.0%      | 0.0%           | 12.5%          | 0.0%           | 0.0%           | 0.0% | 12.5% | 26.9% |
| tr I3LTV1 I3LTV1         | 2             | 2          | 2          | 0              | 0              | 0              | 0              | 2              | 6          | 8          | 16             | 0              | 0              | 0              | 0                 | 3          | 4.2%       | 4.2%           | 2.2%           | 0.0%           | 0.0%           | 0.0% | 0.0%  | 4.2%  |
| tr F1SR94 F1SR94         | 2             | 2          | 2          | 0              | 0              | 0              | 0              | 2              | 6          | 8          | 16             | 0              | 0              | 0              | 0                 | 3          | 7.3%       | 7.3%           | 3.9%           | 0.0%           | 0.0%           | 0.0% | 0.0%  | 7.3%  |
| tr F1RGC9 F1RGC9         | 7             | 2          | 5          | 0              | 0              | 0              | 0              | 2              | 12         | 2          | 43             | 0              | 0              | 0              | 0                 | 4          | 26.1%      | 5.6%           | 15.7%          | 0.0%           | 0.0%           | 0.0% | 0.0%  | 7.2%  |
| Q29090                   | 7             | 1          | 1          | 0              | 0              | 0              | 0              | 1              | 13         | 1          | 2              | 0              | 0              | 0              | 0                 | 1          | 27.0%      | 2.6%           | 2.6%           | 0.0%           | 0.0%           | 0.0% | 0.0%  | 3.3%  |
| tr F1S296 F1S296         | 4             | 3          | 3          | 0              | 0              | 0              | 0              | 2              | 6          | 8          | 213            | 0              | 0              | 0              | 0                 | 7          | 25.0%      | 19.8%          | 18.6%          | 0.0%           | 0.0%           | 0.0% | 0.0%  | 11.0% |
| tr K7GM72 K7GM72         | 4             | 3          | 3          | 0              | 0              | 0              | 0              | 2              | 6          | 8          | 213            | 0              | 0              | 0              | 0                 | 7          | 26.4%      | 20.9%          | 19.6%          | 0.0%           | 0.0%           | 0.0% | 0.0%  | 11.7% |
| tr K7GK90 K7GK90         | 4             | 3          | 3          | 0              | 0              | 0              | 0              | 2              | 6          | 8          | 213            | 0              | 0              | 0              | 0                 | 7          | 24.9%      | 19.7%          | 18.5%          | 0.0%           | 0.0%           | 0.0% | 0.0%  | 11.0% |
| tr F1S084 F1S084         | 5             | 2          | 0          | 0              | 0              | 0              | 0              | 0              | 9          | 5          | 0              | 0              | 0              | 0              | 0                 | 0          | 22.7%      | 5.5%           | 0.0%           | 0.0%           | 0.0%           | 0.0% | 0.0%  | 0.0%  |
| tr F1SAK7 F1SAK7         | 4             | 3          | 0          | 0              | 0              | 0              | 0              | 0              | 7          | 7          | 0              | 0              | 0              | 0              | 0                 | 0          | 7.2%       | 2.4%           | 0.0%           | 0.0%           | 0.0%           | 0.0% | 0.0%  | 0.0%  |
| tr K7GT08 K7GT08         | 1             | 2          | 0          | 0              | 0              | 0              | 0              | 0              | 1          | 13         | 0              | 0              | 0              | 0              | 0                 | 0          | 28.6%      | 28.6%          | 0.0%           | 0.0%           | 0.0%           | 0.0% | 0.0%  | 0.0%  |
| tr F1RKQ9 F1RKQ9         | 4             | 1          | 0          | 0              | 0              | 0              | 0              | 0              | 9          | 5          | 0              | 0              | 0              | 0              | 0                 | 0          | 28.9%      | 8.4%           | 0.0%           | 0.0%           | 0.0%           | 0.0% | 0.0%  | 0.0%  |
| tr F1S403 F1S403         | 1             | 2          | 0          | 0              | 0              | 0              | 0              | 0              | 1          | 13         | 0              | 0              | 0              | 0              | 0                 | 0          | 3.7%       | 5.0%           | 0.0%           | 0.0%           | 0.0%           | 0.0% | 0.0%  | 0.0%  |
| tr K7GN10 K7GN10         | 1             | 2          | 0          | 0              | 0              | 0              | 0              | 0              | 1          | 13         | 0              | 0              | 0              | 0              | 0                 | 0          | 16.7%      | 16.7%          | 0.0%           | 0.0%           | 0.0%           | 0.0% | 0.0%  | 0.0%  |
| tr F1S851 F1S851         | 0             | 1          | 0          | 0              | 0              | 0              | 0              | 0              | 0          | 14         | 0              | 0              | 0              | 0              | 0                 | 0          | 0.0%       | 2.4%           | 0.0%           | 0.0%           | 0.0%           | 0.0% | 0.0%  | 0.0%  |
| tr I3LS69 I3LS69         | 2             | 2          | 0          | 0              | 0              | 0              | 0              | 0              | 2          | 12         | 0              | 0              | 0              | 0              | 0                 | 0          | 26.8%      | 26.8%          | 0.0%           | 0.0%           | 0.0%           | 0.0% | 0.0%  | 0.0%  |
| tr K7GP63 K7GP63         | 1             | 2          | 0          | 0              | 0              | 0              | 0              | 0              | 1          | 13         | 0              | 0              | 0              | 0              | 0                 | 0          | 19.6%      | 19.6%          | 0.0%           | 0.0%           | 0.0%           | 0.0% | 0.0%  | 0.0%  |
| tr F1SHL4 F1SHL4         | 2             | 1          | 0          | 0              | 0              | 0              | 0              | 0              | 11         | 3          | 0              | 0              | 0              | 0              | 0                 | 0          | 5.4%       | 2.9%           | 0.0%           | 0.0%           | 0.0%           | 0.0% | 0.0%  | 0.0%  |
| tr F1SQW1 F1SQW1         | 4             | 1          | 1          | 0              | 0              | 0              | 0              | 0              | 11         | 3          | 1              | 0              | 0              | 0              | 0                 | 0          | 53.1%      | 19.8%          | 11.1%          | 0.0%           | 0.0%           | 0.0% | 0.0%  | 0.0%  |
| tr F1RNI3 F1RNI3         | 3             | 1          | 1          | 0              | 0              | 0              | 0              | 0              | 3          | 11         | 1              | 0              | 0              | 0              | 0                 | 0          | 8.6%       | 3.8%           | 5.2%           | 0.0%           | 0.0%           | 0.0% | 0.0%  | 0.0%  |
| tr F1RPB7 F1RPB7         | 5             | 3          | 2          | 0              | 0              | 0              | 0              | 0              | 5          | 9          | 6              | 0              | 0              | 0              | 0                 | 0          | 19.0%      | 8.9%           | 6.4%           | 0.0%           | 0.0%           | 0.0% | 0.0%  | 0.0%  |
| tr I3LH3 I3LH3           | 4             | 1          | 2          | 0              | 0              | 0              | 0              | 0              | 7          | 7          | 6              | 0              | 0              | 0              | 0                 | 0          | 32.8%      | 8.6%           | 24.2%          | 0.0%           | 0.0%           | 0.0% | 0.0%  | 0.0%  |
| B3SP85                   | 8             | 0          | 1          | 0              | 0              | 0              | 0              | 0              | 14         | 0          | 6              | 0              | 0              | 0              | 0                 | 0          | 41.5%      | 0.0%           | 5.3%           | 0.0%           | 0.0%           | 0.0% | 0.0%  | 0.0%  |
| tr I3LNL7 I3LNL7         | 7             | 0          | 3          | 0              | 0              | 0              | 0              | 0              | 14         | 0          | 12             | 0              | 0              | 0              | 0                 | 0          | 10.0%      | 0.0%           | 8.7%           | 0.0%           | 0.0%           | 0.0% | 0.0%  | 0.0%  |
| tr F1SQ00 F1SQ00         | 6             | 3          | 4          | 0              | 0              | 0              | 0              | 0              | 7          | 7          | 19             | 0              | 0              | 0              | 0                 | 0          | 21.0%      | 8.0%           | 9.8%           | 0.0%           | 0.0%           | 0.0% | 0.0%  | 0.0%  |
| tr F1RWB7 F1RWB7         | 6             | 0          | 2          | 0              | 0              | 0              | 0              | 0              | 14         | 0          | 25             | 0              | 0              | 0              | 0                 | 0          | 7.9%       | 0.0%           | 5.0%           | 0.0%           | 0.0%           | 0.0% | 0.0%  | 0.0%  |
| tr F1SND2 F1SND2         | 7             | 3          | 4          | 0              | 0              | 0              | 0              | 0              | 11         | 3          | 28             | 0              | 0              | 0              | 0                 | 0          | 22.5%      | 6.2%           | 12.2%          | 0.0%           | 0.0%           | 0.0% | 0.0%  | 0.0%  |
| tr I3LHM3 I3LHM3         | 7             | 2          | 7          | 0              | 0              | 0              | 0              | 0              | 11         | 3          | 29             | 0              | 0              | 0              | 0                 | 0          | 12.7%      | 2.8%           | 8.7%           | 0.0%           | 0.0%           | 0.0% | 0.0%  | 0.0%  |
| tr F1SDV7 F1SDV7         | 7             | 2          | 7          | 0              | 0              | 0              | 0              | 0              | 11         | 3          | 29             | 0              | 0              | 0              | 0                 | 0          | 13.5%      | 3.0%           | 9.2%           | 0.0%           | 0.0%           | 0.0% | 0.0%  | 0.0%  |
| tr F1SK95 F1SK95         | 7             | 3          | 8          | 0              | 0              | 0              | 0              | 0              | 10         | 4          | 44             | 0              | 0              | 0              | 0                 | 0          | 22.4%      | 10.4%          | 22.2%          | 0.0%           | 0.0%           | 0.0% | 0.0%  | 0.0%  |
| tr F1S854 F1S854         | 3             | 2          | 2          | 0              | 0              | 0              | 2              | 2              | 7          | 6          | 7              | 0              | 0              | 0              | 11                | 31         | 42.5%      | 45.0%          | 27.5%          | 0.0%           | 0.0%           | 0.0% | 57.5% | 60.0% |
| tr F1S2K3 F1S2K3         | 3             | 2          | 0          | 0              | 0              | 0              | 1              | 2              | 6          | 7          | 0              | 0              | 0              | 0              | 7                 | 14         | 44.9%      | 23.6%          | 0.0%           | 0.0%           | 0.0%           | 0.0% | 18.1% | 12.6% |
| tr F1SH60 F1SH60         | 3             | 0          | 1          | 0              | 0              | 0              | 2              | 2              | 13         | 0          | 1              | 0              | 0              | 0              | 8                 | 12         | 19.7%      | 0.0%           | 7.7%           | 0.0%           | 0.0%           | 0.0% | 12.0% | 12.0% |
| tr F1SIG7 F1SIG7         | 5             | 0          | 2          | 0              | 0              | 0              | 3              | 3              | 13         | 0          | 8              | 0              | 0              | 0              | 15                | 8          | 12.3%      | 0.0%           | 5.9%           | 0.0%           | 0.0%           | 0.0% | 10.4% | 13.0% |
| tr I3L700 I3L700         | 3             | 2          | 0          | 0              | 0              | 0              | 0              | 2              | 6          | 7          | 0              | 0              | 0              | 0              | 0                 | 14         | 44.5%      | 23.4%          | 0.0%           | 0.0%           | 0.0%           | 0.0% | 0.0%  | 12.5% |
| tr I3LR51 I3LR51         | 3             | 0          | 0          | 0              | 0              | 0              | 0              | 2              | 13         | 0          | 0              | 0              | 0              | 0              | 0                 | 13         | 26.6%      | 0.0%           | 0.0%           | 0.0%           | 0.0%           | 0.0% | 0.0%  | 12.1% |
| tr K7GMF2 K7GMF2         | 8             | 0          | 1          | 0              | 0              | 0              | 1              | 2              | 13         | 0          | 7              | 0              | 0              | 0              | 8                 | 7          | 54.3%      | 0.0%           | 16.3%          | 0.0%           | 0.0%           | 0.0% | 16.3% | 21.7% |
| tr F1S4U9 F1S4U9         | 8             | 1          | 1          | 0              | 0              | 0              | 1              | 2              | 11         | 2          | 3              | 0              | 0              | 0              | 6                 | 6          | 9.9%       | 1.2%           | 1.9%           | 0.0%           | 0.0%           | 0.0% | 2.4%  | 2.6%  |
| tr F1RRT3 F1RRT3         | 8             | 0          | 2          | 0              | 0              | 0              | 0              | 1              | 13         | 0          | 8              | 0              | 0              | 0              | 7                 | 7          | 26.5%      | 0.0%           | 12.7%          | 0.0%           | 0.0%           | 0.0% | 4.3%  | 11.4% |
| tr F1SIX7 F1SIX7         | 6             | 2          | 3          | 0              | 0              | 0              | 2              | 1              | 9          | 4          | 18             | 0              | 0              | 0              | 2                 | 12         | 24.6%      | 6.3%           | 10.3%          | 0.0%           | 0.0%           | 0.0% | 9.5%  | 4.6%  |
| tr F1SMN1 F1SMN1         | 9             | 0          | 12         | 0              | 0              | 0              | 1              | 4              | 13         | 0          | 91             | 0              | 0              | 0              | 17                | 23         | 39.9%      | 0.0%           | 33.0%          | 0.0%           | 0.0%           | 0.0% | 4.1%  | 21.7% |
| Q28960                   | 5             | 0          | 1          | 0              | 0              | 0              | 0              | 3              | 13         | 0          | 11             | 0              | 0              | 0              | 0                 | 9          | 15.2%      | 0.0%           | 4.2%           | 0.0%           | 0.0%           | 0.0% | 0.0%  | 15.9% |
| tr F2Z523 F2Z523         | 3             | 0          | 1          | 0              | 0              | 0              | 0              | 1              | 13         | 0          | 2              | 0              | 0              | 0              | 0                 | 5          | 19.2%      | 0.0%           | 6.6%           | 0.0%           | 0.0%           | 0.0% | 0.0%  | 7.9%  |
| tr F1RFV5 F1RFV5         | 5             | 0          | 0          | 0              | 0              | 0              | 0              | 1              | 13         | 0          | 0              | 0              | 0              | 0              | 0                 | 4          | 43.6%      |                |                |                |                |      |       |       |



| Sample#          | Peptide Count |            |            |                |                |                |                | Spectral Count |            |            |                |                |                |                | Sequence Coverage |            |            |                |                |                |                |      |       |       |
|------------------|---------------|------------|------------|----------------|----------------|----------------|----------------|----------------|------------|------------|----------------|----------------|----------------|----------------|-------------------|------------|------------|----------------|----------------|----------------|----------------|------|-------|-------|
|                  | Whole Cell    | Whole Cell | Whole Cell | Cilia Fraction | Cilia Fraction | Cilia Fraction | Cilia Fraction | Whole Cell     | Whole Cell | Whole Cell | Cilia Fraction | Cilia Fraction | Cilia Fraction | Cilia Fraction | Whole Cell        | Whole Cell | Whole Cell | Cilia Fraction | Cilia Fraction | Cilia Fraction | Cilia Fraction |      |       |       |
|                  | 1             | 2          | 6          | 4              | 3              | 5              | 7              | 8              | 1          | 2          | 6              | 4              | 3              | 5              | 7                 | 8          | 1          | 2              | 6              | 4              | 3              | 5    | 7     | 8     |
| Accession        |               |            |            |                |                |                |                |                |            |            |                |                |                |                |                   |            |            |                |                |                |                |      |       |       |
| tr F1S300 F1S300 | 7             | 1          | 5          | 0              | 0              | 0              | 0              | 0              | 9          | 3          | 12             | 0              | 0              | 0              | 0                 | 0          | 4.6%       | 0.8%           | 3.1%           | 0.0%           | 0.0%           | 0.0% | 0.0%  | 0.0%  |
| tr F1RHM9 F1RHM9 | 5             | 1          | 1          | 0              | 0              | 0              | 0              | 0              | 7          | 5          | 12             | 0              | 0              | 0              | 0                 | 0          | 12.4%      | 1.6%           | 5.5%           | 0.0%           | 0.0%           | 0.0% | 0.0%  | 0.0%  |
| tr I3LKF1 I3LKF1 | 6             | 2          | 5          | 0              | 0              | 0              | 0              | 0              | 7          | 5          | 33             | 0              | 0              | 0              | 0                 | 0          | 20.1%      | 16.0%          | 24.9%          | 0.0%           | 0.0%           | 0.0% | 0.0%  | 0.0%  |
| tr F1RJ01 F1RJ01 | 6             | 2          | 5          | 0              | 0              | 0              | 0              | 0              | 7          | 5          | 33             | 0              | 0              | 0              | 0                 | 0          | 16.3%      | 13.0%          | 20.2%          | 0.0%           | 0.0%           | 0.0% | 0.0%  | 0.0%  |
| tr K7GSE9 K7GSE9 | 6             | 0          | 6          | 0              | 0              | 0              | 0              | 0              | 12         | 0          | 58             | 0              | 0              | 0              | 0                 | 0          | 25.9%      | 0.0%           | 29.4%          | 0.0%           | 0.0%           | 0.0% | 0.0%  | 0.0%  |
| tr I3L638 I3L638 | 3             | 2          | 0          | 0              | 0              | 0              | 0              | 1              | 4          | 7          | 0              | 0              | 0              | 0              | 0                 | 10         | 7.2%       | 3.9%           | 0.0%           | 0.0%           | 0.0%           | 0.0% | 1.7%  | 0.0%  |
| tr I3L9F8 I3L9F8 | 3             | 2          | 0          | 0              | 0              | 0              | 0              | 1              | 4          | 7          | 0              | 0              | 0              | 0              | 0                 | 10         | 8.5%       | 4.7%           | 0.0%           | 0.0%           | 0.0%           | 0.0% | 2.1%  | 0.0%  |
| P48819           | 3             | 2          | 0          | 0              | 0              | 0              | 0              | 1              | 4          | 7          | 0              | 0              | 0              | 0              | 0                 | 10         | 7.2%       | 3.9%           | 0.0%           | 0.0%           | 0.0%           | 0.0% | 1.7%  | 0.0%  |
| tr I3LP50 I3LP50 | 3             | 2          | 0          | 0              | 0              | 0              | 0              | 1              | 4          | 7          | 0              | 0              | 0              | 0              | 0                 | 10         | 7.2%       | 3.9%           | 0.0%           | 0.0%           | 0.0%           | 0.0% | 1.7%  | 0.0%  |
| tr I3L998 I3L998 | 3             | 2          | 0          | 0              | 0              | 0              | 0              | 1              | 4          | 7          | 0              | 0              | 0              | 0              | 0                 | 10         | 8.5%       | 4.7%           | 0.0%           | 0.0%           | 0.0%           | 0.0% | 2.1%  | 0.0%  |
| tr F1RWW4 F1RWW4 | 4             | 4          | 1          | 0              | 0              | 0              | 0              | 2              | 6          | 5          | 1              | 0              | 0              | 0              | 0                 | 9          | 6.5%       | 7.0%           | 2.0%           | 0.0%           | 0.0%           | 0.0% | 5.6%  | 0.0%  |
| tr F1S0N6 F1S0N6 | 4             | 0          | 0          | 0              | 0              | 0              | 1              | 2              | 11         | 0          | 0              | 0              | 0              | 0              | 1                 | 5          | 12.6%      | 0.0%           | 0.0%           | 0.0%           | 0.0%           | 0.0% | 3.6%  | 6.9%  |
| tr I3LSV7 I3LSV7 | 4             | 0          | 3          | 0              | 0              | 0              | 0              | 2              | 11         | 0          | 8              | 0              | 0              | 0              | 0                 | 9          | 43.0%      | 0.0%           | 18.3%          | 0.0%           | 0.0%           | 0.0% | 35.2% | 0.0%  |
| tr F1SKH3 F1SKH3 | 7             | 0          | 0          | 0              | 0              | 0              | 0              | 1              | 11         | 0          | 0              | 0              | 0              | 0              | 0                 | 5          | 6.2%       | 0.0%           | 0.0%           | 0.0%           | 0.0%           | 0.0% | 1.4%  | 0.0%  |
| tr B5APU8 B5APU8 | 4             | 0          | 3          | 0              | 0              | 0              | 3              | 2              | 11         | 0          | 14             | 0              | 0              | 0              | 8                 | 2          | 30.9%      | 0.0%           | 19.1%          | 0.0%           | 0.0%           | 0.0% | 19.7% | 23.6% |
| tr F2Z540 F2Z540 | 4             | 2          | 0          | 0              | 0              | 0              | 1              | 0              | 7          | 4          | 0              | 0              | 0              | 0              | 4                 | 0          | 9.0%       | 7.8%           | 0.0%           | 0.0%           | 0.0%           | 0.0% | 5.7%  | 0.0%  |
| tr F1SB18 F1SB18 | 6             | 1          | 1          | 0              | 0              | 0              | 0              | 3              | 10         | 1          | 9              | 0              | 0              | 0              | 0                 | 6          | 14.9%      | 4.3%           | 3.8%           | 0.0%           | 0.0%           | 0.0% | 14.3% | 0.0%  |
| tr I3LFW6 I3LFW6 | 3             | 0          | 3          | 0              | 0              | 0              | 2              | 2              | 11         | 0          | 21             | 0              | 0              | 0              | 3                 | 5          | 12.9%      | 0.0%           | 17.0%          | 0.0%           | 0.0%           | 0.0% | 12.9% | 27.9% |
| tr I3LC26 I3LC26 | 2             | 2          | 1          | 0              | 0              | 0              | 0              | 1              | 4          | 7          | 7              | 0              | 0              | 0              | 0                 | 4          | 6.1%       | 9.2%           | 5.4%           | 0.0%           | 0.0%           | 0.0% | 13.8% | 0.0%  |
| tr F2Z545 F2Z545 | 2             | 3          | 3          | 0              | 0              | 0              | 1              | 1              | 3          | 8          | 21             | 0              | 0              | 0              | 5                 | 2          | 29.5%      | 44.6%          | 41.1%          | 0.0%           | 0.0%           | 0.0% | 17.9% | 11.6% |
| A7TX81           | 5             | 1          | 2          | 0              | 0              | 0              | 0              | 2              | 8          | 3          | 10             | 0              | 0              | 0              | 0                 | 4          | 27.6%      | 3.4%           | 9.6%           | 0.0%           | 0.0%           | 0.0% | 13.0% | 0.0%  |
| tr F1SEY8 F1SEY8 | 5             | 3          | 4          | 0              | 0              | 0              | 0              | 1              | 8          | 3          | 11             | 0              | 0              | 0              | 0                 | 2          | 10.0%      | 5.2%           | 10.3%          | 0.0%           | 0.0%           | 0.0% | 3.8%  | 0.0%  |
| tr I7GF95 I7GF95 | 4             | 2          | 0          | 0              | 0              | 0              | 0              | 1              | 5          | 6          | 0              | 0              | 0              | 0              | 0                 | 1          | 10.7%      | 3.8%           | 0.0%           | 0.0%           | 0.0%           | 0.0% | 3.0%  | 0.0%  |
| tr F1RS34 F1RS34 | 5             | 1          | 2          | 0              | 0              | 0              | 0              | 1              | 10         | 1          | 19             | 0              | 0              | 0              | 0                 | 2          | 4.8%       | 0.9%           | 2.4%           | 0.0%           | 0.0%           | 0.0% | 1.3%  | 0.0%  |
| tr F1SN63 F1SN63 | 2             | 2          | 2          | 0              | 0              | 0              | 1              | 0              | 5          | 6          | 6              | 0              | 0              | 0              | 1                 | 0          | 4.3%       | 4.7%           | 5.8%           | 0.0%           | 0.0%           | 0.0% | 2.4%  | 0.0%  |
| tr F1RJ74 F1RJ74 | 7             | 1          | 6          | 0              | 0              | 0              | 1              | 1              | 10         | 1          | 24             | 0              | 0              | 0              | 1                 | 1          | 22.7%      | 2.4%           | 22.7%          | 0.0%           | 0.0%           | 0.0% | 5.9%  | 8.0%  |
| tr F1SGB0 F1SGB0 | 4             | 0          | 2          | 0              | 0              | 0              | 0              | 1              | 11         | 0          | 26             | 0              | 0              | 0              | 2                 | 0          | 6.9%       | 0.0%           | 5.7%           | 0.0%           | 0.0%           | 0.0% | 2.6%  | 0.0%  |
| tr I3LAK5 I3LAK5 | 4             | 0          | 3          | 0              | 0              | 0              | 1              | 0              | 11         | 0          | 31             | 0              | 0              | 0              | 2                 | 0          | 5.9%       | 0.0%           | 7.4%           | 0.0%           | 0.0%           | 0.0% | 2.3%  | 0.0%  |
| tr I3LH62 I3LH62 | 4             | 0          | 3          | 0              | 0              | 0              | 1              | 0              | 11         | 0          | 31             | 0              | 0              | 0              | 2                 | 0          | 5.5%       | 0.0%           | 6.8%           | 0.0%           | 0.0%           | 0.0% | 2.1%  | 0.0%  |
| tr F1SIY3 F1SIY3 | 4             | 2          | 2          | 0              | 0              | 0              | 1              | 0              | 7          | 4          | 14             | 0              | 0              | 0              | 1                 | 0          | 25.6%      | 13.1%          | 11.3%          | 0.0%           | 0.0%           | 0.0% | 11.3% | 0.0%  |
| tr F1STY1 F1STY1 | 3             | 2          | 2          | 0              | 0              | 0              | 1              | 1              | 6          | 5          | 15             | 0              | 0              | 0              | 1                 | 0          | 29.5%      | 24.6%          | 16.4%          | 0.0%           | 0.0%           | 0.0% | 9.0%  | 0.0%  |
| tr F1RPV1 F1RPV1 | 5             | 0          | 0          | 0              | 0              | 0              | 0              | 0              | 11         | 0          | 0              | 0              | 0              | 0              | 0                 | 0          | 22.7%      | 0.0%           | 0.0%           | 0.0%           | 0.0%           | 0.0% | 0.0%  | 0.0%  |
| tr F1RT28 F1RT28 | 9             | 1          | 0          | 0              | 0              | 0              | 0              | 0              | 10         | 1          | 0              | 0              | 0              | 0              | 0                 | 0          | 15.7%      | 1.4%           | 0.0%           | 0.0%           | 0.0%           | 0.0% | 0.0%  | 0.0%  |
| tr F1RK23 F1RK23 | 0             | 2          | 0          | 0              | 0              | 0              | 0              | 0              | 0          | 11         | 0              | 0              | 0              | 0              | 0                 | 0          | 0.0%       | 12.4%          | 0.0%           | 0.0%           | 0.0%           | 0.0% | 0.0%  | 0.0%  |
| tr F1SSM7 F1SSM7 | 6             | 2          | 0          | 0              | 0              | 0              | 0              | 0              | 7          | 4          | 0              | 0              | 0              | 0              | 0                 | 0          | 10.5%      | 4.3%           | 0.0%           | 0.0%           | 0.0%           | 0.0% | 0.0%  | 0.0%  |
| tr F1SG88 F1SG88 | 7             | 1          | 0          | 0              | 0              | 0              | 0              | 0              | 10         | 1          | 0              | 0              | 0              | 0              | 0                 | 0          | 15.5%      | 4.5%           | 0.0%           | 0.0%           | 0.0%           | 0.0% | 0.0%  | 0.0%  |
| tr F1S9W8 F1S9W8 | 7             | 1          | 0          | 0              | 0              | 0              | 0              | 0              | 7          | 4          | 0              | 0              | 0              | 0              | 0                 | 0          | 19.6%      | 2.5%           | 0.0%           | 0.0%           | 0.0%           | 0.0% | 0.0%  | 0.0%  |
| tr F2Z5M0 F2Z5M0 | 0             | 1          | 0          | 0              | 0              | 0              | 0              | 0              | 0          | 11         | 0              | 0              | 0              | 0              | 0                 | 0          | 0.0%       | 6.9%           | 0.0%           | 0.0%           | 0.0%           | 0.0% | 0.0%  | 0.0%  |
| tr I3LEF1 I3LEF1 | 7             | 1          | 0          | 0              | 0              | 0              | 0              | 0              | 10         | 1          | 0              | 0              | 0              | 0              | 0                 | 0          | 15.5%      | 4.5%           | 0.0%           | 0.0%           | 0.0%           | 0.0% | 0.0%  | 0.0%  |
| tr F1S221 F1S221 | 1             | 3          | 0          | 0              | 0              | 0              | 0              | 0              | 1          | 10         | 0              | 0              | 0              | 0              | 0                 | 0          | 2.5%       | 3.7%           | 0.0%           | 0.0%           | 0.0%           | 0.0% | 0.0%  | 0.0%  |
| tr I3LRC8 I3LRC8 | 2             | 2          | 0          | 0              | 0              | 0              | 0              | 0              | 7          | 4          | 0              | 0              | 0              | 0              | 0                 | 0          | 17.6%      | 11.3%          | 0.0%           | 0.0%           | 0.0%           | 0.0% | 0.0%  | 0.0%  |
| tr F1SIV9 F1SIV9 | 4             | 1          | 0          | 0              | 0              | 0              | 0              | 0              | 9          | 2          | 0              | 0              | 0              | 0              | 0                 | 0          | 10.7%      | 2.5%           | 0.0%           | 0.0%           | 0.0%           | 0.0% | 0.0%  | 0.0%  |
| tr F1SSL4 F1SSL4 | 5             | 0          | 0          | 0              | 0              | 0              | 0              | 0              | 11         | 0          | 0              | 0              | 0              | 0              | 0                 | 0          | 11.0%      | 0.0%           | 0.0%           | 0.0%           | 0.0%           | 0.0% | 0.0%  | 0.0%  |
| tr F1SIB5 F1SIB5 | 5             | 2          | 0          | 0              | 0              | 0              | 0              | 0              | 7          | 4          | 0              | 0              | 0              | 0              | 0                 | 0          | 5.1%       | 3.0%           | 0.0%           | 0.0%           | 0.0%           | 0.0% | 0.0%  | 0.0%  |
| tr F1RHR8 F1RHR8 | 6             | 3          | 0          | 0              | 0              | 0              | 0              | 0              | 8          | 3          | 0              | 0              | 0              | 0              | 0                 | 0          | 4.5%       | 1.9%           | 0.0%           | 0.0%           | 0.0%           | 0.0% | 0.0%  | 0.0%  |
| tr Q2TJZ7 Q2TJZ7 | 1             | 2          | 0          | 0              | 0              | 0              | 0              | 0              | 1          | 10         | 0              | 0              | 0              | 0              | 0                 | 0          | 15.7%      | 15.7%          | 0.0%           | 0.0%           | 0.0%           | 0.0% | 0.0%  | 0.0%  |
| tr F1SCV1 F1SCV1 | 2             | 2          | 0          | 0              | 0              | 0              | 0              | 0              | 2          | 9          | 0              | 0              | 0              | 0              | 0                 | 0          | 1.7%       | 4.7%           | 0.0%           | 0.0%           | 0.0%           | 0.0% | 0.0%  | 0.0%  |
| tr I3LHZ9 I3LHZ9 | 10            | 0          | 1          | 0              | 0              | 0              | 0              | 0              | 11         | 0          | 1              | 0              | 0              | 0              | 0                 | 0          | 11.2%      | 0.0%           | 0.9%           | 0.0%           | 0.0%           | 0.0% | 0.0%  | 0.0%  |
| tr F1SL55 F1SL55 | 8             | 0          | 1          | 0              | 0              | 0              | 0              | 0              | 11         | 0          | 1              | 0              | 0              | 0              | 0                 | 0          | 32.5%      | 0.0%           | 4.2%           | 0.0%           | 0.0%           | 0.0% | 0.0%  | 0.0%  |
| tr F1SRE0 F1SRE0 | 4             | 2          | 1          | 0              | 0              | 0              | 0              | 0              | 5          | 6          | 2              | 0              | 0              | 0              | 0                 | 0          | 8.6%       | 4.3%           | 2.3%           | 0.0%           | 0.0%           | 0.0% | 0.0%  | 0.0%  |
| tr F1SMR6 F1SMR6 | 3             | 1          | 1          | 0              | 0              | 0              | 0              | 0              | 9          | 2          | 2              | 0              | 0              | 0              | 0                 | 0          | 14.6%      | 3.4%           | 5.9%           | 0.0%           | 0.0%           | 0.0% | 0.0%  | 0.0%  |
| tr I3LTG5 I3LTG5 | 3             | 1          | 1          | 0              | 0              | 0              | 0              | 0              | 9          | 2          | 2              | 0              | 0              | 0              | 0                 | 0          | 14.2%      | 3.3%           | 5.8%           | 0.0%           | 0.0%           | 0.0% | 0.0%  | 0.0%  |
| tr K7GL02 K7GL02 | 5             | 3          | 3          | 0              | 0              | 0              | 0              | 0              | 6          | 5          | 3              | 0              | 0              | 0              | 0                 | 0          | 9.0%       | 3.7%           | 6.5%           | 0.0%           | 0.0%           | 0.0% | 0.0%  | 0.0%  |
| Q767L0           | 5             | 3          | 3          | 0              | 0              | 0              | 0              | 0              | 6          | 5          | 3              | 0              | 0              | 0              | 0                 | 0          | 9.4%       | 3.8%           | 6.8%           | 0.0%           | 0.0%           | 0.0% | 0.0%  | 0.0%  |
| tr F1SH24 F1SH24 | 2             | 1          | 1          | 0              | 0              | 0              | 0              | 0              | 2          | 9          | 5              | 0              | 0              | 0              | 0                 | 0          | 6.1%       | 1.6%           | 3.0%           | 0.0%           | 0.0%           | 0.0% | 0.0%  | 0.0%  |
| tr I3L6A9 I3L6A9 | 5             | 1          | 1          | 0              | 0              | 0              | 0              | 0              | 10         | 1          | 5              | 0              | 0              | 0              | 0                 | 0          | 42.0%      | 5.7%           | 8.3%           | 0.0%           | 0.0%           | 0.0% | 0.0%  | 0.0%  |
| tr F1S912 F1S912 | 4             | 3          | 2          | 0              | 0              | 0              | 0              | 0              | 6          | 5          | 7              | 0              | 0              | 0              | 0                 | 0          | 14.7%      | 10.9%          | 3.4%           | 0.0%           | 0.0%           | 0.0% | 0.0%  | 0.0%  |
| tr Q8HXL4 Q8HXL4 | 5             | 3          | 2          | 0              | 0              | 0              | 0              | 0              | 6          | 5          | 7              | 0              | 0              | 0              | 0                 | 0          | 29.1%      | 14.3%          | 16.8%          | 0.0%           | 0.0%           | 0.0% | 0.0%  | 0.0%  |
| tr I3LSQ7 I3LSQ7 | 5             | 0          | 2          | 0              | 0              | 0              | 0              | 0              | 11         | 0          | 9              | 0              | 0              | 0              | 0                 | 0          | 14.7%      | 0.0%           | 5.1%           | 0.0%           | 0.0%           | 0.0% | 0.0%  | 0.0%  |
| tr F1SLH0 F1SLH0 | 6             | 0          | 1          | 0              | 0              | 0              | 0              | 0              | 11         | 0          | 11             | 0              | 0              | 0              | 0                 | 0          | 33.5%      | 0.0%           | 10.0%          | 0.0%           | 0.0%           | 0.0% | 0.0%  | 0.0%  |
| tr I3LGP4 I3LGP4 | 7             | 3          | 4          | 0              | 0              | 0              | 0              | 0              | 7          | 4          | 11             | 0              | 0              | 0              | 0                 | 0          | 8.0%       | 3.5%           | 6.9%           | 0.0%           | 0.0%           | 0.0% | 0.0%  | 0.0%  |
| tr F1SB16 F1SB16 | 6             | 1          | 3          | 0              | 0              | 0              | 0              | 0              | 9          | 2          | 17             | 0              | 0              | 0              | 0                 | 0          | 27.4%      | 3.1%           | 11.3%          | 0.0%           | 0.0%           | 0.0% | 0.0%  | 0.0%  |
| tr F1S684 F1S684 | 4             | 3          | 6          | 0              | 0              | 0              | 0              | 0              | 6          | 5          | 18             | 0              | 0              | 0              | 0                 | 0          | 5.5%       | 2.9%           | 8.9%           | 0.0%           | 0.0%           | 0.0% | 0.0%  | 0     |

| Sample#          | Peptide Count |            |            |                |                |                |                | Spectral Count |            |            |            |                |                |                |                | Sequence Coverage |            |            |            |                |                |                |                |                |
|------------------|---------------|------------|------------|----------------|----------------|----------------|----------------|----------------|------------|------------|------------|----------------|----------------|----------------|----------------|-------------------|------------|------------|------------|----------------|----------------|----------------|----------------|----------------|
|                  | Whole Cell    | Whole Cell | Whole Cell | Cilia Fraction | Whole Cell | Whole Cell | Whole Cell | Cilia Fraction    | Whole Cell | Whole Cell | Whole Cell | Cilia Fraction |
|                  | 1             | 2          | 6          | 4              | 3              | 5              | 7              | 8              | 1          | 2          | 6          | 4              | 3              | 5              | 7              | 8                 | 1          | 2          | 6          | 4              | 3              | 5              | 7              | 8              |
| Accession        |               |            |            |                |                |                |                |                |            |            |            |                |                |                |                |                   |            |            |            |                |                |                |                |                |
| tr F1S4Y6 F1S4Y6 | 5             | 1          | 2          | 0              | 0              | 0              | 1              | 1              | 7          | 3          | 27         | 0              | 0              | 0              | 3              | 4                 | 59.4%      | 16.7%      | 21.9%      | 0.0%           | 0.0%           | 0.0%           | 16.7%          | 22.9%          |
| tr F1RRB7 F1RRB7 | 7             | 0          | 2          | 0              | 0              | 0              | 1              | 0              | 10         | 0          | 8          | 0              | 0              | 0              | 3              | 0                 | 19.0%      | 0.0%       | 7.5%       | 0.0%           | 0.0%           | 0.0%           | 4.7%           | 0.0%           |
| tr I3LPH5 I3LPH5 | 6             | 1          | 3          | 0              | 0              | 0              | 1              | 0              | 8          | 2          | 20         | 0              | 0              | 0              | 4              | 0                 | 22.5%      | 2.2%       | 8.7%       | 0.0%           | 0.0%           | 0.0%           | 3.8%           | 0.0%           |
| Q5PYH3           | 6             | 1          | 1          | 0              | 0              | 0              | 0              | 2              | 9          | 1          | 5          | 0              | 0              | 0              | 0              | 2                 | 29.8%      | 5.6%       | 5.6%       | 0.0%           | 0.0%           | 0.0%           | 0.0%           | 19.7%          |
| tr F1S6G4 F1S6G4 | 4             | 2          | 0          | 0              | 0              | 0              | 0              | 1              | 7          | 3          | 0          | 0              | 0              | 0              | 0              | 1                 | 25.3%      | 16.7%      | 0.0%       | 0.0%           | 0.0%           | 0.0%           | 0.0%           | 22.4%          |
| tr K7GSG6 K7GSG6 | 3             | 1          | 0          | 0              | 0              | 0              | 0              | 1              | 9          | 1          | 0          | 0              | 0              | 0              | 0              | 1                 | 9.3%       | 1.5%       | 0.0%       | 0.0%           | 0.0%           | 0.0%           | 0.0%           | 2.7%           |
| tr F1S169 F1S169 | 3             | 1          | 0          | 0              | 0              | 0              | 0              | 1              | 9          | 1          | 0          | 0              | 0              | 0              | 0              | 1                 | 7.7%       | 4.2%       | 0.0%       | 0.0%           | 0.0%           | 0.0%           | 0.0%           | 3.5%           |
| tr F1S5H9 F1S5H9 | 2             | 2          | 0          | 0              | 0              | 0              | 0              | 1              | 3          | 7          | 0          | 0              | 0              | 0              | 0              | 1                 | 10.8%      | 3.5%       | 0.0%       | 0.0%           | 0.0%           | 0.0%           | 0.0%           | 5.2%           |
| tr F1RRR5 F1RRR5 | 3             | 1          | 0          | 0              | 0              | 0              | 0              | 1              | 9          | 1          | 0          | 0              | 0              | 0              | 0              | 1                 | 5.8%       | 0.9%       | 0.0%       | 0.0%           | 0.0%           | 0.0%           | 0.0%           | 1.7%           |
| tr F1RGP8 F1RGP8 | 6             | 0          | 4          | 0              | 0              | 0              | 0              | 1              | 10         | 0          | 13         | 0              | 0              | 0              | 0              | 2                 | 22.2%      | 0.0%       | 14.4%      | 0.0%           | 0.0%           | 0.0%           | 0.0%           | 5.3%           |
| tr F1SR61 F1SR61 | 2             | 2          | 1          | 0              | 0              | 0              | 0              | 1              | 2          | 8          | 2          | 0              | 0              | 0              | 0              | 1                 | 6.5%       | 5.3%       | 4.2%       | 0.0%           | 0.0%           | 0.0%           | 0.0%           | 2.4%           |
| Q8MI23           | 5             | 0          | 1          | 0              | 0              | 0              | 0              | 1              | 10         | 0          | 4          | 0              | 0              | 0              | 0              | 1                 | 21.4%      | 0.0%       | 5.6%       | 0.0%           | 0.0%           | 0.0%           | 0.0%           | 5.9%           |
| tr I3LC35 I3LC35 | 4             | 2          | 1          | 0              | 0              | 0              | 0              | 1              | 5          | 5          | 4          | 0              | 0              | 0              | 0              | 1                 | 16.2%      | 5.0%       | 4.0%       | 0.0%           | 0.0%           | 0.0%           | 0.0%           | 1.9%           |
| tr F1S4D5 F1S4D5 | 3             | 3          | 1          | 0              | 0              | 0              | 0              | 1              | 7          | 3          | 6          | 0              | 0              | 0              | 0              | 1                 | 12.1%      | 12.8%      | 2.8%       | 0.0%           | 0.0%           | 0.0%           | 0.0%           | 2.1%           |
| tr F1S087 F1S087 | 6             | 0          | 9          | 0              | 0              | 0              | 0              | 2              | 10         | 0          | 48         | 0              | 0              | 0              | 0              | 2                 | 19.9%      | 0.0%       | 21.4%      | 0.0%           | 0.0%           | 0.0%           | 0.0%           | 8.8%           |
| tr I3LB79 I3LB79 | 7             | 1          | 3          | 0              | 0              | 0              | 1              | 0              | 9          | 1          | 22         | 0              | 0              | 0              | 1              | 0                 | 43.6%      | 5.5%       | 25.7%      | 0.0%           | 0.0%           | 0.0%           | 5.5%           | 0.0%           |
| tr F1S809 F1S809 | 7             | 1          | 3          | 0              | 0              | 0              | 1              | 0              | 9          | 1          | 22         | 0              | 0              | 0              | 0              | 1                 | 44.2%      | 5.6%       | 26.0%      | 0.0%           | 0.0%           | 0.0%           | 5.6%           | 0.0%           |
| tr I3LQS2 I3LQS2 | 5             | 1          | 0          | 0              | 0              | 0              | 0              | 0              | 9          | 1          | 0          | 0              | 0              | 0              | 0              | 0                 | 27.8%      | 7.1%       | 0.0%       | 0.0%           | 0.0%           | 0.0%           | 0.0%           | 0.0%           |
| tr K7GQ86 K7GQ86 | 1             | 4          | 0          | 0              | 0              | 0              | 0              | 0              | 1          | 9          | 0          | 0              | 0              | 0              | 0              | 0                 | 3.8%       | 7.6%       | 0.0%       | 0.0%           | 0.0%           | 0.0%           | 0.0%           | 0.0%           |
| tr I3LQD7 I3LQD7 | 6             | 1          | 0          | 0              | 0              | 0              | 0              | 0              | 9          | 1          | 0          | 0              | 0              | 0              | 0              | 0                 | 8.6%       | 2.0%       | 0.0%       | 0.0%           | 0.0%           | 0.0%           | 0.0%           | 0.0%           |
| Q28832           | 0             | 1          | 0          | 0              | 0              | 0              | 0              | 0              | 0          | 10         | 0          | 0              | 0              | 0              | 0              | 0                 | 0.0%       | 1.6%       | 0.0%       | 0.0%           | 0.0%           | 0.0%           | 0.0%           | 0.0%           |
| tr F1S940 F1S940 | 2             | 1          | 0          | 0              | 0              | 0              | 0              | 0              | 4          | 6          | 0          | 0              | 0              | 0              | 0              | 0                 | 4.7%       | 1.3%       | 0.0%       | 0.0%           | 0.0%           | 0.0%           | 0.0%           | 0.0%           |
| tr F1RQT7 F1RQT7 | 3             | 1          | 0          | 0              | 0              | 0              | 0              | 0              | 10         | 0          | 0          | 0              | 0              | 0              | 0              | 0                 | 8.1%       | 0.0%       | 0.0%       | 0.0%           | 0.0%           | 0.0%           | 0.0%           | 0.0%           |
| tr F1SFA7 F1SFA7 | 3             | 3          | 0          | 0              | 0              | 0              | 0              | 0              | 5          | 5          | 0          | 0              | 0              | 0              | 0              | 0                 | 3.2%       | 2.3%       | 0.0%       | 0.0%           | 0.0%           | 0.0%           | 0.0%           | 0.0%           |
| tr F1S5G4 F1S5G4 | 7             | 1          | 0          | 0              | 0              | 0              | 0              | 0              | 9          | 1          | 0          | 0              | 0              | 0              | 0              | 0                 | 23.3%      | 4.1%       | 0.0%       | 0.0%           | 0.0%           | 0.0%           | 0.0%           | 0.0%           |
| Q29318           | 0             | 2          | 0          | 0              | 0              | 0              | 0              | 0              | 0          | 10         | 0          | 0              | 0              | 0              | 0              | 0                 | 0.0%       | 13.4%      | 0.0%       | 0.0%           | 0.0%           | 0.0%           | 0.0%           | 0.0%           |
| tr F1S9P9 F1S9P9 | 2             | 2          | 0          | 0              | 0              | 0              | 0              | 0              | 3          | 7          | 0          | 0              | 0              | 0              | 0              | 0                 | 5.6%       | 5.6%       | 0.0%       | 0.0%           | 0.0%           | 0.0%           | 0.0%           | 0.0%           |
| tr F1RIG2 F1RIG2 | 6             | 0          | 0          | 0              | 0              | 0              | 0              | 0              | 10         | 0          | 0          | 0              | 0              | 0              | 0              | 0                 | 8.0%       | 0.0%       | 0.0%       | 0.0%           | 0.0%           | 0.0%           | 0.0%           | 0.0%           |
| tr I3LT48 I3LT48 | 7             | 1          | 0          | 0              | 0              | 0              | 0              | 0              | 9          | 1          | 0          | 0              | 0              | 0              | 0              | 0                 | 50.9%      | 9.6%       | 0.0%       | 0.0%           | 0.0%           | 0.0%           | 0.0%           | 0.0%           |
| tr I3LKN9 I3LKN9 | 2             | 2          | 0          | 0              | 0              | 0              | 0              | 0              | 3          | 7          | 0          | 0              | 0              | 0              | 0              | 0                 | 5.5%       | 5.5%       | 0.0%       | 0.0%           | 0.0%           | 0.0%           | 0.0%           | 0.0%           |
| tr K7GL74 K7GL74 | 3             | 0          | 0          | 0              | 0              | 0              | 0              | 0              | 10         | 0          | 0          | 0              | 0              | 0              | 0              | 0                 | 70.5%      | 0.0%       | 0.0%       | 0.0%           | 0.0%           | 0.0%           | 0.0%           | 0.0%           |
| tr K7GQ13 K7GQ13 | 1             | 4          | 0          | 0              | 0              | 0              | 0              | 0              | 1          | 9          | 0          | 0              | 0              | 0              | 0              | 0                 | 3.6%       | 7.2%       | 0.0%       | 0.0%           | 0.0%           | 0.0%           | 0.0%           | 0.0%           |
| tr I3LNS4 I3LNS4 | 4             | 1          | 0          | 0              | 0              | 0              | 0              | 0              | 7          | 3          | 0          | 0              | 0              | 0              | 0              | 0                 | 8.4%       | 7.5%       | 0.0%       | 0.0%           | 0.0%           | 0.0%           | 0.0%           | 0.0%           |
| tr F1SJE8 F1SJE8 | 2             | 1          | 1          | 0              | 0              | 0              | 0              | 0              | 2          | 8          | 1          | 0              | 0              | 0              | 0              | 0                 | 8.6%       | 3.5%       | 3.5%       | 0.0%           | 0.0%           | 0.0%           | 0.0%           | 0.0%           |
| tr F1RVX4 F1RVX4 | 7             | 0          | 1          | 0              | 0              | 0              | 0              | 0              | 10         | 0          | 2          | 0              | 0              | 0              | 0              | 0                 | 34.3%      | 0.0%       | 5.4%       | 0.0%           | 0.0%           | 0.0%           | 0.0%           | 0.0%           |
| tr F1RJR2 F1RJR2 | 5             | 0          | 1          | 0              | 0              | 0              | 0              | 0              | 10         | 0          | 3          | 0              | 0              | 0              | 0              | 0                 | 16.2%      | 0.0%       | 6.6%       | 0.0%           | 0.0%           | 0.0%           | 0.0%           | 0.0%           |
| tr I3L712 I3L712 | 6             | 2          | 2          | 0              | 0              | 0              | 0              | 0              | 6          | 4          | 3          | 0              | 0              | 0              | 0              | 0                 | 9.6%       | 2.2%       | 4.0%       | 0.0%           | 0.0%           | 0.0%           | 0.0%           | 0.0%           |
| P40125           | 2             | 1          | 1          | 0              | 0              | 0              | 0              | 0              | 3          | 7          | 4          | 0              | 0              | 0              | 0              | 0                 | 8.6%       | 5.2%       | 4.7%       | 0.0%           | 0.0%           | 0.0%           | 0.0%           | 0.0%           |
| tr I3LVG4 I3LVG4 | 5             | 1          | 3          | 0              | 0              | 0              | 0              | 0              | 8          | 2          | 5          | 0              | 0              | 0              | 0              | 0                 | 31.8%      | 5.1%       | 12.9%      | 0.0%           | 0.0%           | 0.0%           | 0.0%           | 0.0%           |
| tr I3LDD2 I3LDD2 | 6             | 0          | 2          | 0              | 0              | 0              | 0              | 0              | 10         | 0          | 5          | 0              | 0              | 0              | 0              | 0                 | 26.2%      | 0.0%       | 6.0%       | 0.0%           | 0.0%           | 0.0%           | 0.0%           | 0.0%           |
| tr F1SP49 F1SP49 | 3             | 0          | 1          | 0              | 0              | 0              | 0              | 0              | 10         | 0          | 6          | 0              | 0              | 0              | 0              | 0                 | 7.4%       | 0.0%       | 6.8%       | 0.0%           | 0.0%           | 0.0%           | 0.0%           | 0.0%           |
| tr F1SND4 F1SND4 | 4             | 1          | 1          | 0              | 0              | 0              | 0              | 0              | 9          | 1          | 7          | 0              | 0              | 0              | 0              | 0                 | 23.5%      | 3.1%       | 6.2%       | 0.0%           | 0.0%           | 0.0%           | 0.0%           | 0.0%           |
| tr K7GRE2 K7GRE2 | 1             | 2          | 1          | 0              | 0              | 0              | 0              | 0              | 3          | 7          | 7          | 0              | 0              | 0              | 0              | 0                 | 12.9%      | 22.8%      | 12.9%      | 0.0%           | 0.0%           | 0.0%           | 0.0%           | 0.0%           |
| tr I3LDX3 I3LDX3 | 2             | 1          | 4          | 0              | 0              | 0              | 0              | 0              | 9          | 1          | 15         | 0              | 0              | 0              | 0              | 0                 | 20.0%      | 4.3%       | 11.3%      | 0.0%           | 0.0%           | 0.0%           | 0.0%           | 0.0%           |
| tr K7GMV2 K7GMV2 | 5             | 2          | 4          | 0              | 0              | 0              | 0              | 0              | 5          | 5          | 19         | 0              | 0              | 0              | 0              | 0                 | 29.8%      | 8.1%       | 17.3%      | 0.0%           | 0.0%           | 0.0%           | 0.0%           | 0.0%           |
| P55931           | 4             | 0          | 3          | 0              | 0              | 0              | 0              | 0              | 10         | 0          | 19         | 0              | 0              | 0              | 0              | 0                 | 10.2%      | 0.0%       | 7.9%       | 0.0%           | 0.0%           | 0.0%           | 0.0%           | 0.0%           |
| tr F1S3W0 F1S3W0 | 3             | 0          | 3          | 0              | 0              | 0              | 0              | 0              | 10         | 0          | 254        | 0              | 0              | 0              | 0              | 0                 | 48.4%      | 0.0%       | 48.4%      | 0.0%           | 0.0%           | 0.0%           | 0.0%           | 0.0%           |
| tr F1RY38 F1RY38 | 4             | 0          | 4          | 0              | 0              | 0              | 2              | 6              | 9          | 0          | 24         | 0              | 0              | 0              | 23             | 112               | 24.3%      | 0.0%       | 27.2%      | 0.0%           | 0.0%           | 0.0%           | 23.3%          | 28.2%          |
| tr K7GT57 K7GT57 | 3             | 1          | 0          | 0              | 0              | 0              | 1              | 3              | 7          | 2          | 0          | 0              | 0              | 0              | 21             | 10                | 41.5%      | 9.2%       | 0.0%       | 0.0%           | 0.0%           | 0.0%           | 7.7%           | 32.3%          |
| tr K7GM15 K7GM15 | 2             | 0          | 0          | 0              | 0              | 0              | 0              | 4              | 9          | 0          | 0          | 0              | 0              | 0              | 0              | 31                | 7.5%       | 0.0%       | 0.0%       | 0.0%           | 0.0%           | 0.0%           | 0.0%           | 7.5%           |
| tr F1RTG8 F1RTG8 | 2             | 0          | 0          | 0              | 0              | 0              | 0              | 0              | 9          | 0          | 0          | 0              | 0              | 0              | 0              | 31                | 7.7%       | 0.0%       | 0.0%       | 0.0%           | 0.0%           | 0.0%           | 0.0%           | 7.7%           |
| tr F1RGA9 F1RGA9 | 5             | 2          | 3          | 0              | 0              | 0              | 3              | 3              | 5          | 4          | 12         | 0              | 0              | 0              | 24             | 19                | 18.4%      | 5.5%       | 6.1%       | 0.0%           | 0.0%           | 0.0%           | 13.3%          | 14.0%          |
| P24853           | 3             | 0          | 0          | 0              | 0              | 0              | 1              | 2              | 9          | 0          | 0          | 0              | 0              | 0              | 11             | 6                 | 17.4%      | 0.0%       | 0.0%       | 0.0%           | 0.0%           | 0.0%           | 13.3%          | 20.6%          |
| Q8MJ14           | 4             | 0          | 0          | 0              | 0              | 0              | 1              | 4              | 9          | 0          | 0          | 0              | 0              | 0              | 3              | 11                | 18.9%      | 0.0%       | 0.0%       | 0.0%           | 0.0%           | 0.0%           | 10.7%          | 26.7%          |
| tr I3LDF4 I3LDF4 | 8             | 0          | 3          | 0              | 0              | 0              | 3              | 5              | 9          | 0          | 6          | 0              | 0              | 0              | 7              | 11                | 32.4%      | 0.0%       | 4.9%       | 0.0%           | 0.0%           | 0.0%           | 18.7%          | 36.8%          |
| tr F1RGU1 F1RGU1 | 3             | 0          | 1          | 0              | 0              | 0              | 1              | 1              | 9          | 0          | 2          | 0              | 0              | 0              | 4              | 8                 | 12.8%      | 0.0%       | 7.6%       | 0.0%           | 0.0%           | 0.0%           | 6.6%           | 6.6%           |
| P20112           | 5             | 1          | 4          | 0              | 0              | 0              | 1              | 5              | 6          | 3          | 39         | 0              | 0              | 0              | 9              | 33                | 26.7%      | 3.3%       | 9.7%       | 0.0%           | 0.0%           | 0.0%           | 4.3%           | 20.3%          |
| tr F2Z5W0 F2Z5W0 | 4             | 0          | 2          | 0              | 0              | 0              | 0              | 2              | 9          | 0          | 11         | 0              | 0              | 0              | 0              | 15                | 35.9%      | 0.0%       | 31.1%      | 0.0%           | 0.0%           | 0.0%           | 0.0%           | 19.4%          |
| tr F1RKX9 F1RKX9 | 4             | 1          | 1          | 0              | 0              | 0              | 0              | 2              | 8          | 1          | 3          | 0              | 0              | 0              | 0              | 8                 | 18.8%      | 4.3%       | 5.6%       | 0.0%           | 0.0%           | 0.0%           | 0.0%           | 7.9%           |
| tr F1SSS1 F1SSS1 | 5             | 1          | 1          | 0              | 0              | 0              | 0              | 2              | 6          | 3          | 1          | 0              | 0              | 0              | 0              | 4                 | 20.6%      | 3.0%       | 4.8%       | 0.0%           | 0.0%           | 0.0%           | 0.0%           | 9.3%           |
| tr F1RN71 F1RN71 | 3             | 2          | 1          | 0              | 0              | 0              | 0              | 2              | 4          | 5          | 1          | 0              | 0              | 0              | 0              | 4                 | 21.4%      | 17.7%      | 6.8%       | 0.0%           | 0.0%           | 0.0%           | 0.0%           | 15.1%          |
| tr I3LGJ4 I3LGJ4 | 3             | 2          | 4          | 0              | 0              | 0              | 0              | 2              | 7          | 2          | 17         | 0              | 0              | 0              | 0              | 9                 | 13.6%      | 3.3%       | 20.9%      | 0.0%           | 0.0%           | 0.0%           | 0.0%           | 9.2%           |
| tr I3L852 I3L852 | 5             | 1          | 0          | 0              | 0              | 0              | 0              | 1              | 8          | 1          | 0          | 0              | 0              | 0              | 0              | 3                 | 20.5%      | 7.3%       | 0.0%       | 0.0%           | 0.0%           | 0.0%           | 0.0%           | 7.3            |

| Accession        | Sample# | Peptide Count    |            |            |                |                |                |                | Spectral Count |            |            |                |                |                |                | Sequence Coverage |            |            |                |                |                |                |       |       |
|------------------|---------|------------------|------------|------------|----------------|----------------|----------------|----------------|----------------|------------|------------|----------------|----------------|----------------|----------------|-------------------|------------|------------|----------------|----------------|----------------|----------------|-------|-------|
|                  |         | Whole Cell       | Whole Cell | Whole Cell | Cilia Fraction | Cilia Fraction | Cilia Fraction | Cilia Fraction | Whole Cell     | Whole Cell | Whole Cell | Cilia Fraction | Cilia Fraction | Cilia Fraction | Cilia Fraction | Whole Cell        | Whole Cell | Whole Cell | Cilia Fraction | Cilia Fraction | Cilia Fraction | Cilia Fraction |       |       |
|                  |         | 1                | 2          | 6          | 4              | 3              | 5              | 7              | 1              | 2          | 6          | 4              | 3              | 5              | 7              | 1                 | 2          | 6          | 4              | 3              | 5              | 7              | 8     |       |
| tr I3L7L5 I3L7L5 |         | 2                | 3          | 2          | 0              | 0              | 0              | 2              | 2              | 3          | 6          | 150            | 0              | 0              | 0              | 7                 | 6          | 16.3%      | 25.0%          | 15.7%          | 0.0%           | 0.0%           | 18.0% | 15.1% |
| tr F1SUG3 F1SUG3 |         | 4                | 1          | 2          | 0              | 0              | 0              | 1              | 0              | 5          | 4          | 21             | 0              | 0              | 0              | 2                 | 0          | 21.0%      | 4.0%           | 5.2%           | 0.0%           | 0.0%           | 5.2%  | 0.0%  |
| tr I3LT85 I3LT85 |         | 2                | 2          | 3          | 0              | 0              | 0              | 0              | 1              | 4          | 5          | 8              | 0              | 0              | 0              | 0                 | 1          | 7.6%       | 5.5%           | 10.9%          | 0.0%           | 0.0%           | 0.0%  | 7.1%  |
| tr I3LB64 I3LB64 |         | 3                | 2          | 4          | 0              | 0              | 0              | 0              | 1              | 7          | 2          | 20             | 0              | 0              | 0              | 0                 | 1          | 9.7%       | 4.2%           | 11.7%          | 0.0%           | 0.0%           | 0.0%  | 2.2%  |
| tr F2Z5A8 F2Z5A8 |         | 8                | 1          | 4          | 0              | 0              | 0              | 0              | 1              | 8          | 1          | 20             | 0              | 0              | 0              | 0                 | 1          | 7.5%       | 0.7%           | 7.0%           | 0.0%           | 0.0%           | 0.0%  | 2.5%  |
| tr F1S895 F1S895 |         | 3                | 2          | 4          | 0              | 0              | 0              | 0              | 1              | 7          | 2          | 20             | 0              | 0              | 0              | 0                 | 1          | 9.7%       | 4.2%           | 11.7%          | 0.0%           | 0.0%           | 0.0%  | 2.2%  |
| tr I3LMC6 I3LMC6 |         | 8                | 1          | 4          | 0              | 0              | 0              | 0              | 1              | 8          | 1          | 20             | 0              | 0              | 0              | 0                 | 1          | 7.4%       | 0.7%           | 7.0%           | 0.0%           | 0.0%           | 0.0%  | 2.5%  |
| tr K7GNZ6 K7GNZ6 |         | 3                | 2          | 2          | 0              | 0              | 0              | 0              | 2              | 3          | 6          | 206            | 0              | 0              | 0              | 0                 | 7          | 27.5%      | 19.3%          | 17.4%          | 0.0%           | 0.0%           | 0.0%  | 17.4% |
| tr F1RL38 F1RL38 |         | 4                | 2          | 3          | 0              | 0              | 0              | 1              | 0              | 5          | 4          | 25             | 0              | 0              | 0              | 1                 | 0          | 28.0%      | 19.5%          | 22.0%          | 0.0%           | 0.0%           | 0.0%  | 9.3%  |
| tr E0YLM4 E0YLM4 |         | 2                | 3          | 7          | 0              | 0              | 0              | 1              | 0              | 3          | 6          | 28             | 0              | 0              | 0              | 1                 | 0          | 14.0%      | 21.8%          | 30.7%          | 0.0%           | 0.0%           | 0.0%  | 7.8%  |
| tr I3L759 I3L759 |         | 5                | 2          | 9          | 0              | 0              | 0              | 0              | 1              | 7          | 2          | 34             | 0              | 0              | 0              | 0                 | 1          | 20.8%      | 5.0%           | 16.5%          | 0.0%           | 0.0%           | 0.0%  | 5.9%  |
| tr K7GPB5 K7GPB5 |         | 3                | 0          | 0          | 0              | 0              | 0              | 0              | 0              | 9          | 0          | 0              | 0              | 0              | 0              | 0                 | 0          | 14.0%      | 0.0%           | 0.0%           | 0.0%           | 0.0%           | 0.0%  | 0.0%  |
| tr F1RWB0 F1RWB0 |         | 4                | 3          | 0          | 0              | 0              | 0              | 0              | 0              | 4          | 5          | 0              | 0              | 0              | 0              | 0                 | 0          | 15.0%      | 7.4%           | 0.0%           | 0.0%           | 0.0%           | 0.0%  | 0.0%  |
| tr F1SD69 F1SD69 |         | 3                | 0          | 0          | 0              | 0              | 0              | 0              | 0              | 9          | 0          | 0              | 0              | 0              | 0              | 0                 | 0          | 11.9%      | 0.0%           | 0.0%           | 0.0%           | 0.0%           | 0.0%  | 0.0%  |
| tr K7GMZ5 K7GMZ5 |         | 0                | 1          | 0          | 0              | 0              | 0              | 0              | 0              | 0          | 9          | 0              | 0              | 0              | 0              | 0                 | 0          | 0.0%       | 5.7%           | 0.0%           | 0.0%           | 0.0%           | 0.0%  | 0.0%  |
| tr I3LSP4 I3LSP4 |         | 6                | 0          | 0          | 0              | 0              | 0              | 0              | 0              | 9          | 0          | 0              | 0              | 0              | 0              | 0                 | 0          | 7.8%       | 0.0%           | 0.0%           | 0.0%           | 0.0%           | 0.0%  | 0.0%  |
| tr K7GNH2 K7GNH2 |         | 0                | 1          | 0          | 0              | 0              | 0              | 0              | 0              | 0          | 9          | 0              | 0              | 0              | 0              | 0                 | 0          | 0.0%       | 5.8%           | 0.0%           | 0.0%           | 0.0%           | 0.0%  | 0.0%  |
| tr F6Q2D2 F6Q2D2 |         | 4                | 1          | 0          | 0              | 0              | 0              | 0              | 0              | 7          | 2          | 0              | 0              | 0              | 0              | 0                 | 0          | 10.3%      | 5.3%           | 0.0%           | 0.0%           | 0.0%           | 0.0%  | 0.0%  |
| A4Z6H0           |         | 1                | 2          | 0          | 0              | 0              | 0              | 0              | 0              | 1          | 8          | 0              | 0              | 0              | 0              | 0                 | 0          | 3.3%       | 3.5%           | 0.0%           | 0.0%           | 0.0%           | 0.0%  | 0.0%  |
| tr I3LAW0 I3LAW0 |         | 3                | 3          | 0          | 0              | 0              | 0              | 0              | 0              | 4          | 5          | 0              | 0              | 0              | 0              | 0                 | 0          | 12.9%      | 11.4%          | 0.0%           | 0.0%           | 0.0%           | 0.0%  | 0.0%  |
| tr F1RKB2 F1RKB2 |         | 3                | 2          | 0          | 0              | 0              | 0              | 0              | 0              | 7          | 2          | 0              | 0              | 0              | 0              | 0                 | 0          | 9.2%       | 5.0%           | 0.0%           | 0.0%           | 0.0%           | 0.0%  | 0.0%  |
| tr I3LU38 I3LU38 |         | 0                | 1          | 0          | 0              | 0              | 0              | 0              | 0              | 0          | 9          | 0              | 0              | 0              | 0              | 0                 | 0          | 0.0%       | 0.5%           | 0.0%           | 0.0%           | 0.0%           | 0.0%  | 0.0%  |
| tr I3LKM9 I3LKM9 |         | tr I3LKM9 I3LKM9 |            | 0          | 0              | 0              | 0              | 0              | 0              | 9          | 0          | 0              | 0              | 0              | 0              | 0                 | 0          | 10.9%      | 0.0%           | 0.0%           | 0.0%           | 0.0%           | 0.0%  | 0.0%  |
| tr K7GRT1 K7GRT1 |         | 3                | 0          | 0          | 0              | 0              | 0              | 0              | 0              | 9          | 0          | 0              | 0              | 0              | 0              | 0                 | 0          | 18.0%      | 0.0%           | 0.0%           | 0.0%           | 0.0%           | 0.0%  | 0.0%  |
| tr I3L8C5 I3L8C5 |         | 0                | 1          | 0          | 0              | 0              | 0              | 0              | 0              | 0          | 9          | 0              | 0              | 0              | 0              | 0                 | 0          | 0.0%       | 1.9%           | 0.0%           | 0.0%           | 0.0%           | 0.0%  | 0.0%  |
| tr F1SDP2 F1SDP2 |         | 1                | 0          | 0          | 0              | 0              | 0              | 0              | 0              | 9          | 0          | 0              | 0              | 0              | 0              | 0                 | 0          | 7.8%       | 0.0%           | 0.0%           | 0.0%           | 0.0%           | 0.0%  | 0.0%  |
| tr F1S4Z5 F1S4Z5 |         | 0                | 2          | 0          | 0              | 0              | 0              | 0              | 0              | 0          | 9          | 0              | 0              | 0              | 0              | 0                 | 0          | 0.0%       | 15.7%          | 0.0%           | 0.0%           | 0.0%           | 0.0%  | 0.0%  |
| tr I3LEI8 I3LEI8 |         | 4                | 1          | 0          | 0              | 0              | 0              | 0              | 0              | 7          | 2          | 0              | 0              | 0              | 0              | 0                 | 0          | 30.2%      | 4.5%           | 0.0%           | 0.0%           | 0.0%           | 0.0%  | 0.0%  |
| tr F1RUA5 F1RUA5 |         | 2                | 2          | 0          | 0              | 0              | 0              | 0              | 0              | 5          | 4          | 0              | 0              | 0              | 0              | 0                 | 0          | 19.7%      | 19.7%          | 0.0%           | 0.0%           | 0.0%           | 0.0%  | 0.0%  |
| tr F1RWX6 F1RWX6 |         | 4                | 0          | 0          | 0              | 0              | 0              | 0              | 0              | 9          | 0          | 0              | 0              | 0              | 0              | 0                 | 0          | 8.4%       | 0.0%           | 0.0%           | 0.0%           | 0.0%           | 0.0%  | 0.0%  |
| tr K7GR43 K7GR43 |         | 2                | 2          | 0          | 0              | 0              | 0              | 0              | 0              | 5          | 4          | 0              | 0              | 0              | 0              | 0                 | 0          | 18.6%      | 18.6%          | 0.0%           | 0.0%           | 0.0%           | 0.0%  | 0.0%  |
| tr F1SR64 F1SR64 |         | 3                | 2          | 0          | 0              | 0              | 0              | 0              | 0              | 3          | 6          | 0              | 0              | 0              | 0              | 0                 | 0          | 11.7%      | 8.1%           | 0.0%           | 0.0%           | 0.0%           | 0.0%  | 0.0%  |
| tr F1LSL9 F1LSL9 |         | 5                | 2          | 0          | 0              | 0              | 0              | 0              | 0              | 5          | 4          | 0              | 0              | 0              | 0              | 0                 | 0          | 6.9%       | 2.6%           | 0.0%           | 0.0%           | 0.0%           | 0.0%  | 0.0%  |
| tr F1SKI2 F1SKI2 |         | 2                | 2          | 0          | 0              | 0              | 0              | 0              | 0              | 2          | 7          | 0              | 0              | 0              | 0              | 0                 | 0          | 2.1%       | 1.3%           | 0.0%           | 0.0%           | 0.0%           | 0.0%  | 0.0%  |
| tr F1RRA0 F1RRA0 |         | 6                | 0          | 0          | 0              | 0              | 0              | 0              | 0              | 9          | 0          | 0              | 0              | 0              | 0              | 0                 | 0          | 7.6%       | 0.0%           | 0.0%           | 0.0%           | 0.0%           | 0.0%  | 0.0%  |
| tr F1RTY7 F1RTY7 |         | 6                | 1          | 0          | 0              | 0              | 0              | 0              | 0              | 7          | 2          | 0              | 0              | 0              | 0              | 0                 | 0          | 17.9%      | 3.7%           | 0.0%           | 0.0%           | 0.0%           | 0.0%  | 0.0%  |
| tr F1RG44 F1RG44 |         | 6                | 1          | 0          | 0              | 0              | 0              | 0              | 0              | 8          | 1          | 0              | 0              | 0              | 0              | 0                 | 0          | 14.4%      | 1.8%           | 0.0%           | 0.0%           | 0.0%           | 0.0%  | 0.0%  |
| tr I3LEI5 I3LEI5 |         | 3                | 0          | 0          | 0              | 0              | 0              | 0              | 0              | 9          | 0          | 0              | 0              | 0              | 0              | 0                 | 0          | 6.5%       | 0.0%           | 0.0%           | 0.0%           | 0.0%           | 0.0%  | 0.0%  |
| tr I3LUG7 I3LUG7 |         | 8                | 0          | 0          | 0              | 0              | 0              | 0              | 0              | 9          | 0          | 0              | 0              | 0              | 0              | 0                 | 0          | 10.7%      | 0.0%           | 0.0%           | 0.0%           | 0.0%           | 0.0%  | 0.0%  |
| tr F1SNS1 F1SNS1 |         | 7                | 2          | 0          | 0              | 0              | 0              | 0              | 0              | 7          | 2          | 0              | 0              | 0              | 0              | 0                 | 0          | 16.4%      | 4.1%           | 0.0%           | 0.0%           | 0.0%           | 0.0%  | 0.0%  |
| tr F1S279 F1S279 |         | 2                | 1          | 0          | 0              | 0              | 0              | 0              | 0              | 4          | 5          | 0              | 0              | 0              | 0              | 0                 | 0          | 6.4%       | 2.8%           | 0.0%           | 0.0%           | 0.0%           | 0.0%  | 0.0%  |
| tr K7GRW0 K7GRW0 |         | 0                | 1          | 0          | 0              | 0              | 0              | 0              | 0              | 0          | 9          | 0              | 0              | 0              | 0              | 0                 | 0          | 0.0%       | 5.9%           | 0.0%           | 0.0%           | 0.0%           | 0.0%  | 0.0%  |
| tr F1RT23 F1RT23 |         | 0                | 1          | 0          | 0              | 0              | 0              | 0              | 0              | 0          | 9          | 0              | 0              | 0              | 0              | 0                 | 0          | 0.0%       | 1.8%           | 0.0%           | 0.0%           | 0.0%           | 0.0%  | 0.0%  |
| tr F1S4S5 F1S4S5 |         | 0                | 1          | 0          | 0              | 0              | 0              | 0              | 0              | 0          | 9          | 0              | 0              | 0              | 0              | 0                 | 0          | 0.0%       | 1.9%           | 0.0%           | 0.0%           | 0.0%           | 0.0%  | 0.0%  |
| tr F1RIU1 F1RIU1 |         | 1                | 1          | 0          | 0              | 0              | 0              | 0              | 0              | 1          | 8          | 0              | 0              | 0              | 0              | 0                 | 0          | 5.3%       | 5.3%           | 0.0%           | 0.0%           | 0.0%           | 0.0%  | 0.0%  |
| tr F1S6T0 F1S6T0 |         | 0                | 1          | 0          | 0              | 0              | 0              | 0              | 0              | 0          | 9          | 0              | 0              | 0              | 0              | 0                 | 0          | 0.0%       | 1.3%           | 0.0%           | 0.0%           | 0.0%           | 0.0%  | 0.0%  |
| tr F1S390 F1S390 |         | 1                | 2          | 0          | 0              | 0              | 0              | 0              | 0              | 3          | 6          | 0              | 0              | 0              | 0              | 0                 | 0          | 1.7%       | 4.2%           | 0.0%           | 0.0%           | 0.0%           | 0.0%  | 0.0%  |
| tr I3LTC4 I3LTC4 |         | 0                | 1          | 0          | 0              | 0              | 0              | 0              | 0              | 0          | 9          | 0              | 0              | 0              | 0              | 0                 | 0          | 0.0%       | 4.8%           | 0.0%           | 0.0%           | 0.0%           | 0.0%  | 0.0%  |
| tr I3LGI6 I3LGI6 |         | 3                | 2          | 1          | 0              | 0              | 0              | 0              | 0              | 4          | 5          | 1              | 0              | 0              | 0              | 0                 | 0          | 10.4%      | 4.8%           | 2.2%           | 0.0%           | 0.0%           | 0.0%  | 0.0%  |
| tr F1RW03 F1RW03 |         | 4                | 1          | 1          | 0              | 0              | 0              | 0              | 0              | 4          | 5          | 1              | 0              | 0              | 0              | 0                 | 0          | 9.7%       | 1.8%           | 4.7%           | 0.0%           | 0.0%           | 0.0%  | 0.0%  |
| tr F1S5H7 F1S5H7 |         | 4                | 2          | 1          | 0              | 0              | 0              | 0              | 0              | 5          | 4          | 1              | 0              | 0              | 0              | 0                 | 0          | 10.5%      | 3.6%           | 2.1%           | 0.0%           | 0.0%           | 0.0%  | 0.0%  |
| tr I3L8B8 I3L8B8 |         | 3                | 2          | 1          | 0              | 0              | 0              | 0              | 0              | 4          | 5          | 1              | 0              | 0              | 0              | 0                 | 0          | 11.5%      | 5.3%           | 2.5%           | 0.0%           | 0.0%           | 0.0%  | 0.0%  |
| tr D2KPI8 D2KPI8 |         | 5                | 0          | 1          | 0              | 0              | 0              | 0              | 0              | 9          | 0          | 1              | 0              | 0              | 0              | 0                 | 0          | 17.1%      | 0.0%           | 3.7%           | 0.0%           | 0.0%           | 0.0%  | 0.0%  |
| tr I3LGP6 I3LGP6 |         | 2                | 2          | 1          | 0              | 0              | 0              | 0              | 0              | 5          | 4          | 1              | 0              | 0              | 0              | 0                 | 0          | 7.2%       | 3.5%           | 3.5%           | 0.0%           | 0.0%           | 0.0%  | 0.0%  |
| tr F1SKL8 F1SKL8 |         | 4                | 1          | 1          | 0              | 0              | 0              | 0              | 0              | 7          | 2          | 1              | 0              | 0              | 0              | 0                 | 0          | 17.9%      | 3.3%           | 2.4%           | 0.0%           | 0.0%           | 0.0%  | 0.0%  |
| tr K7GMX6 K7GMX6 |         | 2                | 2          | 1          | 0              | 0              | 0              | 0              | 0              | 3          | 6          | 1              | 0              | 0              | 0              | 0                 | 0          | 7.6%       | 4.0%           | 2.2%           | 0.0%           | 0.0%           | 0.0%  | 0.0%  |
| tr I3LUL6 I3LUL6 |         | 3                | 0          | 1          | 0              | 0              | 0              | 0              | 0              | 9          | 0          | 2              | 0              | 0              | 0              | 0                 | 0          | 21.8%      | 0.0%           | 9.0%           | 0.0%           | 0.0%           | 0.0%  | 0.0%  |
| tr F1SDY8 F1SDY8 |         | 2                | 2          | 1          | 0              | 0              | 0              | 0              | 0              | 2          | 7          | 2              | 0              | 0              | 0              | 0                 | 0          | 3.8%       | 3.3%           | 2.3%           | 0.0%           | 0.0%           | 0.0%  | 0.0%  |
| tr C5I4T6 C5I4T6 |         | 6                | 1          | 2          | 0              | 0              | 0              | 0              | 0              | 8          | 1          | 2              | 0              | 0              | 0              | 0                 | 0          | 18.6%      | 1.4%           | 5.6%           | 0.0%           | 0.0%           | 0.0%  | 0.0%  |
| tr F1RT21 F1RT21 |         | 3                | 1          | 1          | 0              | 0              | 0              | 0              | 0              | 6          | 3          | 3              | 0              | 0              | 0              | 0                 | 0          | 11.3%      | 9.4%           | 7.5%           | 0.0%           | 0.0%           | 0.0%  | 0.0%  |
| tr F1STS4 F1STS4 |         | 6                | 0          | 1          | 0              | 0              | 0              | 0              | 0              | 9          | 0          | 3              | 0              | 0              | 0              | 0                 | 0          | 24.6%      | 0.0%           | 3.3%           | 0.0%           | 0.0%           | 0.0%  | 0.0%  |
| tr I3LUD5 I3LUD5 |         | 2                | 0          | 1          | 0              | 0              | 0              | 0              | 0              | 9          | 0          | 3              | 0              | 0              | 0              | 0                 | 0          | 17.8%      | 0.0%           | 9.8%           | 0.0%           | 0.0%           | 0.0%  | 0.0%  |
| tr F1RKJ9 F1RKJ9 |         | 6                | 0          | 1          | 0              | 0              | 0              | 0              | 0              | 9          | 0          | 5              | 0              | 0              | 0              | 0                 | 0          | 21.5%      | 0.0%           | 4.7%           | 0.0%           | 0.0%           | 0.0%  | 0.0%  |
| tr F1SP98 F1SP98 |         | 5                | 0          | 1          | 0              | 0              | 0              | 0              | 0              | 9          | 0          | 7              | 0              | 0              | 0              | 0                 | 0          | 15.9%      | 0.0%           | 3.9%           | 0.0%           | 0.0%           | 0.0%  | 0.0%  |
| tr I3LLD7 I3LLD7 |         | 3                | 1          | 1          | 0              | 0              | 0              | 0              | 0              | 8          | 1          | 7              | 0              | 0              | 0              | 0                 | 0          | 28.3%      | 9.0%           | 11.7%          | 0.0%           | 0.0%           | 0.0%  | 0.0%  |
| tr K7GNL4 K7GNL4 |         | 4                | 2          | 2          | 0              | 0              | 0              | 0              | 0              |            |            |                |                |                |                |                   |            |            |                |                |                |                |       |       |

| Accession        | Sample# | Peptide Count |            |            |                |                |                |                | Spectral Count |            |            |                |                |                |                |                | Sequence Coverage |            |            |                |                |                |                |                |       |
|------------------|---------|---------------|------------|------------|----------------|----------------|----------------|----------------|----------------|------------|------------|----------------|----------------|----------------|----------------|----------------|-------------------|------------|------------|----------------|----------------|----------------|----------------|----------------|-------|
|                  |         | Whole Cell    | Whole Cell | Whole Cell | Cilia Fraction | Cilia Fraction | Cilia Fraction | Cilia Fraction | Whole Cell     | Whole Cell | Whole Cell | Cilia Fraction | Whole Cell        | Whole Cell | Whole Cell | Cilia Fraction |       |
|                  |         | 1             | 2          | 6          | 4              | 3              | 5              | 7              | 8              | 1          | 2          | 6              | 4              | 3              | 5              | 7              | 8                 | 1          | 2          | 6              | 4              | 3              | 5              | 7              | 8     |
| tr K7GLS2 K7GLS2 |         | 1             | 1          | 0          | 0              | 0              | 0              | 1              | 0              | 4          | 4          | 0              | 0              | 0              | 0              | 24             | 0                 | 15.7%      | 9.0%       | 0.0%           | 0.0%           | 0.0%           | 0.0%           | 9.0%           | 0.0%  |
| tr I3L920 I3L920 |         | 4             | 2          | 3          | 0              | 0              | 0              | 3              | 3              | 4          | 4          | 12             | 0              | 0              | 0              | 24             | 19                | 26.2%      | 8.8%       | 9.8%           | 0.0%           | 0.0%           | 0.0%           | 21.3%          | 22.6% |
| tr F1RM62 F1RM62 |         | 4             | 1          | 1          | 0              | 0              | 0              | 3              | 2              | 7          | 1          | 6              | 0              | 0              | 0              | 13             | 14                | 36.8%      | 8.6%       | 6.1%           | 0.0%           | 0.0%           | 0.0%           | 20.9%          | 12.9% |
| tr F1SQI6 F1SQI6 |         | 3             | 1          | 1          | 0              | 0              | 0              | 1              | 2              | 3          | 5          | 2              | 0              | 0              | 0              | 1              | 17                | 5.5%       | 1.1%       | 3.1%           | 0.0%           | 0.0%           | 0.0%           | 2.6%           | 5.3%  |
| tr F1S733 F1S733 |         | 7             | 0          | 2          | 0              | 0              | 0              | 0              | 8              | 8          | 0          | 5              | 0              | 0              | 0              | 0              | 21                | 15.0%      | 0.0%       | 6.5%           | 0.0%           | 0.0%           | 0.0%           | 0.0%           | 14.2% |
| tr K7GRX5 K7GRX5 |         | 2             | 1          | 0          | 0              | 0              | 0              | 0              | 2              | 7          | 1          | 0              | 0              | 0              | 0              | 0              | 9                 | 19.4%      | 19.4%      | 0.0%           | 0.0%           | 0.0%           | 0.0%           | 0.0%           | 19.4% |
| tr K7GQD9 K7GQD9 |         | 2             | 1          | 0          | 0              | 0              | 0              | 0              | 2              | 7          | 1          | 0              | 0              | 0              | 0              | 0              | 9                 | 16.9%      | 16.9%      | 0.0%           | 0.0%           | 0.0%           | 0.0%           | 0.0%           | 16.9% |
| tr K7GMA5 K7GMA5 |         | 2             | 1          | 0          | 0              | 0              | 0              | 0              | 2              | 7          | 1          | 0              | 0              | 0              | 0              | 0              | 9                 | 17.4%      | 17.4%      | 0.0%           | 0.0%           | 0.0%           | 0.0%           | 0.0%           | 17.4% |
| tr F1RLJ4 F1RLJ4 |         | 4             | 1          | 1          | 0              | 0              | 0              | 1              | 2              | 6          | 2          | 9              | 0              | 0              | 0              | 8              | 11                | 18.7%      | 5.8%       | 3.7%           | 0.0%           | 0.0%           | 0.0%           | 3.7%           | 15.9% |
| tr F1S8P9 F1S8P9 |         | 2             | 0          | 3          | 0              | 0              | 0              | 0              | 6              | 8          | 0          | 11             | 0              | 0              | 0              | 0              | 21                | 7.0%       | 0.0%       | 7.3%           | 0.0%           | 0.0%           | 0.0%           | 0.0%           | 16.8% |
| tr F1RQ14 F1RQ14 |         | 6             | 0          | 3          | 0              | 0              | 0              | 1              | 3              | 8          | 0          | 15             | 0              | 0              | 0              | 9              | 16                | 29.6%      | 0.0%       | 11.7%          | 0.0%           | 0.0%           | 0.0%           | 5.3%           | 12.6% |
| tr K7GM22 K7GM22 |         | 3             | 1          | 0          | 0              | 0              | 0              | 0              | 2              | 7          | 1          | 0              | 0              | 0              | 0              | 0              | 8                 | 27.3%      | 27.3%      | 0.0%           | 0.0%           | 0.0%           | 0.0%           | 0.0%           | 27.3% |
| tr I3LDM5 I3LDM5 |         | 5             | 0          | 1          | 0              | 0              | 0              | 1              | 1              | 8          | 0          | 2              | 0              | 0              | 0              | 5              | 2                 | 9.9%       | 0.0%       | 2.4%           | 0.0%           | 0.0%           | 0.0%           | 2.4%           | 2.7%  |
| tr I3LC63 I3LC63 |         | 5             | 0          | 1          | 0              | 0              | 0              | 1              | 1              | 8          | 0          | 2              | 0              | 0              | 0              | 5              | 2                 | 10.0%      | 0.0%       | 2.5%           | 0.0%           | 0.0%           | 0.0%           | 2.5%           | 2.7%  |
| tr I3LR43 I3LR43 |         | 4             | 0          | 1          | 0              | 0              | 0              | 1              | 2              | 8          | 0          | 2              | 0              | 0              | 0              | 1              | 6                 | 26.5%      | 0.0%       | 11.4%          | 0.0%           | 0.0%           | 0.0%           | 11.4%          | 9.6%  |
| P34934           |         | 3             | 0          | 2          | 0              | 0              | 0              | 1              | 1              | 8          | 0          | 20             | 0              | 0              | 0              | 16             | 3                 | 5.5%       | 0.0%       | 5.5%           | 0.0%           | 0.0%           | 0.0%           | 3.2%           | 3.2%  |
| tr F1SE87 F1SE87 |         | 3             | 0          | 1          | 0              | 0              | 0              | 2              | 2              | 8          | 0          | 16             | 0              | 0              | 0              | 7              | 9                 | 26.8%      | 0.0%       | 8.9%           | 0.0%           | 0.0%           | 0.0%           | 15.1%          | 15.1% |
| Q56P28           |         | 4             | 0          | 1          | 0              | 0              | 0              | 1              | 0              | 8          | 0          | 14             | 0              | 0              | 0              | 14             | 0                 | 10.6%      | 0.0%       | 10.1%          | 0.0%           | 0.0%           | 0.0%           | 10.1%          | 0.0%  |
| tr A5D9J0 A5D9J0 |         | 3             | 0          | 0          | 0              | 0              | 0              | 0              | 2              | 8          | 0          | 0              | 0              | 0              | 0              | 0              | 5                 | 54.0%      | 0.0%       | 0.0%           | 0.0%           | 0.0%           | 0.0%           | 0.0%           | 44.0% |
| tr I3LAI3 I3LAI3 |         | 3             | 1          | 1          | 0              | 0              | 0              | 1              | 0              | 4          | 4          | 2              | 0              | 0              | 0              | 5              | 0                 | 13.6%      | 11.4%      | 11.4%          | 0.0%           | 0.0%           | 0.0%           | 13.6%          | 0.0%  |
| tr F1SIU8 F1SIU8 |         | 4             | 1          | 0          | 0              | 0              | 0              | 0              | 1              | 7          | 1          | 0              | 0              | 0              | 0              | 0              | 3                 | 8.9%       | 3.6%       | 0.0%           | 0.0%           | 0.0%           | 0.0%           | 0.0%           | 3.1%  |
| tr F1SJH8 F1SJH8 |         | 4             | 1          | 0          | 0              | 0              | 0              | 0              | 1              | 7          | 1          | 0              | 0              | 0              | 0              | 0              | 3                 | 11.9%      | 4.8%       | 0.0%           | 0.0%           | 0.0%           | 0.0%           | 0.0%           | 4.1%  |
| tr K7GPB8 K7GPB8 |         | 2             | 2          | 1          | 0              | 0              | 0              | 1              | 0              | 4          | 4          | 1              | 0              | 0              | 0              | 3              | 0                 | 6.6%       | 7.7%       | 4.6%           | 0.0%           | 0.0%           | 0.0%           | 4.0%           | 0.0%  |
| tr F1RZK5 F1RZK5 |         | 2             | 2          | 1          | 0              | 0              | 0              | 1              | 0              | 4          | 4          | 1              | 0              | 0              | 0              | 3              | 0                 | 6.6%       | 7.7%       | 4.6%           | 0.0%           | 0.0%           | 0.0%           | 4.0%           | 0.0%  |
| tr F1RTV1 F1RTV1 |         | 5             | 1          | 1          | 0              | 0              | 0              | 1              | 1              | 7          | 1          | 5              | 0              | 0              | 0              | 3              | 1                 | 13.2%      | 2.4%       | 6.1%           | 0.0%           | 0.0%           | 0.0%           | 2.0%           | 2.0%  |
| tr F1RTV4 F1RTV4 |         | 5             | 1          | 1          | 0              | 0              | 0              | 1              | 1              | 7          | 1          | 5              | 0              | 0              | 0              | 3              | 1                 | 13.7%      | 2.5%       | 6.4%           | 0.0%           | 0.0%           | 0.0%           | 2.1%           | 2.1%  |
| tr K7GLU1 K7GLU1 |         | 2             | 2          | 0          | 0              | 0              | 0              | 0              | 1              | 3          | 5          | 0              | 0              | 0              | 0              | 0              | 2                 | 3.0%       | 3.1%       | 0.0%           | 0.0%           | 0.0%           | 0.0%           | 0.0%           | 1.2%  |
| tr I3LNV3 I3LNV3 |         | 2             | 0          | 4          | 0              | 0              | 0              | 0              | 1              | 8          | 0          | 5              | 0              | 0              | 0              | 0              | 3                 | 6.4%       | 0.0%       | 11.2%          | 0.0%           | 0.0%           | 0.0%           | 0.0%           | 1.8%  |
| tr F1S3G5 F1S3G5 |         | 4             | 1          | 2          | 0              | 0              | 0              | 1              | 1              | 7          | 1          | 6              | 0              | 0              | 0              | 1              | 2                 | 36.2%      | 3.7%       | 9.2%           | 0.0%           | 0.0%           | 0.0%           | 11.7%          | 11.7% |
| tr I3LN21 I3LN21 |         | 6             | 1          | 1          | 0              | 0              | 0              | 1              | 1              | 7          | 1          | 2              | 0              | 0              | 0              | 1              | 1                 | 22.5%      | 2.9%       | 6.1%           | 0.0%           | 0.0%           | 0.0%           | 6.1%           | 7.2%  |
| tr I3LSU8 I3LSU8 |         | 4             | 0          | 3          | 0              | 0              | 0              | 0              | 1              | 8          | 0          | 8              | 0              | 0              | 0              | 0              | 3                 | 8.3%       | 0.0%       | 10.7%          | 0.0%           | 0.0%           | 0.0%           | 0.0%           | 7.4%  |
| tr F1SVB2 F1SVB2 |         | 4             | 0          | 1          | 0              | 0              | 0              | 0              | 1              | 8          | 0          | 3              | 0              | 0              | 0              | 0              | 2                 | 11.1%      | 0.0%       | 1.5%           | 0.0%           | 0.0%           | 0.0%           | 0.0%           | 4.9%  |
| tr I3LDQ1 I3LDQ1 |         | 3             | 1          | 1          | 0              | 0              | 0              | 0              | 1              | 6          | 2          | 6              | 0              | 0              | 0              | 0              | 2                 | 39.9%      | 9.8%       | 9.8%           | 0.0%           | 0.0%           | 0.0%           | 0.0%           | 17.5% |
| tr K7GSP4 K7GSP4 |         | 1             | 0          | 0          | 0              | 0              | 0              | 0              | 1              | 8          | 0          | 0              | 0              | 0              | 0              | 0              | 1                 | 24.3%      | 0.0%       | 0.0%           | 0.0%           | 0.0%           | 0.0%           | 0.0%           | 24.3% |
| tr K7GRD4 K7GRD4 |         | 1             | 0          | 0          | 0              | 0              | 0              | 0              | 1              | 8          | 0          | 0              | 0              | 0              | 0              | 0              | 1                 | 21.5%      | 0.0%       | 0.0%           | 0.0%           | 0.0%           | 0.0%           | 0.0%           | 21.5% |
| Q6QA76           |         | 1             | 0          | 0          | 0              | 0              | 0              | 0              | 1              | 8          | 0          | 0              | 0              | 0              | 0              | 0              | 1                 | 18.6%      | 0.0%       | 0.0%           | 0.0%           | 0.0%           | 0.0%           | 0.0%           | 18.6% |
| tr K7GNX1 K7GNX1 |         | 1             | 0          | 0          | 0              | 0              | 0              | 0              | 1              | 8          | 0          | 0              | 0              | 0              | 0              | 0              | 1                 | 19.1%      | 0.0%       | 0.0%           | 0.0%           | 0.0%           | 0.0%           | 0.0%           | 19.1% |
| tr F1SQK5 F1SQK5 |         | 2             | 0          | 0          | 0              | 0              | 0              | 0              | 1              | 8          | 0          | 0              | 0              | 0              | 0              | 0              | 1                 | 27.5%      | 0.0%       | 0.0%           | 0.0%           | 0.0%           | 0.0%           | 0.0%           | 14.0% |
| tr I3LRX9 I3LRX9 |         | 6             | 1          | 3          | 0              | 0              | 0              | 1              | 0              | 7          | 1          | 17             | 0              | 0              | 0              | 2              | 0                 | 71.1%      | 40.8%      | 71.1%          | 0.0%           | 0.0%           | 0.0%           | 40.8%          | 0.0%  |
| tr F1RJ35 F1RJ35 |         | 1             | 1          | 0          | 0              | 0              | 0              | 0              | 0              | 1          | 7          | 0              | 0              | 0              | 0              | 0              | 0                 | 3.5%       | 3.5%       | 0.0%           | 0.0%           | 0.0%           | 0.0%           | 0.0%           | 0.0%  |
| tr F1S396 F1S396 |         | 4             | 0          | 0          | 0              | 0              | 0              | 0              | 0              | 8          | 0          | 0              | 0              | 0              | 0              | 0              | 0                 | 9.3%       | 0.0%       | 0.0%           | 0.0%           | 0.0%           | 0.0%           | 0.0%           | 0.0%  |
| tr F1RY52 F1RY52 |         | 3             | 0          | 0          | 0              | 0              | 0              | 0              | 0              | 8          | 0          | 0              | 0              | 0              | 0              | 0              | 0                 | 7.5%       | 0.0%       | 0.0%           | 0.0%           | 0.0%           | 0.0%           | 0.0%           | 0.0%  |
| tr F2Z591 F2Z591 |         | 4             | 1          | 0          | 0              | 0              | 0              | 0              | 0              | 6          | 2          | 0              | 0              | 0              | 0              | 0              | 0                 | 20.8%      | 4.4%       | 0.0%           | 0.0%           | 0.0%           | 0.0%           | 0.0%           | 0.0%  |
| tr F1SP57 F1SP57 |         | 0             | 1          | 0          | 0              | 0              | 0              | 0              | 0              | 0          | 8          | 0              | 0              | 0              | 0              | 0              | 0                 | 0.0%       | 1.5%       | 0.0%           | 0.0%           | 0.0%           | 0.0%           | 0.0%           | 0.0%  |
| tr F1SAB2 F1SAB2 |         | 3             | 0          | 0          | 0              | 0              | 0              | 0              | 0              | 8          | 0          | 0              | 0              | 0              | 0              | 0              | 0                 | 9.3%       | 0.0%       | 0.0%           | 0.0%           | 0.0%           | 0.0%           | 0.0%           | 0.0%  |
| tr F1SSE6 F1SSE6 |         | 4             | 2          | 0          | 0              | 0              | 0              | 0              | 0              | 5          | 3          | 0              | 0              | 0              | 0              | 0              | 0                 | 20.4%      | 4.6%       | 0.0%           | 0.0%           | 0.0%           | 0.0%           | 0.0%           | 0.0%  |
| tr F1RYU6 F1RYU6 |         | 1             | 2          | 0          | 0              | 0              | 0              | 0              | 0              | 2          | 6          | 0              | 0              | 0              | 0              | 0              | 0                 | 2.6%       | 4.5%       | 0.0%           | 0.0%           | 0.0%           | 0.0%           | 0.0%           | 0.0%  |
| tr K7GLU3 K7GLU3 |         | 0             | 1          | 0          | 0              | 0              | 0              | 0              | 0              | 0          | 8          | 0              | 0              | 0              | 0              | 0              | 0                 | 0.0%       | 3.1%       | 0.0%           | 0.0%           | 0.0%           | 0.0%           | 0.0%           | 0.0%  |
| tr F1RFF5 F1RFF5 |         | 4             | 0          | 0          | 0              | 0              | 0              | 0              | 0              | 8          | 0          | 0              | 0              | 0              | 0              | 0              | 0                 | 18.0%      | 0.0%       | 0.0%           | 0.0%           | 0.0%           | 0.0%           | 0.0%           | 0.0%  |
| tr F1SOH7 F1SOH7 |         | 2             | 2          | 0          | 0              | 0              | 0              | 0              | 0              | 2          | 6          | 0              | 0              | 0              | 0              | 0              | 0                 | 3.7%       | 6.4%       | 0.0%           | 0.0%           | 0.0%           | 0.0%           | 0.0%           | 0.0%  |
| tr I3LDE2 I3LDE2 |         | 0             | 2          | 0          | 0              | 0              | 0              | 0              | 0              | 0          | 8          | 0              | 0              | 0              | 0              | 0              | 0                 | 0.0%       | 13.1%      | 0.0%           | 0.0%           | 0.0%           | 0.0%           | 0.0%           | 0.0%  |
| tr A7YX22 A7YX22 |         | 3             | 2          | 0          | 0              | 0              | 0              | 0              | 0              | 3          | 5          | 0              | 0              | 0              | 0              | 0              | 0                 | 11.7%      | 10.5%      | 0.0%           | 0.0%           | 0.0%           | 0.0%           | 0.0%           | 0.0%  |
| tr F1SNB7 F1SNB7 |         | 4             | 1          | 0          | 0              | 0              | 0              | 0              | 0              | 7          | 1          | 0              | 0              | 0              | 0              | 0              | 0                 | 14.1%      | 2.8%       | 0.0%           | 0.0%           | 0.0%           | 0.0%           | 0.0%           | 0.0%  |
| Q9TU20           |         | 3             | 2          | 0          | 0              | 0              | 0              | 0              | 0              | 4          | 4          | 0              | 0              | 0              | 0              | 0              | 0                 | 6.6%       | 2.7%       | 0.0%           | 0.0%           | 0.0%           | 0.0%           | 0.0%           | 0.0%  |
| tr F1SQH6 F1SQH6 |         | 3             | 2          | 0          | 0              | 0              | 0              | 0              | 0              | 5          | 3          | 0              | 0              | 0              | 0              | 0              | 0                 | 7.7%       | 3.9%       | 0.0%           | 0.0%           | 0.0%           | 0.0%           | 0.0%           | 0.0%  |
| tr F1STU5 F1STU5 |         | 1             | 2          | 0          | 0              | 0              | 0              | 0              | 0              | 1          | 7          | 0              | 0              | 0              | 0              | 0              | 0                 | 8.8%       | 8.8%       | 0.0%           | 0.0%           | 0.0%           | 0.0%           | 0.0%           | 0.0%  |
| P19205           |         | 0             | 1          | 0          | 0              | 0              | 0              | 0              | 0              | 0          | 8          | 0              | 0              | 0              | 0              | 0              | 0                 | 0.0%       | 1.5%       | 0.0%           | 0.0%           | 0.0%           | 0.0%           | 0.0%           | 0.0%  |
| tr F1SML7 F1SML7 |         | 6             | 0          | 0          | 0              | 0              | 0              | 0              | 0              | 8          | 0          | 0              | 0              | 0              | 0              | 0              | 0                 | 18.9%      | 0.0%       | 0.0%           | 0.0%           | 0.0%           | 0.0%           | 0.0%           | 0.0%  |
| tr F1RNB0 F1RNB0 |         | 3             | 2          | 0          | 0              | 0              | 0              | 0              | 0              | 3          | 5          | 0              | 0              | 0              | 0              | 0              | 0                 | 4.3%       | 1.2%       | 0.0%           | 0.0%           | 0.0%           | 0.0%           | 0.0%           | 0.0%  |
| tr I3LFX8 I3LFX8 |         | 0             | 1          | 0          | 0              | 0              | 0              | 0              | 0              | 0          | 8          | 0              | 0              | 0              | 0              | 0              | 0                 | 0.0%       | 1.6%       | 0.0%           | 0.0%           | 0.0%           | 0.0%           | 0.0%           | 0.0%  |
| tr F1RK86 F1RK86 |         | 2             | 0          | 0          | 0              | 0              | 0              | 0              | 0              | 8          | 0          | 0              | 0              | 0              | 0              | 0              | 0                 | 6.5%       | 0.0%       | 0.0%           | 0.0%           | 0.0%           | 0.0%           | 0.0%           | 0.0%  |
| tr I3LKD4 I3LKD4 |         | 3             | 0          | 0          | 0              | 0              | 0              | 0              | 0              | 8          | 0          | 0              | 0              | 0              | 0              | 0              | 0                 | 11.7%      | 0.0%       | 0.0%           | 0.0%           | 0.0%           | 0.0%           | 0.0%           | 0.0%  |
| tr F1SRK2 F1SRK2 |         | 3             | 1          | 0          | 0              | 0              | 0              | 0              | 0              | 3          |            |                |                |                |                |                |                   |            |            |                |                |                |                |                |       |

| Accession        | Sample# | Peptide Count |            |            |                |                |                |                | Spectral Count |            |            |                |                |                |                |                | Sequence Coverage |            |            |                |                |                |                |                |
|------------------|---------|---------------|------------|------------|----------------|----------------|----------------|----------------|----------------|------------|------------|----------------|----------------|----------------|----------------|----------------|-------------------|------------|------------|----------------|----------------|----------------|----------------|----------------|
|                  |         | Whole Cell    | Whole Cell | Whole Cell | Cilia Fraction | Cilia Fraction | Cilia Fraction | Cilia Fraction | Whole Cell     | Whole Cell | Whole Cell | Cilia Fraction | Whole Cell        | Whole Cell | Whole Cell | Cilia Fraction |
|                  |         | 1             | 2          | 6          | 4              | 3              | 5              | 7              | 1              | 2          | 6          | 4              | 3              | 5              | 7              | 8              | 1                 | 2          | 6          | 4              | 3              | 5              | 7              | 8              |
| tr F1S0M9 F1S0M9 |         | 4             | 1          | 0          | 0              | 0              | 0              | 0              | 7              | 1          | 0          | 0              | 0              | 0              | 0              | 0              | 12.9%             | 3.9%       | 0.0%       | 0.0%           | 0.0%           | 0.0%           | 0.0%           | 0.0%           |
| tr F1RRB4 F1RRB4 |         | 1             | 3          | 1          | 0              | 0              | 0              | 0              | 1              | 7          | 1          | 0              | 0              | 0              | 0              | 0              | 1.5%              | 5.5%       | 2.8%       | 0.0%           | 0.0%           | 0.0%           | 0.0%           | 0.0%           |
| tr I3LFK0 I3LFK0 |         | 2             | 3          | 1          | 0              | 0              | 0              | 0              | 3              | 5          | 1          | 0              | 0              | 0              | 0              | 0              | 7.2%              | 8.8%       | 3.8%       | 0.0%           | 0.0%           | 0.0%           | 0.0%           | 0.0%           |
| tr F1SER1 F1SER1 |         | 3             | 1          | 1          | 0              | 0              | 0              | 0              | 7              | 1          | 1          | 0              | 0              | 0              | 0              | 0              | 9.1%              | 5.3%       | 3.8%       | 0.0%           | 0.0%           | 0.0%           | 0.0%           | 0.0%           |
| tr K7GKC7 K7GKC7 |         | 3             | 1          | 1          | 0              | 0              | 0              | 0              | 7              | 1          | 2          | 0              | 0              | 0              | 0              | 0              | 20.1%             | 8.7%       | 4.4%       | 0.0%           | 0.0%           | 0.0%           | 0.0%           | 0.0%           |
| tr F1STV0 F1STV0 |         | 2             | 0          | 1          | 0              | 0              | 0              | 0              | 8              | 0          | 2          | 0              | 0              | 0              | 0              | 0              | 3.9%              | 0.0%       | 2.8%       | 0.0%           | 0.0%           | 0.0%           | 0.0%           | 0.0%           |
| tr K7GSK7 K7GSK7 |         | 3             | 1          | 1          | 0              | 0              | 0              | 0              | 7              | 1          | 2          | 0              | 0              | 0              | 0              | 0              | 23.0%             | 10.0%      | 5.0%       | 0.0%           | 0.0%           | 0.0%           | 0.0%           | 0.0%           |
| tr F1RK53 F1RK53 |         | 6             | 0          | 1          | 0              | 0              | 0              | 0              | 8              | 0          | 3          | 0              | 0              | 0              | 0              | 0              | 27.6%             | 0.0%       | 5.3%       | 0.0%           | 0.0%           | 0.0%           | 0.0%           | 0.0%           |
| tr F1SB38 F1SB38 |         | 3             | 1          | 2          | 0              | 0              | 0              | 0              | 7              | 1          | 3          | 0              | 0              | 0              | 0              | 0              | 7.3%              | 2.7%       | 3.9%       | 0.0%           | 0.0%           | 0.0%           | 0.0%           | 0.0%           |
| tr F1S402 F1S402 |         | 2             | 2          | 2          | 0              | 0              | 0              | 0              | 3              | 5          | 4          | 0              | 0              | 0              | 0              | 0              | 1.1%              | 1.0%       | 0.9%       | 0.0%           | 0.0%           | 0.0%           | 0.0%           | 0.0%           |
| tr F1RQ19 F1RQ19 |         | 2             | 1          | 1          | 0              | 0              | 0              | 0              | 4              | 4          | 4          | 0              | 0              | 0              | 0              | 0              | 15.8%             | 5.9%       | 6.9%       | 0.0%           | 0.0%           | 0.0%           | 0.0%           | 0.0%           |
| tr F1S8E9 F1S8E9 |         | 2             | 1          | 1          | 0              | 0              | 0              | 0              | 7              | 1          | 4          | 0              | 0              | 0              | 0              | 0              | 6.4%              | 2.1%       | 2.5%       | 0.0%           | 0.0%           | 0.0%           | 0.0%           | 0.0%           |
| tr I3LEL9 I3LEL9 |         | 2             | 1          | 3          | 0              | 0              | 0              | 0              | 7              | 1          | 5          | 0              | 0              | 0              | 0              | 0              | 6.6%              | 6.6%       | 11.6%      | 0.0%           | 0.0%           | 0.0%           | 0.0%           | 0.0%           |
| tr F1S2D0 F1S2D0 |         | 4             | 0          | 2          | 0              | 0              | 0              | 0              | 8              | 0          | 5          | 0              | 0              | 0              | 0              | 0              | 16.9%             | 0.0%       | 8.9%       | 0.0%           | 0.0%           | 0.0%           | 0.0%           | 0.0%           |
| tr I3LRW8 I3LRW8 |         | 2             | 1          | 1          | 0              | 0              | 0              | 0              | 5              | 3          | 6          | 0              | 0              | 0              | 0              | 0              | 13.3%             | 4.8%       | 4.3%       | 0.0%           | 0.0%           | 0.0%           | 0.0%           | 0.0%           |
| Q06A98           |         | 2             | 1          | 1          | 0              | 0              | 0              | 0              | 5              | 3          | 6          | 0              | 0              | 0              | 0              | 0              | 11.3%             | 4.1%       | 3.6%       | 0.0%           | 0.0%           | 0.0%           | 0.0%           | 0.0%           |
| tr F1RXG7 F1RXG7 |         | 4             | 0          | 1          | 0              | 0              | 0              | 0              | 8              | 0          | 7          | 0              | 0              | 0              | 0              | 0              | 34.0%             | 0.0%       | 4.7%       | 0.0%           | 0.0%           | 0.0%           | 0.0%           | 0.0%           |
| tr F1RZU5 F1RZU5 |         | 3             | 1          | 4          | 0              | 0              | 0              | 0              | 7              | 1          | 8          | 0              | 0              | 0              | 0              | 0              | 19.6%             | 8.5%       | 12.3%      | 0.0%           | 0.0%           | 0.0%           | 0.0%           | 0.0%           |
| tr I3LV33 I3LV33 |         | 3             | 0          | 1          | 0              | 0              | 0              | 0              | 8              | 0          | 8          | 0              | 0              | 0              | 0              | 0              | 22.8%             | 0.0%       | 15.2%      | 0.0%           | 0.0%           | 0.0%           | 0.0%           | 0.0%           |
| tr I3LBE6 I3LBE6 |         | 3             | 2          | 1          | 0              | 0              | 0              | 0              | 3              | 5          | 8          | 0              | 0              | 0              | 0              | 0              | 9.7%              | 4.9%       | 1.3%       | 0.0%           | 0.0%           | 0.0%           | 0.0%           | 0.0%           |
| tr K7GN50 K7GN50 |         | 4             | 2          | 1          | 0              | 0              | 0              | 0              | 6              | 2          | 21         | 0              | 0              | 0              | 0              | 0              | 19.5%             | 9.7%       | 6.5%       | 0.0%           | 0.0%           | 0.0%           | 0.0%           | 0.0%           |
| tr F1S9I0 F1S9I0 |         | 6             | 0          | 7          | 0              | 0              | 0              | 0              | 8              | 0          | 23         | 0              | 0              | 0              | 0              | 0              | 4.8%              | 0.0%       | 5.7%       | 0.0%           | 0.0%           | 0.0%           | 0.0%           | 0.0%           |
| tr F1STB2 F1STB2 |         | 4             | 0          | 2          | 0              | 0              | 0              | 0              | 8              | 0          | 31         | 0              | 0              | 0              | 0              | 0              | 29.4%             | 0.0%       | 12.3%      | 0.0%           | 0.0%           | 0.0%           | 0.0%           | 0.0%           |
| tr F1RFI8 F1RFI8 |         | 4             | 1          | 2          | 0              | 0              | 0              | 0              | 4              | 4          | 32         | 0              | 0              | 0              | 0              | 0              | 16.5%             | 2.5%       | 4.8%       | 0.0%           | 0.0%           | 0.0%           | 0.0%           | 0.0%           |
| P21753           |         | 2             | 1          | 3          | 0              | 0              | 0              | 0              | 7              | 1          | 49         | 0              | 0              | 0              | 0              | 0              | 31.0%             | 31.0%      | 45.2%      | 0.0%           | 0.0%           | 0.0%           | 0.0%           | 0.0%           |
| tr I3LI48 I3LI48 |         | 5             | 0          | 2          | 0              | 0              | 0              | 0              | 8              | 0          | 50         | 0              | 0              | 0              | 0              | 0              | 56.8%             | 0.0%       | 13.0%      | 0.0%           | 0.0%           | 0.0%           | 0.0%           | 0.0%           |
| tr F1RZN4 F1RZN4 |         | 5             | 1          | 1          | 0              | 0              | 0              | 3              | 6              | 1          | 4          | 0              | 0              | 0              | 18             | 10             | 8.2%              | 1.2%       | 2.1%       | 0.0%           | 0.0%           | 0.0%           | 6.9%           | 2.3%           |
| tr A0ENH4 A0ENH4 |         | 5             | 1          | 1          | 0              | 0              | 0              | 3              | 2              | 6          | 1          | 4              | 0              | 0              | 18             | 10             | 8.2%              | 1.2%       | 2.1%       | 0.0%           | 0.0%           | 0.0%           | 6.9%           | 2.3%           |
| tr F2Z5F3 F2Z5F3 |         | 3             | 1          | 0          | 0              | 0              | 0              | 1              | 5              | 2          | 0          | 0              | 0              | 0              | 11             | 6              | 20.4%             | 5.8%       | 2.0%       | 0.0%           | 0.0%           | 0.0%           | 5.8%           | 6.1%           |
| tr F1SICO F1SICO |         | 4             | 0          | 0          | 0              | 0              | 0              | 2              | 4              | 7          | 0          | 0              | 0              | 0              | 2              | 14             | 10.4%             | 0.0%       | 0.0%       | 0.0%           | 0.0%           | 0.0%           | 6.6%           | 14.4%          |
| tr I3LVD1 I3LVD1 |         | 4             | 0          | 0          | 0              | 0              | 0              | 1              | 4              | 7          | 0          | 0              | 0              | 0              | 1              | 14             | 10.7%             | 0.0%       | 0.0%       | 0.0%           | 0.0%           | 0.0%           | 3.9%           | 14.8%          |
| tr F1SIM3 F1SIM3 |         | 3             | 1          | 2          | 0              | 0              | 0              | 1              | 4              | 4          | 3          | 2              | 0              | 0              | 4              | 12             | 12.5%             | 2.5%       | 5.1%       | 0.0%           | 0.0%           | 0.0%           | 3.2%           | 13.6%          |
| tr K7GNH0 K7GNH0 |         | 3             | 1          | 2          | 0              | 0              | 0              | 1              | 4              | 4          | 3          | 2              | 0              | 0              | 4              | 12             | 12.3%             | 2.4%       | 5.0%       | 0.0%           | 0.0%           | 0.0%           | 3.1%           | 13.4%          |
| tr F1S520 F1S520 |         | 6             | 0          | 3          | 0              | 0              | 0              | 1              | 4              | 7          | 0          | 8              | 0              | 0              | 11             | 14             | 11.4%             | 0.0%       | 4.4%       | 0.0%           | 0.0%           | 0.0%           | 3.3%           | 9.0%           |
| tr I3LS48 I3LS48 |         | 3             | 0          | 0          | 0              | 0              | 0              | 1              | 1              | 7          | 0          | 0              | 0              | 0              | 8              | 3              | 5.9%              | 0.0%       | 0.0%       | 0.0%           | 0.0%           | 0.0%           | 2.1%           | 2.1%           |
| F1SPM8           |         | 3             | 0          | 0          | 0              | 0              | 0              | 1              | 1              | 7          | 0          | 0              | 0              | 0              | 8              | 3              | 5.9%              | 0.0%       | 0.0%       | 0.0%           | 0.0%           | 0.0%           | 2.1%           | 2.1%           |
| tr F1RQZ0 F1RQZ0 |         | 5             | 0          | 1          | 0              | 0              | 0              | 1              | 2              | 7          | 0          | 1              | 0              | 0              | 2              | 5              | 8.9%              | 0.0%       | 2.9%       | 0.0%           | 0.0%           | 0.0%           | 5.8%           | 8.4%           |
| tr F1RWN4 F1RWN4 |         | 2             | 1          | 0          | 0              | 0              | 0              | 0              | 1              | 5          | 2          | 0              | 0              | 0              | 0              | 6              | 21.4%             | 9.5%       | 0.0%       | 0.0%           | 0.0%           | 0.0%           | 0.0%           | 11.9%          |
| tr B6E241 B6E241 |         | 5             | 0          | 1          | 0              | 0              | 0              | 1              | 2              | 7          | 0          | 4              | 0              | 0              | 3              | 6              | 21.2%             | 0.0%       | 4.1%       | 0.0%           | 0.0%           | 0.0%           | 13.4%          | 9.7%           |
| tr F1SSH7 F1SSH7 |         | 5             | 0          | 1          | 0              | 0              | 0              | 0              | 3              | 7          | 0          | 6              | 0              | 0              | 0              | 10             | 27.8%             | 0.0%       | 7.1%       | 0.0%           | 0.0%           | 0.0%           | 0.0%           | 17.4%          |
| tr F1SH28 F1SH28 |         | 2             | 1          | 0          | 0              | 0              | 0              | 1              | 1              | 2          | 5          | 0              | 0              | 0              | 2              | 3              | 5.7%              | 3.1%       | 0.0%       | 0.0%           | 0.0%           | 0.0%           | 5.2%           | 4.6%           |
| tr I3LUE6 I3LUE6 |         | 2             | 1          | 0          | 0              | 0              | 0              | 0              | 2              | 6          | 1          | 0              | 0              | 0              | 0              | 4              | 13.8%             | 13.8%      | 0.0%       | 0.0%           | 0.0%           | 0.0%           | 0.0%           | 13.8%          |
| tr F1SNT0 F1SNT0 |         | 3             | 0          | 1          | 0              | 0              | 0              | 2              | 0              | 7          | 0          | 6              | 0              | 0              | 7              | 0              | 21.0%             | 0.0%       | 8.2%       | 0.0%           | 0.0%           | 0.0%           | 16.4%          | 0.0%           |
| tr F1RIU9 F1RIU9 |         | 4             | 1          | 2          | 0              | 0              | 0              | 0              | 3              | 6          | 1          | 2              | 0              | 0              | 0              | 4              | 11.8%             | 4.6%       | 6.2%       | 0.0%           | 0.0%           | 0.0%           | 0.0%           | 13.0%          |
| tr F1S861 F1S861 |         | 4             | 0          | 0          | 0              | 0              | 0              | 1              | 0              | 7          | 0          | 0              | 0              | 0              | 3              | 0              | 6.6%              | 0.0%       | 0.0%       | 0.0%           | 0.0%           | 0.0%           | 2.7%           | 0.0%           |
| tr F2Z5Q3 F2Z5Q3 |         | 2             | 2          | 0          | 0              | 0              | 0              | 1              | 1              | 2          | 5          | 0              | 0              | 0              | 1              | 2              | 10.9%             | 11.6%      | 0.0%       | 0.0%           | 0.0%           | 0.0%           | 5.1%           | 11.3%          |
| tr K7GPP9 K7GPP9 |         | 2             | 0          | 0          | 0              | 0              | 0              | 0              | 1              | 7          | 0          | 0              | 0              | 0              | 0              | 3              | 24.5%             | 0.0%       | 0.0%       | 0.0%           | 0.0%           | 0.0%           | 0.0%           | 24.5%          |
| tr F1SEH2 F1SEH2 |         | 2             | 0          | 0          | 0              | 0              | 0              | 0              | 1              | 7          | 0          | 0              | 0              | 0              | 0              | 3              | 19.0%             | 0.0%       | 0.0%       | 0.0%           | 0.0%           | 0.0%           | 0.0%           | 19.0%          |
| tr F1SRU2 F1SRU2 |         | 2             | 0          | 2          | 0              | 0              | 0              | 0              | 3              | 7          | 0          | 8              | 0              | 0              | 0              | 5              | 11.1%             | 0.0%       | 10.1%      | 0.0%           | 0.0%           | 0.0%           | 0.0%           | 21.2%          |
| P29269           |         | 4             | 0          | 2          | 0              | 0              | 0              | 0              | 1              | 7          | 0          | 10             | 0              | 0              | 0              | 5              | 26.7%             | 0.0%       | 15.7%      | 0.0%           | 0.0%           | 0.0%           | 0.0%           | 16.3%          |
| tr A9LM01 A9LM01 |         | 2             | 1          | 0          | 0              | 0              | 0              | 0              | 2              | 5          | 2          | 0              | 0              | 0              | 0              | 0              | 20.2%             | 6.3%       | 0.0%       | 0.0%           | 0.0%           | 0.0%           | 0.0%           | 15.2%          |
| tr I3LG43 I3LG43 |         | 3             | 1          | 0          | 0              | 0              | 0              | 0              | 1              | 6          | 1          | 0              | 0              | 0              | 0              | 2              | 14.4%             | 7.0%       | 0.0%       | 0.0%           | 0.0%           | 0.0%           | 0.0%           | 7.6%           |
| O46427           |         | 2             | 2          | 2          | 0              | 0              | 0              | 0              | 1              | 4          | 3          | 14             | 0              | 0              | 0              | 5              | 17.9%             | 7.8%       | 5.4%       | 0.0%           | 0.0%           | 0.0%           | 0.0%           | 10.1%          |
| tr I3LQI9 I3LQI9 |         | 4             | 0          | 3          | 0              | 0              | 0              | 1              | 0              | 7          | 0          | 7              | 0              | 0              | 3              | 0              | 10.0%             | 0.0%       | 10.2%      | 0.0%           | 0.0%           | 0.0%           | 3.9%           | 0.0%           |
| tr F1SIJ2 F1SIJ2 |         | 3             | 0          | 4          | 0              | 0              | 0              | 1              | 1              | 7          | 0          | 12             | 0              | 0              | 0              | 3              | 41.0%             | 0.0%       | 30.8%      | 0.0%           | 0.0%           | 0.0%           | 13.3%          | 12.3%          |
| tr F1SPI1 F1SPI1 |         | 4             | 3          | 1          | 0              | 0              | 0              | 0              | 2              | 4          | 3          | 13             | 0              | 0              | 0              | 0              | 16.0%             | 7.2%       | 2.5%       | 0.0%           | 0.0%           | 0.0%           | 0.0%           | 6.8%           |
| tr I3LPY7 I3LPY7 |         | 5             | 0          | 2          | 0              | 0              | 0              | 1              | 0              | 7          | 0          | 8              | 0              | 0              | 3              | 0              | 20.4%             | 0.0%       | 8.5%       | 0.0%           | 0.0%           | 0.0%           | 5.3%           | 0.0%           |
| tr F1RPD4 F1RPD4 |         | 3             | 1          | 1          | 0              | 0              | 0              | 0              | 1              | 6          | 1          | 4              | 0              | 0              | 0              | 2              | 44.9%             | 7.0%       | 7.5%       | 0.0%           | 0.0%           | 0.0%           | 0.0%           | 17.3%          |
| tr K7GLK3 K7GLK3 |         | 5             | 0          | 6          | 0              | 0              | 0              | 0              | 3              | 7          | 0          | 29             | 0              | 0              | 0              | 6              | 36.9%             | 0.0%       | 25.9%      | 0.0%           | 0.0%           | 0.0%           | 0.0%           | 25.5%          |
| tr F1SQD9 F1SQD9 |         | 4             | 1          | 1          | 0              | 0              | 0              | 0              | 1              | 6          | 1          | 6              | 0              | 0              | 0              | 2              | 18.8%             | 2.9%       | 4.0%       | 0.0%           | 0.0%           | 0.0%           | 0.0%           | 8.3%           |
| tr F1RQB3 F1RQB3 |         | 3             | 1          | 2          | 0              | 0              | 0              | 0              | 1              | 4          | 3          | 20             | 0              | 0              | 0              | 4              | 26.5%             | 6.5%       | 10.3%      | 0.0%           | 0.0%           | 0.0%           | 0.0%           | 6.5%           |
| tr A3RKG5 A3RKG5 |         | 2             | 1          | 0          | 0              | 0              | 0              | 0              | 1              | 5          | 2          | 0              | 0              | 0              | 0              | 1              | 27.3%             | 8.5%       | 0.0%       | 0.0%           | 0.0%           | 0.0%           | 0.0%           | 8.5%           |
| tr I3LS45 I3LS45 |         | 3             | 1          | 0          | 0              | 0              | 0              | 0              | 1              | 3          | 4          | 0              | 0              | 0              | 0              | 1              | 9.1%              | 2.3%       | 0.0%       | 0.0%           | 0.0%           | 0.0%           | 0.0%           | 3.2%           |
| tr F1SR60 F1SR60 |         | 0             | 1          | 0          | 0              | 0              | 0              | 0              | 1              | 0          | 7          | 0              | 0              | 0              | 0              | 0              | 1                 | 0.0%       | 4.2%       | 0.0%           | 0.0%           | 0.0%           | 0.0%           | 4.2%           |
| tr F1SA44 F1SA44 |         | 7             | 0          | 4          | 0              | 0              | 0              | 0              | 1              | 7          | 0          | 9              | 0</            |                |                |                |                   |            |            |                |                |                |                |                |

| Accession        | Sample# | Peptide Count |            |            |                |                |                |                | Spectral Count |            |            |                |                |                |                | Sequence Coverage |            |            |                |                |                |                |      |
|------------------|---------|---------------|------------|------------|----------------|----------------|----------------|----------------|----------------|------------|------------|----------------|----------------|----------------|----------------|-------------------|------------|------------|----------------|----------------|----------------|----------------|------|
|                  |         | Whole Cell    | Whole Cell | Whole Cell | Cilia Fraction | Cilia Fraction | Cilia Fraction | Cilia Fraction | Whole Cell     | Whole Cell | Whole Cell | Cilia Fraction | Cilia Fraction | Cilia Fraction | Cilia Fraction | Whole Cell        | Whole Cell | Whole Cell | Cilia Fraction | Cilia Fraction | Cilia Fraction | Cilia Fraction |      |
|                  |         | 1             | 2          | 6          | 4              | 3              | 5              | 7              | 1              | 2          | 6          | 4              | 3              | 5              | 7              | 1                 | 2          | 6          | 4              | 3              | 5              | 7              | 8    |
| tr F1RS87 F1RS87 |         | 0             | 2          | 0          | 0              | 0              | 0              | 0              | 0              | 7          | 0          | 0              | 0              | 0              | 0              | 0.0%              | 14.0%      | 0.0%       | 0.0%           | 0.0%           | 0.0%           | 0.0%           | 0.0% |
| tr F1RH94 F1RH94 |         | 2             | 1          | 0          | 0              | 0              | 0              | 0              | 6              | 1          | 0          | 0              | 0              | 0              | 0              | 11.7%             | 5.1%       | 0.0%       | 0.0%           | 0.0%           | 0.0%           | 0.0%           | 0.0% |
| tr F1STH9 F1STH9 |         | 1             | 2          | 0          | 0              | 0              | 0              | 0              | 3              | 4          | 0          | 0              | 0              | 0              | 0              | 3.8%              | 2.5%       | 0.0%       | 0.0%           | 0.0%           | 0.0%           | 0.0%           | 0.0% |
| tr K7GRA1 K7GRA1 |         | 4             | 2          | 0          | 0              | 0              | 0              | 0              | 5              | 2          | 0          | 0              | 0              | 0              | 0              | 6.9%              | 4.6%       | 0.0%       | 0.0%           | 0.0%           | 0.0%           | 0.0%           | 0.0% |
| tr F1RU15 F1RU15 |         | 1             | 1          | 0          | 0              | 0              | 0              | 0              | 4              | 3          | 0          | 0              | 0              | 0              | 0              | 6.9%              | 6.9%       | 0.0%       | 0.0%           | 0.0%           | 0.0%           | 0.0%           | 0.0% |
| tr I3LGG1 I3LGG1 |         | 0             | 2          | 0          | 0              | 0              | 0              | 0              | 0              | 7          | 0          | 0              | 0              | 0              | 0              | 0.0%              | 13.5%      | 0.0%       | 0.0%           | 0.0%           | 0.0%           | 0.0%           | 0.0% |
| tr F1RJR9 F1RJR9 |         | 3             | 2          | 0          | 0              | 0              | 0              | 0              | 5              | 2          | 0          | 0              | 0              | 0              | 0              | 25.9%             | 6.6%       | 0.0%       | 0.0%           | 0.0%           | 0.0%           | 0.0%           | 0.0% |
| tr I3LL38 I3LL38 |         | 4             | 0          | 0          | 0              | 0              | 0              | 0              | 7              | 0          | 0          | 0              | 0              | 0              | 0              | 44.7%             | 0.0%       | 0.0%       | 0.0%           | 0.0%           | 0.0%           | 0.0%           | 0.0% |
| tr K7GNI4 K7GNI4 |         | 0             | 1          | 0          | 0              | 0              | 0              | 0              | 0              | 7          | 0          | 0              | 0              | 0              | 0              | 0.0%              | 6.4%       | 0.0%       | 0.0%           | 0.0%           | 0.0%           | 0.0%           | 0.0% |
| tr K7GT54 K7GT54 |         | 0             | 1          | 0          | 0              | 0              | 0              | 0              | 0              | 7          | 0          | 0              | 0              | 0              | 0              | 0.0%              | 5.1%       | 0.0%       | 0.0%           | 0.0%           | 0.0%           | 0.0%           | 0.0% |
| tr I3LUT2 I3LUT2 |         | 0             | 1          | 0          | 0              | 0              | 0              | 0              | 0              | 7          | 0          | 0              | 0              | 0              | 0              | 0.0%              | 8.1%       | 0.0%       | 0.0%           | 0.0%           | 0.0%           | 0.0%           | 0.0% |
| tr I3LIP8 I3LIP8 |         | 1             | 1          | 0          | 0              | 0              | 0              | 0              | 1              | 6          | 0          | 0              | 0              | 0              | 0              | 7.4%              | 7.0%       | 0.0%       | 0.0%           | 0.0%           | 0.0%           | 0.0%           | 0.0% |
| tr F1SFF6 F1SFF6 |         | 2             | 1          | 0          | 0              | 0              | 0              | 0              | 5              | 2          | 0          | 0              | 0              | 0              | 0              | 9.0%              | 2.9%       | 0.0%       | 0.0%           | 0.0%           | 0.0%           | 0.0%           | 0.0% |
| tr F1SS29 F1SS29 |         | 0             | 1          | 0          | 0              | 0              | 0              | 0              | 0              | 7          | 0          | 0              | 0              | 0              | 0              | 0.0%              | 9.1%       | 0.0%       | 0.0%           | 0.0%           | 0.0%           | 0.0%           | 0.0% |
| tr F1RGD0 F1RGD0 |         | 0             | 2          | 0          | 0              | 0              | 0              | 0              | 0              | 7          | 0          | 0              | 0              | 0              | 0              | 0.0%              | 4.0%       | 0.0%       | 0.0%           | 0.0%           | 0.0%           | 0.0%           | 0.0% |
| tr I3LM77 I3LM77 |         | 1             | 1          | 0          | 0              | 0              | 0              | 0              | 2              | 5          | 0          | 0              | 0              | 0              | 0              | 2.8%              | 4.3%       | 0.0%       | 0.0%           | 0.0%           | 0.0%           | 0.0%           | 0.0% |
| tr F1RWL6 F1RWL6 |         | 1             | 1          | 0          | 0              | 0              | 0              | 0              | 2              | 5          | 0          | 0              | 0              | 0              | 0              | 2.6%              | 4.0%       | 0.0%       | 0.0%           | 0.0%           | 0.0%           | 0.0%           | 0.0% |
| tr F1SLH1 F1SLH1 |         | 1             | 0          | 0          | 0              | 0              | 0              | 0              | 7              | 0          | 0          | 0              | 0              | 0              | 0              | 21.9%             | 0.0%       | 0.0%       | 0.0%           | 0.0%           | 0.0%           | 0.0%           | 0.0% |
| tr F1S4Q6 F1S4Q6 |         | 4             | 1          | 0          | 0              | 0              | 0              | 0              | 5              | 2          | 0          | 0              | 0              | 0              | 0              | 8.2%              | 1.0%       | 0.0%       | 0.0%           | 0.0%           | 0.0%           | 0.0%           | 0.0% |
| tr F1S1V9 F1S1V9 |         | 4             | 0          | 0          | 0              | 0              | 0              | 0              | 7              | 0          | 0          | 0              | 0              | 0              | 0              | 10.4%             | 0.0%       | 0.0%       | 0.0%           | 0.0%           | 0.0%           | 0.0%           | 0.0% |
| tr F1S1K0 F1S1K0 |         | 3             | 1          | 0          | 0              | 0              | 0              | 0              | 6              | 1          | 0          | 0              | 0              | 0              | 0              | 4.4%              | 1.6%       | 0.0%       | 0.0%           | 0.0%           | 0.0%           | 0.0%           | 0.0% |
| tr F2Z5Q5 F2Z5Q5 |         | 0             | 2          | 0          | 0              | 0              | 0              | 0              | 0              | 7          | 0          | 0              | 0              | 0              | 0              | 0.0%              | 10.5%      | 0.0%       | 0.0%           | 0.0%           | 0.0%           | 0.0%           | 0.0% |
| tr I3LNP9 I3LNP9 |         | 2             | 2          | 0          | 0              | 0              | 0              | 0              | 2              | 5          | 0          | 0              | 0              | 0              | 0              | 12.3%             | 12.6%      | 0.0%       | 0.0%           | 0.0%           | 0.0%           | 0.0%           | 0.0% |
| tr F1SPT0 F1SPT0 |         | 2             | 1          | 0          | 0              | 0              | 0              | 0              | 2              | 5          | 0          | 0              | 0              | 0              | 0              | 3.3%              | 0.9%       | 0.0%       | 0.0%           | 0.0%           | 0.0%           | 0.0%           | 0.0% |
| tr F1SCH1 F1SCH1 |         | 2             | 1          | 0          | 0              | 0              | 0              | 0              | 5              | 2          | 0          | 0              | 0              | 0              | 0              | 27.4%             | 11.3%      | 0.0%       | 0.0%           | 0.0%           | 0.0%           | 0.0%           | 0.0% |
| tr F1S4D6 F1S4D6 |         | 2             | 0          | 0          | 0              | 0              | 0              | 0              | 7              | 0          | 0          | 0              | 0              | 0              | 0              | 2.9%              | 0.0%       | 0.0%       | 0.0%           | 0.0%           | 0.0%           | 0.0%           | 0.0% |
| tr F1SEL1 F1SEL1 |         | 3             | 1          | 0          | 0              | 0              | 0              | 0              | 3              | 4          | 0          | 0              | 0              | 0              | 0              | 11.9%             | 3.0%       | 0.0%       | 0.0%           | 0.0%           | 0.0%           | 0.0%           | 0.0% |
| tr F2Z5B8 F2Z5B8 |         | 1             | 2          | 0          | 0              | 0              | 0              | 0              | 4              | 3          | 0          | 0              | 0              | 0              | 0              | 22.6%             | 31.5%      | 0.0%       | 0.0%           | 0.0%           | 0.0%           | 0.0%           | 0.0% |
| tr I3LGB7 I3LGB7 |         | 4             | 0          | 0          | 0              | 0              | 0              | 0              | 7              | 0          | 0          | 0              | 0              | 0              | 0              | 44.9%             | 0.0%       | 0.0%       | 0.0%           | 0.0%           | 0.0%           | 0.0%           | 0.0% |
| tr I3LVF5 I3LVF5 |         | 2             | 2          | 0          | 0              | 0              | 0              | 0              | 5              | 2          | 0          | 0              | 0              | 0              | 0              | 18.0%             | 18.5%      | 0.0%       | 0.0%           | 0.0%           | 0.0%           | 0.0%           | 0.0% |
| tr F1SQ09 F1SQ09 |         | 2             | 2          | 0          | 0              | 0              | 0              | 0              | 3              | 4          | 0          | 0              | 0              | 0              | 0              | 4.8%              | 2.7%       | 0.0%       | 0.0%           | 0.0%           | 0.0%           | 0.0%           | 0.0% |
| tr K7GR29 K7GR29 |         | 4             | 2          | 0          | 0              | 0              | 0              | 0              | 5              | 2          | 0          | 0              | 0              | 0              | 0              | 7.0%              | 4.6%       | 0.0%       | 0.0%           | 0.0%           | 0.0%           | 0.0%           | 0.0% |
| tr F1RU27 F1RU27 |         | 1             | 2          | 0          | 0              | 0              | 0              | 0              | 1              | 6          | 0          | 0              | 0              | 0              | 0              | 4.4%              | 6.8%       | 0.0%       | 0.0%           | 0.0%           | 0.0%           | 0.0%           | 0.0% |
| tr F1RTI8 F1RTI8 |         | 4             | 2          | 0          | 0              | 0              | 0              | 0              | 5              | 2          | 0          | 0              | 0              | 0              | 0              | 6.9%              | 4.6%       | 0.0%       | 0.0%           | 0.0%           | 0.0%           | 0.0%           | 0.0% |
| tr F1RU72 F1RU72 |         | 3             | 2          | 1          | 0              | 0              | 0              | 0              | 3              | 4          | 1          | 0              | 0              | 0              | 0              | 4.0%              | 1.6%       | 1.1%       | 0.0%           | 0.0%           | 0.0%           | 0.0%           | 0.0% |
| tr F1RU28 F1RU28 |         | 2             | 2          | 1          | 0              | 0              | 0              | 0              | 2              | 5          | 1          | 0              | 0              | 0              | 0              | 5.9%              | 5.9%       | 12.2%      | 0.0%           | 0.0%           | 0.0%           | 0.0%           | 0.0% |
| tr I3LKR1 I3LKR1 |         | 4             | 0          | 1          | 0              | 0              | 0              | 0              | 7              | 0          | 1          | 0              | 0              | 0              | 0              | 7.9%              | 0.0%       | 3.8%       | 0.0%           | 0.0%           | 0.0%           | 0.0%           | 0.0% |
| tr I3LQV2 I3LQV2 |         | 4             | 1          | 1          | 0              | 0              | 0              | 0              | 5              | 2          | 2          | 0              | 0              | 0              | 0              | 24.6%             | 3.6%       | 4.8%       | 0.0%           | 0.0%           | 0.0%           | 0.0%           | 0.0% |
| tr F1RHZ8 F1RHZ8 |         | 4             | 0          | 1          | 0              | 0              | 0              | 0              | 7              | 0          | 2          | 0              | 0              | 0              | 0              | 26.9%             | 0.0%       | 5.2%       | 0.0%           | 0.0%           | 0.0%           | 0.0%           | 0.0% |
| tr F1RM40 F1RM40 |         | 1             | 2          | 1          | 0              | 0              | 0              | 0              | 2              | 5          | 2          | 0              | 0              | 0              | 0              | 2.2%              | 2.4%       | 2.0%       | 0.0%           | 0.0%           | 0.0%           | 0.0%           | 0.0% |
| tr F1SS59 F1SS59 |         | 2             | 1          | 2          | 0              | 0              | 0              | 0              | 3              | 4          | 3          | 0              | 0              | 0              | 0              | 21.4%             | 11.9%      | 29.8%      | 0.0%           | 0.0%           | 0.0%           | 0.0%           | 0.0% |
| P79273           |         | 3             | 0          | 2          | 0              | 0              | 0              | 0              | 7              | 0          | 3          | 0              | 0              | 0              | 0              | 12.8%             | 0.0%       | 11.6%      | 0.0%           | 0.0%           | 0.0%           | 0.0%           | 0.0% |
| tr F1S8B0 F1S8B0 |         | 4             | 0          | 2          | 0              | 0              | 0              | 0              | 7              | 0          | 4          | 0              | 0              | 0              | 0              | 16.0%             | 0.0%       | 10.6%      | 0.0%           | 0.0%           | 0.0%           | 0.0%           | 0.0% |
| tr F1S2N0 F1S2N0 |         | 4             | 0          | 2          | 0              | 0              | 0              | 0              | 7              | 0          | 4          | 0              | 0              | 0              | 0              | 31.0%             | 0.0%       | 16.7%      | 0.0%           | 0.0%           | 0.0%           | 0.0%           | 0.0% |
| tr F1RWJ0 F1RWJ0 |         | 4             | 0          | 1          | 0              | 0              | 0              | 0              | 7              | 0          | 4          | 0              | 0              | 0              | 0              | 21.8%             | 0.0%       | 9.2%       | 0.0%           | 0.0%           | 0.0%           | 0.0%           | 0.0% |
| tr K7GR50 K7GR50 |         | 4             | 0          | 2          | 0              | 0              | 0              | 0              | 7              | 0          | 4          | 0              | 0              | 0              | 0              | 36.4%             | 0.0%       | 19.6%      | 0.0%           | 0.0%           | 0.0%           | 0.0%           | 0.0% |
| tr I3LRG0 I3LRG0 |         | 2             | 1          | 1          | 0              | 0              | 0              | 0              | 6              | 1          | 4          | 0              | 0              | 0              | 0              | 15.0%             | 9.0%       | 5.2%       | 0.0%           | 0.0%           | 0.0%           | 0.0%           | 0.0% |
| tr F1SIT4 F1SIT4 |         | 4             | 1          | 1          | 0              | 0              | 0              | 0              | 6              | 1          | 4          | 0              | 0              | 0              | 0              | 3.7%              | 0.9%       | 1.3%       | 0.0%           | 0.0%           | 0.0%           | 0.0%           | 0.0% |
| tr K7QGV5 K7QGV5 |         | 4             | 0          | 2          | 0              | 0              | 0              | 0              | 7              | 0          | 4          | 0              | 0              | 0              | 0              | 30.9%             | 0.0%       | 16.6%      | 0.0%           | 0.0%           | 0.0%           | 0.0%           | 0.0% |
| tr F1S8S6 F1S8S6 |         | 5             | 0          | 1          | 0              | 0              | 0              | 0              | 7              | 0          | 5          | 0              | 0              | 0              | 0              | 12.0%             | 0.0%       | 3.3%       | 0.0%           | 0.0%           | 0.0%           | 0.0%           | 0.0% |
| tr F1S001 F1S001 |         | 3             | 0          | 1          | 0              | 0              | 0              | 0              | 7              | 0          | 6          | 0              | 0              | 0              | 0              | 10.7%             | 0.0%       | 11.4%      | 0.0%           | 0.0%           | 0.0%           | 0.0%           | 0.0% |
| tr I3LU08 I3LU08 |         | 5             | 0          | 2          | 0              | 0              | 0              | 0              | 7              | 0          | 6          | 0              | 0              | 0              | 0              | 19.9%             | 0.0%       | 13.8%      | 0.0%           | 0.0%           | 0.0%           | 0.0%           | 0.0% |
| tr I3LHK5 I3LHK5 |         | 5             | 1          | 2          | 0              | 0              | 0              | 0              | 5              | 2          | 6          | 0              | 0              | 0              | 0              | 20.6%             | 5.3%       | 10.6%      | 0.0%           | 0.0%           | 0.0%           | 0.0%           | 0.0% |
| tr I3L9H6 I3L9H6 |         | 3             | 0          | 2          | 0              | 0              | 0              | 0              | 7              | 0          | 8          | 0              | 0              | 0              | 0              | 27.0%             | 0.0%       | 13.8%      | 0.0%           | 0.0%           | 0.0%           | 0.0%           | 0.0% |
| tr K7GKW7 K7GKW7 |         | 3             | 0          | 4          | 0              | 0              | 0              | 0              | 7              | 0          | 8          | 0              | 0              | 0              | 0              | 20.9%             | 0.0%       | 13.2%      | 0.0%           | 0.0%           | 0.0%           | 0.0%           | 0.0% |
| tr F1RFD4 F1RFD4 |         | 2             | 1          | 1          | 0              | 0              | 0              | 0              | 2              | 5          | 8          | 0              | 0              | 0              | 0              | 27.6%             | 19.0%      | 27.6%      | 0.0%           | 0.0%           | 0.0%           | 0.0%           | 0.0% |
| tr Q32YV9 Q32YV9 |         | 5             | 1          | 4          | 0              | 0              | 0              | 0              | 6              | 1          | 9          | 0              | 0              | 0              | 0              | 21.8%             | 2.1%       | 11.4%      | 0.0%           | 0.0%           | 0.0%           | 0.0%           | 0.0% |
| tr F1RXI6 F1RXI6 |         | 4             | 1          | 2          | 0              | 0              | 0              | 0              | 6              | 1          | 10         | 0              | 0              | 0              | 0              | 21.7%             | 4.0%       | 11.9%      | 0.0%           | 0.0%           | 0.0%           | 0.0%           | 0.0% |
| tr F1SQ16 F1SQ16 |         | 6             | 1          | 5          | 0              | 0              | 0              | 0              | 6              | 1          | 11         | 0              | 0              | 0              | 0              | 2.4%              | 0.3%       | 2.2%       | 0.0%           | 0.0%           | 0.0%           | 0.0%           | 0.0% |
| Q5D144           |         | 1             | 1          | 2          | 0              | 0              | 0              | 0              | 1              | 6          | 12         | 0              | 0              | 0              | 0              | 3.7%              | 3.3%       | 11.0%      | 0.0%           | 0.0%           | 0.0%           | 0.0%           | 0.0% |
| tr Q2EN80 Q2EN80 |         | 2             | 1          | 2          | 0              | 0              | 0              | 0              | 6              | 1          | 13         | 0              | 0              | 0              | 0              | 22.7%             | 8.6%       | 21.9%      | 0.0%           | 0.0%           | 0.0%           | 0.0%           | 0.0% |
| tr F1S4N2 F1S4N2 |         | 3             | 2          | 3          | 0              | 0              | 0              | 0              | 5              | 2          | 14         | 0              | 0              | 0              | 0              | 15.1%             | 9.8%       | 12.5%      | 0.0%           | 0.0%           | 0.0%           | 0.0%           | 0.0% |
| tr F1S1A8 F1S1A8 |         | 3             | 1          | 1          | 0              | 0              | 0              | 0              | 5              | 2          | 14         | 0              | 0              | 0              | 0              | 5.0%              | 2.4%       | 2.6%       | 0.0%           | 0.0%           | 0.0%           | 0.0%           | 0.0% |
| tr I3LHY0 I3LHY0 |         | 5             | 0          | 6          | 0              | 0              | 0              | 0              | 7              | 0          | 17         | 0              | 0              | 0              | 0              | 17.3%             | 0.0%       | 16.6%      | 0.0%           | 0.0%           | 0.0%           | 0.0%           | 0.0% |
| tr F1RNS8 F1RNS8 |         | 5             | 1          | 3          | 0              | 0              | 0              | 0              | 5              | 2          | 17         | 0              | 0              | 0              | 0              | 28.0%             | 6.0%       | 25.3%      | 0.0%           | 0.0%           | 0.0%           | 0.0%           | 0.0% |
| tr F1RHA0 F1RHA0 |         | 4             | 1          | 2          | 0              | 0              | 0              | 0              | 6              | 1          | 17         | 0              | 0              | 0              | 0              | 13.1%             | 2.4%       | 4.1%       | 0.0%           | 0.0%           | 0.0%           | 0.0%           | 0.0% |
| tr I3LNR4 I3LNR4 |         | 4             | 1          | 2          | 0              | 0              | 0              | 0              | 6              | 1          | 17         | 0              | 0              | 0              | 0              | 12.1%             | 2.2%       | 3.8%       | 0.0%           | 0.0%           | 0.0%           | 0.0%</         |      |

| Accession        | Sample# | Peptide Count |            |            |                |                |                |                | Spectral Count |            |            |                |                |                |                |                | Sequence Coverage |            |            |                |                |                |                |                |       |
|------------------|---------|---------------|------------|------------|----------------|----------------|----------------|----------------|----------------|------------|------------|----------------|----------------|----------------|----------------|----------------|-------------------|------------|------------|----------------|----------------|----------------|----------------|----------------|-------|
|                  |         | Whole Cell    | Whole Cell | Whole Cell | Cilia Fraction | Cilia Fraction | Cilia Fraction | Cilia Fraction | Whole Cell     | Whole Cell | Whole Cell | Cilia Fraction | Whole Cell        | Whole Cell | Whole Cell | Cilia Fraction |       |
|                  |         | 1             | 2          | 6          | 4              | 3              | 5              | 7              | 1              | 2          | 6          | 4              | 3              | 5              | 7              | 8              | 1                 | 2          | 6          | 4              | 3              | 5              | 7              | 8              |       |
| tr I3LSJ4 I3LSJ4 |         | 4             | 2          | 1          | 0              | 0              | 0              | 1              | 2              | 4          | 2          | 2              | 0              | 0              | 0              | 3              | 4                 | 12.7%      | 6.5%       | 2.9%           | 0.0%           | 0.0%           | 0.0%           | 8.6%           | 14.4% |
| Q2HYU2           |         | 0             | 3          | 0          | 0              | 0              | 0              | 0              | 1              | 0          | 6          | 0              | 0              | 0              | 0              | 0              | 5                 | 0.0%       | 3.7%       | 0.0%           | 0.0%           | 0.0%           | 0.0%           | 0.0%           | 1.2%  |
| tr Q19QT0 Q19QT0 |         | 3             | 0          | 1          | 0              | 0              | 0              | 0              | 2              | 6          | 0          | 1              | 0              | 0              | 0              | 0              | 4                 | 10.8%      | 0.0%       | 9.5%           | 0.0%           | 0.0%           | 0.0%           | 0.0%           | 7.2%  |
| tr F1SMW4 F1SMW4 |         | 2             | 1          | 3          | 0              | 0              | 0              | 2              | 3              | 2          | 4          | 12             | 0              | 0              | 0              | 5              | 4                 | 7.6%       | 3.3%       | 10.6%          | 0.0%           | 0.0%           | 0.0%           | 7.0%           | 7.9%  |
| tr I3LAV6 I3LAV6 |         | 4             | 0          | 0          | 0              | 0              | 0              | 0              | 2              | 6          | 0          | 0              | 0              | 0              | 0              | 0              | 3                 | 36.4%      | 0.0%       | 0.0%           | 0.0%           | 0.0%           | 0.0%           | 0.0%           | 31.4% |
| tr I3LPD5 I3LPD5 |         | 1             | 2          | 0          | 0              | 0              | 0              | 1              | 1              | 1          | 5          | 0              | 0              | 0              | 0              | 1              | 2                 | 4.9%       | 11.1%      | 0.0%           | 0.0%           | 0.0%           | 0.0%           | 4.9%           | 10.8% |
| tr F1RWP0 F1RWP0 |         | 3             | 1          | 0          | 0              | 0              | 0              | 0              | 1              | 5          | 1          | 0              | 0              | 0              | 0              | 0              | 3                 | 7.8%       | 4.4%       | 0.0%           | 0.0%           | 0.0%           | 0.0%           | 0.0%           | 3.6%  |
| tr F1S8M9 F1S8M9 |         | 5             | 0          | 6          | 0              | 0              | 0              | 1              | 3              | 6          | 0          | 21             | 0              | 0              | 0              | 1              | 12                | 9.3%       | 0.0%       | 24.8%          | 0.0%           | 0.0%           | 0.0%           | 2.3%           | 10.1% |
| tr F2Z4Y0 F2Z4Y0 |         | 3             | 1          | 4          | 0              | 0              | 0              | 0              | 2              | 5          | 1          | 25             | 0              | 0              | 0              | 0              | 14                | 24.6%      | 7.9%       | 31.7%          | 0.0%           | 0.0%           | 0.0%           | 0.0%           | 16.7% |
| tr F1RWS8 F1RWS8 |         | 6             | 0          | 1          | 0              | 0              | 0              | 1              | 1              | 6          | 0          | 1              | 0              | 0              | 0              | 2              | 1                 | 36.5%      | 0.0%       | 4.3%           | 0.0%           | 0.0%           | 0.0%           | 13.7%          | 13.7% |
| tr F1S3T0 F1S3T0 |         | 3             | 1          | 1          | 0              | 0              | 0              | 0              | 1              | 5          | 1          | 3              | 0              | 0              | 0              | 0              | 3                 | 18.1%      | 4.0%       | 10.5%          | 0.0%           | 0.0%           | 0.0%           | 0.0%           | 10.9% |
| tr F1RPL9 F1RPL9 |         | 1             | 1          | 0          | 0              | 0              | 0              | 0              | 1              | 2          | 4          | 0              | 0              | 0              | 0              | 1              | 1                 | 5.5%       | 5.5%       | 0.0%           | 0.0%           | 0.0%           | 0.0%           | 5.5%           | 5.5%  |
| Q2QL00           |         | 3             | 2          | 0          | 0              | 0              | 0              | 1              | 0              | 4          | 2          | 0              | 0              | 0              | 0              | 2              | 0                 | 4.0%       | 1.5%       | 0.0%           | 0.0%           | 0.0%           | 0.0%           | 1.5%           | 0.0%  |
| tr F1S306 F1S306 |         | 6             | 0          | 4          | 0              | 0              | 0              | 0              | 2              | 6          | 0          | 47             | 0              | 0              | 0              | 0              | 15                | 22.7%      | 0.0%       | 13.0%          | 0.0%           | 0.0%           | 0.0%           | 0.0%           | 8.8%  |
| tr F1RKZ6 F1RKZ6 |         | 2             | 3          | 5          | 0              | 0              | 0              | 1              | 2              | 2          | 4          | 14             | 0              | 0              | 0              | 2              | 3                 | 3.8%       | 4.0%       | 6.4%           | 0.0%           | 0.0%           | 0.0%           | 2.9%           | 4.7%  |
| tr F2Z5J5 F2Z5J5 |         | 3             | 1          | 2          | 0              | 0              | 0              | 0              | 1              | 5          | 1          | 10             | 0              | 0              | 0              | 0              | 4                 | 38.5%      | 23.1%      | 30.8%          | 0.0%           | 0.0%           | 0.0%           | 0.0%           | 7.7%  |
| tr F1SB44 F1SB44 |         | 2             | 1          | 2          | 0              | 0              | 0              | 2              | 0              | 3          | 3          | 17             | 0              | 0              | 0              | 5              | 0                 | 30.4%      | 11.6%      | 30.4%          | 0.0%           | 0.0%           | 0.0%           | 37.5%          | 0.0%  |
| tr K7GSD8 K7GSD8 |         | 5             | 0          | 5          | 0              | 0              | 0              | 2              | 1              | 6          | 0          | 14             | 0              | 0              | 0              | 3              | 1                 | 29.0%      | 0.0%       | 19.4%          | 0.0%           | 0.0%           | 0.0%           | 12.5%          | 7.2%  |
| tr I3LRG2 I3LRG2 |         | 5             | 0          | 5          | 0              | 0              | 0              | 2              | 1              | 6          | 0          | 14             | 0              | 0              | 0              | 3              | 1                 | 24.0%      | 0.0%       | 16.0%          | 0.0%           | 0.0%           | 0.0%           | 10.4%          | 5.9%  |
| tr F1SFO0 F1SFO0 |         | 5             | 1          | 2          | 0              | 0              | 0              | 0              | 1              | 5          | 1          | 4              | 0              | 0              | 0              | 0              | 2                 | 18.2%      | 3.2%       | 5.1%           | 0.0%           | 0.0%           | 0.0%           | 0.0%           | 5.1%  |
| tr I3LCY8 I3LCY8 |         | 1             | 0          | 0          | 0              | 0              | 0              | 0              | 1              | 6          | 0          | 0              | 0              | 0              | 0              | 0              | 1                 | 3.2%       | 0.0%       | 0.0%           | 0.0%           | 0.0%           | 0.0%           | 0.0%           | 3.2%  |
| tr K7N7E5 K7N7E5 |         | 2             | 2          | 0          | 0              | 0              | 0              | 0              | 1              | 4          | 2          | 0              | 0              | 0              | 0              | 0              | 1                 | 10.7%      | 5.7%       | 0.0%           | 0.0%           | 0.0%           | 0.0%           | 0.0%           | 5.0%  |
| tr F1RVA1 F1RVA1 |         | 1             | 1          | 0          | 0              | 0              | 0              | 0              | 1              | 4          | 2          | 0              | 0              | 0              | 0              | 0              | 1                 | 14.4%      | 5.7%       | 0.0%           | 0.0%           | 0.0%           | 0.0%           | 0.0%           | 14.4% |
| tr I3LAB3 I3LAB3 |         | 2             | 1          | 0          | 0              | 0              | 0              | 0              | 1              | 5          | 1          | 0              | 0              | 0              | 0              | 0              | 1                 | 11.2%      | 6.9%       | 0.0%           | 0.0%           | 0.0%           | 0.0%           | 0.0%           | 6.9%  |
| tr I3L829 I3L829 |         | 5             | 0          | 0          | 0              | 0              | 0              | 0              | 1              | 6          | 0          | 0              | 0              | 0              | 0              | 0              | 1                 | 13.5%      | 0.0%       | 0.0%           | 0.0%           | 0.0%           | 0.0%           | 0.0%           | 6.5%  |
| tr F1SKQ3 F1SKQ3 |         | 5             | 0          | 0          | 0              | 0              | 0              | 0              | 1              | 6          | 0          | 0              | 0              | 0              | 0              | 0              | 1                 | 30.5%      | 0.0%       | 0.0%           | 0.0%           | 0.0%           | 0.0%           | 0.0%           | 6.5%  |
| tr F1SSV2 F1SSV2 |         | 5             | 0          | 5          | 0              | 0              | 0              | 0              | 2              | 6          | 0          | 15             | 0              | 0              | 0              | 0              | 3                 | 31.0%      | 0.0%       | 24.4%          | 0.0%           | 0.0%           | 0.0%           | 0.0%           | 8.6%  |
| tr I3LTM8 I3LTM8 |         | 5             | 0          | 5          | 0              | 0              | 0              | 0              | 2              | 6          | 0          | 15             | 0              | 0              | 0              | 0              | 3                 | 31.0%      | 0.0%       | 24.4%          | 0.0%           | 0.0%           | 0.0%           | 0.0%           | 8.6%  |
| tr I3LN65 I3LN65 |         | 2             | 1          | 1          | 0              | 0              | 0              | 0              | 1              | 5          | 1          | 2              | 0              | 0              | 0              | 0              | 1                 | 19.7%      | 8.0%       | 5.9%           | 0.0%           | 0.0%           | 0.0%           | 0.0%           | 13.8% |
| tr F1RF91 F1RF91 |         | 2             | 1          | 1          | 0              | 0              | 0              | 0              | 1              | 3          | 3          | 3              | 0              | 0              | 0              | 0              | 1                 | 8.6%       | 3.4%       | 5.2%           | 0.0%           | 0.0%           | 0.0%           | 0.0%           | 14.5% |
| tr F1SUP2 F1SUP2 |         | 2             | 2          | 5          | 0              | 0              | 0              | 0              | 2              | 3          | 3          | 16             | 0              | 0              | 0              | 0              | 2                 | 11.9%      | 11.9%      | 24.8%          | 0.0%           | 0.0%           | 0.0%           | 0.0%           | 11.9% |
| tr I3LRR4 I3LRR4 |         | 6             | 0          | 5          | 0              | 0              | 0              | 1              | 1              | 6          | 0          | 16             | 0              | 0              | 0              | 1              | 1                 | 19.2%      | 0.0%       | 16.1%          | 0.0%           | 0.0%           | 0.0%           | 3.6%           | 3.4%  |
| tr I3LR99 I3LR99 |         | 4             | 1          | 4          | 0              | 0              | 0              | 0              | 1              | 5          | 1          | 5              | 0              | 0              | 0              | 0              | 1                 | 6.2%       | 1.4%       | 4.8%           | 0.0%           | 0.0%           | 0.0%           | 0.0%           | 1.2%  |
| tr F1SJR4 F1SJR4 |         | 3             | 2          | 1          | 0              | 0              | 0              | 0              | 1              | 3          | 3          | 5              | 0              | 0              | 0              | 0              | 1                 | 11.1%      | 4.8%       | 2.9%           | 0.0%           | 0.0%           | 0.0%           | 0.0%           | 4.8%  |
| tr F1S419 F1S419 |         | 2             | 2          | 2          | 0              | 0              | 0              | 0              | 1              | 2          | 4          | 7              | 0              | 0              | 0              | 0              | 1                 | 13.2%      | 8.5%       | 10.3%          | 0.0%           | 0.0%           | 0.0%           | 0.0%           | 8.2%  |
| tr F1SAN6 F1SAN6 |         | 2             | 2          | 4          | 0              | 0              | 0              | 0              | 2              | 4          | 2          | 66             | 0              | 0              | 0              | 0              | 5                 | 8.5%       | 5.4%       | 8.5%           | 0.0%           | 0.0%           | 0.0%           | 0.0%           | 8.3%  |
| tr F1SQK1 F1SQK1 |         | 2             | 1          | 4          | 0              | 0              | 0              | 0              | 1              | 4          | 2          | 13             | 0              | 0              | 0              | 0              | 1                 | 4.8%       | 1.1%       | 12.1%          | 0.0%           | 0.0%           | 0.0%           | 0.0%           | 3.3%  |
| tr I3L9K5 I3L9K5 |         | 1             | 1          | 7          | 0              | 0              | 0              | 0              | 1              | 1          | 5          | 22             | 0              | 0              | 0              | 0              | 1                 | 8.2%       | 4.5%       | 11.5%          | 0.0%           | 0.0%           | 0.0%           | 0.0%           | 4.5%  |
| Q19QT7           |         | 3             | 0          | 0          | 0              | 0              | 0              | 0              | 0              | 6          | 0          | 0              | 0              | 0              | 0              | 0              | 0                 | 14.3%      | 0.0%       | 0.0%           | 0.0%           | 0.0%           | 0.0%           | 0.0%           | 0.0%  |
| tr K7GR55 K7GR55 |         | 2             | 1          | 0          | 0              | 0              | 0              | 0              | 0              | 2          | 4          | 0              | 0              | 0              | 0              | 0              | 0                 | 10.8%      | 3.7%       | 0.0%           | 0.0%           | 0.0%           | 0.0%           | 0.0%           | 0.0%  |
| tr I3L6Z8 I3L6Z8 |         | 1             | 2          | 0          | 0              | 0              | 0              | 0              | 0              | 1          | 5          | 0              | 0              | 0              | 0              | 0              | 0                 | 10.4%      | 22.9%      | 0.0%           | 0.0%           | 0.0%           | 0.0%           | 0.0%           | 0.0%  |
| tr F1RJD0 F1RJD0 |         | 1             | 1          | 0          | 0              | 0              | 0              | 0              | 0              | 2          | 4          | 0              | 0              | 0              | 0              | 0              | 0                 | 14.8%      | 6.7%       | 0.0%           | 0.0%           | 0.0%           | 0.0%           | 0.0%           | 0.0%  |
| tr F1RWV6 F1RWV6 |         | 1             | 1          | 0          | 0              | 0              | 0              | 0              | 0              | 1          | 5          | 0              | 0              | 0              | 0              | 0              | 0                 | 2.4%       | 1.0%       | 0.0%           | 0.0%           | 0.0%           | 0.0%           | 0.0%           | 0.0%  |
| tr K7GRA6 K7GRA6 |         | 3             | 0          | 0          | 0              | 0              | 0              | 0              | 0              | 6          | 0          | 0              | 0              | 0              | 0              | 0              | 0                 | 21.2%      | 0.0%       | 0.0%           | 0.0%           | 0.0%           | 0.0%           | 0.0%           | 0.0%  |
| tr F1RQU0 F1RQU0 |         | 0             | 1          | 0          | 0              | 0              | 0              | 0              | 0              | 0          | 6          | 0              | 0              | 0              | 0              | 0              | 0                 | 0.0%       | 2.9%       | 0.0%           | 0.0%           | 0.0%           | 0.0%           | 0.0%           | 0.0%  |
| tr F1RGP5 F1RGP5 |         | 2             | 1          | 0          | 0              | 0              | 0              | 0              | 0              | 4          | 2          | 0              | 0              | 0              | 0              | 0              | 0                 | 8.0%       | 1.7%       | 0.0%           | 0.0%           | 0.0%           | 0.0%           | 0.0%           | 0.0%  |
| tr F1SQH4 F1SQH4 |         | 2             | 2          | 0          | 0              | 0              | 0              | 0              | 0              | 3          | 3          | 0              | 0              | 0              | 0              | 0              | 0                 | 6.9%       | 5.1%       | 0.0%           | 0.0%           | 0.0%           | 0.0%           | 0.0%           | 0.0%  |
| tr K7GLG2 K7GLG2 |         | 1             | 1          | 0          | 0              | 0              | 0              | 0              | 0              | 1          | 5          | 0              | 0              | 0              | 0              | 0              | 0                 | 2.9%       | 1.2%       | 0.0%           | 0.0%           | 0.0%           | 0.0%           | 0.0%           | 0.0%  |
| tr F1SMG1 F1SMG1 |         | 3             | 0          | 0          | 0              | 0              | 0              | 0              | 0              | 6          | 0          | 0              | 0              | 0              | 0              | 0              | 0                 | 14.7%      | 0.0%       | 0.0%           | 0.0%           | 0.0%           | 0.0%           | 0.0%           | 0.0%  |
| tr F1RIJ5 F1RIJ5 |         | 0             | 2          | 0          | 0              | 0              | 0              | 0              | 0              | 0          | 6          | 0              | 0              | 0              | 0              | 0              | 0                 | 0.0%       | 8.2%       | 0.0%           | 0.0%           | 0.0%           | 0.0%           | 0.0%           | 0.0%  |
| tr F1SQY2 F1SQY2 |         | 3             | 1          | 0          | 0              | 0              | 0              | 0              | 0              | 5          | 1          | 0              | 0              | 0              | 0              | 0              | 0                 | 18.6%      | 3.1%       | 0.0%           | 0.0%           | 0.0%           | 0.0%           | 0.0%           | 0.0%  |
| tr I3L6S9 I3L6S9 |         | 1             | 0          | 0          | 0              | 0              | 0              | 0              | 0              | 6          | 0          | 0              | 0              | 0              | 0              | 0              | 0                 | 3.3%       | 0.0%       | 0.0%           | 0.0%           | 0.0%           | 0.0%           | 0.0%           | 0.0%  |
| tr F1RH59 F1RH59 |         | 4             | 1          | 0          | 0              | 0              | 0              | 0              | 0              | 5          | 1          | 0              | 0              | 0              | 0              | 0              | 0                 | 14.8%      | 3.6%       | 0.0%           | 0.0%           | 0.0%           | 0.0%           | 0.0%           | 0.0%  |
| tr K7GLV4 K7GLV4 |         | 0             | 1          | 0          | 0              | 0              | 0              | 0              | 0              | 0          | 6          | 0              | 0              | 0              | 0              | 0              | 0                 | 0.0%       | 3.3%       | 0.0%           | 0.0%           | 0.0%           | 0.0%           | 0.0%           | 0.0%  |
| tr F1RRP8 F1RRP8 |         | 2             | 0          | 0          | 0              | 0              | 0              | 0              | 0              | 6          | 0          | 0              | 0              | 0              | 0              | 0              | 0                 | 18.3%      | 0.0%       | 0.0%           | 0.0%           | 0.0%           | 0.0%           | 0.0%           | 0.0%  |
| tr F1SLI2 F1SLI2 |         | 0             | 1          | 0          | 0              | 0              | 0              | 0              | 0              | 0          | 6          | 0              | 0              | 0              | 0              | 0              | 0                 | 0.0%       | 6.2%       | 0.0%           | 0.0%           | 0.0%           | 0.0%           | 0.0%           | 0.0%  |
| tr F1SNF8 F1SNF8 |         | 4             | 1          | 0          | 0              | 0              | 0              | 0              | 0              | 5          | 1          | 0              | 0              | 0              | 0              | 0              | 0                 | 3.9%       | 0.7%       | 0.0%           | 0.0%           | 0.0%           | 0.0%           | 0.0%           | 0.0%  |
| tr I3L7J7 I3L7J7 |         | 3             | 1          | 0          | 0              | 0              | 0              | 0              | 0              | 4          | 2          | 0              | 0              | 0              | 0              | 0              | 0                 | 10.1%      | 3.8%       | 0.0%           | 0.0%           | 0.0%           | 0.0%           | 0.0%           | 0.0%  |
| tr I3LHS7 I3LHS7 |         | 3             | 1          | 0          | 0              | 0              | 0              | 0              | 0              | 5          | 1          | 0              | 0              | 0              | 0              | 0              | 0                 | 20.4%      | 9.4%       | 0.0%           | 0.0%           | 0.0%           | 0.0%           | 0.0%           | 0.0%  |
| tr K7GPY8 K7GPY8 |         | 2             | 1          | 0          | 0              | 0              | 0              | 0              | 0              | 5          | 1          | 0              | 0              | 0              | 0              | 0              | 0                 | 21.1%      | 8.7%       | 0.0%           | 0.0%           | 0.0%           | 0.0%           | 0.0%           | 0.0%  |
| tr I3LQE0 I3LQE0 |         | 3             | 0          | 0          | 0              | 0              | 0              | 0              | 0              | 6          | 0          | 0              | 0              | 0              | 0              | 0              | 0                 | 12.0%      | 0.0%       | 0.0%           | 0.0%           | 0.0%           | 0.0%           | 0.0%           | 0.0%  |
| tr F1RN46 F1RN46 |         | 5             | 0          | 0          | 0              | 0              | 0              | 0              | 0              | 6          | 0          | 0              | 0              | 0              | 0              | 0              | 0                 | 10.2%      | 0.0%       | 0.0%           | 0.0%           | 0.0%           | 0.0%           | 0.0%           | 0.0%  |
| tr I3LS10 I3LS10 |         | 6             | 0          | 0          | 0              | 0              | 0              | 0              | 0              | 6          | 0          |                |                |                |                |                |                   |            |            |                |                |                |                |                |       |

| Accession        | Sample# | Peptide Count |            |            |                |                |                |                | Spectral Count |            |            |            |                |                |                |                | Sequence Coverage |            |            |            |                |                |                |                |                |
|------------------|---------|---------------|------------|------------|----------------|----------------|----------------|----------------|----------------|------------|------------|------------|----------------|----------------|----------------|----------------|-------------------|------------|------------|------------|----------------|----------------|----------------|----------------|----------------|
|                  |         | Whole Cell    | Whole Cell | Whole Cell | Cilia Fraction | Whole Cell | Whole Cell | Whole Cell | Cilia Fraction    | Whole Cell | Whole Cell | Whole Cell | Cilia Fraction |
|                  |         | 1             | 2          | 6          | 4              | 3              | 5              | 7              | 8              | 1          | 2          | 6          | 4              | 3              | 5              | 7              | 8                 | 1          | 2          | 6          | 4              | 3              | 5              | 7              | 8              |
| tr I3LBT7 I3LBT7 |         | 0             | 1          | 0          | 0              | 0              | 0              | 0              | 0              | 0          | 6          | 0          | 0              | 0              | 0              | 0              | 0                 | 0.0%       | 1.2%       | 0.0%       | 0.0%           | 0.0%           | 0.0%           | 0.0%           | 0.0%           |
| tr F1RWY7 F1RWY7 |         | 3             | 1          | 0          | 0              | 0              | 0              | 0              | 0              | 5          | 1          | 0          | 0              | 0              | 0              | 0              | 0                 | 15.1%      | 3.4%       | 0.0%       | 0.0%           | 0.0%           | 0.0%           | 0.0%           | 0.0%           |
| tr K7GPJ6 K7GPJ6 |         | 3             | 0          | 0          | 0              | 0              | 0              | 0              | 0              | 6          | 0          | 0          | 0              | 0              | 0              | 0              | 0                 | 7.2%       | 0.0%       | 0.0%       | 0.0%           | 0.0%           | 0.0%           | 0.0%           | 0.0%           |
| tr I3LS90 I3LS90 |         | 4             | 0          | 0          | 0              | 0              | 0              | 0              | 0              | 6          | 0          | 0          | 0              | 0              | 0              | 0              | 0                 | 8.0%       | 0.0%       | 0.0%       | 0.0%           | 0.0%           | 0.0%           | 0.0%           | 0.0%           |
| tr F1RL1 F1RL1   |         | 3             | 0          | 0          | 0              | 0              | 0              | 0              | 0              | 6          | 0          | 0          | 0              | 0              | 0              | 0              | 0                 | 8.3%       | 0.0%       | 0.0%       | 0.0%           | 0.0%           | 0.0%           | 0.0%           | 0.0%           |
| tr I3LLK1 I3LLK1 |         | 6             | 0          | 0          | 0              | 0              | 0              | 0              | 0              | 6          | 0          | 0          | 0              | 0              | 0              | 0              | 0                 | 10.2%      | 0.0%       | 0.0%       | 0.0%           | 0.0%           | 0.0%           | 0.0%           | 0.0%           |
| tr C9K506 C9K506 |         | 1             | 1          | 0          | 0              | 0              | 0              | 0              | 0              | 2          | 4          | 0          | 0              | 0              | 0              | 0              | 0                 | 8.0%       | 3.7%       | 0.0%       | 0.0%           | 0.0%           | 0.0%           | 0.0%           | 0.0%           |
| tr F1RMO4 F1RMO4 |         | 5             | 0          | 0          | 0              | 0              | 0              | 0              | 0              | 6          | 0          | 0          | 0              | 0              | 0              | 0              | 0                 | 23.7%      | 0.0%       | 0.0%       | 0.0%           | 0.0%           | 0.0%           | 0.0%           | 0.0%           |
| tr I3LNI1 I3LNI1 |         | 1             | 1          | 0          | 0              | 0              | 0              | 0              | 0              | 3          | 3          | 0          | 0              | 0              | 0              | 0              | 0                 | 3.2%       | 1.4%       | 0.0%       | 0.0%           | 0.0%           | 0.0%           | 0.0%           | 0.0%           |
| Q2MJV9           |         | 4             | 0          | 0          | 0              | 0              | 0              | 0              | 0              | 6          | 0          | 0          | 0              | 0              | 0              | 0              | 0                 | 9.8%       | 0.0%       | 0.0%       | 0.0%           | 0.0%           | 0.0%           | 0.0%           | 0.0%           |
| tr I3L8B1 I3L8B1 |         | 3             | 1          | 0          | 0              | 0              | 0              | 0              | 0              | 4          | 2          | 0          | 0              | 0              | 0              | 0              | 0                 | 22.3%      | 4.5%       | 0.0%       | 0.0%           | 0.0%           | 0.0%           | 0.0%           | 0.0%           |
| tr F1RW16 F1RW16 |         | 2             | 1          | 0          | 0              | 0              | 0              | 0              | 0              | 2          | 4          | 0          | 0              | 0              | 0              | 0              | 0                 | 5.6%       | 2.8%       | 0.0%       | 0.0%           | 0.0%           | 0.0%           | 0.0%           | 0.0%           |
| tr F1RLM4 F1RLM4 |         | 6             | 0          | 0          | 0              | 0              | 0              | 0              | 0              | 6          | 0          | 0          | 0              | 0              | 0              | 0              | 0                 | 19.3%      | 0.0%       | 0.0%       | 0.0%           | 0.0%           | 0.0%           | 0.0%           | 0.0%           |
| tr I3LR07 I3LR07 |         | 5             | 0          | 0          | 0              | 0              | 0              | 0              | 0              | 6          | 0          | 0          | 0              | 0              | 0              | 0              | 0                 | 7.4%       | 0.0%       | 0.0%       | 0.0%           | 0.0%           | 0.0%           | 0.0%           | 0.0%           |
| tr F1SJL5 F1SJL5 |         | 5             | 1          | 0          | 0              | 0              | 0              | 0              | 0              | 5          | 1          | 0          | 0              | 0              | 0              | 0              | 0                 | 9.9%       | 1.9%       | 0.0%       | 0.0%           | 0.0%           | 0.0%           | 0.0%           | 0.0%           |
| tr I3LQG8 I3LQG8 |         | 2             | 1          | 1          | 0              | 0              | 0              | 0              | 0              | 3          | 3          | 1          | 0              | 0              | 0              | 0              | 0                 | 13.5%      | 5.5%       | 9.0%       | 0.0%           | 0.0%           | 0.0%           | 0.0%           | 0.0%           |
| tr F1RS43 F1RS43 |         | 3             | 1          | 1          | 0              | 0              | 0              | 0              | 0              | 5          | 1          | 1          | 0              | 0              | 0              | 0              | 0                 | 22.0%      | 8.1%       | 8.1%       | 0.0%           | 0.0%           | 0.0%           | 0.0%           | 0.0%           |
| tr F1SQG5 F1SQG5 |         | 3             | 2          | 1          | 0              | 0              | 0              | 0              | 0              | 4          | 2          | 2          | 0              | 0              | 0              | 0              | 0                 | 14.0%      | 5.7%       | 2.6%       | 0.0%           | 0.0%           | 0.0%           | 0.0%           | 0.0%           |
| tr F1S399 F1S399 |         | 4             | 1          | 1          | 0              | 0              | 0              | 0              | 0              | 5          | 1          | 2          | 0              | 0              | 0              | 0              | 0                 | 10.6%      | 3.4%       | 4.0%       | 0.0%           | 0.0%           | 0.0%           | 0.0%           | 0.0%           |
| tr F1RY63 F1RY63 |         | 3             | 2          | 1          | 0              | 0              | 0              | 0              | 0              | 3          | 3          | 2          | 0              | 0              | 0              | 0              | 0                 | 7.3%       | 2.8%       | 1.9%       | 0.0%           | 0.0%           | 0.0%           | 0.0%           | 0.0%           |
| tr F1SH64 F1SH64 |         | 3             | 1          | 1          | 0              | 0              | 0              | 0              | 0              | 3          | 3          | 2          | 0              | 0              | 0              | 0              | 0                 | 5.1%       | 3.3%       | 3.4%       | 0.0%           | 0.0%           | 0.0%           | 0.0%           | 0.0%           |
| tr I3LCL0 I3LCL0 |         | 3             | 0          | 1          | 0              | 0              | 0              | 0              | 0              | 6          | 0          | 2          | 0              | 0              | 0              | 0              | 0                 | 8.7%       | 0.0%       | 2.3%       | 0.0%           | 0.0%           | 0.0%           | 0.0%           | 0.0%           |
| tr I3LJ79 I3LJ79 |         | 6             | 0          | 1          | 0              | 0              | 0              | 0              | 0              | 6          | 0          | 2          | 0              | 0              | 0              | 0              | 0                 | 16.5%      | 0.0%       | 5.6%       | 0.0%           | 0.0%           | 0.0%           | 0.0%           | 0.0%           |
| tr F1S5Q3 F1S5Q3 |         | 2             | 1          | 1          | 0              | 0              | 0              | 0              | 0              | 2          | 4          | 2          | 0              | 0              | 0              | 0              | 0                 | 8.0%       | 3.1%       | 2.1%       | 0.0%           | 0.0%           | 0.0%           | 0.0%           | 0.0%           |
| tr F1S5V0 F1S5V0 |         | 4             | 0          | 1          | 0              | 0              | 0              | 0              | 0              | 6          | 0          | 3          | 0              | 0              | 0              | 0              | 0                 | 15.2%      | 0.0%       | 4.9%       | 0.0%           | 0.0%           | 0.0%           | 0.0%           | 0.0%           |
| P80895           |         | 2             | 1          | 1          | 0              | 0              | 0              | 0              | 0              | 4          | 2          | 3          | 0              | 0              | 0              | 0              | 0                 | 23.3%      | 7.5%       | 4.8%       | 0.0%           | 0.0%           | 0.0%           | 0.0%           | 0.0%           |
| tr K7GN85 K7GN85 |         | 3             | 0          | 1          | 0              | 0              | 0              | 0              | 0              | 6          | 0          | 3          | 0              | 0              | 0              | 0              | 0                 | 29.5%      | 0.0%       | 13.1%      | 0.0%           | 0.0%           | 0.0%           | 0.0%           | 0.0%           |
| tr K7GSN3 K7GSN3 |         | 3             | 0          | 1          | 0              | 0              | 0              | 0              | 0              | 6          | 0          | 3          | 0              | 0              | 0              | 0              | 0                 | 28.3%      | 0.0%       | 12.5%      | 0.0%           | 0.0%           | 0.0%           | 0.0%           | 0.0%           |
| tr F1RG04 F1RG04 |         | 4             | 1          | 1          | 0              | 0              | 0              | 0              | 0              | 5          | 1          | 3          | 0              | 0              | 0              | 0              | 0                 | 9.4%       | 1.9%       | 3.1%       | 0.0%           | 0.0%           | 0.0%           | 0.0%           | 0.0%           |
| tr F1RZC1 F1RZC1 |         | 3             | 2          | 1          | 0              | 0              | 0              | 0              | 0              | 3          | 3          | 3          | 0              | 0              | 0              | 0              | 0                 | 1.8%       | 1.3%       | 0.9%       | 0.0%           | 0.0%           | 0.0%           | 0.0%           | 0.0%           |
| tr J9JIK8 J9JIK8 |         | 2             | 1          | 1          | 0              | 0              | 0              | 0              | 0              | 4          | 2          | 3          | 0              | 0              | 0              | 0              | 0                 | 25.5%      | 8.2%       | 5.3%       | 0.0%           | 0.0%           | 0.0%           | 0.0%           | 0.0%           |
| tr F1RRN2 F1RRN2 |         | 0             | 1          | 2          | 0              | 0              | 0              | 0              | 0              | 0          | 6          | 3          | 0              | 0              | 0              | 0              | 0                 | 0.0%       | 2.9%       | 12.4%      | 0.0%           | 0.0%           | 0.0%           | 0.0%           | 0.0%           |
| tr F1S183 F1S183 |         | 4             | 1          | 2          | 0              | 0              | 0              | 0              | 0              | 5          | 1          | 4          | 0              | 0              | 0              | 0              | 0                 | 53.8%      | 13.6%      | 19.7%      | 0.0%           | 0.0%           | 0.0%           | 0.0%           | 0.0%           |
| tr F1SHU0 F1SHU0 |         | 3             | 0          | 1          | 0              | 0              | 0              | 0              | 0              | 6          | 0          | 4          | 0              | 0              | 0              | 0              | 0                 | 21.1%      | 0.0%       | 7.4%       | 0.0%           | 0.0%           | 0.0%           | 0.0%           | 0.0%           |
| tr K7GRT4 K7GRT4 |         | 1             | 1          | 3          | 0              | 0              | 0              | 0              | 0              | 5          | 1          | 6          | 0              | 0              | 0              | 0              | 0                 | 14.9%      | 11.9%      | 11.3%      | 0.0%           | 0.0%           | 0.0%           | 0.0%           | 0.0%           |
| Q007T0           |         | 2             | 2          | 2          | 0              | 0              | 0              | 0              | 0              | 3          | 3          | 6          | 0              | 0              | 0              | 0              | 0                 | 16.4%      | 8.6%       | 9.6%       | 0.0%           | 0.0%           | 0.0%           | 0.0%           | 0.0%           |
| tr I3LDC1 I3LDC1 |         | 2             | 2          | 2          | 0              | 0              | 0              | 0              | 0              | 3          | 3          | 6          | 0              | 0              | 0              | 0              | 0                 | 16.4%      | 8.6%       | 9.6%       | 0.0%           | 0.0%           | 0.0%           | 0.0%           | 0.0%           |
| tr F1RSL4 F1RSL4 |         | 2             | 2          | 1          | 0              | 0              | 0              | 0              | 0              | 2          | 4          | 6          | 0              | 0              | 0              | 0              | 0                 | 3.2%       | 2.0%       | 1.4%       | 0.0%           | 0.0%           | 0.0%           | 0.0%           | 0.0%           |
| tr I3LCB9 I3LCB9 |         | 2             | 1          | 3          | 0              | 0              | 0              | 0              | 0              | 5          | 1          | 6          | 0              | 0              | 0              | 0              | 0                 | 17.1%      | 17.1%      | 17.1%      | 0.0%           | 0.0%           | 0.0%           | 0.0%           | 0.0%           |
| tr K7GMG1 K7GMG1 |         | 1             | 1          | 3          | 0              | 0              | 0              | 0              | 0              | 5          | 1          | 6          | 0              | 0              | 0              | 0              | 0                 | 11.9%      | 9.5%       | 9.0%       | 0.0%           | 0.0%           | 0.0%           | 0.0%           | 0.0%           |
| tr F1S4P0 F1S4P0 |         | 2             | 0          | 2          | 0              | 0              | 0              | 0              | 0              | 6          | 0          | 6          | 0              | 0              | 0              | 0              | 0                 | 8.1%       | 0.0%       | 4.1%       | 0.0%           | 0.0%           | 0.0%           | 0.0%           | 0.0%           |
| tr F1RQ11 F1RQ11 |         | 4             | 1          | 2          | 0              | 0              | 0              | 0              | 0              | 4          | 2          | 6          | 0              | 0              | 0              | 0              | 0                 | 30.1%      | 28.9%      | 27.7%      | 0.0%           | 0.0%           | 0.0%           | 0.0%           | 0.0%           |
| Q9MYI8           |         | 2             | 3          | 2          | 0              | 0              | 0              | 0              | 0              | 2          | 4          | 7          | 0              | 0              | 0              | 0              | 0                 | 6.4%       | 6.0%       | 6.0%       | 0.0%           | 0.0%           | 0.0%           | 0.0%           | 0.0%           |
| tr K7GR33 K7GR33 |         | 1             | 2          | 2          | 0              | 0              | 0              | 0              | 0              | 3          | 3          | 8          | 0              | 0              | 0              | 0              | 0                 | 7.2%       | 6.0%       | 13.2%      | 0.0%           | 0.0%           | 0.0%           | 0.0%           | 0.0%           |
| tr I3LJY1 I3LJY1 |         | 3             | 1          | 3          | 0              | 0              | 0              | 0              | 0              | 4          | 2          | 10         | 0              | 0              | 0              | 0              | 0                 | 28.2%      | 8.5%       | 28.2%      | 0.0%           | 0.0%           | 0.0%           | 0.0%           | 0.0%           |
| tr F1RZ24 F1RZ24 |         | 5             | 0          | 4          | 0              | 0              | 0              | 0              | 0              | 6          | 0          | 10         | 0              | 0              | 0              | 0              | 0                 | 13.2%      | 0.0%       | 10.7%      | 0.0%           | 0.0%           | 0.0%           | 0.0%           | 0.0%           |
| tr F1RU12 F1RU12 |         | 3             | 0          | 3          | 0              | 0              | 0              | 0              | 0              | 6          | 0          | 14         | 0              | 0              | 0              | 0              | 0                 | 14.6%      | 0.0%       | 14.2%      | 0.0%           | 0.0%           | 0.0%           | 0.0%           | 0.0%           |
| tr I3LQ34 I3LQ34 |         | 3             | 0          | 6          | 0              | 0              | 0              | 0              | 0              | 6          | 0          | 22         | 0              | 0              | 0              | 0              | 0                 | 30.8%      | 0.0%       | 32.7%      | 0.0%           | 0.0%           | 0.0%           | 0.0%           | 0.0%           |
| tr I3LLA8 I3LLA8 |         | 2             | 1          | 2          | 0              | 0              | 0              | 0              | 0              | 2          | 4          | 23         | 0              | 0              | 0              | 0              | 0                 | 5.1%       | 1.8%       | 3.4%       | 0.0%           | 0.0%           | 0.0%           | 0.0%           | 0.0%           |
| tr F1SK41 F1SK41 |         | 1             | 2          | 2          | 0              | 0              | 0              | 0              | 3              | 3          | 2          | 17         | 0              | 0              | 0              | 78             | 26                | 3.6%       | 9.5%       | 6.9%       | 0.0%           | 0.0%           | 0.0%           | 9.5%           | 9.5%           |
| tr F1RYM8 F1RYM8 |         | 3             | 0          | 0          | 0              | 0              | 0              | 0              | 6              | 5          | 0          | 0          | 0              | 0              | 0              | 0              | 21                | 12.3%      | 0.0%       | 0.0%       | 0.0%           | 0.0%           | 0.0%           | 0.0%           | 33.6%          |
| tr I3L674 I3L674 |         | 1             | 0          | 0          | 0              | 0              | 0              | 1              | 1              | 5          | 0          | 0          | 0              | 0              | 0              | 14             | 2                 | 18.9%      | 0.0%       | 0.0%       | 0.0%           | 0.0%           | 0.0%           | 18.9%          | 18.9%          |
| tr Q9N0Y9 Q9N0Y9 |         | 4             | 0          | 2          | 0              | 0              | 0              | 2              | 2              | 5          | 0          | 3          | 0              | 0              | 0              | 13             | 12                | 24.1%      | 0.0%       | 5.1%       | 0.0%           | 0.0%           | 0.0%           | 12.2%          | 11.9%          |
| tr F1RS33 F1RS33 |         | 1             | 0          | 0          | 0              | 0              | 0              | 0              | 1              | 5          | 0          | 0          | 0              | 0              | 0              | 0              | 14                | 53.8%      | 0.0%       | 0.0%       | 0.0%           | 0.0%           | 0.0%           | 0.0%           | 53.8%          |
| tr F1SV26 F1SV26 |         | 0             | 1          | 1          | 0              | 0              | 0              | 2              | 1              | 0          | 5          | 3          | 0              | 0              | 0              | 15             | 3                 | 0.0%       | 2.3%       | 3.5%       | 0.0%           | 0.0%           | 0.0%           | 8.8%           | 3.5%           |
| tr F1RW78 F1RW78 |         | 2             | 1          | 0          | 0              | 0              | 0              | 1              | 1              | 4          | 1          | 0          | 0              | 0              | 0              | 8              | 2                 | 8.1%       | 2.8%       | 0.0%       | 0.0%           | 0.0%           | 0.0%           | 5.3%           | 5.3%           |
| tr I3LIP0 I3LIP0 |         | 2             | 0          | 1          | 0              | 0              | 0              | 1              | 2              | 5          | 0          | 6          | 0              | 0              | 0              | 6              | 14                | 52.2%      | 0.0%       | 14.5%      | 0.0%           | 0.0%           | 0.0%           | 14.5%          | 30.4%          |
| tr F1SJR5 F1SJR5 |         | 1             | 0          | 6          | 0              | 0              | 0              | 1              | 3              | 5          | 0          | 37         | 0              | 0              | 0              | 33             | 42                | 4.7%       | 0.0%       | 17.5%      | 0.0%           | 0.0%           | 0.0%           | 7.0%           | 14.0%          |
| Q5ISC6           |         | 3             | 1          | 3          | 0              | 0              | 0              | 4              | 2              | 4          | 1          | 15         | 0              | 0              | 0              | 26             | 7                 | 29.1%      | 7.9%       | 21.2%      | 0.0%           | 0.0%           | 0.0%           | 38.1%          | 20.6%          |
| tr K7GNH6 K7GNH6 |         | 1             | 1          | 4          | 0              | 0              | 0              | 1              | 1              | 4          | 1          | 43         | 0              | 0              | 0              | 24             | 42                | 32.1%      | 32.1%      | 32.1%      | 0.0%           | 0.0%           | 0.0%           | 32.1%          | 32.1%          |
| tr A5GHK8 A5GHK8 |         | 2             | 1          | 1          | 0              | 0              | 0              | 0              | 2              | 2          | 3          | 3          | 0              | 0              | 0              | 0              | 10                | 5.4%       | 2.2%       | 3.2%       | 0.0%           | 0.0%           | 0.0%           | 0.0%           | 7.5%           |
| P61958           |         | 3             | 0          | 3          | 0              | 0              | 0              | 2              | 2              | 5          | 0          | 18         | 0              | 0              | 0              | 11             | 13                | 27.4%      | 0.0%       | 27.4%      | 0.0%           | 0.0%           | 0.0%           | 50.5%          | 50.5%          |
| tr F1S6H6 F1S6H6 |         | 2             | 1          | 1          | 0              | 0              | 0              | 0              | 3              |            |            |            |                |                |                |                |                   |            |            |            |                |                |                |                |                |

| Sample#          | Peptide Count |            |            |                |                |                |                |   | Spectral Count |            |            |                |                |                |                |    | Sequence Coverage |            |            |                |                |                |                |                |
|------------------|---------------|------------|------------|----------------|----------------|----------------|----------------|---|----------------|------------|------------|----------------|----------------|----------------|----------------|----|-------------------|------------|------------|----------------|----------------|----------------|----------------|----------------|
|                  | Whole Cell    | Whole Cell | Whole Cell | Cilia Fraction | Cilia Fraction | Cilia Fraction | Cilia Fraction |   | Whole Cell     | Whole Cell | Whole Cell | Cilia Fraction | Cilia Fraction | Cilia Fraction | Cilia Fraction |    | Whole Cell        | Whole Cell | Whole Cell | Cilia Fraction |
|                  | 1             | 2          | 6          | 4              | 3              | 5              | 7              | 8 | 1              | 2          | 6          | 4              | 3              | 5              | 7              | 8  | 1                 | 2          | 6          | 4              | 3              | 5              | 7              | 8              |
| Accession        |               |            |            |                |                |                |                |   |                |            |            |                |                |                |                |    |                   |            |            |                |                |                |                |                |
| tr F1RY67 F1RY67 | 2             | 1          | 3          | 0              | 0              | 0              | 0              | 2 | 3              | 2          | 8          | 0              | 0              | 0              | 0              | 4  | 7.8%              | 2.6%       | 8.8%       | 0.0%           | 0.0%           | 0.0%           | 0.0%           | 8.8%           |
| O97763           | 2             | 0          | 1          | 0              | 0              | 0              | 0              | 1 | 5              | 0          | 34         | 0              | 0              | 0              | 0              | 11 | 17.4%             | 0.0%       | 13.4%      | 0.0%           | 0.0%           | 0.0%           | 0.0%           | 10.7%          |
| tr F1SAA5 F1SAA5 | 4             | 0          | 1          | 0              | 0              | 0              | 0              | 1 | 5              | 0          | 6          | 0              | 0              | 0              | 0              | 3  | 18.3%             | 0.0%       | 9.5%       | 0.0%           | 0.0%           | 0.0%           | 0.0%           | 9.5%           |
| Q06AT3           | 4             | 0          | 2          | 0              | 0              | 0              | 0              | 1 | 5              | 0          | 8          | 0              | 0              | 0              | 0              | 3  | 14.0%             | 0.0%       | 12.2%      | 0.0%           | 0.0%           | 0.0%           | 0.0%           | 7.3%           |
| tr F1SAA9 F1SAA9 | 4             | 0          | 2          | 0              | 0              | 0              | 0              | 1 | 5              | 0          | 8          | 0              | 0              | 0              | 0              | 3  | 14.7%             | 0.0%       | 12.8%      | 0.0%           | 0.0%           | 0.0%           | 0.0%           | 7.7%           |
| tr I3LAD5 I3LAD5 | 3             | 0          | 1          | 0              | 0              | 0              | 0              | 1 | 5              | 0          | 4          | 0              | 0              | 0              | 0              | 2  | 12.3%             | 0.0%       | 3.0%       | 0.0%           | 0.0%           | 0.0%           | 0.0%           | 4.5%           |
| tr F1RWA6 F1RWA6 | 3             | 0          | 1          | 0              | 0              | 0              | 0              | 1 | 5              | 0          | 4          | 0              | 0              | 0              | 0              | 2  | 14.2%             | 0.0%       | 3.5%       | 0.0%           | 0.0%           | 0.0%           | 0.0%           | 5.2%           |
| tr F1S596 F1S596 | 4             | 0          | 9          | 0              | 0              | 0              | 0              | 1 | 2              | 5          | 67         | 0              | 0              | 0              | 0              | 4  | 11                | 15.8%      | 0.0%       | 27.4%          | 0.0%           | 0.0%           | 0.0%           | 7.1%           |
| tr F1SH94 F1SH94 | 1             | 1          | 0          | 0              | 0              | 0              | 0              | 1 | 1              | 4          | 0          | 0              | 0              | 0              | 0              | 0  | 1                 | 3.0%       | 1.4%       | 0.0%           | 0.0%           | 0.0%           | 0.0%           | 1.0%           |
| tr F1S7K5 F1S7K5 | 1             | 2          | 0          | 0              | 0              | 0              | 0              | 1 | 2              | 3          | 0          | 0              | 0              | 0              | 0              | 1  | 1                 | 1.2%       | 2.8%       | 0.0%           | 0.0%           | 0.0%           | 0.0%           | 1.2%           |
| tr F1RN87 F1RN87 | 3             | 1          | 0          | 0              | 0              | 0              | 0              | 1 | 4              | 1          | 0          | 0              | 0              | 0              | 0              | 1  | 1                 | 8.8%       | 2.0%       | 0.0%           | 0.0%           | 0.0%           | 0.0%           | 3.3%           |
| tr K7GS62 K7GS62 | 2             | 0          | 0          | 0              | 0              | 0              | 0              | 1 | 0              | 5          | 0          | 0              | 0              | 0              | 0              | 1  | 0                 | 22.4%      | 0.0%       | 0.0%           | 0.0%           | 0.0%           | 10.9%          | 0.0%           |
| tr I3LA44 I3LA44 | 4             | 0          | 0          | 0              | 0              | 0              | 0              | 1 | 5              | 0          | 0          | 0              | 0              | 0              | 0              | 1  | 1                 | 9.3%       | 0.0%       | 0.0%           | 0.0%           | 0.0%           | 0.0%           | 3.1%           |
| tr F1S021 F1S021 | 1             | 1          | 0          | 0              | 0              | 0              | 0              | 1 | 1              | 4          | 0          | 0              | 0              | 0              | 0              | 0  | 1                 | 1.2%       | 0.6%       | 0.0%           | 0.0%           | 0.0%           | 0.0%           | 1.3%           |
| tr F1RZT2 F1RZT2 | 3             | 0          | 0          | 0              | 0              | 0              | 0              | 1 | 5              | 0          | 0          | 0              | 0              | 0              | 0              | 1  | 1                 | 30.2%      | 0.0%       | 0.0%           | 0.0%           | 0.0%           | 0.0%           | 8.5%           |
| tr F1RFH9 F1RFH9 | 2             | 3          | 0          | 0              | 0              | 0              | 0              | 1 | 0              | 2          | 3          | 0              | 0              | 0              | 0              | 1  | 0                 | 3.1%       | 3.2%       | 0.0%           | 0.0%           | 0.0%           | 1.5%           | 0.0%           |
| tr F1ST54 F1ST54 | 1             | 1          | 0          | 0              | 0              | 0              | 0              | 1 | 2              | 3          | 0          | 0              | 0              | 0              | 0              | 0  | 1                 | 1.7%       | 1.7%       | 0.0%           | 0.0%           | 0.0%           | 0.0%           | 1.7%           |
| Q9TDR1           | 3             | 1          | 0          | 0              | 0              | 0              | 0              | 1 | 4              | 1          | 0          | 0              | 0              | 0              | 0              | 1  | 1                 | 5.1%       | 2.0%       | 0.0%           | 0.0%           | 0.0%           | 0.0%           | 2.0%           |
| tr F1STF7 F1STF7 | 2             | 2          | 0          | 0              | 0              | 0              | 0              | 1 | 2              | 3          | 0          | 0              | 0              | 0              | 0              | 0  | 1                 | 18.3%      | 11.2%      | 0.0%           | 0.0%           | 0.0%           | 0.0%           | 10.0%          |
| tr I3L617 I3L617 | 1             | 1          | 0          | 0              | 0              | 0              | 0              | 1 | 2              | 3          | 0          | 0              | 0              | 0              | 0              | 0  | 1                 | 14.4%      | 6.4%       | 0.0%           | 0.0%           | 0.0%           | 0.0%           | 14.4%          |
| tr I3LK62 I3LK62 | 1             | 1          | 0          | 0              | 0              | 0              | 0              | 1 | 2              | 3          | 0          | 0              | 0              | 0              | 0              | 1  | 1                 | 3.6%       | 3.6%       | 0.0%           | 0.0%           | 0.0%           | 0.0%           | 3.6%           |
| tr F1SF51 F1SF51 | 0             | 1          | 0          | 0              | 0              | 0              | 0              | 1 | 0              | 5          | 0          | 0              | 0              | 0              | 0              | 1  | 0                 | 0.0%       | 2.8%       | 0.0%           | 0.0%           | 0.0%           | 3.3%           | 0.0%           |
| tr Q197W4 Q197W4 | 2             | 0          | 1          | 0              | 0              | 0              | 0              | 1 | 5              | 0          | 7          | 0              | 0              | 0              | 0              | 2  | 1                 | 11.0%      | 0.0%       | 6.2%           | 0.0%           | 0.0%           | 0.0%           | 7.5%           |
| tr F1SP27 F1SP27 | 3             | 1          | 1          | 0              | 0              | 0              | 0              | 1 | 3              | 2          | 1          | 0              | 0              | 0              | 0              | 0  | 1                 | 5.0%       | 0.8%       | 1.5%           | 0.0%           | 0.0%           | 0.0%           | 3.3%           |
| tr F1RMD6 F1RMD6 | 1             | 2          | 1          | 0              | 0              | 0              | 0              | 1 | 1              | 4          | 1          | 0              | 0              | 0              | 0              | 0  | 1                 | 3.9%       | 6.2%       | 3.9%           | 0.0%           | 0.0%           | 0.0%           | 2.6%           |
| tr F1SKN6 F1SKN6 | 3             | 0          | 2          | 0              | 0              | 0              | 0              | 1 | 5              | 0          | 4          | 0              | 0              | 0              | 0              | 1  | 1                 | 5.7%       | 0.0%       | 7.9%           | 0.0%           | 0.0%           | 0.0%           | 1.7%           |
| tr F1SR21 F1SR21 | 2             | 0          | 3          | 0              | 0              | 0              | 0              | 1 | 5              | 0          | 14         | 0              | 0              | 0              | 0              | 1  | 1                 | 4.1%       | 0.0%       | 5.9%           | 0.0%           | 0.0%           | 3.3%           | 3.3%           |
| tr F1S4R5 F1S4R5 | 4             | 0          | 4          | 0              | 0              | 0              | 0              | 3 | 5              | 0          | 60         | 0              | 0              | 0              | 0              | 6  | 11                | 11.9%      | 0.0%       | 14.2%          | 0.0%           | 0.0%           | 0.0%           | 11.9%          |
| tr F1SMK2 F1SMK2 | 3             | 0          | 2          | 0              | 0              | 0              | 0              | 2 | 5              | 0          | 17         | 0              | 0              | 0              | 0              | 2  | 2                 | 13.3%      | 0.0%       | 5.7%           | 0.0%           | 0.0%           | 0.0%           | 9.1%           |
| A9YUB1           | 4             | 0          | 3          | 0              | 0              | 0              | 0              | 1 | 5              | 0          | 12         | 0              | 0              | 0              | 0              | 0  | 1                 | 16.9%      | 0.0%       | 17.2%          | 0.0%           | 0.0%           | 0.0%           | 4.8%           |
| tr F1SBQ7 F1SBQ7 | 4             | 1          | 5          | 0              | 0              | 0              | 0              | 1 | 4              | 1          | 14         | 0              | 0              | 0              | 0              | 0  | 1                 | 4.7%       | 0.6%       | 4.1%           | 0.0%           | 0.0%           | 0.0%           | 1.3%           |
| tr F1SMR3 F1SMR3 | 2             | 1          | 1          | 0              | 0              | 0              | 0              | 1 | 3              | 2          | 18         | 0              | 0              | 0              | 0              | 1  | 1                 | 6.3%       | 3.0%       | 4.5%           | 0.0%           | 0.0%           | 0.0%           | 2.4%           |
| tr I3LPW0 I3LPW0 | 2             | 1          | 4          | 0              | 0              | 0              | 0              | 1 | 3              | 2          | 37         | 0              | 0              | 0              | 0              | 0  | 1                 | 25.6%      | 10.1%      | 32.6%          | 0.0%           | 0.0%           | 0.0%           | 10.1%          |
| A2TLM1           | 4             | 0          | 0          | 0              | 0              | 0              | 0              | 0 | 5              | 0          | 0          | 0              | 0              | 0              | 0              | 0  | 0                 | 12.1%      | 0.0%       | 0.0%           | 0.0%           | 0.0%           | 0.0%           | 0.0%           |
| tr D7RA29 D7RA29 | 3             | 0          | 0          | 0              | 0              | 0              | 0              | 0 | 5              | 0          | 0          | 0              | 0              | 0              | 0              | 0  | 0                 | 21.6%      | 0.0%       | 0.0%           | 0.0%           | 0.0%           | 0.0%           | 0.0%           |
| tr K7GPH1 K7GPH1 | 1             | 0          | 0          | 0              | 0              | 0              | 0              | 0 | 5              | 0          | 0          | 0              | 0              | 0              | 0              | 0  | 0                 | 18.2%      | 0.0%       | 0.0%           | 0.0%           | 0.0%           | 0.0%           | 0.0%           |
| tr I3LKG9 I3LKG9 | 4             | 1          | 0          | 0              | 0              | 0              | 0              | 0 | 4              | 1          | 0          | 0              | 0              | 0              | 0              | 0  | 0                 | 7.8%       | 1.2%       | 0.0%           | 0.0%           | 0.0%           | 0.0%           | 0.0%           |
| tr F1RK56 F1RK56 | 1             | 1          | 0          | 0              | 0              | 0              | 0              | 0 | 1              | 4          | 0          | 0              | 0              | 0              | 0              | 0  | 0                 | 5.4%       | 5.4%       | 0.0%           | 0.0%           | 0.0%           | 0.0%           | 0.0%           |
| tr F1SRT1 F1SRT1 | 2             | 1          | 0          | 0              | 0              | 0              | 0              | 0 | 2              | 3          | 0          | 0              | 0              | 0              | 0              | 0  | 0                 | 23.5%      | 8.7%       | 0.0%           | 0.0%           | 0.0%           | 0.0%           | 0.0%           |
| tr F1SBB8 F1SBB8 | 0             | 1          | 0          | 0              | 0              | 0              | 0              | 0 | 0              | 5          | 0          | 0              | 0              | 0              | 0              | 0  | 0                 | 0.0%       | 9.0%       | 0.0%           | 0.0%           | 0.0%           | 0.0%           | 0.0%           |
| Q95JC8           | 3             | 1          | 0          | 0              | 0              | 0              | 0              | 0 | 4              | 1          | 0          | 0              | 0              | 0              | 0              | 0  | 0                 | 16.5%      | 5.3%       | 0.0%           | 0.0%           | 0.0%           | 0.0%           | 0.0%           |
| tr F1S663 F1S663 | 4             | 0          | 0          | 0              | 0              | 0              | 0              | 0 | 5              | 0          | 0          | 0              | 0              | 0              | 0              | 0  | 0                 | 4.8%       | 0.0%       | 0.0%           | 0.0%           | 0.0%           | 0.0%           | 0.0%           |
| tr F1SV16 F1SV16 | 1             | 2          | 0          | 0              | 0              | 0              | 0              | 0 | 1              | 4          | 0          | 0              | 0              | 0              | 0              | 0  | 0                 | 4.7%       | 9.0%       | 0.0%           | 0.0%           | 0.0%           | 0.0%           | 0.0%           |
| tr K7GQI5 K7GQI5 | 2             | 0          | 0          | 0              | 0              | 0              | 0              | 0 | 5              | 0          | 0          | 0              | 0              | 0              | 0              | 0  | 0                 | 14.8%      | 0.0%       | 0.0%           | 0.0%           | 0.0%           | 0.0%           | 0.0%           |
| tr F1RT00 F1RT00 | 2             | 1          | 0          | 0              | 0              | 0              | 0              | 0 | 3              | 2          | 0          | 0              | 0              | 0              | 0              | 0  | 0                 | 18.5%      | 5.6%       | 0.0%           | 0.0%           | 0.0%           | 0.0%           | 0.0%           |
| tr F1SHF6 F1SHF6 | 0             | 2          | 0          | 0              | 0              | 0              | 0              | 0 | 0              | 5          | 0          | 0              | 0              | 0              | 0              | 0  | 0                 | 0.0%       | 0.7%       | 0.0%           | 0.0%           | 0.0%           | 0.0%           | 0.0%           |
| tr F1SQ06 F1SQ06 | 1             | 1          | 0          | 0              | 0              | 0              | 0              | 0 | 4              | 1          | 0          | 0              | 0              | 0              | 0              | 0  | 0                 | 11.1%      | 11.1%      | 0.0%           | 0.0%           | 0.0%           | 0.0%           | 0.0%           |
| tr F1RNI5 F1RNI5 | 1             | 0          | 0          | 0              | 0              | 0              | 0              | 0 | 5              | 0          | 0          | 0              | 0              | 0              | 0              | 0  | 0                 | 41.7%      | 0.0%       | 0.0%           | 0.0%           | 0.0%           | 0.0%           | 0.0%           |
| tr F1S3V9 F1S3V9 | 5             | 0          | 0          | 0              | 0              | 0              | 0              | 0 | 5              | 0          | 0          | 0              | 0              | 0              | 0              | 0  | 0                 | 5.3%       | 0.0%       | 0.0%           | 0.0%           | 0.0%           | 0.0%           | 0.0%           |
| tr K7GS23 K7GS23 | 2             | 0          | 0          | 0              | 0              | 0              | 0              | 0 | 5              | 0          | 0          | 0              | 0              | 0              | 0              | 0  | 0                 | 5.0%       | 0.0%       | 0.0%           | 0.0%           | 0.0%           | 0.0%           | 0.0%           |
| tr F1S842 F1S842 | 5             | 0          | 0          | 0              | 0              | 0              | 0              | 0 | 5              | 0          | 0          | 0              | 0              | 0              | 0              | 0  | 0                 | 5.3%       | 0.0%       | 0.0%           | 0.0%           | 0.0%           | 0.0%           | 0.0%           |
| tr F1SUQ0 F1SUQ0 | 0             | 1          | 0          | 0              | 0              | 0              | 0              | 0 | 0              | 5          | 0          | 0              | 0              | 0              | 0              | 0  | 0                 | 0.0%       | 3.0%       | 0.0%           | 0.0%           | 0.0%           | 0.0%           | 0.0%           |
| P41566           | 2             | 1          | 0          | 0              | 0              | 0              | 0              | 0 | 4              | 1          | 0          | 0              | 0              | 0              | 0              | 0  | 0                 | 31.1%      | 12.3%      | 0.0%           | 0.0%           | 0.0%           | 0.0%           | 0.0%           |
| tr I3LA81 I3LA81 | 1             | 2          | 0          | 0              | 0              | 0              | 0              | 0 | 2              | 3          | 0          | 0              | 0              | 0              | 0              | 0  | 0                 | 9.8%       | 18.9%      | 0.0%           | 0.0%           | 0.0%           | 0.0%           | 0.0%           |
| tr F1SDB8 F1SDB8 | 1             | 2          | 0          | 0              | 0              | 0              | 0              | 0 | 1              | 4          | 0          | 0              | 0              | 0              | 0              | 0  | 0                 | 1.5%       | 2.3%       | 0.0%           | 0.0%           | 0.0%           | 0.0%           | 0.0%           |
| tr F1SBP5 F1SBP5 | 3             | 0          | 0          | 0              | 0              | 0              | 0              | 0 | 5              | 0          | 0          | 0              | 0              | 0              | 0              | 0  | 0                 | 6.7%       | 0.0%       | 0.0%           | 0.0%           | 0.0%           | 0.0%           | 0.0%           |
| tr I3LVJ9 I3LVJ9 | 1             | 2          | 0          | 0              | 0              | 0              | 0              | 0 | 1              | 4          | 0          | 0              | 0              | 0              | 0              | 0  | 0                 | 12.8%      | 18.0%      | 0.0%           | 0.0%           | 0.0%           | 0.0%           | 0.0%           |
| tr F1SD78 F1SD78 | 2             | 0          | 0          | 0              | 0              | 0              | 0              | 0 | 5              | 0          | 0          | 0              | 0              | 0              | 0              | 0  | 0                 | 14.8%      | 0.0%       | 0.0%           | 0.0%           | 0.0%           | 0.0%           | 0.0%           |
| tr I3L812 I3L812 | 1             | 1          | 0          | 0              | 0              | 0              | 0              | 0 | 4              | 1          | 0          | 0              | 0              | 0              | 0              | 0  | 0                 | 2.4%       | 2.4%       | 0.0%           | 0.0%           | 0.0%           | 0.0%           | 0.0%           |
| tr I3L997 I3L997 | 3             | 0          | 0          | 0              | 0              | 0              | 0              | 0 | 5              | 0          | 0          | 0              | 0              | 0              | 0              | 0  | 0                 | 18.8%      | 0.0%       | 0.0%           | 0.0%           | 0.0%           | 0.0%           | 0.0%           |
| tr I3LKA7 I3LKA7 | 2             | 0          | 0          | 0              | 0              | 0              | 0              | 0 | 5              | 0          | 0          | 0              | 0              | 0              | 0              | 0  | 0                 | 9.0%       | 0.0%       | 0.0%           | 0.0%           | 0.0%           | 0.0%           | 0.0%           |
| tr F1RPI9 F1RPI9 | 0             | 1          | 0          | 0              | 0              | 0              | 0              | 0 | 0              | 5          | 0          | 0              | 0              | 0              | 0              | 0  | 0                 | 0.0%       | 1.9%       | 0.0%           | 0.0%           | 0.0%           | 0.0%           | 0.0%           |
| tr Q0KKC2 Q0KKC2 | 1             | 1          | 0          | 0              | 0              | 0              | 0              | 0 | 2              | 3          | 0          | 0              | 0              | 0              | 0              | 0  | 0                 | 3.8%       | 1.8%       | 0.0%           | 0.0%           | 0.0%           | 0.0%           | 0.0%           |
| O79875           | 0             | 3          | 0          | 0              | 0              | 0              | 0              | 0 | 0              | 5          | 0          | 0              | 0              | 0              | 0              | 0  | 0                 | 0.0%       | 6.6%       |                |                |                |                |                |

| Sample#            | Peptide Count |            |            |                |                |                |                |                | Spectral Count |            |            |                |                |                |                |                | Sequence Coverage |            |            |                |                |                |                |                |
|--------------------|---------------|------------|------------|----------------|----------------|----------------|----------------|----------------|----------------|------------|------------|----------------|----------------|----------------|----------------|----------------|-------------------|------------|------------|----------------|----------------|----------------|----------------|----------------|
|                    | Whole Cell    | Whole Cell | Whole Cell | Cilia Fraction | Whole Cell     | Whole Cell | Whole Cell | Cilia Fraction | Whole Cell        | Whole Cell | Whole Cell | Cilia Fraction |
|                    | 1             | 2          | 6          | 4              | 3              | 5              | 7              | 8              | 1              | 2          | 6          | 4              | 3              | 5              | 7              | 8              | 1                 | 2          | 6          | 4              | 3              | 5              | 7              | 8              |
| Accession          |               |            |            |                |                |                |                |                |                |            |            |                |                |                |                |                |                   |            |            |                |                |                |                |                |
| D3K5L7             | 2             | 1          | 0          | 0              | 0              | 0              | 0              | 0              | 4              | 1          | 0          | 0              | 0              | 0              | 0              | 0              | 6.3%              | 3.7%       | 0.0%       | 0.0%           | 0.0%           | 0.0%           | 0.0%           | 0.0%           |
| tr I3LQ20 I3LQ20   | 2             | 1          | 0          | 0              | 0              | 0              | 0              | 0              | 2              | 3          | 0          | 0              | 0              | 0              | 0              | 0              | 31.1%             | 9.7%       | 0.0%       | 0.0%           | 0.0%           | 0.0%           | 0.0%           | 0.0%           |
| tr I3L8G2 I3L8G2   | 0             | 2          | 0          | 0              | 0              | 0              | 0              | 0              | 0              | 5          | 0          | 0              | 0              | 0              | 0              | 0              | 0.0%              | 5.0%       | 0.0%       | 0.0%           | 0.0%           | 0.0%           | 0.0%           | 0.0%           |
| tr F1RYV4 F1RYV4   | 0             | 1          | 0          | 0              | 0              | 0              | 0              | 0              | 0              | 5          | 0          | 0              | 0              | 0              | 0              | 0              | 0.0%              | 9.0%       | 0.0%       | 0.0%           | 0.0%           | 0.0%           | 0.0%           | 0.0%           |
| tr F1RIT6 F1RIT6   | 3             | 1          | 0          | 0              | 0              | 0              | 0              | 0              | 4              | 1          | 0          | 0              | 0              | 0              | 0              | 0              | 6.0%              | 2.1%       | 0.0%       | 0.0%           | 0.0%           | 0.0%           | 0.0%           | 0.0%           |
| tr F1SJA3 F1SJA3   | 2             | 0          | 0          | 0              | 0              | 0              | 0              | 0              | 5              | 0          | 0          | 0              | 0              | 0              | 0              | 0              | 8.2%              | 0.0%       | 0.0%       | 0.0%           | 0.0%           | 0.0%           | 0.0%           | 0.0%           |
| DOVWV4             | 2             | 1          | 0          | 0              | 0              | 0              | 0              | 0              | 4              | 1          | 0          | 0              | 0              | 0              | 0              | 0              | 11.8%             | 9.5%       | 0.0%       | 0.0%           | 0.0%           | 0.0%           | 0.0%           | 0.0%           |
| tr I3LJT9 I3LJT9   | 2             | 0          | 0          | 0              | 0              | 0              | 0              | 0              | 5              | 0          | 0          | 0              | 0              | 0              | 0              | 0              | 9.9%              | 0.0%       | 0.0%       | 0.0%           | 0.0%           | 0.0%           | 0.0%           | 0.0%           |
| tr I3LFQ0 I3LFQ0   | 0             | 1          | 0          | 0              | 0              | 0              | 0              | 0              | 0              | 5          | 0          | 0              | 0              | 0              | 0              | 0              | 0.0%              | 4.6%       | 0.0%       | 0.0%           | 0.0%           | 0.0%           | 0.0%           | 0.0%           |
| tr F1SQT5 F1SQT5   | 1             | 2          | 0          | 0              | 0              | 0              | 0              | 0              | 1              | 4          | 0          | 0              | 0              | 0              | 0              | 0              | 1.4%              | 2.6%       | 0.0%       | 0.0%           | 0.0%           | 0.0%           | 0.0%           | 0.0%           |
| tr F1RME2 F1RME2   | 4             | 0          | 0          | 0              | 0              | 0              | 0              | 0              | 5              | 0          | 0          | 0              | 0              | 0              | 0              | 0              | 22.5%             | 0.0%       | 0.0%       | 0.0%           | 0.0%           | 0.0%           | 0.0%           | 0.0%           |
| tr F1SIA1 F1SIA1   | 1             | 1          | 0          | 0              | 0              | 0              | 0              | 0              | 1              | 4          | 0          | 0              | 0              | 0              | 0              | 0              | 1.3%              | 1.3%       | 0.0%       | 0.0%           | 0.0%           | 0.0%           | 0.0%           | 0.0%           |
| tr I3L5B8 I3L5B8   | 2             | 1          | 0          | 0              | 0              | 0              | 0              | 0              | 3              | 2          | 0          | 0              | 0              | 0              | 0              | 0              | 6.3%              | 4.0%       | 0.0%       | 0.0%           | 0.0%           | 0.0%           | 0.0%           | 0.0%           |
| Q29223             | 0             | 1          | 0          | 0              | 0              | 0              | 0              | 0              | 0              | 5          | 0          | 0              | 0              | 0              | 0              | 0              | 0.0%              | 8.5%       | 0.0%       | 0.0%           | 0.0%           | 0.0%           | 0.0%           | 0.0%           |
| Q29244             | 2             | 0          | 0          | 0              | 0              | 0              | 0              | 0              | 5              | 0          | 0          | 0              | 0              | 0              | 0              | 0              | 12.7%             | 0.0%       | 0.0%       | 0.0%           | 0.0%           | 0.0%           | 0.0%           | 0.0%           |
| tr K7GQE9 K7GQE9   | 2             | 0          | 0          | 0              | 0              | 0              | 0              | 0              | 5              | 0          | 0          | 0              | 0              | 0              | 0              | 0              | 14.6%             | 0.0%       | 0.0%       | 0.0%           | 0.0%           | 0.0%           | 0.0%           | 0.0%           |
| tr F1RMM3 F1RMM3   | 0             | 2          | 0          | 0              | 0              | 0              | 0              | 0              | 0              | 5          | 0          | 0              | 0              | 0              | 0              | 0              | 0.0%              | 2.4%       | 0.0%       | 0.0%           | 0.0%           | 0.0%           | 0.0%           | 0.0%           |
| tr F1RTF0 F1RTF0   | 3             | 1          | 0          | 0              | 0              | 0              | 0              | 0              | 4              | 1          | 0          | 0              | 0              | 0              | 0              | 0              | 1.9%              | 0.6%       | 0.0%       | 0.0%           | 0.0%           | 0.0%           | 0.0%           | 0.0%           |
| tr K7GQ35 K7GQ35   | 3             | 0          | 0          | 0              | 0              | 0              | 0              | 0              | 5              | 0          | 0          | 0              | 0              | 0              | 0              | 0              | 15.0%             | 0.0%       | 0.0%       | 0.0%           | 0.0%           | 0.0%           | 0.0%           | 0.0%           |
| tr F2Z5B9 F2Z5B9   | 0             | 1          | 0          | 0              | 0              | 0              | 0              | 0              | 0              | 5          | 0          | 0              | 0              | 0              | 0              | 0              | 0.0%              | 8.5%       | 0.0%       | 0.0%           | 0.0%           | 0.0%           | 0.0%           | 0.0%           |
| tr F1SLQ3 F1SLQ3   | 2             | 2          | 0          | 0              | 0              | 0              | 0              | 0              | 3              | 2          | 0          | 0              | 0              | 0              | 0              | 0              | 28.4%             | 28.4%      | 0.0%       | 0.0%           | 0.0%           | 0.0%           | 0.0%           | 0.0%           |
| tr F1STC1 F1STC1   | 4             | 0          | 0          | 0              | 0              | 0              | 0              | 0              | 5              | 0          | 0          | 0              | 0              | 0              | 0              | 0              | 12.1%             | 0.0%       | 0.0%       | 0.0%           | 0.0%           | 0.0%           | 0.0%           | 0.0%           |
| tr I3L9Y6 I3L9Y6   | 4             | 0          | 0          | 0              | 0              | 0              | 0              | 0              | 5              | 0          | 0          | 0              | 0              | 0              | 0              | 0              | 35.2%             | 0.0%       | 0.0%       | 0.0%           | 0.0%           | 0.0%           | 0.0%           | 0.0%           |
| tr F1SA96 F1SA96   | 2             | 1          | 0          | 0              | 0              | 0              | 0              | 0              | 3              | 2          | 0          | 0              | 0              | 0              | 0              | 0              | 6.0%              | 3.2%       | 0.0%       | 0.0%           | 0.0%           | 0.0%           | 0.0%           | 0.0%           |
| tr K7GL09 K7GL09   | 2             | 0          | 0          | 0              | 0              | 0              | 0              | 0              | 5              | 0          | 0          | 0              | 0              | 0              | 0              | 0              | 11.1%             | 0.0%       | 0.0%       | 0.0%           | 0.0%           | 0.0%           | 0.0%           | 0.0%           |
| tr K7GMM8 K7GMM8   | 2             | 0          | 0          | 0              | 0              | 0              | 0              | 0              | 5              | 0          | 0          | 0              | 0              | 0              | 0              | 0              | 13.9%             | 0.0%       | 0.0%       | 0.0%           | 0.0%           | 0.0%           | 0.0%           | 0.0%           |
| tr I3LIX7 I3LIX7   | 3             | 1          | 0          | 0              | 0              | 0              | 0              | 0              | 4              | 1          | 0          | 0              | 0              | 0              | 0              | 0              | 6.1%              | 1.5%       | 0.0%       | 0.0%           | 0.0%           | 0.0%           | 0.0%           | 0.0%           |
| tr F1SJK6 F1SJK6   | 2             | 1          | 0          | 0              | 0              | 0              | 0              | 0              | 3              | 2          | 0          | 0              | 0              | 0              | 0              | 0              | 11.8%             | 3.0%       | 0.0%       | 0.0%           | 0.0%           | 0.0%           | 0.0%           | 0.0%           |
| tr H9KVVH1 H9KVVH1 | 0             | 3          | 0          | 0              | 0              | 0              | 0              | 0              | 0              | 5          | 0          | 0              | 0              | 0              | 0              | 0              | 0.0%              | 6.6%       | 0.0%       | 0.0%           | 0.0%           | 0.0%           | 0.0%           | 0.0%           |
| tr I3LPM1 I3LPM1   | 3             | 1          | 0          | 0              | 0              | 0              | 0              | 0              | 4              | 1          | 0          | 0              | 0              | 0              | 0              | 0              | 10.8%             | 5.6%       | 0.0%       | 0.0%           | 0.0%           | 0.0%           | 0.0%           | 0.0%           |
| tr F1SGR1 F1SGR1   | 0             | 1          | 0          | 0              | 0              | 0              | 0              | 0              | 0              | 5          | 0          | 0              | 0              | 0              | 0              | 0              | 0.0%              | 0.6%       | 0.0%       | 0.0%           | 0.0%           | 0.0%           | 0.0%           | 0.0%           |
| tr F1STU7 F1STU7   | 3             | 0          | 0          | 0              | 0              | 0              | 0              | 0              | 5              | 0          | 0          | 0              | 0              | 0              | 0              | 0              | 19.5%             | 0.0%       | 0.0%       | 0.0%           | 0.0%           | 0.0%           | 0.0%           | 0.0%           |
| tr I3LLQ7 I3LLQ7   | 2             | 1          | 0          | 0              | 0              | 0              | 0              | 0              | 2              | 3          | 0          | 0              | 0              | 0              | 0              | 0              | 12.7%             | 4.9%       | 0.0%       | 0.0%           | 0.0%           | 0.0%           | 0.0%           | 0.0%           |
| tr F1SMH5 F1SMH5   | 0             | 1          | 0          | 0              | 0              | 0              | 0              | 0              | 0              | 5          | 0          | 0              | 0              | 0              | 0              | 0              | 0.0%              | 2.8%       | 0.0%       | 0.0%           | 0.0%           | 0.0%           | 0.0%           | 0.0%           |
| tr F1RXY7 F1RXY7   | 3             | 0          | 0          | 0              | 0              | 0              | 0              | 0              | 5              | 0          | 0          | 0              | 0              | 0              | 0              | 0              | 18.0%             | 0.0%       | 0.0%       | 0.0%           | 0.0%           | 0.0%           | 0.0%           | 0.0%           |
| tr I3LCM4 I3LCM4   | 2             | 1          | 0          | 0              | 0              | 0              | 0              | 0              | 4              | 1          | 0          | 0              | 0              | 0              | 0              | 0              | 8.0%              | 3.2%       | 0.0%       | 0.0%           | 0.0%           | 0.0%           | 0.0%           | 0.0%           |
| tr F1SR70 F1SR70   | 2             | 1          | 0          | 0              | 0              | 0              | 0              | 0              | 3              | 2          | 0          | 0              | 0              | 0              | 0              | 0              | 15.7%             | 3.1%       | 0.0%       | 0.0%           | 0.0%           | 0.0%           | 0.0%           | 0.0%           |
| tr F1RGQ5 F1RGQ5   | 1             | 0          | 0          | 0              | 0              | 0              | 0              | 0              | 5              | 0          | 0          | 0              | 0              | 0              | 0              | 0              | 11.2%             | 0.0%       | 0.0%       | 0.0%           | 0.0%           | 0.0%           | 0.0%           | 0.0%           |
| tr F1S8N5 F1S8N5   | 1             | 3          | 0          | 0              | 0              | 0              | 0              | 0              | 1              | 4          | 0          | 0              | 0              | 0              | 0              | 0              | 0.4%              | 1.4%       | 0.0%       | 0.0%           | 0.0%           | 0.0%           | 0.0%           | 0.0%           |
| tr F1RWH6 F1RWH6   | 3             | 1          | 0          | 0              | 0              | 0              | 0              | 0              | 4              | 1          | 0          | 0              | 0              | 0              | 0              | 0              | 7.0%              | 6.1%       | 0.0%       | 0.0%           | 0.0%           | 0.0%           | 0.0%           | 0.0%           |
| tr I3L9M0 I3L9M0   | 4             | 0          | 0          | 0              | 0              | 0              | 0              | 0              | 5              | 0          | 0          | 0              | 0              | 0              | 0              | 0              | 41.8%             | 0.0%       | 0.0%       | 0.0%           | 0.0%           | 0.0%           | 0.0%           | 0.0%           |
| tr I3LEC4 I3LEC4   | 0             | 1          | 0          | 0              | 0              | 0              | 0              | 0              | 0              | 5          | 0          | 0              | 0              | 0              | 0              | 0              | 0.0%              | 0.7%       | 0.0%       | 0.0%           | 0.0%           | 0.0%           | 0.0%           | 0.0%           |
| tr F1SDW4 F1SDW4   | 0             | 1          | 0          | 0              | 0              | 0              | 0              | 0              | 0              | 5          | 0          | 0              | 0              | 0              | 0              | 0              | 0.0%              | 1.2%       | 0.0%       | 0.0%           | 0.0%           | 0.0%           | 0.0%           | 0.0%           |
| tr I3LSY7 I3LSY7   | 2             | 1          | 0          | 0              | 0              | 0              | 0              | 0              | 3              | 2          | 0          | 0              | 0              | 0              | 0              | 0              | 11.9%             | 3.0%       | 0.0%       | 0.0%           | 0.0%           | 0.0%           | 0.0%           | 0.0%           |
| tr I3L635 I3L635   | 5             | 0          | 0          | 0              | 0              | 0              | 0              | 0              | 5              | 0          | 0          | 0              | 0              | 0              | 0              | 0              | 15.9%             | 0.0%       | 0.0%       | 0.0%           | 0.0%           | 0.0%           | 0.0%           | 0.0%           |
| tr F1SKG9 F1SKG9   | 1             | 2          | 0          | 0              | 0              | 0              | 0              | 0              | 1              | 4          | 0          | 0              | 0              | 0              | 0              | 0              | 1.0%              | 2.6%       | 0.0%       | 0.0%           | 0.0%           | 0.0%           | 0.0%           | 0.0%           |
| tr E7CX51 E7CX51   | 4             | 1          | 0          | 0              | 0              | 0              | 0              | 0              | 4              | 1          | 0          | 0              | 0              | 0              | 0              | 0              | 7.7%              | 2.2%       | 0.0%       | 0.0%           | 0.0%           | 0.0%           | 0.0%           | 0.0%           |
| tr F1RUR7 F1RUR7   | 4             | 1          | 0          | 0              | 0              | 0              | 0              | 0              | 4              | 1          | 0          | 0              | 0              | 0              | 0              | 0              | 12.4%             | 1.8%       | 0.0%       | 0.0%           | 0.0%           | 0.0%           | 0.0%           | 0.0%           |
| tr F1RTK6 F1RTK6   | 3             | 0          | 0          | 0              | 0              | 0              | 0              | 0              | 5              | 0          | 0          | 0              | 0              | 0              | 0              | 0              | 14.9%             | 0.0%       | 0.0%       | 0.0%           | 0.0%           | 0.0%           | 0.0%           | 0.0%           |
| tr I3L781 I3L781   | 2             | 1          | 0          | 0              | 0              | 0              | 0              | 0              | 4              | 1          | 0          | 0              | 0              | 0              | 0              | 0              | 3.0%              | 1.4%       | 0.0%       | 0.0%           | 0.0%           | 0.0%           | 0.0%           | 0.0%           |
| tr F1SVD4 F1SVD4   | 1             | 1          | 0          | 0              | 0              | 0              | 0              | 0              | 1              | 4          | 0          | 0              | 0              | 0              | 0              | 0              | 3.8%              | 4.4%       | 0.0%       | 0.0%           | 0.0%           | 0.0%           | 0.0%           | 0.0%           |
| tr I3L6N5 I3L6N5   | 0             | 2          | 0          | 0              | 0              | 0              | 0              | 0              | 0              | 5          | 0          | 0              | 0              | 0              | 0              | 0              | 0.0%              | 5.0%       | 0.0%       | 0.0%           | 0.0%           | 0.0%           | 0.0%           | 0.0%           |
| tr F1RNV8 F1RNV8   | 3             | 1          | 0          | 0              | 0              | 0              | 0              | 0              | 3              | 2          | 0          | 0              | 0              | 0              | 0              | 0              | 7.0%              | 3.0%       | 0.0%       | 0.0%           | 0.0%           | 0.0%           | 0.0%           | 0.0%           |
| tr F1SV55 F1SV55   | 0             | 3          | 0          | 0              | 0              | 0              | 0              | 0              | 0              | 5          | 0          | 0              | 0              | 0              | 0              | 0              | 0.0%              | 10.5%      | 0.0%       | 0.0%           | 0.0%           | 0.0%           | 0.0%           | 0.0%           |
| tr F1SEZ4 F1SEZ4   | 3             | 0          | 0          | 0              | 0              | 0              | 0              | 0              | 5              | 0          | 0          | 0              | 0              | 0              | 0              | 0              | 8.2%              | 0.0%       | 0.0%       | 0.0%           | 0.0%           | 0.0%           | 0.0%           | 0.0%           |
| tr F1SOV6 F1SOV6   | 3             | 1          | 0          | 0              | 0              | 0              | 0              | 0              | 4              | 1          | 0          | 0              | 0              | 0              | 0              | 0              | 50.8%             | 7.3%       | 0.0%       | 0.0%           | 0.0%           | 0.0%           | 0.0%           | 0.0%           |
| tr F1S569 F1S569   | 1             | 2          | 0          | 0              | 0              | 0              | 0              | 0              | 1              | 4          | 0          | 0              | 0              | 0              | 0              | 0              | 7.0%              | 9.5%       | 0.0%       | 0.0%           | 0.0%           | 0.0%           | 0.0%           | 0.0%           |
| tr F2Z5G7 F2Z5G7   | 2             | 1          | 0          | 0              | 0              | 0              | 0              | 0              | 2              | 3          | 0          | 0              | 0              | 0              | 0              | 0              | 15.5%             | 4.6%       | 0.0%       | 0.0%           | 0.0%           | 0.0%           | 0.0%           | 0.0%           |
| tr I3LSZ6 I3LSZ6   | 3             | 1          | 0          | 0              | 0              | 0              | 0              | 0              | 3              | 2          | 0          | 0              | 0              | 0              | 0              | 0              | 19.5%             | 4.2%       | 0.0%       | 0.0%           | 0.0%           | 0.0%           | 0.0%           | 0.0%           |
| tr F1RQY4 F1RQY4   | 5             | 0          | 1          | 0              | 0              | 0              | 0              | 0              | 5              | 0          | 1          | 0              | 0              | 0              | 0              | 0              | 8.7%              | 0.0%       | 2.8%       | 0.0%           | 0.0%           | 0.0%           | 0.0%           | 0.0%           |
| tr K7GSF7 K7GSF7   | 0             | 1          | 1          | 0              | 0              | 0              | 0              | 0              | 0              | 5          | 1          | 0              | 0              | 0              | 0              | 0              | 0.0%              | 0.8%       | 0.8%       | 0.0%           | 0.0%           | 0.0%           | 0.0%           | 0.0%           |
| tr F1RGR6 F1RGR6   | 1             | 2          | 1          | 0              | 0              | 0              | 0              | 0              | 1              | 4          | 1          | 0              | 0              | 0              | 0              | 0              | 26.6%             | 26.6%      | 12.8%      | 0.0%           | 0.0%           | 0.0%           | 0.0%           | 0.0%           |
| tr F1S1L9 F1S1L9   | 2             | 0          | 1          | 0              | 0              | 0              | 0              | 0              | 5              | 0          | 1          | 0              | 0              | 0              | 0              | 0              | 8.2%              | 0.0%       | 2.7%       | 0.0%           | 0.0%           | 0.0%           | 0.0%           | 0.0%           |
| tr F1S7B0 F1S7B0   | 0             | 2          | 1          |                |                |                |                |                |                |            |            |                |                |                |                |                |                   |            |            |                |                |                |                |                |

| Sample#          | Peptide Count |            |            |                |                |                |                | Spectral Count |            |            |                |                |                |                | Sequence Coverage |            |            |                |                |                |                |      |       |       |
|------------------|---------------|------------|------------|----------------|----------------|----------------|----------------|----------------|------------|------------|----------------|----------------|----------------|----------------|-------------------|------------|------------|----------------|----------------|----------------|----------------|------|-------|-------|
|                  | Whole Cell    | Whole Cell | Whole Cell | Cilia Fraction | Cilia Fraction | Cilia Fraction | Cilia Fraction | Whole Cell     | Whole Cell | Whole Cell | Cilia Fraction | Cilia Fraction | Cilia Fraction | Cilia Fraction | Whole Cell        | Whole Cell | Whole Cell | Cilia Fraction | Cilia Fraction | Cilia Fraction | Cilia Fraction |      |       |       |
|                  | 1             | 2          | 6          | 4              | 3              | 5              | 7              | 8              | 1          | 2          | 6              | 4              | 3              | 5              | 7                 | 8          | 1          | 2              | 6              | 4              | 3              | 5    | 7     | 8     |
| Accession        |               |            |            |                |                |                |                |                |            |            |                |                |                |                |                   |            |            |                |                |                |                |      |       |       |
| tr F1SSB0 F1SSB0 | 3             | 0          | 1          | 0              | 0              | 0              | 0              | 0              | 5          | 0          | 3              | 0              | 0              | 0              | 0                 | 0          | 4.7%       | 0.0%           | 1.7%           | 0.0%           | 0.0%           | 0.0% | 0.0%  | 0.0%  |
| tr I3LH08 I3LH08 | 2             | 1          | 1          | 0              | 0              | 0              | 0              | 0              | 2          | 3          | 3              | 0              | 0              | 0              | 0                 | 0          | 5.2%       | 1.7%           | 3.2%           | 0.0%           | 0.0%           | 0.0% | 0.0%  | 0.0%  |
| Q02038           | 4             | 1          | 2          | 0              | 0              | 0              | 0              | 0              | 4          | 1          | 3              | 0              | 0              | 0              | 0                 | 0          | 10.1%      | 2.3%           | 2.1%           | 0.0%           | 0.0%           | 0.0% | 0.0%  | 0.0%  |
| tr I3LC77 I3LC77 | 1             | 2          | 1          | 0              | 0              | 0              | 0              | 0              | 1          | 4          | 3              | 0              | 0              | 0              | 0                 | 0          | 4.2%       | 3.8%           | 7.6%           | 0.0%           | 0.0%           | 0.0% | 0.0%  | 0.0%  |
| tr F1S6C1 F1S6C1 | 1             | 2          | 1          | 0              | 0              | 0              | 0              | 0              | 1          | 4          | 3              | 0              | 0              | 0              | 0                 | 0          | 4.4%       | 4.0%           | 7.9%           | 0.0%           | 0.0%           | 0.0% | 0.0%  | 0.0%  |
| tr J9JIN0 J9JIN0 | 4             | 1          | 2          | 0              | 0              | 0              | 0              | 0              | 4          | 1          | 3              | 0              | 0              | 0              | 0                 | 0          | 10.3%      | 2.3%           | 2.2%           | 0.0%           | 0.0%           | 0.0% | 0.0%  | 0.0%  |
| tr K7GM50 K7GM50 | 2             | 0          | 2          | 0              | 0              | 0              | 0              | 0              | 5          | 0          | 4              | 0              | 0              | 0              | 0                 | 0          | 17.4%      | 0.0%           | 18.5%          | 0.0%           | 0.0%           | 0.0% | 0.0%  | 0.0%  |
| tr I3LGB3 I3LGB3 | 3             | 0          | 1          | 0              | 0              | 0              | 0              | 0              | 5          | 0          | 4              | 0              | 0              | 0              | 0                 | 0          | 52.8%      | 0.0%           | 26.4%          | 0.0%           | 0.0%           | 0.0% | 0.0%  | 0.0%  |
| Q7Y599           | 3             | 1          | 1          | 0              | 0              | 0              | 0              | 0              | 4          | 1          | 4              | 0              | 0              | 0              | 0                 | 0          | 7.3%       | 2.3%           | 1.7%           | 0.0%           | 0.0%           | 0.0% | 0.0%  | 0.0%  |
| tr F1S620 F1S620 | 2             | 1          | 1          | 0              | 0              | 0              | 0              | 0              | 3          | 2          | 4              | 0              | 0              | 0              | 0                 | 0          | 2.9%       | 1.2%           | 2.4%           | 0.0%           | 0.0%           | 0.0% | 0.0%  | 0.0%  |
| tr F1RH75 F1RH75 | 4             | 0          | 3          | 0              | 0              | 0              | 0              | 0              | 5          | 0          | 4              | 0              | 0              | 0              | 0                 | 0          | 3.1%       | 0.0%           | 2.6%           | 0.0%           | 0.0%           | 0.0% | 0.0%  | 0.0%  |
| tr F1S286 F1S286 | 4             | 1          | 1          | 0              | 0              | 0              | 0              | 0              | 4          | 1          | 4              | 0              | 0              | 0              | 0                 | 0          | 16.3%      | 5.6%           | 8.4%           | 0.0%           | 0.0%           | 0.0% | 0.0%  | 0.0%  |
| tr F1S619 F1S619 | 2             | 1          | 1          | 0              | 0              | 0              | 0              | 0              | 3          | 2          | 4              | 0              | 0              | 0              | 0                 | 0          | 2.9%       | 1.2%           | 2.3%           | 0.0%           | 0.0%           | 0.0% | 0.0%  | 0.0%  |
| tr K7GQ9 K7GQ9   | 2             | 0          | 2          | 0              | 0              | 0              | 0              | 0              | 5          | 0          | 4              | 0              | 0              | 0              | 0                 | 0          | 20.1%      | 0.0%           | 21.3%          | 0.0%           | 0.0%           | 0.0% | 0.0%  | 0.0%  |
| tr F1S775 F1S775 | 3             | 0          | 1          | 0              | 0              | 0              | 0              | 0              | 5          | 0          | 5              | 0              | 0              | 0              | 0                 | 0          | 7.0%       | 0.0%           | 1.1%           | 0.0%           | 0.0%           | 0.0% | 0.0%  | 0.0%  |
| tr I6L631 I6L631 | 4             | 0          | 2          | 0              | 0              | 0              | 0              | 0              | 5          | 0          | 5              | 0              | 0              | 0              | 0                 | 0          | 29.8%      | 0.0%           | 17.3%          | 0.0%           | 0.0%           | 0.0% | 0.0%  | 0.0%  |
| tr F1SMG6 F1SMG6 | 2             | 1          | 1          | 0              | 0              | 0              | 0              | 0              | 4          | 1          | 5              | 0              | 0              | 0              | 0                 | 0          | 10.8%      | 2.5%           | 4.2%           | 0.0%           | 0.0%           | 0.0% | 0.0%  | 0.0%  |
| tr F1SUB1 F1SUB1 | 5             | 0          | 2          | 0              | 0              | 0              | 0              | 0              | 5          | 0          | 5              | 0              | 0              | 0              | 0                 | 0          | 50.0%      | 0.0%           | 13.5%          | 0.0%           | 0.0%           | 0.0% | 0.0%  | 0.0%  |
| tr F1SU46 F1SU46 | 5             | 0          | 1          | 0              | 0              | 0              | 0              | 0              | 5          | 0          | 5              | 0              | 0              | 0              | 0                 | 0          | 8.7%       | 0.0%           | 3.3%           | 0.0%           | 0.0%           | 0.0% | 0.0%  | 0.0%  |
| tr I3LEX9 I3LEX9 | 3             | 0          | 1          | 0              | 0              | 0              | 0              | 0              | 5          | 0          | 5              | 0              | 0              | 0              | 0                 | 0          | 19.9%      | 0.0%           | 11.2%          | 0.0%           | 0.0%           | 0.0% | 0.0%  | 0.0%  |
| tr K7GN24 K7GN24 | 1             | 0          | 3          | 0              | 0              | 0              | 0              | 0              | 5          | 0          | 6              | 0              | 0              | 0              | 0                 | 0          | 10.0%      | 0.0%           | 7.6%           | 0.0%           | 0.0%           | 0.0% | 0.0%  | 0.0%  |
| tr F2Z5P9 F2Z5P9 | 1             | 1          | 2          | 0              | 0              | 0              | 0              | 0              | 1          | 4          | 6              | 0              | 0              | 0              | 0                 | 0          | 16.7%      | 19.8%          | 16.7%          | 0.0%           | 0.0%           | 0.0% | 0.0%  | 0.0%  |
| tr I3LAK4 I3LAK4 | 2             | 1          | 2          | 0              | 0              | 0              | 0              | 0              | 3          | 2          | 7              | 0              | 0              | 0              | 0                 | 0          | 3.4%       | 2.0%           | 6.5%           | 0.0%           | 0.0%           | 0.0% | 0.0%  | 0.0%  |
| Q35914           | 1             | 0          | 1          | 0              | 0              | 0              | 0              | 0              | 5          | 0          | 7              | 0              | 0              | 0              | 0                 | 0          | 14.9%      | 0.0%           | 11.9%          | 0.0%           | 0.0%           | 0.0% | 0.0%  | 0.0%  |
| tr F1SFG7 F1SFG7 | 4             | 0          | 3          | 0              | 0              | 0              | 0              | 0              | 5          | 0          | 7              | 0              | 0              | 0              | 0                 | 0          | 10.2%      | 0.0%           | 7.0%           | 0.0%           | 0.0%           | 0.0% | 0.0%  | 0.0%  |
| tr F1S0D4 F1S0D4 | 4             | 0          | 2          | 0              | 0              | 0              | 0              | 0              | 5          | 0          | 8              | 0              | 0              | 0              | 0                 | 0          | 5.5%       | 0.0%           | 3.3%           | 0.0%           | 0.0%           | 0.0% | 0.0%  | 0.0%  |
| tr F1RIQ4 F1RIQ4 | 2             | 1          | 3          | 0              | 0              | 0              | 0              | 0              | 2          | 3          | 8              | 0              | 0              | 0              | 0                 | 0          | 13.5%      | 6.8%           | 18.2%          | 0.0%           | 0.0%           | 0.0% | 0.0%  | 0.0%  |
| tr I3LM25 I3LM25 | 2             | 0          | 2          | 0              | 0              | 0              | 0              | 0              | 5          | 0          | 9              | 0              | 0              | 0              | 0                 | 0          | 53.8%      | 0.0%           | 42.9%          | 0.0%           | 0.0%           | 0.0% | 0.0%  | 0.0%  |
| tr F1STR1 F1STR1 | 3             | 1          | 1          | 0              | 0              | 0              | 0              | 0              | 4          | 1          | 9              | 0              | 0              | 0              | 0                 | 0          | 11.4%      | 4.8%           | 3.0%           | 0.0%           | 0.0%           | 0.0% | 0.0%  | 0.0%  |
| tr F1RIE0 F1RIE0 | 1             | 1          | 2          | 0              | 0              | 0              | 0              | 0              | 1          | 4          | 10             | 0              | 0              | 0              | 0                 | 0          | 8.6%       | 6.5%           | 8.6%           | 0.0%           | 0.0%           | 0.0% | 0.0%  | 0.0%  |
| tr I3LM66 I3LM66 | 1             | 1          | 3          | 0              | 0              | 0              | 0              | 0              | 3          | 2          | 11             | 0              | 0              | 0              | 0                 | 0          | 14.5%      | 14.5%          | 51.8%          | 0.0%           | 0.0%           | 0.0% | 0.0%  | 0.0%  |
| tr F1SEN4 F1SEN4 | 4             | 0          | 2          | 0              | 0              | 0              | 0              | 0              | 5          | 0          | 15             | 0              | 0              | 0              | 0                 | 0          | 30.3%      | 0.0%           | 30.3%          | 0.0%           | 0.0%           | 0.0% | 0.0%  | 0.0%  |
| tr F1S7L8 F1S7L8 | 3             | 1          | 5          | 0              | 0              | 0              | 0              | 0              | 4          | 1          | 16             | 0              | 0              | 0              | 0                 | 0          | 9.2%       | 3.0%           | 14.6%          | 0.0%           | 0.0%           | 0.0% | 0.0%  | 0.0%  |
| tr F1S3J0 F1S3J0 | 1             | 2          | 3          | 0              | 0              | 0              | 0              | 0              | 2          | 3          | 17             | 0              | 0              | 0              | 0                 | 0          | 6.7%       | 5.7%           | 7.6%           | 0.0%           | 0.0%           | 0.0% | 0.0%  | 0.0%  |
| tr F1RJM8 F1RJM8 | 4             | 0          | 3          | 0              | 0              | 0              | 0              | 0              | 5          | 0          | 19             | 0              | 0              | 0              | 0                 | 0          | 18.6%      | 0.0%           | 13.5%          | 0.0%           | 0.0%           | 0.0% | 0.0%  | 0.0%  |
| tr I3L679 I3L679 | 1             | 1          | 1          | 0              | 0              | 0              | 0              | 0              | 1          | 4          | 19             | 0              | 0              | 0              | 0                 | 0          | 8.1%       | 11.1%          | 8.1%           | 0.0%           | 0.0%           | 0.0% | 0.0%  | 0.0%  |
| tr F1SKIO F1SKIO | 1             | 1          | 2          | 0              | 0              | 0              | 0              | 0              | 1          | 4          | 20             | 0              | 0              | 0              | 0                 | 0          | 1.2%       | 1.2%           | 3.1%           | 0.0%           | 0.0%           | 0.0% | 0.0%  | 0.0%  |
| tr F1RZ16 F1RZ16 | 4             | 0          | 4          | 0              | 0              | 0              | 0              | 0              | 5          | 0          | 22             | 0              | 0              | 0              | 0                 | 0          | 31.4%      | 0.0%           | 24.5%          | 0.0%           | 0.0%           | 0.0% | 0.0%  | 0.0%  |
| tr F1REW5 F1REW5 | 3             | 1          | 4          | 0              | 0              | 0              | 0              | 0              | 4          | 1          | 26             | 0              | 0              | 0              | 0                 | 0          | 4.4%       | 0.9%           | 6.3%           | 0.0%           | 0.0%           | 0.0% | 0.0%  | 0.0%  |
| tr I3LRK1 I3LRK1 | 5             | 0          | 5          | 0              | 0              | 0              | 0              | 0              | 5          | 0          | 30             | 0              | 0              | 0              | 0                 | 0          | 16.4%      | 0.0%           | 13.8%          | 0.0%           | 0.0%           | 0.0% | 0.0%  | 0.0%  |
| tr F1SGX4 F1SGX4 | 1             | 1          | 1          | 0              | 0              | 0              | 0              | 0              | 2          | 3          | 136            | 0              | 0              | 0              | 0                 | 0          | 6.1%       | 6.1%           | 6.1%           | 0.0%           | 0.0%           | 0.0% | 0.0%  | 0.0%  |
| tr I3LSA3 I3LSA3 | 3             | 0          | 0          | 0              | 0              | 0              | 5              | 6              | 4          | 0          | 0              | 0              | 0              | 0              | 20                | 58         | 12.6%      | 0.0%           | 0.0%           | 0.0%           | 0.0%           | 0.0% | 12.8% | 21.9% |
| tr F1RI88 F1RI88 | 2             | 1          | 0          | 0              | 0              | 0              | 3              | 3              | 2          | 2          | 0              | 0              | 0              | 0              | 12                | 33         | 8.3%       | 3.1%           | 0.0%           | 0.0%           | 0.0%           | 0.0% | 14.9% | 15.2% |
| tr I3LRX8 I3LRX8 | 3             | 0          | 2          | 0              | 0              | 0              | 0              | 5              | 4          | 0          | 3              | 0              | 0              | 0              | 0                 | 73         | 14.7%      | 0.0%           | 7.6%           | 0.0%           | 0.0%           | 0.0% | 0.0%  | 12.7% |
| tr F2Z5M5 F2Z5M5 | 2             | 0          | 1          | 0              | 0              | 2              | 2              | 7              | 4          | 0          | 1              | 0              | 0              | 0              | 10                | 38         | 8.1%       | 0.0%           | 9.6%           | 0.0%           | 0.0%           | 0.0% | 19.3% | 34.5% |
| tr F1SRY1 F1SRY1 | 4             | 0          | 1          | 0              | 0              | 0              | 0              | 6              | 4          | 0          | 2              | 0              | 0              | 0              | 6                 | 29         | 6.4%       | 0.0%           | 2.8%           | 0.0%           | 0.0%           | 0.0% | 1.8%  | 12.0% |
| tr I3LEV4 I3LEV4 | 1             | 3          | 0          | 0              | 0              | 0              | 0              | 3              | 1          | 3          | 0              | 0              | 0              | 0              | 0                 | 23         | 2.1%       | 9.0%           | 0.0%           | 0.0%           | 0.0%           | 0.0% | 0.0%  | 8.5%  |
| tr F1S336 F1S336 | 2             | 1          | 0          | 0              | 0              | 0              | 1              | 5              | 2          | 2          | 0              | 0              | 0              | 0              | 3                 | 20         | 8.6%       | 3.1%           | 0.0%           | 0.0%           | 0.0%           | 0.0% | 3.1%  | 14.5% |
| tr F1RTW7 F1RTW7 | 3             | 0          | 0          | 0              | 0              | 0              | 0              | 5              | 4          | 0          | 0              | 0              | 0              | 0              | 0                 | 19         | 19.0%      | 0.0%           | 0.0%           | 0.0%           | 0.0%           | 0.0% | 0.0%  | 13.8% |
| tr I3L5C4 I3L5C4 | 2             | 1          | 1          | 0              | 0              | 0              | 0              | 1              | 3          | 1          | 2              | 0              | 0              | 0              | 6                 | 15         | 1.7%       | 1.7%           | 1.3%           | 0.0%           | 0.0%           | 0.0% | 1.7%  | 1.7%  |
| tr I3LG18 I3LG18 | 3             | 0          | 0          | 0              | 0              | 0              | 1              | 2              | 4          | 0          | 0              | 0              | 0              | 0              | 11                | 3          | 2.8%       | 0.0%           | 0.0%           | 0.0%           | 0.0%           | 0.0% | 1.3%  | 3.1%  |
| tr F1RQB2 F1RQB2 | 2             | 0          | 0          | 0              | 0              | 0              | 1              | 6              | 4          | 0          | 0              | 0              | 0              | 0              | 1                 | 12         | 0.4%       | 0.0%           | 0.0%           | 0.0%           | 0.0%           | 0.0% | 0.7%  | 3.7%  |
| tr I3LMS7 I3LMS7 | 1             | 1          | 0          | 0              | 0              | 0              | 0              | 2              | 2          | 0          | 0              | 0              | 0              | 0              | 0                 | 12         | 3.0%       | 3.0%           | 0.0%           | 0.0%           | 0.0%           | 0.0% | 0.0%  | 3.0%  |
| tr F2Z503 F2Z503 | 3             | 0          | 0          | 0              | 0              | 0              | 1              | 2              | 4          | 0          | 0              | 0              | 0              | 0              | 4                 | 7          | 39.5%      | 0.0%           | 0.0%           | 0.0%           | 0.0%           | 0.0% | 24.2% | 39.5% |
| tr I3LB00 I3LB00 | 1             | 1          | 1          | 0              | 0              | 0              | 1              | 1              | 1          | 3          | 3              | 0              | 0              | 0              | 13                | 5          | 4.2%       | 4.2%           | 4.2%           | 0.0%           | 0.0%           | 0.0% | 4.2%  | 4.2%  |
| tr F1SRL9 F1SRL9 | 3             | 0          | 25         | 0              | 0              | 0              | 5              | 10             | 4          | 0          | 115            | 0              | 0              | 0              | 133               | 154        | 9.6%       | 0.0%           | 91.2%          | 0.0%           | 0.0%           | 0.0% | 56.6% | 66.7% |
| P61220           | 2             | 1          | 2          | 0              | 0              | 0              | 1              | 1              | 3          | 1          | 6              | 0              | 0              | 0              | 17                | 7          | 16.8%      | 16.8%          | 35.4%          | 0.0%           | 0.0%           | 0.0% | 21.2% | 21.2% |
| tr I3LQ54 I3LQ54 | 3             | 0          | 0          | 0              | 0              | 0              | 1              | 1              | 4          | 0          | 0              | 0              | 0              | 0              | 2                 | 7          | 21.1%      | 0.0%           | 0.0%           | 0.0%           | 0.0%           | 0.0% | 14.1% | 14.1% |
| tr I3LSH8 I3LSH8 | 1             | 0          | 2          | 0              | 0              | 0              | 3              | 6              | 4          | 0          | 16             | 0              | 0              | 0              | 6                 | 37         | 3.2%       | 0.0%           | 4.8%           | 0.0%           | 0.0%           | 0.0% | 11.8% | 19.5% |
| tr F1SIC5 F1SIC5 | 1             | 0          | 2          | 0              | 0              | 0              | 3              | 6              | 4          | 0          | 16             | 0              | 0              | 0              | 6                 | 37         | 3.3%       | 0.0%           | 4.9%           | 0.0%           | 0.0%           | 0.0% | 12.0% | 19.8% |
| tr F1S415 F1S415 | 3             | 0          | 1          | 0              | 0              | 0              | 1              | 2              | 4          | 0          | 9              | 0              | 0              | 0              | 11                | 11         | 6.8%       | 0.0%           | 3.1%           | 0.0%           | 0.0%           | 0.0% | 5.4%  | 9.4%  |
| tr I3L8F2 I3L8F2 | 3             | 0          | 0          | 0              | 0              | 0              | 1              | 1              | 4          | 0          | 0              | 0              | 0              | 0              | 3                 | 3          | 11.0%      | 0.0%           | 0.0%           | 0.0%           | 0.0%           | 0.0% | 2.7%  | 7.7%  |
| tr K7GMF6 K7GMF6 | 3             | 1          | 0          | 0              | 0              | 0              | 0              | 1              | 3          | 1          | 0              | 0              | 0              | 0              | 1                 | 5          | 5.5%       | 2.4%           | 0.0%           | 0.0%           | 0.0%           | 0.0% | 2.4%  | 5.9%  |
| tr               |               |            |            |                |                |                |                |                |            |            |                |                |                |                |                   |            |            |                |                |                |                |      |       |       |

|                          | Peptide Count |            |            |                |                |                |                | Spectral Count |            |            |            |                |                |                | Sequence Coverage |                |            |            |            |                |                |                |                |                |
|--------------------------|---------------|------------|------------|----------------|----------------|----------------|----------------|----------------|------------|------------|------------|----------------|----------------|----------------|-------------------|----------------|------------|------------|------------|----------------|----------------|----------------|----------------|----------------|
|                          | Whole Cell    | Whole Cell | Whole Cell | Cilia Fraction | Whole Cell | Whole Cell | Whole Cell | Cilia Fraction | Cilia Fraction | Cilia Fraction | Cilia Fraction    | Cilia Fraction | Whole Cell | Whole Cell | Whole Cell | Cilia Fraction |
| Sample#                  | 1             | 2          | 6          | 4              | 3              | 5              | 7              | 8              | 1          | 2          | 6          | 4              | 3              | 5              | 7                 | 8              | 1          | 2          | 6          | 4              | 3              | 5              | 7              | 8              |
| Accession                |               |            |            |                |                |                |                |                |            |            |            |                |                |                |                   |                |            |            |            |                |                |                |                |                |
| tr I3LH70 I3LH70         | 2             | 0          | 1          | 0              | 0              | 0              | 0              | 1              | 4          | 0          | 1          | 0              | 0              | 0              | 0                 | 3              | 4.0%       | 0.0%       | 6.4%       | 0.0%           | 0.0%           | 0.0%           | 0.0%           | 9.7%           |
| tr F1S100 F1S100         | 3             | 0          | 1          | 0              | 0              | 0              | 0              | 1              | 4          | 0          | 1          | 0              | 0              | 0              | 0                 | 3              | 13.8%      | 0.0%       | 3.6%       | 0.0%           | 0.0%           | 0.0%           | 0.0%           | 7.8%           |
| tr F1SQG6 F1SQG6         | 2             | 0          | 1          | 0              | 0              | 0              | 0              | 1              | 4          | 0          | 3          | 0              | 0              | 0              | 0                 | 4              | 9.6%       | 0.0%       | 5.9%       | 0.0%           | 0.0%           | 0.0%           | 0.0%           | 5.9%           |
| A5GFN6                   | 3             | 1          | 4          | 0              | 0              | 0              | 0              | 1              | 3          | 1          | 12         | 0              | 0              | 0              | 0                 | 9              | 17.9%      | 4.6%       | 10.9%      | 0.0%           | 0.0%           | 0.0%           | 0.0%           | 5.4%           |
| tr F1SFD6 F1SFD6         | 2             | 0          | 3          | 0              | 0              | 0              | 0              | 1              | 4          | 0          | 8          | 0              | 0              | 0              | 0                 | 6              | 24.1%      | 0.0%       | 18.4%      | 0.0%           | 0.0%           | 0.0%           | 0.0%           | 16.3%          |
| tr K7GLG5 K7GLG5         | 1             | 1          | 0          | 0              | 0              | 0              | 0              | 1              | 2          | 2          | 0          | 0              | 0              | 0              | 0                 | 2              | 5.0%       | 6.1%       | 0.0%       | 0.0%           | 0.0%           | 0.0%           | 0.0%           | 5.0%           |
| tr K7GLD3 K7GLD3         | 1             | 1          | 0          | 0              | 0              | 0              | 0              | 1              | 2          | 2          | 0          | 0              | 0              | 0              | 0                 | 2              | 3.8%       | 4.6%       | 0.0%       | 0.0%           | 0.0%           | 0.0%           | 0.0%           | 3.8%           |
| I3LUP1                   | 3             | 0          | 0          | 0              | 0              | 0              | 1              | 0              | 4          | 0          | 0          | 0              | 0              | 0              | 0                 | 2              | 7.4%       | 0.0%       | 0.0%       | 0.0%           | 0.0%           | 0.0%           | 5.7%           | 0.0%           |
| tr K7GLR6 K7GLR6         | 1             | 1          | 0          | 0              | 0              | 0              | 0              | 1              | 2          | 2          | 0          | 0              | 0              | 0              | 0                 | 2              | 3.4%       | 4.2%       | 0.0%       | 0.0%           | 0.0%           | 0.0%           | 0.0%           | 3.4%           |
| tr F1S268 F1S268         | 2             | 0          | 0          | 0              | 0              | 0              | 0              | 1              | 4          | 0          | 0          | 0              | 0              | 0              | 0                 | 2              | 7.7%       | 0.0%       | 0.0%       | 0.0%           | 0.0%           | 0.0%           | 0.0%           | 9.5%           |
| tr F1SPN1 F1SPN1         | 3             | 1          | 3          | 0              | 0              | 0              | 0              | 1              | 3          | 1          | 31         | 0              | 0              | 0              | 0                 | 15             | 17.9%      | 5.5%       | 17.9%      | 0.0%           | 0.0%           | 0.0%           | 0.0%           | 9.0%           |
| tr F1RW31 F1RW31         | 4             | 0          | 1          | 0              | 0              | 0              | 0              | 1              | 4          | 0          | 1          | 0              | 0              | 0              | 0                 | 2              | 9.7%       | 0.0%       | 2.9%       | 0.0%           | 0.0%           | 0.0%           | 0.0%           | 3.7%           |
| tr I3LPR8 I3LPR8         | 1             | 1          | 4          | 0              | 0              | 0              | 0              | 1              | 3          | 1          | 21         | 0              | 0              | 0              | 0                 | 8              | 17.5%      | 17.5%      | 17.5%      | 0.0%           | 0.0%           | 0.0%           | 0.0%           | 17.5%          |
| P07802                   | 2             | 0          | 3          | 0              | 0              | 0              | 0              | 2              | 4          | 0          | 8          | 0              | 0              | 0              | 0                 | 3              | 4.7%       | 0.0%       | 11.1%      | 0.0%           | 0.0%           | 0.0%           | 0.0%           | 6.8%           |
| tr F1RV23 F1RV23         | 2             | 0          | 3          | 0              | 0              | 0              | 0              | 2              | 4          | 0          | 8          | 0              | 0              | 0              | 0                 | 3              | 4.7%       | 0.0%       | 11.1%      | 0.0%           | 0.0%           | 0.0%           | 0.0%           | 6.8%           |
| tr F1S8T4 F1S8T4         | 0             | 1          | 0          | 0              | 0              | 0              | 0              | 1              | 0          | 4          | 0          | 0              | 0              | 0              | 0                 | 1              | 0.0%       | 1.9%       | 0.0%       | 0.0%           | 0.0%           | 0.0%           | 0.0%           | 2.0%           |
| tr F1SG40 F1SG40         | 4             | 0          | 0          | 0              | 0              | 0              | 0              | 1              | 4          | 0          | 0          | 0              | 0              | 0              | 0                 | 1              | 5.5%       | 0.0%       | 0.0%       | 0.0%           | 0.0%           | 0.0%           | 0.0%           | 2.8%           |
| Q29594                   | 1             | 1          | 0          | 0              | 0              | 0              | 0              | 1              | 2          | 2          | 0          | 0              | 0              | 0              | 0                 | 1              | 15.7%      | 15.7%      | 0.0%       | 0.0%           | 0.0%           | 0.0%           | 0.0%           | 15.7%          |
| tr F1RR62 F1RR62         | 3             | 0          | 0          | 0              | 0              | 0              | 0              | 1              | 4          | 0          | 0          | 0              | 0              | 0              | 0                 | 1              | 12.3%      | 0.0%       | 0.0%       | 0.0%           | 0.0%           | 0.0%           | 0.0%           | 5.0%           |
| tr F1RK77 F1RK77         | 2             | 1          | 0          | 0              | 0              | 0              | 0              | 1              | 3          | 1          | 0          | 0              | 0              | 0              | 0                 | 1              | 10.5%      | 4.5%       | 0.0%       | 0.0%           | 0.0%           | 0.0%           | 0.0%           | 9.8%           |
| tr I3LLS0 I3LLS0         | 4             | 0          | 2          | 0              | 0              | 0              | 0              | 1              | 4          | 0          | 5          | 0              | 0              | 0              | 0                 | 2              | 21.7%      | 0.0%       | 10.4%      | 0.0%           | 0.0%           | 0.0%           | 0.0%           | 6.8%           |
| tr F1S3E3 F1S3E3         | 3             | 0          | 1          | 0              | 0              | 0              | 0              | 1              | 4          | 0          | 6          | 0              | 0              | 0              | 0                 | 2              | 28.8%      | 0.0%       | 12.4%      | 0.0%           | 0.0%           | 0.0%           | 0.0%           | 12.4%          |
| tr D4P3C2 D4P3C2         | 3             | 0          | 2          | 0              | 0              | 0              | 0              | 2              | 4          | 0          | 7          | 0              | 0              | 0              | 0                 | 2              | 7.7%       | 0.0%       | 5.4%       | 0.0%           | 0.0%           | 0.0%           | 0.0%           | 5.0%           |
| tr I3LFR2 I3LFR2         | 3             | 0          | 1          | 0              | 0              | 0              | 0              | 1              | 4          | 0          | 3          | 0              | 0              | 0              | 0                 | 1              | 4.1%       | 0.0%       | 1.8%       | 0.0%           | 0.0%           | 0.0%           | 0.0%           | 2.8%           |
| tr I3L7W1 I3L7W1         | 3             | 0          | 4          | 0              | 0              | 0              | 0              | 2              | 4          | 0          | 11         | 0              | 0              | 0              | 0                 | 2              | 29.8%      | 0.0%       | 15.6%      | 0.0%           | 0.0%           | 0.0%           | 0.0%           | 14.2%          |
| tr I3LDE1 I3LDE1         | 3             | 0          | 2          | 0              | 0              | 0              | 0              | 1              | 4          | 0          | 12         | 0              | 0              | 0              | 0                 | 2              | 54.0%      | 0.0%       | 17.5%      | 0.0%           | 0.0%           | 0.0%           | 0.0%           | 21.2%          |
| tr F1RNW4 F1RNW4         | 2             | 0          | 1          | 0              | 0              | 0              | 0              | 1              | 4          | 0          | 4          | 0              | 0              | 0              | 0                 | 1              | 16.3%      | 0.0%       | 3.1%       | 0.0%           | 0.0%           | 0.0%           | 0.0%           | 7.8%           |
| tr F1S8T2 F1S8T2         | 2             | 0          | 2          | 0              | 0              | 0              | 0              | 1              | 4          | 0          | 17         | 0              | 0              | 0              | 0                 | 2              | 9.5%       | 0.0%       | 12.5%      | 0.0%           | 0.0%           | 0.0%           | 0.0%           | 12.5%          |
| tr F1SU34 F1SU34         | 4             | 0          | 3          | 0              | 0              | 0              | 0              | 1              | 4          | 0          | 18         | 0              | 0              | 0              | 0                 | 2              | 17.5%      | 0.0%       | 11.5%      | 0.0%           | 0.0%           | 0.0%           | 0.0%           | 5.5%           |
| tr F1SMQ4 F1SMQ4         | 2             | 2          | 2          | 0              | 0              | 0              | 0              | 1              | 2          | 2          | 7          | 0              | 0              | 0              | 0                 | 1              | 2.5%       | 4.2%       | 4.2%       | 0.0%           | 0.0%           | 0.0%           | 0.0%           | 2.3%           |
| tr I3LCJ2 I3LCJ2         | 3             | 0          | 2          | 0              | 0              | 0              | 0              | 1              | 4          | 0          | 25         | 0              | 0              | 0              | 1                 | 1              | 6.4%       | 0.0%       | 4.2%       | 0.0%           | 0.0%           | 0.0%           | 4.7%           | 4.7%           |
| tr F1SFU0 F1SFU0         | 3             | 0          | 2          | 0              | 0              | 0              | 1              | 1              | 4          | 0          | 25         | 0              | 0              | 0              | 1                 | 1              | 6.3%       | 0.0%       | 4.1%       | 0.0%           | 0.0%           | 0.0%           | 4.7%           | 4.7%           |
| tr I3LCX3 I3LCX3         | 1             | 1          | 1          | 0              | 0              | 0              | 0              | 1              | 3          | 1          | 25         | 0              | 0              | 0              | 0                 | 2              | 6.5%       | 6.5%       | 9.7%       | 0.0%           | 0.0%           | 0.0%           | 0.0%           | 7.0%           |
| tr Q06AA0 Q06AA0         | 2             | 1          | 3          | 0              | 0              | 0              | 1              | 0              | 3          | 1          | 17         | 0              | 0              | 0              | 1                 | 0              | 6.7%       | 2.6%       | 10.1%      | 0.0%           | 0.0%           | 0.0%           | 4.1%           | 0.0%           |
| tr I3LV99 I3LV99         | 2             | 2          | 4          | 0              | 0              | 0              | 0              | 1              | 2          | 2          | 25         | 0              | 0              | 0              | 0                 | 1              | 1.7%       | 1.4%       | 3.3%       | 0.0%           | 0.0%           | 0.0%           | 0.0%           | 0.8%           |
| tr I3LIE3 I3LIE3         | 2             | 2          | 4          | 0              | 0              | 0              | 0              | 1              | 2          | 2          | 25         | 0              | 0              | 0              | 0                 | 1              | 1.7%       | 1.4%       | 3.3%       | 0.0%           | 0.0%           | 0.0%           | 0.0%           | 0.8%           |
| tr K7GQ92 K7GQ92         | 3             | 1          | 2          | 0              | 0              | 0              | 0              | 2              | 3          | 1          | 206        | 0              | 0              | 0              | 0                 | 7              | 20.3%      | 7.4%       | 12.8%      | 0.0%           | 0.0%           | 0.0%           | 0.0%           | 12.8%          |
| tr I3LCY3 I3LCY3         | 2             | 1          | 0          | 0              | 0              | 0              | 0              | 0              | 3          | 1          | 0          | 0              | 0              | 0              | 0                 | 0              | 3.7%       | 1.0%       | 0.0%       | 0.0%           | 0.0%           | 0.0%           | 0.0%           | 0.0%           |
| tr B3VQ66 B3VQ66         | 0             | 1          | 0          | 0              | 0              | 0              | 0              | 0              | 0          | 4          | 0          | 0              | 0              | 0              | 0                 | 0              | 0.0%       | 1.7%       | 0.0%       | 0.0%           | 0.0%           | 0.0%           | 0.0%           | 0.0%           |
| tr I3LBR7 I3LBR7         | 2             | 2          | 0          | 0              | 0              | 0              | 0              | 0              | 2          | 2          | 0          | 0              | 0              | 0              | 0                 | 0              | 2.0%       | 1.8%       | 0.0%       | 0.0%           | 0.0%           | 0.0%           | 0.0%           | 0.0%           |
| tr F1S8U4 F1S8U4         | 1             | 1          | 0          | 0              | 0              | 0              | 0              | 0              | 3          | 1          | 0          | 0              | 0              | 0              | 0                 | 0              | 7.5%       | 7.5%       | 0.0%       | 0.0%           | 0.0%           | 0.0%           | 0.0%           | 0.0%           |
| tr I3LU13 I3LU13         | 3             | 0          | 0          | 0              | 0              | 0              | 0              | 0              | 4          | 0          | 0          | 0              | 0              | 0              | 0                 | 0              | 13.9%      | 0.0%       | 0.0%       | 0.0%           | 0.0%           | 0.0%           | 0.0%           | 0.0%           |
| tr I3LUB3 I3LUB3         | 2             | 1          | 0          | 0              | 0              | 0              | 0              | 0              | 3          | 1          | 0          | 0              | 0              | 0              | 0                 | 0              | 6.8%       | 6.1%       | 0.0%       | 0.0%           | 0.0%           | 0.0%           | 0.0%           | 0.0%           |
| tr F1S475 F1S475         | 3             | 0          | 0          | 0              | 0              | 0              | 0              | 0              | 4          | 0          | 0          | 0              | 0              | 0              | 0                 | 0              | 3.9%       | 0.0%       | 0.0%       | 0.0%           | 0.0%           | 0.0%           | 0.0%           | 0.0%           |
| Reverse_tr K7GL83 K7GL83 | 0             | 1          | 0          | 0              | 0              | 0              | 0              | 0              | 0          | 4          | 0          | 0              | 0              | 0              | 0                 | 0              | 0.0%       | 1.0%       | 0.0%       | 0.0%           | 0.0%           | 0.0%           | 0.0%           | 0.0%           |
| tr F1SG35 F1SG35         | 0             | 1          | 0          | 0              | 0              | 0              | 0              | 0              | 0          | 4          | 0          | 0              | 0              | 0              | 0                 | 0              | 0.0%       | 3.2%       | 0.0%       | 0.0%           | 0.0%           | 0.0%           | 0.0%           | 0.0%           |
| tr I3LUJ0 I3LUJ0         | 2             | 0          | 0          | 0              | 0              | 0              | 0              | 0              | 4          | 0          | 0          | 0              | 0              | 0              | 0                 | 0              | 9.1%       | 0.0%       | 0.0%       | 0.0%           | 0.0%           | 0.0%           | 0.0%           | 0.0%           |
| tr F1SMT1 F1SMT1         | 1             | 1          | 0          | 0              | 0              | 0              | 0              | 0              | 1          | 3          | 0          | 0              | 0              | 0              | 0                 | 0              | 8.6%       | 6.9%       | 0.0%       | 0.0%           | 0.0%           | 0.0%           | 0.0%           | 0.0%           |
| tr I3LFU2 I3LFU2         | 0             | 1          | 0          | 0              | 0              | 0              | 0              | 0              | 0          | 4          | 0          | 0              | 0              | 0              | 0                 | 0              | 0.0%       | 1.7%       | 0.0%       | 0.0%           | 0.0%           | 0.0%           | 0.0%           | 0.0%           |
| tr K7GSL9 K7GSL9         | 2             | 1          | 0          | 0              | 0              | 0              | 0              | 0              | 3          | 1          | 0          | 0              | 0              | 0              | 0                 | 0              | 19.2%      | 10.2%      | 0.0%       | 0.0%           | 0.0%           | 0.0%           | 0.0%           | 0.0%           |
| tr I3LA10 I3LA10         | 2             | 1          | 0          | 0              | 0              | 0              | 0              | 0              | 2          | 2          | 0          | 0              | 0              | 0              | 0                 | 0              | 14.2%      | 3.4%       | 0.0%       | 0.0%           | 0.0%           | 0.0%           | 0.0%           | 0.0%           |
| tr K7GPY4 K7GPY4         | 2             | 2          | 0          | 0              | 0              | 0              | 0              | 0              | 2          | 2          | 0          | 0              | 0              | 0              | 0                 | 0              | 4.9%       | 2.7%       | 0.0%       | 0.0%           | 0.0%           | 0.0%           | 0.0%           | 0.0%           |
| tr F1S0W4 F1S0W4         | 2             | 1          | 0          | 0              | 0              | 0              | 0              | 0              | 3          | 1          | 0          | 0              | 0              | 0              | 0                 | 0              | 0.9%       | 0.5%       | 0.0%       | 0.0%           | 0.0%           | 0.0%           | 0.0%           | 0.0%           |
| tr I3L678 I3L678         | 1             | 1          | 0          | 0              | 0              | 0              | 0              | 0              | 2          | 2          | 0          | 0              | 0              | 0              | 0                 | 0              | 1.6%       | 0.8%       | 0.0%       | 0.0%           | 0.0%           | 0.0%           | 0.0%           | 0.0%           |
| tr F1SJP6 F1SJP6         | 2             | 0          | 0          | 0              | 0              | 0              | 0              | 0              | 4          | 0          | 0          | 0              | 0              | 0              | 0                 | 0              | 12.3%      | 0.0%       | 0.0%       | 0.0%           | 0.0%           | 0.0%           | 0.0%           | 0.0%           |
| tr I3LMK7 I3LMK7         | 0             | 3          | 0          | 0              | 0              | 0              | 0              | 0              | 0          | 4          | 0          | 0              | 0              | 0              | 0                 | 0              | 0.0%       | 2.6%       | 0.0%       | 0.0%           | 0.0%           | 0.0%           | 0.0%           | 0.0%           |
| tr Q2XQ99 Q2XQ99         | 3             | 1          | 0          | 0              | 0              | 0              | 0              | 0              | 3          | 1          | 0          | 0              | 0              | 0              | 0                 | 0              | 6.3%       | 1.9%       | 0.0%       | 0.0%           | 0.0%           | 0.0%           | 0.0%           | 0.0%           |
| tr F1RU48 F1RU48         | 0             | 1          | 0          | 0              | 0              | 0              | 0              | 0              | 0          | 4          | 0          | 0              | 0              | 0              | 0                 | 0              | 0.0%       | 3.5%       | 0.0%       | 0.0%           | 0.0%           | 0.0%           | 0.0%           | 0.0%           |
| tr F1SHR6 F1SHR6         | 2             | 0          | 0          | 0              | 0              | 0              | 0              | 0              | 4          | 0          | 0          | 0              | 0              | 0              | 0                 | 0              | 10.6%      | 0.0%       | 0.0%       | 0.0%           | 0.0%           | 0.0%           | 0.0%           | 0.0%           |
| tr F1S324 F1S324         | 0             | 2          | 0          | 0              | 0              | 0              | 0              | 0              | 0          | 4          | 0          | 0              | 0              | 0              | 0                 | 0              | 0.0%       | 0.7%       | 0.0%       | 0.0%           | 0.0%           | 0.0%           | 0.0%           | 0.0%           |
| tr F1RVK1 F1RVK1         | 3             | 0          | 0          | 0              | 0              | 0              | 0              | 0              | 4          | 0          | 0          | 0              | 0              | 0              | 0                 | 0              | 7.0%       | 0.0%       | 0.0%       | 0.0%           | 0.0%           | 0.0%           | 0.0%           | 0.0%           |
| tr F1RU54 F1RU54         | 1             | 1          | 0          | 0              | 0              | 0              | 0              | 0              | 1          | 3          | 0          | 0              | 0              | 0              | 0                 | 0              | 6.8%       | 6.2%       | 0.0%       | 0.0%           | 0.0%           | 0.0%           | 0.0%           | 0.0%           |
| tr I3LU29 I3LU29         | 4             | 0          | 0          | 0              | 0              | 0              | 0              | 0              | 4          | 0          | 0          | 0              | 0              | 0              | 0                 | 0              | 12.8%      | 0.0%       | 0.0%       | 0.0%           | 0.0%           | 0.0%           | 0.0%           | 0.0%           |
| tr F1RSF6 F1RSF6         | 2             | 1          | 0</        |                |                |                |                |                |            |            |            |                |                |                |                   |                |            |            |            |                |                |                |                |                |

| Accession                | Sample# | Peptide Count |            |            |                |                |                |                | Spectral Count |            |            |                |                |                |                | Sequence Coverage |            |            |                |                |                |                |      |
|--------------------------|---------|---------------|------------|------------|----------------|----------------|----------------|----------------|----------------|------------|------------|----------------|----------------|----------------|----------------|-------------------|------------|------------|----------------|----------------|----------------|----------------|------|
|                          |         | Whole Cell    | Whole Cell | Whole Cell | Cilia Fraction | Cilia Fraction | Cilia Fraction | Cilia Fraction | Whole Cell     | Whole Cell | Whole Cell | Cilia Fraction | Cilia Fraction | Cilia Fraction | Cilia Fraction | Whole Cell        | Whole Cell | Whole Cell | Cilia Fraction | Cilia Fraction | Cilia Fraction | Cilia Fraction |      |
|                          |         | 1             | 2          | 6          | 4              | 3              | 5              | 7              | 1              | 2          | 6          | 4              | 3              | 5              | 7              | 1                 | 2          | 6          | 4              | 3              | 5              | 7              | 8    |
| tr I3L6C0 I3L6C0         |         | 2             | 1          | 0          | 0              | 0              | 0              | 0              | 2              | 2          | 0          | 0              | 0              | 0              | 0              | 8.5%              | 2.5%       | 0.0%       | 0.0%           | 0.0%           | 0.0%           | 0.0%           | 0.0% |
| tr I3LT12 I3LT12         |         | 4             | 0          | 0          | 0              | 0              | 0              | 0              | 4              | 0          | 0          | 0              | 0              | 0              | 0              | 10.7%             | 0.0%       | 0.0%       | 0.0%           | 0.0%           | 0.0%           | 0.0%           | 0.0% |
| tr I3LJ62 I3LJ62         |         | 2             | 1          | 0          | 0              | 0              | 0              | 0              | 3              | 1          | 0          | 0              | 0              | 0              | 0              | 16.9%             | 4.4%       | 0.0%       | 0.0%           | 0.0%           | 0.0%           | 0.0%           | 0.0% |
| tr F1SB47 F1SB47         |         | 1             | 2          | 0          | 0              | 0              | 0              | 0              | 1              | 3          | 0          | 0              | 0              | 0              | 0              | 5.8%              | 5.8%       | 0.0%       | 0.0%           | 0.0%           | 0.0%           | 0.0%           | 0.0% |
| tr F1S6Y8 F1S6Y8         |         | 1             | 1          | 0          | 0              | 0              | 0              | 0              | 2              | 2          | 0          | 0              | 0              | 0              | 0              | 1.6%              | 0.8%       | 0.0%       | 0.0%           | 0.0%           | 0.0%           | 0.0%           | 0.0% |
| P79307                   |         | 3             | 1          | 0          | 0              | 0              | 0              | 0              | 3              | 1          | 0          | 0              | 0              | 0              | 0              | 6.1%              | 1.8%       | 0.0%       | 0.0%           | 0.0%           | 0.0%           | 0.0%           | 0.0% |
| tr F1RUT9 F1RUT9         |         | 1             | 2          | 0          | 0              | 0              | 0              | 0              | 1              | 3          | 0          | 0              | 0              | 0              | 0              | 1.5%              | 1.9%       | 0.0%       | 0.0%           | 0.0%           | 0.0%           | 0.0%           | 0.0% |
| tr F1S563 F1S563         |         | 2             | 1          | 0          | 0              | 0              | 0              | 0              | 2              | 2          | 0          | 0              | 0              | 0              | 0              | 4.4%              | 1.9%       | 0.0%       | 0.0%           | 0.0%           | 0.0%           | 0.0%           | 0.0% |
| tr I3LPU5 I3LPU5         |         | 0             | 1          | 0          | 0              | 0              | 0              | 0              | 0              | 4          | 0          | 0              | 0              | 0              | 0              | 0.0%              | 19.1%      | 0.0%       | 0.0%           | 0.0%           | 0.0%           | 0.0%           | 0.0% |
| tr F1RTU6 F1RTU6         |         | 1             | 1          | 0          | 0              | 0              | 0              | 0              | 3              | 1          | 0          | 0              | 0              | 0              | 0              | 15.7%             | 15.7%      | 0.0%       | 0.0%           | 0.0%           | 0.0%           | 0.0%           | 0.0% |
| tr J9JIM8 J9JIM8         |         | 2             | 2          | 0          | 0              | 0              | 0              | 0              | 2              | 2          | 0          | 0              | 0              | 0              | 0              | 4.9%              | 2.6%       | 0.0%       | 0.0%           | 0.0%           | 0.0%           | 0.0%           | 0.0% |
| tr Q2XQA0 Q2XQA0         |         | 3             | 1          | 0          | 0              | 0              | 0              | 0              | 3              | 1          | 0          | 0              | 0              | 0              | 0              | 6.8%              | 2.0%       | 0.0%       | 0.0%           | 0.0%           | 0.0%           | 0.0%           | 0.0% |
| tr I3LPQ4 I3LPQ4         |         | 0             | 1          | 0          | 0              | 0              | 0              | 0              | 0              | 4          | 0          | 0              | 0              | 0              | 0              | 0.0%              | 4.9%       | 0.0%       | 0.0%           | 0.0%           | 0.0%           | 0.0%           | 0.0% |
| tr F1S554 F1S554         |         | 3             | 0          | 0          | 0              | 0              | 0              | 0              | 4              | 0          | 0          | 0              | 0              | 0              | 0              | 5.1%              | 0.0%       | 0.0%       | 0.0%           | 0.0%           | 0.0%           | 0.0%           | 0.0% |
| tr F1RV94 F1RV94         |         | 2             | 1          | 0          | 0              | 0              | 0              | 0              | 2              | 2          | 0          | 0              | 0              | 0              | 0              | 40.4%             | 14.9%      | 0.0%       | 0.0%           | 0.0%           | 0.0%           | 0.0%           | 0.0% |
| tr I3LGX5 I3LGX5         |         | 2             | 1          | 0          | 0              | 0              | 0              | 0              | 3              | 1          | 0          | 0              | 0              | 0              | 0              | 8.4%              | 3.2%       | 0.0%       | 0.0%           | 0.0%           | 0.0%           | 0.0%           | 0.0% |
| tr F1RFR4 F1RFR4         |         | 3             | 0          | 0          | 0              | 0              | 0              | 0              | 4              | 0          | 0          | 0              | 0              | 0              | 0              | 11.6%             | 0.0%       | 0.0%       | 0.0%           | 0.0%           | 0.0%           | 0.0%           | 0.0% |
| tr I3LS77 I3LS77         |         | 2             | 1          | 0          | 0              | 0              | 0              | 0              | 2              | 2          | 0          | 0              | 0              | 0              | 0              | 4.5%              | 2.6%       | 0.0%       | 0.0%           | 0.0%           | 0.0%           | 0.0%           | 0.0% |
| tr I3LEK6 I3LEK6         |         | 2             | 1          | 0          | 0              | 0              | 0              | 0              | 2              | 2          | 0          | 0              | 0              | 0              | 0              | 26.7%             | 9.6%       | 0.0%       | 0.0%           | 0.0%           | 0.0%           | 0.0%           | 0.0% |
| tr F1RIW5 F1RIW5         |         | 1             | 1          | 0          | 0              | 0              | 0              | 0              | 1              | 3          | 0          | 0              | 0              | 0              | 0              | 12.3%             | 7.4%       | 0.0%       | 0.0%           | 0.0%           | 0.0%           | 0.0%           | 0.0% |
| tr F1S459 F1S459         |         | 0             | 1          | 0          | 0              | 0              | 0              | 0              | 0              | 4          | 0          | 0              | 0              | 0              | 0              | 0.0%              | 3.5%       | 0.0%       | 0.0%           | 0.0%           | 0.0%           | 0.0%           | 0.0% |
| tr F1S781 F1S781         |         | 3             | 1          | 0          | 0              | 0              | 0              | 0              | 3              | 1          | 0          | 0              | 0              | 0              | 0              | 9.3%              | 2.8%       | 0.0%       | 0.0%           | 0.0%           | 0.0%           | 0.0%           | 0.0% |
| Reverse_tr K7GP99 K7GP99 |         | 0             | 1          | 0          | 0              | 0              | 0              | 0              | 0              | 4          | 0          | 0              | 0              | 0              | 0              | 0.0%              | 0.9%       | 0.0%       | 0.0%           | 0.0%           | 0.0%           | 0.0%           | 0.0% |
| tr F1RKV6 F1RKV6         |         | 2             | 1          | 0          | 0              | 0              | 0              | 0              | 2              | 2          | 0          | 0              | 0              | 0              | 0              | 4.5%              | 1.6%       | 0.0%       | 0.0%           | 0.0%           | 0.0%           | 0.0%           | 0.0% |
| tr F1RXT9 F1RXT9         |         | 2             | 1          | 0          | 0              | 0              | 0              | 0              | 3              | 1          | 0          | 0              | 0              | 0              | 0              | 2.6%              | 1.3%       | 0.0%       | 0.0%           | 0.0%           | 0.0%           | 0.0%           | 0.0% |
| tr F1RRK0 F1RRK0         |         | 4             | 0          | 0          | 0              | 0              | 0              | 0              | 4              | 0          | 0          | 0              | 0              | 0              | 0              | 6.3%              | 0.0%       | 0.0%       | 0.0%           | 0.0%           | 0.0%           | 0.0%           | 0.0% |
| tr F1S956 F1S956         |         | 2             | 1          | 0          | 0              | 0              | 0              | 0              | 2              | 2          | 0          | 0              | 0              | 0              | 0              | 8.6%              | 2.5%       | 0.0%       | 0.0%           | 0.0%           | 0.0%           | 0.0%           | 0.0% |
| tr F1SBT3 F1SBT3         |         | 3             | 0          | 0          | 0              | 0              | 0              | 0              | 4              | 0          | 0          | 0              | 0              | 0              | 0              | 31.7%             | 0.0%       | 0.0%       | 0.0%           | 0.0%           | 0.0%           | 0.0%           | 0.0% |
| tr F1RXC5 F1RXC5         |         | 3             | 0          | 0          | 0              | 0              | 0              | 0              | 4              | 0          | 0          | 0              | 0              | 0              | 0              | 9.8%              | 0.0%       | 0.0%       | 0.0%           | 0.0%           | 0.0%           | 0.0%           | 0.0% |
| tr F1S6R5 F1S6R5         |         | 2             | 1          | 0          | 0              | 0              | 0              | 0              | 2              | 2          | 0          | 0              | 0              | 0              | 0              | 6.9%              | 3.9%       | 0.0%       | 0.0%           | 0.0%           | 0.0%           | 0.0%           | 0.0% |
| tr F1RVX2 F1RVX2         |         | 2             | 0          | 0          | 0              | 0              | 0              | 0              | 4              | 0          | 0          | 0              | 0              | 0              | 0              | 27.3%             | 0.0%       | 0.0%       | 0.0%           | 0.0%           | 0.0%           | 0.0%           | 0.0% |
| tr I3LSR2 I3LSR2         |         | 1             | 1          | 0          | 0              | 0              | 0              | 0              | 1              | 3          | 0          | 0              | 0              | 0              | 0              | 2.2%              | 2.2%       | 0.0%       | 0.0%           | 0.0%           | 0.0%           | 0.0%           | 0.0% |
| tr F1SUG8 F1SUG8         |         | 3             | 0          | 0          | 0              | 0              | 0              | 0              | 4              | 0          | 0          | 0              | 0              | 0              | 0              | 7.6%              | 0.0%       | 0.0%       | 0.0%           | 0.0%           | 0.0%           | 0.0%           | 0.0% |
| tr F1SA22 F1SA22         |         | 0             | 1          | 0          | 0              | 0              | 0              | 0              | 0              | 4          | 0          | 0              | 0              | 0              | 0              | 0.0%              | 0.5%       | 0.0%       | 0.0%           | 0.0%           | 0.0%           | 0.0%           | 0.0% |
| tr F1SCM0 F1SCM0         |         | 2             | 0          | 0          | 0              | 0              | 0              | 0              | 4              | 0          | 0          | 0              | 0              | 0              | 0              | 25.0%             | 0.0%       | 0.0%       | 0.0%           | 0.0%           | 0.0%           | 0.0%           | 0.0% |
| tr F1RPX2 F1RPX2         |         | 1             | 1          | 0          | 0              | 0              | 0              | 0              | 2              | 2          | 0          | 0              | 0              | 0              | 0              | 0.7%              | 1.4%       | 0.0%       | 0.0%           | 0.0%           | 0.0%           | 0.0%           | 0.0% |
| tr I3LPS7 I3LPS7         |         | 0             | 1          | 0          | 0              | 0              | 0              | 0              | 0              | 4          | 0          | 0              | 0              | 0              | 0              | 0.0%              | 9.8%       | 0.0%       | 0.0%           | 0.0%           | 0.0%           | 0.0%           | 0.0% |
| tr F1SE91 F1SE91         |         | 1             | 1          | 0          | 0              | 0              | 0              | 0              | 1              | 3          | 0          | 0              | 0              | 0              | 0              | 2.9%              | 1.0%       | 0.0%       | 0.0%           | 0.0%           | 0.0%           | 0.0%           | 0.0% |
| tr I3LPS9 I3LPS9         |         | 0             | 1          | 0          | 0              | 0              | 0              | 0              | 0              | 4          | 0          | 0              | 0              | 0              | 0              | 0.0%              | 11.1%      | 0.0%       | 0.0%           | 0.0%           | 0.0%           | 0.0%           | 0.0% |
| tr I3LM96 I3LM96         |         | 2             | 0          | 0          | 0              | 0              | 0              | 0              | 4              | 0          | 0          | 0              | 0              | 0              | 0              | 13.7%             | 0.0%       | 0.0%       | 0.0%           | 0.0%           | 0.0%           | 0.0%           | 0.0% |
| tr I3LS29 I3LS29         |         | 2             | 2          | 0          | 0              | 0              | 0              | 0              | 2              | 2          | 0          | 0              | 0              | 0              | 0              | 2.0%              | 1.8%       | 0.0%       | 0.0%           | 0.0%           | 0.0%           | 0.0%           | 0.0% |
| tr I3LSU1 I3LSU1         |         | 0             | 1          | 0          | 0              | 0              | 0              | 0              | 0              | 4          | 0          | 0              | 0              | 0              | 0              | 0.0%              | 4.0%       | 0.0%       | 0.0%           | 0.0%           | 0.0%           | 0.0%           | 0.0% |
| tr K7GL95 K7GL95         |         | 2             | 0          | 0          | 0              | 0              | 0              | 0              | 4              | 0          | 0          | 0              | 0              | 0              | 0              | 16.7%             | 0.0%       | 0.0%       | 0.0%           | 0.0%           | 0.0%           | 0.0%           | 0.0% |
| tr I3LVG2 I3LVG2         |         | 2             | 1          | 0          | 0              | 0              | 0              | 0              | 3              | 1          | 0          | 0              | 0              | 0              | 0              | 9.5%              | 1.7%       | 0.0%       | 0.0%           | 0.0%           | 0.0%           | 0.0%           | 0.0% |
| tr I3LKF7 I3LKF7         |         | 2             | 1          | 0          | 0              | 0              | 0              | 0              | 2              | 2          | 0          | 0              | 0              | 0              | 0              | 4.5%              | 1.8%       | 0.0%       | 0.0%           | 0.0%           | 0.0%           | 0.0%           | 0.0% |
| Reverse_tr F1S585 F1S585 |         | 0             | 1          | 0          | 0              | 0              | 0              | 0              | 0              | 4          | 0          | 0              | 0              | 0              | 0              | 0.0%              | 1.0%       | 0.0%       | 0.0%           | 0.0%           | 0.0%           | 0.0%           | 0.0% |
| tr I3LJV8 I3LJV8         |         | 4             | 0          | 0          | 0              | 0              | 0              | 0              | 4              | 0          | 0          | 0              | 0              | 0              | 0              | 27.5%             | 0.0%       | 0.0%       | 0.0%           | 0.0%           | 0.0%           | 0.0%           | 0.0% |
| tr F1RKM4 F1RKM4         |         | 1             | 1          | 0          | 0              | 0              | 0              | 0              | 1              | 3          | 0          | 0              | 0              | 0              | 0              | 2.8%              | 2.8%       | 0.0%       | 0.0%           | 0.0%           | 0.0%           | 0.0%           | 0.0% |
| tr F1RUJ4 F1RUJ4         |         | 2             | 0          | 0          | 0              | 0              | 0              | 0              | 4              | 0          | 0          | 0              | 0              | 0              | 0              | 3.2%              | 0.0%       | 0.0%       | 0.0%           | 0.0%           | 0.0%           | 0.0%           | 0.0% |
| A1Z623                   |         | 2             | 0          | 0          | 0              | 0              | 0              | 0              | 4              | 0          | 0          | 0              | 0              | 0              | 0              | 15.4%             | 0.0%       | 0.0%       | 0.0%           | 0.0%           | 0.0%           | 0.0%           | 0.0% |
| tr I3LMQ8 I3LMQ8         |         | 4             | 0          | 0          | 0              | 0              | 0              | 0              | 4              | 0          | 0          | 0              | 0              | 0              | 0              | 19.1%             | 0.0%       | 0.0%       | 0.0%           | 0.0%           | 0.0%           | 0.0%           | 0.0% |
| tr F1S8Y4 F1S8Y4         |         | 1             | 1          | 0          | 0              | 0              | 0              | 0              | 3              | 1          | 0          | 0              | 0              | 0              | 0              | 7.1%              | 7.1%       | 0.0%       | 0.0%           | 0.0%           | 0.0%           | 0.0%           | 0.0% |
| tr F1SUQ2 F1SUQ2         |         | 1             | 2          | 0          | 0              | 0              | 0              | 0              | 1              | 3          | 0          | 0              | 0              | 0              | 0              | 10.0%             | 8.3%       | 0.0%       | 0.0%           | 0.0%           | 0.0%           | 0.0%           | 0.0% |
| tr I3LVA4 I3LVA4         |         | 0             | 1          | 0          | 0              | 0              | 0              | 0              | 0              | 4          | 0          | 0              | 0              | 0              | 0              | 0.0%              | 4.4%       | 0.0%       | 0.0%           | 0.0%           | 0.0%           | 0.0%           | 0.0% |
| tr K7GMC4 K7GMC4         |         | 2             | 0          | 0          | 0              | 0              | 0              | 0              | 4              | 0          | 0          | 0              | 0              | 0              | 0              | 9.1%              | 0.0%       | 0.0%       | 0.0%           | 0.0%           | 0.0%           | 0.0%           | 0.0% |
| tr F1S346 F1S346         |         | 2             | 1          | 0          | 0              | 0              | 0              | 0              | 3              | 1          | 0          | 0              | 0              | 0              | 0              | 2.1%              | 1.4%       | 0.0%       | 0.0%           | 0.0%           | 0.0%           | 0.0%           | 0.0% |
| tr F1SBH3 F1SBH3         |         | 3             | 0          | 0          | 0              | 0              | 0              | 0              | 4              | 0          | 0          | 0              | 0              | 0              | 0              | 15.6%             | 0.0%       | 0.0%       | 0.0%           | 0.0%           | 0.0%           | 0.0%           | 0.0% |
| Q8WVN98                  |         | 4             | 0          | 0          | 0              | 0              | 0              | 0              | 4              | 0          | 0          | 0              | 0              | 0              | 0              | 21.6%             | 0.0%       | 0.0%       | 0.0%           | 0.0%           | 0.0%           | 0.0%           | 0.0% |
| tr I3LU87 I3LU87         |         | 0             | 1          | 0          | 0              | 0              | 0              | 0              | 0              | 4          | 0          | 0              | 0              | 0              | 0              | 0.0%              | 1.7%       | 0.0%       | 0.0%           | 0.0%           | 0.0%           | 0.0%           | 0.0% |
| tr I3LIY8 I3LIY8         |         | 2             | 1          | 0          | 0              | 0              | 0              | 0              | 3              | 1          | 0          | 0              | 0              | 0              | 0              | 3.2%              | 2.0%       | 0.0%       | 0.0%           | 0.0%           | 0.0%           | 0.0%           | 0.0% |
| tr F1S4P7 F1S4P7         |         | 4             | 0          | 0          | 0              | 0              | 0              | 0              | 4              | 0          | 0          | 0              | 0              | 0              | 0              | 17.9%             | 0.0%       | 0.0%       | 0.0%           | 0.0%           | 0.0%           | 0.0%           | 0.0% |
| tr F1RVY4 F1RVY4         |         | 3             | 0          | 0          | 0              | 0              | 0              | 0              | 4              | 0          | 0          | 0              | 0              | 0              | 0              | 4.9%              | 0.0%       | 0.0%       | 0.0%           | 0.0%           | 0.0%           | 0.0%           | 0.0% |
| Reverse_tr K7GQX0 K7GQX0 |         | 0             | 1          | 0          | 0              | 0              | 0              | 0              | 0              | 4          | 0          | 0              | 0              | 0              | 0              | 0.0%              | 2.5%       | 0.0%       | 0.0%           | 0.0%           | 0.0%           | 0.0%           | 0.0% |
| tr F1RHS7 F1RHS7         |         | 2             | 1          | 0          | 0              | 0              | 0              | 0              | 3              | 1          | 0          | 0              | 0              | 0              | 0              | 11.1%             | 3.3%       | 0.0%       | 0.0%           | 0.0%           | 0.0%           | 0.0%           | 0.0% |
| tr F1SBP3 F1SBP3         |         | 2             | 0          | 0          | 0              | 0              | 0              | 0              | 4              | 0          | 0          | 0              | 0              | 0              | 0              | 2.5%              | 0.0%       | 0.0%       | 0.0%           | 0.0%           | 0.0%           | 0.0%           | 0.0% |
| A5GFQ5                   |         | 2             | 0          | 0          | 0              | 0              | 0              | 0              | 4              | 0          | 0          | 0              | 0              | 0              | 0              | 12.7%             | 0.0%       | 0.0%       | 0.0%           | 0.0%           | 0.0%           | 0.0%           | 0.0% |
| tr F1S6G0 F1S6G0         |         | 3             | 1          | 0          | 0              | 0              | 0              | 0              | 3              | 1          | 0          | 0              | 0              | 0              | 0              | 6.7%              | 1.4%       | 0.0%       | 0.0%           | 0.0%           | 0.0%           | 0.0%           | 0.0% |
| tr F1RR48 F1RR48         |         | 2             | 1          | 0          | 0              |                |                |                |                |            |            |                |                |                |                |                   |            |            |                |                |                |                |      |

| Accession        | Sample# | Peptide Count |            |            |                |                |                |                | Spectral Count |            |            |                |                |                |                | Sequence Coverage |            |            |                |                |                |                |      |
|------------------|---------|---------------|------------|------------|----------------|----------------|----------------|----------------|----------------|------------|------------|----------------|----------------|----------------|----------------|-------------------|------------|------------|----------------|----------------|----------------|----------------|------|
|                  |         | Whole Cell    | Whole Cell | Whole Cell | Cilia Fraction | Cilia Fraction | Cilia Fraction | Cilia Fraction | Whole Cell     | Whole Cell | Whole Cell | Cilia Fraction | Cilia Fraction | Cilia Fraction | Cilia Fraction | Whole Cell        | Whole Cell | Whole Cell | Cilia Fraction | Cilia Fraction | Cilia Fraction | Cilia Fraction |      |
|                  |         | 1             | 2          | 6          | 4              | 3              | 5              | 7              | 1              | 2          | 6          | 4              | 3              | 5              | 7              | 1                 | 2          | 6          | 4              | 3              | 5              | 7              | 8    |
| tr I3LE0 I3LE0   |         | 3             | 1          | 0          | 0              | 0              | 0              | 0              | 3              | 1          | 0          | 0              | 0              | 0              | 0              | 4.5%              | 1.6%       | 0.0%       | 0.0%           | 0.0%           | 0.0%           | 0.0%           | 0.0% |
| tr F1R189 F1R189 |         | 2             | 1          | 0          | 0              | 0              | 0              | 0              | 2              | 2          | 0          | 0              | 0              | 0              | 0              | 4.4%              | 4.0%       | 0.0%       | 0.0%           | 0.0%           | 0.0%           | 0.0%           | 0.0% |
| tr F1SBM2 F1SBM2 |         | 2             | 1          | 0          | 0              | 0              | 0              | 0              | 2              | 2          | 0          | 0              | 0              | 0              | 0              | 8.0%              | 1.8%       | 0.0%       | 0.0%           | 0.0%           | 0.0%           | 0.0%           | 0.0% |
| tr F1S4N5 F1S4N5 |         | 1             | 1          | 0          | 0              | 0              | 0              | 0              | 1              | 3          | 0          | 0              | 0              | 0              | 0              | 6.1%              | 6.1%       | 0.0%       | 0.0%           | 0.0%           | 0.0%           | 0.0%           | 0.0% |
| tr I3LKD2 I3LKD2 |         | 2             | 1          | 0          | 0              | 0              | 0              | 0              | 2              | 2          | 0          | 0              | 0              | 0              | 0              | 18.1%             | 5.2%       | 0.0%       | 0.0%           | 0.0%           | 0.0%           | 0.0%           | 0.0% |
| tr F1SKJ2 F1SKJ2 |         | 3             | 1          | 0          | 0              | 0              | 0              | 0              | 3              | 1          | 0          | 0              | 0              | 0              | 0              | 22.3%             | 12.7%      | 0.0%       | 0.0%           | 0.0%           | 0.0%           | 0.0%           | 0.0% |
| tr I3LI0 I3LI0   |         | 2             | 0          | 0          | 0              | 0              | 0              | 0              | 4              | 0          | 0          | 0              | 0              | 0              | 0              | 12.3%             | 0.0%       | 0.0%       | 0.0%           | 0.0%           | 0.0%           | 0.0%           | 0.0% |
| tr I3LS97 I3LS97 |         | 2             | 0          | 0          | 0              | 0              | 0              | 0              | 4              | 0          | 0          | 0              | 0              | 0              | 0              | 19.8%             | 0.0%       | 0.0%       | 0.0%           | 0.0%           | 0.0%           | 0.0%           | 0.0% |
| tr F1RTZ5 F1RTZ5 |         | 4             | 0          | 1          | 0              | 0              | 0              | 0              | 4              | 0          | 1          | 0              | 0              | 0              | 0              | 9.4%              | 0.0%       | 2.0%       | 0.0%           | 0.0%           | 0.0%           | 0.0%           | 0.0% |
| tr F1S4Z2 F1S4Z2 |         | 2             | 1          | 1          | 0              | 0              | 0              | 0              | 2              | 2          | 1          | 0              | 0              | 0              | 0              | 12.9%             | 7.1%       | 4.5%       | 0.0%           | 0.0%           | 0.0%           | 0.0%           | 0.0% |
| tr I3LSJ0 I3LSJ0 |         | 2             | 0          | 1          | 0              | 0              | 0              | 0              | 4              | 0          | 1          | 0              | 0              | 0              | 0              | 19.1%             | 0.0%       | 6.7%       | 0.0%           | 0.0%           | 0.0%           | 0.0%           | 0.0% |
| tr F1SSZ9 F1SSZ9 |         | 2             | 1          | 1          | 0              | 0              | 0              | 0              | 2              | 2          | 1          | 0              | 0              | 0              | 0              | 2.6%              | 1.3%       | 2.2%       | 0.0%           | 0.0%           | 0.0%           | 0.0%           | 0.0% |
| tr F1SEE2 F1SEE2 |         | 1             | 1          | 1          | 0              | 0              | 0              | 0              | 1              | 3          | 1          | 0              | 0              | 0              | 0              | 3.9%              | 3.9%       | 7.6%       | 0.0%           | 0.0%           | 0.0%           | 0.0%           | 0.0% |
| tr F1S4P1 F1S4P1 |         | 3             | 1          | 1          | 0              | 0              | 0              | 0              | 3              | 1          | 1          | 0              | 0              | 0              | 0              | 2.6%              | 0.8%       | 0.7%       | 0.0%           | 0.0%           | 0.0%           | 0.0%           | 0.0% |
| tr F1SUK2 F1SUK2 |         | 3             | 1          | 1          | 0              | 0              | 0              | 0              | 3              | 1          | 1          | 0              | 0              | 0              | 0              | 8.3%              | 2.9%       | 1.7%       | 0.0%           | 0.0%           | 0.0%           | 0.0%           | 0.0% |
| Q29551           |         | 2             | 1          | 1          | 0              | 0              | 0              | 0              | 3              | 1          | 1          | 0              | 0              | 0              | 0              | 7.9%              | 5.4%       | 5.2%       | 0.0%           | 0.0%           | 0.0%           | 0.0%           | 0.0% |
| tr F1SQJ5 F1SQJ5 |         | 3             | 0          | 1          | 0              | 0              | 0              | 0              | 4              | 0          | 1          | 0              | 0              | 0              | 0              | 12.8%             | 0.0%       | 2.7%       | 0.0%           | 0.0%           | 0.0%           | 0.0%           | 0.0% |
| tr I3L6C1 I3L6C1 |         | 1             | 2          | 1          | 0              | 0              | 0              | 0              | 2              | 2          | 1          | 0              | 0              | 0              | 0              | 0.9%              | 2.3%       | 1.2%       | 0.0%           | 0.0%           | 0.0%           | 0.0%           | 0.0% |
| tr F1RZV7 F1RZV7 |         | 2             | 1          | 1          | 0              | 0              | 0              | 0              | 2              | 2          | 1          | 0              | 0              | 0              | 0              | 5.6%              | 1.7%       | 3.1%       | 0.0%           | 0.0%           | 0.0%           | 0.0%           | 0.0% |
| tr F1SCR9 F1SCR9 |         | 1             | 1          | 1          | 0              | 0              | 0              | 0              | 1              | 3          | 1          | 0              | 0              | 0              | 0              | 2.5%              | 1.9%       | 1.8%       | 0.0%           | 0.0%           | 0.0%           | 0.0%           | 0.0% |
| tr F1S386 F1S386 |         | 3             | 0          | 1          | 0              | 0              | 0              | 0              | 4              | 0          | 2          | 0              | 0              | 0              | 0              | 8.8%              | 0.0%       | 7.4%       | 0.0%           | 0.0%           | 0.0%           | 0.0%           | 0.0% |
| tr F1RT57 F1RT57 |         | 4             | 0          | 2          | 0              | 0              | 0              | 0              | 4              | 0          | 2          | 0              | 0              | 0              | 0              | 7.9%              | 0.0%       | 2.8%       | 0.0%           | 0.0%           | 0.0%           | 0.0%           | 0.0% |
| tr I3LDM7 I3LDM7 |         | 2             | 1          | 1          | 0              | 0              | 0              | 0              | 2              | 2          | 2          | 0              | 0              | 0              | 0              | 14.7%             | 9.8%       | 14.7%      | 0.0%           | 0.0%           | 0.0%           | 0.0%           | 0.0% |
| tr F1S145 F1S145 |         | 1             | 0          | 1          | 0              | 0              | 0              | 0              | 4              | 0          | 2          | 0              | 0              | 0              | 0              | 11.4%             | 0.0%       | 11.4%      | 0.0%           | 0.0%           | 0.0%           | 0.0%           | 0.0% |
| tr F1RMY9 F1RMY9 |         | 3             | 0          | 1          | 0              | 0              | 0              | 0              | 4              | 0          | 2          | 0              | 0              | 0              | 0              | 8.8%              | 0.0%       | 3.5%       | 0.0%           | 0.0%           | 0.0%           | 0.0%           | 0.0% |
| tr I3LUF8 I3LUF8 |         | 2             | 2          | 1          | 0              | 0              | 0              | 0              | 2              | 2          | 2          | 0              | 0              | 0              | 0              | 9.7%              | 4.8%       | 5.4%       | 0.0%           | 0.0%           | 0.0%           | 0.0%           | 0.0% |
| tr F1RT06 F1RT06 |         | 0             | 3          | 1          | 0              | 0              | 0              | 0              | 0              | 4          | 2          | 0              | 0              | 0              | 0              | 0.0%              | 12.5%      | 6.5%       | 0.0%           | 0.0%           | 0.0%           | 0.0%           | 0.0% |
| tr F1RNM4 F1RNM4 |         | 3             | 0          | 1          | 0              | 0              | 0              | 0              | 4              | 0          | 2          | 0              | 0              | 0              | 0              | 9.1%              | 0.0%       | 3.6%       | 0.0%           | 0.0%           | 0.0%           | 0.0%           | 0.0% |
| tr F1SIP9 F1SIP9 |         | 3             | 0          | 1          | 0              | 0              | 0              | 0              | 4              | 0          | 3          | 0              | 0              | 0              | 0              | 4.7%              | 0.0%       | 1.7%       | 0.0%           | 0.0%           | 0.0%           | 0.0%           | 0.0% |
| tr F1S8W2 F1S8W2 |         | 0             | 2          | 1          | 0              | 0              | 0              | 0              | 0              | 4          | 3          | 0              | 0              | 0              | 0              | 0.0%              | 3.8%       | 4.0%       | 0.0%           | 0.0%           | 0.0%           | 0.0%           | 0.0% |
| tr I3LNZ2 I3LNZ2 |         | 1             | 2          | 1          | 0              | 0              | 0              | 0              | 2              | 2          | 3          | 0              | 0              | 0              | 0              | 6.7%              | 11.3%      | 9.8%       | 0.0%           | 0.0%           | 0.0%           | 0.0%           | 0.0% |
| tr F1SQ44 F1SQ44 |         | 2             | 0          | 1          | 0              | 0              | 0              | 0              | 4              | 0          | 3          | 0              | 0              | 0              | 0              | 10.1%             | 0.0%       | 11.5%      | 0.0%           | 0.0%           | 0.0%           | 0.0%           | 0.0% |
| tr I3LSY2 I3LSY2 |         | 3             | 0          | 1          | 0              | 0              | 0              | 0              | 4              | 0          | 3          | 0              | 0              | 0              | 0              | 4.8%              | 0.0%       | 1.8%       | 0.0%           | 0.0%           | 0.0%           | 0.0%           | 0.0% |
| tr F1RJ88 F1RJ88 |         | 1             | 2          | 1          | 0              | 0              | 0              | 0              | 1              | 3          | 3          | 0              | 0              | 0              | 0              | 1.3%              | 2.2%       | 1.3%       | 0.0%           | 0.0%           | 0.0%           | 0.0%           | 0.0% |
| tr I3LUZ8 I3LUZ8 |         | 2             | 0          | 2          | 0              | 0              | 0              | 0              | 4              | 0          | 3          | 0              | 0              | 0              | 0              | 31.9%             | 0.0%       | 24.5%      | 0.0%           | 0.0%           | 0.0%           | 0.0%           | 0.0% |
| tr F1SIE7 F1SIE7 |         | 2             | 1          | 2          | 0              | 0              | 0              | 0              | 3              | 1          | 3          | 0              | 0              | 0              | 0              | 6.1%              | 2.8%       | 3.9%       | 0.0%           | 0.0%           | 0.0%           | 0.0%           | 0.0% |
| tr F2Z5T8 F2Z5T8 |         | 3             | 0          | 1          | 0              | 0              | 0              | 0              | 4              | 0          | 3          | 0              | 0              | 0              | 0              | 31.7%             | 0.0%       | 9.7%       | 0.0%           | 0.0%           | 0.0%           | 0.0%           | 0.0% |
| tr F1S766 F1S766 |         | 2             | 0          | 1          | 0              | 0              | 0              | 0              | 4              | 0          | 3          | 0              | 0              | 0              | 0              | 10.3%             | 0.0%       | 11.6%      | 0.0%           | 0.0%           | 0.0%           | 0.0%           | 0.0% |
| tr F1RUE3 F1RUE3 |         | 3             | 0          | 1          | 0              | 0              | 0              | 0              | 4              | 0          | 3          | 0              | 0              | 0              | 0              | 7.4%              | 0.0%       | 3.5%       | 0.0%           | 0.0%           | 0.0%           | 0.0%           | 0.0% |
| tr F1RS16 F1RS16 |         | 1             | 1          | 1          | 0              | 0              | 0              | 0              | 1              | 3          | 3          | 0              | 0              | 0              | 0              | 1.4%              | 1.7%       | 3.2%       | 0.0%           | 0.0%           | 0.0%           | 0.0%           | 0.0% |
| tr I3L9X2 I3L9X2 |         | 1             | 1          | 1          | 0              | 0              | 0              | 0              | 2              | 2          | 3          | 0              | 0              | 0              | 0              | 1.7%              | 1.7%       | 2.3%       | 0.0%           | 0.0%           | 0.0%           | 0.0%           | 0.0% |
| tr F1SIR4 F1SIR4 |         | 3             | 0          | 1          | 0              | 0              | 0              | 0              | 4              | 0          | 3          | 0              | 0              | 0              | 0              | 2.9%              | 0.0%       | 1.1%       | 0.0%           | 0.0%           | 0.0%           | 0.0%           | 0.0% |
| tr I3LKU9 I3LKU9 |         | 2             | 1          | 2          | 0              | 0              | 0              | 0              | 3              | 1          | 3          | 0              | 0              | 0              | 0              | 13.5%             | 4.7%       | 8.1%       | 0.0%           | 0.0%           | 0.0%           | 0.0%           | 0.0% |
| tr I3L9C3 I3L9C3 |         | 1             | 1          | 1          | 0              | 0              | 0              | 0              | 1              | 3          | 4          | 0              | 0              | 0              | 0              | 14.4%             | 3.1%       | 7.7%       | 0.0%           | 0.0%           | 0.0%           | 0.0%           | 0.0% |
| tr F1SNX8 F1SNX8 |         | 4             | 0          | 1          | 0              | 0              | 0              | 0              | 4              | 0          | 4          | 0              | 0              | 0              | 0              | 10.9%             | 0.0%       | 3.7%       | 0.0%           | 0.0%           | 0.0%           | 0.0%           | 0.0% |
| tr F1RTV6 F1RTV6 |         | 3             | 1          | 2          | 0              | 0              | 0              | 0              | 3              | 1          | 4          | 0              | 0              | 0              | 0              | 12.7%             | 8.1%       | 4.9%       | 0.0%           | 0.0%           | 0.0%           | 0.0%           | 0.0% |
| tr K7GP19 K7GP19 |         | 4             | 0          | 1          | 0              | 0              | 0              | 0              | 4              | 0          | 4          | 0              | 0              | 0              | 0              | 18.8%             | 0.0%       | 9.7%       | 0.0%           | 0.0%           | 0.0%           | 0.0%           | 0.0% |
| tr F1RF76 F1RF76 |         | 3             | 0          | 1          | 0              | 0              | 0              | 0              | 4              | 0          | 4          | 0              | 0              | 0              | 0              | 6.5%              | 0.0%       | 2.6%       | 0.0%           | 0.0%           | 0.0%           | 0.0%           | 0.0% |
| tr I3LQA8 I3LQA8 |         | 4             | 0          | 1          | 0              | 0              | 0              | 0              | 4              | 0          | 4          | 0              | 0              | 0              | 0              | 14.9%             | 0.0%       | 6.4%       | 0.0%           | 0.0%           | 0.0%           | 0.0%           | 0.0% |
| tr I3L6J1 I3L6J1 |         | 3             | 0          | 2          | 0              | 0              | 0              | 0              | 4              | 0          | 4          | 0              | 0              | 0              | 0              | 4.4%              | 0.0%       | 5.8%       | 0.0%           | 0.0%           | 0.0%           | 0.0%           | 0.0% |
| tr F1SJ69 F1SJ69 |         | 0             | 1          | 1          | 0              | 0              | 0              | 0              | 0              | 4          | 5          | 0              | 0              | 0              | 0              | 0.0%              | 0.6%       | 1.5%       | 0.0%           | 0.0%           | 0.0%           | 0.0%           | 0.0% |
| tr F1RYH8 F1RYH8 |         | 4             | 0          | 2          | 0              | 0              | 0              | 0              | 4              | 0          | 5          | 0              | 0              | 0              | 0              | 21.6%             | 0.0%       | 7.1%       | 0.0%           | 0.0%           | 0.0%           | 0.0%           | 0.0% |
| tr F1S9W3 F1S9W3 |         | 1             | 1          | 2          | 0              | 0              | 0              | 0              | 1              | 3          | 5          | 0              | 0              | 0              | 0              | 1.5%              | 1.6%       | 2.9%       | 0.0%           | 0.0%           | 0.0%           | 0.0%           | 0.0% |
| tr I3LCI4 I3LCI4 |         | 1             | 1          | 2          | 0              | 0              | 0              | 0              | 1              | 3          | 5          | 0              | 0              | 0              | 0              | 3.4%              | 2.5%       | 12.9%      | 0.0%           | 0.0%           | 0.0%           | 0.0%           | 0.0% |
| tr F1S8A5 F1S8A5 |         | 3             | 0          | 1          | 0              | 0              | 0              | 0              | 4              | 0          | 5          | 0              | 0              | 0              | 0              | 19.0%             | 0.0%       | 8.8%       | 0.0%           | 0.0%           | 0.0%           | 0.0%           | 0.0% |
| tr F1RM10 F1RM10 |         | 3             | 0          | 3          | 0              | 0              | 0              | 0              | 4              | 0          | 6          | 0              | 0              | 0              | 0              | 4.8%              | 0.0%       | 3.8%       | 0.0%           | 0.0%           | 0.0%           | 0.0%           | 0.0% |
| tr F1RWL7 F1RWL7 |         | 1             | 0          | 2          | 0              | 0              | 0              | 0              | 4              | 0          | 6          | 0              | 0              | 0              | 0              | 8.6%              | 0.0%       | 8.6%       | 0.0%           | 0.0%           | 0.0%           | 0.0%           | 0.0% |
| tr Q06A95 Q06A95 |         | 4             | 0          | 3          | 0              | 0              | 0              | 0              | 4              | 0          | 6          | 0              | 0              | 0              | 0              | 14.5%             | 0.0%       | 5.5%       | 0.0%           | 0.0%           | 0.0%           | 0.0%           | 0.0% |
| tr F1RXF7 F1RXF7 |         | 3             | 1          | 1          | 0              | 0              | 0              | 0              | 3              | 1          | 6          | 0              | 0              | 0              | 0              | 24.0%             | 3.1%       | 7.2%       | 0.0%           | 0.0%           | 0.0%           | 0.0%           | 0.0% |
| tr F1S2L2 F1S2L2 |         | 3             | 0          | 1          | 0              | 0              | 0              | 0              | 4              | 0          | 6          | 0              | 0              | 0              | 0              | 8.5%              | 0.0%       | 3.3%       | 0.0%           | 0.0%           | 0.0%           | 0.0%           | 0.0% |
| tr F1S6Q1 F1S6Q1 |         | 4             | 0          | 1          | 0              | 0              | 0              | 0              | 4              | 0          | 6          | 0              | 0              | 0              | 0              | 35.4%             | 0.0%       | 6.9%       | 0.0%           | 0.0%           | 0.0%           | 0.0%           | 0.0% |
| tr F1RS21 F1RS21 |         | 3             | 1          | 2          | 0              | 0              | 0              | 0              | 3              | 1          | 7          | 0              | 0              | 0              | 0              | 15.0%             | 2.4%       | 8.1%       | 0.0%           | 0.0%           | 0.0%           | 0.0%           | 0.0% |
| tr F1RVH7 F1RVH7 |         | 3             | 0          | 2          | 0              | 0              | 0              | 0              | 4              | 0          | 7          | 0              | 0              | 0              | 0              | 18.8%             | 0.0%       | 5.7%       | 0.0%           | 0.0%           | 0.0%           | 0.0%           | 0.0% |
| tr F1SBY5 F1SBY5 |         | 3             | 1          | 3          | 0              | 0              | 0              | 0              | 3              | 1          | 7          | 0              | 0              | 0              | 0              | 2.3%              | 1.0%       | 2.7%       | 0.0%           | 0.0%           | 0.0%           | 0.0%           | 0.0% |
| tr I3LETO I3LETO |         | 1             | 0          | 2          | 0              | 0              | 0              | 0              | 4              | 0          | 9          | 0              | 0              | 0              | 0              | 17.3%             | 0.0%       | 33.3%      | 0.0%           | 0.0%           | 0.0%           | 0.0%           | 0.0% |
| tr I3LAE7 I3LAE7 |         | 2             | 0          | 2          | 0              | 0              | 0              | 0              | 4              | 0          | 9          | 0              | 0              | 0              | 0              | 21.7%             | 0.0%       | 18.7%      | 0.0%           | 0.0%           | 0.0%           | 0.0%           | 0.0% |
| tr F1RJE4 F1RJE4 |         | 3             | 1          | 2          | 0              | 0              | 0              | 0              | 3              | 1          | 9          | 0              | 0              | 0              | 0              | 7.6%              | 1.7%       | 5.1%       | 0.0%           | 0.0%           | 0.0%           | 0.0%           | 0.0% |
| tr F1S7W         |         |               |            |            |                |                |                |                |                |            |            |                |                |                |                |                   |            |            |                |                |                |                |      |

| Sample#          | Peptide Count |            |            |                |                |                |                | Spectral Count |            |            |                |                |                |                | Sequence Coverage |            |            |                |                |                |                |      |       |       |      |
|------------------|---------------|------------|------------|----------------|----------------|----------------|----------------|----------------|------------|------------|----------------|----------------|----------------|----------------|-------------------|------------|------------|----------------|----------------|----------------|----------------|------|-------|-------|------|
|                  | Whole Cell    | Whole Cell | Whole Cell | Cilia Fraction | Cilia Fraction | Cilia Fraction | Cilia Fraction | Whole Cell     | Whole Cell | Whole Cell | Cilia Fraction | Cilia Fraction | Cilia Fraction | Cilia Fraction | Whole Cell        | Whole Cell | Whole Cell | Cilia Fraction | Cilia Fraction | Cilia Fraction | Cilia Fraction |      |       |       |      |
|                  | 1             | 2          | 6          | 4              | 3              | 5              | 7              | 8              | 1          | 2          | 6              | 4              | 3              | 5              | 7                 | 8          | 1          | 2              | 6              | 4              | 3              | 5    | 7     | 8     |      |
| Accession        |               |            |            |                |                |                |                |                |            |            |                |                |                |                |                   |            |            |                |                |                |                |      |       |       |      |
| tr I3LQG4 I3LQG4 | 3             | 0          | 3          | 0              | 0              | 0              | 0              | 0              | 4          | 0          | 115            | 0              | 0              | 0              | 0                 | 0          | 37.5%      | 0.0%           | 37.5%          | 0.0%           | 0.0%           | 0.0% | 0.0%  | 0.0%  |      |
| tr F1RV70 F1RV70 | 2             | 1          | 2          | 0              | 0              | 0              | 0              | 0              | 3          | 1          | 136            | 0              | 0              | 0              | 0                 | 0          | 10.2%      | 3.3%           | 7.7%           | 0.0%           | 0.0%           | 0.0% | 0.0%  | 0.0%  |      |
| tr K7GMG4 K7GMG4 | 0             | 1          | 0          | 0              | 0              | 0              | 1              | 1              | 0          | 3          | 0              | 0              | 0              | 0              | 29                | 13         | 0.0%       | 19.1%          | 0.0%           | 0.0%           | 0.0%           | 0.0% | 19.1% | 19.1% |      |
| tr F1RZB0 F1RZB0 | 3             | 0          | 1          | 0              | 0              | 0              | 0              | 10             | 3          | 0          | 1              | 0              | 0              | 0              | 0                 | 31         | 5.6%       | 0.0%           | 3.4%           | 0.0%           | 0.0%           | 0.0% | 0.0%  | 16.6% |      |
| tr F1RVP8 F1RVP8 | 2             | 0          | 0          | 0              | 0              | 0              | 2              | 4              | 3          | 0          | 0              | 0              | 0              | 0              | 7                 | 16         | 4.9%       | 0.0%           | 0.0%           | 0.0%           | 0.0%           | 0.0% | 5.7%  | 10.5% |      |
| Q29268           | 3             | 0          | 1          | 0              | 0              | 0              | 1              | 6              | 3          | 0          | 2              | 0              | 0              | 0              | 5                 | 33         | 39.0%      | 0.0%           | 14.4%          | 0.0%           | 0.0%           | 0.0% | 15.3% | 39.0% |      |
| tr Q31072 Q31072 | 3             | 0          | 1          | 0              | 0              | 0              | 2              | 4              | 3          | 0          | 2              | 0              | 0              | 0              | 9                 | 19         | 10.2%      | 0.0%           | 4.1%           | 0.0%           | 0.0%           | 0.0% | 8.6%  | 14.3% |      |
| tr F1RQ23 F1RQ23 | 3             | 0          | 0          | 0              | 0              | 0              | 1              | 3              | 3          | 0          | 0              | 0              | 0              | 0              | 2                 | 12         | 11.4%      | 0.0%           | 0.0%           | 0.0%           | 0.0%           | 0.0% | 5.1%  | 11.4% |      |
| tr I3LDU9 I3LDU9 | 3             | 0          | 1          | 0              | 0              | 0              | 1              | 6              | 3          | 0          | 4              | 0              | 0              | 0              | 1                 | 27         | 7.4%       | 0.0%           | 3.0%           | 0.0%           | 0.0%           | 0.0% | 1.9%  | 16.7% |      |
| tr I3LI91 I3LI91 | 1             | 1          | 0          | 0              | 0              | 0              | 1              | 3              | 1          | 2          | 0              | 0              | 0              | 0              | 3                 | 9          | 5.1%       | 3.3%           | 0.0%           | 0.0%           | 0.0%           | 0.0% | 3.3%  | 11.4% |      |
| tr I3LSQ2 I3LSQ2 | 1             | 1          | 0          | 0              | 0              | 0              | 1              | 3              | 1          | 2          | 0              | 0              | 0              | 0              | 3                 | 9          | 5.1%       | 3.3%           | 0.0%           | 0.0%           | 0.0%           | 0.0% | 3.3%  | 11.5% |      |
| tr F1RWH1 F1RWH1 | 1             | 1          | 2          | 0              | 0              | 0              | 2              | 1              | 1          | 2          | 6              | 0              | 0              | 0              | 27                | 1          | 8.6%       | 8.6%           | 9.7%           | 0.0%           | 0.0%           | 0.0% | 24.3% | 8.6%  |      |
| tr F1S4V8 F1S4V8 | 2             | 0          | 0          | 0              | 0              | 0              | 2              | 1              | 3          | 0          | 0              | 0              | 0              | 0              | 8                 | 1          | 7.6%       | 0.0%           | 0.0%           | 0.0%           | 0.0%           | 0.0% | 7.6%  | 3.7%  |      |
| tr I3LMD6 I3LMD6 | 2             | 0          | 0          | 0              | 0              | 0              | 0              | 4              | 3          | 0          | 0              | 0              | 0              | 0              | 0                 | 8          | 3.3%       | 0.0%           | 0.0%           | 0.0%           | 0.0%           | 0.0% | 0.0%  | 5.8%  |      |
| tr F1STQ3 F1STQ3 | 2             | 0          | 1          | 0              | 0              | 0              | 0              | 5              | 3          | 0          | 5              | 0              | 0              | 0              | 0                 | 21         | 2.0%       | 0.0%           | 3.5%           | 0.0%           | 0.0%           | 0.0% | 0.0%  | 7.9%  |      |
| P48762           | 2             | 0          | 1          | 0              | 0              | 0              | 0              | 5              | 3          | 0          | 5              | 0              | 0              | 0              | 0                 | 21         | 2.0%       | 0.0%           | 3.5%           | 0.0%           | 0.0%           | 0.0% | 0.0%  | 7.9%  |      |
| tr M9MMN8 M9MMN8 | 2             | 0          | 0          | 0              | 0              | 0              | 0              | 3              | 3          | 0          | 0              | 0              | 0              | 0              | 0                 | 7          | 3.8%       | 0.0%           | 0.0%           | 0.0%           | 0.0%           | 0.0% | 0.0%  | 5.1%  |      |
| tr F1RZ68 F1RZ68 | 2             | 0          | 0          | 0              | 0              | 0              | 0              | 2              | 3          | 0          | 0              | 0              | 0              | 0              | 0                 | 7          | 4.1%       | 0.0%           | 0.0%           | 0.0%           | 0.0%           | 0.0% | 0.0%  | 4.1%  |      |
| tr F1RZ67 F1RZ67 | 2             | 0          | 0          | 0              | 0              | 0              | 0              | 2              | 3          | 0          | 0              | 0              | 0              | 0              | 0                 | 7          | 4.2%       | 0.0%           | 0.0%           | 0.0%           | 0.0%           | 0.0% | 0.0%  | 4.2%  |      |
| tr F1RFH5 F1RFH5 | 2             | 0          | 0          | 0              | 0              | 0              | 1              | 2              | 3          | 0          | 0              | 0              | 0              | 0              | 3                 | 2          | 9.7%       | 0.0%           | 0.0%           | 0.0%           | 0.0%           | 0.0% | 4.2%  | 8.1%  |      |
| tr F2Z5F9 F2Z5F9 | 1             | 0          | 1          | 0              | 0              | 0              | 0              | 2              | 3          | 0          | 3              | 0              | 0              | 0              | 0                 | 8          | 3.3%       | 0.0%           | 4.6%           | 0.0%           | 0.0%           | 0.0% | 0.0%  | 10.5% |      |
| tr F1RQC2 F1RQC2 | 2             | 1          | 0          | 0              | 0              | 0              | 0              | 2              | 2          | 1          | 0              | 0              | 0              | 0              | 0                 | 4          | 3.8%       | 2.7%           | 0.0%           | 0.0%           | 0.0%           | 0.0% | 0.0%  | 7.5%  |      |
| tr I3LUW0 I3LUW0 | 1             | 0          | 0          | 0              | 0              | 0              | 2              | 0              | 3          | 0          | 0              | 0              | 0              | 0              | 4                 | 0          | 11.8%      | 0.0%           | 0.0%           | 0.0%           | 0.0%           | 0.0% | 11.8% | 0.0%  |      |
| tr I3LVQ2 I3LVQ2 | 2             | 0          | 1          | 0              | 0              | 0              | 0              | 3              | 3          | 0          | 4              | 0              | 0              | 0              | 0                 | 8          | 7.2%       | 0.0%           | 5.0%           | 0.0%           | 0.0%           | 0.0% | 0.0%  | 8.7%  |      |
| tr I3LBF5 I3LBF5 | 2             | 0          | 0          | 0              | 0              | 0              | 1              | 0              | 3          | 0          | 0              | 0              | 0              | 0              | 3                 | 0          | 7.8%       | 0.0%           | 0.0%           | 0.0%           | 0.0%           | 0.0% | 6.6%  | 0.0%  |      |
| tr I3LS87 I3LS87 | 3             | 0          | 0          | 0              | 0              | 0              | 0              | 2              | 3          | 0          | 0              | 0              | 0              | 0              | 0                 | 3          | 7.4%       | 0.0%           | 0.0%           | 0.0%           | 0.0%           | 0.0% | 0.0%  | 9.6%  |      |
| tr I3LHF2 I3LHF2 | 1             | 0          | 0          | 0              | 0              | 0              | 1              | 0              | 3          | 0          | 0              | 0              | 0              | 0              | 3                 | 0          | 15.1%      | 0.0%           | 0.0%           | 0.0%           | 0.0%           | 0.0% | 15.1% | 0.0%  |      |
| tr I3LE14 I3LE14 | 1             | 0          | 0          | 0              | 0              | 0              | 0              | 1              | 3          | 0          | 0              | 0              | 0              | 0              | 0                 | 3          | 11.8%      | 0.0%           | 0.0%           | 0.0%           | 0.0%           | 0.0% | 0.0%  | 11.8% |      |
| tr I3LJG1 I3LJG1 | 3             | 0          | 1          | 0              | 0              | 0              | 0              | 2              | 3          | 0          | 3              | 0              | 0              | 0              | 0                 | 5          | 26.9%      | 0.0%           | 10.8%          | 0.0%           | 0.0%           | 0.0% | 0.0%  | 11.3% |      |
| tr F1S9T0 F1S9T0 | 2             | 0          | 1          | 0              | 0              | 0              | 0              | 1              | 3          | 0          | 1              | 0              | 0              | 0              | 0                 | 3          | 9.6%       | 0.0%           | 5.2%           | 0.0%           | 0.0%           | 0.0% | 0.0%  | 4.4%  |      |
| tr F1RGU8 F1RGU8 | 3             | 0          | 0          | 0              | 0              | 0              | 0              | 2              | 3          | 0          | 0              | 0              | 0              | 0              | 0                 | 2          | 26.5%      | 0.0%           | 0.0%           | 0.0%           | 0.0%           | 0.0% | 0.0%  | 19.6% |      |
| tr I3L5P2 I3L5P2 | 2             | 0          | 0          | 0              | 0              | 0              | 1              | 0              | 3          | 0          | 0              | 0              | 0              | 0              | 2                 | 0          | 4.3%       | 0.0%           | 0.0%           | 0.0%           | 0.0%           | 0.0% | 5.7%  | 0.0%  |      |
| tr I3LNF8 I3LNF8 | 3             | 0          | 0          | 0              | 0              | 0              | 0              | 1              | 3          | 0          | 0              | 0              | 0              | 0              | 0                 | 2          | 4.1%       | 0.0%           | 0.0%           | 0.0%           | 0.0%           | 0.0% | 0.0%  | 1.8%  |      |
| tr F1RRB6 F1RRB6 | 1             | 1          | 0          | 0              | 0              | 0              | 0              | 1              | 1          | 2          | 0              | 0              | 0              | 0              | 0                 | 2          | 13.9%      | 5.0%           | 0.0%           | 0.0%           | 0.0%           | 0.0% | 0.0%  | 13.9% |      |
| tr F2Z5C0 F2Z5C0 | 1             | 1          | 0          | 0              | 0              | 0              | 1              | 1              | 2          | 1          | 0              | 0              | 0              | 0              | 1                 | 1          | 8.1%       | 8.1%           | 0.0%           | 0.0%           | 0.0%           | 0.0% | 8.1%  | 8.1%  |      |
| tr I3LJ76 I3LJ76 | 1             | 0          | 0          | 0              | 0              | 0              | 0              | 1              | 3          | 0          | 0              | 0              | 0              | 0              | 0                 | 2          | 19.8%      | 0.0%           | 0.0%           | 0.0%           | 0.0%           | 0.0% | 0.0%  | 19.8% |      |
| P20460           | 2             | 0          | 0          | 0              | 0              | 0              | 1              | 0              | 3          | 0          | 0              | 0              | 0              | 0              | 2                 | 0          | 25.7%      | 0.0%           | 0.0%           | 0.0%           | 0.0%           | 0.0% | 18.6% | 0.0%  |      |
| tr F1SP28 F1SP28 | 2             | 0          | 0          | 0              | 0              | 0              | 0              | 1              | 3          | 0          | 0              | 0              | 0              | 0              | 0                 | 2          | 8.8%       | 0.0%           | 0.0%           | 0.0%           | 0.0%           | 0.0% | 0.0%  | 8.8%  |      |
| tr F1S3V2 F1S3V2 | 0             | 1          | 0          | 0              | 0              | 0              | 1              | 1              | 0          | 3          | 0              | 0              | 0              | 0              | 0                 | 1          | 1          | 0.0%           | 2.1%           | 0.0%           | 0.0%           | 0.0% | 0.0%  | 4.1%  | 4.1% |
| tr F1S0X9 F1S0X9 | 1             | 1          | 0          | 0              | 0              | 0              | 0              | 1              | 2          | 1          | 0              | 0              | 0              | 0              | 0                 | 2          | 4.6%       | 4.6%           | 0.0%           | 0.0%           | 0.0%           | 0.0% | 0.0%  | 4.6%  |      |
| tr F1SJ2E F1SJ2E | 2             | 1          | 2          | 0              | 0              | 0              | 0              | 4              | 2          | 1          | 7              | 0              | 0              | 0              | 0                 | 6          | 2.9%       | 1.0%           | 2.6%           | 0.0%           | 0.0%           | 0.0% | 0.0%  | 6.4%  |      |
| tr I7KJP5 I7KJP5 | 3             | 0          | 2          | 0              | 0              | 0              | 1              | 0              | 3          | 0          | 19             | 0              | 0              | 0              | 12                | 0          | 22.3%      | 0.0%           | 9.6%           | 0.0%           | 0.0%           | 0.0% | 9.6%  | 0.0%  |      |
| tr F1S5M9 F1S5M9 | 1             | 1          | 3          | 0              | 0              | 0              | 0              | 5              | 1          | 2          | 12             | 0              | 0              | 0              | 0                 | 8          | 3.4%       | 2.5%           | 11.5%          | 0.0%           | 0.0%           | 0.0% | 0.0%  | 11.2% |      |
| tr I3L8Y2 I3L8Y2 | 2             | 0          | 1          | 0              | 0              | 0              | 2              | 0              | 3          | 0          | 9              | 0              | 0              | 0              | 0                 | 6          | 0          | 26.4%          | 0.0%           | 18.9%          | 0.0%           | 0.0% | 0.0%  | 34.0% | 0.0% |
| tr F1SKI8 F1SKI8 | 2             | 1          | 1          | 0              | 0              | 0              | 1              | 1              | 2          | 1          | 3              | 0              | 0              | 0              | 2                 | 1          | 6.3%       | 1.5%           | 1.9%           | 0.0%           | 0.0%           | 0.0% | 1.5%  | 2.9%  |      |
| tr F1RJH3 F1RJH3 | 1             | 1          | 1          | 0              | 0              | 0              | 0              | 1              | 1          | 2          | 1              | 0              | 0              | 0              | 0                 | 2          | 3.6%       | 5.6%           | 7.9%           | 0.0%           | 0.0%           | 0.0% | 0.0%  | 5.6%  |      |
| tr F1RFS8 F1RFS8 | 3             | 0          | 1          | 0              | 0              | 0              | 0              | 1              | 3          | 0          | 3              | 0              | 0              | 0              | 0                 | 2          | 13.7%      | 0.0%           | 4.1%           | 0.0%           | 0.0%           | 0.0% | 0.0%  | 4.1%  |      |
| tr I3LVK7 I3LVK7 | 1             | 1          | 0          | 0              | 0              | 0              | 0              | 1              | 2          | 1          | 0              | 0              | 0              | 0              | 0                 | 1          | 5.0%       | 5.0%           | 0.0%           | 0.0%           | 0.0%           | 0.0% | 0.0%  | 14.2% |      |
| tr F1SOA3 F1SOA3 | 3             | 0          | 0          | 0              | 0              | 0              | 0              | 1              | 3          | 0          | 0              | 0              | 0              | 0              | 0                 | 1          | 10.4%      | 0.0%           | 0.0%           | 0.0%           | 0.0%           | 0.0% | 0.0%  | 3.0%  |      |
| tr I3LKK5 I3LKK5 | 2             | 0          | 0          | 0              | 0              | 0              | 0              | 1              | 3          | 0          | 0              | 0              | 0              | 0              | 0                 | 1          | 6.2%       | 0.0%           | 0.0%           | 0.0%           | 0.0%           | 0.0% | 0.0%  | 5.2%  |      |
| tr F1RKS8 F1RKS8 | 1             | 2          | 0          | 0              | 0              | 0              | 0              | 1              | 1          | 2          | 0              | 0              | 0              | 0              | 0                 | 1          | 5.7%       | 6.5%           | 0.0%           | 0.0%           | 0.0%           | 0.0% | 0.0%  | 5.7%  |      |
| tr F1SC49 F1SC49 | 2             | 0          | 0          | 0              | 0              | 0              | 0              | 1              | 3          | 0          | 0              | 0              | 0              | 0              | 0                 | 1          | 3.1%       | 0.0%           | 0.0%           | 0.0%           | 0.0%           | 0.0% | 0.0%  | 1.5%  |      |
| tr F1SQY7 F1SQY7 | 2             | 1          | 0          | 0              | 0              | 0              | 0              | 1              | 2          | 1          | 0              | 0              | 0              | 0              | 0                 | 1          | 4.6%       | 2.3%           | 0.0%           | 0.0%           | 0.0%           | 0.0% | 0.0%  | 2.3%  |      |
| tr F1RHJ3 F1RHJ3 | 2             | 0          | 0          | 0              | 0              | 0              | 0              | 1              | 3          | 0          | 0              | 0              | 0              | 0              | 0                 | 1          | 4.7%       | 0.0%           | 0.0%           | 0.0%           | 0.0%           | 0.0% | 0.0%  | 4.7%  |      |
| tr F1RNN0 F1RNN0 | 1             | 1          | 1          | 0              | 0              | 0              | 0              | 2              | 2          | 1          | 10             | 0              | 0              | 0              | 0                 | 4          | 5.4%       | 7.0%           | 5.4%           | 0.0%           | 0.0%           | 0.0% | 0.0%  | 12.4% |      |
| tr I3LRK6 I3LRK6 | 2             | 0          | 2          | 0              | 0              | 0              | 0              | 1              | 3          | 0          | 2              | 0              | 0              | 0              | 0                 | 1          | 14.1%      | 0.0%           | 14.5%          | 0.0%           | 0.0%           | 0.0% | 0.0%  | 6.6%  |      |
| tr I3LC07 I3LC07 | 3             | 0          | 1          | 0              | 0              | 0              | 0              | 1              | 3          | 0          | 2              | 0              | 0              | 0              | 0                 | 1          | 19.4%      | 0.0%           | 7.3%           | 0.0%           | 0.0%           | 0.0% | 0.0%  | 9.2%  |      |
| tr F1SUU4 F1SUU4 | 2             | 0          | 3          | 0              | 0              | 0              | 1              | 1              | 3          | 0          | 8              | 0              | 0              | 0              | 1                 | 1          | 4.8%       | 0.0%           | 11.1%          | 0.0%           | 0.0%           | 0.0% | 4.0%  | 4.8%  |      |
| tr F1S7J6 F1S7J6 | 2             | 1          | 7          | 0              | 0              | 0              | 1              | 1              | 2          | 1          | 47             | 0              | 0              | 0              | 0                 | 8          | 1          | 3.8%           | 1.3%           | 8.3%           | 0.0%           | 0.0% | 0.0%  | 3.5%  | 3.5% |
| tr F1SJ27 F1SJ27 | 2             | 0          | 1          | 0              | 0              | 0              | 0              | 1              | 3          | 0          | 3              | 0              | 0              | 0              | 0                 | 1          | 5.6%       | 0.0%           | 3.1%           | 0.0%           | 0.0%           | 0.0% | 0.0%  | 2.0%  |      |
| tr F1RK58 F1RK58 | 1             | 0          | 1          | 0              | 0              | 0              | 0              | 1              | 3          | 0          | 4              | 0              | 0              | 0              | 0                 | 1          | 6.0%       | 0.0%           | 5.4%           | 0.0%           | 0.0%           | 0.0% | 0.0%  | 8.2%  |      |
| tr K7GSV4 K7GSV4 | 3             | 0          | 2          | 0              | 0              | 0              | 0              | 1              | 3          | 0          | 5              | 0              | 0              | 0              | 0                 | 1          | 15.0%      | 0.0%           | 8.0%           | 0.0%           | 0.0%           | 0.0% | 0.0%  | 5.2%  |      |
| tr K7GSS4 K7GSS4 | 3             | 0          | 2          | 0              | 0              | 0              | 0              | 1              | 3          | 0          | 5              | 0              | 0              | 0              | 0                 | 1          | 14.5%      | 0.0%           | 7.7%           | 0.0%           | 0.0%           | 0.0% | 0.0%  | 5.0%  |      |
| tr F1RT12 F1RT12 |               |            |            |                |                |                |                |                |            |            |                |                |                |                |                   |            |            |                |                |                |                |      |       |       |      |



| Accession        | Sample# | Peptide Count |            |            |                |                |                |                | Spectral Count |            |            |                |                |                |                | Sequence Coverage |            |            |                |                |                |                |      |
|------------------|---------|---------------|------------|------------|----------------|----------------|----------------|----------------|----------------|------------|------------|----------------|----------------|----------------|----------------|-------------------|------------|------------|----------------|----------------|----------------|----------------|------|
|                  |         | Whole Cell    | Whole Cell | Whole Cell | Cilia Fraction | Cilia Fraction | Cilia Fraction | Cilia Fraction | Whole Cell     | Whole Cell | Whole Cell | Cilia Fraction | Cilia Fraction | Cilia Fraction | Cilia Fraction | Whole Cell        | Whole Cell | Whole Cell | Cilia Fraction | Cilia Fraction | Cilia Fraction | Cilia Fraction |      |
|                  |         | 1             | 2          | 6          | 4              | 3              | 5              | 7              | 1              | 2          | 6          | 4              | 3              | 5              | 7              | 1                 | 2          | 6          | 4              | 3              | 5              | 7              | 8    |
| tr I3LA23 I3LA23 |         | 1             | 1          | 0          | 0              | 0              | 0              | 0              | 2              | 1          | 0          | 0              | 0              | 0              | 0              | 5.5%              | 2.5%       | 0.0%       | 0.0%           | 0.0%           | 0.0%           | 0.0%           | 0.0% |
| tr I3LE05 I3LE05 |         | 2             | 1          | 0          | 0              | 0              | 0              | 0              | 2              | 1          | 0          | 0              | 0              | 0              | 0              | 4.4%              | 1.5%       | 0.0%       | 0.0%           | 0.0%           | 0.0%           | 0.0%           | 0.0% |
| tr F2Z506 F2Z506 |         | 1             | 1          | 0          | 0              | 0              | 0              | 0              | 1              | 2          | 0          | 0              | 0              | 0              | 0              | 2.4%              | 2.4%       | 0.0%       | 0.0%           | 0.0%           | 0.0%           | 0.0%           | 0.0% |
| tr F1SKM5 F1SKM5 |         | 3             | 0          | 0          | 0              | 0              | 0              | 0              | 3              | 0          | 0          | 0              | 0              | 0              | 0              | 15.1%             | 0.0%       | 0.0%       | 0.0%           | 0.0%           | 0.0%           | 0.0%           | 0.0% |
| tr I3LLW6 I3LLW6 |         | 1             | 0          | 0          | 0              | 0              | 0              | 0              | 3              | 0          | 0          | 0              | 0              | 0              | 0              | 5.4%              | 0.0%       | 0.0%       | 0.0%           | 0.0%           | 0.0%           | 0.0%           | 0.0% |
| tr I3LGM5 I3LGM5 |         | 3             | 0          | 0          | 0              | 0              | 0              | 0              | 3              | 0          | 0          | 0              | 0              | 0              | 0              | 55.8%             | 0.0%       | 0.0%       | 0.0%           | 0.0%           | 0.0%           | 0.0%           | 0.0% |
| tr I3LSF4 I3LSF4 |         | 2             | 0          | 0          | 0              | 0              | 0              | 0              | 3              | 0          | 0          | 0              | 0              | 0              | 0              | 10.9%             | 0.0%       | 0.0%       | 0.0%           | 0.0%           | 0.0%           | 0.0%           | 0.0% |
| tr F1SP03 F1SP03 |         | 3             | 0          | 0          | 0              | 0              | 0              | 0              | 3              | 0          | 0          | 0              | 0              | 0              | 0              | 7.0%              | 0.0%       | 0.0%       | 0.0%           | 0.0%           | 0.0%           | 0.0%           | 0.0% |
| tr F1S771 F1S771 |         | 1             | 2          | 0          | 0              | 0              | 0              | 0              | 1              | 2          | 0          | 0              | 0              | 0              | 0              | 2.8%              | 4.4%       | 0.0%       | 0.0%           | 0.0%           | 0.0%           | 0.0%           | 0.0% |
| tr I3LCT6 I3LCT6 |         | 0             | 1          | 0          | 0              | 0              | 0              | 0              | 0              | 3          | 0          | 0              | 0              | 0              | 0              | 0.0%              | 3.7%       | 0.0%       | 0.0%           | 0.0%           | 0.0%           | 0.0%           | 0.0% |
| tr I3LRX5 I3LRX5 |         | 1             | 0          | 0          | 0              | 0              | 0              | 0              | 3              | 0          | 0          | 0              | 0              | 0              | 0              | 5.9%              | 0.0%       | 0.0%       | 0.0%           | 0.0%           | 0.0%           | 0.0%           | 0.0% |
| tr F1RV39 F1RV39 |         | 1             | 1          | 0          | 0              | 0              | 0              | 0              | 1              | 2          | 0          | 0              | 0              | 0              | 0              | 14.6%             | 3.5%       | 0.0%       | 0.0%           | 0.0%           | 0.0%           | 0.0%           | 0.0% |
| tr F1RUQ5 F1RUQ5 |         | 2             | 0          | 0          | 0              | 0              | 0              | 0              | 3              | 0          | 0          | 0              | 0              | 0              | 0              | 9.2%              | 0.0%       | 0.0%       | 0.0%           | 0.0%           | 0.0%           | 0.0%           | 0.0% |
| tr F1RHT9 F1RHT9 |         | 1             | 1          | 0          | 0              | 0              | 0              | 0              | 2              | 1          | 0          | 0              | 0              | 0              | 0              | 2.4%              | 1.3%       | 0.0%       | 0.0%           | 0.0%           | 0.0%           | 0.0%           | 0.0% |
| tr F1RFG5 F1RFG5 |         | 2             | 1          | 0          | 0              | 0              | 0              | 0              | 2              | 1          | 0          | 0              | 0              | 0              | 0              | 3.9%              | 1.0%       | 0.0%       | 0.0%           | 0.0%           | 0.0%           | 0.0%           | 0.0% |
| tr I3LDY4 I3LDY4 |         | 1             | 1          | 0          | 0              | 0              | 0              | 0              | 1              | 2          | 0          | 0              | 0              | 0              | 0              | 4.1%              | 4.1%       | 0.0%       | 0.0%           | 0.0%           | 0.0%           | 0.0%           | 0.0% |
| tr F2Z5I3 F2Z5I3 |         | 1             | 1          | 0          | 0              | 0              | 0              | 0              | 1              | 2          | 0          | 0              | 0              | 0              | 0              | 21.5%             | 25.3%      | 0.0%       | 0.0%           | 0.0%           | 0.0%           | 0.0%           | 0.0% |
| tr I3L928 I3L928 |         | 3             | 0          | 0          | 0              | 0              | 0              | 0              | 3              | 0          | 0          | 0              | 0              | 0              | 0              | 9.1%              | 0.0%       | 0.0%       | 0.0%           | 0.0%           | 0.0%           | 0.0%           | 0.0% |
| tr I3LU02 I3LU02 |         | 1             | 0          | 0          | 0              | 0              | 0              | 0              | 3              | 0          | 0          | 0              | 0              | 0              | 0              | 1.9%              | 0.0%       | 0.0%       | 0.0%           | 0.0%           | 0.0%           | 0.0%           | 0.0% |
| tr F1RUF7 F1RUF7 |         | 1             | 1          | 0          | 0              | 0              | 0              | 0              | 2              | 1          | 0          | 0              | 0              | 0              | 0              | 7.5%              | 7.5%       | 0.0%       | 0.0%           | 0.0%           | 0.0%           | 0.0%           | 0.0% |
| tr I3LI55 I3LI55 |         | 0             | 2          | 0          | 0              | 0              | 0              | 0              | 0              | 3          | 0          | 0              | 0              | 0              | 0              | 0.0%              | 1.7%       | 0.0%       | 0.0%           | 0.0%           | 0.0%           | 0.0%           | 0.0% |
| tr F1SM93 F1SM93 |         | 0             | 1          | 0          | 0              | 0              | 0              | 0              | 0              | 3          | 0          | 0              | 0              | 0              | 0              | 0.0%              | 16.4%      | 0.0%       | 0.0%           | 0.0%           | 0.0%           | 0.0%           | 0.0% |
| tr F1RQ47 F1RQ47 |         | 1             | 2          | 0          | 0              | 0              | 0              | 0              | 1              | 2          | 0          | 0              | 0              | 0              | 0              | 2.6%              | 5.8%       | 0.0%       | 0.0%           | 0.0%           | 0.0%           | 0.0%           | 0.0% |
| tr F1SNU2 F1SNU2 |         | 0             | 1          | 0          | 0              | 0              | 0              | 0              | 0              | 3          | 0          | 0              | 0              | 0              | 0              | 0.0%              | 3.4%       | 0.0%       | 0.0%           | 0.0%           | 0.0%           | 0.0%           | 0.0% |
| Q767M3           |         | 1             | 1          | 0          | 0              | 0              | 0              | 0              | 1              | 2          | 0          | 0              | 0              | 0              | 0              | 0.7%              | 1.5%       | 0.0%       | 0.0%           | 0.0%           | 0.0%           | 0.0%           | 0.0% |
| tr I3LCX2 I3LCX2 |         | 1             | 1          | 0          | 0              | 0              | 0              | 0              | 2              | 1          | 0          | 0              | 0              | 0              | 0              | 3.9%              | 1.6%       | 0.0%       | 0.0%           | 0.0%           | 0.0%           | 0.0%           | 0.0% |
| tr I3LDY4 I3LDY4 |         | 2             | 0          | 0          | 0              | 0              | 0              | 0              | 3              | 0          | 0          | 0              | 0              | 0              | 0              | 23.2%             | 0.0%       | 0.0%       | 0.0%           | 0.0%           | 0.0%           | 0.0%           | 0.0% |
| tr F2Z5C8 F2Z5C8 |         | 0             | 1          | 0          | 0              | 0              | 0              | 0              | 0              | 3          | 0          | 0              | 0              | 0              | 0              | 0.0%              | 7.2%       | 0.0%       | 0.0%           | 0.0%           | 0.0%           | 0.0%           | 0.0% |
| Q767K9           |         | 1             | 1          | 0          | 0              | 0              | 0              | 0              | 1              | 2          | 0          | 0              | 0              | 0              | 0              | 3.6%              | 1.2%       | 0.0%       | 0.0%           | 0.0%           | 0.0%           | 0.0%           | 0.0% |
| Q767K6           |         | 1             | 2          | 0          | 0              | 0              | 0              | 0              | 1              | 2          | 0          | 0              | 0              | 0              | 0              | 1.1%              | 2.1%       | 0.0%       | 0.0%           | 0.0%           | 0.0%           | 0.0%           | 0.0% |
| tr F1SPI3 F1SPI3 |         | 2             | 0          | 0          | 0              | 0              | 0              | 0              | 3              | 0          | 0          | 0              | 0              | 0              | 0              | 2.7%              | 0.0%       | 0.0%       | 0.0%           | 0.0%           | 0.0%           | 0.0%           | 0.0% |
| tr F1SAC0 F1SAC0 |         | 1             | 0          | 0          | 0              | 0              | 0              | 0              | 3              | 0          | 0          | 0              | 0              | 0              | 0              | 10.2%             | 0.0%       | 0.0%       | 0.0%           | 0.0%           | 0.0%           | 0.0%           | 0.0% |
| tr F1SOG2 F1SOG2 |         | 1             | 1          | 0          | 0              | 0              | 0              | 0              | 2              | 1          | 0          | 0              | 0              | 0              | 0              | 3.8%              | 2.5%       | 0.0%       | 0.0%           | 0.0%           | 0.0%           | 0.0%           | 0.0% |
| tr I3LF61 I3LF61 |         | 1             | 1          | 0          | 0              | 0              | 0              | 0              | 1              | 2          | 0          | 0              | 0              | 0              | 0              | 4.2%              | 2.9%       | 0.0%       | 0.0%           | 0.0%           | 0.0%           | 0.0%           | 0.0% |
| tr I3LMH3 I3LMH3 |         | 0             | 2          | 0          | 0              | 0              | 0              | 0              | 0              | 3          | 0          | 0              | 0              | 0              | 0              | 0.0%              | 2.6%       | 0.0%       | 0.0%           | 0.0%           | 0.0%           | 0.0%           | 0.0% |
| tr I3LNP0 I3LNP0 |         | 1             | 0          | 0          | 0              | 0              | 0              | 0              | 3              | 0          | 0          | 0              | 0              | 0              | 0              | 3.8%              | 0.0%       | 0.0%       | 0.0%           | 0.0%           | 0.0%           | 0.0%           | 0.0% |
| tr F1SQJ2 F1SQJ2 |         | 1             | 1          | 0          | 0              | 0              | 0              | 0              | 1              | 2          | 0          | 0              | 0              | 0              | 0              | 7.4%              | 7.4%       | 0.0%       | 0.0%           | 0.0%           | 0.0%           | 0.0%           | 0.0% |
| tr F1SQA3 F1SQA3 |         | 0             | 2          | 0          | 0              | 0              | 0              | 0              | 0              | 3          | 0          | 0              | 0              | 0              | 0              | 0.0%              | 10.1%      | 0.0%       | 0.0%           | 0.0%           | 0.0%           | 0.0%           | 0.0% |
| tr F1RSW6 F1RSW6 |         | 1             | 0          | 0          | 0              | 0              | 0              | 0              | 3              | 0          | 0          | 0              | 0              | 0              | 0              | 16.2%             | 0.0%       | 0.0%       | 0.0%           | 0.0%           | 0.0%           | 0.0%           | 0.0% |
| tr F1RFJ5 F1RFJ5 |         | 1             | 0          | 0          | 0              | 0              | 0              | 0              | 3              | 0          | 0          | 0              | 0              | 0              | 0              | 7.4%              | 0.0%       | 0.0%       | 0.0%           | 0.0%           | 0.0%           | 0.0%           | 0.0% |
| tr I3LIM8 I3LIM8 |         | 2             | 1          | 0          | 0              | 0              | 0              | 0              | 2              | 1          | 0          | 0              | 0              | 0              | 0              | 3.0%              | 3.5%       | 0.0%       | 0.0%           | 0.0%           | 0.0%           | 0.0%           | 0.0% |
| tr I3LUQ2 I3LUQ2 |         | 2             | 0          | 0          | 0              | 0              | 0              | 0              | 3              | 0          | 0          | 0              | 0              | 0              | 0              | 4.4%              | 0.0%       | 0.0%       | 0.0%           | 0.0%           | 0.0%           | 0.0%           | 0.0% |
| tr I3LRC4 I3LRC4 |         | 3             | 0          | 0          | 0              | 0              | 0              | 0              | 3              | 0          | 0          | 0              | 0              | 0              | 0              | 26.9%             | 0.0%       | 0.0%       | 0.0%           | 0.0%           | 0.0%           | 0.0%           | 0.0% |
| tr F1SC66 F1SC66 |         | 2             | 0          | 0          | 0              | 0              | 0              | 0              | 3              | 0          | 0          | 0              | 0              | 0              | 0              | 4.3%              | 0.0%       | 0.0%       | 0.0%           | 0.0%           | 0.0%           | 0.0%           | 0.0% |
| tr I3LSY9 I3LSY9 |         | 1             | 1          | 0          | 0              | 0              | 0              | 0              | 1              | 2          | 0          | 0              | 0              | 0              | 0              | 5.9%              | 4.9%       | 0.0%       | 0.0%           | 0.0%           | 0.0%           | 0.0%           | 0.0% |
| tr F1RTW8 F1RTW8 |         | 0             | 2          | 0          | 0              | 0              | 0              | 0              | 0              | 3          | 0          | 0              | 0              | 0              | 0              | 0.0%              | 4.6%       | 0.0%       | 0.0%           | 0.0%           | 0.0%           | 0.0%           | 0.0% |
| tr F1RYU4 F1RYU4 |         | 2             | 0          | 0          | 0              | 0              | 0              | 0              | 3              | 0          | 0          | 0              | 0              | 0              | 0              | 5.6%              | 0.0%       | 0.0%       | 0.0%           | 0.0%           | 0.0%           | 0.0%           | 0.0% |
| tr F1RY61 F1RY61 |         | 1             | 1          | 0          | 0              | 0              | 0              | 0              | 1              | 2          | 0          | 0              | 0              | 0              | 0              | 3.1%              | 2.9%       | 0.0%       | 0.0%           | 0.0%           | 0.0%           | 0.0%           | 0.0% |
| tr F1RG43 F1RG43 |         | 3             | 0          | 0          | 0              | 0              | 0              | 0              | 3              | 0          | 0          | 0              | 0              | 0              | 0              | 3.4%              | 0.0%       | 0.0%       | 0.0%           | 0.0%           | 0.0%           | 0.0%           | 0.0% |
| tr F1S6A9 F1S6A9 |         | 3             | 0          | 0          | 0              | 0              | 0              | 0              | 3              | 0          | 0          | 0              | 0              | 0              | 0              | 20.5%             | 0.0%       | 0.0%       | 0.0%           | 0.0%           | 0.0%           | 0.0%           | 0.0% |
| tr F1SSD4 F1SSD4 |         | 1             | 1          | 0          | 0              | 0              | 0              | 0              | 1              | 2          | 0          | 0              | 0              | 0              | 0              | 6.3%              | 6.3%       | 0.0%       | 0.0%           | 0.0%           | 0.0%           | 0.0%           | 0.0% |
| tr F1SIL5 F1SIL5 |         | 1             | 2          | 0          | 0              | 0              | 0              | 0              | 1              | 2          | 0          | 0              | 0              | 0              | 0              | 0.6%              | 0.9%       | 0.0%       | 0.0%           | 0.0%           | 0.0%           | 0.0%           | 0.0% |
| tr I3LL57 I3LL57 |         | 1             | 1          | 0          | 0              | 0              | 0              | 0              | 1              | 2          | 0          | 0              | 0              | 0              | 0              | 3.6%              | 2.2%       | 0.0%       | 0.0%           | 0.0%           | 0.0%           | 0.0%           | 0.0% |
| tr F1RHF2 F1RHF2 |         | 2             | 0          | 0          | 0              | 0              | 0              | 0              | 3              | 0          | 0          | 0              | 0              | 0              | 0              | 4.8%              | 0.0%       | 0.0%       | 0.0%           | 0.0%           | 0.0%           | 0.0%           | 0.0% |
| tr F1RUE9 F1RUE9 |         | 1             | 1          | 0          | 0              | 0              | 0              | 0              | 1              | 2          | 0          | 0              | 0              | 0              | 0              | 3.5%              | 1.4%       | 0.0%       | 0.0%           | 0.0%           | 0.0%           | 0.0%           | 0.0% |
| tr I3LFH4 I3LFH4 |         | 0             | 1          | 0          | 0              | 0              | 0              | 0              | 0              | 3          | 0          | 0              | 0              | 0              | 0              | 0.0%              | 3.3%       | 0.0%       | 0.0%           | 0.0%           | 0.0%           | 0.0%           | 0.0% |
| tr I3LU36 I3LU36 |         | 0             | 1          | 0          | 0              | 0              | 0              | 0              | 0              | 3          | 0          | 0              | 0              | 0              | 0              | 0.0%              | 0.9%       | 0.0%       | 0.0%           | 0.0%           | 0.0%           | 0.0%           | 0.0% |
| tr I3LEG3 I3LEG3 |         | 2             | 0          | 0          | 0              | 0              | 0              | 0              | 3              | 0          | 0          | 0              | 0              | 0              | 0              | 6.8%              | 0.0%       | 0.0%       | 0.0%           | 0.0%           | 0.0%           | 0.0%           | 0.0% |
| tr K7GQX8 K7GQX8 |         | 0             | 1          | 0          | 0              | 0              | 0              | 0              | 0              | 3          | 0          | 0              | 0              | 0              | 0              | 0.0%              | 37.5%      | 0.0%       | 0.0%           | 0.0%           | 0.0%           | 0.0%           | 0.0% |
| tr F1SPQ3 F1SPQ3 |         | 0             | 2          | 0          | 0              | 0              | 0              | 0              | 0              | 3          | 0          | 0              | 0              | 0              | 0              | 0.0%              | 36.2%      | 0.0%       | 0.0%           | 0.0%           | 0.0%           | 0.0%           | 0.0% |
| tr F1SP54 F1SP54 |         | 2             | 0          | 0          | 0              | 0              | 0              | 0              | 3              | 0          | 0          | 0              | 0              | 0              | 0              | 5.2%              | 0.0%       | 0.0%       | 0.0%           | 0.0%           | 0.0%           | 0.0%           | 0.0% |
| tr F1SJG9 F1SJG9 |         | 0             | 2          | 0          | 0              | 0              | 0              | 0              | 0              | 3          | 0          | 0              | 0              | 0              | 0              | 0.0%              | 1.5%       | 0.0%       | 0.0%           | 0.0%           | 0.0%           | 0.0%           | 0.0% |
| tr K7GM95 K7GM95 |         | 2             | 0          | 0          | 0              | 0              | 0              | 0              | 3              | 0          | 0          | 0              | 0              | 0              | 0              | 4.5%              | 0.0%       | 0.0%       | 0.0%           | 0.0%           | 0.0%           | 0.0%           | 0.0% |
| tr F1SC76 F1SC76 |         | 0             | 2          | 0          | 0              | 0              | 0              | 0              | 0              | 3          | 0          | 0              | 0              | 0              | 0              | 0.0%              | 11.0%      | 0.0%       | 0.0%           | 0.0%           | 0.0%           | 0.0%           | 0.0% |
| Q06AA4           |         | 1             | 0          | 0          | 0              | 0              | 0              | 0              | 3              | 0          | 0          | 0              | 0              | 0              | 0              | 4.6%              | 0.0%       | 0.0%       | 0.0%           | 0.0%           | 0.0%           | 0.0%           | 0.0% |
| tr E1B2C7 E1B2C7 |         | 1             | 1          | 0          | 0              | 0              | 0              | 0              | 1              | 2          | 0          | 0              | 0              | 0              | 0              | 2.6%              | 2.6%       | 0.0%       | 0.0%           | 0.0%           | 0.0%           | 0.0%           | 0.0% |
| tr F1SSD0 F1SSD0 |         | 2             | 1          | 0          | 0              | 0              | 0              | 0              | 2              | 1          | 0          | 0              | 0              | 0              | 0              | 2.4%              | 1.7%       | 0.0%       | 0.0%           | 0.0%           | 0.0%           | 0.0%           | 0.0% |
| tr F1RR46 F1RR46 |         | 1             | 1          | 0          | 0              | 0              | 0              | 0              | 1</            |            |            |                |                |                |                |                   |            |            |                |                |                |                |      |

| Sample#                  | Peptide Count |            |            |                |                |                |                | Spectral Count |            |            |                |                |                |                | Sequence Coverage |            |            |                |                |                |                |      |
|--------------------------|---------------|------------|------------|----------------|----------------|----------------|----------------|----------------|------------|------------|----------------|----------------|----------------|----------------|-------------------|------------|------------|----------------|----------------|----------------|----------------|------|
|                          | Whole Cell    | Whole Cell | Whole Cell | Cilia Fraction | Cilia Fraction | Cilia Fraction | Cilia Fraction | Whole Cell     | Whole Cell | Whole Cell | Cilia Fraction | Cilia Fraction | Cilia Fraction | Cilia Fraction | Whole Cell        | Whole Cell | Whole Cell | Cilia Fraction | Cilia Fraction | Cilia Fraction | Cilia Fraction |      |
|                          | 1             | 2          | 6          | 4              | 3              | 5              | 7              | 1              | 2          | 6          | 4              | 3              | 5              | 7              | 1                 | 2          | 6          | 4              | 3              | 5              | 7              | 8    |
| Accession                |               |            |            |                |                |                |                |                |            |            |                |                |                |                |                   |            |            |                |                |                |                |      |
| tr Q0GA84 Q0GA84         | 1             | 1          | 0          | 0              | 0              | 0              | 0              | 1              | 2          | 0          | 0              | 0              | 0              | 0              | 4.6%              | 4.3%       | 0.0%       | 0.0%           | 0.0%           | 0.0%           | 0.0%           | 0.0% |
| tr I3L7U1 I3L7U1         | 1             | 0          | 0          | 0              | 0              | 0              | 0              | 3              | 0          | 0          | 0              | 0              | 0              | 0              | 5.4%              | 0.0%       | 0.0%       | 0.0%           | 0.0%           | 0.0%           | 0.0%           | 0.0% |
| tr F1SBF6 F1SBF6         | 3             | 0          | 0          | 0              | 0              | 0              | 0              | 3              | 0          | 0          | 0              | 0              | 0              | 0              | 10.8%             | 0.0%       | 0.0%       | 0.0%           | 0.0%           | 0.0%           | 0.0%           | 0.0% |
| tr F1RXV1 F1RXV1         | 0             | 1          | 0          | 0              | 0              | 0              | 0              | 0              | 3          | 0          | 0              | 0              | 0              | 0              | 0.0%              | 3.2%       | 0.0%       | 0.0%           | 0.0%           | 0.0%           | 0.0%           | 0.0% |
| Reverse_tr F2Z5K6 F2Z5K6 | 1             | 0          | 0          | 0              | 0              | 0              | 0              | 3              | 0          | 0          | 0              | 0              | 0              | 0              | 16.2%             | 0.0%       | 0.0%       | 0.0%           | 0.0%           | 0.0%           | 0.0%           | 0.0% |
| tr I3LQ80 I3LQ80         | 0             | 1          | 0          | 0              | 0              | 0              | 0              | 0              | 3          | 0          | 0              | 0              | 0              | 0              | 0.0%              | 4.8%       | 0.0%       | 0.0%           | 0.0%           | 0.0%           | 0.0%           | 0.0% |
| tr Q8WNNW8 Q8WNNW8       | 1             | 1          | 0          | 0              | 0              | 0              | 0              | 1              | 2          | 0          | 0              | 0              | 0              | 0              | 4.5%              | 2.5%       | 0.0%       | 0.0%           | 0.0%           | 0.0%           | 0.0%           | 0.0% |
| tr K7GMR8 K7GMR8         | 1             | 1          | 0          | 0              | 0              | 0              | 0              | 1              | 2          | 0          | 0              | 0              | 0              | 0              | 3.8%              | 2.1%       | 0.0%       | 0.0%           | 0.0%           | 0.0%           | 0.0%           | 0.0% |
| tr F1SBU5 F1SBU5         | 2             | 0          | 0          | 0              | 0              | 0              | 0              | 3              | 0          | 0          | 0              | 0              | 0              | 0              | 4.8%              | 0.0%       | 0.0%       | 0.0%           | 0.0%           | 0.0%           | 0.0%           | 0.0% |
| tr F1RZ13 F1RZ13         | 3             | 0          | 0          | 0              | 0              | 0              | 0              | 3              | 0          | 0          | 0              | 0              | 0              | 0              | 7.5%              | 0.0%       | 0.0%       | 0.0%           | 0.0%           | 0.0%           | 0.0%           | 0.0% |
| tr I3L5S1 I3L5S1         | 2             | 0          | 0          | 0              | 0              | 0              | 0              | 3              | 0          | 0          | 0              | 0              | 0              | 0              | 7.2%              | 0.0%       | 0.0%       | 0.0%           | 0.0%           | 0.0%           | 0.0%           | 0.0% |
| tr K7GPA5 K7GPA5         | 1             | 0          | 0          | 0              | 0              | 0              | 0              | 3              | 0          | 0          | 0              | 0              | 0              | 0              | 1.6%              | 0.0%       | 0.0%       | 0.0%           | 0.0%           | 0.0%           | 0.0%           | 0.0% |
| tr K7GQW8 K7GQW8         | 2             | 0          | 0          | 0              | 0              | 0              | 0              | 3              | 0          | 0          | 0              | 0              | 0              | 0              | 10.2%             | 0.0%       | 0.0%       | 0.0%           | 0.0%           | 0.0%           | 0.0%           | 0.0% |
| tr F1SK46 F1SK46         | 0             | 2          | 0          | 0              | 0              | 0              | 0              | 0              | 3          | 0          | 0              | 0              | 0              | 0              | 0.0%              | 8.6%       | 0.0%       | 0.0%           | 0.0%           | 0.0%           | 0.0%           | 0.0% |
| tr F1SF34 F1SF34         | 1             | 0          | 0          | 0              | 0              | 0              | 0              | 3              | 0          | 0          | 0              | 0              | 0              | 0              | 5.2%              | 0.0%       | 0.0%       | 0.0%           | 0.0%           | 0.0%           | 0.0%           | 0.0% |
| tr I3L9L4 I3L9L4         | 1             | 0          | 0          | 0              | 0              | 0              | 0              | 3              | 0          | 0          | 0              | 0              | 0              | 0              | 7.7%              | 0.0%       | 0.0%       | 0.0%           | 0.0%           | 0.0%           | 0.0%           | 0.0% |
| tr F1SB99 F1SB99         | 1             | 0          | 0          | 0              | 0              | 0              | 0              | 3              | 0          | 0          | 0              | 0              | 0              | 0              | 2.6%              | 0.0%       | 0.0%       | 0.0%           | 0.0%           | 0.0%           | 0.0%           | 0.0% |
| A5GFY4                   | 2             | 0          | 0          | 0              | 0              | 0              | 0              | 3              | 0          | 0          | 0              | 0              | 0              | 0              | 6.8%              | 0.0%       | 0.0%       | 0.0%           | 0.0%           | 0.0%           | 0.0%           | 0.0% |
| tr F1RXX0 F1RXX0         | 1             | 0          | 0          | 0              | 0              | 0              | 0              | 3              | 0          | 0          | 0              | 0              | 0              | 0              | 14.4%             | 0.0%       | 0.0%       | 0.0%           | 0.0%           | 0.0%           | 0.0%           | 0.0% |
| tr I3LBQ4 I3LBQ4         | 3             | 0          | 0          | 0              | 0              | 0              | 0              | 3              | 0          | 0          | 0              | 0              | 0              | 0              | 3.8%              | 0.0%       | 0.0%       | 0.0%           | 0.0%           | 0.0%           | 0.0%           | 0.0% |
| tr I3LRD0 I3LRD0         | 1             | 0          | 0          | 0              | 0              | 0              | 0              | 3              | 0          | 0          | 0              | 0              | 0              | 0              | 15.1%             | 0.0%       | 0.0%       | 0.0%           | 0.0%           | 0.0%           | 0.0%           | 0.0% |
| tr I3L908 I3L908         | 1             | 1          | 0          | 0              | 0              | 0              | 0              | 1              | 2          | 0          | 0              | 0              | 0              | 0              | 1.2%              | 1.0%       | 0.0%       | 0.0%           | 0.0%           | 0.0%           | 0.0%           | 0.0% |
| tr I3LCJ3 I3LCJ3         | 1             | 1          | 0          | 0              | 0              | 0              | 0              | 1              | 2          | 0          | 0              | 0              | 0              | 0              | 4.8%              | 3.9%       | 0.0%       | 0.0%           | 0.0%           | 0.0%           | 0.0%           | 0.0% |
| tr I3LT95 I3LT95         | 2             | 1          | 0          | 0              | 0              | 0              | 0              | 2              | 1          | 0          | 0              | 0              | 0              | 0              | 11.8%             | 4.8%       | 0.0%       | 0.0%           | 0.0%           | 0.0%           | 0.0%           | 0.0% |
| tr F1SLQ7 F1SLQ7         | 2             | 0          | 0          | 0              | 0              | 0              | 0              | 3              | 0          | 0          | 0              | 0              | 0              | 0              | 12.6%             | 0.0%       | 0.0%       | 0.0%           | 0.0%           | 0.0%           | 0.0%           | 0.0% |
| tr I3L5P9 I3L5P9         | 1             | 1          | 0          | 0              | 0              | 0              | 0              | 2              | 1          | 0          | 0              | 0              | 0              | 0              | 13.5%             | 13.5%      | 0.0%       | 0.0%           | 0.0%           | 0.0%           | 0.0%           | 0.0% |
| tr F1S6V3 F1S6V3         | 1             | 1          | 0          | 0              | 0              | 0              | 0              | 2              | 1          | 0          | 0              | 0              | 0              | 0              | 0.8%              | 1.3%       | 0.0%       | 0.0%           | 0.0%           | 0.0%           | 0.0%           | 0.0% |
| A3KCL7                   | 1             | 1          | 0          | 0              | 0              | 0              | 0              | 1              | 2          | 0          | 0              | 0              | 0              | 0              | 11.4%             | 5.6%       | 0.0%       | 0.0%           | 0.0%           | 0.0%           | 0.0%           | 0.0% |
| tr F1RK59 F1RK59         | 3             | 0          | 0          | 0              | 0              | 0              | 0              | 3              | 0          | 0          | 0              | 0              | 0              | 0              | 21.4%             | 0.0%       | 0.0%       | 0.0%           | 0.0%           | 0.0%           | 0.0%           | 0.0% |
| tr F1RU69 F1RU69         | 1             | 1          | 0          | 0              | 0              | 0              | 0              | 1              | 2          | 0          | 0              | 0              | 0              | 0              | 0.7%              | 1.5%       | 0.0%       | 0.0%           | 0.0%           | 0.0%           | 0.0%           | 0.0% |
| tr F1SPG1 F1SPG1         | 2             | 1          | 0          | 0              | 0              | 0              | 0              | 2              | 1          | 0          | 0              | 0              | 0              | 0              | 10.7%             | 5.6%       | 0.0%       | 0.0%           | 0.0%           | 0.0%           | 0.0%           | 0.0% |
| tr F1S9Z9 F1S9Z9         | 1             | 1          | 0          | 0              | 0              | 0              | 0              | 1              | 2          | 0          | 0              | 0              | 0              | 0              | 2.4%              | 1.7%       | 0.0%       | 0.0%           | 0.0%           | 0.0%           | 0.0%           | 0.0% |
| tr I3LDE9 I3LDE9         | 1             | 1          | 0          | 0              | 0              | 0              | 0              | 1              | 2          | 0          | 0              | 0              | 0              | 0              | 5.5%              | 3.7%       | 0.0%       | 0.0%           | 0.0%           | 0.0%           | 0.0%           | 0.0% |
| tr K7GRL4 K7GRL4         | 0             | 1          | 0          | 0              | 0              | 0              | 0              | 0              | 3          | 0          | 0              | 0              | 0              | 0              | 0.0%              | 0.7%       | 0.0%       | 0.0%           | 0.0%           | 0.0%           | 0.0%           | 0.0% |
| tr I3LHN2 I3LHN2         | 1             | 1          | 0          | 0              | 0              | 0              | 0              | 1              | 2          | 0          | 0              | 0              | 0              | 0              | 0.7%              | 0.7%       | 0.0%       | 0.0%           | 0.0%           | 0.0%           | 0.0%           | 0.0% |
| P80171                   | 2             | 0          | 0          | 0              | 0              | 0              | 0              | 3              | 0          | 0          | 0              | 0              | 0              | 0              | 33.3%             | 0.0%       | 0.0%       | 0.0%           | 0.0%           | 0.0%           | 0.0%           | 0.0% |
| tr F1SNI1 F1SNI1         | 1             | 2          | 0          | 0              | 0              | 0              | 0              | 1              | 2          | 0          | 0              | 0              | 0              | 0              | 2.0%              | 4.9%       | 0.0%       | 0.0%           | 0.0%           | 0.0%           | 0.0%           | 0.0% |
| tr F6Q023 F6Q023         | 1             | 1          | 0          | 0              | 0              | 0              | 0              | 1              | 2          | 0          | 0              | 0              | 0              | 0              | 3.4%              | 3.4%       | 0.0%       | 0.0%           | 0.0%           | 0.0%           | 0.0%           | 0.0% |
| tr I3LIU1 I3LIU1         | 2             | 0          | 0          | 0              | 0              | 0              | 0              | 3              | 0          | 0          | 0              | 0              | 0              | 0              | 21.7%             | 0.0%       | 0.0%       | 0.0%           | 0.0%           | 0.0%           | 0.0%           | 0.0% |
| tr I3L6R1 I3L6R1         | 2             | 0          | 0          | 0              | 0              | 0              | 0              | 3              | 0          | 0          | 0              | 0              | 0              | 0              | 34.9%             | 0.0%       | 0.0%       | 0.0%           | 0.0%           | 0.0%           | 0.0%           | 0.0% |
| tr F1RUJ3 F1RUJ3         | 2             | 0          | 0          | 0              | 0              | 0              | 0              | 3              | 0          | 0          | 0              | 0              | 0              | 0              | 7.6%              | 0.0%       | 0.0%       | 0.0%           | 0.0%           | 0.0%           | 0.0%           | 0.0% |
| tr I3LCC6 I3LCC6         | 1             | 0          | 0          | 0              | 0              | 0              | 0              | 3              | 0          | 0          | 0              | 0              | 0              | 0              | 22.4%             | 0.0%       | 0.0%       | 0.0%           | 0.0%           | 0.0%           | 0.0%           | 0.0% |
| tr K7GMZ0 K7GMZ0         | 1             | 1          | 0          | 0              | 0              | 0              | 0              | 1              | 2          | 0          | 0              | 0              | 0              | 0              | 9.2%              | 3.5%       | 0.0%       | 0.0%           | 0.0%           | 0.0%           | 0.0%           | 0.0% |
| tr I3LDC9 I3LDC9         | 0             | 1          | 0          | 0              | 0              | 0              | 0              | 0              | 3          | 0          | 0              | 0              | 0              | 0              | 0.0%              | 5.2%       | 0.0%       | 0.0%           | 0.0%           | 0.0%           | 0.0%           | 0.0% |
| tr F1SND5 F1SND5         | 0             | 1          | 0          | 0              | 0              | 0              | 0              | 0              | 3          | 0          | 0              | 0              | 0              | 0              | 0.0%              | 3.6%       | 0.0%       | 0.0%           | 0.0%           | 0.0%           | 0.0%           | 0.0% |
| tr F1SKG2 F1SKG2         | 0             | 2          | 0          | 0              | 0              | 0              | 0              | 0              | 3          | 0          | 0              | 0              | 0              | 0              | 0.0%              | 0.6%       | 0.0%       | 0.0%           | 0.0%           | 0.0%           | 0.0%           | 0.0% |
| tr F1SB92 F1SB92         | 0             | 1          | 0          | 0              | 0              | 0              | 0              | 0              | 3          | 0          | 0              | 0              | 0              | 0              | 0.0%              | 8.8%       | 0.0%       | 0.0%           | 0.0%           | 0.0%           | 0.0%           | 0.0% |
| tr F1SKY0 F1SKY0         | 0             | 1          | 0          | 0              | 0              | 0              | 0              | 0              | 3          | 0          | 0              | 0              | 0              | 0              | 0.0%              | 3.7%       | 0.0%       | 0.0%           | 0.0%           | 0.0%           | 0.0%           | 0.0% |
| O19175                   | 0             | 1          | 0          | 0              | 0              | 0              | 0              | 0              | 3          | 0          | 0              | 0              | 0              | 0              | 0.0%              | 8.0%       | 0.0%       | 0.0%           | 0.0%           | 0.0%           | 0.0%           | 0.0% |
| tr K7GQV1 K7GQV1         | 1             | 0          | 0          | 0              | 0              | 0              | 0              | 3              | 0          | 0          | 0              | 0              | 0              | 0              | 10.7%             | 0.0%       | 0.0%       | 0.0%           | 0.0%           | 0.0%           | 0.0%           | 0.0% |
| tr F1S5K0 F1S5K0         | 2             | 0          | 0          | 0              | 0              | 0              | 0              | 3              | 0          | 0          | 0              | 0              | 0              | 0              | 7.7%              | 0.0%       | 0.0%       | 0.0%           | 0.0%           | 0.0%           | 0.0%           | 0.0% |
| tr I3LI64 I3LI64         | 2             | 0          | 0          | 0              | 0              | 0              | 0              | 3              | 0          | 0          | 0              | 0              | 0              | 0              | 47.8%             | 0.0%       | 0.0%       | 0.0%           | 0.0%           | 0.0%           | 0.0%           | 0.0% |
| tr I3LFL3 I3LFL3         | 1             | 1          | 0          | 0              | 0              | 0              | 0              | 1              | 2          | 0          | 0              | 0              | 0              | 0              | 8.6%              | 5.9%       | 0.0%       | 0.0%           | 0.0%           | 0.0%           | 0.0%           | 0.0% |
| tr F1RK50 F1RK50         | 2             | 0          | 0          | 0              | 0              | 0              | 0              | 3              | 0          | 0          | 0              | 0              | 0              | 0              | 29.8%             | 0.0%       | 0.0%       | 0.0%           | 0.0%           | 0.0%           | 0.0%           | 0.0% |
| tr I3L8N0 I3L8N0         | 0             | 1          | 0          | 0              | 0              | 0              | 0              | 0              | 3          | 0          | 0              | 0              | 0              | 0              | 0.0%              | 3.1%       | 0.0%       | 0.0%           | 0.0%           | 0.0%           | 0.0%           | 0.0% |
| tr I3LK72 I3LK72         | 2             | 0          | 0          | 0              | 0              | 0              | 0              | 3              | 0          | 0          | 0              | 0              | 0              | 0              | 7.9%              | 0.0%       | 0.0%       | 0.0%           | 0.0%           | 0.0%           | 0.0%           | 0.0% |
| tr F1RVA6 F1RVA6         | 0             | 2          | 0          | 0              | 0              | 0              | 0              | 0              | 3          | 0          | 0              | 0              | 0              | 0              | 0.0%              | 3.5%       | 0.0%       | 0.0%           | 0.0%           | 0.0%           | 0.0%           | 0.0% |
| tr I3LB43 I3LB43         | 1             | 0          | 0          | 0              | 0              | 0              | 0              | 3              | 0          | 0          | 0              | 0              | 0              | 0              | 21.7%             | 0.0%       | 0.0%       | 0.0%           | 0.0%           | 0.0%           | 0.0%           | 0.0% |
| tr F1SJK5 F1SJK5         | 1             | 1          | 0          | 0              | 0              | 0              | 0              | 1              | 2          | 0          | 0              | 0              | 0              | 0              | 3.9%              | 2.3%       | 0.0%       | 0.0%           | 0.0%           | 0.0%           | 0.0%           | 0.0% |
| tr F1SK34 F1SK34         | 1             | 0          | 0          | 0              | 0              | 0              | 0              | 3              | 0          | 0          | 0              | 0              | 0              | 0              | 9.3%              | 0.0%       | 0.0%       | 0.0%           | 0.0%           | 0.0%           | 0.0%           | 0.0% |
| tr F1RWE3 F1RWE3         | 2             | 1          | 0          | 0              | 0              | 0              | 0              | 2              | 1          | 0          | 0              | 0              | 0              | 0              | 9.1%              | 2.1%       | 0.0%       | 0.0%           | 0.0%           | 0.0%           | 0.0%           | 0.0% |
| tr F1S0L4 F1S0L4         | 2             | 1          | 1          | 0              | 0              | 0              | 0              | 2              | 1          | 1          | 0              | 0              | 0              | 0              | 8.1%              | 2.5%       | 5.2%       | 0.0%           | 0.0%           | 0.0%           | 0.0%           | 0.0% |
| tr F1SDI3 F1SDI3         | 2             | 0          | 1          | 0              | 0              | 0              | 0              | 3              | 0          | 1          | 0              | 0              | 0              | 0              | 10.9%             | 0.0%       | 4.7%       | 0.0%           | 0.0%           | 0.0%           | 0.0%           | 0.0% |
| tr F1SU57 F1SU57         | 2             | 1          | 1          | 0              | 0              | 0              | 0              | 2              | 1          | 1          | 0              | 0              | 0              | 0              | 6.7%              | 4.8%       | 2.3%       | 0.0%           | 0.0%           | 0.0%           | 0.0%           | 0.0% |
| tr F1S187 F1S187         | 1             | 2          | 1          | 0              | 0              | 0              | 0              | 1              | 2          | 1          | 0              | 0              | 0              | 0              | 4.2%              | 4.7%       | 4.4%       | 0.0%           | 0.0%           | 0.0%           | 0.0%           | 0.0% |
| tr F1S540 F1S540         | 3             | 0          | 1          | 0              | 0              | 0              | 0              | 3              | 0          | 1          | 0              | 0              | 0              | 0              | 4.2%              | 0.0%       | 1.4%       | 0.0%           | 0.0%           | 0.0%           | 0.0%           | 0.0% |
| tr I3LT90 I3LT90         | 2             | 1          | 1          | 0              | 0              | 0              | 0              | 2              | 1          | 1          | 0              | 0              | 0              | 0              | 3.6%              | 1.1%       | 1.5%       | 0.0%           | 0.0%           | 0.0%           | 0.0%           | 0.0% |
| tr F1S3N6 F1S3N6         | 3             | 0          | 1          | 0              | 0              | 0              | 0              | 3              | 0          | 1          | 0              | 0              | 0              | 0              | 8.9%              | 0.0%       | 4.2%       | 0.0%           | 0.0%           | 0.0%           | 0.0%           | 0.0% |
|                          |               |            |            |                |                |                |                |                |            |            |                |                |                |                |                   |            |            |                |                |                |                |      |

| Accession        | Sample# | Peptide Count |            |            |                |                |                |                | Spectral Count |            |            |                |                |                |                | Sequence Coverage |            |            |                |                |                |                |      |
|------------------|---------|---------------|------------|------------|----------------|----------------|----------------|----------------|----------------|------------|------------|----------------|----------------|----------------|----------------|-------------------|------------|------------|----------------|----------------|----------------|----------------|------|
|                  |         | Whole Cell    | Whole Cell | Whole Cell | Cilia Fraction | Cilia Fraction | Cilia Fraction | Cilia Fraction | Whole Cell     | Whole Cell | Whole Cell | Cilia Fraction | Cilia Fraction | Cilia Fraction | Cilia Fraction | Whole Cell        | Whole Cell | Whole Cell | Cilia Fraction | Cilia Fraction | Cilia Fraction | Cilia Fraction |      |
|                  |         | 1             | 2          | 6          | 4              | 3              | 5              | 7              | 1              | 2          | 6          | 4              | 3              | 5              | 7              | 1                 | 2          | 6          | 4              | 3              | 5              | 7              | 8    |
| tr K7GNY8 K7GNY8 |         | 2             | 1          | 1          | 0              | 0              | 0              | 0              | 2              | 1          | 1          | 0              | 0              | 0              | 0              | 6.8%              | 4.9%       | 2.3%       | 0.0%           | 0.0%           | 0.0%           | 0.0%           | 0.0% |
| tr F1RFT3 F1RFT3 |         | 1             | 0          | 1          | 0              | 0              | 0              | 0              | 3              | 0          | 1          | 0              | 0              | 0              | 0              | 2.1%              | 0.0%       | 7.9%       | 0.0%           | 0.0%           | 0.0%           | 0.0%           | 0.0% |
| tr I3LQL5 I3LQL5 |         | 1             | 0          | 1          | 0              | 0              | 0              | 0              | 3              | 0          | 1          | 0              | 0              | 0              | 0              | 6.2%              | 0.0%       | 5.5%       | 0.0%           | 0.0%           | 0.0%           | 0.0%           | 0.0% |
| tr I3LEU9 I3LEU9 |         | 1             | 1          | 1          | 0              | 0              | 0              | 0              | 1              | 2          | 1          | 0              | 0              | 0              | 0              | 3.9%              | 1.5%       | 4.1%       | 0.0%           | 0.0%           | 0.0%           | 0.0%           | 0.0% |
| tr F1SH89 F1SH89 |         | 2             | 1          | 1          | 0              | 0              | 0              | 0              | 2              | 1          | 1          | 0              | 0              | 0              | 0              | 5.4%              | 1.7%       | 3.2%       | 0.0%           | 0.0%           | 0.0%           | 0.0%           | 0.0% |
| tr I3LSK0 I3LSK0 |         | 3             | 0          | 1          | 0              | 0              | 0              | 0              | 3              | 0          | 1          | 0              | 0              | 0              | 0              | 2.6%              | 0.0%       | 0.6%       | 0.0%           | 0.0%           | 0.0%           | 0.0%           | 0.0% |
| tr F1RFW9 F1RFW9 |         | 3             | 0          | 1          | 0              | 0              | 0              | 0              | 3              | 0          | 1          | 0              | 0              | 0              | 0              | 7.3%              | 0.0%       | 2.5%       | 0.0%           | 0.0%           | 0.0%           | 0.0%           | 0.0% |
| tr F1SGP8 F1SGP8 |         | 3             | 0          | 1          | 0              | 0              | 0              | 0              | 3              | 0          | 1          | 0              | 0              | 0              | 0              | 16.3%             | 0.0%       | 4.2%       | 0.0%           | 0.0%           | 0.0%           | 0.0%           | 0.0% |
| tr K7GS05 K7GS05 |         | 2             | 1          | 1          | 0              | 0              | 0              | 0              | 2              | 1          | 1          | 0              | 0              | 0              | 0              | 6.7%              | 4.8%       | 2.3%       | 0.0%           | 0.0%           | 0.0%           | 0.0%           | 0.0% |
| tr F1SOA8 F1SOA8 |         | 2             | 0          | 1          | 0              | 0              | 0              | 0              | 3              | 0          | 2          | 0              | 0              | 0              | 0              | 6.0%              | 0.0%       | 5.6%       | 0.0%           | 0.0%           | 0.0%           | 0.0%           | 0.0% |
| tr I3LHV8 I3LHV8 |         | 3             | 0          | 1          | 0              | 0              | 0              | 0              | 3              | 0          | 2          | 0              | 0              | 0              | 0              | 11.9%             | 0.0%       | 3.0%       | 0.0%           | 0.0%           | 0.0%           | 0.0%           | 0.0% |
| tr F1SV23 F1SV23 |         | 2             | 0          | 1          | 0              | 0              | 0              | 0              | 3              | 0          | 2          | 0              | 0              | 0              | 0              | 29.2%             | 0.0%       | 12.3%      | 0.0%           | 0.0%           | 0.0%           | 0.0%           | 0.0% |
| tr F1SCS0 F1SCS0 |         | 2             | 0          | 1          | 0              | 0              | 0              | 0              | 3              | 0          | 2          | 0              | 0              | 0              | 0              | 7.0%              | 0.0%       | 4.4%       | 0.0%           | 0.0%           | 0.0%           | 0.0%           | 0.0% |
| tr I3LSE4 I3LSE4 |         | 1             | 1          | 1          | 0              | 0              | 0              | 0              | 2              | 1          | 2          | 0              | 0              | 0              | 0              | 3.8%              | 3.8%       | 4.7%       | 0.0%           | 0.0%           | 0.0%           | 0.0%           | 0.0% |
| tr F1S8W1 F1S8W1 |         | 2             | 0          | 1          | 0              | 0              | 0              | 0              | 3              | 0          | 2          | 0              | 0              | 0              | 0              | 8.0%              | 0.0%       | 3.4%       | 0.0%           | 0.0%           | 0.0%           | 0.0%           | 0.0% |
| tr I3LGM4 I3LGM4 |         | 1             | 2          | 2          | 0              | 0              | 0              | 0              | 1              | 2          | 2          | 0              | 0              | 0              | 0              | 24.1%             | 30.5%      | 19.9%      | 0.0%           | 0.0%           | 0.0%           | 0.0%           | 0.0% |
| tr I3LGT7 I3LGT7 |         | 2             | 0          | 1          | 0              | 0              | 0              | 0              | 3              | 0          | 2          | 0              | 0              | 0              | 0              | 14.0%             | 0.0%       | 7.0%       | 0.0%           | 0.0%           | 0.0%           | 0.0%           | 0.0% |
| tr F1SUZ4 F1SUZ4 |         | 1             | 1          | 2          | 0              | 0              | 0              | 0              | 1              | 2          | 3          | 0              | 0              | 0              | 0              | 1.8%              | 2.3%       | 5.1%       | 0.0%           | 0.0%           | 0.0%           | 0.0%           | 0.0% |
| Q09136           |         | 3             | 0          | 1          | 0              | 0              | 0              | 0              | 3              | 0          | 3          | 0              | 0              | 0              | 0              | 14.3%             | 0.0%       | 2.6%       | 0.0%           | 0.0%           | 0.0%           | 0.0%           | 0.0% |
| tr F1RWY9 F1RWY9 |         | 3             | 0          | 2          | 0              | 0              | 0              | 0              | 3              | 0          | 3          | 0              | 0              | 0              | 0              | 33.3%             | 0.0%       | 32.5%      | 0.0%           | 0.0%           | 0.0%           | 0.0%           | 0.0% |
| tr I3LNP5 I3LNP5 |         | 1             | 0          | 1          | 0              | 0              | 0              | 0              | 3              | 0          | 3          | 0              | 0              | 0              | 0              | 8.1%              | 0.0%       | 13.3%      | 0.0%           | 0.0%           | 0.0%           | 0.0%           | 0.0% |
| tr F1RUW0 F1RUW0 |         | 1             | 1          | 2          | 0              | 0              | 0              | 0              | 2              | 1          | 3          | 0              | 0              | 0              | 0              | 2.5%              | 2.5%       | 5.1%       | 0.0%           | 0.0%           | 0.0%           | 0.0%           | 0.0% |
| tr I3LKE2 I3LKE2 |         | 2             | 1          | 1          | 0              | 0              | 0              | 0              | 2              | 1          | 3          | 0              | 0              | 0              | 0              | 9.9%              | 7.1%       | 3.5%       | 0.0%           | 0.0%           | 0.0%           | 0.0%           | 0.0% |
| tr F1SIU9 F1SIU9 |         | 2             | 1          | 1          | 0              | 0              | 0              | 0              | 2              | 1          | 3          | 0              | 0              | 0              | 0              | 9.0%              | 6.4%       | 3.2%       | 0.0%           | 0.0%           | 0.0%           | 0.0%           | 0.0% |
| tr F1RYV6 F1RYV6 |         | 2             | 0          | 1          | 0              | 0              | 0              | 0              | 3              | 0          | 3          | 0              | 0              | 0              | 0              | 5.6%              | 0.0%       | 3.1%       | 0.0%           | 0.0%           | 0.0%           | 0.0%           | 0.0% |
| tr F1SFI3 F1SFI3 |         | 1             | 2          | 1          | 0              | 0              | 0              | 0              | 1              | 2          | 4          | 0              | 0              | 0              | 0              | 3.3%              | 6.6%       | 5.5%       | 0.0%           | 0.0%           | 0.0%           | 0.0%           | 0.0% |
| tr I3L752 I3L752 |         | 2             | 0          | 1          | 0              | 0              | 0              | 0              | 3              | 0          | 4          | 0              | 0              | 0              | 0              | 5.8%              | 0.0%       | 2.7%       | 0.0%           | 0.0%           | 0.0%           | 0.0%           | 0.0% |
| tr F1S2R7 F1S2R7 |         | 1             | 1          | 1          | 0              | 0              | 0              | 0              | 2              | 1          | 4          | 0              | 0              | 0              | 0              | 5.1%              | 3.7%       | 5.1%       | 0.0%           | 0.0%           | 0.0%           | 0.0%           | 0.0% |
| tr F1RXX6 F1RXX6 |         | 2             | 1          | 1          | 0              | 0              | 0              | 0              | 2              | 1          | 4          | 0              | 0              | 0              | 0              | 13.3%             | 10.4%      | 7.6%       | 0.0%           | 0.0%           | 0.0%           | 0.0%           | 0.0% |
| tr F1SV67 F1SV67 |         | 3             | 0          | 2          | 0              | 0              | 0              | 0              | 3              | 0          | 4          | 0              | 0              | 0              | 0              | 17.4%             | 0.0%       | 8.7%       | 0.0%           | 0.0%           | 0.0%           | 0.0%           | 0.0% |
| tr I3L7I5 I3L7I5 |         | 3             | 0          | 2          | 0              | 0              | 0              | 0              | 3              | 0          | 4          | 0              | 0              | 0              | 0              | 8.2%              | 0.0%       | 5.8%       | 0.0%           | 0.0%           | 0.0%           | 0.0%           | 0.0% |
| Q29259           |         | 1             | 1          | 1          | 0              | 0              | 0              | 0              | 2              | 1          | 4          | 0              | 0              | 0              | 0              | 8.6%              | 8.6%       | 7.8%       | 0.0%           | 0.0%           | 0.0%           | 0.0%           | 0.0% |
| tr I3LL98 I3LL98 |         | 3             | 0          | 1          | 0              | 0              | 0              | 0              | 3              | 0          | 5          | 0              | 0              | 0              | 0              | 15.9%             | 0.0%       | 5.3%       | 0.0%           | 0.0%           | 0.0%           | 0.0%           | 0.0% |
| tr F1S8V3 F1S8V3 |         | 2             | 0          | 1          | 0              | 0              | 0              | 0              | 3              | 0          | 5          | 0              | 0              | 0              | 0              | 3.3%              | 0.0%       | 3.7%       | 0.0%           | 0.0%           | 0.0%           | 0.0%           | 0.0% |
| tr D2WL17 D2WL17 |         | 3             | 0          | 1          | 0              | 0              | 0              | 0              | 3              | 0          | 5          | 0              | 0              | 0              | 0              | 12.5%             | 0.0%       | 3.2%       | 0.0%           | 0.0%           | 0.0%           | 0.0%           | 0.0% |
| tr F1RJQ9 F1RJQ9 |         | 1             | 1          | 1          | 0              | 0              | 0              | 0              | 2              | 1          | 5          | 0              | 0              | 0              | 0              | 14.0%             | 14.0%      | 14.0%      | 0.0%           | 0.0%           | 0.0%           | 0.0%           | 0.0% |
| tr I3L6K0 I3L6K0 |         | 2             | 0          | 1          | 0              | 0              | 0              | 0              | 3              | 0          | 5          | 0              | 0              | 0              | 0              | 8.9%              | 0.0%       | 6.4%       | 0.0%           | 0.0%           | 0.0%           | 0.0%           | 0.0% |
| tr I3LDM2 I3LDM2 |         | 2             | 0          | 1          | 0              | 0              | 0              | 0              | 3              | 0          | 5          | 0              | 0              | 0              | 0              | 9.2%              | 0.0%       | 6.6%       | 0.0%           | 0.0%           | 0.0%           | 0.0%           | 0.0% |
| tr F1RPK5 F1RPK5 |         | 3             | 0          | 2          | 0              | 0              | 0              | 0              | 3              | 0          | 5          | 0              | 0              | 0              | 0              | 23.7%             | 0.0%       | 17.1%      | 0.0%           | 0.0%           | 0.0%           | 0.0%           | 0.0% |
| tr I3LIC9 I3LIC9 |         | 2             | 0          | 1          | 0              | 0              | 0              | 0              | 3              | 0          | 5          | 0              | 0              | 0              | 0              | 9.0%              | 0.0%       | 6.5%       | 0.0%           | 0.0%           | 0.0%           | 0.0%           | 0.0% |
| tr F2Z5J6 F2Z5J6 |         | 1             | 0          | 2          | 0              | 0              | 0              | 0              | 3              | 0          | 6          | 0              | 0              | 0              | 0              | 6.6%              | 0.0%       | 5.1%       | 0.0%           | 0.0%           | 0.0%           | 0.0%           | 0.0% |
| tr I3LB10 I3LB10 |         | 1             | 1          | 2          | 0              | 0              | 0              | 0              | 2              | 1          | 6          | 0              | 0              | 0              | 0              | 2.0%              | 1.1%       | 3.6%       | 0.0%           | 0.0%           | 0.0%           | 0.0%           | 0.0% |
| tr I3LDL8 I3LDL8 |         | 1             | 0          | 2          | 0              | 0              | 0              | 0              | 3              | 0          | 6          | 0              | 0              | 0              | 0              | 4.6%              | 0.0%       | 5.0%       | 0.0%           | 0.0%           | 0.0%           | 0.0%           | 0.0% |
| tr F1S2Z9 F1S2Z9 |         | 2             | 0          | 2          | 0              | 0              | 0              | 0              | 3              | 0          | 6          | 0              | 0              | 0              | 0              | 8.4%              | 0.0%       | 7.9%       | 0.0%           | 0.0%           | 0.0%           | 0.0%           | 0.0% |
| tr K7GQ75 K7GQ75 |         | 1             | 0          | 1          | 0              | 0              | 0              | 0              | 3              | 0          | 6          | 0              | 0              | 0              | 0              | 24.8%             | 0.0%       | 5.6%       | 0.0%           | 0.0%           | 0.0%           | 0.0%           | 0.0% |
| tr I3LP62 I3LP62 |         | 2             | 0          | 1          | 0              | 0              | 0              | 0              | 3              | 0          | 6          | 0              | 0              | 0              | 0              | 11.5%             | 0.0%       | 13.9%      | 0.0%           | 0.0%           | 0.0%           | 0.0%           | 0.0% |
| tr F1SM98 F1SM98 |         | 3             | 0          | 2          | 0              | 0              | 0              | 0              | 3              | 0          | 6          | 0              | 0              | 0              | 0              | 10.4%             | 0.0%       | 8.0%       | 0.0%           | 0.0%           | 0.0%           | 0.0%           | 0.0% |
| tr K7GMV9 K7GMV9 |         | 2             | 0          | 1          | 0              | 0              | 0              | 0              | 3              | 0          | 7          | 0              | 0              | 0              | 0              | 18.6%             | 0.0%       | 5.1%       | 0.0%           | 0.0%           | 0.0%           | 0.0%           | 0.0% |
| tr F1S1V5 F1S1V5 |         | 2             | 0          | 2          | 0              | 0              | 0              | 0              | 3              | 0          | 7          | 0              | 0              | 0              | 0              | 1.6%              | 0.0%       | 2.4%       | 0.0%           | 0.0%           | 0.0%           | 0.0%           | 0.0% |
| tr F1SL16 F1SL16 |         | 1             | 2          | 2          | 0              | 0              | 0              | 0              | 1              | 2          | 7          | 0              | 0              | 0              | 0              | 8.4%              | 10.7%      | 17.4%      | 0.0%           | 0.0%           | 0.0%           | 0.0%           | 0.0% |
| tr F1S9H9 F1S9H9 |         | 1             | 1          | 3          | 0              | 0              | 0              | 0              | 2              | 1          | 7          | 0              | 0              | 0              | 0              | 14.9%             | 8.8%       | 23.6%      | 0.0%           | 0.0%           | 0.0%           | 0.0%           | 0.0% |
| tr F1RRY6 F1RRY6 |         | 2             | 1          | 2          | 0              | 0              | 0              | 0              | 2              | 1          | 7          | 0              | 0              | 0              | 0              | 12.1%             | 2.4%       | 8.7%       | 0.0%           | 0.0%           | 0.0%           | 0.0%           | 0.0% |
| tr I3LG77 I3LG77 |         | 2             | 0          | 1          | 0              | 0              | 0              | 0              | 3              | 0          | 7          | 0              | 0              | 0              | 0              | 17.9%             | 0.0%       | 4.9%       | 0.0%           | 0.0%           | 0.0%           | 0.0%           | 0.0% |
| tr K7GM22 K7GM22 |         | 2             | 1          | 4          | 0              | 0              | 0              | 0              | 2              | 1          | 8          | 0              | 0              | 0              | 0              | 10.4%             | 9.9%       | 14.4%      | 0.0%           | 0.0%           | 0.0%           | 0.0%           | 0.0% |
| tr F1SLY2 F1SLY2 |         | 1             | 0          | 1          | 0              | 0              | 0              | 0              | 3              | 0          | 8          | 0              | 0              | 0              | 0              | 22.4%             | 0.0%       | 13.8%      | 0.0%           | 0.0%           | 0.0%           | 0.0%           | 0.0% |
| tr F1SGT3 F1SGT3 |         | 1             | 1          | 2          | 0              | 0              | 0              | 0              | 1              | 2          | 8          | 0              | 0              | 0              | 0              | 2.8%              | 3.0%       | 4.8%       | 0.0%           | 0.0%           | 0.0%           | 0.0%           | 0.0% |
| P56472           |         | 1             | 0          | 1          | 0              | 0              | 0              | 0              | 3              | 0          | 8          | 0              | 0              | 0              | 0              | 19.4%             | 0.0%       | 18.4%      | 0.0%           | 0.0%           | 0.0%           | 0.0%           | 0.0% |
| tr F1RW55 F1RW55 |         | 2             | 0          | 1          | 0              | 0              | 0              | 0              | 3              | 0          | 9          | 0              | 0              | 0              | 0              | 10.7%             | 0.0%       | 10.1%      | 0.0%           | 0.0%           | 0.0%           | 0.0%           | 0.0% |
| tr F2Z5G2 F2Z5G2 |         | 3             | 0          | 3          | 0              | 0              | 0              | 0              | 3              | 0          | 9          | 0              | 0              | 0              | 0              | 3.9%              | 0.0%       | 4.9%       | 0.0%           | 0.0%           | 0.0%           | 0.0%           | 0.0% |
| tr K7GRQ4 K7GRQ4 |         | 2             | 0          | 1          | 0              | 0              | 0              | 0              | 3              | 0          | 9          | 0              | 0              | 0              | 0              | 14.2%             | 0.0%       | 13.4%      | 0.0%           | 0.0%           | 0.0%           | 0.0%           | 0.0% |
| tr F1SAU5 F1SAU5 |         | 2             | 1          | 2          | 0              | 0              | 0              | 0              | 2              | 1          | 10         | 0              | 0              | 0              | 0              | 3.4%              | 1.4%       | 3.7%       | 0.0%           | 0.0%           | 0.0%           | 0.0%           | 0.0% |
| tr F1STI9 F1STI9 |         | 3             | 0          | 2          | 0              | 0              | 0              | 0              | 3              | 0          | 11         | 0              | 0              | 0              | 0              | 7.2%              | 0.0%       | 4.4%       | 0.0%           | 0.0%           | 0.0%           | 0.0%           | 0.0% |
| tr F1SKU5 F1SKU5 |         | 2             | 1          | 2          | 0              | 0              | 0              | 0              | 2              | 1          | 11         | 0              | 0              | 0              | 0              | 6.4%              | 1.6%       | 3.4%       | 0.0%           | 0.0%           | 0.0%           | 0.0%           | 0.0% |
| tr F1S8V6 F1S8V6 |         | 2             | 0          | 2          | 0              | 0              | 0              | 0              | 3              | 0          | 12         | 0              | 0              | 0              | 0              | 3.0%              | 0.0%       | 6.5%       | 0.0%           | 0.0%           | 0.0%           | 0.0%           | 0.0% |
| tr F1STP1 F1STP1 |         | 2             | 0          | 3          | 0              | 0              | 0              | 0              | 3              | 0          | 12         | 0              | 0              | 0              | 0              | 15.0%             | 0.0%       | 21.4%      | 0.0%           | 0.0%           | 0.0%           | 0.0%           | 0.0% |
| tr F1SGH9 F1SGH9 |         | 0             | 1          | 2          | 0              | 0              | 0              | 0              | 0              | 3          | 12         | 0              | 0              | 0              | 0              | 0.0%              | 1.5%       | 5.9%       | 0.0%           | 0.0%           | 0.0%           | 0.0%           | 0.0% |
| tr F1RGP6 F1RGP6 |         | 2             | 0          | 3          | 0              | 0              | 0              | 0              | 3              | 0          | 12         | 0              | 0              | 0              | 0              | 4.9%              | 0.0%       | 8.3%       | 0.0%           | 0.0%           | 0.0%           | 0.0%           | 0.0% |
| tr K7GPA0 K7GPA0 |         |               |            |            |                |                |                |                |                |            |            |                |                |                |                |                   |            |            |                |                |                |                |      |

| Accession        | Sample# | Peptide Count |            |            |                |                |                |                | Spectral Count |            |            |                |                |                |                |                | Sequence Coverage |            |            |                |                |                |                |                |       |
|------------------|---------|---------------|------------|------------|----------------|----------------|----------------|----------------|----------------|------------|------------|----------------|----------------|----------------|----------------|----------------|-------------------|------------|------------|----------------|----------------|----------------|----------------|----------------|-------|
|                  |         | Whole Cell    | Whole Cell | Whole Cell | Cilia Fraction | Cilia Fraction | Cilia Fraction | Cilia Fraction | Whole Cell     | Whole Cell | Whole Cell | Cilia Fraction | Whole Cell        | Whole Cell | Whole Cell | Cilia Fraction |       |
|                  |         | 1             | 2          | 6          | 4              | 3              | 5              | 7              | 8              | 1          | 2          | 6              | 4              | 3              | 5              | 7              | 8                 | 1          | 2          | 6              | 4              | 3              | 5              | 7              | 8     |
| tr F1SIC6 F1SIC6 |         | 1             | 1          | 0          | 0              | 0              | 0              | 2              | 4              | 1          | 1          | 0              | 0              | 0              | 0              | 7              | 14                | 3.4%       | 8.2%       | 0.0%           | 0.0%           | 0.0%           | 0.0%           | 8.2%           | 30.9% |
| O02713           |         | 2             | 0          | 2          | 0              | 0              | 0              | 2              | 7              | 2          | 0          | 10             | 0              | 0              | 0              | 40             | 76                | 1.8%       | 0.0%       | 3.2%           | 0.0%           | 0.0%           | 0.0%           | 7.6%           | 15.0% |
| tr F1SB79 F1SB79 |         | 2             | 0          | 2          | 0              | 0              | 0              | 2              | 7              | 2          | 0          | 10             | 0              | 0              | 0              | 40             | 76                | 1.8%       | 0.0%       | 3.2%           | 0.0%           | 0.0%           | 0.0%           | 7.6%           | 15.0% |
| tr F1RFB4 F1RFB4 |         | 2             | 0          | 1          | 0              | 0              | 0              | 2              | 3              | 2          | 0          | 1              | 0              | 0              | 0              | 14             | 15                | 9.9%       | 0.0%       | 5.4%           | 0.0%           | 0.0%           | 0.0%           | 9.6%           | 14.3% |
| tr I3LGD9 I3LGD9 |         | 1             | 1          | 1          | 0              | 0              | 0              | 2              | 6              | 1          | 1          | 1              | 0              | 0              | 0              | 7              | 19                | 0.6%       | 0.6%       | 0.9%           | 0.0%           | 0.0%           | 0.0%           | 1.1%           | 3.7%  |
| tr I3LIZ3 I3LIZ3 |         | 1             | 1          | 0          | 0              | 0              | 0              | 2              | 2              | 1          | 1          | 0              | 0              | 0              | 0              | 7              | 9                 | 7.3%       | 17.5%      | 0.0%           | 0.0%           | 0.0%           | 0.0%           | 17.5%          | 24.8% |
| Q29000           |         | 2             | 0          | 1          | 0              | 0              | 0              | 1              | 4              | 2          | 0          | 2              | 0              | 0              | 0              | 6              | 23                | 10.9%      | 0.0%       | 8.9%           | 0.0%           | 0.0%           | 0.0%           | 5.6%           | 31.6% |
| tr F1SSM0 F1SSM0 |         | 2             | 0          | 0          | 0              | 0              | 0              | 0              | 4              | 2          | 0          | 0              | 0              | 0              | 0              | 0              | 13                | 6.6%       | 0.0%       | 0.0%           | 0.0%           | 0.0%           | 0.0%           | 0.0%           | 15.3% |
| tr F1RLC9 F1RLC9 |         | 2             | 0          | 0          | 0              | 0              | 0              | 1              | 1              | 2          | 0          | 0              | 0              | 0              | 0              | 9              | 1                 | 10.6%      | 0.0%       | 0.0%           | 0.0%           | 0.0%           | 0.0%           | 10.6%          | 10.6% |
| tr I3LQ16 I3LQ16 |         | 2             | 0          | 1          | 0              | 0              | 0              | 1              | 1              | 2          | 0          | 1              | 0              | 0              | 0              | 7              | 5                 | 36.1%      | 0.0%       | 16.7%          | 0.0%           | 0.0%           | 0.0%           | 16.7%          | 16.7% |
| tr I3LTB8 I3LTB8 |         | 1             | 0          | 0          | 0              | 0              | 0              | 1              | 1              | 2          | 0          | 0              | 0              | 0              | 0              | 3              | 5                 | 4.6%       | 0.0%       | 0.0%           | 0.0%           | 0.0%           | 0.0%           | 4.6%           | 4.6%  |
| tr F1SV97 F1SV97 |         | 2             | 0          | 0          | 0              | 0              | 0              | 0              | 3              | 2          | 0          | 0              | 0              | 0              | 0              | 0              | 8                 | 25.7%      | 0.0%       | 0.0%           | 0.0%           | 0.0%           | 0.0%           | 0.0%           | 25.7% |
| tr F1RRH2 F1RRH2 |         | 2             | 0          | 0          | 0              | 0              | 0              | 0              | 0              | 2          | 0          | 0              | 0              | 0              | 0              | 0              | 7                 | 3.8%       | 0.0%       | 0.0%           | 0.0%           | 0.0%           | 0.0%           | 0.0%           | 5.6%  |
| tr I3LHE6 I3LHE6 |         | 2             | 0          | 0          | 0              | 0              | 0              | 0              | 2              | 2          | 0          | 0              | 0              | 0              | 0              | 0              | 0                 | 6.3%       | 0.0%       | 0.0%           | 0.0%           | 0.0%           | 0.0%           | 0.0%           | 3.3%  |
| tr F2Z5H6 F2Z5H6 |         | 2             | 0          | 2          | 0              | 0              | 0              | 1              | 3              | 2          | 0          | 9              | 0              | 0              | 0              | 2              | 30                | 10.3%      | 0.0%       | 5.1%           | 0.0%           | 0.0%           | 0.0%           | 5.1%           | 20.8% |
| tr F1SPU7 F1SPU7 |         | 1             | 0          | 0          | 0              | 0              | 0              | 0              | 3              | 2          | 0          | 0              | 0              | 0              | 0              | 0              | 5                 | 2.1%       | 0.0%       | 0.0%           | 0.0%           | 0.0%           | 0.0%           | 0.0%           | 7.8%  |
| Q5GN48           |         | 1             | 0          | 0          | 0              | 0              | 0              | 0              | 3              | 2          | 0          | 0              | 0              | 0              | 0              | 0              | 5                 | 0.4%       | 0.0%       | 0.0%           | 0.0%           | 0.0%           | 0.0%           | 0.0%           | 1.4%  |
| tr F1RPY5 F1RPY5 |         | 1             | 1          | 0          | 0              | 0              | 0              | 1              | 0              | 1          | 1          | 0              | 0              | 0              | 0              | 5              | 0                 | 5.7%       | 2.7%       | 0.0%           | 0.0%           | 0.0%           | 0.0%           | 2.7%           | 0.0%  |
| tr F1RQ24 F1RQ24 |         | 2             | 0          | 0          | 0              | 0              | 0              | 0              | 2              | 2          | 0          | 0              | 0              | 0              | 0              | 0              | 5                 | 10.4%      | 0.0%       | 0.0%           | 0.0%           | 0.0%           | 0.0%           | 0.0%           | 10.4% |
| tr I3LGE5 I3LGE5 |         | 2             | 0          | 5          | 0              | 0              | 0              | 1              | 10             | 2          | 0          | 20             | 0              | 0              | 0              | 10             | 41                | 3.0%       | 0.0%       | 10.7%          | 0.0%           | 0.0%           | 0.0%           | 1.6%           | 16.4% |
| tr F1RSA2 F1RSA2 |         | 1             | 1          | 0          | 0              | 0              | 0              | 0              | 1              | 1          | 1          | 0              | 0              | 0              | 0              | 0              | 4                 | 1.1%       | 1.2%       | 0.0%           | 0.0%           | 0.0%           | 0.0%           | 0.0%           | 3.4%  |
| tr F1SF12 F1SF12 |         | 0             | 2          | 0          | 0              | 0              | 0              | 1              | 0              | 0          | 2          | 0              | 0              | 0              | 0              | 4              | 0                 | 0.0%       | 14.3%      | 0.0%           | 0.0%           | 0.0%           | 0.0%           | 10.9%          | 0.0%  |
| tr F1S3T8 F1S3T8 |         | 1             | 0          | 0          | 0              | 0              | 0              | 0              | 1              | 2          | 0          | 0              | 0              | 0              | 0              | 0              | 4                 | 14.8%      | 0.0%       | 0.0%           | 0.0%           | 0.0%           | 0.0%           | 0.0%           | 14.8% |
| tr F1S614 F1S614 |         | 1             | 1          | 0          | 0              | 0              | 0              | 1              | 1              | 1          | 1          | 0              | 0              | 0              | 0              | 1              | 3                 | 2.5%       | 2.0%       | 0.0%           | 0.0%           | 0.0%           | 0.0%           | 2.0%           | 2.5%  |
| tr I3L804 I3L804 |         | 2             | 0          | 1          | 0              | 0              | 0              | 0              | 9              | 2          | 0          | 14             | 0              | 0              | 0              | 0              | 30                | 2.3%       | 0.0%       | 1.7%           | 0.0%           | 0.0%           | 0.0%           | 0.0%           | 10.0% |
| tr F1S6Z8 F1S6Z8 |         | 1             | 1          | 1          | 0              | 0              | 0              | 1              | 1              | 1          | 1          | 3              | 0              | 0              | 0              | 8              | 1                 | 9.8%       | 9.8%       | 4.1%           | 0.0%           | 0.0%           | 0.0%           | 9.8%           | 9.8%  |
| tr F1SQ70 F1SQ70 |         | 2             | 0          | 2          | 0              | 0              | 0              | 1              | 1              | 2          | 0          | 12             | 0              | 0              | 0              | 20             | 5                 | 35.5%      | 0.0%       | 20.6%          | 0.0%           | 0.0%           | 0.0%           | 20.6%          | 20.6% |
| tr I3LOP2 I3LOP2 |         | 2             | 0          | 4          | 0              | 0              | 0              | 0              | 4              | 2          | 0          | 12             | 0              | 0              | 0              | 0              | 24                | 5.8%       | 0.0%       | 13.9%          | 0.0%           | 0.0%           | 0.0%           | 0.0%           | 14.2% |
| tr F1SK02 F1SK02 |         | 0             | 2          | 1          | 0              | 0              | 0              | 0              | 1              | 0          | 2          | 1              | 0              | 0              | 0              | 0              | 5                 | 0.0%       | 9.7%       | 5.8%           | 0.0%           | 0.0%           | 0.0%           | 0.0%           | 11.9% |
| tr I3LU94 I3LU94 |         | 1             | 0          | 3          | 0              | 0              | 0              | 1              | 1              | 2          | 0          | 6              | 0              | 0              | 0              | 10             | 3                 | 14.1%      | 0.0%       | 14.7%          | 0.0%           | 0.0%           | 0.0%           | 12.5%          | 12.5% |
| tr F1RM44 F1RM44 |         | 2             | 0          | 0          | 0              | 0              | 0              | 0              | 2              | 2          | 0          | 0              | 0              | 0              | 0              | 0              | 3                 | 15.6%      | 0.0%       | 0.0%           | 0.0%           | 0.0%           | 0.0%           | 0.0%           | 15.6% |
| tr I3LPH8 I3LPH8 |         | 1             | 0          | 0          | 0              | 0              | 0              | 0              | 2              | 2          | 0          | 0              | 0              | 0              | 0              | 0              | 3                 | 2.9%       | 0.0%       | 0.0%           | 0.0%           | 0.0%           | 0.0%           | 0.0%           | 7.0%  |
| tr I3LIN8 I3LIN8 |         | 2             | 0          | 0          | 0              | 0              | 0              | 0              | 2              | 2          | 0          | 0              | 0              | 0              | 0              | 0              | 3                 | 11.1%      | 0.0%       | 0.0%           | 0.0%           | 0.0%           | 0.0%           | 0.0%           | 9.0%  |
| tr F1RHC5 F1RHC5 |         | 2             | 0          | 0          | 0              | 0              | 0              | 0              | 2              | 2          | 0          | 0              | 0              | 0              | 0              | 0              | 3                 | 11.1%      | 0.0%       | 0.0%           | 0.0%           | 0.0%           | 0.0%           | 0.0%           | 8.9%  |
| tr K7GSN9 K7GSN9 |         | 1             | 0          | 0          | 0              | 0              | 0              | 0              | 1              | 2          | 0          | 0              | 0              | 0              | 0              | 0              | 3                 | 9.4%       | 0.0%       | 0.0%           | 0.0%           | 0.0%           | 0.0%           | 0.0%           | 9.4%  |
| tr F1SER9 F1SER9 |         | 1             | 0          | 0          | 0              | 0              | 0              | 0              | 1              | 2          | 0          | 0              | 0              | 0              | 0              | 0              | 3                 | 0.8%       | 0.0%       | 0.0%           | 0.0%           | 0.0%           | 0.0%           | 0.0%           | 0.4%  |
| tr F1RUT3 F1RUT3 |         | 1             | 1          | 1          | 0              | 0              | 0              | 1              | 1              | 1          | 1          | 6              | 0              | 0              | 0              | 6              | 5                 | 3.3%       | 3.3%       | 3.3%           | 0.0%           | 0.0%           | 0.0%           | 4.1%           | 4.1%  |
| tr F2Z5I7 F2Z5I7 |         | 2             | 0          | 4          | 0              | 0              | 0              | 1              | 3              | 2          | 0          | 15             | 0              | 0              | 0              | 13             | 8                 | 7.8%       | 0.0%       | 12.1%          | 0.0%           | 0.0%           | 0.0%           | 4.7%           | 9.2%  |
| tr I3LCG1 I3LCG1 |         | 2             | 0          | 1          | 0              | 0              | 0              | 0              | 2              | 2          | 0          | 3              | 0              | 0              | 0              | 0              | 6                 | 4.0%       | 0.0%       | 3.6%           | 0.0%           | 0.0%           | 0.0%           | 0.0%           | 3.4%  |
| tr I3LT56 I3LT56 |         | 1             | 1          | 2          | 0              | 0              | 0              | 0              | 4              | 1          | 1          | 7              | 0              | 0              | 0              | 0              | 10                | 4.3%       | 4.3%       | 13.0%          | 0.0%           | 0.0%           | 0.0%           | 0.0%           | 21.5% |
| tr F1S9C5 F1S9C5 |         | 2             | 0          | 1          | 0              | 0              | 0              | 0              | 1              | 2          | 0          | 2              | 0              | 0              | 0              | 0              | 4                 | 18.1%      | 0.0%       | 5.3%           | 0.0%           | 0.0%           | 0.0%           | 0.0%           | 5.3%  |
| tr I3LI29 I3LI29 |         | 2             | 0          | 1          | 0              | 0              | 0              | 1              | 0              | 2          | 0          | 1              | 0              | 0              | 0              | 3              | 0                 | 24.4%      | 0.0%       | 11.0%          | 0.0%           | 0.0%           | 0.0%           | 12.2%          | 0.0%  |
| tr I3LSM5 I3LSM5 |         | 1             | 0          | 0          | 0              | 0              | 0              | 0              | 1              | 2          | 0          | 0              | 0              | 0              | 0              | 0              | 2                 | 4.6%       | 0.0%       | 0.0%           | 0.0%           | 0.0%           | 0.0%           | 0.0%           | 4.6%  |
| tr I3LCF3 I3LCF3 |         | 1             | 1          | 0          | 0              | 0              | 0              | 0              | 2              | 1          | 1          | 0              | 0              | 0              | 0              | 0              | 2                 | 4.4%       | 1.7%       | 0.0%           | 0.0%           | 0.0%           | 0.0%           | 0.0%           | 8.4%  |
| tr F1SCG1 F1SCG1 |         | 2             | 0          | 0          | 0              | 0              | 0              | 0              | 1              | 2          | 0          | 0              | 0              | 0              | 0              | 0              | 2                 | 4.0%       | 0.0%       | 0.0%           | 0.0%           | 0.0%           | 0.0%           | 0.0%           | 3.5%  |
| tr F1SIC6 F1SIC6 |         | 1             | 0          | 0          | 0              | 0              | 0              | 1              | 0              | 2          | 0          | 0              | 0              | 0              | 0              | 2              | 0                 | 2.9%       | 0.0%       | 0.0%           | 0.0%           | 0.0%           | 0.0%           | 3.8%           | 0.0%  |
| P15983           |         | 1             | 0          | 0          | 0              | 0              | 0              | 0              | 1              | 2          | 0          | 0              | 0              | 0              | 0              | 0              | 2                 | 8.9%       | 0.0%       | 0.0%           | 0.0%           | 0.0%           | 0.0%           | 0.0%           | 8.9%  |
| P15982           |         | 1             | 0          | 0          | 0              | 0              | 0              | 0              | 1              | 2          | 0          | 0              | 0              | 0              | 0              | 0              | 2                 | 8.8%       | 0.0%       | 0.0%           | 0.0%           | 0.0%           | 0.0%           | 0.0%           | 8.8%  |
| tr F1S9P4 F1S9P4 |         | 1             | 1          | 0          | 0              | 0              | 0              | 0              | 1              | 1          | 1          | 0              | 0              | 0              | 0              | 0              | 2                 | 3.0%       | 2.5%       | 0.0%           | 0.0%           | 0.0%           | 0.0%           | 0.0%           | 3.5%  |
| tr I3LL45 I3LL45 |         | 2             | 0          | 0          | 0              | 0              | 0              | 0              | 2              | 2          | 0          | 0              | 0              | 0              | 0              | 0              | 2                 | 26.1%      | 0.0%       | 0.0%           | 0.0%           | 0.0%           | 0.0%           | 0.0%           | 10.6% |
| tr Q8MG99 Q8MG99 |         | 1             | 0          | 0          | 0              | 0              | 0              | 0              | 1              | 2          | 0          | 0              | 0              | 0              | 0              | 0              | 2                 | 8.8%       | 0.0%       | 0.0%           | 0.0%           | 0.0%           | 0.0%           | 0.0%           | 8.8%  |
| tr F1RY74 F1RY74 |         | 1             | 0          | 0          | 0              | 0              | 0              | 0              | 1              | 2          | 0          | 0              | 0              | 0              | 0              | 0              | 2                 | 4.6%       | 0.0%       | 0.0%           | 0.0%           | 0.0%           | 0.0%           | 0.0%           | 4.6%  |
| tr F1SUW7 F1SUW7 |         | 2             | 0          | 0          | 0              | 0              | 0              | 0              | 1              | 2          | 0          | 0              | 0              | 0              | 0              | 0              | 2                 | 2.5%       | 0.0%       | 0.0%           | 0.0%           | 0.0%           | 0.0%           | 0.0%           | 1.4%  |
| tr F1SSM0 F1SSM0 |         | 1             | 0          | 3          | 0              | 0              | 0              | 0              | 2              | 2          | 0          | 22             | 0              | 0              | 0              | 0              | 23                | 8.8%       | 0.0%       | 8.8%           | 0.0%           | 0.0%           | 0.0%           | 0.0%           | 8.8%  |
| Q29056           |         | 2             | 0          | 2          | 0              | 0              | 0              | 1              | 0              | 2          | 0          | 4              | 0              | 0              | 0              | 5              | 0                 | 10.7%      | 0.0%       | 10.7%          | 0.0%           | 0.0%           | 0.0%           | 20.3%          | 0.0%  |
| tr I3LP69 I3LP69 |         | 1             | 0          | 1          | 0              | 0              | 0              | 0              | 1              | 2          | 0          | 2              | 0              | 0              | 0              | 0              | 3                 | 8.5%       | 0.0%       | 8.8%           | 0.0%           | 0.0%           | 0.0%           | 0.0%           | 8.5%  |
| tr F1RR73 F1RR73 |         | 0             | 1          | 1          | 0              | 0              | 0              | 0              | 1              | 0          | 2          | 4              | 0              | 0              | 0              | 0              | 4                 | 0.0%       | 5.7%       | 16.6%          | 0.0%           | 0.0%           | 0.0%           | 0.0%           | 5.7%  |
| tr F1SLT1 F1SLT1 |         | 2             | 0          | 1          | 0              | 0              | 0              | 0              | 2              | 2          | 0          | 1              | 0              | 0              | 0              | 0              | 2                 | 17.4%      | 0.0%       | 7.3%           | 0.0%           | 0.0%           | 0.0%           | 0.0%           | 18.2% |
| tr F1S031 F1S031 |         | 2             | 0          | 2          | 0              | 0              | 0              | 0              | 1              | 2          | 0          | 11             | 0              | 0              | 0              | 0              | 8                 | 12.2%      | 0.0%       | 20.3%          | 0.0%           | 0.0%           | 0.0%           | 0.0%           | 12.2% |
| tr I3L8U8 I3L8U8 |         | 1             | 0          | 2          | 0              | 0              | 0              | 0              | 1              | 2          | 0          | 9              | 0              | 0              | 0              | 0              | 6                 | 18.3%      | 0.0%       | 8.5%           | 0.0%           | 0.0%           | 0.0%           | 0.0%           | 18.3% |
| P31006           |         | 1             | 0          | 0          | 0              | 0              | 0              | 0              | 1              | 2          | 0          | 0              | 0              | 0              | 0              | 0              | 1                 | 11.1%      | 0.0%       | 0.0%           | 0.0%           | 0.0%           | 0.0%           | 0.0%           | 11.1% |
| tr F1RPR6 F1RPR6 |         | 1             | 0          | 0          | 0              | 0              | 0              | 0              | 1              | 2          | 0          | 0              | 0              | 0              | 0              | 0              | 1                 | 9.9%       | 0.0%       | 0.0%           | 0.0%           | 0.0%           | 0.0%           | 0.0%           | 4.0%  |
| tr F1S2Q4 F1S2Q4 |         | 0             | 1          | 0          | 0              | 0              | 0              | 0              | 1              | 0          | 2          | 0              | 0              |                |                |                |                   |            |            |                |                |                |                |                |       |

| Accession                | Sample# | Peptide Count |            |            |                |                |                |                | Spectral Count |            |            |                |                |                |                | Sequence Coverage |            |            |                |                |                |                |       |       |
|--------------------------|---------|---------------|------------|------------|----------------|----------------|----------------|----------------|----------------|------------|------------|----------------|----------------|----------------|----------------|-------------------|------------|------------|----------------|----------------|----------------|----------------|-------|-------|
|                          |         | Whole Cell    | Whole Cell | Whole Cell | Cilia Fraction | Cilia Fraction | Cilia Fraction | Cilia Fraction | Whole Cell     | Whole Cell | Whole Cell | Cilia Fraction | Cilia Fraction | Cilia Fraction | Cilia Fraction | Whole Cell        | Whole Cell | Whole Cell | Cilia Fraction | Cilia Fraction | Cilia Fraction | Cilia Fraction |       |       |
|                          |         | 1             | 2          | 6          | 4              | 3              | 5              | 7              | 1              | 2          | 6          | 4              | 3              | 5              | 7              | 1                 | 2          | 6          | 4              | 3              | 5              | 7              | 8     |       |
| tr F1SD90 F1SD90         |         | 2             | 0          | 1          | 0              | 0              | 0              | 1              | 0              | 2          | 0          | 2              | 0              | 0              | 0              | 1                 | 0          | 5.1%       | 0.0%           | 1.6%           | 0.0%           | 0.0%           | 2.3%  | 0.0%  |
| tr I3LRM5 I3LRM5         |         | 1             | 0          | 1          | 0              | 0              | 0              | 1              | 0              | 2          | 0          | 7              | 0              | 0              | 0              | 2                 | 0          | 1.5%       | 0.0%           | 1.5%           | 0.0%           | 0.0%           | 1.5%  | 0.0%  |
| tr I3LCL4 I3LCL4         |         | 1             | 0          | 1          | 0              | 0              | 0              | 1              | 0              | 2          | 0          | 7              | 0              | 0              | 0              | 2                 | 0          | 0.7%       | 0.0%           | 0.7%           | 0.0%           | 0.0%           | 0.7%  | 0.0%  |
| tr F1RJW8 F1RJW8         |         | 1             | 0          | 1          | 0              | 0              | 0              | 0              | 1              | 2          | 0          | 3              | 0              | 0              | 0              | 0                 | 1          | 3.5%       | 0.0%           | 2.9%           | 0.0%           | 0.0%           | 0.0%  | 3.5%  |
| tr A7YX24 A7YX24         |         | 2             | 0          | 2          | 0              | 0              | 0              | 1              | 1              | 2          | 0          | 15             | 0              | 0              | 0              | 1                 | 1          | 30.2%      | 0.0%           | 20.6%          | 0.0%           | 0.0%           | 12.7% | 12.7% |
| tr I3LS60 I3LS60         |         | 2             | 0          | 6          | 0              | 0              | 0              | 0              | 1              | 2          | 0          | 26             | 0              | 0              | 0              | 0                 | 3          | 11.0%      | 0.0%           | 21.3%          | 0.0%           | 0.0%           | 0.0%  | 5.5%  |
| tr F1SCM9 F1SCM9         |         | 2             | 0          | 2          | 0              | 0              | 0              | 0              | 1              | 2          | 0          | 8              | 0              | 0              | 0              | 0                 | 1          | 3.7%       | 0.0%           | 4.0%           | 0.0%           | 0.0%           | 0.0%  | 3.5%  |
| tr K7GPA8 K7GPA8         |         | 1             | 0          | 1          | 0              | 0              | 0              | 0              | 1              | 2          | 0          | 8              | 0              | 0              | 0              | 0                 | 1          | 14.0%      | 0.0%           | 4.5%           | 0.0%           | 0.0%           | 0.0%  | 4.5%  |
| tr K7GQ44 K7GQ44         |         | 2             | 0          | 3          | 0              | 0              | 0              | 0              | 0              | 1          | 2          | 0              | 9              | 0              | 0              | 0                 | 0          | 5.8%       | 0.0%           | 9.6%           | 0.0%           | 0.0%           | 0.0%  | 3.7%  |
| tr K7GR37 K7GR37         |         | 2             | 0          | 3          | 0              | 0              | 0              | 0              | 1              | 2          | 0          | 9              | 0              | 0              | 0              | 0                 | 1          | 5.9%       | 0.0%           | 9.6%           | 0.0%           | 0.0%           | 0.0%  | 3.7%  |
| tr K7GKL7 K7GKL7         |         | 2             | 0          | 3          | 0              | 0              | 0              | 0              | 1              | 2          | 0          | 9              | 0              | 0              | 0              | 0                 | 1          | 5.8%       | 0.0%           | 9.5%           | 0.0%           | 0.0%           | 0.0%  | 3.7%  |
| tr F1RUA1 F1RUA1         |         | 2             | 0          | 3          | 0              | 0              | 0              | 0              | 0              | 1          | 2          | 0              | 9              | 0              | 0              | 0                 | 0          | 5.8%       | 0.0%           | 9.6%           | 0.0%           | 0.0%           | 0.0%  | 3.7%  |
| tr B0LXP3 B0LXP3         |         | 2             | 0          | 1          | 0              | 0              | 0              | 0              | 1              | 2          | 0          | 9              | 0              | 0              | 0              | 0                 | 1          | 5.1%       | 0.0%           | 2.5%           | 0.0%           | 0.0%           | 0.0%  | 2.5%  |
| tr I3LRH9 I3LRH9         |         | 1             | 1          | 2          | 0              | 0              | 0              | 1              | 0              | 1          | 1          | 14             | 0              | 0              | 0              | 1                 | 0          | 9.6%       | 7.3%           | 24.3%          | 0.0%           | 0.0%           | 7.3%  | 0.0%  |
| tr I3LKQ2 I3LKQ2         |         | 0             | 1          | 4          | 0              | 0              | 0              | 0              | 1              | 0          | 2          | 14             | 0              | 0              | 0              | 0                 | 1          | 0.0%       | 6.9%           | 22.4%          | 0.0%           | 0.0%           | 0.0%  | 10.3% |
| P20192                   |         | 1             | 0          | 1          | 0              | 0              | 0              | 0              | 1              | 2          | 0          | 14             | 0              | 0              | 0              | 0                 | 1          | 2.3%       | 0.0%           | 2.6%           | 0.0%           | 0.0%           | 0.0%  | 2.3%  |
| tr F1RVD2 F1RVD2         |         | 1             | 1          | 4          | 0              | 0              | 0              | 1              | 0              | 1          | 1          | 18             | 0              | 0              | 0              | 1                 | 0          | 8.4%       | 10.3%          | 10.7%          | 0.0%           | 0.0%           | 5.0%  | 0.0%  |
| tr K7GLT1 K7GLT1         |         | 2             | 0          | 2          | 0              | 0              | 0              | 0              | 2              | 2          | 0          | 206            | 0              | 0              | 0              | 0                 | 7          | 23.8%      | 0.0%           | 23.8%          | 0.0%           | 0.0%           | 0.0%  | 23.8% |
| tr F1S8V2 F1S8V2         |         | 2             | 0          | 0          | 0              | 0              | 0              | 0              | 0              | 2          | 0          | 0              | 0              | 0              | 0              | 0                 | 0          | 6.3%       | 0.0%           | 0.0%           | 0.0%           | 0.0%           | 0.0%  | 0.0%  |
| tr F1RP77 F1RP77         |         | 1             | 1          | 0          | 0              | 0              | 0              | 0              | 0              | 1          | 1          | 0              | 0              | 0              | 0              | 0                 | 0          | 0.2%       | 0.5%           | 0.0%           | 0.0%           | 0.0%           | 0.0%  | 0.0%  |
| tr F1SUU8 F1SUU8         |         | 1             | 1          | 0          | 0              | 0              | 0              | 0              | 0              | 1          | 1          | 0              | 0              | 0              | 0              | 0                 | 0          | 2.7%       | 3.3%           | 0.0%           | 0.0%           | 0.0%           | 0.0%  | 0.0%  |
| tr F1RW97 F1RW97         |         | 1             | 0          | 0          | 0              | 0              | 0              | 0              | 0              | 2          | 0          | 0              | 0              | 0              | 0              | 0                 | 0          | 6.6%       | 0.0%           | 0.0%           | 0.0%           | 0.0%           | 0.0%  | 0.0%  |
| tr F1RS13 F1RS13         |         | 2             | 0          | 0          | 0              | 0              | 0              | 0              | 0              | 2          | 0          | 0              | 0              | 0              | 0              | 0                 | 0          | 13.1%      | 0.0%           | 0.0%           | 0.0%           | 0.0%           | 0.0%  | 0.0%  |
| tr K7GM04 K7GM04         |         | 2             | 0          | 0          | 0              | 0              | 0              | 0              | 0              | 2          | 0          | 0              | 0              | 0              | 0              | 0                 | 0          | 7.9%       | 0.0%           | 0.0%           | 0.0%           | 0.0%           | 0.0%  | 0.0%  |
| tr I3LQP7 I3LQP7         |         | 1             | 1          | 0          | 0              | 0              | 0              | 0              | 0              | 1          | 1          | 0              | 0              | 0              | 0              | 0                 | 0          | 3.9%       | 3.9%           | 0.0%           | 0.0%           | 0.0%           | 0.0%  | 0.0%  |
| tr I3L6H8 I3L6H8         |         | 2             | 0          | 0          | 0              | 0              | 0              | 0              | 0              | 2          | 0          | 0              | 0              | 0              | 0              | 0                 | 0          | 9.0%       | 0.0%           | 0.0%           | 0.0%           | 0.0%           | 0.0%  | 0.0%  |
| tr I3L710 I3L710         |         | 2             | 0          | 0          | 0              | 0              | 0              | 0              | 0              | 2          | 0          | 0              | 0              | 0              | 0              | 0                 | 0          | 6.8%       | 0.0%           | 0.0%           | 0.0%           | 0.0%           | 0.0%  | 0.0%  |
| tr I3LI45 I3LI45         |         | 2             | 0          | 0          | 0              | 0              | 0              | 0              | 0              | 2          | 0          | 0              | 0              | 0              | 0              | 0                 | 0          | 7.4%       | 0.0%           | 0.0%           | 0.0%           | 0.0%           | 0.0%  | 0.0%  |
| tr F2Z5W5 F2Z5W5         |         | 1             | 1          | 0          | 0              | 0              | 0              | 0              | 0              | 1          | 1          | 0              | 0              | 0              | 0              | 0                 | 0          | 3.1%       | 2.6%           | 0.0%           | 0.0%           | 0.0%           | 0.0%  | 0.0%  |
| tr F1S2X6 F1S2X6         |         | 0             | 1          | 0          | 0              | 0              | 0              | 0              | 0              | 0          | 2          | 0              | 0              | 0              | 0              | 0                 | 0          | 0.0%       | 3.0%           | 0.0%           | 0.0%           | 0.0%           | 0.0%  | 0.0%  |
| tr I3LGV1 I3LGV1         |         | 0             | 2          | 0          | 0              | 0              | 0              | 0              | 0              | 0          | 2          | 0              | 0              | 0              | 0              | 0                 | 0          | 0.0%       | 3.6%           | 0.0%           | 0.0%           | 0.0%           | 0.0%  | 0.0%  |
| tr F1S120 F1S120         |         | 1             | 0          | 0          | 0              | 0              | 0              | 0              | 0              | 2          | 0          | 0              | 0              | 0              | 0              | 0                 | 0          | 17.8%      | 0.0%           | 0.0%           | 0.0%           | 0.0%           | 0.0%  | 0.0%  |
| tr K7GML9 K7GML9         |         | 2             | 0          | 0          | 0              | 0              | 0              | 0              | 0              | 2          | 0          | 0              | 0              | 0              | 0              | 0                 | 0          | 8.0%       | 0.0%           | 0.0%           | 0.0%           | 0.0%           | 0.0%  | 0.0%  |
| tr I3L7W6 I3L7W6         |         | 1             | 1          | 0          | 0              | 0              | 0              | 0              | 0              | 1          | 1          | 0              | 0              | 0              | 0              | 0                 | 0          | 2.6%       | 2.4%           | 0.0%           | 0.0%           | 0.0%           | 0.0%  | 0.0%  |
| tr F1SIJ2 F1SIJ2         |         | 0             | 1          | 0          | 0              | 0              | 0              | 0              | 0              | 0          | 2          | 0              | 0              | 0              | 0              | 0                 | 0          | 0.0%       | 3.4%           | 0.0%           | 0.0%           | 0.0%           | 0.0%  | 0.0%  |
| tr I3LV53 I3LV53         |         | 1             | 0          | 0          | 0              | 0              | 0              | 0              | 0              | 2          | 0          | 0              | 0              | 0              | 0              | 0                 | 0          | 20.2%      | 0.0%           | 0.0%           | 0.0%           | 0.0%           | 0.0%  | 0.0%  |
| tr F1S0Z4 F1S0Z4         |         | 0             | 1          | 0          | 0              | 0              | 0              | 0              | 0              | 0          | 2          | 0              | 0              | 0              | 0              | 0                 | 0          | 0.0%       | 8.0%           | 0.0%           | 0.0%           | 0.0%           | 0.0%  | 0.0%  |
| tr I3LB23 I3LB23         |         | 2             | 0          | 0          | 0              | 0              | 0              | 0              | 0              | 2          | 0          | 0              | 0              | 0              | 0              | 0                 | 0          | 10.0%      | 0.0%           | 0.0%           | 0.0%           | 0.0%           | 0.0%  | 0.0%  |
| Reverse_tr F1SGT7 F1SGT7 |         | 1             | 0          | 0          | 0              | 0              | 0              | 0              | 0              | 2          | 0          | 0              | 0              | 0              | 0              | 0                 | 0          | 0.8%       | 0.0%           | 0.0%           | 0.0%           | 0.0%           | 0.0%  | 0.0%  |
| tr F1RP47 F1RP47         |         | 0             | 1          | 0          | 0              | 0              | 0              | 0              | 0              | 0          | 2          | 0              | 0              | 0              | 0              | 0                 | 0          | 0.0%       | 2.1%           | 0.0%           | 0.0%           | 0.0%           | 0.0%  | 0.0%  |
| tr K7GSV8 K7GSV8         |         | 1             | 1          | 0          | 0              | 0              | 0              | 0              | 0              | 1          | 1          | 0              | 0              | 0              | 0              | 0                 | 0          | 6.2%       | 6.2%           | 0.0%           | 0.0%           | 0.0%           | 0.0%  | 0.0%  |
| tr F1RW61 F1RW61         |         | 1             | 0          | 0          | 0              | 0              | 0              | 0              | 0              | 2          | 0          | 0              | 0              | 0              | 0              | 0                 | 0          | 14.0%      | 0.0%           | 0.0%           | 0.0%           | 0.0%           | 0.0%  | 0.0%  |
| tr I3LS35 I3LS35         |         | 1             | 1          | 0          | 0              | 0              | 0              | 0              | 0              | 1          | 1          | 0              | 0              | 0              | 0              | 0                 | 0          | 4.9%       | 4.0%           | 0.0%           | 0.0%           | 0.0%           | 0.0%  | 0.0%  |
| tr F1S902 F1S902         |         | 0             | 1          | 0          | 0              | 0              | 0              | 0              | 0              | 0          | 2          | 0              | 0              | 0              | 0              | 0                 | 0          | 0.0%       | 0.9%           | 0.0%           | 0.0%           | 0.0%           | 0.0%  | 0.0%  |
| tr I3L9I8 I3L9I8         |         | 1             | 0          | 0          | 0              | 0              | 0              | 0              | 0              | 2          | 0          | 0              | 0              | 0              | 0              | 0                 | 0          | 8.6%       | 0.0%           | 0.0%           | 0.0%           | 0.0%           | 0.0%  | 0.0%  |
| tr D0G6R6 D0G6R6         |         | 1             | 1          | 0          | 0              | 0              | 0              | 0              | 0              | 1          | 1          | 0              | 0              | 0              | 0              | 0                 | 0          | 6.1%       | 5.2%           | 0.0%           | 0.0%           | 0.0%           | 0.0%  | 0.0%  |
| tr F1SUI9 F1SUI9         |         | 2             | 0          | 0          | 0              | 0              | 0              | 0              | 0              | 2          | 0          | 0              | 0              | 0              | 0              | 0                 | 0          | 6.1%       | 0.0%           | 0.0%           | 0.0%           | 0.0%           | 0.0%  | 0.0%  |
| tr I3LEB1 I3LEB1         |         | 1             | 0          | 0          | 0              | 0              | 0              | 0              | 0              | 2          | 0          | 0              | 0              | 0              | 0              | 0                 | 0          | 4.7%       | 0.0%           | 0.0%           | 0.0%           | 0.0%           | 0.0%  | 0.0%  |
| tr A7L861 A7L861         |         | 1             | 1          | 0          | 0              | 0              | 0              | 0              | 0              | 1          | 1          | 0              | 0              | 0              | 0              | 0                 | 0          | 2.6%       | 1.9%           | 0.0%           | 0.0%           | 0.0%           | 0.0%  | 0.0%  |
| tr F1SSIO F1SSIO         |         | 1             | 1          | 0          | 0              | 0              | 0              | 0              | 0              | 1          | 1          | 0              | 0              | 0              | 0              | 0                 | 0          | 4.1%       | 1.4%           | 0.0%           | 0.0%           | 0.0%           | 0.0%  | 0.0%  |
| tr F1SQ87 F1SQ87         |         | 1             | 1          | 0          | 0              | 0              | 0              | 0              | 0              | 1          | 1          | 0              | 0              | 0              | 0              | 0                 | 0          | 2.3%       | 2.5%           | 0.0%           | 0.0%           | 0.0%           | 0.0%  | 0.0%  |
| tr F1S7S8 F1S7S8         |         | 2             | 0          | 0          | 0              | 0              | 0              | 0              | 0              | 2          | 0          | 0              | 0              | 0              | 0              | 0                 | 0          | 4.0%       | 0.0%           | 0.0%           | 0.0%           | 0.0%           | 0.0%  | 0.0%  |
| tr F1SUE6 F1SUE6         |         | 0             | 1          | 0          | 0              | 0              | 0              | 0              | 0              | 0          | 2          | 0              | 0              | 0              | 0              | 0                 | 0          | 0.0%       | 1.6%           | 0.0%           | 0.0%           | 0.0%           | 0.0%  | 0.0%  |
| tr F1SN51 F1SN51         |         | 2             | 0          | 0          | 0              | 0              | 0              | 0              | 0              | 2          | 0          | 0              | 0              | 0              | 0              | 0                 | 0          | 13.4%      | 0.0%           | 0.0%           | 0.0%           | 0.0%           | 0.0%  | 0.0%  |
| tr I3LH48 I3LH48         |         | 1             | 1          | 0          | 0              | 0              | 0              | 0              | 0              | 1          | 1          | 0              | 0              | 0              | 0              | 0                 | 0          | 10.3%      | 7.7%           | 0.0%           | 0.0%           | 0.0%           | 0.0%  | 0.0%  |
| tr F1S6C2 F1S6C2         |         | 2             | 0          | 0          | 0              | 0              | 0              | 0              | 0              | 2          | 0          | 0              | 0              | 0              | 0              | 0                 | 0          | 9.2%       | 0.0%           | 0.0%           | 0.0%           | 0.0%           | 0.0%  | 0.0%  |
| tr F1SRE7 F1SRE7         |         | 2             | 0          | 0          | 0              | 0              | 0              | 0              | 0              | 2          | 0          | 0              | 0              | 0              | 0              | 0                 | 0          | 32.3%      | 0.0%           | 0.0%           | 0.0%           | 0.0%           | 0.0%  | 0.0%  |
| Q4KRV1                   |         | 2             | 0          | 0          | 0              | 0              | 0              | 0              | 0              | 2          | 0          | 0              | 0              | 0              | 0              | 0                 | 0          | 5.8%       | 0.0%           | 0.0%           | 0.0%           | 0.0%           | 0.0%  | 0.0%  |
| tr F2Z5R2 F2Z5R2         |         | 1             | 1          | 0          | 0              | 0              | 0              | 0              | 0              | 1          | 1          | 0              | 0              | 0              | 0              | 0                 | 0          | 6.5%       | 6.5%           | 0.0%           | 0.0%           | 0.0%           | 0.0%  | 0.0%  |
| tr F1SQC5 F1SQC5         |         | 0             | 2          | 0          | 0              | 0              | 0              | 0              | 0              | 0          | 2          | 0              | 0              | 0              | 0              | 0                 | 0          | 0.0%       | 2.1%           | 0.0%           | 0.0%           | 0.0%           | 0.0%  | 0.0%  |
| tr I3LFF9 I3LFF9         |         | 1             | 0          | 0          | 0              | 0              | 0              | 0              | 0              | 2          | 0          | 0              | 0              | 0              | 0              | 0                 | 0          | 16.5%      | 0.0%           | 0.0%           | 0.0%           | 0.0%           | 0.0%  | 0.0%  |
| tr F1SM56 F1SM56         |         | 1             | 0          | 0          | 0              | 0              | 0              | 0              | 0              | 2          | 0          | 0              | 0              | 0              | 0              | 0                 | 0          | 10.9%      | 0.0%           | 0.0%           | 0.0%           | 0.0%           | 0.0%  | 0.0%  |
| tr F1RUV2 F1RUV2         |         | 2             | 0          | 0          | 0              | 0              | 0              | 0              | 0              | 2          | 0          | 0              | 0              | 0              | 0              | 0                 | 0          | 2.7%       | 0.0%           | 0.0%           | 0.0%           | 0.0%           | 0.0%  | 0.0%  |
| tr K7GPW5 K7GPW5         |         | 2             | 0          | 0          | 0              | 0              | 0              | 0              | 0              | 2          | 0          | 0              | 0              | 0              | 0              | 0                 | 0          | 5.8%       | 0.0%           | 0.0%           | 0.0%           | 0.0%           | 0.0%  | 0.0%  |
| tr F1RS57 F1RS57         |         | 0             | 1          | 0          | 0              | 0              | 0              | 0              | 0              | 0          | 2          | 0              | 0              | 0              | 0              | 0                 | 0          | 0.0%       | 5.4%           | 0.0%           | 0.0%           | 0.0%           | 0.0%  | 0.0%  |
| tr F1SQW8 F1SQW8         |         | 2             | 0          | 0          | 0              | 0              | 0              | 0              | 0              | 2          | 0          | 0              | 0              | 0              | 0              |                   |            |            |                |                |                |                |       |       |

| Sample#                  | Peptide Count |            |            |                |                |                |                |                | Spectral Count |            |            |                |                |                |                |                | Sequence Coverage |            |            |                |                |                |                |                |
|--------------------------|---------------|------------|------------|----------------|----------------|----------------|----------------|----------------|----------------|------------|------------|----------------|----------------|----------------|----------------|----------------|-------------------|------------|------------|----------------|----------------|----------------|----------------|----------------|
|                          | Whole Cell    | Whole Cell | Whole Cell | Cilia Fraction | Whole Cell     | Whole Cell | Whole Cell | Cilia Fraction | Whole Cell        | Whole Cell | Whole Cell | Cilia Fraction |
|                          | 1             | 2          | 6          | 4              | 3              | 5              | 7              | 8              | 1              | 2          | 6          | 4              | 3              | 5              | 7              | 8              | 1                 | 2          | 6          | 4              | 3              | 5              | 7              | 8              |
| Accession                |               |            |            |                |                |                |                |                |                |            |            |                |                |                |                |                |                   |            |            |                |                |                |                |                |
| tr F1SHM3 F1SHM3         | 1             | 0          | 0          | 0              | 0              | 0              | 0              | 0              | 2              | 0          | 0          | 0              | 0              | 0              | 0              | 0              | 1.1%              | 0.0%       | 0.0%       | 0.0%           | 0.0%           | 0.0%           | 0.0%           | 0.0%           |
| tr I3LQ32 I3LQ32         | 1             | 0          | 0          | 0              | 0              | 0              | 0              | 0              | 2              | 0          | 0          | 0              | 0              | 0              | 0              | 0              | 20.4%             | 0.0%       | 0.0%       | 0.0%           | 0.0%           | 0.0%           | 0.0%           | 0.0%           |
| Q66RM2                   | 1             | 1          | 0          | 0              | 0              | 0              | 0              | 0              | 1              | 1          | 0          | 0              | 0              | 0              | 0              | 0              | 3.8%              | 3.8%       | 0.0%       | 0.0%           | 0.0%           | 0.0%           | 0.0%           | 0.0%           |
| tr F1SBH1 F1SBH1         | 1             | 1          | 0          | 0              | 0              | 0              | 0              | 0              | 1              | 1          | 0          | 0              | 0              | 0              | 0              | 0              | 12.9%             | 10.5%      | 0.0%       | 0.0%           | 0.0%           | 0.0%           | 0.0%           | 0.0%           |
| tr F1RKU5 F1RKU5         | 2             | 0          | 0          | 0              | 0              | 0              | 0              | 0              | 2              | 0          | 0          | 0              | 0              | 0              | 0              | 0              | 5.4%              | 0.0%       | 0.0%       | 0.0%           | 0.0%           | 0.0%           | 0.0%           | 0.0%           |
| tr F1S1L1 F1S1L1         | 2             | 0          | 0          | 0              | 0              | 0              | 0              | 0              | 2              | 0          | 0          | 0              | 0              | 0              | 0              | 0              | 19.6%             | 0.0%       | 0.0%       | 0.0%           | 0.0%           | 0.0%           | 0.0%           | 0.0%           |
| tr F1RGS0 F1RGS0         | 0             | 1          | 0          | 0              | 0              | 0              | 0              | 0              | 0              | 2          | 0          | 0              | 0              | 0              | 0              | 0              | 0.0%              | 0.7%       | 0.0%       | 0.0%           | 0.0%           | 0.0%           | 0.0%           | 0.0%           |
| tr F1RM18 F1RM18         | 0             | 1          | 0          | 0              | 0              | 0              | 0              | 0              | 0              | 2          | 0          | 0              | 0              | 0              | 0              | 0              | 0.0%              | 3.0%       | 0.0%       | 0.0%           | 0.0%           | 0.0%           | 0.0%           | 0.0%           |
| tr K7GSP2 K7GSP2         | 0             | 1          | 0          | 0              | 0              | 0              | 0              | 0              | 0              | 2          | 0          | 0              | 0              | 0              | 0              | 0              | 0.0%              | 7.1%       | 0.0%       | 0.0%           | 0.0%           | 0.0%           | 0.0%           | 0.0%           |
| tr F1S1F5 F1S1F5         | 1             | 1          | 0          | 0              | 0              | 0              | 0              | 0              | 1              | 1          | 0          | 0              | 0              | 0              | 0              | 0              | 6.5%              | 6.5%       | 0.0%       | 0.0%           | 0.0%           | 0.0%           | 0.0%           | 0.0%           |
| Reverse_tr I3LHP2 I3LHP2 | 0             | 1          | 0          | 0              | 0              | 0              | 0              | 0              | 0              | 2          | 0          | 0              | 0              | 0              | 0              | 0              | 0.0%              | 3.9%       | 0.0%       | 0.0%           | 0.0%           | 0.0%           | 0.0%           | 0.0%           |
| tr F1SGR7 F1SGR7         | 0             | 1          | 0          | 0              | 0              | 0              | 0              | 0              | 0              | 2          | 0          | 0              | 0              | 0              | 0              | 0              | 0.0%              | 1.8%       | 0.0%       | 0.0%           | 0.0%           | 0.0%           | 0.0%           | 0.0%           |
| tr F1RZD0 F1RZD0         | 0             | 1          | 0          | 0              | 0              | 0              | 0              | 0              | 0              | 2          | 0          | 0              | 0              | 0              | 0              | 0              | 0.0%              | 5.0%       | 0.0%       | 0.0%           | 0.0%           | 0.0%           | 0.0%           | 0.0%           |
| tr F1RQE0 F1RQE0         | 2             | 0          | 0          | 0              | 0              | 0              | 0              | 0              | 2              | 0          | 0          | 0              | 0              | 0              | 0              | 0              | 4.2%              | 0.0%       | 0.0%       | 0.0%           | 0.0%           | 0.0%           | 0.0%           | 0.0%           |
| tr F1RZ35 F1RZ35         | 1             | 0          | 0          | 0              | 0              | 0              | 0              | 0              | 2              | 0          | 0          | 0              | 0              | 0              | 0              | 0              | 7.3%              | 0.0%       | 0.0%       | 0.0%           | 0.0%           | 0.0%           | 0.0%           | 0.0%           |
| tr K7GRK9 K7GRK9         | 2             | 0          | 0          | 0              | 0              | 0              | 0              | 0              | 2              | 0          | 0          | 0              | 0              | 0              | 0              | 0              | 21.1%             | 0.0%       | 0.0%       | 0.0%           | 0.0%           | 0.0%           | 0.0%           | 0.0%           |
| tr F1RF28 F1RF28         | 0             | 1          | 0          | 0              | 0              | 0              | 0              | 0              | 0              | 2          | 0          | 0              | 0              | 0              | 0              | 0              | 0.0%              | 0.7%       | 0.0%       | 0.0%           | 0.0%           | 0.0%           | 0.0%           | 0.0%           |
| tr K7GLQ7 K7GLQ7         | 0             | 1          | 0          | 0              | 0              | 0              | 0              | 0              | 0              | 2          | 0          | 0              | 0              | 0              | 0              | 0              | 0.0%              | 5.3%       | 0.0%       | 0.0%           | 0.0%           | 0.0%           | 0.0%           | 0.0%           |
| tr I3LHP0 I3LHP0         | 0             | 1          | 0          | 0              | 0              | 0              | 0              | 0              | 0              | 2          | 0          | 0              | 0              | 0              | 0              | 0              | 0.0%              | 4.8%       | 0.0%       | 0.0%           | 0.0%           | 0.0%           | 0.0%           | 0.0%           |
| tr F1SDD7 F1SDD7         | 1             | 1          | 0          | 0              | 0              | 0              | 0              | 0              | 1              | 1          | 0          | 0              | 0              | 0              | 0              | 0              | 3.9%              | 2.8%       | 0.0%       | 0.0%           | 0.0%           | 0.0%           | 0.0%           | 0.0%           |
| tr F1RNB1 F1RNB1         | 1             | 0          | 0          | 0              | 0              | 0              | 0              | 0              | 2              | 0          | 0          | 0              | 0              | 0              | 0              | 0              | 6.6%              | 0.0%       | 0.0%       | 0.0%           | 0.0%           | 0.0%           | 0.0%           | 0.0%           |
| tr F1SMC1 F1SMC1         | 0             | 1          | 0          | 0              | 0              | 0              | 0              | 0              | 0              | 2          | 0          | 0              | 0              | 0              | 0              | 0              | 0.0%              | 4.2%       | 0.0%       | 0.0%           | 0.0%           | 0.0%           | 0.0%           | 0.0%           |
| A1Y2K1                   | 2             | 0          | 0          | 0              | 0              | 0              | 0              | 0              | 2              | 0          | 0          | 0              | 0              | 0              | 0              | 0              | 2.8%              | 0.0%       | 0.0%       | 0.0%           | 0.0%           | 0.0%           | 0.0%           | 0.0%           |
| tr I3LUH6 I3LUH6         | 0             | 1          | 0          | 0              | 0              | 0              | 0              | 0              | 0              | 2          | 0          | 0              | 0              | 0              | 0              | 0              | 0.0%              | 9.6%       | 0.0%       | 0.0%           | 0.0%           | 0.0%           | 0.0%           | 0.0%           |
| tr I3LF14 I3LF14         | 1             | 0          | 0          | 0              | 0              | 0              | 0              | 0              | 2              | 0          | 0          | 0              | 0              | 0              | 0              | 0              | 30.5%             | 0.0%       | 0.0%       | 0.0%           | 0.0%           | 0.0%           | 0.0%           | 0.0%           |
| tr I3LKT2 I3LKT2         | 1             | 1          | 0          | 0              | 0              | 0              | 0              | 0              | 1              | 1          | 0          | 0              | 0              | 0              | 0              | 0              | 4.1%              | 4.1%       | 0.0%       | 0.0%           | 0.0%           | 0.0%           | 0.0%           | 0.0%           |
| tr F1RS71 F1RS71         | 2             | 0          | 0          | 0              | 0              | 0              | 0              | 0              | 2              | 0          | 0          | 0              | 0              | 0              | 0              | 0              | 5.5%              | 0.0%       | 0.0%       | 0.0%           | 0.0%           | 0.0%           | 0.0%           | 0.0%           |
| tr I3LRES I3LRES         | 2             | 0          | 0          | 0              | 0              | 0              | 0              | 0              | 2              | 0          | 0          | 0              | 0              | 0              | 0              | 0              | 1.9%              | 0.0%       | 0.0%       | 0.0%           | 0.0%           | 0.0%           | 0.0%           | 0.0%           |
| tr F1RWX5 F1RWX5         | 0             | 1          | 0          | 0              | 0              | 0              | 0              | 0              | 0              | 2          | 0          | 0              | 0              | 0              | 0              | 0              | 0.0%              | 2.3%       | 0.0%       | 0.0%           | 0.0%           | 0.0%           | 0.0%           | 0.0%           |
| tr F1SA56 F1SA56         | 1             | 0          | 0          | 0              | 0              | 0              | 0              | 0              | 2              | 0          | 0          | 0              | 0              | 0              | 0              | 0              | 8.9%              | 0.0%       | 0.0%       | 0.0%           | 0.0%           | 0.0%           | 0.0%           | 0.0%           |
| tr F1RQV4 F1RQV4         | 2             | 0          | 0          | 0              | 0              | 0              | 0              | 0              | 2              | 0          | 0          | 0              | 0              | 0              | 0              | 0              | 5.2%              | 0.0%       | 0.0%       | 0.0%           | 0.0%           | 0.0%           | 0.0%           | 0.0%           |
| tr Q1EG61 Q1EG61         | 0             | 1          | 0          | 0              | 0              | 0              | 0              | 0              | 0              | 2          | 0          | 0              | 0              | 0              | 0              | 0              | 0.0%              | 5.7%       | 0.0%       | 0.0%           | 0.0%           | 0.0%           | 0.0%           | 0.0%           |
| tr F1SAJ9 F1SAJ9         | 2             | 0          | 0          | 0              | 0              | 0              | 0              | 0              | 2              | 0          | 0          | 0              | 0              | 0              | 0              | 0              | 10.5%             | 0.0%       | 0.0%       | 0.0%           | 0.0%           | 0.0%           | 0.0%           | 0.0%           |
| tr F1SAS1 F1SAS1         | 1             | 0          | 0          | 0              | 0              | 0              | 0              | 0              | 2              | 0          | 0          | 0              | 0              | 0              | 0              | 0              | 10.1%             | 0.0%       | 0.0%       | 0.0%           | 0.0%           | 0.0%           | 0.0%           | 0.0%           |
| tr F1S7P3 F1S7P3         | 1             | 0          | 0          | 0              | 0              | 0              | 0              | 0              | 2              | 0          | 0          | 0              | 0              | 0              | 0              | 0              | 2.0%              | 0.0%       | 0.0%       | 0.0%           | 0.0%           | 0.0%           | 0.0%           | 0.0%           |
| tr F1RMF9 F1RMF9         | 2             | 0          | 0          | 0              | 0              | 0              | 0              | 0              | 2              | 0          | 0          | 0              | 0              | 0              | 0              | 0              | 5.1%              | 0.0%       | 0.0%       | 0.0%           | 0.0%           | 0.0%           | 0.0%           | 0.0%           |
| tr I3LVM1 I3LVM1         | 0             | 1          | 0          | 0              | 0              | 0              | 0              | 0              | 0              | 2          | 0          | 0              | 0              | 0              | 0              | 0              | 0.0%              | 6.2%       | 0.0%       | 0.0%           | 0.0%           | 0.0%           | 0.0%           | 0.0%           |
| Q8SQC1                   | 0             | 1          | 0          | 0              | 0              | 0              | 0              | 0              | 0              | 2          | 0          | 0              | 0              | 0              | 0              | 0              | 0.0%              | 2.6%       | 0.0%       | 0.0%           | 0.0%           | 0.0%           | 0.0%           | 0.0%           |
| tr I3LD21 I3LD21         | 2             | 0          | 0          | 0              | 0              | 0              | 0              | 0              | 2              | 0          | 0          | 0              | 0              | 0              | 0              | 0              | 2.3%              | 0.0%       | 0.0%       | 0.0%           | 0.0%           | 0.0%           | 0.0%           | 0.0%           |
| tr A5GFY5 A5GFY5         | 1             | 0          | 0          | 0              | 0              | 0              | 0              | 0              | 2              | 0          | 0          | 0              | 0              | 0              | 0              | 0              | 8.9%              | 0.0%       | 0.0%       | 0.0%           | 0.0%           | 0.0%           | 0.0%           | 0.0%           |
| tr I3LHA8 I3LHA8         | 1             | 0          | 0          | 0              | 0              | 0              | 0              | 0              | 2              | 0          | 0          | 0              | 0              | 0              | 0              | 0              | 29.8%             | 0.0%       | 0.0%       | 0.0%           | 0.0%           | 0.0%           | 0.0%           | 0.0%           |
| tr F1S9S2 F1S9S2         | 2             | 0          | 0          | 0              | 0              | 0              | 0              | 0              | 2              | 0          | 0          | 0              | 0              | 0              | 0              | 0              | 1.8%              | 0.0%       | 0.0%       | 0.0%           | 0.0%           | 0.0%           | 0.0%           | 0.0%           |
| tr K7GKG2 K7GKG2         | 2             | 0          | 0          | 0              | 0              | 0              | 0              | 0              | 2              | 0          | 0          | 0              | 0              | 0              | 0              | 0              | 6.4%              | 0.0%       | 0.0%       | 0.0%           | 0.0%           | 0.0%           | 0.0%           | 0.0%           |
| tr I3LKD8 I3LKD8         | 1             | 0          | 0          | 0              | 0              | 0              | 0              | 0              | 2              | 0          | 0          | 0              | 0              | 0              | 0              | 0              | 17.1%             | 0.0%       | 0.0%       | 0.0%           | 0.0%           | 0.0%           | 0.0%           | 0.0%           |
| Q9TUZ1                   | 1             | 1          | 0          | 0              | 0              | 0              | 0              | 0              | 1              | 1          | 0          | 0              | 0              | 0              | 0              | 0              | 2.3%              | 1.3%       | 0.0%       | 0.0%           | 0.0%           | 0.0%           | 0.0%           | 0.0%           |
| tr F1S433 F1S433         | 2             | 0          | 0          | 0              | 0              | 0              | 0              | 0              | 2              | 0          | 0          | 0              | 0              | 0              | 0              | 0              | 5.8%              | 0.0%       | 0.0%       | 0.0%           | 0.0%           | 0.0%           | 0.0%           | 0.0%           |
| tr F1SFY7 F1SFY7         | 1             | 1          | 0          | 0              | 0              | 0              | 0              | 0              | 1              | 1          | 0          | 0              | 0              | 0              | 0              | 0              | 8.9%              | 8.9%       | 0.0%       | 0.0%           | 0.0%           | 0.0%           | 0.0%           | 0.0%           |
| tr F1SQL1 F1SQL1         | 0             | 2          | 0          | 0              | 0              | 0              | 0              | 0              | 0              | 2          | 0          | 0              | 0              | 0              | 0              | 0              | 0.0%              | 4.6%       | 0.0%       | 0.0%           | 0.0%           | 0.0%           | 0.0%           | 0.0%           |
| tr F1S5A7 F1S5A7         | 1             | 0          | 0          | 0              | 0              | 0              | 0              | 0              | 2              | 0          | 0          | 0              | 0              | 0              | 0              | 0              | 8.7%              | 0.0%       | 0.0%       | 0.0%           | 0.0%           | 0.0%           | 0.0%           | 0.0%           |
| tr I3LIT6 I3LIT6         | 1             | 1          | 0          | 0              | 0              | 0              | 0              | 0              | 1              | 1          | 0          | 0              | 0              | 0              | 0              | 0              | 4.4%              | 4.7%       | 0.0%       | 0.0%           | 0.0%           | 0.0%           | 0.0%           | 0.0%           |
| tr K7GM51 K7GM51         | 0             | 1          | 0          | 0              | 0              | 0              | 0              | 0              | 0              | 2          | 0          | 0              | 0              | 0              | 0              | 0              | 0.0%              | 5.2%       | 0.0%       | 0.0%           | 0.0%           | 0.0%           | 0.0%           | 0.0%           |
| tr K7GN04 K7GN04         | 2             | 0          | 0          | 0              | 0              | 0              | 0              | 0              | 2              | 0          | 0          | 0              | 0              | 0              | 0              | 0              | 22.3%             | 0.0%       | 0.0%       | 0.0%           | 0.0%           | 0.0%           | 0.0%           | 0.0%           |
| tr I3LUJ1 I3LUJ1         | 1             | 0          | 0          | 0              | 0              | 0              | 0              | 0              | 2              | 0          | 0          | 0              | 0              | 0              | 0              | 0              | 4.9%              | 0.0%       | 0.0%       | 0.0%           | 0.0%           | 0.0%           | 0.0%           | 0.0%           |
| tr F1S1F4 F1S1F4         | 0             | 1          | 0          | 0              | 0              | 0              | 0              | 0              | 0              | 2          | 0          | 0              | 0              | 0              | 0              | 0              | 0.0%              | 2.1%       | 0.0%       | 0.0%           | 0.0%           | 0.0%           | 0.0%           | 0.0%           |
| tr F1SNG4 F1SNG4         | 0             | 1          | 0          | 0              | 0              | 0              | 0              | 0              | 0              | 2          | 0          | 0              | 0              | 0              | 0              | 0              | 0.0%              | 3.1%       | 0.0%       | 0.0%           | 0.0%           | 0.0%           | 0.0%           | 0.0%           |
| tr I3LTK2 I3LTK2         | 2             | 0          | 0          | 0              | 0              | 0              | 0              | 0              | 2              | 0          | 0          | 0              | 0              | 0              | 0              | 0              | 10.9%             | 0.0%       | 0.0%       | 0.0%           | 0.0%           | 0.0%           | 0.0%           | 0.0%           |
| tr I3LPI1 I3LPI1         | 0             | 1          | 0          | 0              | 0              | 0              | 0              | 0              | 0              | 2          | 0          | 0              | 0              | 0              | 0              | 0              | 0.0%              | 2.6%       | 0.0%       | 0.0%           | 0.0%           | 0.0%           | 0.0%           | 0.0%           |
| tr F1S9C2 F1S9C2         | 2             | 0          | 0          | 0              | 0              | 0              | 0              | 0              | 2              | 0          | 0          | 0              | 0              | 0              | 0              | 0              | 7.3%              | 0.0%       | 0.0%       | 0.0%           | 0.0%           | 0.0%           | 0.0%           | 0.0%           |
| Reverse_tr F1S322 F1S322 | 1             | 1          | 0          | 0              | 0              | 0              | 0              | 0              | 1              | 1          | 0          | 0              | 0              | 0              | 0              | 0              | 4.6%              | 4.6%       | 0.0%       | 0.0%           | 0.0%           | 0.0%           | 0.0%           | 0.0%           |
| P81140                   | 0             | 1          | 0          | 0              | 0              | 0              | 0              | 0              | 0              | 2          | 0          | 0              | 0              | 0              | 0              | 0              | 0.0%              | 4.2%       | 0.0%       | 0.0%           | 0.0%           | 0.0%           | 0.0%           | 0.0%           |
| tr F1S8A3 F1S8A3         | 2             | 0          | 0          | 0              | 0              | 0              | 0              | 0              | 2              | 0          | 0          | 0              | 0              | 0              | 0              | 0              | 5.2%              | 0.0%       | 0.0%       | 0.0%           | 0.0%           | 0.0%           | 0.0%           | 0.0%           |
| tr I3LMC8 I3LMC8         | 2             | 0          | 0          | 0              | 0              | 0              | 0              | 0              | 2              | 0          | 0          | 0              | 0              | 0              | 0              | 0              | 13.8%             | 0.0%       | 0.0%       | 0.0%           | 0.0%           | 0.0%           | 0.0%           | 0.0%           |
| tr F1SN06 F1SN06         | 1             | 0          | 0          | 0              | 0              | 0              | 0              | 0              | 2              | 0          | 0          | 0              | 0              | 0              | 0              | 0              | 4.9%              | 0.0%       | 0.0%       | 0.0%           | 0.0%           | 0.0%           | 0.0%           | 0.0%           |
| tr F1RVH5 F1RVH5         | 1             | 1          | 0          | 0              | 0              | 0              | 0              | 0              | 1              |            |            |                |                |                |                |                |                   |            |            |                |                |                |                |                |

| Sample#          | Peptide Count |            |            |                |                |                |                |                | Spectral Count |            |            |                |                |                |                |                | Sequence Coverage |            |            |                |                |                |                |                |
|------------------|---------------|------------|------------|----------------|----------------|----------------|----------------|----------------|----------------|------------|------------|----------------|----------------|----------------|----------------|----------------|-------------------|------------|------------|----------------|----------------|----------------|----------------|----------------|
|                  | Whole Cell    | Whole Cell | Whole Cell | Cilia Fraction | Whole Cell     | Whole Cell | Whole Cell | Cilia Fraction | Whole Cell        | Whole Cell | Whole Cell | Cilia Fraction |
|                  | 1             | 2          | 6          | 4              | 3              | 5              | 7              | 8              | 1              | 2          | 6          | 4              | 3              | 5              | 7              | 8              | 1                 | 2          | 6          | 4              | 3              | 5              | 7              | 8              |
| Accession        |               |            |            |                |                |                |                |                |                |            |            |                |                |                |                |                |                   |            |            |                |                |                |                |                |
| tr F1RSR4 F1RSR4 | 2             | 0          | 0          | 0              | 0              | 0              | 0              | 0              | 2              | 0          | 0          | 0              | 0              | 0              | 0              | 0              | 9.6%              | 0.0%       | 0.0%       | 0.0%           | 0.0%           | 0.0%           | 0.0%           | 0.0%           |
| tr F1RNU7 F1RNU7 | 0             | 1          | 0          | 0              | 0              | 0              | 0              | 0              | 0              | 2          | 0          | 0              | 0              | 0              | 0              | 0              | 0.0%              | 4.1%       | 0.0%       | 0.0%           | 0.0%           | 0.0%           | 0.0%           | 0.0%           |
| tr F1STL2 F1STL2 | 1             | 1          | 0          | 0              | 0              | 0              | 0              | 0              | 1              | 1          | 0          | 0              | 0              | 0              | 0              | 0              | 3.1%              | 1.9%       | 0.0%       | 0.0%           | 0.0%           | 0.0%           | 0.0%           | 0.0%           |
| tr I3LD31 I3LD31 | 2             | 0          | 0          | 0              | 0              | 0              | 0              | 0              | 2              | 0          | 0          | 0              | 0              | 0              | 0              | 0              | 9.5%              | 0.0%       | 0.0%       | 0.0%           | 0.0%           | 0.0%           | 0.0%           | 0.0%           |
| tr F1SSL1 F1SSL1 | 1             | 0          | 0          | 0              | 0              | 0              | 0              | 0              | 2              | 0          | 0          | 0              | 0              | 0              | 0              | 0              | 8.7%              | 0.0%       | 0.0%       | 0.0%           | 0.0%           | 0.0%           | 0.0%           | 0.0%           |
| tr I3LR45 I3LR45 | 1             | 0          | 0          | 0              | 0              | 0              | 0              | 0              | 2              | 0          | 0          | 0              | 0              | 0              | 0              | 0              | 4.5%              | 0.0%       | 0.0%       | 0.0%           | 0.0%           | 0.0%           | 0.0%           | 0.0%           |
| tr F1RS78 F1RS78 | 1             | 0          | 0          | 0              | 0              | 0              | 0              | 0              | 2              | 0          | 0          | 0              | 0              | 0              | 0              | 0              | 5.8%              | 0.0%       | 0.0%       | 0.0%           | 0.0%           | 0.0%           | 0.0%           | 0.0%           |
| tr I3LIH8 I3LIH8 | 2             | 0          | 0          | 0              | 0              | 0              | 0              | 0              | 2              | 0          | 0          | 0              | 0              | 0              | 0              | 0              | 2.0%              | 0.0%       | 0.0%       | 0.0%           | 0.0%           | 0.0%           | 0.0%           | 0.0%           |
| tr I3LHX6 I3LHX6 | 1             | 0          | 0          | 0              | 0              | 0              | 0              | 0              | 2              | 0          | 0          | 0              | 0              | 0              | 0              | 0              | 5.8%              | 0.0%       | 0.0%       | 0.0%           | 0.0%           | 0.0%           | 0.0%           | 0.0%           |
| tr I3LQG9 I3LQG9 | 2             | 0          | 0          | 0              | 0              | 0              | 0              | 0              | 2              | 0          | 0          | 0              | 0              | 0              | 0              | 0              | 18.4%             | 0.0%       | 0.0%       | 0.0%           | 0.0%           | 0.0%           | 0.0%           | 0.0%           |
| tr F1SHX8 F1SHX8 | 0             | 1          | 0          | 0              | 0              | 0              | 0              | 0              | 0              | 2          | 0          | 0              | 0              | 0              | 0              | 0              | 0.0%              | 5.5%       | 0.0%       | 0.0%           | 0.0%           | 0.0%           | 0.0%           | 0.0%           |
| tr K7GLI2 K7GLI2 | 1             | 0          | 0          | 0              | 0              | 0              | 0              | 0              | 2              | 0          | 0          | 0              | 0              | 0              | 0              | 0              | 27.6%             | 0.0%       | 0.0%       | 0.0%           | 0.0%           | 0.0%           | 0.0%           | 0.0%           |
| tr F1RZR5 F1RZR5 | 0             | 1          | 0          | 0              | 0              | 0              | 0              | 0              | 0              | 2          | 0          | 0              | 0              | 0              | 0              | 0              | 0.0%              | 0.7%       | 0.0%       | 0.0%           | 0.0%           | 0.0%           | 0.0%           | 0.0%           |
| tr I3LDY1 I3LDY1 | 1             | 1          | 0          | 0              | 0              | 0              | 0              | 0              | 1              | 1          | 0          | 0              | 0              | 0              | 0              | 0              | 1.5%              | 1.5%       | 0.0%       | 0.0%           | 0.0%           | 0.0%           | 0.0%           | 0.0%           |
| tr K7GQ10 K7GQ10 | 0             | 1          | 0          | 0              | 0              | 0              | 0              | 0              | 0              | 2          | 0          | 0              | 0              | 0              | 0              | 0              | 0.0%              | 6.4%       | 0.0%       | 0.0%           | 0.0%           | 0.0%           | 0.0%           | 0.0%           |
| tr F1RG41 F1RG41 | 1             | 0          | 0          | 0              | 0              | 0              | 0              | 0              | 2              | 0          | 0          | 0              | 0              | 0              | 0              | 0              | 3.5%              | 0.0%       | 0.0%       | 0.0%           | 0.0%           | 0.0%           | 0.0%           | 0.0%           |
| tr F1S698 F1S698 | 2             | 0          | 0          | 0              | 0              | 0              | 0              | 0              | 2              | 0          | 0          | 0              | 0              | 0              | 0              | 0              | 10.4%             | 0.0%       | 0.0%       | 0.0%           | 0.0%           | 0.0%           | 0.0%           | 0.0%           |
| tr F1SK83 F1SK83 | 2             | 0          | 0          | 0              | 0              | 0              | 0              | 0              | 2              | 0          | 0          | 0              | 0              | 0              | 0              | 0              | 7.0%              | 0.0%       | 0.0%       | 0.0%           | 0.0%           | 0.0%           | 0.0%           | 0.0%           |
| tr I3L786 I3L786 | 0             | 1          | 0          | 0              | 0              | 0              | 0              | 0              | 0              | 2          | 0          | 0              | 0              | 0              | 0              | 0              | 0.0%              | 8.9%       | 0.0%       | 0.0%           | 0.0%           | 0.0%           | 0.0%           | 0.0%           |
| tr F1SJ00 F1SJ00 | 2             | 0          | 0          | 0              | 0              | 0              | 0              | 0              | 2              | 0          | 0          | 0              | 0              | 0              | 0              | 0              | 2.6%              | 0.0%       | 0.0%       | 0.0%           | 0.0%           | 0.0%           | 0.0%           | 0.0%           |
| tr F1RK31 F1RK31 | 1             | 1          | 0          | 0              | 0              | 0              | 0              | 0              | 1              | 1          | 0          | 0              | 0              | 0              | 0              | 0              | 1.0%              | 0.8%       | 0.0%       | 0.0%           | 0.0%           | 0.0%           | 0.0%           | 0.0%           |
| tr F1SAB5 F1SAB5 | 2             | 0          | 0          | 0              | 0              | 0              | 0              | 0              | 2              | 0          | 0          | 0              | 0              | 0              | 0              | 0              | 8.0%              | 0.0%       | 0.0%       | 0.0%           | 0.0%           | 0.0%           | 0.0%           | 0.0%           |
| tr F2Z5H0 F2Z5H0 | 2             | 0          | 0          | 0              | 0              | 0              | 0              | 0              | 2              | 0          | 0          | 0              | 0              | 0              | 0              | 0              | 9.0%              | 0.0%       | 0.0%       | 0.0%           | 0.0%           | 0.0%           | 0.0%           | 0.0%           |
| tr F1SAY2 F1SAY2 | 0             | 2          | 0          | 0              | 0              | 0              | 0              | 0              | 0              | 2          | 0          | 0              | 0              | 0              | 0              | 0              | 0.0%              | 2.2%       | 0.0%       | 0.0%           | 0.0%           | 0.0%           | 0.0%           | 0.0%           |
| tr F2Z5S9 F2Z5S9 | 0             | 1          | 0          | 0              | 0              | 0              | 0              | 0              | 0              | 2          | 0          | 0              | 0              | 0              | 0              | 0              | 0.0%              | 14.5%      | 0.0%       | 0.0%           | 0.0%           | 0.0%           | 0.0%           | 0.0%           |
| tr I3LRA4 I3LRA4 | 1             | 0          | 0          | 0              | 0              | 0              | 0              | 0              | 2              | 0          | 0          | 0              | 0              | 0              | 0              | 0              | 9.6%              | 0.0%       | 0.0%       | 0.0%           | 0.0%           | 0.0%           | 0.0%           | 0.0%           |
| tr F1RXS1 F1RXS1 | 0             | 1          | 0          | 0              | 0              | 0              | 0              | 0              | 0              | 2          | 0          | 0              | 0              | 0              | 0              | 0              | 0.0%              | 0.7%       | 0.0%       | 0.0%           | 0.0%           | 0.0%           | 0.0%           | 0.0%           |
| tr F2Z5I3 F2Z5I3 | 0             | 2          | 0          | 0              | 0              | 0              | 0              | 0              | 0              | 2          | 0          | 0              | 0              | 0              | 0              | 0              | 0.0%              | 14.5%      | 0.0%       | 0.0%           | 0.0%           | 0.0%           | 0.0%           | 0.0%           |
| tr I3LDG1 I3LDG1 | 0             | 1          | 0          | 0              | 0              | 0              | 0              | 0              | 0              | 2          | 0          | 0              | 0              | 0              | 0              | 0              | 0.0%              | 2.5%       | 0.0%       | 0.0%           | 0.0%           | 0.0%           | 0.0%           | 0.0%           |
| tr I3LHP1 I3LHP1 | 1             | 0          | 0          | 0              | 0              | 0              | 0              | 0              | 2              | 0          | 0          | 0              | 0              | 0              | 0              | 0              | 13.1%             | 0.0%       | 0.0%       | 0.0%           | 0.0%           | 0.0%           | 0.0%           | 0.0%           |
| tr F1SE16 F1SE16 | 1             | 0          | 0          | 0              | 0              | 0              | 0              | 0              | 2              | 0          | 0          | 0              | 0              | 0              | 0              | 0              | 5.9%              | 0.0%       | 0.0%       | 0.0%           | 0.0%           | 0.0%           | 0.0%           | 0.0%           |
| tr F1S8S7 F1S8S7 | 1             | 1          | 0          | 0              | 0              | 0              | 0              | 0              | 1              | 1          | 0          | 0              | 0              | 0              | 0              | 0              | 3.0%              | 1.5%       | 0.0%       | 0.0%           | 0.0%           | 0.0%           | 0.0%           | 0.0%           |
| tr F1RTZ8 F1RTZ8 | 2             | 0          | 0          | 0              | 0              | 0              | 0              | 0              | 2              | 0          | 0          | 0              | 0              | 0              | 0              | 0              | 12.7%             | 0.0%       | 0.0%       | 0.0%           | 0.0%           | 0.0%           | 0.0%           | 0.0%           |
| tr K7GRY3 K7GRY3 | 0             | 1          | 0          | 0              | 0              | 0              | 0              | 0              | 0              | 2          | 0          | 0              | 0              | 0              | 0              | 0              | 0.0%              | 1.2%       | 0.0%       | 0.0%           | 0.0%           | 0.0%           | 0.0%           | 0.0%           |
| tr F1S8J5 F1S8J5 | 0             | 1          | 0          | 0              | 0              | 0              | 0              | 0              | 0              | 2          | 0          | 0              | 0              | 0              | 0              | 0              | 0.0%              | 0.3%       | 0.0%       | 0.0%           | 0.0%           | 0.0%           | 0.0%           | 0.0%           |
| tr I3LFB6 I3LFB6 | 1             | 0          | 0          | 0              | 0              | 0              | 0              | 0              | 2              | 0          | 0          | 0              | 0              | 0              | 0              | 0              | 2.2%              | 0.0%       | 0.0%       | 0.0%           | 0.0%           | 0.0%           | 0.0%           | 0.0%           |
| tr F1SSX0 F1SSX0 | 2             | 0          | 0          | 0              | 0              | 0              | 0              | 0              | 2              | 0          | 0          | 0              | 0              | 0              | 0              | 0              | 18.8%             | 0.0%       | 0.0%       | 0.0%           | 0.0%           | 0.0%           | 0.0%           | 0.0%           |
| tr F1SIH3 F1SIH3 | 2             | 0          | 0          | 0              | 0              | 0              | 0              | 0              | 2              | 0          | 0          | 0              | 0              | 0              | 0              | 0              | 29.8%             | 0.0%       | 0.0%       | 0.0%           | 0.0%           | 0.0%           | 0.0%           | 0.0%           |
| tr I3LPR6 I3LPR6 | 2             | 0          | 0          | 0              | 0              | 0              | 0              | 0              | 2              | 0          | 0          | 0              | 0              | 0              | 0              | 0              | 2.5%              | 0.0%       | 0.0%       | 0.0%           | 0.0%           | 0.0%           | 0.0%           | 0.0%           |
| tr I3L9F2 I3L9F2 | 2             | 0          | 0          | 0              | 0              | 0              | 0              | 0              | 2              | 0          | 0          | 0              | 0              | 0              | 0              | 0              | 2.7%              | 0.0%       | 0.0%       | 0.0%           | 0.0%           | 0.0%           | 0.0%           | 0.0%           |
| tr F1S4F7 F1S4F7 | 0             | 1          | 0          | 0              | 0              | 0              | 0              | 0              | 0              | 2          | 0          | 0              | 0              | 0              | 0              | 0              | 0.0%              | 2.2%       | 0.0%       | 0.0%           | 0.0%           | 0.0%           | 0.0%           | 0.0%           |
| tr F1SSZ8 F1SSZ8 | 1             | 1          | 0          | 0              | 0              | 0              | 0              | 0              | 1              | 1          | 0          | 0              | 0              | 0              | 0              | 0              | 2.1%              | 1.1%       | 0.0%       | 0.0%           | 0.0%           | 0.0%           | 0.0%           | 0.0%           |
| tr I3LDG5 I3LDG5 | 2             | 0          | 0          | 0              | 0              | 0              | 0              | 0              | 2              | 0          | 0          | 0              | 0              | 0              | 0              | 0              | 3.7%              | 0.0%       | 0.0%       | 0.0%           | 0.0%           | 0.0%           | 0.0%           | 0.0%           |
| tr F1RF27 F1RF27 | 0             | 1          | 0          | 0              | 0              | 0              | 0              | 0              | 0              | 2          | 0          | 0              | 0              | 0              | 0              | 0              | 0.0%              | 1.8%       | 0.0%       | 0.0%           | 0.0%           | 0.0%           | 0.0%           | 0.0%           |
| tr F1SIH1 F1SIH1 | 1             | 1          | 0          | 0              | 0              | 0              | 0              | 0              | 1              | 1          | 0          | 0              | 0              | 0              | 0              | 0              | 7.7%              | 10.5%      | 0.0%       | 0.0%           | 0.0%           | 0.0%           | 0.0%           | 0.0%           |
| tr F1RZN7 F1RZN7 | 1             | 0          | 0          | 0              | 0              | 0              | 0              | 0              | 2              | 0          | 0          | 0              | 0              | 0              | 0              | 0              | 4.5%              | 0.0%       | 0.0%       | 0.0%           | 0.0%           | 0.0%           | 0.0%           | 0.0%           |
| tr F1RPS7 F1RPS7 | 1             | 0          | 0          | 0              | 0              | 0              | 0              | 0              | 2              | 0          | 0          | 0              | 0              | 0              | 0              | 0              | 5.0%              | 0.0%       | 0.0%       | 0.0%           | 0.0%           | 0.0%           | 0.0%           | 0.0%           |
| tr F1S2V9 F1S2V9 | 1             | 0          | 0          | 0              | 0              | 0              | 0              | 0              | 2              | 0          | 0          | 0              | 0              | 0              | 0              | 0              | 17.2%             | 0.0%       | 0.0%       | 0.0%           | 0.0%           | 0.0%           | 0.0%           | 0.0%           |
| tr I3LSQ3 I3LSQ3 | 2             | 0          | 0          | 0              | 0              | 0              | 0              | 0              | 2              | 0          | 0          | 0              | 0              | 0              | 0              | 0              | 12.3%             | 0.0%       | 0.0%       | 0.0%           | 0.0%           | 0.0%           | 0.0%           | 0.0%           |
| tr F1SCA0 F1SCA0 | 2             | 0          | 0          | 0              | 0              | 0              | 0              | 0              | 2              | 0          | 0          | 0              | 0              | 0              | 0              | 0              | 2.3%              | 0.0%       | 0.0%       | 0.0%           | 0.0%           | 0.0%           | 0.0%           | 0.0%           |
| tr I3LS92 I3LS92 | 0             | 2          | 0          | 0              | 0              | 0              | 0              | 0              | 0              | 2          | 0          | 0              | 0              | 0              | 0              | 0              | 0.0%              | 4.6%       | 0.0%       | 0.0%           | 0.0%           | 0.0%           | 0.0%           | 0.0%           |
| tr F1SLS5 F1SLS5 | 1             | 0          | 0          | 0              | 0              | 0              | 0              | 0              | 2              | 0          | 0          | 0              | 0              | 0              | 0              | 0              | 4.2%              | 0.0%       | 0.0%       | 0.0%           | 0.0%           | 0.0%           | 0.0%           | 0.0%           |
| tr F1SDP1 F1SDP1 | 0             | 1          | 0          | 0              | 0              | 0              | 0              | 0              | 0              | 2          | 0          | 0              | 0              | 0              | 0              | 0              | 0.0%              | 5.1%       | 0.0%       | 0.0%           | 0.0%           | 0.0%           | 0.0%           | 0.0%           |
| tr I3LMR6 I3LMR6 | 1             | 0          | 0          | 0              | 0              | 0              | 0              | 0              | 2              | 0          | 0          | 0              | 0              | 0              | 0              | 0              | 34.6%             | 0.0%       | 0.0%       | 0.0%           | 0.0%           | 0.0%           | 0.0%           | 0.0%           |
| tr F1SCU6 F1SCU6 | 2             | 0          | 0          | 0              | 0              | 0              | 0              | 0              | 2              | 0          | 0          | 0              | 0              | 0              | 0              | 0              | 2.9%              | 0.0%       | 0.0%       | 0.0%           | 0.0%           | 0.0%           | 0.0%           | 0.0%           |
| tr F1S4M8 F1S4M8 | 0             | 1          | 0          | 0              | 0              | 0              | 0              | 0              | 0              | 2          | 0          | 0              | 0              | 0              | 0              | 0              | 0.0%              | 2.5%       | 0.0%       | 0.0%           | 0.0%           | 0.0%           | 0.0%           | 0.0%           |
| tr F1SEA8 F1SEA8 | 1             | 0          | 0          | 0              | 0              | 0              | 0              | 0              | 2              | 0          | 0          | 0              | 0              | 0              | 0              | 0              | 3.5%              | 0.0%       | 0.0%       | 0.0%           | 0.0%           | 0.0%           | 0.0%           | 0.0%           |
| tr F2Z5T0 F2Z5T0 | 2             | 0          | 0          | 0              | 0              | 0              | 0              | 0              | 2              | 0          | 0          | 0              | 0              | 0              | 0              | 0              | 9.4%              | 0.0%       | 0.0%       | 0.0%           | 0.0%           | 0.0%           | 0.0%           | 0.0%           |
| tr I3L991 I3L991 | 1             | 1          | 0          | 0              | 0              | 0              | 0              | 0              | 1              | 1          | 0          | 0              | 0              | 0              | 0              | 0              | 11.8%             | 7.5%       | 0.0%       | 0.0%           | 0.0%           | 0.0%           | 0.0%           | 0.0%           |
| tr I3LCM3 I3LCM3 | 0             | 1          | 0          | 0              | 0              | 0              | 0              | 0              | 0              | 2          | 0          | 0              | 0              | 0              | 0              | 0              | 0.0%              | 5.9%       | 0.0%       | 0.0%           | 0.0%           | 0.0%           | 0.0%           | 0.0%           |
| tr I3LCG8 I3LCG8 | 0             | 1          | 0          | 0              | 0              | 0              | 0              | 0              | 0              | 2          | 0          | 0              | 0              | 0              | 0              | 0              | 0.0%              | 9.1%       | 0.0%       | 0.0%           | 0.0%           | 0.0%           | 0.0%           | 0.0%           |
| tr I3L7V5 I3L7V5 | 0             | 2          | 0          | 0              | 0              | 0              | 0              | 0              | 0              | 2          | 0          | 0              | 0              | 0              | 0              | 0              | 0.0%              | 2.3%       | 0.0%       | 0.0%           | 0.0%           | 0.0%           | 0.0%           | 0.0%           |
| tr F1RRM7 F1RRM7 | 0             | 1          | 0          | 0              | 0              | 0              | 0              | 0              | 0              | 2          | 0          | 0              | 0              | 0              | 0              | 0              | 0.0%              | 5.5%       | 0.0%       | 0.0%           | 0.0%           | 0.0%           | 0.0%           | 0.0%           |
| tr F1SSP1 F1SSP1 | 0             | 1          | 0          | 0              | 0              | 0              | 0              | 0              | 0              | 2          | 0          | 0              |                |                |                |                |                   |            |            |                |                |                |                |                |

| Accession              | Sample# | Peptide Count |            |            |                |                |                |                | Spectral Count |            |            |                |                |                |                | Sequence Coverage |            |            |                |                |                |                |      |
|------------------------|---------|---------------|------------|------------|----------------|----------------|----------------|----------------|----------------|------------|------------|----------------|----------------|----------------|----------------|-------------------|------------|------------|----------------|----------------|----------------|----------------|------|
|                        |         | Whole Cell    | Whole Cell | Whole Cell | Cilia Fraction | Cilia Fraction | Cilia Fraction | Cilia Fraction | Whole Cell     | Whole Cell | Whole Cell | Cilia Fraction | Cilia Fraction | Cilia Fraction | Cilia Fraction | Whole Cell        | Whole Cell | Whole Cell | Cilia Fraction | Cilia Fraction | Cilia Fraction | Cilia Fraction |      |
|                        |         | 1             | 2          | 6          | 4              | 3              | 5              | 7              | 1              | 2          | 6          | 4              | 3              | 5              | 7              | 1                 | 2          | 6          | 4              | 3              | 5              | 7              | 8    |
| tr F1RR16 F1RR16       |         | 2             | 0          | 0          | 0              | 0              | 0              | 0              | 2              | 0          | 0          | 0              | 0              | 0              | 0              | 1.7%              | 0.0%       | 0.0%       | 0.0%           | 0.0%           | 0.0%           | 0.0%           | 0.0% |
| tr F1RYR2 F1RYR2       |         | 2             | 0          | 0          | 0              | 0              | 0              | 0              | 2              | 0          | 0          | 0              | 0              | 0              | 0              | 11.0%             | 0.0%       | 0.0%       | 0.0%           | 0.0%           | 0.0%           | 0.0%           | 0.0% |
| tr F1RJC9 F1RJC9       |         | 1             | 0          | 0          | 0              | 0              | 0              | 0              | 2              | 0          | 0          | 0              | 0              | 0              | 0              | 7.7%              | 0.0%       | 0.0%       | 0.0%           | 0.0%           | 0.0%           | 0.0%           | 0.0% |
| tr F1SB54 F1SB54       |         | 1             | 0          | 0          | 0              | 0              | 0              | 0              | 2              | 0          | 0          | 0              | 0              | 0              | 0              | 5.3%              | 0.0%       | 0.0%       | 0.0%           | 0.0%           | 0.0%           | 0.0%           | 0.0% |
| tr F1S776 F1S776       |         | 0             | 1          | 0          | 0              | 0              | 0              | 0              | 0              | 2          | 0          | 0              | 0              | 0              | 0              | 0.0%              | 4.1%       | 0.0%       | 0.0%           | 0.0%           | 0.0%           | 0.0%           | 0.0% |
| tr J9JIM1 J9JIM1       |         | 0             | 1          | 0          | 0              | 0              | 0              | 0              | 0              | 2          | 0          | 0              | 0              | 0              | 0              | 0.0%              | 2.8%       | 0.0%       | 0.0%           | 0.0%           | 0.0%           | 0.0%           | 0.0% |
| tr K7GL51 K7GL51       |         | 2             | 0          | 0          | 0              | 0              | 0              | 0              | 2              | 0          | 0          | 0              | 0              | 0              | 0              | 6.0%              | 0.0%       | 0.0%       | 0.0%           | 0.0%           | 0.0%           | 0.0%           | 0.0% |
| tr I3L8K1 I3L8K1       |         | 1             | 1          | 0          | 0              | 0              | 0              | 0              | 1              | 1          | 0          | 0              | 0              | 0              | 0              | 3.0%              | 1.4%       | 0.0%       | 0.0%           | 0.0%           | 0.0%           | 0.0%           | 0.0% |
| tr I3LR79 I3LR79       |         | 2             | 0          | 0          | 0              | 0              | 0              | 0              | 2              | 0          | 0          | 0              | 0              | 0              | 0              | 21.5%             | 0.0%       | 0.0%       | 0.0%           | 0.0%           | 0.0%           | 0.0%           | 0.0% |
| tr F1SCN0 F1SCN0       |         | 2             | 0          | 0          | 0              | 0              | 0              | 0              | 2              | 0          | 0          | 0              | 0              | 0              | 0              | 4.6%              | 0.0%       | 0.0%       | 0.0%           | 0.0%           | 0.0%           | 0.0%           | 0.0% |
| tr F1SPX9 F1SPX9       |         | 2             | 0          | 0          | 0              | 0              | 0              | 0              | 2              | 0          | 0          | 0              | 0              | 0              | 0              | 4.9%              | 0.0%       | 0.0%       | 0.0%           | 0.0%           | 0.0%           | 0.0%           | 0.0% |
| tr F1SUN6 F1SUN6       |         | 0             | 1          | 0          | 0              | 0              | 0              | 0              | 0              | 2          | 0          | 0              | 0              | 0              | 0              | 0.0%              | 3.4%       | 0.0%       | 0.0%           | 0.0%           | 0.0%           | 0.0%           | 0.0% |
| tr F1S448 F1S448       |         | 1             | 0          | 0          | 0              | 0              | 0              | 0              | 2              | 0          | 0          | 0              | 0              | 0              | 0              | 2.2%              | 0.0%       | 0.0%       | 0.0%           | 0.0%           | 0.0%           | 0.0%           | 0.0% |
| tr F1SQ52 F1SQ52       |         | 1             | 0          | 0          | 0              | 0              | 0              | 0              | 2              | 0          | 0          | 0              | 0              | 0              | 0              | 4.3%              | 0.0%       | 0.0%       | 0.0%           | 0.0%           | 0.0%           | 0.0%           | 0.0% |
| tr F1SI92 F1SI92       |         | 2             | 0          | 0          | 0              | 0              | 0              | 0              | 2              | 0          | 0          | 0              | 0              | 0              | 0              | 10.5%             | 0.0%       | 0.0%       | 0.0%           | 0.0%           | 0.0%           | 0.0%           | 0.0% |
| tr I3LS23 I3LS23       |         | 1             | 1          | 0          | 0              | 0              | 0              | 0              | 1              | 1          | 0          | 0              | 0              | 0              | 0              | 6.1%              | 6.1%       | 0.0%       | 0.0%           | 0.0%           | 0.0%           | 0.0%           | 0.0% |
| tr F1SRB8 F1SRB8       |         | 1             | 0          | 0          | 0              | 0              | 0              | 0              | 2              | 0          | 0          | 0              | 0              | 0              | 0              | 2.9%              | 0.0%       | 0.0%       | 0.0%           | 0.0%           | 0.0%           | 0.0%           | 0.0% |
| tr K7GPF8 K7GPF8       |         | 2             | 0          | 0          | 0              | 0              | 0              | 0              | 2              | 0          | 0          | 0              | 0              | 0              | 0              | 13.0%             | 0.0%       | 0.0%       | 0.0%           | 0.0%           | 0.0%           | 0.0%           | 0.0% |
| tr I3LAZ7 I3LAZ7       |         | 2             | 0          | 0          | 0              | 0              | 0              | 0              | 2              | 0          | 0          | 0              | 0              | 0              | 0              | 22.7%             | 0.0%       | 0.0%       | 0.0%           | 0.0%           | 0.0%           | 0.0%           | 0.0% |
| tr F1S7U4 F1S7U4       |         | 1             | 1          | 0          | 0              | 0              | 0              | 0              | 1              | 1          | 0          | 0              | 0              | 0              | 0              | 1.0%              | 0.9%       | 0.0%       | 0.0%           | 0.0%           | 0.0%           | 0.0%           | 0.0% |
| tr I3LK31 I3LK31       |         | 0             | 1          | 0          | 0              | 0              | 0              | 0              | 0              | 2          | 0          | 0              | 0              | 0              | 0              | 0.0%              | 4.6%       | 0.0%       | 0.0%           | 0.0%           | 0.0%           | 0.0%           | 0.0% |
| tr I3LFH5 I3LFH5       |         | 0             | 1          | 0          | 0              | 0              | 0              | 0              | 0              | 2          | 0          | 0              | 0              | 0              | 0              | 0.0%              | 9.2%       | 0.0%       | 0.0%           | 0.0%           | 0.0%           | 0.0%           | 0.0% |
| tr F1RIS6 F1RIS6       |         | 1             | 0          | 0          | 0              | 0              | 0              | 0              | 2              | 0          | 0          | 0              | 0              | 0              | 0              | 7.3%              | 0.0%       | 0.0%       | 0.0%           | 0.0%           | 0.0%           | 0.0%           | 0.0% |
| tr F1SIJ5 F1SIJ5       |         | 0             | 1          | 0          | 0              | 0              | 0              | 0              | 0              | 2          | 0          | 0              | 0              | 0              | 0              | 0.0%              | 2.9%       | 0.0%       | 0.0%           | 0.0%           | 0.0%           | 0.0%           | 0.0% |
| tr K7GMN4 K7GMN4       |         | 1             | 0          | 0          | 0              | 0              | 0              | 0              | 2              | 0          | 0          | 0              | 0              | 0              | 0              | 3.7%              | 0.0%       | 0.0%       | 0.0%           | 0.0%           | 0.0%           | 0.0%           | 0.0% |
| tr F2Z5V7 F2Z5V7       |         | 0             | 1          | 0          | 0              | 0              | 0              | 0              | 0              | 2          | 0          | 0              | 0              | 0              | 0              | 0.0%              | 13.3%      | 0.0%       | 0.0%           | 0.0%           | 0.0%           | 0.0%           | 0.0% |
| tr F1SMD1 F1SMD1       |         | 0             | 1          | 0          | 0              | 0              | 0              | 0              | 0              | 2          | 0          | 0              | 0              | 0              | 0              | 0.0%              | 0.8%       | 0.0%       | 0.0%           | 0.0%           | 0.0%           | 0.0%           | 0.0% |
| tr I3LUL1 I3LUL1       |         | 1             | 0          | 0          | 0              | 0              | 0              | 0              | 2              | 0          | 0          | 0              | 0              | 0              | 0              | 3.4%              | 0.0%       | 0.0%       | 0.0%           | 0.0%           | 0.0%           | 0.0%           | 0.0% |
| tr F1SHE8 F1SHE8       |         | 2             | 0          | 0          | 0              | 0              | 0              | 0              | 2              | 0          | 0          | 0              | 0              | 0              | 0              | 13.7%             | 0.0%       | 0.0%       | 0.0%           | 0.0%           | 0.0%           | 0.0%           | 0.0% |
| tr F1R183 F1R183       |         | 1             | 1          | 0          | 0              | 0              | 0              | 0              | 1              | 1          | 0          | 0              | 0              | 0              | 0              | 3.5%              | 2.5%       | 0.0%       | 0.0%           | 0.0%           | 0.0%           | 0.0%           | 0.0% |
| tr F1SI54 F1SI54       |         | 2             | 0          | 0          | 0              | 0              | 0              | 0              | 2              | 0          | 0          | 0              | 0              | 0              | 0              | 20.5%             | 0.0%       | 0.0%       | 0.0%           | 0.0%           | 0.0%           | 0.0%           | 0.0% |
| tr I3LLY6 I3LLY6       |         | 1             | 1          | 0          | 0              | 0              | 0              | 0              | 1              | 1          | 0          | 0              | 0              | 0              | 0              | 7.6%              | 3.2%       | 0.0%       | 0.0%           | 0.0%           | 0.0%           | 0.0%           | 0.0% |
| tr I3LFU8 I3LFU8       |         | 2             | 0          | 0          | 0              | 0              | 0              | 0              | 2              | 0          | 0          | 0              | 0              | 0              | 0              | 9.2%              | 0.0%       | 0.0%       | 0.0%           | 0.0%           | 0.0%           | 0.0%           | 0.0% |
| tr F1RUJ1 F1RUJ1       |         | 0             | 1          | 0          | 0              | 0              | 0              | 0              | 0              | 2          | 0          | 0              | 0              | 0              | 0              | 0.0%              | 2.8%       | 0.0%       | 0.0%           | 0.0%           | 0.0%           | 0.0%           | 0.0% |
| tr F1SMH6 F1SMH6       |         | 1             | 0          | 0          | 0              | 0              | 0              | 0              | 2              | 0          | 0          | 0              | 0              | 0              | 0              | 3.8%              | 0.0%       | 0.0%       | 0.0%           | 0.0%           | 0.0%           | 0.0%           | 0.0% |
| tr I3LBQ6 I3LBQ6       |         | 2             | 0          | 0          | 0              | 0              | 0              | 0              | 2              | 0          | 0          | 0              | 0              | 0              | 0              | 7.9%              | 0.0%       | 0.0%       | 0.0%           | 0.0%           | 0.0%           | 0.0%           | 0.0% |
| tr I3L9E4 I3L9E4       |         | 2             | 0          | 0          | 0              | 0              | 0              | 0              | 2              | 0          | 0          | 0              | 0              | 0              | 0              | 8.2%              | 0.0%       | 0.0%       | 0.0%           | 0.0%           | 0.0%           | 0.0%           | 0.0% |
| tr F1SCH4 F1SCH4       |         | 2             | 0          | 0          | 0              | 0              | 0              | 0              | 2              | 0          | 0          | 0              | 0              | 0              | 0              | 3.1%              | 0.0%       | 0.0%       | 0.0%           | 0.0%           | 0.0%           | 0.0%           | 0.0% |
| tr F1SIJ4 F1SIJ4       |         | 1             | 1          | 0          | 0              | 0              | 0              | 0              | 1              | 1          | 0          | 0              | 0              | 0              | 0              | 2.6%              | 3.2%       | 0.0%       | 0.0%           | 0.0%           | 0.0%           | 0.0%           | 0.0% |
| tr K7GKE1 K7GKE1       |         | 2             | 0          | 0          | 0              | 0              | 0              | 0              | 2              | 0          | 0          | 0              | 0              | 0              | 0              | 15.7%             | 0.0%       | 0.0%       | 0.0%           | 0.0%           | 0.0%           | 0.0%           | 0.0% |
| tr F1RTH6 F1RTH6       |         | 2             | 0          | 0          | 0              | 0              | 0              | 0              | 2              | 0          | 0          | 0              | 0              | 0              | 0              | 1.7%              | 0.0%       | 0.0%       | 0.0%           | 0.0%           | 0.0%           | 0.0%           | 0.0% |
| tr F1RUJ0 F1RUJ0       |         | 0             | 1          | 0          | 0              | 0              | 0              | 0              | 0              | 2          | 0          | 0              | 0              | 0              | 0              | 0.0%              | 2.1%       | 0.0%       | 0.0%           | 0.0%           | 0.0%           | 0.0%           | 0.0% |
| tr B0LXP7 B0LXP7       |         | 1             | 1          | 0          | 0              | 0              | 0              | 0              | 1              | 1          | 0          | 0              | 0              | 0              | 0              | 4.9%              | 4.9%       | 0.0%       | 0.0%           | 0.0%           | 0.0%           | 0.0%           | 0.0% |
| tr F1RLF2 F1RLF2       |         | 0             | 1          | 0          | 0              | 0              | 0              | 0              | 0              | 2          | 0          | 0              | 0              | 0              | 0              | 0.0%              | 0.6%       | 0.0%       | 0.0%           | 0.0%           | 0.0%           | 0.0%           | 0.0% |
| tr F1SRD9 F1SRD9       |         | 1             | 0          | 0          | 0              | 0              | 0              | 0              | 2              | 0          | 0          | 0              | 0              | 0              | 0              | 14.9%             | 0.0%       | 0.0%       | 0.0%           | 0.0%           | 0.0%           | 0.0%           | 0.0% |
| tr F1RNN8 F1RNN8       |         | 0             | 1          | 0          | 0              | 0              | 0              | 0              | 0              | 2          | 0          | 0              | 0              | 0              | 0              | 0.0%              | 18.2%      | 0.0%       | 0.0%           | 0.0%           | 0.0%           | 0.0%           | 0.0% |
| tr F1RFD0 F1RFD0       |         | 1             | 0          | 0          | 0              | 0              | 0              | 0              | 2              | 0          | 0          | 0              | 0              | 0              | 0              | 5.2%              | 0.0%       | 0.0%       | 0.0%           | 0.0%           | 0.0%           | 0.0%           | 0.0% |
| tr F1S224 F1S224       |         | 2             | 0          | 0          | 0              | 0              | 0              | 0              | 2              | 0          | 0          | 0              | 0              | 0              | 0              | 3.4%              | 0.0%       | 0.0%       | 0.0%           | 0.0%           | 0.0%           | 0.0%           | 0.0% |
| tr K7GKW0 K7GKW0       |         | 1             | 0          | 0          | 0              | 0              | 0              | 0              | 2              | 0          | 0          | 0              | 0              | 0              | 0              | 11.5%             | 0.0%       | 0.0%       | 0.0%           | 0.0%           | 0.0%           | 0.0%           | 0.0% |
| B3VKQ2                 |         | 2             | 0          | 0          | 0              | 0              | 0              | 0              | 2              | 0          | 0          | 0              | 0              | 0              | 0              | 5.4%              | 0.0%       | 0.0%       | 0.0%           | 0.0%           | 0.0%           | 0.0%           | 0.0% |
| tr I3L9E6 I3L9E6       |         | 2             | 0          | 0          | 0              | 0              | 0              | 0              | 2              | 0          | 0          | 0              | 0              | 0              | 0              | 2.7%              | 0.0%       | 0.0%       | 0.0%           | 0.0%           | 0.0%           | 0.0%           | 0.0% |
| tr I3LNR5 I3LNR5       |         | 0             | 1          | 0          | 0              | 0              | 0              | 0              | 0              | 2          | 0          | 0              | 0              | 0              | 0              | 0.0%              | 3.2%       | 0.0%       | 0.0%           | 0.0%           | 0.0%           | 0.0%           | 0.0% |
| tr F1S438 F1S438       |         | 0             | 1          | 0          | 0              | 0              | 0              | 0              | 0              | 2          | 0          | 0              | 0              | 0              | 0              | 0.0%              | 7.4%       | 0.0%       | 0.0%           | 0.0%           | 0.0%           | 0.0%           | 0.0% |
| tr I3LFX2 I3LFX2       |         | 2             | 0          | 0          | 0              | 0              | 0              | 0              | 2              | 0          | 0          | 0              | 0              | 0              | 0              | 9.2%              | 0.0%       | 0.0%       | 0.0%           | 0.0%           | 0.0%           | 0.0%           | 0.0% |
| tr I3L7B8 I3L7B8       |         | 2             | 0          | 0          | 0              | 0              | 0              | 0              | 2              | 0          | 0          | 0              | 0              | 0              | 0              | 15.5%             | 0.0%       | 0.0%       | 0.0%           | 0.0%           | 0.0%           | 0.0%           | 0.0% |
| tr F1S727 F1S727       |         | 1             | 1          | 0          | 0              | 0              | 0              | 0              | 1              | 1          | 0          | 0              | 0              | 0              | 0              | 2.1%              | 0.8%       | 0.0%       | 0.0%           | 0.0%           | 0.0%           | 0.0%           | 0.0% |
| tr I3LAF9 I3LAF9       |         | 0             | 2          | 0          | 0              | 0              | 0              | 0              | 0              | 2          | 0          | 0              | 0              | 0              | 0              | 0.0%              | 3.0%       | 0.0%       | 0.0%           | 0.0%           | 0.0%           | 0.0%           | 0.0% |
| tr I3LPS8 I3LPS8       |         | 0             | 1          | 0          | 0              | 0              | 0              | 0              | 0              | 2          | 0          | 0              | 0              | 0              | 0              | 0.0%              | 4.9%       | 0.0%       | 0.0%           | 0.0%           | 0.0%           | 0.0%           | 0.0% |
| tr B8XSJ9 B8XSJ9       |         | 0             | 1          | 0          | 0              | 0              | 0              | 0              | 0              | 2          | 0          | 0              | 0              | 0              | 0              | 0.0%              | 4.3%       | 0.0%       | 0.0%           | 0.0%           | 0.0%           | 0.0%           | 0.0% |
| tr I3LD06 I3LD06       |         | 1             | 1          | 0          | 0              | 0              | 0              | 0              | 1              | 1          | 0          | 0              | 0              | 0              | 0              | 2.1%              | 1.1%       | 0.0%       | 0.0%           | 0.0%           | 0.0%           | 0.0%           | 0.0% |
| tr F1S9U2 F1S9U2       |         | 1             | 1          | 0          | 0              | 0              | 0              | 0              | 1              | 1          | 0          | 0              | 0              | 0              | 0              | 3.6%              | 2.9%       | 0.0%       | 0.0%           | 0.0%           | 0.0%           | 0.0%           | 0.0% |
| Reverse_sp P51779 CFAD |         | 0             | 1          | 0          | 0              | 0              | 0              | 0              | 0              | 2          | 0          | 0              | 0              | 0              | 0              | 0.0%              | 7.7%       | 0.0%       | 0.0%           | 0.0%           | 0.0%           | 0.0%           | 0.0% |
| tr I3LQK9 I3LQK9       |         | 0             | 1          | 0          | 0              | 0              | 0              | 0              | 0              | 2          | 0          | 0              | 0              | 0              | 0              | 0.0%              | 2.5%       | 0.0%       | 0.0%           | 0.0%           | 0.0%           | 0.0%           | 0.0% |
| tr I3LGA2 I3LGA2       |         | 0             | 2          | 0          | 0              | 0              | 0              | 0              | 0              | 2          | 0          | 0              | 0              | 0              | 0              | 0.0%              | 7.5%       | 0.0%       | 0.0%           | 0.0%           | 0.0%           | 0.0%           | 0.0% |
| tr F1S4F8 F1S4F8       |         | 0             | 1          | 0          | 0              | 0              | 0              | 0              | 0              | 2          | 0          | 0              | 0              | 0              | 0              | 0.0%              | 2.2%       | 0.0%       | 0.0%           | 0.0%           | 0.0%           | 0.0%           | 0.0% |
| tr F1SGN5 F1SGN5       |         | 2             | 0          | 0          | 0              | 0              | 0              | 0              | 2              | 0          | 0          | 0              | 0              | 0              | 0              | 4.0%              | 0.0%       | 0.0%       | 0.0%           | 0.0%           | 0.0%           | 0.0%           | 0.0% |
| tr K7GPP3 K7GPP3       |         | 1             | 0          | 0          | 0              | 0              | 0              | 0              | 2              | 0          | 0          | 0              | 0              | 0              | 0              | 15.8%             | 0.0%       | 0.0%       | 0.0%           | 0.0%           | 0.0%           | 0.0%           | 0.0% |
| tr F1RJL6 F1RJL6       |         | 2             | 0          | 0          |                |                |                |                |                |            |            |                |                |                |                |                   |            |            |                |                |                |                |      |





| Accession        | Sample# | Peptide Count |            |            |                |                |                |                | Spectral Count |            |            |            |                |                |                |                | Sequence Coverage |            |            |            |                |                |                |                |                |
|------------------|---------|---------------|------------|------------|----------------|----------------|----------------|----------------|----------------|------------|------------|------------|----------------|----------------|----------------|----------------|-------------------|------------|------------|------------|----------------|----------------|----------------|----------------|----------------|
|                  |         | Whole Cell    | Whole Cell | Whole Cell | Cilia Fraction | Whole Cell | Whole Cell | Whole Cell | Cilia Fraction    | Whole Cell | Whole Cell | Whole Cell | Cilia Fraction |
|                  |         | 1             | 2          | 6          | 4              | 3              | 5              | 7              | 8              | 1          | 2          | 6          | 4              | 3              | 5              | 7              | 8                 | 1          | 2          | 6          | 4              | 3              | 5              | 7              | 8              |
| tr I3LG34 I3LG34 |         | 1             | 0          | 4          | 0              | 0              | 0              | 0              | 0              | 2          | 0          | 7          | 0              | 0              | 0              | 0              | 0                 | 1.9%       | 0.0%       | 3.3%       | 0.0%           | 0.0%           | 0.0%           | 0.0%           | 0.0%           |
| tr F2Z5D8 F2Z5D8 |         | 1             | 1          | 2          | 0              | 0              | 0              | 0              | 0              | 1          | 1          | 7          | 0              | 0              | 0              | 0              | 0                 | 1.9%       | 1.9%       | 5.8%       | 0.0%           | 0.0%           | 0.0%           | 0.0%           | 0.0%           |
| tr F1RY70 F1RY70 |         | 2             | 0          | 1          | 0              | 0              | 0              | 0              | 0              | 2          | 0          | 7          | 0              | 0              | 0              | 0              | 0                 | 17.2%      | 0.0%       | 10.0%      | 0.0%           | 0.0%           | 0.0%           | 0.0%           | 0.0%           |
| tr F1S9I6 F1S9I6 |         | 1             | 0          | 1          | 0              | 0              | 0              | 0              | 0              | 2          | 0          | 8          | 0              | 0              | 0              | 0              | 0                 | 7.6%       | 0.0%       | 7.6%       | 0.0%           | 0.0%           | 0.0%           | 0.0%           | 0.0%           |
| tr F1S1R4 F1S1R4 |         | 0             | 1          | 2          | 0              | 0              | 0              | 0              | 0              | 0          | 2          | 8          | 0              | 0              | 0              | 0              | 0                 | 0.0%       | 12.1%      | 16.2%      | 0.0%           | 0.0%           | 0.0%           | 0.0%           | 0.0%           |
| tr F1RGX3 F1RGX3 |         | 2             | 0          | 2          | 0              | 0              | 0              | 0              | 0              | 2          | 0          | 8          | 0              | 0              | 0              | 0              | 0                 | 7.0%       | 0.0%       | 4.9%       | 0.0%           | 0.0%           | 0.0%           | 0.0%           | 0.0%           |
| tr F1S413 F1S413 |         | 2             | 0          | 1          | 0              | 0              | 0              | 0              | 0              | 2          | 0          | 9          | 0              | 0              | 0              | 0              | 0                 | 7.6%       | 0.0%       | 3.0%       | 0.0%           | 0.0%           | 0.0%           | 0.0%           | 0.0%           |
| tr F1RMA6 F1RMA6 |         | 1             | 1          | 3          | 0              | 0              | 0              | 0              | 0              | 1          | 1          | 9          | 0              | 0              | 0              | 0              | 0                 | 1.5%       | 1.4%       | 5.5%       | 0.0%           | 0.0%           | 0.0%           | 0.0%           | 0.0%           |
| tr F1REW9 F1REW9 |         | 1             | 0          | 3          | 0              | 0              | 0              | 0              | 0              | 2          | 0          | 9          | 0              | 0              | 0              | 0              | 0                 | 10.9%      | 0.0%       | 24.8%      | 0.0%           | 0.0%           | 0.0%           | 0.0%           | 0.0%           |
| tr F1S2A8 F1S2A8 |         | 2             | 0          | 4          | 0              | 0              | 0              | 0              | 0              | 2          | 0          | 9          | 0              | 0              | 0              | 0              | 0                 | 11.8%      | 0.0%       | 16.3%      | 0.0%           | 0.0%           | 0.0%           | 0.0%           | 0.0%           |
| tr F1RMR5 F1RMR5 |         | 1             | 0          | 2          | 0              | 0              | 0              | 0              | 0              | 2          | 0          | 10         | 0              | 0              | 0              | 0              | 0                 | 10.5%      | 0.0%       | 19.5%      | 0.0%           | 0.0%           | 0.0%           | 0.0%           | 0.0%           |
| tr Q06A99 Q06A99 |         | 1             | 1          | 2          | 0              | 0              | 0              | 0              | 0              | 1          | 1          | 10         | 0              | 0              | 0              | 0              | 0                 | 1.8%       | 1.8%       | 4.3%       | 0.0%           | 0.0%           | 0.0%           | 0.0%           | 0.0%           |
| tr I3LSZ1 I3LSZ1 |         | 2             | 0          | 2          | 0              | 0              | 0              | 0              | 0              | 2          | 0          | 10         | 0              | 0              | 0              | 0              | 0                 | 27.8%      | 0.0%       | 8.2%       | 0.0%           | 0.0%           | 0.0%           | 0.0%           | 0.0%           |
| tr K7GKR9 K7GKR9 |         | 0             | 1          | 2          | 0              | 0              | 0              | 0              | 0              | 0          | 2          | 11         | 0              | 0              | 0              | 0              | 0                 | 0.0%       | 7.1%       | 11.7%      | 0.0%           | 0.0%           | 0.0%           | 0.0%           | 0.0%           |
| tr F1SQN5 F1SQN5 |         | 2             | 0          | 3          | 0              | 0              | 0              | 0              | 0              | 2          | 0          | 11         | 0              | 0              | 0              | 0              | 0                 | 17.4%      | 0.0%       | 22.9%      | 0.0%           | 0.0%           | 0.0%           | 0.0%           | 0.0%           |
| tr K7GNR2 K7GNR2 |         | 0             | 1          | 2          | 0              | 0              | 0              | 0              | 0              | 0          | 2          | 11         | 0              | 0              | 0              | 0              | 0                 | 0.0%       | 10.9%      | 17.8%      | 0.0%           | 0.0%           | 0.0%           | 0.0%           | 0.0%           |
| tr K7GQ39 K7GQ39 |         | 0             | 1          | 2          | 0              | 0              | 0              | 0              | 0              | 0          | 2          | 11         | 0              | 0              | 0              | 0              | 0                 | 0.0%       | 13.9%      | 22.8%      | 0.0%           | 0.0%           | 0.0%           | 0.0%           | 0.0%           |
| tr I3LAQ2 I3LAQ2 |         | 2             | 0          | 3          | 0              | 0              | 0              | 0              | 0              | 2          | 0          | 11         | 0              | 0              | 0              | 0              | 0                 | 17.4%      | 0.0%       | 22.9%      | 0.0%           | 0.0%           | 0.0%           | 0.0%           | 0.0%           |
| tr K7GL60 K7GL60 |         | 2             | 0          | 3          | 0              | 0              | 0              | 0              | 0              | 2          | 0          | 11         | 0              | 0              | 0              | 0              | 0                 | 21.6%      | 0.0%       | 28.4%      | 0.0%           | 0.0%           | 0.0%           | 0.0%           | 0.0%           |
| tr K7GMF5 K7GMF5 |         | 0             | 1          | 2          | 0              | 0              | 0              | 0              | 0              | 0          | 2          | 11         | 0              | 0              | 0              | 0              | 0                 | 0.0%       | 17.5%      | 28.8%      | 0.0%           | 0.0%           | 0.0%           | 0.0%           | 0.0%           |
| tr F1SNF6 F1SNF6 |         | 1             | 0          | 2          | 0              | 0              | 0              | 0              | 0              | 2          | 0          | 12         | 0              | 0              | 0              | 0              | 0                 | 8.8%       | 0.0%       | 11.9%      | 0.0%           | 0.0%           | 0.0%           | 0.0%           | 0.0%           |
| tr F1RK10 F1RK10 |         | 1             | 1          | 2          | 0              | 0              | 0              | 0              | 0              | 1          | 1          | 16         | 0              | 0              | 0              | 0              | 0                 | 5.6%       | 2.4%       | 7.8%       | 0.0%           | 0.0%           | 0.0%           | 0.0%           | 0.0%           |
| tr F1SM81 F1SM81 |         | 1             | 0          | 3          | 0              | 0              | 0              | 0              | 0              | 2          | 0          | 16         | 0              | 0              | 0              | 0              | 0                 | 4.1%       | 0.0%       | 13.9%      | 0.0%           | 0.0%           | 0.0%           | 0.0%           | 0.0%           |
| O97580           |         | 1             | 1          | 2          | 0              | 0              | 0              | 0              | 0              | 1          | 1          | 16         | 0              | 0              | 0              | 0              | 0                 | 6.1%       | 2.6%       | 8.5%       | 0.0%           | 0.0%           | 0.0%           | 0.0%           | 0.0%           |
| tr F1RUT1 F1RUT1 |         | 2             | 0          | 3          | 0              | 0              | 0              | 0              | 0              | 2          | 0          | 18         | 0              | 0              | 0              | 0              | 0                 | 11.2%      | 0.0%       | 10.7%      | 0.0%           | 0.0%           | 0.0%           | 0.0%           | 0.0%           |
| tr A6N8P5 A6N8P5 |         | 2             | 0          | 2          | 0              | 0              | 0              | 0              | 0              | 2          | 0          | 21         | 0              | 0              | 0              | 0              | 0                 | 14.9%      | 0.0%       | 10.1%      | 0.0%           | 0.0%           | 0.0%           | 0.0%           | 0.0%           |
| tr I3LEL7 I3LEL7 |         | 1             | 0          | 2          | 0              | 0              | 0              | 0              | 0              | 2          | 0          | 23         | 0              | 0              | 0              | 0              | 0                 | 14.3%      | 0.0%       | 25.5%      | 0.0%           | 0.0%           | 0.0%           | 0.0%           | 0.0%           |
| tr F1SLC2 F1SLC2 |         | 1             | 0          | 2          | 0              | 0              | 0              | 0              | 0              | 2          | 0          | 59         | 0              | 0              | 0              | 0              | 0                 | 7.7%       | 0.0%       | 16.2%      | 0.0%           | 0.0%           | 0.0%           | 0.0%           | 0.0%           |
| tr F1RT53 F1RT53 |         | 1             | 0          | 0          | 0              | 0              | 0              | 2              | 10             | 1          | 0          | 0          | 0              | 0              | 0              | 6              | 71                | 3.9%       | 0.0%       | 0.0%       | 0.0%           | 0.0%           | 0.0%           | 8.6%           | 23.8%          |
| tr F1S2B2 F1S2B2 |         | 1             | 0          | 0          | 0              | 0              | 0              | 2              | 3              | 1          | 0          | 0          | 0              | 0              | 0              | 8              | 50                | 1.1%       | 0.0%       | 0.0%       | 0.0%           | 0.0%           | 0.0%           | 1.7%           | 4.1%           |
| tr I3LP99 I3LP99 |         | 1             | 0          | 0          | 0              | 0              | 0              | 1              | 1              | 1          | 0          | 0          | 0              | 0              | 0              | 35             | 19                | 14.5%      | 0.0%       | 0.0%       | 0.0%           | 0.0%           | 0.0%           | 14.5%          | 14.5%          |
| tr K7GR94 K7GR94 |         | 1             | 0          | 0          | 0              | 0              | 0              | 1              | 9              | 1          | 0          | 0          | 0              | 0              | 0              | 1              | 45                | 5.7%       | 0.0%       | 0.0%       | 0.0%           | 0.0%           | 0.0%           | 4.8%           | 37.2%          |
| tr F1RMT1 F1RMT1 |         | 1             | 0          | 0          | 0              | 0              | 0              | 1              | 9              | 1          | 0          | 0          | 0              | 0              | 0              | 1              | 45                | 4.9%       | 0.0%       | 0.0%       | 0.0%           | 0.0%           | 0.0%           | 4.1%           | 32.1%          |
| tr F1S4K9 F1S4K9 |         | 1             | 0          | 0          | 0              | 0              | 0              | 3              | 4              | 1          | 0          | 0          | 0              | 0              | 0              | 11             | 31                | 4.4%       | 0.0%       | 0.0%       | 0.0%           | 0.0%           | 0.0%           | 26.8%          | 34.9%          |
| tr I3LSX3 I3LSX3 |         | 1             | 0          | 0          | 0              | 0              | 0              | 0              | 6              | 1          | 0          | 0          | 0              | 0              | 0              | 0              | 38                | 4.5%       | 0.0%       | 0.0%       | 0.0%           | 0.0%           | 0.0%           | 0.0%           | 38.2%          |
| tr F1RIR2 F1RIR2 |         | 1             | 0          | 0          | 0              | 0              | 0              | 1              | 4              | 1          | 0          | 0          | 0              | 0              | 0              | 5              | 29                | 3.7%       | 0.0%       | 0.0%       | 0.0%           | 0.0%           | 0.0%           | 10.1%          | 19.2%          |
| tr F1SB08 F1SB08 |         | 1             | 0          | 0          | 0              | 0              | 0              | 2              | 5              | 1          | 0          | 0          | 0              | 0              | 0              | 5              | 29                | 0.3%       | 0.0%       | 0.0%       | 0.0%           | 0.0%           | 0.0%           | 2.8%           | 6.3%           |
| tr F1RMX5 F1RMX5 |         | 1             | 0          | 0          | 0              | 0              | 0              | 2              | 6              | 1          | 0          | 0          | 0              | 0              | 0              | 2              | 30                | 1.6%       | 0.0%       | 0.0%       | 0.0%           | 0.0%           | 0.0%           | 3.1%           | 12.2%          |
| tr I3LHI3 I3LHI3 |         | 1             | 0          | 0          | 0              | 0              | 0              | 1              | 1              | 1          | 0          | 0          | 0              | 0              | 0              | 5              | 25                | 6.7%       | 0.0%       | 0.0%       | 0.0%           | 0.0%           | 0.0%           | 6.7%           | 6.7%           |
| tr F1SIT8 F1SIT8 |         | 1             | 0          | 0          | 0              | 0              | 0              | 6              | 1              | 1          | 0          | 0          | 0              | 0              | 0              | 23             | 4                 | 2.6%       | 0.0%       | 0.0%       | 0.0%           | 0.0%           | 0.0%           | 10.2%          | 1.7%           |
| O02839           |         | 1             | 0          | 0          | 0              | 0              | 0              | 0              | 4              | 1          | 0          | 0          | 0              | 0              | 0              | 0              | 26                | 3.6%       | 0.0%       | 0.0%       | 0.0%           | 0.0%           | 0.0%           | 0.0%           | 16.3%          |
| Q6PQ21           |         | 1             | 0          | 1          | 0              | 0              | 2              | 6              | 1              | 1          | 0          | 1          | 0              | 0              | 0              | 14             | 32                | 12.2%      | 0.0%       | 7.4%       | 0.0%           | 0.0%           | 0.0%           | 8.1%           | 18.1%          |
| tr D3K5K6 D3K5K6 |         | 1             | 0          | 0          | 0              | 0              | 0              | 2              | 2              | 1          | 0          | 0          | 0              | 0              | 0              | 2              | 20                | 1.7%       | 0.0%       | 0.0%       | 0.0%           | 0.0%           | 0.0%           | 3.2%           | 2.7%           |
| tr I3L7R2 I3L7R2 |         | 1             | 0          | 0          | 0              | 0              | 0              | 1              | 2              | 1          | 0          | 0          | 0              | 0              | 0              | 1              | 20                | 5.1%       | 0.0%       | 0.0%       | 0.0%           | 0.0%           | 0.0%           | 5.1%           | 8.3%           |
| tr B6EUU6 B6EUU6 |         | 1             | 0          | 0          | 0              | 0              | 0              | 1              | 1              | 1          | 0          | 0          | 0              | 0              | 0              | 9              | 9                 | 4.5%       | 0.0%       | 0.0%       | 0.0%           | 0.0%           | 0.0%           | 8.5%           | 4.5%           |
| P23220           |         | 1             | 0          | 3          | 0              | 0              | 0              | 6              | 12             | 1          | 0          | 5          | 0              | 0              | 0              | 21             | 86                | 0.9%       | 0.0%       | 5.7%       | 0.0%           | 0.0%           | 0.0%           | 7.2%           | 16.9%          |
| tr F1SPZ4 F1SPZ4 |         | 1             | 0          | 3          | 0              | 0              | 0              | 6              | 11             | 1          | 0          | 5          | 0              | 0              | 0              | 21             | 82                | 1.0%       | 0.0%       | 6.4%       | 0.0%           | 0.0%           | 0.0%           | 8.0%           | 16.6%          |
| tr K7GSX5 K7GSX5 |         | 1             | 0          | 1          | 0              | 0              | 0              | 0              | 8              | 1          | 0          | 3          | 0              | 0              | 0              | 0              | 60                | 3.8%       | 0.0%       | 2.4%       | 0.0%           | 0.0%           | 0.0%           | 0.0%           | 18.9%          |
| tr I3LU77 I3LU77 |         | 1             | 0          | 0          | 0              | 0              | 0              | 0              | 5              | 1          | 0          | 0          | 0              | 0              | 0              | 0              | 13                | 2.1%       | 0.0%       | 0.0%       | 0.0%           | 0.0%           | 0.0%           | 0.0%           | 13.9%          |
| tr F1SIB1 F1SIB1 |         | 1             | 0          | 0          | 0              | 0              | 0              | 3              | 2              | 1          | 0          | 0          | 0              | 0              | 0              | 6              | 6                 | 1.4%       | 0.0%       | 0.0%       | 0.0%           | 0.0%           | 0.0%           | 5.0%           | 2.6%           |
| Q19AZ8           |         | 1             | 0          | 0          | 0              | 0              | 0              | 3              | 2              | 1          | 0          | 0          | 0              | 0              | 0              | 6              | 6                 | 1.4%       | 0.0%       | 0.0%       | 0.0%           | 0.0%           | 0.0%           | 5.0%           | 2.6%           |
| tr F1RVJ7 F1RVJ7 |         | 0             | 1          | 0          | 0              | 0              | 0              | 0              | 4              | 0          | 1          | 0          | 0              | 0              | 0              | 0              | 10                | 0.0%       | 3.0%       | 0.0%       | 0.0%           | 0.0%           | 0.0%           | 0.0%           | 13.8%          |
| tr I3LD20 I3LD20 |         | 1             | 0          | 2          | 0              | 0              | 0              | 0              | 5              | 1          | 0          | 4          | 0              | 0              | 0              | 0              | 43                | 1.7%       | 0.0%       | 5.4%       | 0.0%           | 0.0%           | 0.0%           | 0.0%           | 9.0%           |
| tr F1RTL4 F1RTL4 |         | 1             | 0          | 1          | 0              | 0              | 0              | 1              | 4              | 1          | 0          | 1          | 0              | 0              | 0              | 1              | 16                | 3.8%       | 0.0%       | 3.3%       | 0.0%           | 0.0%           | 0.0%           | 2.5%           | 16.5%          |
| tr I3LM05 I3LM05 |         | 0             | 1          | 1          | 0              | 0              | 0              | 2              | 5              | 0          | 1          | 1          | 0              | 0              | 0              | 2              | 14                | 0.0%       | 5.1%       | 4.8%       | 0.0%           | 0.0%           | 0.0%           | 11.3%          | 27.5%          |
| tr F1STU6 F1STU6 |         | 1             | 0          | 0          | 0              | 0              | 0              | 1              | 1              | 1          | 0          | 0          | 0              | 0              | 0              | 1              | 7                 | 10.2%      | 0.0%       | 0.0%       | 0.0%           | 0.0%           | 0.0%           | 5.1%           | 5.1%           |
| tr F1STL1 F1STL1 |         | 1             | 0          | 0          | 0              | 0              | 0              | 1              | 1              | 1          | 0          | 0          | 0              | 0              | 0              | 3              | 5                 | 5.6%       | 0.0%       | 0.0%       | 0.0%           | 0.0%           | 0.0%           | 5.2%           | 5.2%           |
| tr I3LSL7 I3LSL7 |         | 1             | 0          | 0          | 0              | 0              | 0              | 0              | 1              | 1          | 0          | 0          | 0              | 0              | 0              | 0              | 7                 | 12.4%      | 0.0%       | 0.0%       | 0.0%           | 0.0%           | 0.0%           | 0.0%           | 12.4%          |
| tr I3L9X0 I3L9X0 |         | 1             | 0          | 0          | 0              | 0              | 0              | 0              | 1              | 1          | 0          | 0          | 0              | 0              | 0              | 0              | 6                 | 2.7%       | 0.0%       | 0.0%       | 0.0%           | 0.0%           | 0.0%           | 0.0%           | 2.7%           |
| tr F1RL45 F1RL45 |         | 1             | 0          | 0          | 0              | 0              | 0              | 0              | 1              | 1          | 0          | 0          | 0              | 0              | 0              | 0              | 6                 | 7.0%       | 0.0%       | 0.0%       | 0.0%           | 0.0%           | 0.0%           | 0.0%           | 11.1%          |
| tr I3LQY3 I3LQY3 |         | 1             | 0          | 0          | 0              | 0              | 0              | 0              | 1              | 1          | 0          | 0          | 0              | 0              | 0              | 0              | 6                 | 2.5%       | 0.0%       | 0.0%       | 0.0%           | 0.0%           | 0.0%           | 0.0%           | 2.5%           |
| tr F1SE25 F1SE25 |         | 1             | 0          | 0          | 0              | 0              | 0              | 0              | 2              | 1          | 0          | 0          | 0              | 0              | 0              | 0              | 6                 | 7.6%       | 0.0%       | 0.0%       | 0.0%           | 0.0%           | 0.0%           | 0.0%           | 10.6%          |
| tr F1RMA9 F1RMA9 |         | 1             | 0          | 0          | 0              | 0              |                |                |                |            |            |            |                |                |                |                |                   |            |            |            |                |                |                |                |                |

| Accession                | Sample# | Peptide Count |            |            |                |                |                |                | Spectral Count |            |            |            |                |                |                |                | Sequence Coverage |            |            |            |                |                |                |                |                |
|--------------------------|---------|---------------|------------|------------|----------------|----------------|----------------|----------------|----------------|------------|------------|------------|----------------|----------------|----------------|----------------|-------------------|------------|------------|------------|----------------|----------------|----------------|----------------|----------------|
|                          |         | Whole Cell    | Whole Cell | Whole Cell | Cilia Fraction | Whole Cell | Whole Cell | Whole Cell | Cilia Fraction    | Whole Cell | Whole Cell | Whole Cell | Cilia Fraction |
|                          |         | 1             | 2          | 6          | 4              | 3              | 5              | 7              | 8              | 1          | 2          | 6          | 4              | 3              | 5              | 7              | 8                 | 1          | 2          | 6          | 4              | 3              | 5              | 7              | 8              |
| tr I3L6A7 I3L6A7         |         | 1             | 0          | 1          | 0              | 0              | 0              | 0              | 2              | 1          | 0          | 1          | 0              | 0              | 0              | 0              | 6                 | 7.8%       | 0.0%       | 7.0%       | 0.0%           | 0.0%           | 0.0%           | 0.0%           | 18.4%          |
| Q35916                   |         | 1             | 0          | 0          | 0              | 0              | 0              | 0              | 1              | 1          | 0          | 0          | 0              | 0              | 0              | 0              | 3                 | 5.4%       | 0.0%       | 0.0%       | 0.0%           | 0.0%           | 0.0%           | 0.0%           | 5.4%           |
| tr F1RIA5 F1RIA5         |         | 1             | 0          | 0          | 0              | 0              | 0              | 0              | 1              | 1          | 0          | 0          | 0              | 0              | 0              | 0              | 3                 | 5.3%       | 0.0%       | 0.0%       | 0.0%           | 0.0%           | 0.0%           | 0.0%           | 5.3%           |
| tr F1RG61 F1RG61         |         | 1             | 0          | 0          | 0              | 0              | 0              | 0              | 1              | 1          | 0          | 0          | 0              | 0              | 0              | 0              | 3                 | 2.3%       | 0.0%       | 0.0%       | 0.0%           | 0.0%           | 0.0%           | 0.0%           | 3.4%           |
| tr I3LEN0 I3LEN0         |         | 1             | 0          | 0          | 0              | 0              | 0              | 1              | 1              | 1          | 0          | 0          | 0              | 0              | 0              | 2              | 1                 | 35.1%      | 0.0%       | 0.0%       | 0.0%           | 0.0%           | 0.0%           | 35.1%          | 35.1%          |
| tr I3LP32 I3LP32         |         | 1             | 0          | 0          | 0              | 0              | 0              | 0              | 1              | 1          | 0          | 0          | 0              | 0              | 0              | 0              | 3                 | 21.6%      | 0.0%       | 0.0%       | 0.0%           | 0.0%           | 0.0%           | 0.0%           | 16.5%          |
| tr K7GSJ4 K7GSJ4         |         | 1             | 0          | 1          | 0              | 0              | 0              | 0              | 2              | 1          | 0          | 3          | 0              | 0              | 0              | 0              | 10                | 33.6%      | 0.0%       | 19.3%      | 0.0%           | 0.0%           | 0.0%           | 0.0%           | 33.6%          |
| tr K7GLY9 K7GLY9         |         | 1             | 0          | 1          | 0              | 0              | 0              | 0              | 3              | 1          | 0          | 5          | 0              | 0              | 0              | 0              | 14                | 14.0%      | 0.0%       | 8.4%       | 0.0%           | 0.0%           | 0.0%           | 0.0%           | 36.5%          |
| tr F1SR85 F1SR85         |         | 1             | 0          | 1          | 0              | 0              | 0              | 0              | 4              | 1          | 0          | 2          | 0              | 0              | 0              | 0              | 7                 | 2.6%       | 0.0%       | 3.1%       | 0.0%           | 0.0%           | 0.0%           | 0.0%           | 5.0%           |
| tr K7GM94 K7GM94         |         | 1             | 0          | 1          | 0              | 0              | 0              | 0              | 3              | 1          | 0          | 4          | 0              | 0              | 0              | 0              | 10                | 9.1%       | 0.0%       | 11.0%      | 0.0%           | 0.0%           | 0.0%           | 0.0%           | 14.0%          |
| tr F1SQU2 F1SQU2         |         | 1             | 0          | 1          | 0              | 0              | 0              | 1              | 1              | 1          | 0          | 1          | 0              | 0              | 0              | 1              | 3                 | 4.0%       | 0.0%       | 4.0%       | 0.0%           | 0.0%           | 0.0%           | 5.5%           | 5.5%           |
| tr F1SKS4 F1SKS4         |         | 1             | 0          | 0          | 0              | 0              | 0              | 0              | 2              | 1          | 0          | 0          | 0              | 0              | 0              | 0              | 2                 | 5.5%       | 0.0%       | 0.0%       | 0.0%           | 0.0%           | 0.0%           | 0.0%           | 16.7%          |
| tr F1SRN4 F1SRN4         |         | 1             | 0          | 0          | 0              | 0              | 0              | 0              | 1              | 1          | 0          | 0          | 0              | 0              | 0              | 0              | 2                 | 2.2%       | 0.0%       | 0.0%       | 0.0%           | 0.0%           | 0.0%           | 0.0%           | 1.8%           |
| tr I3L8J2 I3L8J2         |         | 1             | 0          | 0          | 0              | 0              | 0              | 0              | 1              | 1          | 0          | 0          | 0              | 0              | 0              | 0              | 2                 | 8.1%       | 0.0%       | 0.0%       | 0.0%           | 0.0%           | 0.0%           | 0.0%           | 12.8%          |
| tr I3LIV0 I3LIV0         |         | 1             | 0          | 0          | 0              | 0              | 0              | 0              | 1              | 1          | 0          | 0          | 0              | 0              | 0              | 0              | 2                 | 8.1%       | 0.0%       | 0.0%       | 0.0%           | 0.0%           | 0.0%           | 0.0%           | 12.8%          |
| tr I3LG98 I3LG98         |         | 1             | 0          | 0          | 0              | 0              | 0              | 0              | 1              | 1          | 0          | 0          | 0              | 0              | 0              | 0              | 2                 | 6.6%       | 0.0%       | 0.0%       | 0.0%           | 0.0%           | 0.0%           | 0.0%           | 9.8%           |
| tr F1RPP6 F1RPP6         |         | 1             | 0          | 0          | 0              | 0              | 0              | 0              | 1              | 1          | 0          | 0          | 0              | 0              | 0              | 0              | 2                 | 17.4%      | 0.0%       | 0.0%       | 0.0%           | 0.0%           | 0.0%           | 0.0%           | 17.4%          |
| tr F2Z4Z5 F2Z4Z5         |         | 1             | 0          | 0          | 0              | 0              | 0              | 0              | 1              | 1          | 0          | 0          | 0              | 0              | 0              | 0              | 2                 | 5.6%       | 0.0%       | 0.0%       | 0.0%           | 0.0%           | 0.0%           | 0.0%           | 8.5%           |
| tr F1RKE8 F1RKE8         |         | 1             | 0          | 0          | 0              | 0              | 0              | 0              | 2              | 1          | 0          | 0          | 0              | 0              | 0              | 0              | 2                 | 5.6%       | 0.0%       | 0.0%       | 0.0%           | 0.0%           | 0.0%           | 0.0%           | 11.7%          |
| tr F1SMV1 F1SMV1         |         | 1             | 0          | 0          | 0              | 0              | 0              | 0              | 1              | 1          | 0          | 0          | 0              | 0              | 0              | 0              | 2                 | 5.6%       | 0.0%       | 0.0%       | 0.0%           | 0.0%           | 0.0%           | 0.0%           | 5.6%           |
| tr F1S2V7 F1S2V7         |         | 0             | 1          | 0          | 0              | 0              | 0              | 0              | 1              | 0          | 1          | 0          | 0              | 0              | 0              | 0              | 2                 | 0.0%       | 3.3%       | 0.0%       | 0.0%           | 0.0%           | 0.0%           | 0.0%           | 3.1%           |
| tr I3LSH9 I3LSH9         |         | 1             | 0          | 2          | 0              | 0              | 0              | 1              | 2              | 1          | 0          | 2          | 0              | 0              | 0              | 3              | 2                 | 1.8%       | 0.0%       | 2.5%       | 0.0%           | 0.0%           | 0.0%           | 2.4%           | 5.1%           |
| tr F1SA61 F1SA61         |         | 1             | 0          | 2          | 0              | 0              | 0              | 1              | 2              | 1          | 0          | 2          | 0              | 0              | 0              | 3              | 2                 | 2.0%       | 0.0%       | 2.7%       | 0.0%           | 0.0%           | 0.0%           | 2.6%           | 5.6%           |
| tr F1RMA7 F1RMA7         |         | 1             | 0          | 1          | 0              | 0              | 0              | 1              | 1              | 1          | 0          | 1          | 0              | 0              | 0              | 1              | 2                 | 5.8%       | 0.0%       | 2.8%       | 0.0%           | 0.0%           | 0.0%           | 5.8%           | 5.8%           |
| tr K7GMT0 K7GMT0         |         | 0             | 1          | 1          | 0              | 0              | 0              | 0              | 1              | 0          | 1          | 1          | 0              | 0              | 0              | 0              | 3                 | 0.0%       | 2.4%       | 1.9%       | 0.0%           | 0.0%           | 0.0%           | 0.0%           | 4.5%           |
| tr Q9GJV4 Q9GJV4         |         | 0             | 1          | 1          | 0              | 0              | 0              | 1              | 1              | 0          | 1          | 2          | 0              | 0              | 0              | 3              | 1                 | 0.0%       | 3.4%       | 5.1%       | 0.0%           | 0.0%           | 0.0%           | 8.8%           | 4.4%           |
| tr F1SGD2 F1SGD2         |         | 1             | 0          | 1          | 0              | 0              | 0              | 1              | 1              | 1          | 0          | 2          | 0              | 0              | 0              | 2              | 2                 | 1.7%       | 0.0%       | 2.8%       | 0.0%           | 0.0%           | 0.0%           | 1.7%           | 1.7%           |
| tr K7GS06 K7GS06         |         | 0             | 1          | 1          | 0              | 0              | 0              | 1              | 1              | 0          | 1          | 2          | 0              | 0              | 0              | 3              | 1                 | 0.0%       | 3.6%       | 5.4%       | 0.0%           | 0.0%           | 0.0%           | 9.3%           | 4.6%           |
| tr F1SA12 F1SA12         |         | 1             | 0          | 1          | 0              | 0              | 0              | 1              | 1              | 1          | 0          | 8          | 0              | 0              | 0              | 2              | 8                 | 9.0%       | 0.0%       | 9.0%       | 0.0%           | 0.0%           | 0.0%           | 9.0%           | 9.0%           |
| A7WLI0                   |         | 1             | 0          | 2          | 0              | 0              | 0              | 1              | 1              | 1          | 0          | 10         | 0              | 0              | 0              | 9              | 3                 | 14.7%      | 0.0%       | 14.7%      | 0.0%           | 0.0%           | 0.0%           | 14.7%          | 14.7%          |
| tr I3LSX4 I3LSX4         |         | 1             | 0          | 1          | 0              | 0              | 0              | 0              | 1              | 1          | 0          | 3          | 0              | 0              | 0              | 0              | 4                 | 34.5%      | 0.0%       | 41.4%      | 0.0%           | 0.0%           | 0.0%           | 0.0%           | 17.2%          |
| Q66X52                   |         | 1             | 0          | 1          | 0              | 0              | 0              | 0              | 1              | 1          | 0          | 3          | 0              | 0              | 0              | 0              | 4                 | 22.0%      | 0.0%       | 26.4%      | 0.0%           | 0.0%           | 0.0%           | 0.0%           | 11.0%          |
| tr F1S622 F1S622         |         | 1             | 0          | 1          | 0              | 0              | 0              | 0              | 1              | 1          | 0          | 3          | 0              | 0              | 0              | 0              | 4                 | 22.5%      | 0.0%       | 27.0%      | 0.0%           | 0.0%           | 0.0%           | 0.0%           | 11.2%          |
| tr I3LK99 I3LK99         |         | 1             | 0          | 1          | 0              | 0              | 0              | 0              | 1              | 1          | 0          | 1          | 0              | 0              | 0              | 0              | 2                 | 11.0%      | 0.0%       | 9.9%       | 0.0%           | 0.0%           | 0.0%           | 0.0%           | 11.0%          |
| tr F1S611 F1S611         |         | 1             | 0          | 1          | 0              | 0              | 0              | 0              | 1              | 1          | 0          | 1          | 0              | 0              | 0              | 0              | 2                 | 4.5%       | 0.0%       | 4.1%       | 0.0%           | 0.0%           | 0.0%           | 0.0%           | 4.5%           |
| tr I3L629 I3L629         |         | 1             | 0          | 0          | 0              | 0              | 0              | 0              | 1              | 1          | 0          | 0          | 0              | 0              | 0              | 0              | 1                 | 2.0%       | 0.0%       | 0.0%       | 0.0%           | 0.0%           | 0.0%           | 0.0%           | 2.0%           |
| tr F1SFK9 F1SFK9         |         | 1             | 0          | 0          | 0              | 0              | 0              | 0              | 1              | 1          | 0          | 0          | 0              | 0              | 0              | 0              | 1                 | 2.6%       | 0.0%       | 0.0%       | 0.0%           | 0.0%           | 0.0%           | 0.0%           | 3.2%           |
| tr K7GSH5 K7GSH5         |         | 1             | 0          | 0          | 0              | 0              | 0              | 0              | 1              | 1          | 0          | 0          | 0              | 0              | 0              | 0              | 1                 | 3.9%       | 0.0%       | 0.0%       | 0.0%           | 0.0%           | 0.0%           | 0.0%           | 7.0%           |
| tr I3LBN9 I3LBN9         |         | 0             | 1          | 0          | 0              | 0              | 0              | 1              | 0              | 0          | 1          | 0          | 0              | 0              | 0              | 0              | 1                 | 0.0%       | 3.2%       | 0.0%       | 0.0%           | 0.0%           | 0.0%           | 5.7%           | 0.0%           |
| tr F1S7Q6 F1S7Q6         |         | 1             | 0          | 0          | 0              | 0              | 0              | 0              | 1              | 1          | 0          | 0          | 0              | 0              | 0              | 0              | 1                 | 3.3%       | 0.0%       | 0.0%       | 0.0%           | 0.0%           | 0.0%           | 0.0%           | 2.3%           |
| tr F1SH88 F1SH88         |         | 1             | 0          | 0          | 0              | 0              | 0              | 1              | 0              | 1          | 0          | 0          | 0              | 0              | 0              | 1              | 0                 | 12.5%      | 0.0%       | 0.0%       | 0.0%           | 0.0%           | 0.0%           | 15.1%          | 0.0%           |
| tr I3LDB1 I3LDB1         |         | 1             | 0          | 0          | 0              | 0              | 0              | 0              | 1              | 1          | 0          | 0          | 0              | 0              | 0              | 0              | 1                 | 0.7%       | 0.0%       | 0.0%       | 0.0%           | 0.0%           | 0.0%           | 0.0%           | 1.1%           |
| tr I3LMX1 I3LMX1         |         | 1             | 0          | 0          | 0              | 0              | 0              | 0              | 1              | 1          | 0          | 0          | 0              | 0              | 0              | 0              | 1                 | 5.5%       | 0.0%       | 0.0%       | 0.0%           | 0.0%           | 0.0%           | 0.0%           | 7.0%           |
| Q95313                   |         | 1             | 0          | 0          | 0              | 0              | 0              | 0              | 1              | 1          | 0          | 0          | 0              | 0              | 0              | 0              | 1                 | 9.8%       | 0.0%       | 0.0%       | 0.0%           | 0.0%           | 0.0%           | 0.0%           | 9.8%           |
| tr I3LSR1 I3LSR1         |         | 1             | 0          | 0          | 0              | 0              | 0              | 1              | 0              | 1          | 0          | 0          | 0              | 0              | 0              | 1              | 0                 | 7.4%       | 0.0%       | 0.0%       | 0.0%           | 0.0%           | 0.0%           | 10.7%          | 0.0%           |
| tr F1RS74 F1RS74         |         | 0             | 1          | 0          | 0              | 0              | 0              | 0              | 1              | 0          | 1          | 0          | 0              | 0              | 0              | 0              | 1                 | 0.0%       | 1.5%       | 0.0%       | 0.0%           | 0.0%           | 0.0%           | 0.0%           | 4.1%           |
| Q5PXT2                   |         | 1             | 0          | 0          | 0              | 0              | 0              | 0              | 1              | 1          | 0          | 0          | 0              | 0              | 0              | 0              | 1                 | 2.5%       | 0.0%       | 0.0%       | 0.0%           | 0.0%           | 0.0%           | 0.0%           | 3.0%           |
| tr K7GPB9 K7GPB9         |         | 1             | 0          | 0          | 0              | 0              | 0              | 0              | 1              | 1          | 0          | 0          | 0              | 0              | 0              | 0              | 1                 | 4.0%       | 0.0%       | 0.0%       | 0.0%           | 0.0%           | 0.0%           | 0.0%           | 7.1%           |
| tr F1S4D4 F1S4D4         |         | 1             | 0          | 0          | 0              | 0              | 0              | 0              | 1              | 1          | 0          | 0          | 0              | 0              | 0              | 0              | 1                 | 2.7%       | 0.0%       | 0.0%       | 0.0%           | 0.0%           | 0.0%           | 0.0%           | 2.2%           |
| tr F1SCN1 F1SCN1         |         | 1             | 0          | 0          | 0              | 0              | 0              | 0              | 1              | 1          | 0          | 0          | 0              | 0              | 0              | 0              | 1                 | 6.6%       | 0.0%       | 0.0%       | 0.0%           | 0.0%           | 0.0%           | 0.0%           | 6.6%           |
| tr F1S0E8 F1S0E8         |         | 1             | 0          | 0          | 0              | 0              | 0              | 1              | 0              | 1          | 0          | 0          | 0              | 0              | 0              | 1              | 0                 | 2.1%       | 0.0%       | 0.0%       | 0.0%           | 0.0%           | 0.0%           | 2.8%           | 0.0%           |
| Reverse_tr F1S4W1 F1S4W1 |         | 1             | 0          | 0          | 0              | 0              | 0              | 1              | 0              | 1          | 0          | 0          | 0              | 0              | 0              | 1              | 0                 | 1.0%       | 0.0%       | 0.0%       | 0.0%           | 0.0%           | 0.0%           | 1.0%           | 0.0%           |
| tr I3LV53 I3LV53         |         | 1             | 0          | 0          | 0              | 0              | 0              | 0              | 1              | 1          | 0          | 0          | 0              | 0              | 0              | 0              | 1                 | 2.8%       | 0.0%       | 0.0%       | 0.0%           | 0.0%           | 0.0%           | 0.0%           | 2.8%           |
| tr A5GFW3 A5GFW3         |         | 1             | 0          | 0          | 0              | 0              | 0              | 0              | 1              | 1          | 0          | 0          | 0              | 0              | 0              | 0              | 1                 | 5.6%       | 0.0%       | 0.0%       | 0.0%           | 0.0%           | 0.0%           | 0.0%           | 2.8%           |
| tr F1RGI2 F1RGI2         |         | 0             | 1          | 0          | 0              | 0              | 0              | 0              | 1              | 0          | 1          | 0          | 0              | 0              | 0              | 0              | 1                 | 0.0%       | 3.9%       | 0.0%       | 0.0%           | 0.0%           | 0.0%           | 0.0%           | 3.9%           |
| tr I3L9F0 I3L9F0         |         | 1             | 0          | 0          | 0              | 0              | 0              | 0              | 1              | 1          | 0          | 0          | 0              | 0              | 0              | 0              | 1                 | 2.8%       | 0.0%       | 0.0%       | 0.0%           | 0.0%           | 0.0%           | 0.0%           | 2.8%           |
| tr K7GMU8 K7GMU8         |         | 1             | 0          | 0          | 0              | 0              | 0              | 0              | 1              | 1          | 0          | 0          | 0              | 0              | 0              | 0              | 1                 | 3.4%       | 0.0%       | 0.0%       | 0.0%           | 0.0%           | 0.0%           | 0.0%           | 6.1%           |
| tr F1SLF9 F1SLF9         |         | 1             | 0          | 0          | 0              | 0              | 0              | 0              | 1              | 1          | 0          | 0          | 0              | 0              | 0              | 0              | 1                 | 2.8%       | 0.0%       | 0.0%       | 0.0%           | 0.0%           | 0.0%           | 0.0%           | 4.7%           |
| tr F1S1Z3 F1S1Z3         |         | 0             | 1          | 0          | 0              | 0              | 0              | 1              | 0              | 0          | 1          | 0          | 0              | 0              | 0              | 1              | 0                 | 0.0%       | 6.2%       | 0.0%       | 0.0%           | 0.0%           | 0.0%           | 6.2%           | 0.0%           |
| tr I3LPH6 I3LPH6         |         | 1             | 0          | 0          | 0              | 0              | 0              | 0              | 1              | 1          | 0          | 0          | 0              | 0              | 0              | 0              | 1                 | 2.7%       | 0.0%       | 0.0%       | 0.0%           | 0.0%           | 0.0%           | 0.0%           | 2.7%           |
| tr F1SH49 F1SH49         |         | 0             | 1          | 0          | 0              | 0              | 0              | 0              | 1              | 0          | 1          | 0          | 0              | 0              | 0              | 0              | 1                 | 0.0%       | 4.4%       | 0.0%       | 0.0%           | 0.0%           | 0.0%           | 0.0%           | 4.4%           |
| tr F1RKG7 F1RKG7         |         | 1             | 0          | 0          | 0              | 0              | 0              | 0              | 1              | 1          | 0          | 0          | 0              | 0              | 0              | 0              | 1                 | 5.6%       | 0.0%       | 0.0%       | 0.0%           | 0.0%           | 0.0%           | 0.0%           | 5.6%           |
| tr I3LXK9 I3LXK9         |         | 1             | 0          | 0          | 0              | 0              | 0              | 0              | 1              | 1          | 0          | 0          | 0              | 0              | 0              | 0              | 1                 | 1.5%       |            |            |                |                |                |                |                |



| Sample#                  | Peptide Count    |            |            |                |                |                |                | Spectral Count |            |            |                |                |                |                | Sequence Coverage |            |            |                |                |                |                |      |
|--------------------------|------------------|------------|------------|----------------|----------------|----------------|----------------|----------------|------------|------------|----------------|----------------|----------------|----------------|-------------------|------------|------------|----------------|----------------|----------------|----------------|------|
|                          | Whole Cell       | Whole Cell | Whole Cell | Cilia Fraction | Cilia Fraction | Cilia Fraction | Cilia Fraction | Whole Cell     | Whole Cell | Whole Cell | Cilia Fraction | Cilia Fraction | Cilia Fraction | Cilia Fraction | Whole Cell        | Whole Cell | Whole Cell | Cilia Fraction | Cilia Fraction | Cilia Fraction | Cilia Fraction |      |
|                          | 1                | 2          | 6          | 4              | 3              | 5              | 7              | 1              | 2          | 6          | 4              | 3              | 5              | 7              | 1                 | 2          | 6          | 4              | 3              | 5              | 7              | 8    |
| Accession                |                  |            |            |                |                |                |                |                |            |            |                |                |                |                |                   |            |            |                |                |                |                |      |
| tr F1RV51 F1RV51         | 1                | 0          | 0          | 0              | 0              | 0              | 0              | 0              | 1          | 0          | 0              | 0              | 0              | 0              | 0                 | 4.5%       | 0.0%       | 0.0%           | 0.0%           | 0.0%           | 0.0%           | 0.0% |
| tr I3LU60 I3LU60         | 1                | 0          | 0          | 0              | 0              | 0              | 0              | 0              | 1          | 0          | 0              | 0              | 0              | 0              | 0                 | 24.7%      | 0.0%       | 0.0%           | 0.0%           | 0.0%           | 0.0%           | 0.0% |
| tr I3LPU3 I3LPU3         | 0                | 1          | 0          | 0              | 0              | 0              | 0              | 0              | 0          | 1          | 0              | 0              | 0              | 0              | 0                 | 0.0%       | 1.2%       | 0.0%           | 0.0%           | 0.0%           | 0.0%           | 0.0% |
| tr F1S6B5 F1S6B5         | 1                | 0          | 0          | 0              | 0              | 0              | 0              | 0              | 1          | 0          | 0              | 0              | 0              | 0              | 0                 | 7.7%       | 0.0%       | 0.0%           | 0.0%           | 0.0%           | 0.0%           | 0.0% |
| tr F1RN09 F1RN09         | 0                | 1          | 0          | 0              | 0              | 0              | 0              | 0              | 0          | 1          | 0              | 0              | 0              | 0              | 0                 | 0.0%       | 5.6%       | 0.0%           | 0.0%           | 0.0%           | 0.0%           | 0.0% |
| tr I3LIQ3 I3LIQ3         | 1                | 0          | 0          | 0              | 0              | 0              | 0              | 0              | 1          | 0          | 0              | 0              | 0              | 0              | 0                 | 5.4%       | 0.0%       | 0.0%           | 0.0%           | 0.0%           | 0.0%           | 0.0% |
| tr F1SAQ9 F1SAQ9         | 1                | 0          | 0          | 0              | 0              | 0              | 0              | 0              | 1          | 0          | 0              | 0              | 0              | 0              | 0                 | 23.7%      | 0.0%       | 0.0%           | 0.0%           | 0.0%           | 0.0%           | 0.0% |
| tr I3LGW8 I3LGW8         | 1                | 0          | 0          | 0              | 0              | 0              | 0              | 0              | 1          | 0          | 0              | 0              | 0              | 0              | 0                 | 3.8%       | 0.0%       | 0.0%           | 0.0%           | 0.0%           | 0.0%           | 0.0% |
| tr K7GMT3 K7GMT3         | 1                | 0          | 0          | 0              | 0              | 0              | 0              | 0              | 1          | 0          | 0              | 0              | 0              | 0              | 0                 | 4.1%       | 0.0%       | 0.0%           | 0.0%           | 0.0%           | 0.0%           | 0.0% |
| tr I3LHX0 I3LHX0         | 1                | 0          | 0          | 0              | 0              | 0              | 0              | 0              | 1          | 0          | 0              | 0              | 0              | 0              | 0                 | 5.9%       | 0.0%       | 0.0%           | 0.0%           | 0.0%           | 0.0%           | 0.0% |
| tr K7GNP2 K7GNP2         | 0                | 1          | 0          | 0              | 0              | 0              | 0              | 0              | 0          | 1          | 0              | 0              | 0              | 0              | 0                 | 0.0%       | 0.8%       | 0.0%           | 0.0%           | 0.0%           | 0.0%           | 0.0% |
| tr I3LA14 I3LA14         | 0                | 1          | 0          | 0              | 0              | 0              | 0              | 0              | 0          | 1          | 0              | 0              | 0              | 0              | 0                 | 0.0%       | 9.5%       | 0.0%           | 0.0%           | 0.0%           | 0.0%           | 0.0% |
| tr F1SUG6 F1SUG6         | 0                | 1          | 0          | 0              | 0              | 0              | 0              | 0              | 0          | 1          | 0              | 0              | 0              | 0              | 0                 | 0.0%       | 1.4%       | 0.0%           | 0.0%           | 0.0%           | 0.0%           | 0.0% |
| tr F1RK85 F1RK85         | 1                | 0          | 0          | 0              | 0              | 0              | 0              | 0              | 1          | 0          | 0              | 0              | 0              | 0              | 0                 | 1.4%       | 0.0%       | 0.0%           | 0.0%           | 0.0%           | 0.0%           | 0.0% |
| tr I3L873 I3L873         | 1                | 0          | 0          | 0              | 0              | 0              | 0              | 0              | 1          | 0          | 0              | 0              | 0              | 0              | 0                 | 3.4%       | 0.0%       | 0.0%           | 0.0%           | 0.0%           | 0.0%           | 0.0% |
| tr F1SEK6 F1SEK6         | 1                | 0          | 0          | 0              | 0              | 0              | 0              | 0              | 1          | 0          | 0              | 0              | 0              | 0              | 0                 | 8.9%       | 0.0%       | 0.0%           | 0.0%           | 0.0%           | 0.0%           | 0.0% |
| Reverse_tr F1RXT5 F1RXT5 | 0                | 1          | 0          | 0              | 0              | 0              | 0              | 0              | 0          | 1          | 0              | 0              | 0              | 0              | 0                 | 0.0%       | 0.8%       | 0.0%           | 0.0%           | 0.0%           | 0.0%           | 0.0% |
| tr F1RG90 F1RG90         | 0                | 1          | 0          | 0              | 0              | 0              | 0              | 0              | 0          | 1          | 0              | 0              | 0              | 0              | 0                 | 0.0%       | 0.8%       | 0.0%           | 0.0%           | 0.0%           | 0.0%           | 0.0% |
| tr F1S3J1 F1S3J1         | 1                | 0          | 0          | 0              | 0              | 0              | 0              | 0              | 1          | 0          | 0              | 0              | 0              | 0              | 0                 | 10.5%      | 0.0%       | 0.0%           | 0.0%           | 0.0%           | 0.0%           | 0.0% |
| tr F1SL73 F1SL73         | 0                | 1          | 0          | 0              | 0              | 0              | 0              | 0              | 0          | 1          | 0              | 0              | 0              | 0              | 0                 | 0.0%       | 5.9%       | 0.0%           | 0.0%           | 0.0%           | 0.0%           | 0.0% |
| tr I3LSY8 I3LSY8         | 0                | 1          | 0          | 0              | 0              | 0              | 0              | 0              | 0          | 1          | 0              | 0              | 0              | 0              | 0                 | 0.0%       | 6.2%       | 0.0%           | 0.0%           | 0.0%           | 0.0%           | 0.0% |
| tr K7GLS0 K7GLS0         | 1                | 0          | 0          | 0              | 0              | 0              | 0              | 0              | 1          | 0          | 0              | 0              | 0              | 0              | 0                 | 1.8%       | 0.0%       | 0.0%           | 0.0%           | 0.0%           | 0.0%           | 0.0% |
| tr F1RG63 F1RG63         | tr F1RG63 F1RG63 | 1          | 0          | 0              | 0              | 0              | 0              | 0              | 1          | 0          | 0              | 0              | 0              | 0              | 0                 | 6.2%       | 0.0%       | 0.0%           | 0.0%           | 0.0%           | 0.0%           | 0.0% |
| tr A5GFW0 A5GFW0         | 0                | 1          | 0          | 0              | 0              | 0              | 0              | 0              | 0          | 1          | 0              | 0              | 0              | 0              | 0                 | 0.0%       | 6.8%       | 0.0%           | 0.0%           | 0.0%           | 0.0%           | 0.0% |
| tr F1S5W6 F1S5W6         | 0                | 1          | 0          | 0              | 0              | 0              | 0              | 0              | 0          | 1          | 0              | 0              | 0              | 0              | 0                 | 0.0%       | 8.4%       | 0.0%           | 0.0%           | 0.0%           | 0.0%           | 0.0% |
| tr F1SRD7 F1SRD7         | 1                | 0          | 0          | 0              | 0              | 0              | 0              | 0              | 1          | 0          | 0              | 0              | 0              | 0              | 0                 | 17.6%      | 0.0%       | 0.0%           | 0.0%           | 0.0%           | 0.0%           | 0.0% |
| tr F1RFN3 F1RFN3         | 1                | 0          | 0          | 0              | 0              | 0              | 0              | 0              | 1          | 0          | 0              | 0              | 0              | 0              | 0                 | 1.2%       | 0.0%       | 0.0%           | 0.0%           | 0.0%           | 0.0%           | 0.0% |
| tr I3LIY2 I3LIY2         | 0                | 1          | 0          | 0              | 0              | 0              | 0              | 0              | 0          | 1          | 0              | 0              | 0              | 0              | 0                 | 0.0%       | 6.7%       | 0.0%           | 0.0%           | 0.0%           | 0.0%           | 0.0% |
| tr I3LAK8 I3LAK8         | 1                | 0          | 0          | 0              | 0              | 0              | 0              | 0              | 1          | 0          | 0              | 0              | 0              | 0              | 0                 | 20.0%      | 0.0%       | 0.0%           | 0.0%           | 0.0%           | 0.0%           | 0.0% |
| tr F1RIG0 F1RIG0         | 1                | 0          | 0          | 0              | 0              | 0              | 0              | 0              | 1          | 0          | 0              | 0              | 0              | 0              | 0                 | 7.4%       | 0.0%       | 0.0%           | 0.0%           | 0.0%           | 0.0%           | 0.0% |
| Reverse_tr F1SR80 F1SR80 | 0                | 1          | 0          | 0              | 0              | 0              | 0              | 0              | 0          | 1          | 0              | 0              | 0              | 0              | 0                 | 0.0%       | 2.9%       | 0.0%           | 0.0%           | 0.0%           | 0.0%           | 0.0% |
| tr I3LR25 I3LR25         | 0                | 1          | 0          | 0              | 0              | 0              | 0              | 0              | 0          | 1          | 0              | 0              | 0              | 0              | 0                 | 0.0%       | 3.1%       | 0.0%           | 0.0%           | 0.0%           | 0.0%           | 0.0% |
| tr I3LN06 I3LN06         | 1                | 0          | 0          | 0              | 0              | 0              | 0              | 0              | 1          | 0          | 0              | 0              | 0              | 0              | 0                 | 1.3%       | 0.0%       | 0.0%           | 0.0%           | 0.0%           | 0.0%           | 0.0% |
| tr I3LH84 I3LH84         | 0                | 1          | 0          | 0              | 0              | 0              | 0              | 0              | 0          | 1          | 0              | 0              | 0              | 0              | 0                 | 0.0%       | 4.4%       | 0.0%           | 0.0%           | 0.0%           | 0.0%           | 0.0% |
| tr I3LFM6 I3LFM6         | 1                | 0          | 0          | 0              | 0              | 0              | 0              | 0              | 1          | 0          | 0              | 0              | 0              | 0              | 0                 | 4.6%       | 0.0%       | 0.0%           | 0.0%           | 0.0%           | 0.0%           | 0.0% |
| tr I3LF21 I3LF21         | 1                | 0          | 0          | 0              | 0              | 0              | 0              | 0              | 1          | 0          | 0              | 0              | 0              | 0              | 0                 | 7.1%       | 0.0%       | 0.0%           | 0.0%           | 0.0%           | 0.0%           | 0.0% |
| tr I3L8X9 I3L8X9         | 0                | 1          | 0          | 0              | 0              | 0              | 0              | 0              | 0          | 1          | 0              | 0              | 0              | 0              | 0                 | 0.0%       | 17.5%      | 0.0%           | 0.0%           | 0.0%           | 0.0%           | 0.0% |
| tr F1RW48 F1RW48         | 1                | 0          | 0          | 0              | 0              | 0              | 0              | 0              | 1          | 0          | 0              | 0              | 0              | 0              | 0                 | 5.6%       | 0.0%       | 0.0%           | 0.0%           | 0.0%           | 0.0%           | 0.0% |
| tr K7GLT6 K7GLT6         | 1                | 0          | 0          | 0              | 0              | 0              | 0              | 0              | 1          | 0          | 0              | 0              | 0              | 0              | 0                 | 4.2%       | 0.0%       | 0.0%           | 0.0%           | 0.0%           | 0.0%           | 0.0% |
| tr I3LT19 I3LT19         | 1                | 0          | 0          | 0              | 0              | 0              | 0              | 0              | 1          | 0          | 0              | 0              | 0              | 0              | 0                 | 6.9%       | 0.0%       | 0.0%           | 0.0%           | 0.0%           | 0.0%           | 0.0% |
| tr I3L655 I3L655         | 1                | 0          | 0          | 0              | 0              | 0              | 0              | 0              | 1          | 0          | 0              | 0              | 0              | 0              | 0                 | 2.0%       | 0.0%       | 0.0%           | 0.0%           | 0.0%           | 0.0%           | 0.0% |
| tr K7N7E4 K7N7E4         | 0                | 1          | 0          | 0              | 0              | 0              | 0              | 0              | 0          | 1          | 0              | 0              | 0              | 0              | 0                 | 0.0%       | 9.8%       | 0.0%           | 0.0%           | 0.0%           | 0.0%           | 0.0% |
| tr I3L8Q5 I3L8Q5         | 1                | 0          | 0          | 0              | 0              | 0              | 0              | 0              | 1          | 0          | 0              | 0              | 0              | 0              | 0                 | 8.0%       | 0.0%       | 0.0%           | 0.0%           | 0.0%           | 0.0%           | 0.0% |
| tr F1SF72 F1SF72         | 1                | 0          | 0          | 0              | 0              | 0              | 0              | 0              | 1          | 0          | 0              | 0              | 0              | 0              | 0                 | 3.6%       | 0.0%       | 0.0%           | 0.0%           | 0.0%           | 0.0%           | 0.0% |
| tr F1SNE8 F1SNE8         | 1                | 0          | 0          | 0              | 0              | 0              | 0              | 0              | 1          | 0          | 0              | 0              | 0              | 0              | 0                 | 3.2%       | 0.0%       | 0.0%           | 0.0%           | 0.0%           | 0.0%           | 0.0% |
| tr I3L717 I3L717         | 1                | 0          | 0          | 0              | 0              | 0              | 0              | 0              | 1          | 0          | 0              | 0              | 0              | 0              | 0                 | 9.4%       | 0.0%       | 0.0%           | 0.0%           | 0.0%           | 0.0%           | 0.0% |
| tr I3LBC4 I3LBC4         | 1                | 0          | 0          | 0              | 0              | 0              | 0              | 0              | 1          | 0          | 0              | 0              | 0              | 0              | 0                 | 7.4%       | 0.0%       | 0.0%           | 0.0%           | 0.0%           | 0.0%           | 0.0% |
| tr F1SRD1 F1SRD1         | 1                | 0          | 0          | 0              | 0              | 0              | 0              | 0              | 1          | 0          | 0              | 0              | 0              | 0              | 0                 | 9.1%       | 0.0%       | 0.0%           | 0.0%           | 0.0%           | 0.0%           | 0.0% |
| tr F1RV56 F1RV56         | 1                | 0          | 0          | 0              | 0              | 0              | 0              | 0              | 1          | 0          | 0              | 0              | 0              | 0              | 0                 | 13.2%      | 0.0%       | 0.0%           | 0.0%           | 0.0%           | 0.0%           | 0.0% |
| tr I3LPC8 I3LPC8         | 1                | 0          | 0          | 0              | 0              | 0              | 0              | 0              | 1          | 0          | 0              | 0              | 0              | 0              | 0                 | 27.1%      | 0.0%       | 0.0%           | 0.0%           | 0.0%           | 0.0%           | 0.0% |
| tr F1S576 F1S576         | 1                | 0          | 0          | 0              | 0              | 0              | 0              | 0              | 1          | 0          | 0              | 0              | 0              | 0              | 0                 | 2.0%       | 0.0%       | 0.0%           | 0.0%           | 0.0%           | 0.0%           | 0.0% |
| Reverse_tr F1S1S9 F1S1S9 | 1                | 0          | 0          | 0              | 0              | 0              | 0              | 0              | 1          | 0          | 0              | 0              | 0              | 0              | 0                 | 1.1%       | 0.0%       | 0.0%           | 0.0%           | 0.0%           | 0.0%           | 0.0% |
| tr I3LNF0 I3LNF0         | 0                | 1          | 0          | 0              | 0              | 0              | 0              | 0              | 0          | 1          | 0              | 0              | 0              | 0              | 0                 | 0.0%       | 0.4%       | 0.0%           | 0.0%           | 0.0%           | 0.0%           | 0.0% |
| tr I3LB63 I3LB63         | 1                | 0          | 0          | 0              | 0              | 0              | 0              | 0              | 1          | 0          | 0              | 0              | 0              | 0              | 0                 | 5.2%       | 0.0%       | 0.0%           | 0.0%           | 0.0%           | 0.0%           | 0.0% |
| tr I3LIC5 I3LIC5         | 0                | 1          | 0          | 0              | 0              | 0              | 0              | 0              | 0          | 1          | 0              | 0              | 0              | 0              | 0                 | 0.0%       | 1.5%       | 0.0%           | 0.0%           | 0.0%           | 0.0%           | 0.0% |
| tr F1SG23 F1SG23         | 0                | 1          | 0          | 0              | 0              | 0              | 0              | 0              | 0          | 1          | 0              | 0              | 0              | 0              | 0                 | 0.0%       | 5.2%       | 0.0%           | 0.0%           | 0.0%           | 0.0%           | 0.0% |
| tr I3L866 I3L866         | 1                | 0          | 0          | 0              | 0              | 0              | 0              | 0              | 1          | 0          | 0              | 0              | 0              | 0              | 0                 | 2.2%       | 0.0%       | 0.0%           | 0.0%           | 0.0%           | 0.0%           | 0.0% |
| Reverse_tr F1RKA9 F1RKA9 | 1                | 0          | 0          | 0              | 0              | 0              | 0              | 0              | 1          | 0          | 0              | 0              | 0              | 0              | 0                 | 3.1%       | 0.0%       | 0.0%           | 0.0%           | 0.0%           | 0.0%           | 0.0% |
| tr F1RYI5 F1RYI5         | tr F1RYI5 F1RYI5 | 1          | 0          | 0              | 0              | 0              | 0              | 0              | 1          | 0          | 0              | 0              | 0              | 0              | 0                 | 2.5%       | 0.0%       | 0.0%           | 0.0%           | 0.0%           | 0.0%           | 0.0% |
| tr F1RFK3 F1RFK3         | 1                | 0          | 0          | 0              | 0              | 0              | 0              | 0              | 1          | 0          | 0              | 0              | 0              | 0              | 0                 | 0.9%       | 0.0%       | 0.0%           | 0.0%           | 0.0%           | 0.0%           | 0.0% |
| tr F1SRK9 F1SRK9         | 0                | 1          | 0          | 0              | 0              | 0              | 0              | 0              | 0          | 1          | 0              | 0              | 0              | 0              | 0                 | 0.0%       | 3.7%       | 0.0%           | 0.0%           | 0.0%           | 0.0%           | 0.0% |
| tr I3LSU5 I3LSU5         | 1                | 0          | 0          | 0              | 0              | 0              | 0              | 0              | 1          | 0          | 0              | 0              | 0              | 0              | 0                 | 5.1%       | 0.0%       | 0.0%           | 0.0%           | 0.0%           | 0.0%           | 0.0% |
| tr I3LA45 I3LA45         | 1                | 0          | 0          | 0              | 0              | 0              | 0              | 0              | 1          | 0          | 0              | 0              | 0              | 0              | 0                 | 6.7%       | 0.0%       | 0.0%           | 0.0%           | 0.0%           | 0.0%           | 0.0% |
| tr F1S0U6 F1S0U6         | 0                | 1          | 0          | 0              | 0              | 0              | 0              | 0              | 0          | 1          | 0              | 0              | 0              | 0              | 0                 | 0.0%       | 0.4%       | 0.0%           | 0.0%           | 0.0%           | 0.0%           | 0.0% |
| tr F1SMI6 F1SMI6         | 1                | 0          | 0          | 0              | 0              | 0              | 0              | 0              | 1          | 0          | 0              | 0              | 0              | 0              | 0                 | 18.2%      | 0.0%       | 0.0%           | 0.0%           | 0.0%           | 0.0%           | 0.0% |
| tr F1RQH7 F1RQH7         | 1                | 0          | 0          | 0              | 0              | 0              | 0              | 0              | 1          | 0          | 0              | 0              | 0              | 0              | 0                 | 2.9%       | 0.0%       | 0.0%           | 0.0%           | 0.0%           | 0.0%           | 0.0% |
| tr F1SUL0 F1SUL0         | 1                | 0          | 0          | 0              | 0              | 0              | 0              | 0              | 1          | 0          | 0              | 0              | 0              | 0              | 0                 | 3.6%       | 0.0%       | 0.0%           | 0.0%           | 0.0%           | 0.0%           | 0.0% |
| tr F1RV32 F1RV32         | 1                | 0          | 0          | 0              | 0              | 0              | 0              | 0              | 1          | 0          | 0              | 0              | 0              | 0              | 0                 | 1.4%       | 0.0%       | 0.0%           | 0.0%           | 0.0%           | 0.0%           | 0.0% |
| tr I3LHW7 I3LHW7         | 1                | 0          | 0          | 0              | 0              | 0              | 0              | 0              | 1          | 0          | 0              | 0              | 0              | 0              | 0                 | 19.4%      | 0.0%       | 0.0%           | 0.0%           | 0.0%           | 0.0%           | 0.0% |
| tr I3LU                  |                  |            |            |                |                |                |                |                |            |            |                |                |                |                |                   |            |            |                |                |                |                |      |

| Accession                | Sample# | Peptide Count |            |            |                |                |                |                | Spectral Count |            |            |                |                |                |                | Sequence Coverage |            |            |                |                |                |                |      |
|--------------------------|---------|---------------|------------|------------|----------------|----------------|----------------|----------------|----------------|------------|------------|----------------|----------------|----------------|----------------|-------------------|------------|------------|----------------|----------------|----------------|----------------|------|
|                          |         | Whole Cell    | Whole Cell | Whole Cell | Cilia Fraction | Cilia Fraction | Cilia Fraction | Cilia Fraction | Whole Cell     | Whole Cell | Whole Cell | Cilia Fraction | Cilia Fraction | Cilia Fraction | Cilia Fraction | Whole Cell        | Whole Cell | Whole Cell | Cilia Fraction | Cilia Fraction | Cilia Fraction | Cilia Fraction |      |
|                          |         | 1             | 2          | 6          | 4              | 3              | 5              | 7              | 1              | 2          | 6          | 4              | 3              | 5              | 7              | 1                 | 2          | 6          | 4              | 3              | 5              | 7              | 8    |
| tr F1RY40 F1RY40         |         | 1             | 0          | 0          | 0              | 0              | 0              | 0              | 1              | 0          | 0          | 0              | 0              | 0              | 0              | 1.4%              | 0.0%       | 0.0%       | 0.0%           | 0.0%           | 0.0%           | 0.0%           | 0.0% |
| tr F1SDS2 F1SDS2         |         | 0             | 1          | 0          | 0              | 0              | 0              | 0              | 0              | 1          | 0          | 0              | 0              | 0              | 0              | 0.0%              | 3.5%       | 0.0%       | 0.0%           | 0.0%           | 0.0%           | 0.0%           | 0.0% |
| tr F1ST27 F1ST27         |         | 1             | 0          | 0          | 0              | 0              | 0              | 0              | 1              | 0          | 0          | 0              | 0              | 0              | 0              | 13.4%             | 0.0%       | 0.0%       | 0.0%           | 0.0%           | 0.0%           | 0.0%           | 0.0% |
| tr F1RYQ6 F1RYQ6         |         | 0             | 1          | 0          | 0              | 0              | 0              | 0              | 0              | 1          | 0          | 0              | 0              | 0              | 0              | 0.0%              | 1.3%       | 0.0%       | 0.0%           | 0.0%           | 0.0%           | 0.0%           | 0.0% |
| tr I3LCR2 I3LCR2         |         | 0             | 1          | 0          | 0              | 0              | 0              | 0              | 0              | 1          | 0          | 0              | 0              | 0              | 0              | 0.0%              | 42.6%      | 0.0%       | 0.0%           | 0.0%           | 0.0%           | 0.0%           | 0.0% |
| tr F1RVT1 F1RVT1         |         | 1             | 0          | 0          | 0              | 0              | 0              | 0              | 1              | 0          | 0          | 0              | 0              | 0              | 0              | 1.5%              | 0.0%       | 0.0%       | 0.0%           | 0.0%           | 0.0%           | 0.0%           | 0.0% |
| tr F1RRT2 F1RRT2         |         | 1             | 0          | 0          | 0              | 0              | 0              | 0              | 1              | 0          | 0          | 0              | 0              | 0              | 0              | 7.9%              | 0.0%       | 0.0%       | 0.0%           | 0.0%           | 0.0%           | 0.0%           | 0.0% |
| tr I3L7G7 I3L7G7         |         | 1             | 0          | 0          | 0              | 0              | 0              | 0              | 1              | 0          | 0          | 0              | 0              | 0              | 0              | 6.5%              | 0.0%       | 0.0%       | 0.0%           | 0.0%           | 0.0%           | 0.0%           | 0.0% |
| tr F1S150 F1S150         |         | 1             | 0          | 0          | 0              | 0              | 0              | 0              | 1              | 0          | 0          | 0              | 0              | 0              | 0              | 2.2%              | 0.0%       | 0.0%       | 0.0%           | 0.0%           | 0.0%           | 0.0%           | 0.0% |
| tr F1SNB1 F1SNB1         |         | 1             | 0          | 0          | 0              | 0              | 0              | 0              | 1              | 0          | 0          | 0              | 0              | 0              | 0              | 4.6%              | 0.0%       | 0.0%       | 0.0%           | 0.0%           | 0.0%           | 0.0%           | 0.0% |
| Q28944                   |         | 0             | 1          | 0          | 0              | 0              | 0              | 0              | 0              | 1          | 0          | 0              | 0              | 0              | 0              | 0.0%              | 6.9%       | 0.0%       | 0.0%           | 0.0%           | 0.0%           | 0.0%           | 0.0% |
| Q28948                   |         | 1             | 0          | 0          | 0              | 0              | 0              | 0              | 1              | 0          | 0          | 0              | 0              | 0              | 0              | 3.1%              | 0.0%       | 0.0%       | 0.0%           | 0.0%           | 0.0%           | 0.0%           | 0.0% |
| Q28955                   |         | 1             | 0          | 0          | 0              | 0              | 0              | 0              | 1              | 0          | 0          | 0              | 0              | 0              | 0              | 6.8%              | 0.0%       | 0.0%       | 0.0%           | 0.0%           | 0.0%           | 0.0%           | 0.0% |
| Q28970                   |         | 0             | 1          | 0          | 0              | 0              | 0              | 0              | 0              | 1          | 0          | 0              | 0              | 0              | 0              | 0.0%              | 2.5%       | 0.0%       | 0.0%           | 0.0%           | 0.0%           | 0.0%           | 0.0% |
| tr I3LEF7 I3LEF7         |         | 1             | 0          | 0          | 0              | 0              | 0              | 0              | 1              | 0          | 0          | 0              | 0              | 0              | 0              | 3.9%              | 0.0%       | 0.0%       | 0.0%           | 0.0%           | 0.0%           | 0.0%           | 0.0% |
| tr I3LLZ7 I3LLZ7         |         | 0             | 1          | 0          | 0              | 0              | 0              | 0              | 0              | 1          | 0          | 0              | 0              | 0              | 0              | 0.0%              | 6.5%       | 0.0%       | 0.0%           | 0.0%           | 0.0%           | 0.0%           | 0.0% |
| tr I3L7K3 I3L7K3         |         | 1             | 0          | 0          | 0              | 0              | 0              | 0              | 1              | 0          | 0          | 0              | 0              | 0              | 0              | 3.6%              | 0.0%       | 0.0%       | 0.0%           | 0.0%           | 0.0%           | 0.0%           | 0.0% |
| tr I3LE56 I3LE56         |         | 0             | 1          | 0          | 0              | 0              | 0              | 0              | 0              | 1          | 0          | 0              | 0              | 0              | 0              | 0.0%              | 2.2%       | 0.0%       | 0.0%           | 0.0%           | 0.0%           | 0.0%           | 0.0% |
| tr F1SGA9 F1SGA9         |         | 1             | 0          | 0          | 0              | 0              | 0              | 0              | 1              | 0          | 0          | 0              | 0              | 0              | 0              | 12.1%             | 0.0%       | 0.0%       | 0.0%           | 0.0%           | 0.0%           | 0.0%           | 0.0% |
| tr F1SQL8 F1SQL8         |         | 1             | 0          | 0          | 0              | 0              | 0              | 0              | 1              | 0          | 0          | 0              | 0              | 0              | 0              | 5.3%              | 0.0%       | 0.0%       | 0.0%           | 0.0%           | 0.0%           | 0.0%           | 0.0% |
| tr I3LDA1 I3LDA1         |         | 1             | 0          | 0          | 0              | 0              | 0              | 0              | 1              | 0          | 0          | 0              | 0              | 0              | 0              | 1.2%              | 0.0%       | 0.0%       | 0.0%           | 0.0%           | 0.0%           | 0.0%           | 0.0% |
| tr F1RGM7 F1RGM7         |         | 1             | 0          | 0          | 0              | 0              | 0              | 0              | 1              | 0          | 0          | 0              | 0              | 0              | 0              | 7.3%              | 0.0%       | 0.0%       | 0.0%           | 0.0%           | 0.0%           | 0.0%           | 0.0% |
| tr F1RMF6 F1RMF6         |         | 1             | 0          | 0          | 0              | 0              | 0              | 0              | 1              | 0          | 0          | 0              | 0              | 0              | 0              | 5.1%              | 0.0%       | 0.0%       | 0.0%           | 0.0%           | 0.0%           | 0.0%           | 0.0% |
| tr I3LLE0 I3LLE0         |         | 1             | 0          | 0          | 0              | 0              | 0              | 0              | 1              | 0          | 0          | 0              | 0              | 0              | 0              | 4.5%              | 0.0%       | 0.0%       | 0.0%           | 0.0%           | 0.0%           | 0.0%           | 0.0% |
| tr I3L8T3 I3L8T3         |         | 0             | 1          | 0          | 0              | 0              | 0              | 0              | 0              | 1          | 0          | 0              | 0              | 0              | 0              | 0.0%              | 1.8%       | 0.0%       | 0.0%           | 0.0%           | 0.0%           | 0.0%           | 0.0% |
| tr F1SDQ3 F1SDQ3         |         | 1             | 0          | 0          | 0              | 0              | 0              | 0              | 1              | 0          | 0          | 0              | 0              | 0              | 0              | 3.8%              | 0.0%       | 0.0%       | 0.0%           | 0.0%           | 0.0%           | 0.0%           | 0.0% |
| tr F1SRR2 F1SRR2         |         | 1             | 0          | 0          | 0              | 0              | 0              | 0              | 1              | 0          | 0          | 0              | 0              | 0              | 0              | 17.9%             | 0.0%       | 0.0%       | 0.0%           | 0.0%           | 0.0%           | 0.0%           | 0.0% |
| tr I3L6I5 I3L6I5         |         | 1             | 0          | 0          | 0              | 0              | 0              | 0              | 1              | 0          | 0          | 0              | 0              | 0              | 0              | 5.6%              | 0.0%       | 0.0%       | 0.0%           | 0.0%           | 0.0%           | 0.0%           | 0.0% |
| tr F1RL37 F1RL37         |         | 0             | 1          | 0          | 0              | 0              | 0              | 0              | 0              | 1          | 0          | 0              | 0              | 0              | 0              | 0.0%              | 13.8%      | 0.0%       | 0.0%           | 0.0%           | 0.0%           | 0.0%           | 0.0% |
| tr F1RKR7 F1RKR7         |         | 0             | 1          | 0          | 0              | 0              | 0              | 0              | 0              | 1          | 0          | 0              | 0              | 0              | 0              | 0.0%              | 4.6%       | 0.0%       | 0.0%           | 0.0%           | 0.0%           | 0.0%           | 0.0% |
| tr F1SQK6 F1SQK6         |         | 1             | 0          | 0          | 0              | 0              | 0              | 0              | 1              | 0          | 0          | 0              | 0              | 0              | 0              | 1.7%              | 0.0%       | 0.0%       | 0.0%           | 0.0%           | 0.0%           | 0.0%           | 0.0% |
| tr I3L694 I3L694         |         | 0             | 1          | 0          | 0              | 0              | 0              | 0              | 0              | 1          | 0          | 0              | 0              | 0              | 0              | 0.0%              | 4.9%       | 0.0%       | 0.0%           | 0.0%           | 0.0%           | 0.0%           | 0.0% |
| tr F1RRV9 F1RRV9         |         | 1             | 0          | 0          | 0              | 0              | 0              | 0              | 1              | 0          | 0          | 0              | 0              | 0              | 0              | 2.0%              | 0.0%       | 0.0%       | 0.0%           | 0.0%           | 0.0%           | 0.0%           | 0.0% |
| tr F1RQH3 F1RQH3         |         | 1             | 0          | 0          | 0              | 0              | 0              | 0              | 1              | 0          | 0          | 0              | 0              | 0              | 0              | 1.2%              | 0.0%       | 0.0%       | 0.0%           | 0.0%           | 0.0%           | 0.0%           | 0.0% |
| tr A0ZVR0 A0ZVR0         |         | 1             | 0          | 0          | 0              | 0              | 0              | 0              | 1              | 0          | 0          | 0              | 0              | 0              | 0              | 5.7%              | 0.0%       | 0.0%       | 0.0%           | 0.0%           | 0.0%           | 0.0%           | 0.0% |
| tr F1SSS8 F1SSS8         |         | 1             | 0          | 0          | 0              | 0              | 0              | 0              | 1              | 0          | 0          | 0              | 0              | 0              | 0              | 2.7%              | 0.0%       | 0.0%       | 0.0%           | 0.0%           | 0.0%           | 0.0%           | 0.0% |
| tr F1S6Z9 F1S6Z9         |         | 1             | 0          | 0          | 0              | 0              | 0              | 0              | 1              | 0          | 0          | 0              | 0              | 0              | 0              | 2.4%              | 0.0%       | 0.0%       | 0.0%           | 0.0%           | 0.0%           | 0.0%           | 0.0% |
| tr F1RVi6 F1RVi6         |         | 0             | 1          | 0          | 0              | 0              | 0              | 0              | 0              | 1          | 0          | 0              | 0              | 0              | 0              | 0.0%              | 2.7%       | 0.0%       | 0.0%           | 0.0%           | 0.0%           | 0.0%           | 0.0% |
| tr F1RQ27 F1RQ27         |         | 1             | 0          | 0          | 0              | 0              | 0              | 0              | 1              | 0          | 0          | 0              | 0              | 0              | 0              | 2.8%              | 0.0%       | 0.0%       | 0.0%           | 0.0%           | 0.0%           | 0.0%           | 0.0% |
| tr K7GQ81 K7GQ81         |         | 0             | 1          | 0          | 0              | 0              | 0              | 0              | 0              | 1          | 0          | 0              | 0              | 0              | 0              | 0.0%              | 4.6%       | 0.0%       | 0.0%           | 0.0%           | 0.0%           | 0.0%           | 0.0% |
| Reverse_tr I3L5N6 I3L5N6 |         | 1             | 0          | 0          | 0              | 0              | 0              | 0              | 1              | 0          | 0          | 0              | 0              | 0              | 0              | 16.5%             | 0.0%       | 0.0%       | 0.0%           | 0.0%           | 0.0%           | 0.0%           | 0.0% |
| tr F1RFU0 F1RFU0         |         | 0             | 1          | 0          | 0              | 0              | 0              | 0              | 0              | 1          | 0          | 0              | 0              | 0              | 0              | 0.0%              | 2.7%       | 0.0%       | 0.0%           | 0.0%           | 0.0%           | 0.0%           | 0.0% |
| tr F1SLH6 F1SLH6         |         | 0             | 1          | 0          | 0              | 0              | 0              | 0              | 0              | 1          | 0          | 0              | 0              | 0              | 0              | 0.0%              | 2.7%       | 0.0%       | 0.0%           | 0.0%           | 0.0%           | 0.0%           | 0.0% |
| tr F1RG33 F1RG33         |         | 1             | 0          | 0          | 0              | 0              | 0              | 0              | 1              | 0          | 0          | 0              | 0              | 0              | 0              | 2.0%              | 0.0%       | 0.0%       | 0.0%           | 0.0%           | 0.0%           | 0.0%           | 0.0% |
| tr F1RIC1 F1RIC1         |         | 1             | 0          | 0          | 0              | 0              | 0              | 0              | 1              | 0          | 0          | 0              | 0              | 0              | 0              | 3.0%              | 0.0%       | 0.0%       | 0.0%           | 0.0%           | 0.0%           | 0.0%           | 0.0% |
| tr F1SGN7 F1SGN7         |         | 1             | 0          | 0          | 0              | 0              | 0              | 0              | 1              | 0          | 0          | 0              | 0              | 0              | 0              | 11.0%             | 0.0%       | 0.0%       | 0.0%           | 0.0%           | 0.0%           | 0.0%           | 0.0% |
| tr I3LSR0 I3LSR0         |         | 1             | 0          | 0          | 0              | 0              | 0              | 0              | 1              | 0          | 0          | 0              | 0              | 0              | 0              | 14.3%             | 0.0%       | 0.0%       | 0.0%           | 0.0%           | 0.0%           | 0.0%           | 0.0% |
| tr F1SUS4 F1SUS4         |         | 1             | 0          | 0          | 0              | 0              | 0              | 0              | 1              | 0          | 0          | 0              | 0              | 0              | 0              | 13.5%             | 0.0%       | 0.0%       | 0.0%           | 0.0%           | 0.0%           | 0.0%           | 0.0% |
| tr I3LSR8 I3LSR8         |         | 1             | 0          | 0          | 0              | 0              | 0              | 0              | 1              | 0          | 0          | 0              | 0              | 0              | 0              | 2.2%              | 0.0%       | 0.0%       | 0.0%           | 0.0%           | 0.0%           | 0.0%           | 0.0% |
| tr F1RQU4 F1RQU4         |         | 1             | 0          | 0          | 0              | 0              | 0              | 0              | 1              | 0          | 0          | 0              | 0              | 0              | 0              | 3.1%              | 0.0%       | 0.0%       | 0.0%           | 0.0%           | 0.0%           | 0.0%           | 0.0% |
| tr I3LGC9 I3LGC9         |         | 1             | 0          | 0          | 0              | 0              | 0              | 0              | 1              | 0          | 0          | 0              | 0              | 0              | 0              | 9.7%              | 0.0%       | 0.0%       | 0.0%           | 0.0%           | 0.0%           | 0.0%           | 0.0% |
| tr F1S3L2 F1S3L2         |         | 1             | 0          | 0          | 0              | 0              | 0              | 0              | 1              | 0          | 0          | 0              | 0              | 0              | 0              | 1.4%              | 0.0%       | 0.0%       | 0.0%           | 0.0%           | 0.0%           | 0.0%           | 0.0% |
| tr F1SHV6 F1SHV6         |         | 0             | 1          | 0          | 0              | 0              | 0              | 0              | 0              | 1          | 0          | 0              | 0              | 0              | 0              | 0.0%              | 2.9%       | 0.0%       | 0.0%           | 0.0%           | 0.0%           | 0.0%           | 0.0% |
| tr F1S176 F1S176         |         | 0             | 1          | 0          | 0              | 0              | 0              | 0              | 0              | 1          | 0          | 0              | 0              | 0              | 0              | 0.0%              | 1.2%       | 0.0%       | 0.0%           | 0.0%           | 0.0%           | 0.0%           | 0.0% |
| tr I3LGI1 I3LGI1         |         | 0             | 1          | 0          | 0              | 0              | 0              | 0              | 0              | 1          | 0          | 0              | 0              | 0              | 0              | 0.0%              | 7.6%       | 0.0%       | 0.0%           | 0.0%           | 0.0%           | 0.0%           | 0.0% |
| tr F1RGT2 F1RGT2         |         | 1             | 0          | 0          | 0              | 0              | 0              | 0              | 1              | 0          | 0          | 0              | 0              | 0              | 0              | 6.8%              | 0.0%       | 0.0%       | 0.0%           | 0.0%           | 0.0%           | 0.0%           | 0.0% |
| tr I3LS78 I3LS78         |         | 1             | 0          | 0          | 0              | 0              | 0              | 0              | 1              | 0          | 0          | 0              | 0              | 0              | 0              | 5.8%              | 0.0%       | 0.0%       | 0.0%           | 0.0%           | 0.0%           | 0.0%           | 0.0% |
| tr F1S1S9 F1S1S9         |         | 0             | 1          | 0          | 0              | 0              | 0              | 0              | 0              | 1          | 0          | 0              | 0              | 0              | 0              | 0.0%              | 10.2%      | 0.0%       | 0.0%           | 0.0%           | 0.0%           | 0.0%           | 0.0% |
| tr F2Z5H7 F2Z5H7         |         | 1             | 0          | 0          | 0              | 0              | 0              | 0              | 1              | 0          | 0          | 0              | 0              | 0              | 0              | 3.5%              | 0.0%       | 0.0%       | 0.0%           | 0.0%           | 0.0%           | 0.0%           | 0.0% |
| tr F1S2B1 F1S2B1         |         | 0             | 1          | 0          | 0              | 0              | 0              | 0              | 0              | 1          | 0          | 0              | 0              | 0              | 0              | 0.0%              | 4.8%       | 0.0%       | 0.0%           | 0.0%           | 0.0%           | 0.0%           | 0.0% |
| tr F1SIH4 F1SIH4         |         | 1             | 0          | 0          | 0              | 0              | 0              | 0              | 1              | 0          | 0          | 0              | 0              | 0              | 0              | 0.9%              | 0.0%       | 0.0%       | 0.0%           | 0.0%           | 0.0%           | 0.0%           | 0.0% |
| tr F6PWG7 F6PWG7         |         | 1             | 0          | 0          | 0              | 0              | 0              | 0              | 1              | 0          | 0          | 0              | 0              | 0              | 0              | 9.3%              | 0.0%       | 0.0%       | 0.0%           | 0.0%           | 0.0%           | 0.0%           | 0.0% |
| Reverse_tr F1SGX3 F1SGX3 |         | 1             | 0          | 0          | 0              | 0              | 0              | 0              | 1              | 0          | 0          | 0              | 0              | 0              | 0              | 0.8%              | 0.0%       | 0.0%       | 0.0%           | 0.0%           | 0.0%           | 0.0%           | 0.0% |
| tr F1RL14 F1RL14         |         | 1             | 0          | 0          | 0              | 0              | 0              | 0              | 1              | 0          | 0          | 0              | 0              | 0              | 0              | 5.5%              | 0.0%       | 0.0%       | 0.0%           | 0.0%           | 0.0%           | 0.0%           | 0.0% |
| tr I3LJK1 I3LJK1         |         | 0             | 1          | 0          | 0              | 0              | 0              | 0              | 0              | 1          | 0          | 0              | 0              | 0              | 0              | 0.0%              | 2.2%       | 0.0%       | 0.0%           | 0.0%           | 0.0%           | 0.0%           | 0.0% |
| tr I3L673 I3L673         |         | 0             | 1          | 0          | 0              | 0              | 0              | 0              | 0              | 1          | 0          | 0              | 0              | 0              | 0              | 0.0%              | 6.2%       | 0.0%       | 0.0%           | 0.0%           | 0.0%           | 0.0%           | 0.0% |
| tr F1S680 F1S680         |         | 0             | 1          | 0          | 0              | 0              | 0              | 0              | 0              | 1          | 0          | 0              | 0              | 0              | 0              | 0.0%              | 1.1%       | 0.0%       | 0.0%           | 0.0%           | 0.0%           | 0.0%           | 0.0% |
| tr I3LCS9 I3LCS9         |         | 1             | 0          | 0          | 0              | 0              | 0              |                |                |            |            |                |                |                |                |                   |            |            |                |                |                |                |      |

| Sample#                  | Peptide Count |            |            |                |                |                |                |   | Spectral Count |            |            |                |                |                |                |   | Sequence Coverage |            |            |                |                |                |                |                |
|--------------------------|---------------|------------|------------|----------------|----------------|----------------|----------------|---|----------------|------------|------------|----------------|----------------|----------------|----------------|---|-------------------|------------|------------|----------------|----------------|----------------|----------------|----------------|
|                          | Whole Cell    | Whole Cell | Whole Cell | Cilia Fraction | Cilia Fraction | Cilia Fraction | Cilia Fraction |   | Whole Cell     | Whole Cell | Whole Cell | Cilia Fraction | Cilia Fraction | Cilia Fraction | Cilia Fraction |   | Whole Cell        | Whole Cell | Whole Cell | Cilia Fraction |
|                          | 1             | 2          | 6          | 4              | 3              | 5              | 7              | 8 | 1              | 2          | 6          | 4              | 3              | 5              | 7              | 8 | 1                 | 2          | 6          | 4              | 3              | 5              | 7              | 8              |
| Accession                |               |            |            |                |                |                |                |   |                |            |            |                |                |                |                |   |                   |            |            |                |                |                |                |                |
| F1SR10                   | 1             | 0          | 0          | 0              | 0              | 0              | 0              | 0 | 1              | 0          | 0          | 0              | 0              | 0              | 0              | 0 | 19.3%             | 0.0%       | 0.0%       | 0.0%           | 0.0%           | 0.0%           | 0.0%           | 0.0%           |
| tr F1SN14 F1SN14         | 1             | 0          | 0          | 0              | 0              | 0              | 0              | 0 | 1              | 0          | 0          | 0              | 0              | 0              | 0              | 0 | 1.2%              | 0.0%       | 0.0%       | 0.0%           | 0.0%           | 0.0%           | 0.0%           | 0.0%           |
| tr I3LNN4 I3LNN4         | 1             | 0          | 0          | 0              | 0              | 0              | 0              | 0 | 1              | 0          | 0          | 0              | 0              | 0              | 0              | 0 | 9.7%              | 0.0%       | 0.0%       | 0.0%           | 0.0%           | 0.0%           | 0.0%           | 0.0%           |
| tr F1S3W1 F1S3W1         | 0             | 1          | 0          | 0              | 0              | 0              | 0              | 0 | 0              | 1          | 0          | 0              | 0              | 0              | 0              | 0 | 0.0%              | 5.7%       | 0.0%       | 0.0%           | 0.0%           | 0.0%           | 0.0%           | 0.0%           |
| tr F1RS81 F1RS81         | 1             | 0          | 0          | 0              | 0              | 0              | 0              | 0 | 1              | 0          | 0          | 0              | 0              | 0              | 0              | 0 | 1.4%              | 0.0%       | 0.0%       | 0.0%           | 0.0%           | 0.0%           | 0.0%           | 0.0%           |
| tr I3LD94 I3LD94         | 1             | 0          | 0          | 0              | 0              | 0              | 0              | 0 | 1              | 0          | 0          | 0              | 0              | 0              | 0              | 0 | 14.4%             | 0.0%       | 0.0%       | 0.0%           | 0.0%           | 0.0%           | 0.0%           | 0.0%           |
| tr F1S8D2 F1S8D2         | 0             | 1          | 0          | 0              | 0              | 0              | 0              | 0 | 0              | 1          | 0          | 0              | 0              | 0              | 0              | 0 | 0.0%              | 4.0%       | 0.0%       | 0.0%           | 0.0%           | 0.0%           | 0.0%           | 0.0%           |
| tr F1RF38 F1RF38         | 1             | 0          | 0          | 0              | 0              | 0              | 0              | 0 | 1              | 0          | 0          | 0              | 0              | 0              | 0              | 0 | 6.0%              | 0.0%       | 0.0%       | 0.0%           | 0.0%           | 0.0%           | 0.0%           | 0.0%           |
| A1XQR6                   | 1             | 0          | 0          | 0              | 0              | 0              | 0              | 0 | 1              | 0          | 0          | 0              | 0              | 0              | 0              | 0 | 21.5%             | 0.0%       | 0.0%       | 0.0%           | 0.0%           | 0.0%           | 0.0%           | 0.0%           |
| tr I3LB77 I3LB77         | 0             | 1          | 0          | 0              | 0              | 0              | 0              | 0 | 0              | 1          | 0          | 0              | 0              | 0              | 0              | 0 | 0.0%              | 2.1%       | 0.0%       | 0.0%           | 0.0%           | 0.0%           | 0.0%           | 0.0%           |
| tr I3L729 I3L729         | 1             | 0          | 0          | 0              | 0              | 0              | 0              | 0 | 1              | 0          | 0          | 0              | 0              | 0              | 0              | 0 | 4.2%              | 0.0%       | 0.0%       | 0.0%           | 0.0%           | 0.0%           | 0.0%           | 0.0%           |
| tr I3LVE4 I3LVE4         | 1             | 0          | 0          | 0              | 0              | 0              | 0              | 0 | 1              | 0          | 0          | 0              | 0              | 0              | 0              | 0 | 1.5%              | 0.0%       | 0.0%       | 0.0%           | 0.0%           | 0.0%           | 0.0%           | 0.0%           |
| tr K7GS71 K7GS71         | 0             | 1          | 0          | 0              | 0              | 0              | 0              | 0 | 0              | 1          | 0          | 0              | 0              | 0              | 0              | 0 | 0.0%              | 0.8%       | 0.0%       | 0.0%           | 0.0%           | 0.0%           | 0.0%           | 0.0%           |
| tr F1RSP2 F1RSP2         | 0             | 1          | 0          | 0              | 0              | 0              | 0              | 0 | 0              | 1          | 0          | 0              | 0              | 0              | 0              | 0 | 0.0%              | 2.5%       | 0.0%       | 0.0%           | 0.0%           | 0.0%           | 0.0%           | 0.0%           |
| tr F1S4P2 F1S4P2         | 1             | 0          | 0          | 0              | 0              | 0              | 0              | 0 | 1              | 0          | 0          | 0              | 0              | 0              | 0              | 0 | 4.3%              | 0.0%       | 0.0%       | 0.0%           | 0.0%           | 0.0%           | 0.0%           | 0.0%           |
| tr F1SQR9 F1SQR9         | 1             | 0          | 0          | 0              | 0              | 0              | 0              | 0 | 1              | 0          | 0          | 0              | 0              | 0              | 0              | 0 | 6.2%              | 0.0%       | 0.0%       | 0.0%           | 0.0%           | 0.0%           | 0.0%           | 0.0%           |
| tr F1RUN0 F1RUN0         | 0             | 1          | 0          | 0              | 0              | 0              | 0              | 0 | 0              | 1          | 0          | 0              | 0              | 0              | 0              | 0 | 0.0%              | 4.7%       | 0.0%       | 0.0%           | 0.0%           | 0.0%           | 0.0%           | 0.0%           |
| tr K7GQ01 K7GQ01         | 0             | 1          | 0          | 0              | 0              | 0              | 0              | 0 | 0              | 1          | 0          | 0              | 0              | 0              | 0              | 0 | 0.0%              | 4.0%       | 0.0%       | 0.0%           | 0.0%           | 0.0%           | 0.0%           | 0.0%           |
| tr F1RMG0 F1RMG0         | 0             | 1          | 0          | 0              | 0              | 0              | 0              | 0 | 0              | 1          | 0          | 0              | 0              | 0              | 0              | 0 | 0.0%              | 1.8%       | 0.0%       | 0.0%           | 0.0%           | 0.0%           | 0.0%           | 0.0%           |
| tr F1ST67 F1ST67         | 1             | 0          | 0          | 0              | 0              | 0              | 0              | 0 | 1              | 0          | 0          | 0              | 0              | 0              | 0              | 0 | 5.8%              | 0.0%       | 0.0%       | 0.0%           | 0.0%           | 0.0%           | 0.0%           | 0.0%           |
| tr K7GLY3 K7GLY3         | 1             | 0          | 0          | 0              | 0              | 0              | 0              | 0 | 1              | 0          | 0          | 0              | 0              | 0              | 0              | 0 | 13.7%             | 0.0%       | 0.0%       | 0.0%           | 0.0%           | 0.0%           | 0.0%           | 0.0%           |
| tr F1SB02 F1SB02         | 1             | 0          | 0          | 0              | 0              | 0              | 0              | 0 | 1              | 0          | 0          | 0              | 0              | 0              | 0              | 0 | 3.4%              | 0.0%       | 0.0%       | 0.0%           | 0.0%           | 0.0%           | 0.0%           | 0.0%           |
| Q719N1                   | 1             | 0          | 0          | 0              | 0              | 0              | 0              | 0 | 1              | 0          | 0          | 0              | 0              | 0              | 0              | 0 | 3.4%              | 0.0%       | 0.0%       | 0.0%           | 0.0%           | 0.0%           | 0.0%           | 0.0%           |
| tr F1S156 F1S156         | 1             | 0          | 0          | 0              | 0              | 0              | 0              | 0 | 1              | 0          | 0          | 0              | 0              | 0              | 0              | 0 | 3.2%              | 0.0%       | 0.0%       | 0.0%           | 0.0%           | 0.0%           | 0.0%           | 0.0%           |
| tr K7GKK9 K7GKK9         | 1             | 0          | 0          | 0              | 0              | 0              | 0              | 0 | 1              | 0          | 0          | 0              | 0              | 0              | 0              | 0 | 4.7%              | 0.0%       | 0.0%       | 0.0%           | 0.0%           | 0.0%           | 0.0%           | 0.0%           |
| tr I3LQ40 I3LQ40         | 1             | 0          | 0          | 0              | 0              | 0              | 0              | 0 | 1              | 0          | 0          | 0              | 0              | 0              | 0              | 0 | 9.0%              | 0.0%       | 0.0%       | 0.0%           | 0.0%           | 0.0%           | 0.0%           | 0.0%           |
| Reverse_tr I3L8T2 I3L8T2 | 0             | 1          | 0          | 0              | 0              | 0              | 0              | 0 | 0              | 1          | 0          | 0              | 0              | 0              | 0              | 0 | 0.0%              | 2.8%       | 0.0%       | 0.0%           | 0.0%           | 0.0%           | 0.0%           | 0.0%           |
| tr F1S130 F1S130         | 1             | 0          | 0          | 0              | 0              | 0              | 0              | 0 | 1              | 0          | 0          | 0              | 0              | 0              | 0              | 0 | 7.8%              | 0.0%       | 0.0%       | 0.0%           | 0.0%           | 0.0%           | 0.0%           | 0.0%           |
| tr I3LUN6 I3LUN6         | 1             | 0          | 0          | 0              | 0              | 0              | 0              | 0 | 1              | 0          | 0          | 0              | 0              | 0              | 0              | 0 | 4.5%              | 0.0%       | 0.0%       | 0.0%           | 0.0%           | 0.0%           | 0.0%           | 0.0%           |
| tr F1SGJ7 F1SGJ7         | 1             | 0          | 0          | 0              | 0              | 0              | 0              | 0 | 1              | 0          | 0          | 0              | 0              | 0              | 0              | 0 | 3.4%              | 0.0%       | 0.0%       | 0.0%           | 0.0%           | 0.0%           | 0.0%           | 0.0%           |
| tr I3LFX1 I3LFX1         | 0             | 1          | 0          | 0              | 0              | 0              | 0              | 0 | 0              | 1          | 0          | 0              | 0              | 0              | 0              | 0 | 0.0%              | 0.9%       | 0.0%       | 0.0%           | 0.0%           | 0.0%           | 0.0%           | 0.0%           |
| tr I3LGA1 I3LGA1         | 1             | 0          | 0          | 0              | 0              | 0              | 0              | 0 | 1              | 0          | 0          | 0              | 0              | 0              | 0              | 0 | 4.3%              | 0.0%       | 0.0%       | 0.0%           | 0.0%           | 0.0%           | 0.0%           | 0.0%           |
| tr F1SFX2 F1SFX2         | 0             | 1          | 0          | 0              | 0              | 0              | 0              | 0 | 0              | 1          | 0          | 0              | 0              | 0              | 0              | 0 | 0.0%              | 2.5%       | 0.0%       | 0.0%           | 0.0%           | 0.0%           | 0.0%           | 0.0%           |
| tr I3L7Z3 I3L7Z3         | 1             | 0          | 0          | 0              | 0              | 0              | 0              | 0 | 1              | 0          | 0          | 0              | 0              | 0              | 0              | 0 | 7.4%              | 0.0%       | 0.0%       | 0.0%           | 0.0%           | 0.0%           | 0.0%           | 0.0%           |
| tr F1SG44 F1SG44         | 1             | 0          | 0          | 0              | 0              | 0              | 0              | 0 | 1              | 0          | 0          | 0              | 0              | 0              | 0              | 0 | 6.9%              | 0.0%       | 0.0%       | 0.0%           | 0.0%           | 0.0%           | 0.0%           | 0.0%           |
| tr B8Y649 B8Y649         | 1             | 0          | 0          | 0              | 0              | 0              | 0              | 0 | 1              | 0          | 0          | 0              | 0              | 0              | 0              | 0 | 12.6%             | 0.0%       | 0.0%       | 0.0%           | 0.0%           | 0.0%           | 0.0%           | 0.0%           |
| tr F1SH36 F1SH36         | 0             | 1          | 0          | 0              | 0              | 0              | 0              | 0 | 0              | 1          | 0          | 0              | 0              | 0              | 0              | 0 | 0.0%              | 2.1%       | 0.0%       | 0.0%           | 0.0%           | 0.0%           | 0.0%           | 0.0%           |
| tr F1SH07 F1SH07         | 0             | 1          | 0          | 0              | 0              | 0              | 0              | 0 | 0              | 1          | 0          | 0              | 0              | 0              | 0              | 0 | 0.0%              | 1.6%       | 0.0%       | 0.0%           | 0.0%           | 0.0%           | 0.0%           | 0.0%           |
| Q9TTB4                   | 1             | 0          | 0          | 0              | 0              | 0              | 0              | 0 | 1              | 0          | 0          | 0              | 0              | 0              | 0              | 0 | 19.7%             | 0.0%       | 0.0%       | 0.0%           | 0.0%           | 0.0%           | 0.0%           | 0.0%           |
| tr I3LAD3 I3LAD3         | 1             | 0          | 0          | 0              | 0              | 0              | 0              | 0 | 1              | 0          | 0          | 0              | 0              | 0              | 0              | 0 | 2.5%              | 0.0%       | 0.0%       | 0.0%           | 0.0%           | 0.0%           | 0.0%           | 0.0%           |
| tr I3LNU2 I3LNU2         | 1             | 0          | 0          | 0              | 0              | 0              | 0              | 0 | 1              | 0          | 0          | 0              | 0              | 0              | 0              | 0 | 1.3%              | 0.0%       | 0.0%       | 0.0%           | 0.0%           | 0.0%           | 0.0%           | 0.0%           |
| tr F1RQW9 F1RQW9         | 0             | 1          | 0          | 0              | 0              | 0              | 0              | 0 | 0              | 1          | 0          | 0              | 0              | 0              | 0              | 0 | 0.0%              | 0.9%       | 0.0%       | 0.0%           | 0.0%           | 0.0%           | 0.0%           | 0.0%           |
| tr I3LFL8 I3LFL8         | 1             | 0          | 0          | 0              | 0              | 0              | 0              | 0 | 1              | 0          | 0          | 0              | 0              | 0              | 0              | 0 | 2.2%              | 0.0%       | 0.0%       | 0.0%           | 0.0%           | 0.0%           | 0.0%           | 0.0%           |
| tr F1RN10 F1RN10         | 0             | 1          | 0          | 0              | 0              | 0              | 0              | 0 | 0              | 1          | 0          | 0              | 0              | 0              | 0              | 0 | 0.0%              | 4.1%       | 0.0%       | 0.0%           | 0.0%           | 0.0%           | 0.0%           | 0.0%           |
| tr F1S2X8 F1S2X8         | 1             | 0          | 0          | 0              | 0              | 0              | 0              | 0 | 1              | 0          | 0          | 0              | 0              | 0              | 0              | 0 | 3.3%              | 0.0%       | 0.0%       | 0.0%           | 0.0%           | 0.0%           | 0.0%           | 0.0%           |
| tr F1S834 F1S834         | 0             | 1          | 0          | 0              | 0              | 0              | 0              | 0 | 0              | 1          | 0          | 0              | 0              | 0              | 0              | 0 | 0.0%              | 4.9%       | 0.0%       | 0.0%           | 0.0%           | 0.0%           | 0.0%           | 0.0%           |
| tr K7GNB9 K7GNB9         | 1             | 0          | 0          | 0              | 0              | 0              | 0              | 0 | 1              | 0          | 0          | 0              | 0              | 0              | 0              | 0 | 12.6%             | 0.0%       | 0.0%       | 0.0%           | 0.0%           | 0.0%           | 0.0%           | 0.0%           |
| tr F1S5K3 F1S5K3         | 0             | 1          | 0          | 0              | 0              | 0              | 0              | 0 | 0              | 1          | 0          | 0              | 0              | 0              | 0              | 0 | 0.0%              | 2.5%       | 0.0%       | 0.0%           | 0.0%           | 0.0%           | 0.0%           | 0.0%           |
| tr F1RNU0 F1RNU0         | 1             | 0          | 0          | 0              | 0              | 0              | 0              | 0 | 1              | 0          | 0          | 0              | 0              | 0              | 0              | 0 | 6.1%              | 0.0%       | 0.0%       | 0.0%           | 0.0%           | 0.0%           | 0.0%           | 0.0%           |
| tr F1SR54 F1SR54         | 1             | 0          | 0          | 0              | 0              | 0              | 0              | 0 | 1              | 0          | 0          | 0              | 0              | 0              | 0              | 0 | 3.1%              | 0.0%       | 0.0%       | 0.0%           | 0.0%           | 0.0%           | 0.0%           | 0.0%           |
| tr F1SRV4 F1SRV4         | 0             | 1          | 0          | 0              | 0              | 0              | 0              | 0 | 0              | 1          | 0          | 0              | 0              | 0              | 0              | 0 | 0.0%              | 8.4%       | 0.0%       | 0.0%           | 0.0%           | 0.0%           | 0.0%           | 0.0%           |
| tr F1S4G4 F1S4G4         | 1             | 0          | 0          | 0              | 0              | 0              | 0              | 0 | 1              | 0          | 0          | 0              | 0              | 0              | 0              | 0 | 3.3%              | 0.0%       | 0.0%       | 0.0%           | 0.0%           | 0.0%           | 0.0%           | 0.0%           |
| tr F1RMQ6 F1RMQ6         | 0             | 1          | 0          | 0              | 0              | 0              | 0              | 0 | 0              | 1          | 0          | 0              | 0              | 0              | 0              | 0 | 0.0%              | 0.6%       | 0.0%       | 0.0%           | 0.0%           | 0.0%           | 0.0%           | 0.0%           |
| tr I3LDY5 I3LDY5         | 1             | 0          | 0          | 0              | 0              | 0              | 0              | 0 | 1              | 0          | 0          | 0              | 0              | 0              | 0              | 0 | 6.8%              | 0.0%       | 0.0%       | 0.0%           | 0.0%           | 0.0%           | 0.0%           | 0.0%           |
| tr F1RK57 F1RK57         | 1             | 0          | 0          | 0              | 0              | 0              | 0              | 0 | 1              | 0          | 0          | 0              | 0              | 0              | 0              | 0 | 6.1%              | 0.0%       | 0.0%       | 0.0%           | 0.0%           | 0.0%           | 0.0%           | 0.0%           |
| tr F1S1G9 F1S1G9         | 1             | 0          | 0          | 0              | 0              | 0              | 0              | 0 | 1              | 0          | 0          | 0              | 0              | 0              | 0              | 0 | 1.7%              | 0.0%       | 0.0%       | 0.0%           | 0.0%           | 0.0%           | 0.0%           | 0.0%           |
| Reverse_tr F1S9D1 F1S9D1 | 1             | 0          | 0          | 0              | 0              | 0              | 0              | 0 | 1              | 0          | 0          | 0              | 0              | 0              | 0              | 0 | 1.3%              | 0.0%       | 0.0%       | 0.0%           | 0.0%           | 0.0%           | 0.0%           | 0.0%           |
| tr K7GMC1 K7GMC1         | 1             | 0          | 0          | 0              | 0              | 0              | 0              | 0 | 1              | 0          | 0          | 0              | 0              | 0              | 0              | 0 | 25.5%             | 0.0%       | 0.0%       | 0.0%           | 0.0%           | 0.0%           | 0.0%           | 0.0%           |
| tr I3LTC2 I3LTC2         | 1             | 0          | 0          | 0              | 0              | 0              | 0              | 0 | 1              | 0          | 0          | 0              | 0              | 0              | 0              | 0 | 2.9%              | 0.0%       | 0.0%       | 0.0%           | 0.0%           | 0.0%           | 0.0%           | 0.0%           |
| Reverse_tr I3LP16 I3LP16 | 0             | 1          | 0          | 0              | 0              | 0              | 0              | 0 | 0              | 1          | 0          | 0              | 0              | 0              | 0              | 0 | 0.0%              | 6.4%       | 0.0%       | 0.0%           | 0.0%           | 0.0%           | 0.0%           | 0.0%           |
| P79432                   | 1             | 0          | 0          | 0              | 0              | 0              | 0              | 0 | 1              | 0          | 0          | 0              | 0              | 0              | 0              | 0 | 3.0%              | 0.0%       | 0.0%       | 0.0%           | 0.0%           | 0.0%           | 0.0%           | 0.0%           |
| tr F1STS2 F1STS2         | 1             | 0          | 0          | 0              | 0              | 0              | 0              | 0 | 1              | 0          | 0          | 0              | 0              | 0              | 0              | 0 | 1.6%              | 0.0%       | 0.0%       | 0.0%           | 0.0%           | 0.0%           | 0.0%           | 0.0%           |
| tr F1SHZ5 F1SHZ5         | 0             | 1          | 0          | 0              | 0              | 0              | 0              | 0 | 0              | 1          | 0          | 0              | 0              | 0              | 0              | 0 | 0.0%              | 3.4%       | 0.0%       | 0.0%           | 0.0%           | 0.0%           | 0.0%           | 0.0%           |
| tr I3LAX1 I3LAX1         | 1             | 0          | 0          | 0              |                |                |                |   |                |            |            |                |                |                |                |   |                   |            |            |                |                |                |                |                |

| Sample#                  | Peptide Count |            |            |                |                |                |                | Spectral Count |            |            |                |                |                |                | Sequence Coverage |            |            |                |                |                |                |      |
|--------------------------|---------------|------------|------------|----------------|----------------|----------------|----------------|----------------|------------|------------|----------------|----------------|----------------|----------------|-------------------|------------|------------|----------------|----------------|----------------|----------------|------|
|                          | Whole Cell    | Whole Cell | Whole Cell | Cilia Fraction | Cilia Fraction | Cilia Fraction | Cilia Fraction | Whole Cell     | Whole Cell | Whole Cell | Cilia Fraction | Cilia Fraction | Cilia Fraction | Cilia Fraction | Whole Cell        | Whole Cell | Whole Cell | Cilia Fraction | Cilia Fraction | Cilia Fraction | Cilia Fraction |      |
|                          | 1             | 2          | 6          | 4              | 3              | 5              | 7              | 1              | 2          | 6          | 4              | 3              | 5              | 7              | 1                 | 2          | 6          | 4              | 3              | 5              | 7              | 8    |
| Accession                |               |            |            |                |                |                |                |                |            |            |                |                |                |                |                   |            |            |                |                |                |                |      |
| tr F1SHU7 F1SHU7         | 1             | 0          | 0          | 0              | 0              | 0              | 0              | 0              | 1          | 0          | 0              | 0              | 0              | 0              | 0                 | 0.8%       | 0.0%       | 0.0%           | 0.0%           | 0.0%           | 0.0%           | 0.0% |
| tr I3LFD4 I3LFD4         | 1             | 0          | 0          | 0              | 0              | 0              | 0              | 0              | 1          | 0          | 0              | 0              | 0              | 0              | 0                 | 2.9%       | 0.0%       | 0.0%           | 0.0%           | 0.0%           | 0.0%           | 0.0% |
| tr F1S847 F1S847         | 1             | 0          | 0          | 0              | 0              | 0              | 0              | 0              | 1          | 0          | 0              | 0              | 0              | 0              | 0                 | 2.4%       | 0.0%       | 0.0%           | 0.0%           | 0.0%           | 0.0%           | 0.0% |
| Reverse_sp Q29126 WAP3   | 0             | 1          | 0          | 0              | 0              | 0              | 0              | 0              | 0          | 1          | 0              | 0              | 0              | 0              | 0                 | 0.0%       | 8.3%       | 0.0%           | 0.0%           | 0.0%           | 0.0%           | 0.0% |
| tr D2IE28 D2IE28         | 0             | 1          | 0          | 0              | 0              | 0              | 0              | 0              | 0          | 1          | 0              | 0              | 0              | 0              | 0                 | 0.0%       | 2.5%       | 0.0%           | 0.0%           | 0.0%           | 0.0%           | 0.0% |
| tr F1RIY7 F1RIY7         | 1             | 0          | 0          | 0              | 0              | 0              | 0              | 0              | 1          | 0          | 0              | 0              | 0              | 0              | 0                 | 2.1%       | 0.0%       | 0.0%           | 0.0%           | 0.0%           | 0.0%           | 0.0% |
| tr K7GMJ9 K7GMJ9         | 1             | 0          | 0          | 0              | 0              | 0              | 0              | 0              | 1          | 0          | 0              | 0              | 0              | 0              | 0                 | 13.3%      | 0.0%       | 0.0%           | 0.0%           | 0.0%           | 0.0%           | 0.0% |
| tr F1RH71 F1RH71         | 1             | 0          | 0          | 0              | 0              | 0              | 0              | 0              | 1          | 0          | 0              | 0              | 0              | 0              | 0                 | 11.8%      | 0.0%       | 0.0%           | 0.0%           | 0.0%           | 0.0%           | 0.0% |
| tr I3L924 I3L924         | 1             | 0          | 0          | 0              | 0              | 0              | 0              | 0              | 1          | 0          | 0              | 0              | 0              | 0              | 0                 | 8.6%       | 0.0%       | 0.0%           | 0.0%           | 0.0%           | 0.0%           | 0.0% |
| tr F1ST74 F1ST74         | 1             | 0          | 0          | 0              | 0              | 0              | 0              | 0              | 1          | 0          | 0              | 0              | 0              | 0              | 0                 | 2.1%       | 0.0%       | 0.0%           | 0.0%           | 0.0%           | 0.0%           | 0.0% |
| tr F1RZC3 F1RZC3         | 0             | 1          | 0          | 0              | 0              | 0              | 0              | 0              | 0          | 1          | 0              | 0              | 0              | 0              | 0                 | 0.0%       | 2.0%       | 0.0%           | 0.0%           | 0.0%           | 0.0%           | 0.0% |
| tr I3LPG3 I3LPG3         | 1             | 0          | 0          | 0              | 0              | 0              | 0              | 0              | 1          | 0          | 0              | 0              | 0              | 0              | 0                 | 4.6%       | 0.0%       | 0.0%           | 0.0%           | 0.0%           | 0.0%           | 0.0% |
| tr F1SJV0 F1SJV0         | 1             | 0          | 0          | 0              | 0              | 0              | 0              | 0              | 1          | 0          | 0              | 0              | 0              | 0              | 0                 | 2.1%       | 0.0%       | 0.0%           | 0.0%           | 0.0%           | 0.0%           | 0.0% |
| tr I3LTT0 I3LTT0         | 1             | 0          | 0          | 0              | 0              | 0              | 0              | 0              | 1          | 0          | 0              | 0              | 0              | 0              | 0                 | 4.9%       | 0.0%       | 0.0%           | 0.0%           | 0.0%           | 0.0%           | 0.0% |
| tr F1RHK0 F1RHK0         | 1             | 0          | 0          | 0              | 0              | 0              | 0              | 0              | 1          | 0          | 0              | 0              | 0              | 0              | 0                 | 5.2%       | 0.0%       | 0.0%           | 0.0%           | 0.0%           | 0.0%           | 0.0% |
| tr F1RIH7 F1RIH7         | 1             | 0          | 0          | 0              | 0              | 0              | 0              | 0              | 1          | 0          | 0              | 0              | 0              | 0              | 0                 | 4.2%       | 0.0%       | 0.0%           | 0.0%           | 0.0%           | 0.0%           | 0.0% |
| tr K7GRM4 K7GRM4         | 1             | 0          | 0          | 0              | 0              | 0              | 0              | 0              | 1          | 0          | 0              | 0              | 0              | 0              | 0                 | 6.7%       | 0.0%       | 0.0%           | 0.0%           | 0.0%           | 0.0%           | 0.0% |
| tr I3LVG1 I3LVG1         | 1             | 0          | 0          | 0              | 0              | 0              | 0              | 0              | 1          | 0          | 0              | 0              | 0              | 0              | 0                 | 1.3%       | 0.0%       | 0.0%           | 0.0%           | 0.0%           | 0.0%           | 0.0% |
| tr I3LA74 I3LA74         | 1             | 0          | 0          | 0              | 0              | 0              | 0              | 0              | 1          | 0          | 0              | 0              | 0              | 0              | 0                 | 3.3%       | 0.0%       | 0.0%           | 0.0%           | 0.0%           | 0.0%           | 0.0% |
| tr K7GMR9 K7GMR9         | 1             | 0          | 0          | 0              | 0              | 0              | 0              | 0              | 1          | 0          | 0              | 0              | 0              | 0              | 0                 | 6.0%       | 0.0%       | 0.0%           | 0.0%           | 0.0%           | 0.0%           | 0.0% |
| tr F1S203 F1S203         | 1             | 0          | 0          | 0              | 0              | 0              | 0              | 0              | 1          | 0          | 0              | 0              | 0              | 0              | 0                 | 1.4%       | 0.0%       | 0.0%           | 0.0%           | 0.0%           | 0.0%           | 0.0% |
| tr F1RKW4 F1RKW4         | 1             | 0          | 0          | 0              | 0              | 0              | 0              | 0              | 1          | 0          | 0              | 0              | 0              | 0              | 0                 | 1.5%       | 0.0%       | 0.0%           | 0.0%           | 0.0%           | 0.0%           | 0.0% |
| tr F1SN94 F1SN94         | 1             | 0          | 0          | 0              | 0              | 0              | 0              | 0              | 1          | 0          | 0              | 0              | 0              | 0              | 0                 | 3.6%       | 0.0%       | 0.0%           | 0.0%           | 0.0%           | 0.0%           | 0.0% |
| tr I3LSP2 I3LSP2         | 1             | 0          | 0          | 0              | 0              | 0              | 0              | 0              | 1          | 0          | 0              | 0              | 0              | 0              | 0                 | 1.5%       | 0.0%       | 0.0%           | 0.0%           | 0.0%           | 0.0%           | 0.0% |
| tr I3LAD4 I3LAD4         | 1             | 0          | 0          | 0              | 0              | 0              | 0              | 0              | 1          | 0          | 0              | 0              | 0              | 0              | 0                 | 6.2%       | 0.0%       | 0.0%           | 0.0%           | 0.0%           | 0.0%           | 0.0% |
| tr F1SDH3 F1SDH3         | 0             | 1          | 0          | 0              | 0              | 0              | 0              | 0              | 0          | 1          | 0              | 0              | 0              | 0              | 0                 | 0.0%       | 1.2%       | 0.0%           | 0.0%           | 0.0%           | 0.0%           | 0.0% |
| tr F1RMY6 F1RMY6         | 1             | 0          | 0          | 0              | 0              | 0              | 0              | 0              | 1          | 0          | 0              | 0              | 0              | 0              | 0                 | 2.8%       | 0.0%       | 0.0%           | 0.0%           | 0.0%           | 0.0%           | 0.0% |
| tr I3LF08 I3LF08         | 0             | 1          | 0          | 0              | 0              | 0              | 0              | 0              | 0          | 1          | 0              | 0              | 0              | 0              | 0                 | 0.0%       | 7.6%       | 0.0%           | 0.0%           | 0.0%           | 0.0%           | 0.0% |
| tr I3L8G5 I3L8G5         | 1             | 0          | 0          | 0              | 0              | 0              | 0              | 0              | 1          | 0          | 0              | 0              | 0              | 0              | 0                 | 8.3%       | 0.0%       | 0.0%           | 0.0%           | 0.0%           | 0.0%           | 0.0% |
| tr F1RMF1 F1RMF1         | 1             | 0          | 0          | 0              | 0              | 0              | 0              | 0              | 1          | 0          | 0              | 0              | 0              | 0              | 0                 | 4.3%       | 0.0%       | 0.0%           | 0.0%           | 0.0%           | 0.0%           | 0.0% |
| Reverse_tr F1RIP8 F1RIP8 | 1             | 0          | 0          | 0              | 0              | 0              | 0              | 0              | 1          | 0          | 0              | 0              | 0              | 0              | 0                 | 3.4%       | 0.0%       | 0.0%           | 0.0%           | 0.0%           | 0.0%           | 0.0% |
| tr F1S4G1 F1S4G1         | 1             | 0          | 0          | 0              | 0              | 0              | 0              | 0              | 1          | 0          | 0              | 0              | 0              | 0              | 0                 | 3.7%       | 0.0%       | 0.0%           | 0.0%           | 0.0%           | 0.0%           | 0.0% |
| tr F1RLY9 F1RLY9         | 1             | 0          | 0          | 0              | 0              | 0              | 0              | 0              | 1          | 0          | 0              | 0              | 0              | 0              | 0                 | 1.0%       | 0.0%       | 0.0%           | 0.0%           | 0.0%           | 0.0%           | 0.0% |
| tr I3LTE4 I3LTE4         | 1             | 0          | 0          | 0              | 0              | 0              | 0              | 0              | 1          | 0          | 0              | 0              | 0              | 0              | 0                 | 36.4%      | 0.0%       | 0.0%           | 0.0%           | 0.0%           | 0.0%           | 0.0% |
| tr I3LKS0 I3LKS0         | 0             | 1          | 0          | 0              | 0              | 0              | 0              | 0              | 0          | 1          | 0              | 0              | 0              | 0              | 0                 | 0.0%       | 3.0%       | 0.0%           | 0.0%           | 0.0%           | 0.0%           | 0.0% |
| tr I3LL40 I3LL40         | 1             | 0          | 0          | 0              | 0              | 0              | 0              | 0              | 1          | 0          | 0              | 0              | 0              | 0              | 0                 | 8.6%       | 0.0%       | 0.0%           | 0.0%           | 0.0%           | 0.0%           | 0.0% |
| tr F1RUR6 F1RUR6         | 1             | 0          | 0          | 0              | 0              | 0              | 0              | 0              | 1          | 0          | 0              | 0              | 0              | 0              | 0                 | 7.5%       | 0.0%       | 0.0%           | 0.0%           | 0.0%           | 0.0%           | 0.0% |
| tr F1S6R6 F1S6R6         | 1             | 0          | 0          | 0              | 0              | 0              | 0              | 0              | 1          | 0          | 0              | 0              | 0              | 0              | 0                 | 4.9%       | 0.0%       | 0.0%           | 0.0%           | 0.0%           | 0.0%           | 0.0% |
| tr I3L7P0 I3L7P0         | 0             | 1          | 0          | 0              | 0              | 0              | 0              | 0              | 0          | 1          | 0              | 0              | 0              | 0              | 0                 | 0.0%       | 4.6%       | 0.0%           | 0.0%           | 0.0%           | 0.0%           | 0.0% |
| tr F1SHV5 F1SHV5         | 0             | 1          | 0          | 0              | 0              | 0              | 0              | 0              | 0          | 1          | 0              | 0              | 0              | 0              | 0                 | 0.0%       | 3.1%       | 0.0%           | 0.0%           | 0.0%           | 0.0%           | 0.0% |
| tr F1S0S8 F1S0S8         | 1             | 0          | 0          | 0              | 0              | 0              | 0              | 0              | 1          | 0          | 0              | 0              | 0              | 0              | 0                 | 2.3%       | 0.0%       | 0.0%           | 0.0%           | 0.0%           | 0.0%           | 0.0% |
| Reverse_tr F1SPB1 F1SPB1 | 1             | 0          | 0          | 0              | 0              | 0              | 0              | 0              | 1          | 0          | 0              | 0              | 0              | 0              | 0                 | 8.4%       | 0.0%       | 0.0%           | 0.0%           | 0.0%           | 0.0%           | 0.0% |
| tr I3L8P1 I3L8P1         | 1             | 0          | 0          | 0              | 0              | 0              | 0              | 0              | 1          | 0          | 0              | 0              | 0              | 0              | 0                 | 4.1%       | 0.0%       | 0.0%           | 0.0%           | 0.0%           | 0.0%           | 0.0% |
| tr I3LS94 I3LS94         | 0             | 1          | 0          | 0              | 0              | 0              | 0              | 0              | 0          | 1          | 0              | 0              | 0              | 0              | 0                 | 0.0%       | 2.8%       | 0.0%           | 0.0%           | 0.0%           | 0.0%           | 0.0% |
| tr I3LMZ3 I3LMZ3         | 1             | 0          | 0          | 0              | 0              | 0              | 0              | 0              | 1          | 0          | 0              | 0              | 0              | 0              | 0                 | 6.4%       | 0.0%       | 0.0%           | 0.0%           | 0.0%           | 0.0%           | 0.0% |
| tr F1S7H5 F1S7H5         | 1             | 0          | 0          | 0              | 0              | 0              | 0              | 0              | 1          | 0          | 0              | 0              | 0              | 0              | 0                 | 15.4%      | 0.0%       | 0.0%           | 0.0%           | 0.0%           | 0.0%           | 0.0% |
| tr F1RP70 F1RP70         | 1             | 0          | 0          | 0              | 0              | 0              | 0              | 0              | 1          | 0          | 0              | 0              | 0              | 0              | 0                 | 1.4%       | 0.0%       | 0.0%           | 0.0%           | 0.0%           | 0.0%           | 0.0% |
| tr F1SIT5 F1SIT5         | 1             | 0          | 0          | 0              | 0              | 0              | 0              | 0              | 1          | 0          | 0              | 0              | 0              | 0              | 0                 | 3.8%       | 0.0%       | 0.0%           | 0.0%           | 0.0%           | 0.0%           | 0.0% |
| tr F1SL48 F1SL48         | 1             | 0          | 0          | 0              | 0              | 0              | 0              | 0              | 1          | 0          | 0              | 0              | 0              | 0              | 0                 | 4.2%       | 0.0%       | 0.0%           | 0.0%           | 0.0%           | 0.0%           | 0.0% |
| tr I3LKD1 I3LKD1         | 1             | 0          | 0          | 0              | 0              | 0              | 0              | 0              | 1          | 0          | 0              | 0              | 0              | 0              | 0                 | 4.5%       | 0.0%       | 0.0%           | 0.0%           | 0.0%           | 0.0%           | 0.0% |
| tr F1SRA8 F1SRA8         | 1             | 0          | 0          | 0              | 0              | 0              | 0              | 0              | 1          | 0          | 0              | 0              | 0              | 0              | 0                 | 0.8%       | 0.0%       | 0.0%           | 0.0%           | 0.0%           | 0.0%           | 0.0% |
| tr I3LGV6 I3LGV6         | 0             | 1          | 0          | 0              | 0              | 0              | 0              | 0              | 0          | 1          | 0              | 0              | 0              | 0              | 0                 | 0.0%       | 1.3%       | 0.0%           | 0.0%           | 0.0%           | 0.0%           | 0.0% |
| tr I3LEI3 I3LEI3         | 1             | 0          | 0          | 0              | 0              | 0              | 0              | 0              | 1          | 0          | 0              | 0              | 0              | 0              | 0                 | 7.6%       | 0.0%       | 0.0%           | 0.0%           | 0.0%           | 0.0%           | 0.0% |
| tr F1RIX8 F1RIX8         | 1             | 0          | 0          | 0              | 0              | 0              | 0              | 0              | 1          | 0          | 0              | 0              | 0              | 0              | 0                 | 9.2%       | 0.0%       | 0.0%           | 0.0%           | 0.0%           | 0.0%           | 0.0% |
| tr F1RYM2 F1RYM2         | 1             | 0          | 0          | 0              | 0              | 0              | 0              | 0              | 1          | 0          | 0              | 0              | 0              | 0              | 0                 | 1.0%       | 0.0%       | 0.0%           | 0.0%           | 0.0%           | 0.0%           | 0.0% |
| Reverse_tr F1SQ11 F1SQ11 | 1             | 0          | 0          | 0              | 0              | 0              | 0              | 0              | 1          | 0          | 0              | 0              | 0              | 0              | 0                 | 1.3%       | 0.0%       | 0.0%           | 0.0%           | 0.0%           | 0.0%           | 0.0% |
| tr I3LAN7 I3LAN7         | 1             | 0          | 0          | 0              | 0              | 0              | 0              | 0              | 1          | 0          | 0              | 0              | 0              | 0              | 0                 | 4.0%       | 0.0%       | 0.0%           | 0.0%           | 0.0%           | 0.0%           | 0.0% |
| tr F1RIA1 F1RIA1         | 1             | 0          | 0          | 0              | 0              | 0              | 0              | 0              | 1          | 0          | 0              | 0              | 0              | 0              | 0                 | 12.7%      | 0.0%       | 0.0%           | 0.0%           | 0.0%           | 0.0%           | 0.0% |
| tr I3LQF3 I3LQF3         | 0             | 1          | 0          | 0              | 0              | 0              | 0              | 0              | 0          | 1          | 0              | 0              | 0              | 0              | 0                 | 0.0%       | 2.3%       | 0.0%           | 0.0%           | 0.0%           | 0.0%           | 0.0% |
| tr F1RXT5 F1RXT5         | 1             | 0          | 0          | 0              | 0              | 0              | 0              | 0              | 1          | 0          | 0              | 0              | 0              | 0              | 0                 | 1.1%       | 0.0%       | 0.0%           | 0.0%           | 0.0%           | 0.0%           | 0.0% |
| tr I3LG75 I3LG75         | 0             | 1          | 0          | 0              | 0              | 0              | 0              | 0              | 0          | 1          | 0              | 0              | 0              | 0              | 0                 | 0.0%       | 4.5%       | 0.0%           | 0.0%           | 0.0%           | 0.0%           | 0.0% |
| Reverse_tr F1RP36 F1RP36 | 0             | 1          | 0          | 0              | 0              | 0              | 0              | 0              | 0          | 1          | 0              | 0              | 0              | 0              | 0                 | 0.0%       | 3.6%       | 0.0%           | 0.0%           | 0.0%           | 0.0%           | 0.0% |
| Reverse_tr I3LRH0 I3LRH0 | 0             | 1          | 0          | 0              | 0              | 0              | 0              | 0              | 0          | 1          | 0              | 0              | 0              | 0              | 0                 | 0.0%       | 0.9%       | 0.0%           | 0.0%           | 0.0%           | 0.0%           | 0.0% |
| tr F1S449 F1S449         | 1             | 0          | 0          | 0              | 0              | 0              | 0              | 0              | 1          | 0          | 0              | 0              | 0              | 0              | 0                 | 3.0%       | 0.0%       | 0.0%           | 0.0%           | 0.0%           | 0.0%           | 0.0% |
| tr I3LFD9 I3LFD9         | 0             | 1          | 0          | 0              | 0              | 0              | 0              | 0              | 0          | 1          | 0              | 0              | 0              | 0              | 0                 | 0.0%       | 1.1%       | 0.0%           | 0.0%           | 0.0%           | 0.0%           | 0.0% |
| tr F1SE54 F1SE54         | 1             | 0          | 0          | 0              | 0              | 0              | 0              | 0              | 1          | 0          | 0              | 0              | 0              | 0              | 0                 | 2.9%       | 0.0%       | 0.0%           | 0.0%           | 0.0%           | 0.0%           | 0.0% |
| tr I3LQI7 I3LQI7         | 1             | 0          | 0          | 0              | 0              | 0              | 0              | 0              | 1          | 0          | 0              | 0              | 0              | 0              | 0                 | 3.6%       | 0.0%       | 0.0%           | 0.0%           | 0.0%           | 0.0%           | 0.0% |
| tr F1RW11 F1RW11         | 1             | 0          | 0          | 0              | 0              | 0              | 0              | 0              | 1          | 0          | 0              | 0              | 0              | 0              | 0                 | 4.6%       | 0.0%       | 0.0%           | 0.0%           | 0.0%           | 0.0%           | 0.0% |
| tr F1RX25 F1RX25         | 1             | 0          | 0          | 0              | 0              | 0              | 0              | 0              | 1          | 0          | 0              | 0              | 0              | 0              | 0                 | 2.4%       | 0.0%       | 0.0%           | 0.0%           | 0.0%           | 0.0%           | 0.0% |
| tr I3LS55 I3LS55         | 1             | 0          | 0          | 0              |                |                |                |                |            |            |                |                |                |                |                   |            |            |                |                |                |                |      |

| Accession                | Sample# | Peptide Count |            |            |                |                |                |                | Spectral Count |            |            |                |                |                |                | Sequence Coverage |            |            |                |                |                |                |      |
|--------------------------|---------|---------------|------------|------------|----------------|----------------|----------------|----------------|----------------|------------|------------|----------------|----------------|----------------|----------------|-------------------|------------|------------|----------------|----------------|----------------|----------------|------|
|                          |         | Whole Cell    | Whole Cell | Whole Cell | Cilia Fraction | Cilia Fraction | Cilia Fraction | Cilia Fraction | Whole Cell     | Whole Cell | Whole Cell | Cilia Fraction | Cilia Fraction | Cilia Fraction | Cilia Fraction | Whole Cell        | Whole Cell | Whole Cell | Cilia Fraction | Cilia Fraction | Cilia Fraction | Cilia Fraction |      |
|                          |         | 1             | 2          | 6          | 4              | 3              | 5              | 7              | 1              | 2          | 6          | 4              | 3              | 5              | 7              | 1                 | 2          | 6          | 4              | 3              | 5              | 7              | 8    |
| tr K7GN18 K7GN18         |         | 1             | 0          | 0          | 0              | 0              | 0              | 0              | 1              | 0          | 0          | 0              | 0              | 0              | 0              | 9.3%              | 0.0%       | 0.0%       | 0.0%           | 0.0%           | 0.0%           | 0.0%           | 0.0% |
| tr I3LNX7 I3LNX7         |         | 1             | 0          | 0          | 0              | 0              | 0              | 0              | 1              | 0          | 0          | 0              | 0              | 0              | 0              | 6.4%              | 0.0%       | 0.0%       | 0.0%           | 0.0%           | 0.0%           | 0.0%           | 0.0% |
| tr I3LAX4 I3LAX4         |         | 1             | 0          | 0          | 0              | 0              | 0              | 0              | 1              | 0          | 0          | 0              | 0              | 0              | 0              | 5.4%              | 0.0%       | 0.0%       | 0.0%           | 0.0%           | 0.0%           | 0.0%           | 0.0% |
| tr F1SJG3 F1SJG3         |         | 0             | 1          | 0          | 0              | 0              | 0              | 0              | 0              | 1          | 0          | 0              | 0              | 0              | 0              | 0.0%              | 8.7%       | 0.0%       | 0.0%           | 0.0%           | 0.0%           | 0.0%           | 0.0% |
| tr I3LMK3 I3LMK3         |         | 0             | 1          | 0          | 0              | 0              | 0              | 0              | 0              | 1          | 0          | 0              | 0              | 0              | 0              | 0.0%              | 6.8%       | 0.0%       | 0.0%           | 0.0%           | 0.0%           | 0.0%           | 0.0% |
| Reverse_tr F1S8Y2 F1S8Y2 |         | 0             | 1          | 0          | 0              | 0              | 0              | 0              | 0              | 1          | 0          | 0              | 0              | 0              | 0              | 0.0%              | 1.8%       | 0.0%       | 0.0%           | 0.0%           | 0.0%           | 0.0%           | 0.0% |
| tr F1S5B2 F1S5B2         |         | 1             | 0          | 0          | 0              | 0              | 0              | 0              | 1              | 0          | 0          | 0              | 0              | 0              | 0              | 7.6%              | 0.0%       | 0.0%       | 0.0%           | 0.0%           | 0.0%           | 0.0%           | 0.0% |
| tr I3LB11 I3LB11         |         | 1             | 0          | 0          | 0              | 0              | 0              | 0              | 1              | 0          | 0          | 0              | 0              | 0              | 0              | 1.6%              | 0.0%       | 0.0%       | 0.0%           | 0.0%           | 0.0%           | 0.0%           | 0.0% |
| tr K7GN09 K7GN09         |         | 1             | 0          | 0          | 0              | 0              | 0              | 0              | 1              | 0          | 0          | 0              | 0              | 0              | 0              | 2.1%              | 0.0%       | 0.0%       | 0.0%           | 0.0%           | 0.0%           | 0.0%           | 0.0% |
| tr F1SBX4 F1SBX4         |         | 1             | 0          | 0          | 0              | 0              | 0              | 0              | 1              | 0          | 0          | 0              | 0              | 0              | 0              | 6.0%              | 0.0%       | 0.0%       | 0.0%           | 0.0%           | 0.0%           | 0.0%           | 0.0% |
| tr F1RIY6 F1RIY6         |         | 1             | 0          | 0          | 0              | 0              | 0              | 0              | 1              | 0          | 0          | 0              | 0              | 0              | 0              | 6.6%              | 0.0%       | 0.0%       | 0.0%           | 0.0%           | 0.0%           | 0.0%           | 0.0% |
| tr I3LFZ4 I3LFZ4         |         | 1             | 0          | 0          | 0              | 0              | 0              | 0              | 1              | 0          | 0          | 0              | 0              | 0              | 0              | 3.3%              | 0.0%       | 0.0%       | 0.0%           | 0.0%           | 0.0%           | 0.0%           | 0.0% |
| tr F1S451 F1S451         |         | 1             | 0          | 0          | 0              | 0              | 0              | 0              | 1              | 0          | 0          | 0              | 0              | 0              | 0              | 7.2%              | 0.0%       | 0.0%       | 0.0%           | 0.0%           | 0.0%           | 0.0%           | 0.0% |
| tr F1SD77 F1SD77         |         | 1             | 0          | 0          | 0              | 0              | 0              | 0              | 1              | 0          | 0          | 0              | 0              | 0              | 0              | 10.2%             | 0.0%       | 0.0%       | 0.0%           | 0.0%           | 0.0%           | 0.0%           | 0.0% |
| tr F1SCS4 F1SCS4         |         | 0             | 1          | 0          | 0              | 0              | 0              | 0              | 0              | 1          | 0          | 0              | 0              | 0              | 0              | 0.0%              | 1.3%       | 0.0%       | 0.0%           | 0.0%           | 0.0%           | 0.0%           | 0.0% |
| tr I3LT29 I3LT29         |         | 1             | 0          | 0          | 0              | 0              | 0              | 0              | 1              | 0          | 0          | 0              | 0              | 0              | 0              | 21.1%             | 0.0%       | 0.0%       | 0.0%           | 0.0%           | 0.0%           | 0.0%           | 0.0% |
| tr F1SC67 F1SC67         |         | 1             | 0          | 0          | 0              | 0              | 0              | 0              | 1              | 0          | 0          | 0              | 0              | 0              | 0              | 1.5%              | 0.0%       | 0.0%       | 0.0%           | 0.0%           | 0.0%           | 0.0%           | 0.0% |
| tr I3L7K4 I3L7K4         |         | 0             | 1          | 0          | 0              | 0              | 0              | 0              | 0              | 1          | 0          | 0              | 0              | 0              | 0              | 0.0%              | 3.0%       | 0.0%       | 0.0%           | 0.0%           | 0.0%           | 0.0%           | 0.0% |
| tr F1S0Y7 F1S0Y7         |         | 0             | 1          | 0          | 0              | 0              | 0              | 0              | 0              | 1          | 0          | 0              | 0              | 0              | 0              | 0.0%              | 4.8%       | 0.0%       | 0.0%           | 0.0%           | 0.0%           | 0.0%           | 0.0% |
| tr F1SN83 F1SN83         |         | 1             | 0          | 0          | 0              | 0              | 0              | 0              | 1              | 0          | 0          | 0              | 0              | 0              | 0              | 2.7%              | 0.0%       | 0.0%       | 0.0%           | 0.0%           | 0.0%           | 0.0%           | 0.0% |
| tr K7GP56 K7GP56         |         | 1             | 0          | 0          | 0              | 0              | 0              | 0              | 1              | 0          | 0          | 0              | 0              | 0              | 0              | 29.4%             | 0.0%       | 0.0%       | 0.0%           | 0.0%           | 0.0%           | 0.0%           | 0.0% |
| tr B6CVL4 B6CVL4         |         | 1             | 0          | 0          | 0              | 0              | 0              | 0              | 1              | 0          | 0          | 0              | 0              | 0              | 0              | 1.3%              | 0.0%       | 0.0%       | 0.0%           | 0.0%           | 0.0%           | 0.0%           | 0.0% |
| tr I3LE25 I3LE25         |         | 1             | 0          | 0          | 0              | 0              | 0              | 0              | 1              | 0          | 0          | 0              | 0              | 0              | 0              | 2.4%              | 0.0%       | 0.0%       | 0.0%           | 0.0%           | 0.0%           | 0.0%           | 0.0% |
| tr F1SH87 F1SH87         |         | 1             | 0          | 0          | 0              | 0              | 0              | 0              | 1              | 0          | 0          | 0              | 0              | 0              | 0              | 3.9%              | 0.0%       | 0.0%       | 0.0%           | 0.0%           | 0.0%           | 0.0%           | 0.0% |
| tr F1S283 F1S283         |         | 1             | 0          | 0          | 0              | 0              | 0              | 0              | 1              | 0          | 0          | 0              | 0              | 0              | 0              | 7.7%              | 0.0%       | 0.0%       | 0.0%           | 0.0%           | 0.0%           | 0.0%           | 0.0% |
| tr I3LGA8 I3LGA8         |         | 1             | 0          | 0          | 0              | 0              | 0              | 0              | 1              | 0          | 0          | 0              | 0              | 0              | 0              | 4.6%              | 0.0%       | 0.0%       | 0.0%           | 0.0%           | 0.0%           | 0.0%           | 0.0% |
| tr F1S213 F1S213         |         | 0             | 1          | 0          | 0              | 0              | 0              | 0              | 0              | 1          | 0          | 0              | 0              | 0              | 0              | 0.0%              | 4.8%       | 0.0%       | 0.0%           | 0.0%           | 0.0%           | 0.0%           | 0.0% |
| tr F1S125 F1S125         |         | 1             | 0          | 0          | 0              | 0              | 0              | 0              | 1              | 0          | 0          | 0              | 0              | 0              | 0              | 5.4%              | 0.0%       | 0.0%       | 0.0%           | 0.0%           | 0.0%           | 0.0%           | 0.0% |
| tr F1S7T6 F1S7T6         |         | 1             | 0          | 0          | 0              | 0              | 0              | 0              | 1              | 0          | 0          | 0              | 0              | 0              | 0              | 6.8%              | 0.0%       | 0.0%       | 0.0%           | 0.0%           | 0.0%           | 0.0%           | 0.0% |
| tr I3L751 I3L751         |         | 1             | 0          | 0          | 0              | 0              | 0              | 0              | 1              | 0          | 0          | 0              | 0              | 0              | 0              | 5.2%              | 0.0%       | 0.0%       | 0.0%           | 0.0%           | 0.0%           | 0.0%           | 0.0% |
| tr F1RNH1 F1RNH1         |         | 0             | 1          | 0          | 0              | 0              | 0              | 0              | 0              | 1          | 0          | 0              | 0              | 0              | 0              | 0.0%              | 3.9%       | 0.0%       | 0.0%           | 0.0%           | 0.0%           | 0.0%           | 0.0% |
| tr F1S5P5 F1S5P5         |         | 1             | 0          | 0          | 0              | 0              | 0              | 0              | 1              | 0          | 0          | 0              | 0              | 0              | 0              | 1.9%              | 0.0%       | 0.0%       | 0.0%           | 0.0%           | 0.0%           | 0.0%           | 0.0% |
| tr F1RTP5 F1RTP5         |         | 1             | 0          | 0          | 0              | 0              | 0              | 0              | 1              | 0          | 0          | 0              | 0              | 0              | 0              | 1.6%              | 0.0%       | 0.0%       | 0.0%           | 0.0%           | 0.0%           | 0.0%           | 0.0% |
| tr F1S478 F1S478         |         | 0             | 1          | 0          | 0              | 0              | 0              | 0              | 0              | 1          | 0          | 0              | 0              | 0              | 0              | 0.0%              | 4.2%       | 0.0%       | 0.0%           | 0.0%           | 0.0%           | 0.0%           | 0.0% |
| tr K7GMW4 K7GMW4         |         | 1             | 0          | 0          | 0              | 0              | 0              | 0              | 1              | 0          | 0          | 0              | 0              | 0              | 0              | 2.3%              | 0.0%       | 0.0%       | 0.0%           | 0.0%           | 0.0%           | 0.0%           | 0.0% |
| tr I3LS01 I3LS01         |         | 0             | 1          | 0          | 0              | 0              | 0              | 0              | 0              | 1          | 0          | 0              | 0              | 0              | 0              | 0.0%              | 0.9%       | 0.0%       | 0.0%           | 0.0%           | 0.0%           | 0.0%           | 0.0% |
| tr I3LI96 I3LI96         |         | 1             | 0          | 0          | 0              | 0              | 0              | 0              | 1              | 0          | 0          | 0              | 0              | 0              | 0              | 5.3%              | 0.0%       | 0.0%       | 0.0%           | 0.0%           | 0.0%           | 0.0%           | 0.0% |
| tr K7GKY4 K7GKY4         |         | 1             | 0          | 0          | 0              | 0              | 0              | 0              | 1              | 0          | 0          | 0              | 0              | 0              | 0              | 7.0%              | 0.0%       | 0.0%       | 0.0%           | 0.0%           | 0.0%           | 0.0%           | 0.0% |
| tr F1RMH4 F1RMH4         |         | 1             | 0          | 0          | 0              | 0              | 0              | 0              | 1              | 0          | 0          | 0              | 0              | 0              | 0              | 1.5%              | 0.0%       | 0.0%       | 0.0%           | 0.0%           | 0.0%           | 0.0%           | 0.0% |
| tr F1S1C7 F1S1C7         |         | 1             | 0          | 0          | 0              | 0              | 0              | 0              | 1              | 0          | 0          | 0              | 0              | 0              | 0              | 8.2%              | 0.0%       | 0.0%       | 0.0%           | 0.0%           | 0.0%           | 0.0%           | 0.0% |
| tr F1RGP9 F1RGP9         |         | 1             | 0          | 0          | 0              | 0              | 0              | 0              | 1              | 0          | 0          | 0              | 0              | 0              | 0              | 9.9%              | 0.0%       | 0.0%       | 0.0%           | 0.0%           | 0.0%           | 0.0%           | 0.0% |
| tr F1RIY2 F1RIY2         |         | 1             | 0          | 0          | 0              | 0              | 0              | 0              | 1              | 0          | 0          | 0              | 0              | 0              | 0              | 10.5%             | 0.0%       | 0.0%       | 0.0%           | 0.0%           | 0.0%           | 0.0%           | 0.0% |
| tr F1RU17 F1RU17         |         | 1             | 0          | 0          | 0              | 0              | 0              | 0              | 1              | 0          | 0          | 0              | 0              | 0              | 0              | 3.7%              | 0.0%       | 0.0%       | 0.0%           | 0.0%           | 0.0%           | 0.0%           | 0.0% |
| tr F1RN84 F1RN84         |         | 1             | 0          | 0          | 0              | 0              | 0              | 0              | 1              | 0          | 0          | 0              | 0              | 0              | 0              | 0.7%              | 0.0%       | 0.0%       | 0.0%           | 0.0%           | 0.0%           | 0.0%           | 0.0% |
| tr F1RUU2 F1RUU2         |         | 1             | 0          | 0          | 0              | 0              | 0              | 0              | 1              | 0          | 0          | 0              | 0              | 0              | 0              | 10.4%             | 0.0%       | 0.0%       | 0.0%           | 0.0%           | 0.0%           | 0.0%           | 0.0% |
| tr F1SD84 F1SD84         |         | 1             | 0          | 0          | 0              | 0              | 0              | 0              | 1              | 0          | 0          | 0              | 0              | 0              | 0              | 6.6%              | 0.0%       | 0.0%       | 0.0%           | 0.0%           | 0.0%           | 0.0%           | 0.0% |
| tr F1SA24 F1SA24         |         | 1             | 0          | 0          | 0              | 0              | 0              | 0              | 1              | 0          | 0          | 0              | 0              | 0              | 0              | 3.4%              | 0.0%       | 0.0%       | 0.0%           | 0.0%           | 0.0%           | 0.0%           | 0.0% |
| Q9MZU4                   |         | 1             | 0          | 0          | 0              | 0              | 0              | 0              | 1              | 0          | 0          | 0              | 0              | 0              | 0              | 7.7%              | 0.0%       | 0.0%       | 0.0%           | 0.0%           | 0.0%           | 0.0%           | 0.0% |
| tr K7GSM8 K7GSM8         |         | 1             | 0          | 0          | 0              | 0              | 0              | 0              | 1              | 0          | 0          | 0              | 0              | 0              | 0              | 9.8%              | 0.0%       | 0.0%       | 0.0%           | 0.0%           | 0.0%           | 0.0%           | 0.0% |
| tr I3LSI7 I3LSI7         |         | 1             | 0          | 0          | 0              | 0              | 0              | 0              | 1              | 0          | 0          | 0              | 0              | 0              | 0              | 4.8%              | 0.0%       | 0.0%       | 0.0%           | 0.0%           | 0.0%           | 0.0%           | 0.0% |
| Reverse_tr F1RG65 F1RG65 |         | 1             | 0          | 0          | 0              | 0              | 0              | 0              | 1              | 0          | 0          | 0              | 0              | 0              | 0              | 1.4%              | 0.0%       | 0.0%       | 0.0%           | 0.0%           | 0.0%           | 0.0%           | 0.0% |
| tr F1SDX6 F1SDX6         |         | 1             | 0          | 0          | 0              | 0              | 0              | 0              | 1              | 0          | 0          | 0              | 0              | 0              | 0              | 1.7%              | 0.0%       | 0.0%       | 0.0%           | 0.0%           | 0.0%           | 0.0%           | 0.0% |
| tr F1SA85 F1SA85         |         | 1             | 0          | 0          | 0              | 0              | 0              | 0              | 1              | 0          | 0          | 0              | 0              | 0              | 0              | 2.1%              | 0.0%       | 0.0%       | 0.0%           | 0.0%           | 0.0%           | 0.0%           | 0.0% |
| tr F1RKX2 F1RKX2         |         | 1             | 0          | 0          | 0              | 0              | 0              | 0              | 1              | 0          | 0          | 0              | 0              | 0              | 0              | 5.1%              | 0.0%       | 0.0%       | 0.0%           | 0.0%           | 0.0%           | 0.0%           | 0.0% |
| tr F1S6G5 F1S6G5         |         | 0             | 1          | 0          | 0              | 0              | 0              | 0              | 0              | 1          | 0          | 0              | 0              | 0              | 0              | 0.0%              | 9.8%       | 0.0%       | 0.0%           | 0.0%           | 0.0%           | 0.0%           | 0.0% |
| tr F1SGI4 F1SGI4         |         | 1             | 0          | 0          | 0              | 0              | 0              | 0              | 1              | 0          | 0          | 0              | 0              | 0              | 0              | 5.0%              | 0.0%       | 0.0%       | 0.0%           | 0.0%           | 0.0%           | 0.0%           | 0.0% |
| tr I3LGP5 I3LGP5         |         | 1             | 0          | 0          | 0              | 0              | 0              | 0              | 1              | 0          | 0          | 0              | 0              | 0              | 0              | 3.7%              | 0.0%       | 0.0%       | 0.0%           | 0.0%           | 0.0%           | 0.0%           | 0.0% |
| tr I3LLQ1 I3LLQ1         |         | 0             | 1          | 0          | 0              | 0              | 0              | 0              | 0              | 1          | 0          | 0              | 0              | 0              | 0              | 0.0%              | 19.3%      | 0.0%       | 0.0%           | 0.0%           | 0.0%           | 0.0%           | 0.0% |
| tr I3LGT4 I3LGT4         |         | 1             | 0          | 0          | 0              | 0              | 0              | 0              | 1              | 0          | 0          | 0              | 0              | 0              | 0              | 10.2%             | 0.0%       | 0.0%       | 0.0%           | 0.0%           | 0.0%           | 0.0%           | 0.0% |
| tr F1SGI1 F1SGI1         |         | 0             | 1          | 0          | 0              | 0              | 0              | 0              | 0              | 1          | 0          | 0              | 0              | 0              | 0              | 0.0%              | 12.9%      | 0.0%       | 0.0%           | 0.0%           | 0.0%           | 0.0%           | 0.0% |
| tr F1RZN9 F1RZN9         |         | 0             | 1          | 0          | 0              | 0              | 0              | 0              | 0              | 1          | 0          | 0              | 0              | 0              | 0              | 0.0%              | 5.9%       | 0.0%       | 0.0%           | 0.0%           | 0.0%           | 0.0%           | 0.0% |
| tr I3L9K3 I3L9K3         |         | 1             | 0          | 0          | 0              | 0              | 0              | 0              | 1              | 0          | 0          | 0              | 0              | 0              | 0              | 1.2%              | 0.0%       | 0.0%       | 0.0%           | 0.0%           | 0.0%           | 0.0%           | 0.0% |
| tr K7GRM1 K7GRM1         |         | 1             | 0          | 0          | 0              | 0              | 0              | 0              | 1              | 0          | 0          | 0              | 0              | 0              | 0              | 5.3%              | 0.0%       | 0.0%       | 0.0%           | 0.0%           | 0.0%           | 0.0%           | 0.0% |
| Reverse_tr F1S4P1 F1S4P1 |         | 0             | 1          | 0          | 0              | 0              | 0              | 0              | 0              | 1          | 0          | 0              | 0              | 0              | 0              | 0.0%              | 0.3%       | 0.0%       | 0.0%           | 0.0%           | 0.0%           | 0.0%           | 0.0% |
| A5GZW8                   |         | 1             | 0          | 0          | 0              | 0              | 0              | 0              | 1              | 0          | 0          | 0              | 0              | 0              | 0              | 6.3%              | 0.0%       | 0.0%       | 0.0%           | 0.0%           | 0.0%           | 0.0%           | 0.0% |
| tr F1RSB9 F1RSB9         |         | 0             | 1          | 0          | 0              | 0              | 0              | 0              | 0              | 1          | 0          | 0              | 0              | 0              | 0              | 0.0%              | 4.6%       | 0.0%       | 0.0%           | 0.0%           | 0.0%           | 0.0%           | 0.0% |
| tr F1RFR1 F1RFR1         |         | 1             | 0          | 0          | 0              | 0              | 0              | 0              | 1              | 0          | 0          | 0              | 0              | 0              | 0              | 2.0%              | 0.0%       | 0.0%       | 0.0%           | 0.0%           | 0.0%           | 0.0%           | 0.0% |
| tr F1RL05 F1RL05         |         | 1             | 0          | 0          | 0              |                |                |                |                |            |            |                |                |                |                |                   |            |            |                |                |                |                |      |

| Sample#                  | Peptide Count |            |            |                |                |                |                |   | Spectral Count |            |            |                |                |                |                |   | Sequence Coverage |            |            |                |                |                |                |                |
|--------------------------|---------------|------------|------------|----------------|----------------|----------------|----------------|---|----------------|------------|------------|----------------|----------------|----------------|----------------|---|-------------------|------------|------------|----------------|----------------|----------------|----------------|----------------|
|                          | Whole Cell    | Whole Cell | Whole Cell | Cilia Fraction | Cilia Fraction | Cilia Fraction | Cilia Fraction |   | Whole Cell     | Whole Cell | Whole Cell | Cilia Fraction | Cilia Fraction | Cilia Fraction | Cilia Fraction |   | Whole Cell        | Whole Cell | Whole Cell | Cilia Fraction |
|                          | 1             | 2          | 6          | 4              | 3              | 5              | 7              | 8 | 1              | 2          | 6          | 4              | 3              | 5              | 7              | 8 | 1                 | 2          | 6          | 4              | 3              | 5              | 7              | 8              |
| Accession                |               |            |            |                |                |                |                |   |                |            |            |                |                |                |                |   |                   |            |            |                |                |                |                |                |
| tr F1STR8 F1STR8         | 1             | 0          | 0          | 0              | 0              | 0              | 0              | 0 | 1              | 0          | 0          | 0              | 0              | 0              | 0              | 0 | 2.9%              | 0.0%       | 0.0%       | 0.0%           | 0.0%           | 0.0%           | 0.0%           | 0.0%           |
| Reverse_tr F1S5P5 F1S5P5 | 1             | 0          | 0          | 0              | 0              | 0              | 0              | 0 | 1              | 0          | 0          | 0              | 0              | 0              | 0              | 0 | 2.7%              | 0.0%       | 0.0%       | 0.0%           | 0.0%           | 0.0%           | 0.0%           | 0.0%           |
| tr F1SVC8 F1SVC8         | 1             | 0          | 0          | 0              | 0              | 0              | 0              | 0 | 1              | 0          | 0          | 0              | 0              | 0              | 0              | 0 | 1.9%              | 0.0%       | 0.0%       | 0.0%           | 0.0%           | 0.0%           | 0.0%           | 0.0%           |
| tr F1SR84 F1SR84         | 1             | 0          | 0          | 0              | 0              | 0              | 0              | 0 | 1              | 0          | 0          | 0              | 0              | 0              | 0              | 0 | 1.1%              | 0.0%       | 0.0%       | 0.0%           | 0.0%           | 0.0%           | 0.0%           | 0.0%           |
| tr F1SLG6 F1SLG6         | 0             | 1          | 0          | 0              | 0              | 0              | 0              | 0 | 0              | 1          | 0          | 0              | 0              | 0              | 0              | 0 | 0.0%              | 4.7%       | 0.0%       | 0.0%           | 0.0%           | 0.0%           | 0.0%           | 0.0%           |
| Reverse_tr F1RM51 F1RM51 | 0             | 1          | 0          | 0              | 0              | 0              | 0              | 0 | 0              | 1          | 0          | 0              | 0              | 0              | 0              | 0 | 0.0%              | 3.8%       | 0.0%       | 0.0%           | 0.0%           | 0.0%           | 0.0%           | 0.0%           |
| tr F1S7C3 F1S7C3         | 1             | 0          | 0          | 0              | 0              | 0              | 0              | 0 | 1              | 0          | 0          | 0              | 0              | 0              | 0              | 0 | 2.4%              | 0.0%       | 0.0%       | 0.0%           | 0.0%           | 0.0%           | 0.0%           | 0.0%           |
| tr F1RJ12 F1RJ12         | 1             | 0          | 0          | 0              | 0              | 0              | 0              | 0 | 1              | 0          | 0          | 0              | 0              | 0              | 0              | 0 | 5.5%              | 0.0%       | 0.0%       | 0.0%           | 0.0%           | 0.0%           | 0.0%           | 0.0%           |
| tr I3LE86 I3LE86         | 0             | 1          | 0          | 0              | 0              | 0              | 0              | 0 | 0              | 1          | 0          | 0              | 0              | 0              | 0              | 0 | 0.0%              | 1.6%       | 0.0%       | 0.0%           | 0.0%           | 0.0%           | 0.0%           | 0.0%           |
| tr F1S455 F1S455         | 1             | 0          | 0          | 0              | 0              | 0              | 0              | 0 | 1              | 0          | 0          | 0              | 0              | 0              | 0              | 0 | 4.6%              | 0.0%       | 0.0%       | 0.0%           | 0.0%           | 0.0%           | 0.0%           | 0.0%           |
| tr I3LGG8 I3LGG8         | 1             | 0          | 0          | 0              | 0              | 0              | 0              | 0 | 1              | 0          | 0          | 0              | 0              | 0              | 0              | 0 | 2.0%              | 0.0%       | 0.0%       | 0.0%           | 0.0%           | 0.0%           | 0.0%           | 0.0%           |
| tr F1RGB5 F1RGB5         | 1             | 0          | 0          | 0              | 0              | 0              | 0              | 0 | 1              | 0          | 0          | 0              | 0              | 0              | 0              | 0 | 0.6%              | 0.0%       | 0.0%       | 0.0%           | 0.0%           | 0.0%           | 0.0%           | 0.0%           |
| tr F1SH38 F1SH38         | 1             | 0          | 0          | 0              | 0              | 0              | 0              | 0 | 1              | 0          | 0          | 0              | 0              | 0              | 0              | 0 | 1.0%              | 0.0%       | 0.0%       | 0.0%           | 0.0%           | 0.0%           | 0.0%           | 0.0%           |
| tr I3LLC0 I3LLC0         | 0             | 1          | 0          | 0              | 0              | 0              | 0              | 0 | 0              | 1          | 0          | 0              | 0              | 0              | 0              | 0 | 0.0%              | 1.7%       | 0.0%       | 0.0%           | 0.0%           | 0.0%           | 0.0%           | 0.0%           |
| tr F1S6K3 F1S6K3         | 0             | 1          | 0          | 0              | 0              | 0              | 0              | 0 | 0              | 1          | 0          | 0              | 0              | 0              | 0              | 0 | 0.0%              | 2.7%       | 0.0%       | 0.0%           | 0.0%           | 0.0%           | 0.0%           | 0.0%           |
| tr F1SJ3 F1SJ3           | 1             | 0          | 0          | 0              | 0              | 0              | 0              | 0 | 1              | 0          | 0          | 0              | 0              | 0              | 0              | 0 | 3.0%              | 0.0%       | 0.0%       | 0.0%           | 0.0%           | 0.0%           | 0.0%           | 0.0%           |
| tr F2Z5J3 F2Z5J3         | 1             | 0          | 0          | 0              | 0              | 0              | 0              | 0 | 1              | 0          | 0          | 0              | 0              | 0              | 0              | 0 | 9.3%              | 0.0%       | 0.0%       | 0.0%           | 0.0%           | 0.0%           | 0.0%           | 0.0%           |
| tr F1RLE8 F1RLE8         | 1             | 0          | 0          | 0              | 0              | 0              | 0              | 0 | 1              | 0          | 0          | 0              | 0              | 0              | 0              | 0 | 3.1%              | 0.0%       | 0.0%       | 0.0%           | 0.0%           | 0.0%           | 0.0%           | 0.0%           |
| Reverse_tr I3LPJ0 I3LPJ0 | 1             | 0          | 0          | 0              | 0              | 0              | 0              | 0 | 1              | 0          | 0          | 0              | 0              | 0              | 0              | 0 | 6.1%              | 0.0%       | 0.0%       | 0.0%           | 0.0%           | 0.0%           | 0.0%           | 0.0%           |
| tr F1RFL7 F1RFL7         | 1             | 0          | 0          | 0              | 0              | 0              | 0              | 0 | 1              | 0          | 0          | 0              | 0              | 0              | 0              | 0 | 7.8%              | 0.0%       | 0.0%       | 0.0%           | 0.0%           | 0.0%           | 0.0%           | 0.0%           |
| tr F1S5F4 F1S5F4         | 1             | 0          | 0          | 0              | 0              | 0              | 0              | 0 | 1              | 0          | 0          | 0              | 0              | 0              | 0              | 0 | 8.7%              | 0.0%       | 0.0%       | 0.0%           | 0.0%           | 0.0%           | 0.0%           | 0.0%           |
| tr I3LH2 I3LH2           | 0             | 1          | 0          | 0              | 0              | 0              | 0              | 0 | 0              | 1          | 0          | 0              | 0              | 0              | 0              | 0 | 0.0%              | 16.5%      | 0.0%       | 0.0%           | 0.0%           | 0.0%           | 0.0%           | 0.0%           |
| tr I3LLY2 I3LLY2         | 1             | 0          | 0          | 0              | 0              | 0              | 0              | 0 | 1              | 0          | 0          | 0              | 0              | 0              | 0              | 0 | 3.6%              | 0.0%       | 0.0%       | 0.0%           | 0.0%           | 0.0%           | 0.0%           | 0.0%           |
| tr I3L971 I3L971         | 0             | 1          | 0          | 0              | 0              | 0              | 0              | 0 | 0              | 1          | 0          | 0              | 0              | 0              | 0              | 0 | 0.0%              | 8.0%       | 0.0%       | 0.0%           | 0.0%           | 0.0%           | 0.0%           | 0.0%           |
| tr F1RXC7 F1RXC7         | 1             | 0          | 0          | 0              | 0              | 0              | 0              | 0 | 1              | 0          | 0          | 0              | 0              | 0              | 0              | 0 | 1.8%              | 0.0%       | 0.0%       | 0.0%           | 0.0%           | 0.0%           | 0.0%           | 0.0%           |
| tr I3LQ1 I3LQ1           | 0             | 1          | 0          | 0              | 0              | 0              | 0              | 0 | 0              | 1          | 0          | 0              | 0              | 0              | 0              | 0 | 0.0%              | 2.0%       | 0.0%       | 0.0%           | 0.0%           | 0.0%           | 0.0%           | 0.0%           |
| O19071                   | 0             | 1          | 0          | 0              | 0              | 0              | 0              | 0 | 0              | 1          | 0          | 0              | 0              | 0              | 0              | 0 | 0.0%              | 4.5%       | 0.0%       | 0.0%           | 0.0%           | 0.0%           | 0.0%           | 0.0%           |
| tr F1RQG8 F1RQG8         | 1             | 0          | 0          | 0              | 0              | 0              | 0              | 0 | 1              | 0          | 0          | 0              | 0              | 0              | 0              | 0 | 2.0%              | 0.0%       | 0.0%       | 0.0%           | 0.0%           | 0.0%           | 0.0%           | 0.0%           |
| tr I3LLX2 I3LLX2         | 0             | 1          | 0          | 0              | 0              | 0              | 0              | 0 | 0              | 1          | 0          | 0              | 0              | 0              | 0              | 0 | 0.0%              | 0.7%       | 0.0%       | 0.0%           | 0.0%           | 0.0%           | 0.0%           | 0.0%           |
| tr F1SFG2 F1SFG2         | 1             | 0          | 0          | 0              | 0              | 0              | 0              | 0 | 1              | 0          | 0          | 0              | 0              | 0              | 0              | 0 | 2.3%              | 0.0%       | 0.0%       | 0.0%           | 0.0%           | 0.0%           | 0.0%           | 0.0%           |
| tr I3L9Z3 I3L9Z3         | 1             | 0          | 0          | 0              | 0              | 0              | 0              | 0 | 1              | 0          | 0          | 0              | 0              | 0              | 0              | 0 | 2.6%              | 0.0%       | 0.0%       | 0.0%           | 0.0%           | 0.0%           | 0.0%           | 0.0%           |
| Q5H7C0                   | 0             | 1          | 0          | 0              | 0              | 0              | 0              | 0 | 0              | 1          | 0          | 0              | 0              | 0              | 0              | 0 | 0.0%              | 3.2%       | 0.0%       | 0.0%           | 0.0%           | 0.0%           | 0.0%           | 0.0%           |
| Reverse_tr I3L9T1 I3L9T1 | 1             | 0          | 0          | 0              | 0              | 0              | 0              | 0 | 1              | 0          | 0          | 0              | 0              | 0              | 0              | 0 | 0.5%              | 0.0%       | 0.0%       | 0.0%           | 0.0%           | 0.0%           | 0.0%           | 0.0%           |
| tr I3L8H1 I3L8H1         | 1             | 0          | 0          | 0              | 0              | 0              | 0              | 0 | 1              | 0          | 0          | 0              | 0              | 0              | 0              | 0 | 18.9%             | 0.0%       | 0.0%       | 0.0%           | 0.0%           | 0.0%           | 0.0%           | 0.0%           |
| tr I3LUQ0 I3LUQ0         | 0             | 1          | 0          | 0              | 0              | 0              | 0              | 0 | 0              | 1          | 0          | 0              | 0              | 0              | 0              | 0 | 0.0%              | 9.9%       | 0.0%       | 0.0%           | 0.0%           | 0.0%           | 0.0%           | 0.0%           |
| tr F1RK19 F1RK19         | 1             | 0          | 0          | 0              | 0              | 0              | 0              | 0 | 1              | 0          | 0          | 0              | 0              | 0              | 0              | 0 | 2.3%              | 0.0%       | 0.0%       | 0.0%           | 0.0%           | 0.0%           | 0.0%           | 0.0%           |
| tr F1SHQ3 F1SHQ3         | 1             | 0          | 0          | 0              | 0              | 0              | 0              | 0 | 1              | 0          | 0          | 0              | 0              | 0              | 0              | 0 | 0.8%              | 0.0%       | 0.0%       | 0.0%           | 0.0%           | 0.0%           | 0.0%           | 0.0%           |
| Reverse_tr F1SHM1 F1SHM1 | 1             | 0          | 0          | 0              | 0              | 0              | 0              | 0 | 1              | 0          | 0          | 0              | 0              | 0              | 0              | 0 | 3.7%              | 0.0%       | 0.0%       | 0.0%           | 0.0%           | 0.0%           | 0.0%           | 0.0%           |
| tr I3LQX0 I3LQX0         | 1             | 0          | 0          | 0              | 0              | 0              | 0              | 0 | 1              | 0          | 0          | 0              | 0              | 0              | 0              | 0 | 3.9%              | 0.0%       | 0.0%       | 0.0%           | 0.0%           | 0.0%           | 0.0%           | 0.0%           |
| tr K7GN41 K7GN41         | 1             | 0          | 0          | 0              | 0              | 0              | 0              | 0 | 1              | 0          | 0          | 0              | 0              | 0              | 0              | 0 | 10.9%             | 0.0%       | 0.0%       | 0.0%           | 0.0%           | 0.0%           | 0.0%           | 0.0%           |
| tr I3LIE2 I3LIE2         | 1             | 0          | 0          | 0              | 0              | 0              | 0              | 0 | 1              | 0          | 0          | 0              | 0              | 0              | 0              | 0 | 62.0%             | 0.0%       | 0.0%       | 0.0%           | 0.0%           | 0.0%           | 0.0%           | 0.0%           |
| tr K7GRS0 K7GRS0         | 1             | 0          | 0          | 0              | 0              | 0              | 0              | 0 | 1              | 0          | 0          | 0              | 0              | 0              | 0              | 0 | 5.2%              | 0.0%       | 0.0%       | 0.0%           | 0.0%           | 0.0%           | 0.0%           | 0.0%           |
| tr F1RHU1 F1RHU1         | 1             | 0          | 0          | 0              | 0              | 0              | 0              | 0 | 1              | 0          | 0          | 0              | 0              | 0              | 0              | 0 | 3.6%              | 0.0%       | 0.0%       | 0.0%           | 0.0%           | 0.0%           | 0.0%           | 0.0%           |
| tr F1RQT6 F1RQT6         | 1             | 0          | 0          | 0              | 0              | 0              | 0              | 0 | 1              | 0          | 0          | 0              | 0              | 0              | 0              | 0 | 1.7%              | 0.0%       | 0.0%       | 0.0%           | 0.0%           | 0.0%           | 0.0%           | 0.0%           |
| tr A5D9K9 A5D9K9         | 1             | 0          | 0          | 0              | 0              | 0              | 0              | 0 | 1              | 0          | 0          | 0              | 0              | 0              | 0              | 0 | 8.0%              | 0.0%       | 0.0%       | 0.0%           | 0.0%           | 0.0%           | 0.0%           | 0.0%           |
| tr F1SA03 F1SA03         | 1             | 0          | 0          | 0              | 0              | 0              | 0              | 0 | 1              | 0          | 0          | 0              | 0              | 0              | 0              | 0 | 2.2%              | 0.0%       | 0.0%       | 0.0%           | 0.0%           | 0.0%           | 0.0%           | 0.0%           |
| tr K7GS73 K7GS73         | 1             | 0          | 0          | 0              | 0              | 0              | 0              | 0 | 1              | 0          | 0          | 0              | 0              | 0              | 0              | 0 | 1.3%              | 0.0%       | 0.0%       | 0.0%           | 0.0%           | 0.0%           | 0.0%           | 0.0%           |
| tr F1RR03 F1RR03         | 0             | 1          | 0          | 0              | 0              | 0              | 0              | 0 | 0              | 1          | 0          | 0              | 0              | 0              | 0              | 0 | 0.0%              | 1.8%       | 0.0%       | 0.0%           | 0.0%           | 0.0%           | 0.0%           | 0.0%           |
| tr F1SE30 F1SE30         | 0             | 1          | 0          | 0              | 0              | 0              | 0              | 0 | 0              | 1          | 0          | 0              | 0              | 0              | 0              | 0 | 0.0%              | 0.6%       | 0.0%       | 0.0%           | 0.0%           | 0.0%           | 0.0%           | 0.0%           |
| Q767L9                   | 1             | 0          | 0          | 0              | 0              | 0              | 0              | 0 | 1              | 0          | 0          | 0              | 0              | 0              | 0              | 0 | 7.6%              | 0.0%       | 0.0%       | 0.0%           | 0.0%           | 0.0%           | 0.0%           | 0.0%           |
| tr I3L614 I3L614         | 1             | 0          | 0          | 0              | 0              | 0              | 0              | 0 | 1              | 0          | 0          | 0              | 0              | 0              | 0              | 0 | 8.3%              | 0.0%       | 0.0%       | 0.0%           | 0.0%           | 0.0%           | 0.0%           | 0.0%           |
| tr F1SJX2 F1SJX2         | 0             | 1          | 0          | 0              | 0              | 0              | 0              | 0 | 0              | 1          | 0          | 0              | 0              | 0              | 0              | 0 | 0.0%              | 5.1%       | 0.0%       | 0.0%           | 0.0%           | 0.0%           | 0.0%           | 0.0%           |
| tr F1RUP6 F1RUP6         | 1             | 0          | 0          | 0              | 0              | 0              | 0              | 0 | 1              | 0          | 0          | 0              | 0              | 0              | 0              | 0 | 7.8%              | 0.0%       | 0.0%       | 0.0%           | 0.0%           | 0.0%           | 0.0%           | 0.0%           |
| tr I3L9T3 I3L9T3         | 1             | 0          | 0          | 0              | 0              | 0              | 0              | 0 | 1              | 0          | 0          | 0              | 0              | 0              | 0              | 0 | 9.7%              | 0.0%       | 0.0%       | 0.0%           | 0.0%           | 0.0%           | 0.0%           | 0.0%           |
| tr F1SLA1 F1SLA1         | 1             | 0          | 0          | 0              | 0              | 0              | 0              | 0 | 1              | 0          | 0          | 0              | 0              | 0              | 0              | 0 | 9.7%              | 0.0%       | 0.0%       | 0.0%           | 0.0%           | 0.0%           | 0.0%           | 0.0%           |
| tr I3L750 I3L750         | 1             | 0          | 0          | 0              | 0              | 0              | 0              | 0 | 1              | 0          | 0          | 0              | 0              | 0              | 0              | 0 | 18.5%             | 0.0%       | 0.0%       | 0.0%           | 0.0%           | 0.0%           | 0.0%           | 0.0%           |
| tr F1SLG3 F1SLG3         | 1             | 0          | 0          | 0              | 0              | 0              | 0              | 0 | 1              | 0          | 0          | 0              | 0              | 0              | 0              | 0 | 5.3%              | 0.0%       | 0.0%       | 0.0%           | 0.0%           | 0.0%           | 0.0%           | 0.0%           |
| P32394                   | 1             | 0          | 0          | 0              | 0              | 0              | 0              | 0 | 1              | 0          | 0          | 0              | 0              | 0              | 0              | 0 | 4.5%              | 0.0%       | 0.0%       | 0.0%           | 0.0%           | 0.0%           | 0.0%           | 0.0%           |
| tr F1RZC4 F1RZC4         | 0             | 1          | 0          | 0              | 0              | 0              | 0              | 0 | 0              | 1          | 0          | 0              | 0              | 0              | 0              | 0 | 0.0%              | 10.2%      | 0.0%       | 0.0%           | 0.0%           | 0.0%           | 0.0%           | 0.0%           |
| tr I3LKN4 I3LKN4         | 1             | 0          | 0          | 0              | 0              | 0              | 0              | 0 | 1              | 0          | 0          | 0              | 0              | 0              | 0              | 0 | 15.6%             | 0.0%       | 0.0%       | 0.0%           | 0.0%           | 0.0%           | 0.0%           | 0.0%           |
| tr F1RPM5 F1RPM5         | 1             | 0          | 0          | 0              | 0              | 0              | 0              | 0 | 1              | 0          | 0          | 0              | 0              | 0              | 0              | 0 | 3.3%              | 0.0%       | 0.0%       | 0.0%           | 0.0%           | 0.0%           | 0.0%           | 0.0%           |
| tr I3LC39 I3LC39         | 1             | 0          | 0          | 0              | 0              | 0              | 0              | 0 | 1              | 0          | 0          | 0              | 0              | 0              | 0              | 0 | 2.0%              | 0.0%       | 0.0%       | 0.0%           | 0.0%           | 0.0%           | 0.0%           | 0.0%           |
| tr K7GPP2 K7GPP2         | 1             | 0          | 0          | 0              | 0              | 0              | 0              | 0 | 1              | 0          | 0          | 0              | 0              | 0              | 0              | 0 | 9.9%              | 0.0%       | 0.0%       | 0.0%           | 0.0%           | 0.0%           | 0.0%           | 0.0%           |
| A1YI21                   | 1             | 0          | 0          | 0              |                |                |                |   |                |            |            |                |                |                |                |   |                   |            |            |                |                |                |                |                |

| Sample#                  | Peptide Count |            |            |                |                |                |                | Spectral Count |            |            |                |                |                |                | Sequence Coverage |            |            |                |                |                |                |      |
|--------------------------|---------------|------------|------------|----------------|----------------|----------------|----------------|----------------|------------|------------|----------------|----------------|----------------|----------------|-------------------|------------|------------|----------------|----------------|----------------|----------------|------|
|                          | Whole Cell    | Whole Cell | Whole Cell | Cilia Fraction | Cilia Fraction | Cilia Fraction | Cilia Fraction | Whole Cell     | Whole Cell | Whole Cell | Cilia Fraction | Cilia Fraction | Cilia Fraction | Cilia Fraction | Whole Cell        | Whole Cell | Whole Cell | Cilia Fraction | Cilia Fraction | Cilia Fraction | Cilia Fraction |      |
|                          | 1             | 2          | 6          | 4              | 3              | 5              | 7              | 1              | 2          | 6          | 4              | 3              | 5              | 7              | 1                 | 2          | 6          | 4              | 3              | 5              | 7              | 8    |
| Accession                |               |            |            |                |                |                |                |                |            |            |                |                |                |                |                   |            |            |                |                |                |                |      |
| tr F1SIW3 F1SIW3         | 1             | 0          | 0          | 0              | 0              | 0              | 0              | 0              | 1          | 0          | 0              | 0              | 0              | 0              | 0                 | 1.6%       | 0.0%       | 0.0%           | 0.0%           | 0.0%           | 0.0%           | 0.0% |
| tr I3LI80 I3LI80         | 1             | 0          | 0          | 0              | 0              | 0              | 0              | 0              | 1          | 0          | 0              | 0              | 0              | 0              | 0                 | 30.9%      | 0.0%       | 0.0%           | 0.0%           | 0.0%           | 0.0%           | 0.0% |
| tr I3LF11 I3LF11         | 0             | 1          | 0          | 0              | 0              | 0              | 0              | 0              | 0          | 1          | 0              | 0              | 0              | 0              | 0                 | 0.0%       | 0.4%       | 0.0%           | 0.0%           | 0.0%           | 0.0%           | 0.0% |
| tr I3LJK0 I3LJK0         | 1             | 0          | 0          | 0              | 0              | 0              | 0              | 0              | 1          | 0          | 0              | 0              | 0              | 0              | 0                 | 22.6%      | 0.0%       | 0.0%           | 0.0%           | 0.0%           | 0.0%           | 0.0% |
| tr F2Z5N4 F2Z5N4         | 1             | 0          | 0          | 0              | 0              | 0              | 0              | 0              | 1          | 0          | 0              | 0              | 0              | 0              | 0                 | 2.6%       | 0.0%       | 0.0%           | 0.0%           | 0.0%           | 0.0%           | 0.0% |
| Q29333                   | 0             | 1          | 0          | 0              | 0              | 0              | 0              | 0              | 0          | 1          | 0              | 0              | 0              | 0              | 0                 | 0.0%       | 16.7%      | 0.0%           | 0.0%           | 0.0%           | 0.0%           | 0.0% |
| tr F1RLG2 F1RLG2         | 1             | 0          | 0          | 0              | 0              | 0              | 0              | 0              | 1          | 0          | 0              | 0              | 0              | 0              | 0                 | 6.8%       | 0.0%       | 0.0%           | 0.0%           | 0.0%           | 0.0%           | 0.0% |
| tr I3LNL4 I3LNL4         | 1             | 0          | 0          | 0              | 0              | 0              | 0              | 0              | 1          | 0          | 0              | 0              | 0              | 0              | 0                 | 24.7%      | 0.0%       | 0.0%           | 0.0%           | 0.0%           | 0.0%           | 0.0% |
| Reverse_tr I3LI00 I3LI00 | 0             | 1          | 0          | 0              | 0              | 0              | 0              | 0              | 0          | 1          | 0              | 0              | 0              | 0              | 0                 | 0.0%       | 2.7%       | 0.0%           | 0.0%           | 0.0%           | 0.0%           | 0.0% |
| tr F1RQN5 F1RQN5         | 1             | 0          | 0          | 0              | 0              | 0              | 0              | 0              | 1          | 0          | 0              | 0              | 0              | 0              | 0                 | 3.7%       | 0.0%       | 0.0%           | 0.0%           | 0.0%           | 0.0%           | 0.0% |
| tr F1RFL9 F1RFL9         | 1             | 0          | 0          | 0              | 0              | 0              | 0              | 0              | 1          | 0          | 0              | 0              | 0              | 0              | 0                 | 1.5%       | 0.0%       | 0.0%           | 0.0%           | 0.0%           | 0.0%           | 0.0% |
| tr I3LBY5 I3LBY5         | 1             | 0          | 0          | 0              | 0              | 0              | 0              | 0              | 1          | 0          | 0              | 0              | 0              | 0              | 0                 | 6.4%       | 0.0%       | 0.0%           | 0.0%           | 0.0%           | 0.0%           | 0.0% |
| tr F1RRH9 F1RRH9         | 1             | 0          | 0          | 0              | 0              | 0              | 0              | 0              | 1          | 0          | 0              | 0              | 0              | 0              | 0                 | 4.0%       | 0.0%       | 0.0%           | 0.0%           | 0.0%           | 0.0%           | 0.0% |
| Reverse_sp O02696 PI3R5  | 1             | 0          | 0          | 0              | 0              | 0              | 0              | 0              | 1          | 0          | 0              | 0              | 0              | 0              | 0                 | 2.4%       | 0.0%       | 0.0%           | 0.0%           | 0.0%           | 0.0%           | 0.0% |
| tr F1S444 F1S444         | 0             | 1          | 0          | 0              | 0              | 0              | 0              | 0              | 0          | 1          | 0              | 0              | 0              | 0              | 0                 | 0.0%       | 3.5%       | 0.0%           | 0.0%           | 0.0%           | 0.0%           | 0.0% |
| tr F1SE04 F1SE04         | 0             | 1          | 0          | 0              | 0              | 0              | 0              | 0              | 0          | 1          | 0              | 0              | 0              | 0              | 0                 | 0.0%       | 2.4%       | 0.0%           | 0.0%           | 0.0%           | 0.0%           | 0.0% |
| tr I3LVP6 I3LVP6         | 1             | 0          | 0          | 0              | 0              | 0              | 0              | 0              | 1          | 0          | 0              | 0              | 0              | 0              | 0                 | 1.7%       | 0.0%       | 0.0%           | 0.0%           | 0.0%           | 0.0%           | 0.0% |
| tr I3LGM0 I3LGM0         | 1             | 0          | 0          | 0              | 0              | 0              | 0              | 0              | 1          | 0          | 0              | 0              | 0              | 0              | 0                 | 13.3%      | 0.0%       | 0.0%           | 0.0%           | 0.0%           | 0.0%           | 0.0% |
| tr F1S513 F1S513         | 0             | 1          | 0          | 0              | 0              | 0              | 0              | 0              | 0          | 1          | 0              | 0              | 0              | 0              | 0                 | 0.0%       | 1.5%       | 0.0%           | 0.0%           | 0.0%           | 0.0%           | 0.0% |
| tr I3LFC0 I3LFC0         | 1             | 0          | 0          | 0              | 0              | 0              | 0              | 0              | 1          | 0          | 0              | 0              | 0              | 0              | 0                 | 23.1%      | 0.0%       | 0.0%           | 0.0%           | 0.0%           | 0.0%           | 0.0% |
| tr F1S604 F1S604         | 0             | 1          | 0          | 0              | 0              | 0              | 0              | 0              | 0          | 1          | 0              | 0              | 0              | 0              | 0                 | 0.0%       | 8.0%       | 0.0%           | 0.0%           | 0.0%           | 0.0%           | 0.0% |
| tr I3LR60 I3LR60         | 1             | 0          | 0          | 0              | 0              | 0              | 0              | 0              | 1          | 0          | 0              | 0              | 0              | 0              | 0                 | 6.7%       | 0.0%       | 0.0%           | 0.0%           | 0.0%           | 0.0%           | 0.0% |
| tr K7GMK7 K7GMK7         | 1             | 0          | 0          | 0              | 0              | 0              | 0              | 0              | 1          | 0          | 0              | 0              | 0              | 0              | 0                 | 8.6%       | 0.0%       | 0.0%           | 0.0%           | 0.0%           | 0.0%           | 0.0% |
| tr F1SAI0 F1SAI0         | 1             | 0          | 0          | 0              | 0              | 0              | 0              | 0              | 1          | 0          | 0              | 0              | 0              | 0              | 0                 | 1.7%       | 0.0%       | 0.0%           | 0.0%           | 0.0%           | 0.0%           | 0.0% |
| tr F1RMF7 F1RMF7         | 1             | 0          | 0          | 0              | 0              | 0              | 0              | 0              | 1          | 0          | 0              | 0              | 0              | 0              | 0                 | 5.1%       | 0.0%       | 0.0%           | 0.0%           | 0.0%           | 0.0%           | 0.0% |
| tr I3LQR4 I3LQR4         | 1             | 0          | 0          | 0              | 0              | 0              | 0              | 0              | 1          | 0          | 0              | 0              | 0              | 0              | 0                 | 6.2%       | 0.0%       | 0.0%           | 0.0%           | 0.0%           | 0.0%           | 0.0% |
| tr F1S0U0 F1S0U0         | 0             | 1          | 0          | 0              | 0              | 0              | 0              | 0              | 0          | 1          | 0              | 0              | 0              | 0              | 0                 | 0.0%       | 1.4%       | 0.0%           | 0.0%           | 0.0%           | 0.0%           | 0.0% |
| Reverse_tr I3LB00 I3LB00 | 0             | 1          | 0          | 0              | 0              | 0              | 0              | 0              | 0          | 1          | 0              | 0              | 0              | 0              | 0                 | 0.0%       | 9.5%       | 0.0%           | 0.0%           | 0.0%           | 0.0%           | 0.0% |
| tr F1SMQ7 F1SMQ7         | 0             | 1          | 0          | 0              | 0              | 0              | 0              | 0              | 0          | 1          | 0              | 0              | 0              | 0              | 0                 | 0.0%       | 2.1%       | 0.0%           | 0.0%           | 0.0%           | 0.0%           | 0.0% |
| tr F1RUH9 F1RUH9         | 1             | 0          | 0          | 0              | 0              | 0              | 0              | 0              | 1          | 0          | 0              | 0              | 0              | 0              | 0                 | 4.6%       | 0.0%       | 0.0%           | 0.0%           | 0.0%           | 0.0%           | 0.0% |
| tr I3LJA0 I3LJA0         | 0             | 1          | 0          | 0              | 0              | 0              | 0              | 0              | 0          | 1          | 0              | 0              | 0              | 0              | 0                 | 0.0%       | 2.6%       | 0.0%           | 0.0%           | 0.0%           | 0.0%           | 0.0% |
| tr F1SRI4 F1SRI4         | 0             | 1          | 0          | 0              | 0              | 0              | 0              | 0              | 0          | 1          | 0              | 0              | 0              | 0              | 0                 | 0.0%       | 0.6%       | 0.0%           | 0.0%           | 0.0%           | 0.0%           | 0.0% |
| tr F1S141 F1S141         | 0             | 1          | 0          | 0              | 0              | 0              | 0              | 0              | 0          | 1          | 0              | 0              | 0              | 0              | 0                 | 0.0%       | 4.9%       | 0.0%           | 0.0%           | 0.0%           | 0.0%           | 0.0% |
| tr F1RX78 F1RX78         | 1             | 0          | 0          | 0              | 0              | 0              | 0              | 0              | 1          | 0          | 0              | 0              | 0              | 0              | 0                 | 6.4%       | 0.0%       | 0.0%           | 0.0%           | 0.0%           | 0.0%           | 0.0% |
| tr I3L734 I3L734         | 0             | 1          | 0          | 0              | 0              | 0              | 0              | 0              | 0          | 1          | 0              | 0              | 0              | 0              | 0                 | 0.0%       | 5.0%       | 0.0%           | 0.0%           | 0.0%           | 0.0%           | 0.0% |
| tr F1RH83 F1RH83         | 1             | 0          | 0          | 0              | 0              | 0              | 0              | 0              | 1          | 0          | 0              | 0              | 0              | 0              | 0                 | 4.5%       | 0.0%       | 0.0%           | 0.0%           | 0.0%           | 0.0%           | 0.0% |
| tr F1SB84 F1SB84         | 1             | 0          | 0          | 0              | 0              | 0              | 0              | 0              | 1          | 0          | 0              | 0              | 0              | 0              | 0                 | 5.7%       | 0.0%       | 0.0%           | 0.0%           | 0.0%           | 0.0%           | 0.0% |
| Reverse_tr F1SV12 F1SV12 | 1             | 0          | 0          | 0              | 0              | 0              | 0              | 0              | 1          | 0          | 0              | 0              | 0              | 0              | 0                 | 2.0%       | 0.0%       | 0.0%           | 0.0%           | 0.0%           | 0.0%           | 0.0% |
| tr F1SGQ1 F1SGQ1         | 1             | 0          | 0          | 0              | 0              | 0              | 0              | 0              | 1          | 0          | 0              | 0              | 0              | 0              | 0                 | 2.4%       | 0.0%       | 0.0%           | 0.0%           | 0.0%           | 0.0%           | 0.0% |
| Reverse_tr F1RWG7 F1RWG7 | 1             | 0          | 0          | 0              | 0              | 0              | 0              | 0              | 1          | 0          | 0              | 0              | 0              | 0              | 0                 | 9.1%       | 0.0%       | 0.0%           | 0.0%           | 0.0%           | 0.0%           | 0.0% |
| tr I3LKQ5 I3LKQ5         | 1             | 0          | 0          | 0              | 0              | 0              | 0              | 0              | 1          | 0          | 0              | 0              | 0              | 0              | 0                 | 7.2%       | 0.0%       | 0.0%           | 0.0%           | 0.0%           | 0.0%           | 0.0% |
| tr F1RU87 F1RU87         | 1             | 0          | 0          | 0              | 0              | 0              | 0              | 0              | 1          | 0          | 0              | 0              | 0              | 0              | 0                 | 3.4%       | 0.0%       | 0.0%           | 0.0%           | 0.0%           | 0.0%           | 0.0% |
| Reverse_tr F1RYR0 F1RYR0 | 1             | 0          | 0          | 0              | 0              | 0              | 0              | 0              | 1          | 0          | 0              | 0              | 0              | 0              | 0                 | 2.9%       | 0.0%       | 0.0%           | 0.0%           | 0.0%           | 0.0%           | 0.0% |
| tr I3L9D4 I3L9D4         | 1             | 0          | 0          | 0              | 0              | 0              | 0              | 0              | 1          | 0          | 0              | 0              | 0              | 0              | 0                 | 13.1%      | 0.0%       | 0.0%           | 0.0%           | 0.0%           | 0.0%           | 0.0% |
| tr F1S4G2 F1S4G2         | 1             | 0          | 0          | 0              | 0              | 0              | 0              | 0              | 1          | 0          | 0              | 0              | 0              | 0              | 0                 | 6.3%       | 0.0%       | 0.0%           | 0.0%           | 0.0%           | 0.0%           | 0.0% |
| tr I3LSP7 I3LSP7         | 1             | 0          | 0          | 0              | 0              | 0              | 0              | 0              | 1          | 0          | 0              | 0              | 0              | 0              | 0                 | 12.5%      | 0.0%       | 0.0%           | 0.0%           | 0.0%           | 0.0%           | 0.0% |
| tr F1SPF7 F1SPF7         | 1             | 0          | 0          | 0              | 0              | 0              | 0              | 0              | 1          | 0          | 0              | 0              | 0              | 0              | 0                 | 4.3%       | 0.0%       | 0.0%           | 0.0%           | 0.0%           | 0.0%           | 0.0% |
| Reverse_tr I3LKJ5 I3LKJ5 | 1             | 0          | 0          | 0              | 0              | 0              | 0              | 0              | 1          | 0          | 0              | 0              | 0              | 0              | 0                 | 2.5%       | 0.0%       | 0.0%           | 0.0%           | 0.0%           | 0.0%           | 0.0% |
| tr F1RUZ4 F1RUZ4         | 1             | 0          | 0          | 0              | 0              | 0              | 0              | 0              | 1          | 0          | 0              | 0              | 0              | 0              | 0                 | 3.2%       | 0.0%       | 0.0%           | 0.0%           | 0.0%           | 0.0%           | 0.0% |
| tr I3LQK1 I3LQK1         | 1             | 0          | 0          | 0              | 0              | 0              | 0              | 0              | 1          | 0          | 0              | 0              | 0              | 0              | 0                 | 15.6%      | 0.0%       | 0.0%           | 0.0%           | 0.0%           | 0.0%           | 0.0% |
| tr Q767M2 Q767M2         | 1             | 0          | 0          | 0              | 0              | 0              | 0              | 0              | 1          | 0          | 0              | 0              | 0              | 0              | 0                 | 4.5%       | 0.0%       | 0.0%           | 0.0%           | 0.0%           | 0.0%           | 0.0% |
| tr F1SMR7 F1SMR7         | 1             | 0          | 0          | 0              | 0              | 0              | 0              | 0              | 1          | 0          | 0              | 0              | 0              | 0              | 0                 | 8.7%       | 0.0%       | 0.0%           | 0.0%           | 0.0%           | 0.0%           | 0.0% |
| tr F1RNY8 F1RNY8         | 1             | 0          | 0          | 0              | 0              | 0              | 0              | 0              | 1          | 0          | 0              | 0              | 0              | 0              | 0                 | 5.0%       | 0.0%       | 0.0%           | 0.0%           | 0.0%           | 0.0%           | 0.0% |
| Reverse_tr K7GSB6 K7GSB6 | 1             | 0          | 0          | 0              | 0              | 0              | 0              | 0              | 1          | 0          | 0              | 0              | 0              | 0              | 0                 | 4.4%       | 0.0%       | 0.0%           | 0.0%           | 0.0%           | 0.0%           | 0.0% |
| tr I3LSW2 I3LSW2         | 1             | 0          | 0          | 0              | 0              | 0              | 0              | 0              | 1          | 0          | 0              | 0              | 0              | 0              | 0                 | 7.9%       | 0.0%       | 0.0%           | 0.0%           | 0.0%           | 0.0%           | 0.0% |
| tr K7GKQ5 K7GKQ5         | 1             | 0          | 0          | 0              | 0              | 0              | 0              | 0              | 1          | 0          | 0              | 0              | 0              | 0              | 0                 | 3.5%       | 0.0%       | 0.0%           | 0.0%           | 0.0%           | 0.0%           | 0.0% |
| Q29026                   | 1             | 0          | 0          | 0              | 0              | 0              | 0              | 0              | 1          | 0          | 0              | 0              | 0              | 0              | 0                 | 12.9%      | 0.0%       | 0.0%           | 0.0%           | 0.0%           | 0.0%           | 0.0% |
| Q29036                   | 1             | 0          | 0          | 0              | 0              | 0              | 0              | 0              | 1          | 0          | 0              | 0              | 0              | 0              | 0                 | 10.6%      | 0.0%       | 0.0%           | 0.0%           | 0.0%           | 0.0%           | 0.0% |
| tr I3LNF6 I3LNF6         | 1             | 0          | 0          | 0              | 0              | 0              | 0              | 0              | 1          | 0          | 0              | 0              | 0              | 0              | 0                 | 1.5%       | 0.0%       | 0.0%           | 0.0%           | 0.0%           | 0.0%           | 0.0% |
| tr F1SMA9 F1SMA9         | 1             | 0          | 0          | 0              | 0              | 0              | 0              | 0              | 1          | 0          | 0              | 0              | 0              | 0              | 0                 | 6.3%       | 0.0%       | 0.0%           | 0.0%           | 0.0%           | 0.0%           | 0.0% |
| tr K7GRJ6 K7GRJ6         | 1             | 0          | 0          | 0              | 0              | 0              | 0              | 0              | 1          | 0          | 0              | 0              | 0              | 0              | 0                 | 14.4%      | 0.0%       | 0.0%           | 0.0%           | 0.0%           | 0.0%           | 0.0% |
| Q29081                   | 1             | 0          | 0          | 0              | 0              | 0              | 0              | 0              | 1          | 0          | 0              | 0              | 0              | 0              | 0                 | 14.6%      | 0.0%       | 0.0%           | 0.0%           | 0.0%           | 0.0%           | 0.0% |
| tr I3LP29 I3LP29         | 0             | 1          | 0          | 0              | 0              | 0              | 0              | 0              | 0          | 1          | 0              | 0              | 0              | 0              | 0                 | 0.0%       | 1.5%       | 0.0%           | 0.0%           | 0.0%           | 0.0%           | 0.0% |
| tr I3LJR5 I3LJR5         | 1             | 0          | 0          | 0              | 0              | 0              | 0              | 0              | 1          | 0          | 0              | 0              | 0              | 0              | 0                 | 5.0%       | 0.0%       | 0.0%           | 0.0%           | 0.0%           | 0.0%           | 0.0% |
| tr F1RVI4 F1RVI4         | 0             | 1          | 0          | 0              | 0              | 0              | 0              | 0              | 0          | 1          | 0              | 0              | 0              | 0              | 0                 | 0.0%       | 2.8%       | 0.0%           | 0.0%           | 0.0%           | 0.0%           | 0.0% |
| tr I3LPL2 I3LPL2         | 1             | 0          | 0          | 0              | 0              | 0              | 0              | 0              | 1          | 0          | 0              | 0              | 0              | 0              | 0                 | 4.0%       | 0.0%       | 0.0%           | 0.0%           | 0.0%           | 0.0%           | 0.0% |
| tr F1SHU8 F1SHU8         | 1             | 0          | 0          | 0              | 0              | 0              | 0              | 0              | 1          | 0          | 0              | 0              | 0              | 0              | 0                 | 0.8%       | 0.0%       | 0.0%           | 0.0%           | 0.0%           | 0.0%           | 0.0% |
| tr F1RZA1 F1RZA1         | 1             | 0          | 0          | 0              | 0              | 0              | 0              | 0              | 1          | 0          | 0              | 0              | 0              | 0              | 0                 | 4.3%       | 0.0%       | 0.0%           | 0.0%           | 0.0%           | 0.0%           | 0.0% |
| tr K7GQK7 K7GQK7         | 1             | 0          | 0          | 0              | 0              | 0              | 0              | 0              | 1          | 0          | 0              | 0              | 0              | 0              | 0                 | 25.0%      | 0.0%       | 0.0%           | 0.0%           | 0.0            |                |      |

| Sample#                  | Peptide Count |            |            |                |                |                |                | Spectral Count |            |            |            |                |                |                | Sequence Coverage |                |            |            |            |                |                |                |                |                |
|--------------------------|---------------|------------|------------|----------------|----------------|----------------|----------------|----------------|------------|------------|------------|----------------|----------------|----------------|-------------------|----------------|------------|------------|------------|----------------|----------------|----------------|----------------|----------------|
|                          | Whole Cell    | Whole Cell | Whole Cell | Cilia Fraction | Whole Cell | Whole Cell | Whole Cell | Cilia Fraction | Cilia Fraction | Cilia Fraction | Cilia Fraction    | Cilia Fraction | Whole Cell | Whole Cell | Whole Cell | Cilia Fraction |
|                          | 1             | 2          | 6          | 4              | 3              | 5              | 7              | 8              | 1          | 2          | 6          | 4              | 3              | 5              | 7                 | 8              | 1          | 2          | 6          | 4              | 3              | 5              | 7              | 8              |
| Accession                |               |            |            |                |                |                |                |                |            |            |            |                |                |                |                   |                |            |            |            |                |                |                |                |                |
| tr I3LMP8 I3LMP8         | 1             | 0          | 0          | 0              | 0              | 0              | 0              | 0              | 1          | 0          | 0          | 0              | 0              | 0              | 0                 | 0              | 6.2%       | 0.0%       | 0.0%       | 0.0%           | 0.0%           | 0.0%           | 0.0%           | 0.0%           |
| Reverse_tr F1S146 F1S146 | 1             | 0          | 0          | 0              | 0              | 0              | 0              | 0              | 1          | 0          | 0          | 0              | 0              | 0              | 0                 | 0              | 0.4%       | 0.0%       | 0.0%       | 0.0%           | 0.0%           | 0.0%           | 0.0%           | 0.0%           |
| tr I3LDD4 I3LDD4         | 0             | 1          | 0          | 0              | 0              | 0              | 0              | 0              | 0          | 1          | 0          | 0              | 0              | 0              | 0                 | 0              | 0.0%       | 3.4%       | 0.0%       | 0.0%           | 0.0%           | 0.0%           | 0.0%           | 0.0%           |
| tr F1SK82 F1SK82         | 0             | 1          | 0          | 0              | 0              | 0              | 0              | 0              | 0          | 1          | 0          | 0              | 0              | 0              | 0                 | 0              | 0.0%       | 6.2%       | 0.0%       | 0.0%           | 0.0%           | 0.0%           | 0.0%           | 0.0%           |
| tr I3LK49 I3LK49         | 0             | 1          | 0          | 0              | 0              | 0              | 0              | 0              | 0          | 1          | 0          | 0              | 0              | 0              | 0                 | 0              | 0.0%       | 6.4%       | 0.0%       | 0.0%           | 0.0%           | 0.0%           | 0.0%           | 0.0%           |
| tr I3LN46 I3LN46         | 1             | 0          | 0          | 0              | 0              | 0              | 0              | 0              | 1          | 0          | 0          | 0              | 0              | 0              | 0                 | 0              | 21.7%      | 0.0%       | 0.0%       | 0.0%           | 0.0%           | 0.0%           | 0.0%           | 0.0%           |
| tr I3LMS6 I3LMS6         | 1             | 0          | 0          | 0              | 0              | 0              | 0              | 0              | 1          | 0          | 0          | 0              | 0              | 0              | 0                 | 0              | 11.2%      | 0.0%       | 0.0%       | 0.0%           | 0.0%           | 0.0%           | 0.0%           | 0.0%           |
| tr F1SGE5 F1SGE5         | 0             | 1          | 0          | 0              | 0              | 0              | 0              | 0              | 0          | 1          | 0          | 0              | 0              | 0              | 0                 | 0              | 0.0%       | 2.8%       | 0.0%       | 0.0%           | 0.0%           | 0.0%           | 0.0%           | 0.0%           |
| tr I3LVP2 I3LVP2         | 0             | 1          | 0          | 0              | 0              | 0              | 0              | 0              | 0          | 1          | 0          | 0              | 0              | 0              | 0                 | 0              | 0.0%       | 5.0%       | 0.0%       | 0.0%           | 0.0%           | 0.0%           | 0.0%           | 0.0%           |
| tr F1SAL9 F1SAL9         | 1             | 0          | 0          | 0              | 0              | 0              | 0              | 0              | 1          | 0          | 0          | 0              | 0              | 0              | 0                 | 0              | 4.6%       | 0.0%       | 0.0%       | 0.0%           | 0.0%           | 0.0%           | 0.0%           | 0.0%           |
| tr F1RPC2 F1RPC2         | 1             | 0          | 0          | 0              | 0              | 0              | 0              | 0              | 1          | 0          | 0          | 0              | 0              | 0              | 0                 | 0              | 3.7%       | 0.0%       | 0.0%       | 0.0%           | 0.0%           | 0.0%           | 0.0%           | 0.0%           |
| tr I3LESS I3LESS         | 0             | 1          | 0          | 0              | 0              | 0              | 0              | 0              | 0          | 1          | 0          | 0              | 0              | 0              | 0                 | 0              | 0.0%       | 2.0%       | 0.0%       | 0.0%           | 0.0%           | 0.0%           | 0.0%           | 0.0%           |
| tr I3LIP1 I3LIP1         | 1             | 0          | 0          | 0              | 0              | 0              | 0              | 0              | 1          | 0          | 0          | 0              | 0              | 0              | 0                 | 0              | 12.2%      | 0.0%       | 0.0%       | 0.0%           | 0.0%           | 0.0%           | 0.0%           | 0.0%           |
| tr I3LIN2 I3LIN2         | 1             | 0          | 0          | 0              | 0              | 0              | 0              | 0              | 1          | 0          | 0          | 0              | 0              | 0              | 0                 | 0              | 11.8%      | 0.0%       | 0.0%       | 0.0%           | 0.0%           | 0.0%           | 0.0%           | 0.0%           |
| Reverse_tr I3LSX2 I3LSX2 | 0             | 1          | 0          | 0              | 0              | 0              | 0              | 0              | 0          | 1          | 0          | 0              | 0              | 0              | 0                 | 0              | 0.0%       | 1.6%       | 0.0%       | 0.0%           | 0.0%           | 0.0%           | 0.0%           | 0.0%           |
| tr F1S0W2 F1S0W2         | 1             | 0          | 0          | 0              | 0              | 0              | 0              | 0              | 1          | 0          | 0          | 0              | 0              | 0              | 0                 | 0              | 9.6%       | 0.0%       | 0.0%       | 0.0%           | 0.0%           | 0.0%           | 0.0%           | 0.0%           |
| tr I3LCE6 I3LCE6         | 1             | 0          | 0          | 0              | 0              | 0              | 0              | 0              | 1          | 0          | 0          | 0              | 0              | 0              | 0                 | 0              | 1.4%       | 0.0%       | 0.0%       | 0.0%           | 0.0%           | 0.0%           | 0.0%           | 0.0%           |
| tr K7GP00 K7GP00         | 1             | 0          | 0          | 0              | 0              | 0              | 0              | 0              | 1          | 0          | 0          | 0              | 0              | 0              | 0                 | 0              | 5.0%       | 0.0%       | 0.0%       | 0.0%           | 0.0%           | 0.0%           | 0.0%           | 0.0%           |
| tr F1RU31 F1RU31         | 1             | 0          | 0          | 0              | 0              | 0              | 0              | 0              | 1          | 0          | 0          | 0              | 0              | 0              | 0                 | 0              | 2.5%       | 0.0%       | 0.0%       | 0.0%           | 0.0%           | 0.0%           | 0.0%           | 0.0%           |
| tr F1RQF4 F1RQF4         | 1             | 0          | 0          | 0              | 0              | 0              | 0              | 0              | 1          | 0          | 0          | 0              | 0              | 0              | 0                 | 0              | 9.2%       | 0.0%       | 0.0%       | 0.0%           | 0.0%           | 0.0%           | 0.0%           | 0.0%           |
| tr F1SKT8 F1SKT8         | 0             | 1          | 0          | 0              | 0              | 0              | 0              | 0              | 0          | 1          | 0          | 0              | 0              | 0              | 0                 | 0              | 0.0%       | 1.9%       | 0.0%       | 0.0%           | 0.0%           | 0.0%           | 0.0%           | 0.0%           |
| tr F1RPT0 F1RPT0         | 1             | 0          | 0          | 0              | 0              | 0              | 0              | 0              | 1          | 0          | 0          | 0              | 0              | 0              | 0                 | 0              | 7.2%       | 0.0%       | 0.0%       | 0.0%           | 0.0%           | 0.0%           | 0.0%           | 0.0%           |
| tr I3LGD7 I3LGD7         | 1             | 0          | 0          | 0              | 0              | 0              | 0              | 0              | 1          | 0          | 0          | 0              | 0              | 0              | 0                 | 0              | 7.8%       | 0.0%       | 0.0%       | 0.0%           | 0.0%           | 0.0%           | 0.0%           | 0.0%           |
| tr I3L904 I3L904         | 1             | 0          | 0          | 0              | 0              | 0              | 0              | 0              | 1          | 0          | 0          | 0              | 0              | 0              | 0                 | 0              | 10.2%      | 0.0%       | 0.0%       | 0.0%           | 0.0%           | 0.0%           | 0.0%           | 0.0%           |
| tr K7GRZ3 K7GRZ3         | 1             | 0          | 0          | 0              | 0              | 0              | 0              | 0              | 1          | 0          | 0          | 0              | 0              | 0              | 0                 | 0              | 13.1%      | 0.0%       | 0.0%       | 0.0%           | 0.0%           | 0.0%           | 0.0%           | 0.0%           |
| tr K7GKH1 K7GKH1         | 0             | 1          | 0          | 0              | 0              | 0              | 0              | 0              | 0          | 1          | 0          | 0              | 0              | 0              | 0                 | 0              | 0.0%       | 2.4%       | 0.0%       | 0.0%           | 0.0%           | 0.0%           | 0.0%           | 0.0%           |
| tr F1SAB0 F1SAB0         | 1             | 0          | 0          | 0              | 0              | 0              | 0              | 0              | 1          | 0          | 0          | 0              | 0              | 0              | 0                 | 0              | 3.4%       | 0.0%       | 0.0%       | 0.0%           | 0.0%           | 0.0%           | 0.0%           | 0.0%           |
| tr F1RX38 F1RX38         | 1             | 0          | 0          | 0              | 0              | 0              | 0              | 0              | 1          | 0          | 0          | 0              | 0              | 0              | 0                 | 0              | 4.5%       | 0.0%       | 0.0%       | 0.0%           | 0.0%           | 0.0%           | 0.0%           | 0.0%           |
| tr I3LKK6 I3LKK6         | 1             | 0          | 0          | 0              | 0              | 0              | 0              | 0              | 1          | 0          | 0          | 0              | 0              | 0              | 0                 | 0              | 1.6%       | 0.0%       | 0.0%       | 0.0%           | 0.0%           | 0.0%           | 0.0%           | 0.0%           |
| tr I3L9V1 I3L9V1         | 1             | 0          | 0          | 0              | 0              | 0              | 0              | 0              | 1          | 0          | 0          | 0              | 0              | 0              | 0                 | 0              | 1.7%       | 0.0%       | 0.0%       | 0.0%           | 0.0%           | 0.0%           | 0.0%           | 0.0%           |
| tr F1RSX7 F1RSX7         | 1             | 0          | 0          | 0              | 0              | 0              | 0              | 0              | 1          | 0          | 0          | 0              | 0              | 0              | 0                 | 0              | 4.0%       | 0.0%       | 0.0%       | 0.0%           | 0.0%           | 0.0%           | 0.0%           | 0.0%           |
| tr F1RVV7 F1RVV7         | 1             | 0          | 0          | 0              | 0              | 0              | 0              | 0              | 1          | 0          | 0          | 0              | 0              | 0              | 0                 | 0              | 4.1%       | 0.0%       | 0.0%       | 0.0%           | 0.0%           | 0.0%           | 0.0%           | 0.0%           |
| Q1A730                   | 0             | 1          | 0          | 0              | 0              | 0              | 0              | 0              | 0          | 1          | 0          | 0              | 0              | 0              | 0                 | 0              | 0.0%       | 5.1%       | 0.0%       | 0.0%           | 0.0%           | 0.0%           | 0.0%           | 0.0%           |
| tr G5EA75 G5EA75         | 1             | 0          | 0          | 0              | 0              | 0              | 0              | 0              | 1          | 0          | 0          | 0              | 0              | 0              | 0                 | 0              | 18.8%      | 0.0%       | 0.0%       | 0.0%           | 0.0%           | 0.0%           | 0.0%           | 0.0%           |
| tr I3LUY0 I3LUY0         | 1             | 0          | 0          | 0              | 0              | 0              | 0              | 0              | 1          | 0          | 0          | 0              | 0              | 0              | 0                 | 0              | 4.9%       | 0.0%       | 0.0%       | 0.0%           | 0.0%           | 0.0%           | 0.0%           | 0.0%           |
| tr I3LSE8 I3LSE8         | 0             | 1          | 0          | 0              | 0              | 0              | 0              | 0              | 0          | 1          | 0          | 0              | 0              | 0              | 0                 | 0              | 0.0%       | 2.7%       | 0.0%       | 0.0%           | 0.0%           | 0.0%           | 0.0%           | 0.0%           |
| Q06AU3                   | 0             | 1          | 0          | 0              | 0              | 0              | 0              | 0              | 0          | 1          | 0          | 0              | 0              | 0              | 0                 | 0              | 0.0%       | 8.6%       | 0.0%       | 0.0%           | 0.0%           | 0.0%           | 0.0%           | 0.0%           |
| tr F1SU69 F1SU69         | 0             | 1          | 0          | 0              | 0              | 0              | 0              | 0              | 0          | 1          | 0          | 0              | 0              | 0              | 0                 | 0              | 0.0%       | 1.6%       | 0.0%       | 0.0%           | 0.0%           | 0.0%           | 0.0%           | 0.0%           |
| tr F1STU9 F1STU9         | 1             | 0          | 0          | 0              | 0              | 0              | 0              | 0              | 1          | 0          | 0          | 0              | 0              | 0              | 0                 | 0              | 0.8%       | 0.0%       | 0.0%       | 0.0%           | 0.0%           | 0.0%           | 0.0%           | 0.0%           |
| tr F1SV36 F1SV36         | 0             | 1          | 0          | 0              | 0              | 0              | 0              | 0              | 0          | 1          | 0          | 0              | 0              | 0              | 0                 | 0              | 0.0%       | 3.7%       | 0.0%       | 0.0%           | 0.0%           | 0.0%           | 0.0%           | 0.0%           |
| tr I3LFE4 I3LFE4         | 0             | 1          | 0          | 0              | 0              | 0              | 0              | 0              | 0          | 1          | 0          | 0              | 0              | 0              | 0                 | 0              | 0.0%       | 11.8%      | 0.0%       | 0.0%           | 0.0%           | 0.0%           | 0.0%           | 0.0%           |
| tr F1S4V3 F1S4V3         | 0             | 1          | 0          | 0              | 0              | 0              | 0              | 0              | 0          | 1          | 0          | 0              | 0              | 0              | 0                 | 0              | 0.0%       | 2.4%       | 0.0%       | 0.0%           | 0.0%           | 0.0%           | 0.0%           | 0.0%           |
| tr I3L727 I3L727         | 0             | 1          | 0          | 0              | 0              | 0              | 0              | 0              | 0          | 1          | 0          | 0              | 0              | 0              | 0                 | 0              | 0.0%       | 1.5%       | 0.0%       | 0.0%           | 0.0%           | 0.0%           | 0.0%           | 0.0%           |
| tr F1SJV7 F1SJV7         | 1             | 0          | 0          | 0              | 0              | 0              | 0              | 0              | 1          | 0          | 0          | 0              | 0              | 0              | 0                 | 0              | 4.2%       | 0.0%       | 0.0%       | 0.0%           | 0.0%           | 0.0%           | 0.0%           | 0.0%           |
| tr F1RKW6 F1RKW6         | 1             | 0          | 0          | 0              | 0              | 0              | 0              | 0              | 1          | 0          | 0          | 0              | 0              | 0              | 0                 | 0              | 5.6%       | 0.0%       | 0.0%       | 0.0%           | 0.0%           | 0.0%           | 0.0%           | 0.0%           |
| tr F2Z596 F2Z596         | 1             | 0          | 0          | 0              | 0              | 0              | 0              | 0              | 1          | 0          | 0          | 0              | 0              | 0              | 0                 | 0              | 20.4%      | 0.0%       | 0.0%       | 0.0%           | 0.0%           | 0.0%           | 0.0%           | 0.0%           |
| tr I3LBD6 I3LBD6         | 1             | 0          | 0          | 0              | 0              | 0              | 0              | 0              | 1          | 0          | 0          | 0              | 0              | 0              | 0                 | 0              | 5.3%       | 0.0%       | 0.0%       | 0.0%           | 0.0%           | 0.0%           | 0.0%           | 0.0%           |
| Reverse_tr F1RFK3 F1RFK3 | 1             | 0          | 0          | 0              | 0              | 0              | 0              | 0              | 1          | 0          | 0          | 0              | 0              | 0              | 0                 | 0              | 0.7%       | 0.0%       | 0.0%       | 0.0%           | 0.0%           | 0.0%           | 0.0%           | 0.0%           |
| tr F1S536 F1S536         | 1             | 0          | 0          | 0              | 0              | 0              | 0              | 0              | 1          | 0          | 0          | 0              | 0              | 0              | 0                 | 0              | 2.4%       | 0.0%       | 0.0%       | 0.0%           | 0.0%           | 0.0%           | 0.0%           | 0.0%           |
| tr I3LDJ9 I3LDJ9         | 1             | 0          | 0          | 0              | 0              | 0              | 0              | 0              | 1          | 0          | 0          | 0              | 0              | 0              | 0                 | 0              | 4.2%       | 0.0%       | 0.0%       | 0.0%           | 0.0%           | 0.0%           | 0.0%           | 0.0%           |
| tr K7GLY1 K7GLY1         | 1             | 0          | 0          | 0              | 0              | 0              | 0              | 0              | 1          | 0          | 0          | 0              | 0              | 0              | 0                 | 0              | 6.2%       | 0.0%       | 0.0%       | 0.0%           | 0.0%           | 0.0%           | 0.0%           | 0.0%           |
| tr I3LIA5 I3LIA5         | 1             | 0          | 0          | 0              | 0              | 0              | 0              | 0              | 1          | 0          | 0          | 0              | 0              | 0              | 0                 | 0              | 7.5%       | 0.0%       | 0.0%       | 0.0%           | 0.0%           | 0.0%           | 0.0%           | 0.0%           |
| tr I3LAV9 I3LAV9         | 1             | 0          | 0          | 0              | 0              | 0              | 0              | 0              | 1          | 0          | 0          | 0              | 0              | 0              | 0                 | 0              | 2.1%       | 0.0%       | 0.0%       | 0.0%           | 0.0%           | 0.0%           | 0.0%           | 0.0%           |
| tr K7GRCS K7GRCS         | 0             | 1          | 0          | 0              | 0              | 0              | 0              | 0              | 0          | 1          | 0          | 0              | 0              | 0              | 0                 | 0              | 0.0%       | 1.9%       | 0.0%       | 0.0%           | 0.0%           | 0.0%           | 0.0%           | 0.0%           |
| tr F2Z5I0 F2Z5I0         | 0             | 1          | 0          | 0              | 0              | 0              | 0              | 0              | 0          | 1          | 0          | 0              | 0              | 0              | 0                 | 0              | 0.0%       | 14.5%      | 0.0%       | 0.0%           | 0.0%           | 0.0%           | 0.0%           | 0.0%           |
| tr F1SA76 F1SA76         | 0             | 1          | 0          | 0              | 0              | 0              | 0              | 0              | 0          | 1          | 0          | 0              | 0              | 0              | 0                 | 0              | 0.0%       | 3.7%       | 0.0%       | 0.0%           | 0.0%           | 0.0%           | 0.0%           | 0.0%           |
| tr F1S4S9 F1S4S9         | 1             | 0          | 0          | 0              | 0              | 0              | 0              | 0              | 1          | 0          | 0          | 0              | 0              | 0              | 0                 | 0              | 1.7%       | 0.0%       | 0.0%       | 0.0%           | 0.0%           | 0.0%           | 0.0%           | 0.0%           |
| tr F1RT49 F1RT49         | 1             | 0          | 0          | 0              | 0              | 0              | 0              | 0              | 1          | 0          | 0          | 0              | 0              | 0              | 0                 | 0              | 0.8%       | 0.0%       | 0.0%       | 0.0%           | 0.0%           | 0.0%           | 0.0%           | 0.0%           |
| tr F1RK61 F1RK61         | 1             | 0          | 0          | 0              | 0              | 0              | 0              | 0              | 1          | 0          | 0          | 0              | 0              | 0              | 0                 | 0              | 4.9%       | 0.0%       | 0.0%       | 0.0%           | 0.0%           | 0.0%           | 0.0%           | 0.0%           |
| tr F1RUA4 F1RUA4         | 1             | 0          | 0          | 0              | 0              | 0              | 0              | 0              | 1          | 0          | 0          | 0              | 0              | 0              | 0                 | 0              | 3.8%       | 0.0%       | 0.0%       | 0.0%           | 0.0%           | 0.0%           | 0.0%           | 0.0%           |
| tr I3LFY4 I3LFY4         | 0             | 1          | 0          | 0              | 0              | 0              | 0              | 0              | 0          | 1          | 0          | 0              | 0              | 0              | 0                 | 0              | 0.0%       | 0.8%       | 0.0%       | 0.0%           | 0.0%           | 0.0%           | 0.0%           | 0.0%           |
| tr F1SNV6 F1SNV6         | 0             | 1          | 0          | 0              | 0              | 0              | 0              | 0              | 0          | 1          | 0          | 0              | 0              | 0              | 0                 | 0              | 0.0%       | 6.5%       | 0.0%       | 0.0%           | 0.0%           | 0.0%           | 0.0%           | 0.0%           |
| tr I3LDB5 I3LDB5         | 1             | 0          | 0          | 0              | 0              | 0              | 0              | 0              | 1          | 0          | 0          | 0              | 0              | 0              | 0                 | 0              | 12.4%      | 0.0%       | 0.0%       | 0.0%           | 0.0%           | 0.0%           | 0.0%           | 0.0%           |
| tr I3LJF4 I3LJF4         | 0             | 1          | 0          | 0              | 0              | 0              | 0              | 0              | 0          | 1          | 0          |                |                |                |                   |                |            |            |            |                |                |                |                |                |

| Accession                | Sample# | Peptide Count |            |            |                |                |                |                | Spectral Count |            |            |                |                |                |                | Sequence Coverage |            |            |                |                |                |                |      |
|--------------------------|---------|---------------|------------|------------|----------------|----------------|----------------|----------------|----------------|------------|------------|----------------|----------------|----------------|----------------|-------------------|------------|------------|----------------|----------------|----------------|----------------|------|
|                          |         | Whole Cell    | Whole Cell | Whole Cell | Cilia Fraction | Cilia Fraction | Cilia Fraction | Cilia Fraction | Whole Cell     | Whole Cell | Whole Cell | Cilia Fraction | Cilia Fraction | Cilia Fraction | Cilia Fraction | Whole Cell        | Whole Cell | Whole Cell | Cilia Fraction | Cilia Fraction | Cilia Fraction | Cilia Fraction |      |
|                          |         | 1             | 2          | 6          | 4              | 3              | 5              | 7              | 1              | 2          | 6          | 4              | 3              | 5              | 7              | 1                 | 2          | 6          | 4              | 3              | 5              | 7              | 8    |
| tr I3LN04 I3LN04         |         | 0             | 1          | 0          | 0              | 0              | 0              | 0              | 0              | 1          | 0          | 0              | 0              | 0              | 0              | 0.0%              | 1.4%       | 0.0%       | 0.0%           | 0.0%           | 0.0%           | 0.0%           | 0.0% |
| tr F1RSS6 F1RSS6         |         | 0             | 1          | 0          | 0              | 0              | 0              | 0              | 0              | 1          | 0          | 0              | 0              | 0              | 0              | 0.0%              | 2.2%       | 0.0%       | 0.0%           | 0.0%           | 0.0%           | 0.0%           | 0.0% |
| tr F1RT46 F1RT46         |         | 0             | 1          | 0          | 0              | 0              | 0              | 0              | 0              | 1          | 0          | 0              | 0              | 0              | 0              | 0.0%              | 1.9%       | 0.0%       | 0.0%           | 0.0%           | 0.0%           | 0.0%           | 0.0% |
| tr F1SKT6 F1SKT6         |         | 0             | 1          | 0          | 0              | 0              | 0              | 0              | 0              | 1          | 0          | 0              | 0              | 0              | 0              | 0.0%              | 2.5%       | 0.0%       | 0.0%           | 0.0%           | 0.0%           | 0.0%           | 0.0% |
| tr F1RU84 F1RU84         |         | 0             | 1          | 0          | 0              | 0              | 0              | 0              | 0              | 1          | 0          | 0              | 0              | 0              | 0              | 0.0%              | 3.5%       | 0.0%       | 0.0%           | 0.0%           | 0.0%           | 0.0%           | 0.0% |
| tr F1SUV2 F1SUV2         |         | 0             | 1          | 0          | 0              | 0              | 0              | 0              | 0              | 1          | 0          | 0              | 0              | 0              | 0              | 0.0%              | 0.9%       | 0.0%       | 0.0%           | 0.0%           | 0.0%           | 0.0%           | 0.0% |
| tr I3LML2 I3LML2         |         | 1             | 0          | 0          | 0              | 0              | 0              | 0              | 1              | 0          | 0          | 0              | 0              | 0              | 0              | 8.4%              | 0.0%       | 0.0%       | 0.0%           | 0.0%           | 0.0%           | 0.0%           | 0.0% |
| tr I3L702 I3L702         |         | 0             | 1          | 0          | 0              | 0              | 0              | 0              | 0              | 1          | 0          | 0              | 0              | 0              | 0              | 0.0%              | 5.0%       | 0.0%       | 0.0%           | 0.0%           | 0.0%           | 0.0%           | 0.0% |
| tr I3LVB6 I3LVB6         |         | 1             | 0          | 0          | 0              | 0              | 0              | 0              | 1              | 0          | 0          | 0              | 0              | 0              | 0              | 10.9%             | 0.0%       | 0.0%       | 0.0%           | 0.0%           | 0.0%           | 0.0%           | 0.0% |
| tr F1RS30 F1RS30         |         | 1             | 0          | 0          | 0              | 0              | 0              | 0              | 1              | 0          | 0          | 0              | 0              | 0              | 0              | 3.6%              | 0.0%       | 0.0%       | 0.0%           | 0.0%           | 0.0%           | 0.0%           | 0.0% |
| tr F1RRF3 F1RRF3         |         | 1             | 0          | 0          | 0              | 0              | 0              | 0              | 1              | 0          | 0          | 0              | 0              | 0              | 0              | 2.8%              | 0.0%       | 0.0%       | 0.0%           | 0.0%           | 0.0%           | 0.0%           | 0.0% |
| tr F1RSW2 F1RSW2         |         | 0             | 1          | 0          | 0              | 0              | 0              | 0              | 0              | 1          | 0          | 0              | 0              | 0              | 0              | 0.0%              | 1.1%       | 0.0%       | 0.0%           | 0.0%           | 0.0%           | 0.0%           | 0.0% |
| tr F1S2U6 F1S2U6         |         | 0             | 1          | 0          | 0              | 0              | 0              | 0              | 0              | 1          | 0          | 0              | 0              | 0              | 0              | 0.0%              | 2.1%       | 0.0%       | 0.0%           | 0.0%           | 0.0%           | 0.0%           | 0.0% |
| tr F1RM20 F1RM20         |         | 0             | 1          | 0          | 0              | 0              | 0              | 0              | 0              | 1          | 0          | 0              | 0              | 0              | 0              | 0.0%              | 2.6%       | 0.0%       | 0.0%           | 0.0%           | 0.0%           | 0.0%           | 0.0% |
| tr K7GQF0 K7GQF0         |         | 0             | 1          | 0          | 0              | 0              | 0              | 0              | 0              | 1          | 0          | 0              | 0              | 0              | 0              | 0.0%              | 10.0%      | 0.0%       | 0.0%           | 0.0%           | 0.0%           | 0.0%           | 0.0% |
| tr F1RSV8 F1RSV8         |         | 0             | 1          | 0          | 0              | 0              | 0              | 0              | 0              | 1          | 0          | 0              | 0              | 0              | 0              | 0.0%              | 0.8%       | 0.0%       | 0.0%           | 0.0%           | 0.0%           | 0.0%           | 0.0% |
| tr F1SLH8 F1SLH8         |         | 1             | 0          | 0          | 0              | 0              | 0              | 0              | 1              | 0          | 0          | 0              | 0              | 0              | 0              | 17.9%             | 0.0%       | 0.0%       | 0.0%           | 0.0%           | 0.0%           | 0.0%           | 0.0% |
| tr I3LGD1 I3LGD1         |         | 1             | 0          | 0          | 0              | 0              | 0              | 0              | 1              | 0          | 0          | 0              | 0              | 0              | 0              | 3.8%              | 0.0%       | 0.0%       | 0.0%           | 0.0%           | 0.0%           | 0.0%           | 0.0% |
| tr F1SB14 F1SB14         |         | 1             | 0          | 0          | 0              | 0              | 0              | 0              | 1              | 0          | 0          | 0              | 0              | 0              | 0              | 15.9%             | 0.0%       | 0.0%       | 0.0%           | 0.0%           | 0.0%           | 0.0%           | 0.0% |
| tr I3LLI6 I3LLI6         |         | 0             | 1          | 0          | 0              | 0              | 0              | 0              | 0              | 1          | 0          | 0              | 0              | 0              | 0              | 0.0%              | 5.0%       | 0.0%       | 0.0%           | 0.0%           | 0.0%           | 0.0%           | 0.0% |
| tr K7GKA0 K7GKA0         |         | 1             | 0          | 0          | 0              | 0              | 0              | 0              | 1              | 0          | 0          | 0              | 0              | 0              | 0              | 16.4%             | 0.0%       | 0.0%       | 0.0%           | 0.0%           | 0.0%           | 0.0%           | 0.0% |
| tr F1SD83 F1SD83         |         | 1             | 0          | 0          | 0              | 0              | 0              | 0              | 1              | 0          | 0          | 0              | 0              | 0              | 0              | 3.6%              | 0.0%       | 0.0%       | 0.0%           | 0.0%           | 0.0%           | 0.0%           | 0.0% |
| tr F1SQN7 F1SQN7         |         | 1             | 0          | 0          | 0              | 0              | 0              | 0              | 1              | 0          | 0          | 0              | 0              | 0              | 0              | 2.5%              | 0.0%       | 0.0%       | 0.0%           | 0.0%           | 0.0%           | 0.0%           | 0.0% |
| Q9N1U3                   |         | 1             | 0          | 0          | 0              | 0              | 0              | 0              | 1              | 0          | 0          | 0              | 0              | 0              | 0              | 2.9%              | 0.0%       | 0.0%       | 0.0%           | 0.0%           | 0.0%           | 0.0%           | 0.0% |
| tr K7GRB5 K7GRB5         |         | 0             | 1          | 0          | 0              | 0              | 0              | 0              | 0              | 1          | 0          | 0              | 0              | 0              | 0              | 0.0%              | 8.4%       | 0.0%       | 0.0%           | 0.0%           | 0.0%           | 0.0%           | 0.0% |
| tr F1S6M0 F1S6M0         |         | 1             | 0          | 0          | 0              | 0              | 0              | 0              | 1              | 0          | 0          | 0              | 0              | 0              | 0              | 14.2%             | 0.0%       | 0.0%       | 0.0%           | 0.0%           | 0.0%           | 0.0%           | 0.0% |
| tr F1SI07 F1SI07         |         | 1             | 0          | 0          | 0              | 0              | 0              | 0              | 1              | 0          | 0          | 0              | 0              | 0              | 0              | 1.8%              | 0.0%       | 0.0%       | 0.0%           | 0.0%           | 0.0%           | 0.0%           | 0.0% |
| tr F1RXA0 F1RXA0         |         | 0             | 1          | 0          | 0              | 0              | 0              | 0              | 0              | 1          | 0          | 0              | 0              | 0              | 0              | 0.0%              | 1.3%       | 0.0%       | 0.0%           | 0.0%           | 0.0%           | 0.0%           | 0.0% |
| tr I3LGI4 I3LGI4         |         | 1             | 0          | 0          | 0              | 0              | 0              | 0              | 1              | 0          | 0          | 0              | 0              | 0              | 0              | 5.6%              | 0.0%       | 0.0%       | 0.0%           | 0.0%           | 0.0%           | 0.0%           | 0.0% |
| tr I3LPI5 I3LPI5         |         | 0             | 1          | 0          | 0              | 0              | 0              | 0              | 0              | 1          | 0          | 0              | 0              | 0              | 0              | 0.0%              | 1.5%       | 0.0%       | 0.0%           | 0.0%           | 0.0%           | 0.0%           | 0.0% |
| tr I3LUE3 I3LUE3         |         | 0             | 1          | 0          | 0              | 0              | 0              | 0              | 0              | 1          | 0          | 0              | 0              | 0              | 0              | 0.0%              | 1.3%       | 0.0%       | 0.0%           | 0.0%           | 0.0%           | 0.0%           | 0.0% |
| tr K7GKT9 K7GKT9         |         | 1             | 0          | 0          | 0              | 0              | 0              | 0              | 1              | 0          | 0          | 0              | 0              | 0              | 0              | 11.5%             | 0.0%       | 0.0%       | 0.0%           | 0.0%           | 0.0%           | 0.0%           | 0.0% |
| tr K7GMV3 K7GMV3         |         | 1             | 0          | 0          | 0              | 0              | 0              | 0              | 1              | 0          | 0          | 0              | 0              | 0              | 0              | 5.9%              | 0.0%       | 0.0%       | 0.0%           | 0.0%           | 0.0%           | 0.0%           | 0.0% |
| tr F1RS38 F1RS38         |         | 1             | 0          | 0          | 0              | 0              | 0              | 0              | 1              | 0          | 0          | 0              | 0              | 0              | 0              | 14.9%             | 0.0%       | 0.0%       | 0.0%           | 0.0%           | 0.0%           | 0.0%           | 0.0% |
| tr I3LUT7 I3LUT7         |         | 1             | 0          | 0          | 0              | 0              | 0              | 0              | 1              | 0          | 0          | 0              | 0              | 0              | 0              | 6.9%              | 0.0%       | 0.0%       | 0.0%           | 0.0%           | 0.0%           | 0.0%           | 0.0% |
| tr F2ZSR8 F2ZSR8         |         | 1             | 0          | 0          | 0              | 0              | 0              | 0              | 1              | 0          | 0          | 0              | 0              | 0              | 0              | 9.5%              | 0.0%       | 0.0%       | 0.0%           | 0.0%           | 0.0%           | 0.0%           | 0.0% |
| tr F1SBA6 F1SBA6         |         | 1             | 0          | 0          | 0              | 0              | 0              | 0              | 1              | 0          | 0          | 0              | 0              | 0              | 0              | 4.3%              | 0.0%       | 0.0%       | 0.0%           | 0.0%           | 0.0%           | 0.0%           | 0.0% |
| tr F1RKS6 F1RKS6         |         | 0             | 1          | 0          | 0              | 0              | 0              | 0              | 0              | 1          | 0          | 0              | 0              | 0              | 0              | 0.0%              | 3.1%       | 0.0%       | 0.0%           | 0.0%           | 0.0%           | 0.0%           | 0.0% |
| tr K7GQ31 K7GQ31         |         | 1             | 0          | 0          | 0              | 0              | 0              | 0              | 1              | 0          | 0          | 0              | 0              | 0              | 0              | 5.5%              | 0.0%       | 0.0%       | 0.0%           | 0.0%           | 0.0%           | 0.0%           | 0.0% |
| tr I3LCH8 I3LCH8         |         | 1             | 0          | 0          | 0              | 0              | 0              | 0              | 1              | 0          | 0          | 0              | 0              | 0              | 0              | 3.4%              | 0.0%       | 0.0%       | 0.0%           | 0.0%           | 0.0%           | 0.0%           | 0.0% |
| tr F1RLM7 F1RLM7         |         | 1             | 0          | 0          | 0              | 0              | 0              | 0              | 1              | 0          | 0          | 0              | 0              | 0              | 0              | 3.6%              | 0.0%       | 0.0%       | 0.0%           | 0.0%           | 0.0%           | 0.0%           | 0.0% |
| tr K7GNF9 K7GNF9         |         | 1             | 0          | 0          | 0              | 0              | 0              | 0              | 1              | 0          | 0          | 0              | 0              | 0              | 0              | 7.6%              | 0.0%       | 0.0%       | 0.0%           | 0.0%           | 0.0%           | 0.0%           | 0.0% |
| tr F1RFQ9 F1RFQ9         |         | 1             | 0          | 0          | 0              | 0              | 0              | 0              | 1              | 0          | 0          | 0              | 0              | 0              | 0              | 1.9%              | 0.0%       | 0.0%       | 0.0%           | 0.0%           | 0.0%           | 0.0%           | 0.0% |
| Reverse_tr F1RJ23 F1RJ23 |         | 1             | 0          | 0          | 0              | 0              | 0              | 0              | 1              | 0          | 0          | 0              | 0              | 0              | 0              | 5.5%              | 0.0%       | 0.0%       | 0.0%           | 0.0%           | 0.0%           | 0.0%           | 0.0% |
| tr F1SDQ0 F1SDQ0         |         | 1             | 0          | 0          | 0              | 0              | 0              | 0              | 1              | 0          | 0          | 0              | 0              | 0              | 0              | 3.2%              | 0.0%       | 0.0%       | 0.0%           | 0.0%           | 0.0%           | 0.0%           | 0.0% |
| tr F1S8I5 F1S8I5         |         | 0             | 1          | 0          | 0              | 0              | 0              | 0              | 0              | 1          | 0          | 0              | 0              | 0              | 0              | 0.0%              | 1.1%       | 0.0%       | 0.0%           | 0.0%           | 0.0%           | 0.0%           | 0.0% |
| tr F1SAZ6 F1SAZ6         |         | 1             | 0          | 0          | 0              | 0              | 0              | 0              | 1              | 0          | 0          | 0              | 0              | 0              | 0              | 12.2%             | 0.0%       | 0.0%       | 0.0%           | 0.0%           | 0.0%           | 0.0%           | 0.0% |
| tr F1SK65 F1SK65         |         | 1             | 0          | 0          | 0              | 0              | 0              | 0              | 1              | 0          | 0          | 0              | 0              | 0              | 0              | 4.4%              | 0.0%       | 0.0%       | 0.0%           | 0.0%           | 0.0%           | 0.0%           | 0.0% |
| tr K7GP65 K7GP65         |         | 1             | 0          | 0          | 0              | 0              | 0              | 0              | 1              | 0          | 0          | 0              | 0              | 0              | 0              | 13.7%             | 0.0%       | 0.0%       | 0.0%           | 0.0%           | 0.0%           | 0.0%           | 0.0% |
| tr I3L9V4 I3L9V4         |         | 1             | 0          | 0          | 0              | 0              | 0              | 0              | 1              | 0          | 0          | 0              | 0              | 0              | 0              | 17.5%             | 0.0%       | 0.0%       | 0.0%           | 0.0%           | 0.0%           | 0.0%           | 0.0% |
| tr F1SU56 F1SU56         |         | 1             | 0          | 0          | 0              | 0              | 0              | 0              | 1              | 0          | 0          | 0              | 0              | 0              | 0              | 1.2%              | 0.0%       | 0.0%       | 0.0%           | 0.0%           | 0.0%           | 0.0%           | 0.0% |
| tr F1RHF1 F1RHF1         |         | 1             | 0          | 0          | 0              | 0              | 0              | 0              | 1              | 0          | 0          | 0              | 0              | 0              | 0              | 4.1%              | 0.0%       | 0.0%       | 0.0%           | 0.0%           | 0.0%           | 0.0%           | 0.0% |
| tr K7GM36 K7GM36         |         | 0             | 1          | 0          | 0              | 0              | 0              | 0              | 0              | 1          | 0          | 0              | 0              | 0              | 0              | 0.0%              | 6.9%       | 0.0%       | 0.0%           | 0.0%           | 0.0%           | 0.0%           | 0.0% |
| tr I3LB03 I3LB03         |         | 1             | 0          | 0          | 0              | 0              | 0              | 0              | 1              | 0          | 0          | 0              | 0              | 0              | 0              | 2.9%              | 0.0%       | 0.0%       | 0.0%           | 0.0%           | 0.0%           | 0.0%           | 0.0% |
| tr F1SGM5 F1SGM5         |         | 1             | 0          | 0          | 0              | 0              | 0              | 0              | 1              | 0          | 0          | 0              | 0              | 0              | 0              | 3.6%              | 0.0%       | 0.0%       | 0.0%           | 0.0%           | 0.0%           | 0.0%           | 0.0% |
| Reverse_tr F1RMS4 F1RMS4 |         | 0             | 1          | 0          | 0              | 0              | 0              | 0              | 0              | 1          | 0          | 0              | 0              | 0              | 0              | 0.0%              | 5.6%       | 0.0%       | 0.0%           | 0.0%           | 0.0%           | 0.0%           | 0.0% |
| tr I3LQ27 I3LQ27         |         | 1             | 0          | 0          | 0              | 0              | 0              | 0              | 1              | 0          | 0          | 0              | 0              | 0              | 0              | 6.1%              | 0.0%       | 0.0%       | 0.0%           | 0.0%           | 0.0%           | 0.0%           | 0.0% |
| tr I3LSI6 I3LSI6         |         | 0             | 1          | 0          | 0              | 0              | 0              | 0              | 0              | 1          | 0          | 0              | 0              | 0              | 0              | 0.0%              | 1.2%       | 0.0%       | 0.0%           | 0.0%           | 0.0%           | 0.0%           | 0.0% |
| tr C9E1C9 C9E1C9         |         | 1             | 0          | 0          | 0              | 0              | 0              | 0              | 1              | 0          | 0          | 0              | 0              | 0              | 0              | 4.3%              | 0.0%       | 0.0%       | 0.0%           | 0.0%           | 0.0%           | 0.0%           | 0.0% |
| tr F1RSC9 F1RSC9         |         | 1             | 0          | 0          | 0              | 0              | 0              | 0              | 1              | 0          | 0          | 0              | 0              | 0              | 0              | 2.1%              | 0.0%       | 0.0%       | 0.0%           | 0.0%           | 0.0%           | 0.0%           | 0.0% |
| tr F1S9L2 F1S9L2         |         | 1             | 0          | 0          | 0              | 0              | 0              | 0              | 1              | 0          | 0          | 0              | 0              | 0              | 0              | 7.7%              | 0.0%       | 0.0%       | 0.0%           | 0.0%           | 0.0%           | 0.0%           | 0.0% |
| tr F1S1M2 F1S1M2         |         | 1             | 0          | 0          | 0              | 0              | 0              | 0              | 1              | 0          | 0          | 0              | 0              | 0              | 0              | 2.6%              | 0.0%       | 0.0%       | 0.0%           | 0.0%           | 0.0%           | 0.0%           | 0.0% |
| tr F1SHI1 F1SHI1         |         | 0             | 1          | 0          | 0              | 0              | 0              | 0              | 0              | 1          | 0          | 0              | 0              | 0              | 0              | 0.0%              | 1.5%       | 0.0%       | 0.0%           | 0.0%           | 0.0%           | 0.0%           | 0.0% |
| tr I3L5E9 I3L5E9         |         | 1             | 0          | 0          | 0              | 0              | 0              | 0              | 1              | 0          | 0          | 0              | 0              | 0              | 0              | 6.0%              | 0.0%       | 0.0%       | 0.0%           | 0.0%           | 0.0%           | 0.0%           | 0.0% |
| tr I3LRR6 I3LRR6         |         | 1             | 0          | 0          | 0              | 0              | 0              | 0              | 1              | 0          | 0          | 0              | 0              | 0              | 0              | 1.9%              | 0.0%       | 0.0%       | 0.0%           | 0.0%           | 0.0%           | 0.0%           | 0.0% |
| tr F1SRT0 F1SRT0         |         | 1             | 0          | 0          | 0              | 0              | 0              | 0              | 1              | 0          | 0          | 0              | 0              | 0              | 0              | 3.9%              | 0.0%       | 0.0%       | 0.0%           | 0.0%           | 0.0%           | 0.0%           | 0.0% |
| tr F1SH04 F1SH04         |         | 1             | 0          | 0          | 0              | 0              | 0              | 0              | 1              | 0          | 0          | 0              | 0              | 0              | 0              | 2.5%              | 0.0%       | 0.0%       | 0.0%           | 0.0%           | 0.0%           | 0.0%           | 0.0% |
| tr I3L913 I3L913         |         | 1             | 0          | 0          |                |                |                |                |                |            |            |                |                |                |                |                   |            |            |                |                |                |                |      |



| Sample#                  | Peptide Count |            |            |                |                |                |                | Spectral Count |            |            |                |                |                |                | Sequence Coverage |            |            |                |                |                |                |      |      |      |
|--------------------------|---------------|------------|------------|----------------|----------------|----------------|----------------|----------------|------------|------------|----------------|----------------|----------------|----------------|-------------------|------------|------------|----------------|----------------|----------------|----------------|------|------|------|
|                          | Whole Cell    | Whole Cell | Whole Cell | Cilia Fraction | Cilia Fraction | Cilia Fraction | Cilia Fraction | Whole Cell     | Whole Cell | Whole Cell | Cilia Fraction | Cilia Fraction | Cilia Fraction | Cilia Fraction | Whole Cell        | Whole Cell | Whole Cell | Cilia Fraction | Cilia Fraction | Cilia Fraction | Cilia Fraction |      |      |      |
|                          | 1             | 2          | 6          | 4              | 3              | 5              | 7              | 8              | 1          | 2          | 6              | 4              | 3              | 5              | 7                 | 8          | 1          | 2              | 6              | 4              | 3              | 5    | 7    | 8    |
| Accession                |               |            |            |                |                |                |                |                |            |            |                |                |                |                |                   |            |            |                |                |                |                |      |      |      |
| tr F1RSQ0 F1RSQ0         | 1             | 0          | 0          | 0              | 0              | 0              | 0              | 0              | 1          | 0          | 0              | 0              | 0              | 0              | 0                 | 0          | 7.8%       | 0.0%           | 0.0%           | 0.0%           | 0.0%           | 0.0% | 0.0% | 0.0% |
| tr I3LBW6 I3LBW6         | 1             | 0          | 0          | 0              | 0              | 0              | 0              | 0              | 1          | 0          | 0              | 0              | 0              | 0              | 0                 | 0          | 3.9%       | 0.0%           | 0.0%           | 0.0%           | 0.0%           | 0.0% | 0.0% | 0.0% |
| tr F1RM12 F1RM12         | 1             | 0          | 0          | 0              | 0              | 0              | 0              | 0              | 1          | 0          | 0              | 0              | 0              | 0              | 0                 | 0          | 5.1%       | 0.0%           | 0.0%           | 0.0%           | 0.0%           | 0.0% | 0.0% | 0.0% |
| tr I3LP45 I3LP45         | 1             | 0          | 0          | 0              | 0              | 0              | 0              | 0              | 1          | 0          | 0              | 0              | 0              | 0              | 0                 | 0          | 3.4%       | 0.0%           | 0.0%           | 0.0%           | 0.0%           | 0.0% | 0.0% | 0.0% |
| tr I3LB84 I3LB84         | 1             | 0          | 0          | 0              | 0              | 0              | 0              | 0              | 1          | 0          | 0              | 0              | 0              | 0              | 0                 | 0          | 2.5%       | 0.0%           | 0.0%           | 0.0%           | 0.0%           | 0.0% | 0.0% | 0.0% |
| tr F1SAH1 F1SAH1         | 1             | 0          | 0          | 0              | 0              | 0              | 0              | 0              | 1          | 0          | 0              | 0              | 0              | 0              | 0                 | 0          | 2.4%       | 0.0%           | 0.0%           | 0.0%           | 0.0%           | 0.0% | 0.0% | 0.0% |
| tr F1SKW1 F1SKW1         | 0             | 1          | 0          | 0              | 0              | 0              | 0              | 0              | 0          | 1          | 0              | 0              | 0              | 0              | 0                 | 0          | 0.0%       | 0.8%           | 0.0%           | 0.0%           | 0.0%           | 0.0% | 0.0% | 0.0% |
| tr F1RIV4 F1RIV4         | 1             | 0          | 0          | 0              | 0              | 0              | 0              | 0              | 1          | 0          | 0              | 0              | 0              | 0              | 0                 | 0          | 0.6%       | 0.0%           | 0.0%           | 0.0%           | 0.0%           | 0.0% | 0.0% | 0.0% |
| tr K7GMB2 K7GMB2         | 1             | 0          | 0          | 0              | 0              | 0              | 0              | 0              | 1          | 0          | 0              | 0              | 0              | 0              | 0                 | 0          | 3.9%       | 0.0%           | 0.0%           | 0.0%           | 0.0%           | 0.0% | 0.0% | 0.0% |
| tr I3LFU3 I3LFU3         | 1             | 0          | 0          | 0              | 0              | 0              | 0              | 0              | 1          | 0          | 0              | 0              | 0              | 0              | 0                 | 0          | 3.1%       | 0.0%           | 0.0%           | 0.0%           | 0.0%           | 0.0% | 0.0% | 0.0% |
| tr K7GP27 K7GP27         | 0             | 1          | 0          | 0              | 0              | 0              | 0              | 0              | 0          | 1          | 0              | 0              | 0              | 0              | 0                 | 0          | 0.0%       | 14.4%          | 0.0%           | 0.0%           | 0.0%           | 0.0% | 0.0% | 0.0% |
| tr I3L6W1 I3L6W1         | 1             | 0          | 0          | 0              | 0              | 0              | 0              | 0              | 1          | 0          | 0              | 0              | 0              | 0              | 0                 | 0          | 2.8%       | 0.0%           | 0.0%           | 0.0%           | 0.0%           | 0.0% | 0.0% | 0.0% |
| tr F1SE03 F1SE03         | 0             | 1          | 0          | 0              | 0              | 0              | 0              | 0              | 0          | 1          | 0              | 0              | 0              | 0              | 0                 | 0          | 0.0%       | 8.0%           | 0.0%           | 0.0%           | 0.0%           | 0.0% | 0.0% | 0.0% |
| tr I3LU43 I3LU43         | 0             | 1          | 0          | 0              | 0              | 0              | 0              | 0              | 0          | 1          | 0              | 0              | 0              | 0              | 0                 | 0          | 0.0%       | 15.3%          | 0.0%           | 0.0%           | 0.0%           | 0.0% | 0.0% | 0.0% |
| tr F1S3H4 F1S3H4         | 1             | 0          | 0          | 0              | 0              | 0              | 0              | 0              | 1          | 0          | 0              | 0              | 0              | 0              | 0                 | 0          | 4.8%       | 0.0%           | 0.0%           | 0.0%           | 0.0%           | 0.0% | 0.0% | 0.0% |
| tr F1SJJ1 F1SJJ1         | 0             | 1          | 0          | 0              | 0              | 0              | 0              | 0              | 0          | 1          | 0              | 0              | 0              | 0              | 0                 | 0          | 0.0%       | 5.1%           | 0.0%           | 0.0%           | 0.0%           | 0.0% | 0.0% | 0.0% |
| tr F1SAF2 F1SAF2         | 1             | 0          | 0          | 0              | 0              | 0              | 0              | 0              | 1          | 0          | 0              | 0              | 0              | 0              | 0                 | 0          | 6.4%       | 0.0%           | 0.0%           | 0.0%           | 0.0%           | 0.0% | 0.0% | 0.0% |
| Reverse_tr I3LH63 I3LH63 | 1             | 0          | 0          | 0              | 0              | 0              | 0              | 0              | 1          | 0          | 0              | 0              | 0              | 0              | 0                 | 0          | 1.1%       | 0.0%           | 0.0%           | 0.0%           | 0.0%           | 0.0% | 0.0% | 0.0% |
| Reverse_tr F1SJC7 F1SJC7 | 0             | 1          | 0          | 0              | 0              | 0              | 0              | 0              | 0          | 1          | 0              | 0              | 0              | 0              | 0                 | 0          | 0.0%       | 0.9%           | 0.0%           | 0.0%           | 0.0%           | 0.0% | 0.0% | 0.0% |
| tr F1S7Y1 F1S7Y1         | 1             | 0          | 0          | 0              | 0              | 0              | 0              | 0              | 1          | 0          | 0              | 0              | 0              | 0              | 0                 | 0          | 2.2%       | 0.0%           | 0.0%           | 0.0%           | 0.0%           | 0.0% | 0.0% | 0.0% |
| tr F1RW49 F1RW49         | 1             | 0          | 0          | 0              | 0              | 0              | 0              | 0              | 1          | 0          | 0              | 0              | 0              | 0              | 0                 | 0          | 1.6%       | 0.0%           | 0.0%           | 0.0%           | 0.0%           | 0.0% | 0.0% | 0.0% |
| tr F1STI7 F1STI7         | 0             | 1          | 0          | 0              | 0              | 0              | 0              | 0              | 0          | 1          | 0              | 0              | 0              | 0              | 0                 | 0          | 0.0%       | 3.2%           | 0.0%           | 0.0%           | 0.0%           | 0.0% | 0.0% | 0.0% |
| tr I3LBi4 I3LBi4         | 1             | 0          | 0          | 0              | 0              | 0              | 0              | 0              | 1          | 0          | 0              | 0              | 0              | 0              | 0                 | 0          | 4.9%       | 0.0%           | 0.0%           | 0.0%           | 0.0%           | 0.0% | 0.0% | 0.0% |
| tr F1RGW6 F1RGW6         | 1             | 0          | 0          | 0              | 0              | 0              | 0              | 0              | 1          | 0          | 0              | 0              | 0              | 0              | 0                 | 0          | 1.5%       | 0.0%           | 0.0%           | 0.0%           | 0.0%           | 0.0% | 0.0% | 0.0% |
| tr I3LD55 I3LD55         | 1             | 0          | 0          | 0              | 0              | 0              | 0              | 0              | 1          | 0          | 0              | 0              | 0              | 0              | 0                 | 0          | 2.4%       | 0.0%           | 0.0%           | 0.0%           | 0.0%           | 0.0% | 0.0% | 0.0% |
| tr F1SS60 F1SS60         | 0             | 1          | 0          | 0              | 0              | 0              | 0              | 0              | 0          | 1          | 0              | 0              | 0              | 0              | 0                 | 0          | 0.0%       | 5.6%           | 0.0%           | 0.0%           | 0.0%           | 0.0% | 0.0% | 0.0% |
| tr F1RG00 F1RG00         | 0             | 1          | 0          | 0              | 0              | 0              | 0              | 0              | 0          | 1          | 0              | 0              | 0              | 0              | 0                 | 0          | 0.0%       | 6.0%           | 0.0%           | 0.0%           | 0.0%           | 0.0% | 0.0% | 0.0% |
| tr I3LN07 I3LN07         | 1             | 0          | 0          | 0              | 0              | 0              | 0              | 0              | 1          | 0          | 0              | 0              | 0              | 0              | 0                 | 0          | 1.1%       | 0.0%           | 0.0%           | 0.0%           | 0.0%           | 0.0% | 0.0% | 0.0% |
| tr F1SHF7 F1SHF7         | 0             | 1          | 0          | 0              | 0              | 0              | 0              | 0              | 0          | 1          | 0              | 0              | 0              | 0              | 0                 | 0          | 0.0%       | 0.6%           | 0.0%           | 0.0%           | 0.0%           | 0.0% | 0.0% | 0.0% |
| tr F1RFN6 F1RFN6         | 1             | 0          | 0          | 0              | 0              | 0              | 0              | 0              | 1          | 0          | 0              | 0              | 0              | 0              | 0                 | 0          | 1.6%       | 0.0%           | 0.0%           | 0.0%           | 0.0%           | 0.0% | 0.0% | 0.0% |
| tr I3LIA9 I3LIA9         | 1             | 0          | 0          | 0              | 0              | 0              | 0              | 0              | 1          | 0          | 0              | 0              | 0              | 0              | 0                 | 0          | 20.5%      | 0.0%           | 0.0%           | 0.0%           | 0.0%           | 0.0% | 0.0% | 0.0% |
| tr I3LKA2 I3LKA2         | 1             | 0          | 0          | 0              | 0              | 0              | 0              | 0              | 1          | 0          | 0              | 0              | 0              | 0              | 0                 | 0          | 5.6%       | 0.0%           | 0.0%           | 0.0%           | 0.0%           | 0.0% | 0.0% | 0.0% |
| Q08353                   | 0             | 1          | 0          | 0              | 0              | 0              | 0              | 0              | 0          | 1          | 0              | 0              | 0              | 0              | 0                 | 0          | 0.0%       | 6.4%           | 0.0%           | 0.0%           | 0.0%           | 0.0% | 0.0% | 0.0% |
| tr F1S3Z2 F1S3Z2         | 1             | 0          | 0          | 0              | 0              | 0              | 0              | 0              | 1          | 0          | 0              | 0              | 0              | 0              | 0                 | 0          | 4.4%       | 0.0%           | 0.0%           | 0.0%           | 0.0%           | 0.0% | 0.0% | 0.0% |
| tr F1S2T4 F1S2T4         | 0             | 1          | 0          | 0              | 0              | 0              | 0              | 0              | 0          | 1          | 0              | 0              | 0              | 0              | 0                 | 0          | 0.0%       | 1.3%           | 0.0%           | 0.0%           | 0.0%           | 0.0% | 0.0% | 0.0% |
| tr I3LU03 I3LU03         | 1             | 0          | 0          | 0              | 0              | 0              | 0              | 0              | 1          | 0          | 0              | 0              | 0              | 0              | 0                 | 0          | 7.9%       | 0.0%           | 0.0%           | 0.0%           | 0.0%           | 0.0% | 0.0% | 0.0% |
| tr I3LIC8 I3LIC8         | 1             | 0          | 0          | 0              | 0              | 0              | 0              | 0              | 1          | 0          | 0              | 0              | 0              | 0              | 0                 | 0          | 5.6%       | 0.0%           | 0.0%           | 0.0%           | 0.0%           | 0.0% | 0.0% | 0.0% |
| tr F1S1W5 F1S1W5         | 1             | 0          | 0          | 0              | 0              | 0              | 0              | 0              | 1          | 0          | 0              | 0              | 0              | 0              | 0                 | 0          | 8.9%       | 0.0%           | 0.0%           | 0.0%           | 0.0%           | 0.0% | 0.0% | 0.0% |
| tr I3LIJ4 I3LIJ4         | 1             | 0          | 0          | 0              | 0              | 0              | 0              | 0              | 1          | 0          | 0              | 0              | 0              | 0              | 0                 | 0          | 2.1%       | 0.0%           | 0.0%           | 0.0%           | 0.0%           | 0.0% | 0.0% | 0.0% |
| tr F1RQX0 F1RQX0         | 0             | 1          | 0          | 0              | 0              | 0              | 0              | 0              | 0          | 1          | 0              | 0              | 0              | 0              | 0                 | 0          | 0.0%       | 0.9%           | 0.0%           | 0.0%           | 0.0%           | 0.0% | 0.0% | 0.0% |
| tr I3LIU7 I3LIU7         | 1             | 0          | 0          | 0              | 0              | 0              | 0              | 0              | 1          | 0          | 0              | 0              | 0              | 0              | 0                 | 0          | 4.8%       | 0.0%           | 0.0%           | 0.0%           | 0.0%           | 0.0% | 0.0% | 0.0% |
| O13010                   | 0             | 1          | 0          | 0              | 0              | 0              | 0              | 0              | 0          | 1          | 0              | 0              | 0              | 0              | 0                 | 0          | 0.0%       | 2.5%           | 0.0%           | 0.0%           | 0.0%           | 0.0% | 0.0% | 0.0% |
| Reverse_tr F1S8Y0 F1S8Y0 | 1             | 0          | 0          | 0              | 0              | 0              | 0              | 0              | 1          | 0          | 0              | 0              | 0              | 0              | 0                 | 0          | 5.4%       | 0.0%           | 0.0%           | 0.0%           | 0.0%           | 0.0% | 0.0% | 0.0% |
| tr F1S786 F1S786         | 1             | 0          | 0          | 0              | 0              | 0              | 0              | 0              | 1          | 0          | 0              | 0              | 0              | 0              | 0                 | 0          | 3.6%       | 0.0%           | 0.0%           | 0.0%           | 0.0%           | 0.0% | 0.0% | 0.0% |
| tr I3L7R7 I3L7R7         | 1             | 0          | 0          | 0              | 0              | 0              | 0              | 0              | 1          | 0          | 0              | 0              | 0              | 0              | 0                 | 0          | 3.7%       | 0.0%           | 0.0%           | 0.0%           | 0.0%           | 0.0% | 0.0% | 0.0% |
| tr I3L837 I3L837         | 1             | 0          | 0          | 0              | 0              | 0              | 0              | 0              | 1          | 0          | 0              | 0              | 0              | 0              | 0                 | 0          | 2.8%       | 0.0%           | 0.0%           | 0.0%           | 0.0%           | 0.0% | 0.0% | 0.0% |
| tr I3LLV0 I3LLV0         | 0             | 1          | 0          | 0              | 0              | 0              | 0              | 0              | 0          | 1          | 0              | 0              | 0              | 0              | 0                 | 0          | 0.0%       | 6.0%           | 0.0%           | 0.0%           | 0.0%           | 0.0% | 0.0% | 0.0% |
| tr I3LA22 I3LA22         | 1             | 0          | 0          | 0              | 0              | 0              | 0              | 0              | 1          | 0          | 0              | 0              | 0              | 0              | 0                 | 0          | 6.5%       | 0.0%           | 0.0%           | 0.0%           | 0.0%           | 0.0% | 0.0% | 0.0% |
| tr F1RSZ7 F1RSZ7         | 1             | 0          | 0          | 0              | 0              | 0              | 0              | 0              | 1          | 0          | 0              | 0              | 0              | 0              | 0                 | 0          | 5.2%       | 0.0%           | 0.0%           | 0.0%           | 0.0%           | 0.0% | 0.0% | 0.0% |
| tr K7GNT3 K7GNT3         | 1             | 0          | 0          | 0              | 0              | 0              | 0              | 0              | 1          | 0          | 0              | 0              | 0              | 0              | 0                 | 0          | 3.4%       | 0.0%           | 0.0%           | 0.0%           | 0.0%           | 0.0% | 0.0% | 0.0% |
| tr F1SGV5 F1SGV5         | 1             | 0          | 0          | 0              | 0              | 0              | 0              | 0              | 1          | 0          | 0              | 0              | 0              | 0              | 0                 | 0          | 1.7%       | 0.0%           | 0.0%           | 0.0%           | 0.0%           | 0.0% | 0.0% | 0.0% |
| tr F1S9A8 F1S9A8         | 1             | 0          | 0          | 0              | 0              | 0              | 0              | 0              | 1          | 0          | 0              | 0              | 0              | 0              | 0                 | 0          | 0.4%       | 0.0%           | 0.0%           | 0.0%           | 0.0%           | 0.0% | 0.0% | 0.0% |
| tr I3L7Q8 I3L7Q8         | 0             | 1          | 0          | 0              | 0              | 0              | 0              | 0              | 0          | 1          | 0              | 0              | 0              | 0              | 0                 | 0          | 0.0%       | 1.9%           | 0.0%           | 0.0%           | 0.0%           | 0.0% | 0.0% | 0.0% |
| tr K7GNB1 K7GNB1         | 1             | 0          | 0          | 0              | 0              | 0              | 0              | 0              | 1          | 0          | 0              | 0              | 0              | 0              | 0                 | 0          | 2.4%       | 0.0%           | 0.0%           | 0.0%           | 0.0%           | 0.0% | 0.0% | 0.0% |
| tr K7GNR1 K7GNR1         | 1             | 0          | 0          | 0              | 0              | 0              | 0              | 0              | 1          | 0          | 0              | 0              | 0              | 0              | 0                 | 0          | 2.4%       | 0.0%           | 0.0%           | 0.0%           | 0.0%           | 0.0% | 0.0% | 0.0% |
| Q864V5                   | 1             | 0          | 0          | 0              | 0              | 0              | 0              | 0              | 1          | 0          | 0              | 0              | 0              | 0              | 0                 | 0          | 6.9%       | 0.0%           | 0.0%           | 0.0%           | 0.0%           | 0.0% | 0.0% | 0.0% |
| tr F1SAW9 F1SAW9         | 1             | 0          | 0          | 0              | 0              | 0              | 0              | 0              | 1          | 0          | 0              | 0              | 0              | 0              | 0                 | 0          | 10.4%      | 0.0%           | 0.0%           | 0.0%           | 0.0%           | 0.0% | 0.0% | 0.0% |
| tr I3LUZ2 I3LUZ2         | 1             | 0          | 0          | 0              | 0              | 0              | 0              | 0              | 1          | 0          | 0              | 0              | 0              | 0              | 0                 | 0          | 10.2%      | 0.0%           | 0.0%           | 0.0%           | 0.0%           | 0.0% | 0.0% | 0.0% |
| tr I3LRL0 I3LRL0         | 0             | 1          | 0          | 0              | 0              | 0              | 0              | 0              | 0          | 1          | 0              | 0              | 0              | 0              | 0                 | 0          | 0.0%       | 5.9%           | 0.0%           | 0.0%           | 0.0%           | 0.0% | 0.0% | 0.0% |
| tr I3LF91 I3LF91         | 1             | 0          | 0          | 0              | 0              | 0              | 0              | 0              | 1          | 0          | 0              | 0              | 0              | 0              | 0                 | 0          | 5.9%       | 0.0%           | 0.0%           | 0.0%           | 0.0%           | 0.0% | 0.0% | 0.0% |
| tr I3LB54 I3LB54         | 1             | 0          | 0          | 0              | 0              | 0              | 0              | 0              | 1          | 0          | 0              | 0              | 0              | 0              | 0                 | 0          | 21.4%      | 0.0%           | 0.0%           | 0.0%           | 0.0%           | 0.0% | 0.0% | 0.0% |
| tr F2Z4Z6 F2Z4Z6         | 0             | 1          | 0          | 0              | 0              | 0              | 0              | 0              | 0          | 1          | 0              | 0              | 0              | 0              | 0                 | 0          | 0.0%       | 2.1%           | 0.0%           | 0.0%           | 0.0%           | 0.0% | 0.0% | 0.0% |
| tr F1SRV6 F1SRV6         | 1             | 0          | 0          | 0              | 0              | 0              | 0              | 0              | 1          | 0          | 0              | 0              | 0              | 0              | 0                 | 0          | 6.6%       | 0.0%           | 0.0%           | 0.0%           | 0.0%           | 0.0% | 0.0% | 0.0% |
| Reverse_tr F1SG07 F1SG07 | 1             | 0          | 0          | 0              | 0              | 0              | 0              | 0              | 1          | 0          | 0              | 0              | 0              | 0              |                   |            |            |                |                |                |                |      |      |      |

| Sample#                  | Peptide Count    |            |            |                |                |                |                | Spectral Count |            |            |                |                |                |                | Sequence Coverage |            |            |                |                |                |                |      |      |      |
|--------------------------|------------------|------------|------------|----------------|----------------|----------------|----------------|----------------|------------|------------|----------------|----------------|----------------|----------------|-------------------|------------|------------|----------------|----------------|----------------|----------------|------|------|------|
|                          | Whole Cell       | Whole Cell | Whole Cell | Cilia Fraction | Cilia Fraction | Cilia Fraction | Cilia Fraction | Whole Cell     | Whole Cell | Whole Cell | Cilia Fraction | Cilia Fraction | Cilia Fraction | Cilia Fraction | Whole Cell        | Whole Cell | Whole Cell | Cilia Fraction | Cilia Fraction | Cilia Fraction | Cilia Fraction |      |      |      |
|                          | 1                | 2          | 6          | 4              | 3              | 5              | 7              | 8              | 1          | 2          | 6              | 4              | 3              | 5              | 7                 | 8          | 1          | 2              | 6              | 4              | 3              | 5    | 7    | 8    |
| Accession                |                  |            |            |                |                |                |                |                |            |            |                |                |                |                |                   |            |            |                |                |                |                |      |      |      |
| tr I3L626 I3L626         | 1                | 0          | 0          | 0              | 0              | 0              | 0              | 0              | 1          | 0          | 0              | 0              | 0              | 0              | 0                 | 0          | 5.2%       | 0.0%           | 0.0%           | 0.0%           | 0.0%           | 0.0% | 0.0% | 0.0% |
| tr I3LN95 I3LN95         | 0                | 1          | 0          | 0              | 0              | 0              | 0              | 0              | 0          | 1          | 0              | 0              | 0              | 0              | 0                 | 0          | 0.0%       | 1.9%           | 0.0%           | 0.0%           | 0.0%           | 0.0% | 0.0% | 0.0% |
| tr F1SS98 F1SS98         | 1                | 0          | 0          | 0              | 0              | 0              | 0              | 0              | 1          | 0          | 0              | 0              | 0              | 0              | 0                 | 0          | 8.1%       | 0.0%           | 0.0%           | 0.0%           | 0.0%           | 0.0% | 0.0% | 0.0% |
| tr F1RQE2 F1RQE2         | 1                | 0          | 0          | 0              | 0              | 0              | 0              | 0              | 1          | 0          | 0              | 0              | 0              | 0              | 0                 | 0          | 3.1%       | 0.0%           | 0.0%           | 0.0%           | 0.0%           | 0.0% | 0.0% | 0.0% |
| tr K7GQ49 K7GQ49         | 0                | 1          | 0          | 0              | 0              | 0              | 0              | 0              | 0          | 1          | 0              | 0              | 0              | 0              | 0                 | 0          | 0.0%       | 10.6%          | 0.0%           | 0.0%           | 0.0%           | 0.0% | 0.0% | 0.0% |
| tr K7GN81 K7GN81         | 0                | 1          | 0          | 0              | 0              | 0              | 0              | 0              | 0          | 1          | 0              | 0              | 0              | 0              | 0                 | 0          | 0.0%       | 4.6%           | 0.0%           | 0.0%           | 0.0%           | 0.0% | 0.0% | 0.0% |
| tr I3LNY6 I3LNY6         | 1                | 0          | 0          | 0              | 0              | 0              | 0              | 0              | 1          | 0          | 0              | 0              | 0              | 0              | 0                 | 0          | 0.9%       | 0.0%           | 0.0%           | 0.0%           | 0.0%           | 0.0% | 0.0% | 0.0% |
| tr I3LM88 I3LM88         | 1                | 0          | 0          | 0              | 0              | 0              | 0              | 0              | 1          | 0          | 0              | 0              | 0              | 0              | 0                 | 0          | 2.0%       | 0.0%           | 0.0%           | 0.0%           | 0.0%           | 0.0% | 0.0% | 0.0% |
| tr F1SLT9 F1SLT9         | 0                | 1          | 0          | 0              | 0              | 0              | 0              | 0              | 0          | 1          | 0              | 0              | 0              | 0              | 0                 | 0          | 0.0%       | 13.2%          | 0.0%           | 0.0%           | 0.0%           | 0.0% | 0.0% | 0.0% |
| tr I3LCU8 I3LCU8         | 1                | 0          | 0          | 0              | 0              | 0              | 0              | 0              | 1          | 0          | 0              | 0              | 0              | 0              | 0                 | 0          | 12.0%      | 0.0%           | 0.0%           | 0.0%           | 0.0%           | 0.0% | 0.0% | 0.0% |
| tr F1RG19 F1RG19         | 1                | 0          | 0          | 0              | 0              | 0              | 0              | 0              | 1          | 0          | 0              | 0              | 0              | 0              | 0                 | 0          | 6.4%       | 0.0%           | 0.0%           | 0.0%           | 0.0%           | 0.0% | 0.0% | 0.0% |
| tr F1S074 F1S074         | 0                | 1          | 0          | 0              | 0              | 0              | 0              | 0              | 0          | 1          | 0              | 0              | 0              | 0              | 0                 | 0          | 0.0%       | 1.2%           | 0.0%           | 0.0%           | 0.0%           | 0.0% | 0.0% | 0.0% |
| tr I3LPK4 I3LPK4         | 1                | 0          | 0          | 0              | 0              | 0              | 0              | 0              | 1          | 0          | 0              | 0              | 0              | 0              | 0                 | 0          | 4.1%       | 0.0%           | 0.0%           | 0.0%           | 0.0%           | 0.0% | 0.0% | 0.0% |
| tr I3L7M6 I3L7M6         | 1                | 0          | 0          | 0              | 0              | 0              | 0              | 0              | 1          | 0          | 0              | 0              | 0              | 0              | 0                 | 0          | 2.6%       | 0.0%           | 0.0%           | 0.0%           | 0.0%           | 0.0% | 0.0% | 0.0% |
| tr I3LN69 I3LN69         | 1                | 0          | 0          | 0              | 0              | 0              | 0              | 0              | 1          | 0          | 0              | 0              | 0              | 0              | 0                 | 0          | 9.1%       | 0.0%           | 0.0%           | 0.0%           | 0.0%           | 0.0% | 0.0% | 0.0% |
| tr F1RVC1 F1RVC1         | 0                | 1          | 0          | 0              | 0              | 0              | 0              | 0              | 0          | 1          | 0              | 0              | 0              | 0              | 0                 | 0          | 0.0%       | 2.9%           | 0.0%           | 0.0%           | 0.0%           | 0.0% | 0.0% | 0.0% |
| tr I3LUZ6 I3LUZ6         | 1                | 0          | 0          | 0              | 0              | 0              | 0              | 0              | 1          | 0          | 0              | 0              | 0              | 0              | 0                 | 0          | 3.8%       | 0.0%           | 0.0%           | 0.0%           | 0.0%           | 0.0% | 0.0% | 0.0% |
| tr F1SUB2 F1SUB2         | 1                | 0          | 0          | 0              | 0              | 0              | 0              | 0              | 1          | 0          | 0              | 0              | 0              | 0              | 0                 | 0          | 3.5%       | 0.0%           | 0.0%           | 0.0%           | 0.0%           | 0.0% | 0.0% | 0.0% |
| tr F1SDJ6 F1SDJ6         | 1                | 0          | 1          | 0              | 0              | 0              | 0              | 0              | 1          | 0          | 1              | 0              | 0              | 0              | 0                 | 0          | 1.3%       | 0.0%           | 1.0%           | 0.0%           | 0.0%           | 0.0% | 0.0% | 0.0% |
| tr F1RXA9 F1RXA9         | tr F1RXA9 F1RXA9 | 1          | 0          | 1              | 0              | 0              | 0              | 0              | 1          | 0          | 1              | 0              | 0              | 0              | 0                 | 0          | 1.6%       | 0.0%           | 1.5%           | 0.0%           | 0.0%           | 0.0% | 0.0% | 0.0% |
| tr I3LQC2 I3LQC2         | 1                | 0          | 1          | 0              | 0              | 0              | 0              | 0              | 1          | 0          | 1              | 0              | 0              | 0              | 0                 | 0          | 23.3%      | 0.0%           | 23.3%          | 0.0%           | 0.0%           | 0.0% | 0.0% | 0.0% |
| tr F1SGD0 F1SGD0         | 0                | 1          | 1          | 0              | 0              | 0              | 0              | 0              | 0          | 1          | 1              | 0              | 0              | 0              | 0                 | 0          | 0.0%       | 5.4%           | 2.9%           | 0.0%           | 0.0%           | 0.0% | 0.0% | 0.0% |
| tr F1S7T5 F1S7T5         | tr F1S7T5 F1S7T5 | 1          | 0          | 1              | 0              | 0              | 0              | 0              | 1          | 0          | 1              | 0              | 0              | 0              | 0                 | 0          | 3.9%       | 0.0%           | 4.5%           | 0.0%           | 0.0%           | 0.0% | 0.0% | 0.0% |
| tr F1SA47 F1SA47         | 1                | 0          | 1          | 0              | 0              | 0              | 0              | 0              | 1          | 0          | 1              | 0              | 0              | 0              | 0                 | 0          | 1.5%       | 0.0%           | 1.5%           | 0.0%           | 0.0%           | 0.0% | 0.0% | 0.0% |
| tr F1RFY3 F1RFY3         | 1                | 0          | 1          | 0              | 0              | 0              | 0              | 0              | 1          | 0          | 1              | 0              | 0              | 0              | 0                 | 0          | 12.8%      | 0.0%           | 5.7%           | 0.0%           | 0.0%           | 0.0% | 0.0% | 0.0% |
| tr K7GKB9 K7GKB9         | 1                | 0          | 1          | 0              | 0              | 0              | 0              | 0              | 1          | 0          | 1              | 0              | 0              | 0              | 0                 | 0          | 9.3%       | 0.0%           | 6.5%           | 0.0%           | 0.0%           | 0.0% | 0.0% | 0.0% |
| tr I3LB48 I3LB48         | 1                | 0          | 1          | 0              | 0              | 0              | 0              | 0              | 1          | 0          | 1              | 0              | 0              | 0              | 0                 | 0          | 12.9%      | 0.0%           | 12.9%          | 0.0%           | 0.0%           | 0.0% | 0.0% | 0.0% |
| tr Q2EN79 Q2EN79         | 1                | 0          | 1          | 0              | 0              | 0              | 0              | 0              | 1          | 0          | 1              | 0              | 0              | 0              | 0                 | 0          | 26.6%      | 0.0%           | 26.6%          | 0.0%           | 0.0%           | 0.0% | 0.0% | 0.0% |
| tr I3LUL3 I3LUL3         | 1                | 0          | 1          | 0              | 0              | 0              | 0              | 0              | 1          | 0          | 1              | 0              | 0              | 0              | 0                 | 0          | 14.8%      | 0.0%           | 46.3%          | 0.0%           | 0.0%           | 0.0% | 0.0% | 0.0% |
| tr F1RHC6 F1RHC6         | 1                | 0          | 1          | 0              | 0              | 0              | 0              | 0              | 1          | 0          | 1              | 0              | 0              | 0              | 0                 | 0          | 10.4%      | 0.0%           | 12.8%          | 0.0%           | 0.0%           | 0.0% | 0.0% | 0.0% |
| tr F1STE6 F1STE6         | 1                | 0          | 1          | 0              | 0              | 0              | 0              | 0              | 1          | 0          | 1              | 0              | 0              | 0              | 0                 | 0          | 10.2%      | 0.0%           | 9.7%           | 0.0%           | 0.0%           | 0.0% | 0.0% | 0.0% |
| tr F1SI71 F1SI71         | 1                | 0          | 1          | 0              | 0              | 0              | 0              | 0              | 1          | 0          | 1              | 0              | 0              | 0              | 0                 | 0          | 4.9%       | 0.0%           | 4.9%           | 0.0%           | 0.0%           | 0.0% | 0.0% | 0.0% |
| tr F1S4J0 F1S4J0         | 1                | 0          | 1          | 0              | 0              | 0              | 0              | 0              | 1          | 0          | 1              | 0              | 0              | 0              | 0                 | 0          | 3.6%       | 0.0%           | 3.6%           | 0.0%           | 0.0%           | 0.0% | 0.0% | 0.0% |
| tr K7GLQ5 K7GLQ5         | 1                | 0          | 1          | 0              | 0              | 0              | 0              | 0              | 1          | 0          | 1              | 0              | 0              | 0              | 0                 | 0          | 4.3%       | 0.0%           | 6.7%           | 0.0%           | 0.0%           | 0.0% | 0.0% | 0.0% |
| tr K7GL12 K7GL12         | 0                | 1          | 1          | 0              | 0              | 0              | 0              | 0              | 0          | 1          | 1              | 0              | 0              | 0              | 0                 | 0          | 0.0%       | 2.4%           | 1.9%           | 0.0%           | 0.0%           | 0.0% | 0.0% | 0.0% |
| tr F1SD01 F1SD01         | 1                | 0          | 1          | 0              | 0              | 0              | 0              | 0              | 1          | 0          | 1              | 0              | 0              | 0              | 0                 | 0          | 4.9%       | 0.0%           | 2.4%           | 0.0%           | 0.0%           | 0.0% | 0.0% | 0.0% |
| tr F1RKC7 F1RKC7         | 0                | 1          | 1          | 0              | 0              | 0              | 0              | 0              | 0          | 1          | 1              | 0              | 0              | 0              | 0                 | 0          | 0.0%       | 2.1%           | 3.3%           | 0.0%           | 0.0%           | 0.0% | 0.0% | 0.0% |
| tr F1RRG7 F1RRG7         | 0                | 1          | 1          | 0              | 0              | 0              | 0              | 0              | 0          | 1          | 1              | 0              | 0              | 0              | 0                 | 0          | 0.0%       | 2.2%           | 1.7%           | 0.0%           | 0.0%           | 0.0% | 0.0% | 0.0% |
| tr I3LKW6 I3LKW6         | 1                | 0          | 1          | 0              | 0              | 0              | 0              | 0              | 1          | 0          | 1              | 0              | 0              | 0              | 0                 | 0          | 7.9%       | 0.0%           | 13.3%          | 0.0%           | 0.0%           | 0.0% | 0.0% | 0.0% |
| tr F1RN66 F1RN66         | 1                | 0          | 1          | 0              | 0              | 0              | 0              | 0              | 1          | 0          | 1              | 0              | 0              | 0              | 0                 | 0          | 0.6%       | 0.0%           | 1.5%           | 0.0%           | 0.0%           | 0.0% | 0.0% | 0.0% |
| tr F1SEZ6 F1SEZ6         | 1                | 0          | 1          | 0              | 0              | 0              | 0              | 0              | 1          | 0          | 1              | 0              | 0              | 0              | 0                 | 0          | 3.6%       | 0.0%           | 3.2%           | 0.0%           | 0.0%           | 0.0% | 0.0% | 0.0% |
| tr F1SA28 F1SA28         | 1                | 0          | 1          | 0              | 0              | 0              | 0              | 0              | 1          | 0          | 1              | 0              | 0              | 0              | 0                 | 0          | 3.2%       | 0.0%           | 2.1%           | 0.0%           | 0.0%           | 0.0% | 0.0% | 0.0% |
| tr F1RFL4 F1RFL4         | 1                | 0          | 1          | 0              | 0              | 0              | 0              | 0              | 1          | 0          | 1              | 0              | 0              | 0              | 0                 | 0          | 5.7%       | 0.0%           | 3.0%           | 0.0%           | 0.0%           | 0.0% | 0.0% | 0.0% |
| tr I3LQ99 I3LQ99         | 1                | 0          | 1          | 0              | 0              | 0              | 0              | 0              | 1          | 0          | 1              | 0              | 0              | 0              | 0                 | 0          | 11.8%      | 0.0%           | 11.8%          | 0.0%           | 0.0%           | 0.0% | 0.0% | 0.0% |
| Reverse_tr F1SNR3 F1SNR3 | 0                | 1          | 1          | 0              | 0              | 0              | 0              | 0              | 0          | 1          | 1              | 0              | 0              | 0              | 0                 | 0          | 0.0%       | 0.7%           | 1.1%           | 0.0%           | 0.0%           | 0.0% | 0.0% | 0.0% |
| tr F1S8J8 F1S8J8         | 1                | 0          | 1          | 0              | 0              | 0              | 0              | 0              | 1          | 0          | 1              | 0              | 0              | 0              | 0                 | 0          | 2.7%       | 0.0%           | 3.3%           | 0.0%           | 0.0%           | 0.0% | 0.0% | 0.0% |
| tr I3LA04 I3LA04         | 1                | 0          | 1          | 0              | 0              | 0              | 0              | 0              | 1          | 0          | 1              | 0              | 0              | 0              | 0                 | 0          | 11.9%      | 0.0%           | 11.3%          | 0.0%           | 0.0%           | 0.0% | 0.0% | 0.0% |
| tr F1S4R1 F1S4R1         | 1                | 0          | 1          | 0              | 0              | 0              | 0              | 0              | 1          | 0          | 1              | 0              | 0              | 0              | 0                 | 0          | 5.4%       | 0.0%           | 2.4%           | 0.0%           | 0.0%           | 0.0% | 0.0% | 0.0% |
| tr F1SID1 F1SID1         | 1                | 0          | 1          | 0              | 0              | 0              | 0              | 0              | 1          | 0          | 1              | 0              | 0              | 0              | 0                 | 0          | 2.3%       | 0.0%           | 1.1%           | 0.0%           | 0.0%           | 0.0% | 0.0% | 0.0% |
| tr A5GFR8 A5GFR8         | 1                | 0          | 1          | 0              | 0              | 0              | 0              | 0              | 1          | 0          | 1              | 0              | 0              | 0              | 0                 | 0          | 4.8%       | 0.0%           | 5.5%           | 0.0%           | 0.0%           | 0.0% | 0.0% | 0.0% |
| tr F1S713 F1S713         | 1                | 0          | 1          | 0              | 0              | 0              | 0              | 0              | 1          | 0          | 1              | 0              | 0              | 0              | 0                 | 0          | 15.2%      | 0.0%           | 10.5%          | 0.0%           | 0.0%           | 0.0% | 0.0% | 0.0% |
| tr I3L6N4 I3L6N4         | 1                | 0          | 1          | 0              | 0              | 0              | 0              | 0              | 1          | 0          | 1              | 0              | 0              | 0              | 0                 | 0          | 0.6%       | 0.0%           | 1.5%           | 0.0%           | 0.0%           | 0.0% | 0.0% | 0.0% |
| tr K7GMT1 K7GMT1         | 0                | 1          | 1          | 0              | 0              | 0              | 0              | 0              | 0          | 1          | 1              | 0              | 0              | 0              | 0                 | 0          | 0.0%       | 2.5%           | 2.0%           | 0.0%           | 0.0%           | 0.0% | 0.0% | 0.0% |
| tr E9LK28 E9LK28         | 1                | 0          | 1          | 0              | 0              | 0              | 0              | 0              | 1          | 0          | 1              | 0              | 0              | 0              | 0                 | 0          | 3.4%       | 0.0%           | 5.4%           | 0.0%           | 0.0%           | 0.0% | 0.0% | 0.0% |
| tr I3LCW7 I3LCW7         | 1                | 0          | 1          | 0              | 0              | 0              | 0              | 0              | 1          | 0          | 1              | 0              | 0              | 0              | 0                 | 0          | 10.7%      | 0.0%           | 20.0%          | 0.0%           | 0.0%           | 0.0% | 0.0% | 0.0% |
| tr I3LDB2 I3LDB2         | 1                | 0          | 1          | 0              | 0              | 0              | 0              | 0              | 1          | 0          | 1              | 0              | 0              | 0              | 0                 | 0          | 3.5%       | 0.0%           | 7.6%           | 0.0%           | 0.0%           | 0.0% | 0.0% | 0.0% |
| tr I3LIS2 I3LIS2         | 1                | 0          | 1          | 0              | 0              | 0              | 0              | 0              | 1          | 0          | 1              | 0              | 0              | 0              | 0                 | 0          | 0.6%       | 0.0%           | 1.5%           | 0.0%           | 0.0%           | 0.0% | 0.0% | 0.0% |
| tr F1RXB3 F1RXB3         | 1                | 0          | 1          | 0              | 0              | 0              | 0              | 0              | 1          | 0          | 1              | 0              | 0              | 0              | 0                 | 0          | 1.6%       | 0.0%           | 1.5%           | 0.0%           | 0.0%           | 0.0% | 0.0% | 0.0% |
| tr F1S549 F1S549         | 1                | 0          | 1          | 0              | 0              | 0              | 0              | 0              | 1          | 0          | 1              | 0              | 0              | 0              | 0                 | 0          | 6.7%       | 0.0%           | 6.5%           | 0.0%           | 0.0%           | 0.0% | 0.0% | 0.0% |
| tr J9JIK5 J9JIK5         | 1                | 0          | 1          | 0              | 0              | 0              | 0              | 0              | 1          | 0          | 1              | 0              | 0              | 0              | 0                 | 0          | 18.1%      | 0.0%           | 6.2%           | 0.0%           | 0.0%           | 0.0% | 0.0% | 0.0% |
| tr F1SPI0 F1SPI0         | 1                | 0          | 1          | 0              | 0              | 0              | 0              | 0              | 1          | 0          | 1              | 0              | 0              | 0              | 0                 | 0          | 16.7%      | 0.0%           | 13.0%          | 0.0%           | 0.0%           | 0.0% | 0.0% | 0.0% |
| tr A5Gfq7 A5Gfq7         | 0                | 1          | 1          | 0              | 0              | 0              | 0              | 0              | 0          | 1          | 1              | 0              | 0              | 0              | 0                 | 0          | 0.0%       | 1.5%           | 2.7%           | 0.0%           | 0.0%           | 0.0% | 0.0% | 0.0% |
| tr I3LDE4 I3LDE4         | 1                | 0          | 1          | 0              | 0              | 0              | 0              | 0              | 1          | 0          | 1              | 0              | 0              | 0              | 0                 | 0          | 6.6%       | 0.0%           | 6.3%           | 0.0%           | 0.0%           | 0.0% | 0.0% | 0.0% |
| tr F1RG29 F1RG29         | 1                | 0          | 1          | 0              | 0              |                |                |                |            |            |                |                |                |                |                   |            |            |                |                |                |                |      |      |      |

| Accession        | Sample# | Peptide Count |            |            |                |                |                |                | Spectral Count |            |            |                |                |                |                | Sequence Coverage |            |            |                |                |                |                |      |
|------------------|---------|---------------|------------|------------|----------------|----------------|----------------|----------------|----------------|------------|------------|----------------|----------------|----------------|----------------|-------------------|------------|------------|----------------|----------------|----------------|----------------|------|
|                  |         | Whole Cell    | Whole Cell | Whole Cell | Cilia Fraction | Cilia Fraction | Cilia Fraction | Cilia Fraction | Whole Cell     | Whole Cell | Whole Cell | Cilia Fraction | Cilia Fraction | Cilia Fraction | Cilia Fraction | Whole Cell        | Whole Cell | Whole Cell | Cilia Fraction | Cilia Fraction | Cilia Fraction | Cilia Fraction |      |
|                  |         | 1             | 2          | 6          | 4              | 3              | 5              | 7              | 1              | 2          | 6          | 4              | 3              | 5              | 7              | 1                 | 2          | 6          | 4              | 3              | 5              | 7              | 8    |
| tr I3LV12 I3LV12 |         | 1             | 0          | 1          | 0              | 0              | 0              | 0              | 1              | 0          | 2          | 0              | 0              | 0              | 0              | 7.5%              | 0.0%       | 7.5%       | 0.0%           | 0.0%           | 0.0%           | 0.0%           | 0.0% |
| tr A5D9P5 A5D9P5 |         | 1             | 0          | 2          | 0              | 0              | 0              | 0              | 1              | 0          | 2          | 0              | 0              | 0              | 0              | 2.2%              | 0.0%       | 5.3%       | 0.0%           | 0.0%           | 0.0%           | 0.0%           | 0.0% |
| Q8MI68           |         | 1             | 0          | 1          | 0              | 0              | 0              | 0              | 1              | 0          | 2          | 0              | 0              | 0              | 0              | 2.9%              | 0.0%       | 3.2%       | 0.0%           | 0.0%           | 0.0%           | 0.0%           | 0.0% |
| tr F1RZT5 F1RZT5 |         | 0             | 1          | 1          | 0              | 0              | 0              | 0              | 0              | 1          | 2          | 0              | 0              | 0              | 0              | 0.0%              | 1.5%       | 2.8%       | 0.0%           | 0.0%           | 0.0%           | 0.0%           | 0.0% |
| tr I3LIU9 I3LIU9 |         | 1             | 0          | 1          | 0              | 0              | 0              | 0              | 1              | 0          | 2          | 0              | 0              | 0              | 0              | 16.2%             | 0.0%       | 11.5%      | 0.0%           | 0.0%           | 0.0%           | 0.0%           | 0.0% |
| tr F1RSM4 F1RSM4 |         | 1             | 0          | 1          | 0              | 0              | 0              | 0              | 1              | 0          | 2          | 0              | 0              | 0              | 0              | 5.7%              | 0.0%       | 3.4%       | 0.0%           | 0.0%           | 0.0%           | 0.0%           | 0.0% |
| tr I3LN18 I3LN18 |         | 1             | 0          | 1          | 0              | 0              | 0              | 0              | 1              | 0          | 2          | 0              | 0              | 0              | 0              | 3.0%              | 0.0%       | 2.4%       | 0.0%           | 0.0%           | 0.0%           | 0.0%           | 0.0% |
| tr F1RUT8 F1RUT8 |         | 1             | 0          | 1          | 0              | 0              | 0              | 0              | 1              | 0          | 2          | 0              | 0              | 0              | 0              | 3.3%              | 0.0%       | 2.8%       | 0.0%           | 0.0%           | 0.0%           | 0.0%           | 0.0% |
| tr I3LIW1 I3LIW1 |         | 1             | 0          | 1          | 0              | 0              | 0              | 0              | 1              | 0          | 2          | 0              | 0              | 0              | 0              | 2.2%              | 0.0%       | 4.4%       | 0.0%           | 0.0%           | 0.0%           | 0.0%           | 0.0% |
| tr F2Z5Q9 F2Z5Q9 |         | 1             | 0          | 1          | 0              | 0              | 0              | 0              | 1              | 0          | 2          | 0              | 0              | 0              | 0              | 15.4%             | 0.0%       | 10.9%      | 0.0%           | 0.0%           | 0.0%           | 0.0%           | 0.0% |
| tr F1RTN1 F1RTN1 |         | 1             | 0          | 1          | 0              | 0              | 0              | 0              | 1              | 0          | 2          | 0              | 0              | 0              | 0              | 2.1%              | 0.0%       | 2.2%       | 0.0%           | 0.0%           | 0.0%           | 0.0%           | 0.0% |
| tr F1RUE0 F1RUE0 |         | 0             | 1          | 1          | 0              | 0              | 0              | 0              | 0              | 1          | 2          | 0              | 0              | 0              | 0              | 0.0%              | 15.8%      | 12.3%      | 0.0%           | 0.0%           | 0.0%           | 0.0%           | 0.0% |
| tr F2Z530 F2Z530 |         | 1             | 0          | 1          | 0              | 0              | 0              | 0              | 1              | 0          | 2          | 0              | 0              | 0              | 0              | 4.8%              | 0.0%       | 6.0%       | 0.0%           | 0.0%           | 0.0%           | 0.0%           | 0.0% |
| tr F1ST39 F1ST39 |         | 0             | 1          | 1          | 0              | 0              | 0              | 0              | 0              | 1          | 2          | 0              | 0              | 0              | 0              | 0.0%              | 1.8%       | 4.2%       | 0.0%           | 0.0%           | 0.0%           | 0.0%           | 0.0% |
| tr A5D9P3 A5D9P3 |         | 1             | 0          | 2          | 0              | 0              | 0              | 0              | 1              | 0          | 2          | 0              | 0              | 0              | 0              | 1.7%              | 0.0%       | 4.1%       | 0.0%           | 0.0%           | 0.0%           | 0.0%           | 0.0% |
| tr F1S3R5 F1S3R5 |         | 1             | 0          | 1          | 0              | 0              | 0              | 0              | 1              | 0          | 2          | 0              | 0              | 0              | 0              | 2.6%              | 0.0%       | 5.2%       | 0.0%           | 0.0%           | 0.0%           | 0.0%           | 0.0% |
| tr F1SMW5 F1SMW5 |         | 0             | 1          | 1          | 0              | 0              | 0              | 0              | 0              | 1          | 2          | 0              | 0              | 0              | 0              | 0.0%              | 4.2%       | 4.8%       | 0.0%           | 0.0%           | 0.0%           | 0.0%           | 0.0% |
| tr F1SSB8 F1SSB8 |         | 0             | 1          | 1          | 0              | 0              | 0              | 0              | 0              | 1          | 3          | 0              | 0              | 0              | 0              | 0.0%              | 1.4%       | 2.6%       | 0.0%           | 0.0%           | 0.0%           | 0.0%           | 0.0% |
| tr F1RRJ1 F1RRJ1 |         | 0             | 1          | 1          | 0              | 0              | 0              | 0              | 0              | 1          | 3          | 0              | 0              | 0              | 0              | 0.0%              | 2.3%       | 3.1%       | 0.0%           | 0.0%           | 0.0%           | 0.0%           | 0.0% |
| tr F1RG56 F1RG56 |         | 1             | 0          | 1          | 0              | 0              | 0              | 0              | 1              | 0          | 3          | 0              | 0              | 0              | 0              | 2.4%              | 0.0%       | 5.8%       | 0.0%           | 0.0%           | 0.0%           | 0.0%           | 0.0% |
| tr I3LLG4 I3LLG4 |         | 0             | 1          | 1          | 0              | 0              | 0              | 0              | 0              | 1          | 3          | 0              | 0              | 0              | 0              | 0.0%              | 7.4%       | 3.4%       | 0.0%           | 0.0%           | 0.0%           | 0.0%           | 0.0% |
| tr K7GN28 K7GN28 |         | 1             | 0          | 1          | 0              | 0              | 0              | 0              | 1              | 0          | 3          | 0              | 0              | 0              | 0              | 6.0%              | 0.0%       | 10.9%      | 0.0%           | 0.0%           | 0.0%           | 0.0%           | 0.0% |
| tr F1S3K4 F1S3K4 |         | 1             | 0          | 1          | 0              | 0              | 0              | 0              | 1              | 0          | 3          | 0              | 0              | 0              | 0              | 5.9%              | 0.0%       | 10.8%      | 0.0%           | 0.0%           | 0.0%           | 0.0%           | 0.0% |
| tr I3LLA0 I3LLA0 |         | 1             | 0          | 1          | 0              | 0              | 0              | 0              | 1              | 0          | 3          | 0              | 0              | 0              | 0              | 3.3%              | 0.0%       | 3.5%       | 0.0%           | 0.0%           | 0.0%           | 0.0%           | 0.0% |
| tr I3L825 I3L825 |         | 1             | 0          | 1          | 0              | 0              | 0              | 0              | 1              | 0          | 3          | 0              | 0              | 0              | 0              | 0.4%              | 0.0%       | 7.3%       | 0.0%           | 0.0%           | 0.0%           | 0.0%           | 0.0% |
| tr F1SCJ2 F1SCJ2 |         | 0             | 1          | 1          | 0              | 0              | 0              | 0              | 0              | 1          | 3          | 0              | 0              | 0              | 0              | 0.0%              | 1.2%       | 1.5%       | 0.0%           | 0.0%           | 0.0%           | 0.0%           | 0.0% |
| tr F1SUU7 F1SUU7 |         | 1             | 0          | 1          | 0              | 0              | 0              | 0              | 1              | 0          | 3          | 0              | 0              | 0              | 0              | 3.5%              | 0.0%       | 7.0%       | 0.0%           | 0.0%           | 0.0%           | 0.0%           | 0.0% |
| tr F1RRL4 F1RRL4 |         | 0             | 1          | 1          | 0              | 0              | 0              | 0              | 0              | 1          | 3          | 0              | 0              | 0              | 0              | 0.0%              | 2.4%       | 3.2%       | 0.0%           | 0.0%           | 0.0%           | 0.0%           | 0.0% |
| tr I3LIP6 I3LIP6 |         | 1             | 0          | 1          | 0              | 0              | 0              | 0              | 1              | 0          | 3          | 0              | 0              | 0              | 0              | 2.8%              | 0.0%       | 3.7%       | 0.0%           | 0.0%           | 0.0%           | 0.0%           | 0.0% |
| tr F1RUC5 F1RUC5 |         | 1             | 0          | 1          | 0              | 0              | 0              | 0              | 1              | 0          | 3          | 0              | 0              | 0              | 0              | 1.7%              | 0.0%       | 2.2%       | 0.0%           | 0.0%           | 0.0%           | 0.0%           | 0.0% |
| tr F1S4A6 F1S4A6 |         | 1             | 0          | 1          | 0              | 0              | 0              | 0              | 1              | 0          | 3          | 0              | 0              | 0              | 0              | 8.3%              | 0.0%       | 8.3%       | 0.0%           | 0.0%           | 0.0%           | 0.0%           | 0.0% |
| tr F1S852 F1S852 |         | 1             | 0          | 1          | 0              | 0              | 0              | 0              | 1              | 0          | 3          | 0              | 0              | 0              | 0              | 6.2%              | 0.0%       | 6.2%       | 0.0%           | 0.0%           | 0.0%           | 0.0%           | 0.0% |
| tr K7GKV9 K7GKV9 |         | 1             | 0          | 1          | 0              | 0              | 0              | 0              | 1              | 0          | 3          | 0              | 0              | 0              | 0              | 5.3%              | 0.0%       | 5.3%       | 0.0%           | 0.0%           | 0.0%           | 0.0%           | 0.0% |
| tr F1S1E0 F1S1E0 |         | 0             | 1          | 1          | 0              | 0              | 0              | 0              | 0              | 1          | 3          | 0              | 0              | 0              | 0              | 0.0%              | 2.6%       | 3.2%       | 0.0%           | 0.0%           | 0.0%           | 0.0%           | 0.0% |
| tr F1RQI0 F1RQI0 |         | 1             | 0          | 1          | 0              | 0              | 0              | 0              | 1              | 0          | 3          | 0              | 0              | 0              | 0              | 2.5%              | 0.0%       | 1.9%       | 0.0%           | 0.0%           | 0.0%           | 0.0%           | 0.0% |
| tr F1SEG4 F1SEG4 |         | 0             | 1          | 1          | 0              | 0              | 0              | 0              | 0              | 1          | 3          | 0              | 0              | 0              | 0              | 0.0%              | 2.5%       | 5.2%       | 0.0%           | 0.0%           | 0.0%           | 0.0%           | 0.0% |
| tr I3LPR4 I3LPR4 |         | 1             | 0          | 1          | 0              | 0              | 0              | 0              | 1              | 0          | 3          | 0              | 0              | 0              | 0              | 5.2%              | 0.0%       | 5.2%       | 0.0%           | 0.0%           | 0.0%           | 0.0%           | 0.0% |
| Q56P27           |         | 1             | 0          | 1          | 0              | 0              | 0              | 0              | 1              | 0          | 3          | 0              | 0              | 0              | 0              | 11.1%             | 0.0%       | 5.6%       | 0.0%           | 0.0%           | 0.0%           | 0.0%           | 0.0% |
| tr K7GQ41 K7GQ41 |         | 1             | 0          | 3          | 0              | 0              | 0              | 0              | 1              | 0          | 3          | 0              | 0              | 0              | 0              | 7.5%              | 0.0%       | 13.0%      | 0.0%           | 0.0%           | 0.0%           | 0.0%           | 0.0% |
| tr I3LGV4 I3LGV4 |         | 1             | 0          | 1          | 0              | 0              | 0              | 0              | 1              | 0          | 3          | 0              | 0              | 0              | 0              | 3.1%              | 0.0%       | 3.1%       | 0.0%           | 0.0%           | 0.0%           | 0.0%           | 0.0% |
| Q864R5           |         | 1             | 0          | 1          | 0              | 0              | 0              | 0              | 1              | 0          | 3          | 0              | 0              | 0              | 0              | 2.4%              | 0.0%       | 5.8%       | 0.0%           | 0.0%           | 0.0%           | 0.0%           | 0.0% |
| tr F1RGX0 F1RGX0 |         | 1             | 0          | 1          | 0              | 0              | 0              | 0              | 1              | 0          | 4          | 0              | 0              | 0              | 0              | 3.3%              | 0.0%       | 3.7%       | 0.0%           | 0.0%           | 0.0%           | 0.0%           | 0.0% |
| tr I3LEW6 I3LEW6 |         | 1             | 0          | 2          | 0              | 0              | 0              | 0              | 1              | 0          | 4          | 0              | 0              | 0              | 0              | 7.2%              | 0.0%       | 11.6%      | 0.0%           | 0.0%           | 0.0%           | 0.0%           | 0.0% |
| tr F1SS61 F1SS61 |         | 1             | 0          | 1          | 0              | 0              | 0              | 0              | 1              | 0          | 4          | 0              | 0              | 0              | 0              | 0.5%              | 0.0%       | 0.5%       | 0.0%           | 0.0%           | 0.0%           | 0.0%           | 0.0% |
| tr F1S9D6 F1S9D6 |         | 1             | 0          | 1          | 0              | 0              | 0              | 0              | 1              | 0          | 4          | 0              | 0              | 0              | 0              | 0.5%              | 0.0%       | 0.5%       | 0.0%           | 0.0%           | 0.0%           | 0.0%           | 0.0% |
| tr F1RGH8 F1RGH8 |         | 1             | 0          | 2          | 0              | 0              | 0              | 0              | 1              | 0          | 4          | 0              | 0              | 0              | 0              | 1.8%              | 0.0%       | 7.1%       | 0.0%           | 0.0%           | 0.0%           | 0.0%           | 0.0% |
| tr F1SS65 F1SS65 |         | 1             | 0          | 1          | 0              | 0              | 0              | 0              | 1              | 0          | 4          | 0              | 0              | 0              | 0              | 0.6%              | 0.0%       | 0.6%       | 0.0%           | 0.0%           | 0.0%           | 0.0%           | 0.0% |
| tr F1RRD7 F1RRD7 |         | 1             | 0          | 1          | 0              | 0              | 0              | 0              | 1              | 0          | 4          | 0              | 0              | 0              | 0              | 2.3%              | 0.0%       | 2.3%       | 0.0%           | 0.0%           | 0.0%           | 0.0%           | 0.0% |
| Q9TV61           |         | 1             | 0          | 1          | 0              | 0              | 0              | 0              | 1              | 0          | 4          | 0              | 0              | 0              | 0              | 0.5%              | 0.0%       | 0.5%       | 0.0%           | 0.0%           | 0.0%           | 0.0%           | 0.0% |
| Q9TV63           |         | 1             | 0          | 1          | 0              | 0              | 0              | 0              | 1              | 0          | 4          | 0              | 0              | 0              | 0              | 0.5%              | 0.0%       | 0.5%       | 0.0%           | 0.0%           | 0.0%           | 0.0%           | 0.0% |
| Q9TV62           |         | 1             | 0          | 1          | 0              | 0              | 0              | 0              | 1              | 0          | 4          | 0              | 0              | 0              | 0              | 0.5%              | 0.0%       | 0.5%       | 0.0%           | 0.0%           | 0.0%           | 0.0%           | 0.0% |
| tr F1SS62 F1SS62 |         | 1             | 0          | 1          | 0              | 0              | 0              | 0              | 1              | 0          | 4          | 0              | 0              | 0              | 0              | 0.6%              | 0.0%       | 0.6%       | 0.0%           | 0.0%           | 0.0%           | 0.0%           | 0.0% |
| P81271           |         | 1             | 0          | 1          | 0              | 0              | 0              | 0              | 1              | 0          | 4          | 0              | 0              | 0              | 0              | 13.8%             | 0.0%       | 13.8%      | 0.0%           | 0.0%           | 0.0%           | 0.0%           | 0.0% |
| tr F1SQA6 F1SQA6 |         | 1             | 0          | 2          | 0              | 0              | 0              | 0              | 1              | 0          | 4          | 0              | 0              | 0              | 0              | 3.4%              | 0.0%       | 7.8%       | 0.0%           | 0.0%           | 0.0%           | 0.0%           | 0.0% |
| P79293           |         | 1             | 0          | 1          | 0              | 0              | 0              | 0              | 1              | 0          | 4          | 0              | 0              | 0              | 0              | 0.5%              | 0.0%       | 0.5%       | 0.0%           | 0.0%           | 0.0%           | 0.0%           | 0.0% |
| tr F1RG17 F1RG17 |         | 1             | 0          | 1          | 0              | 0              | 0              | 0              | 1              | 0          | 4          | 0              | 0              | 0              | 0              | 11.2%             | 0.0%       | 10.0%      | 0.0%           | 0.0%           | 0.0%           | 0.0%           | 0.0% |
| Q27HK4           |         | 1             | 0          | 2          | 0              | 0              | 0              | 0              | 1              | 0          | 4          | 0              | 0              | 0              | 0              | 4.4%              | 0.0%       | 9.5%       | 0.0%           | 0.0%           | 0.0%           | 0.0%           | 0.0% |
| tr F1SF13 F1SF13 |         | 1             | 0          | 1          | 0              | 0              | 0              | 0              | 1              | 0          | 4          | 0              | 0              | 0              | 0              | 7.4%              | 0.0%       | 5.2%       | 0.0%           | 0.0%           | 0.0%           | 0.0%           | 0.0% |
| tr F1SS66 F1SS66 |         | 1             | 0          | 1          | 0              | 0              | 0              | 0              | 1              | 0          | 4          | 0              | 0              | 0              | 0              | 0.5%              | 0.0%       | 0.5%       | 0.0%           | 0.0%           | 0.0%           | 0.0%           | 0.0% |
| tr I3LIH0 I3LIH0 |         | 1             | 0          | 1          | 0              | 0              | 0              | 0              | 1              | 0          | 4          | 0              | 0              | 0              | 0              | 9.5%              | 0.0%       | 9.5%       | 0.0%           | 0.0%           | 0.0%           | 0.0%           | 0.0% |
| tr F1SN89 F1SN89 |         | 1             | 0          | 1          | 0              | 0              | 0              | 0              | 1              | 0          | 4          | 0              | 0              | 0              | 0              | 1.0%              | 0.0%       | 2.1%       | 0.0%           | 0.0%           | 0.0%           | 0.0%           | 0.0% |
| tr F1SNY4 F1SNY4 |         | 1             | 0          | 2          | 0              | 0              | 0              | 0              | 1              | 0          | 4          | 0              | 0              | 0              | 0              | 4.4%              | 0.0%       | 6.7%       | 0.0%           | 0.0%           | 0.0%           | 0.0%           | 0.0% |
| tr I3L897 I3L897 |         | 1             | 0          | 1          | 0              | 0              | 0              | 0              | 1              | 0          | 4          | 0              | 0              | 0              | 0              | 4.7%              | 0.0%       | 4.7%       | 0.0%           | 0.0%           | 0.0%           | 0.0%           | 0.0% |
| tr F1SLR6 F1SLR6 |         | 1             | 0          | 2          | 0              | 0              | 0              | 0              | 1              | 0          | 4          | 0              | 0              | 0              | 0              | 1.8%              | 0.0%       | 3.7%       | 0.0%           | 0.0%           | 0.0%           | 0.0%           | 0.0% |
| tr K7GLB8 K7GLB8 |         | 1             | 0          | 2          | 0              | 0              | 0              | 0              | 1              | 0          | 4          | 0              | 0              | 0              | 0              | 4.4%              | 0.0%       | 6.7%       | 0.0%           | 0.0%           | 0.0%           | 0.0%           | 0.0% |
| tr F1SS64 F1SS64 |         | 1             | 0          | 1          | 0              | 0              | 0              | 0              | 1              | 0          | 4          | 0              | 0              | 0              | 0              | 0.5%              | 0.0%       | 0.5%       | 0.0%           | 0.0%           | 0.0%           | 0.0%           | 0.0% |
| tr F1S4X7 F1S4X7 |         | 1             | 0          | 1          | 0              | 0              | 0              | 0              | 1              | 0          | 4          | 0              | 0              | 0              | 0              | 0.5%              | 0.0%       | 0.5%       | 0.0%           | 0.0%           | 0.0%           | 0.0%           | 0.0% |
| Q06AT9           |         | 1             | 0          | 2          | 0              | 0              | 0              | 0              | 1              | 0          | 4          | 0              | 0              | 0              |                |                   |            |            |                |                |                |                |      |

| Accession                | Sample# | Peptide Count |            |            |                |                |                |                | Spectral Count |            |            |                |                |                |                | Sequence Coverage |            |            |                |                |                |                |       |
|--------------------------|---------|---------------|------------|------------|----------------|----------------|----------------|----------------|----------------|------------|------------|----------------|----------------|----------------|----------------|-------------------|------------|------------|----------------|----------------|----------------|----------------|-------|
|                          |         | Whole Cell    | Whole Cell | Whole Cell | Cilia Fraction | Cilia Fraction | Cilia Fraction | Cilia Fraction | Whole Cell     | Whole Cell | Whole Cell | Cilia Fraction | Cilia Fraction | Cilia Fraction | Cilia Fraction | Whole Cell        | Whole Cell | Whole Cell | Cilia Fraction | Cilia Fraction | Cilia Fraction | Cilia Fraction |       |
|                          |         | 1             | 2          | 6          | 4              | 3              | 5              | 7              | 1              | 2          | 6          | 4              | 3              | 5              | 7              | 1                 | 2          | 6          | 4              | 3              | 5              | 7              | 8     |
| tr I3LTB0 I3LTB0         |         | 1             | 0          | 1          | 0              | 0              | 0              | 0              | 1              | 0          | 5          | 0              | 0              | 0              | 0              | 4.4%              | 0.0%       | 6.1%       | 0.0%           | 0.0%           | 0.0%           | 0.0%           | 0.0%  |
| tr F1ST04 F1ST04         |         | 1             | 0          | 2          | 0              | 0              | 0              | 0              | 1              | 0          | 6          | 0              | 0              | 0              | 0              | 1.8%              | 0.0%       | 1.8%       | 0.0%           | 0.0%           | 0.0%           | 0.0%           | 0.0%  |
| tr F1SRQ3 F1SRQ3         |         | 1             | 0          | 1          | 0              | 0              | 0              | 0              | 1              | 0          | 6          | 0              | 0              | 0              | 0              | 3.1%              | 0.0%       | 3.1%       | 0.0%           | 0.0%           | 0.0%           | 0.0%           | 0.0%  |
| tr I3LR95 I3LR95         |         | 1             | 0          | 1          | 0              | 0              | 0              | 0              | 1              | 0          | 6          | 0              | 0              | 0              | 0              | 19.2%             | 0.0%       | 19.2%      | 0.0%           | 0.0%           | 0.0%           | 0.0%           | 0.0%  |
| tr I3L723 I3L723         |         | 1             | 0          | 2          | 0              | 0              | 0              | 0              | 1              | 0          | 6          | 0              | 0              | 0              | 0              | 10.5%             | 0.0%       | 22.1%      | 0.0%           | 0.0%           | 0.0%           | 0.0%           | 0.0%  |
| tr F1RRJ4 F1RRJ4         |         | 1             | 0          | 1          | 0              | 0              | 0              | 0              | 1              | 0          | 6          | 0              | 0              | 0              | 0              | 6.0%              | 0.0%       | 6.0%       | 0.0%           | 0.0%           | 0.0%           | 0.0%           | 0.0%  |
| tr I3LCN6 I3LCN6         |         | 1             | 0          | 1          | 0              | 0              | 0              | 0              | 1              | 0          | 6          | 0              | 0              | 0              | 0              | 7.1%              | 0.0%       | 9.0%       | 0.0%           | 0.0%           | 0.0%           | 0.0%           | 0.0%  |
| tr F1S994 F1S994         |         | 1             | 0          | 2          | 0              | 0              | 0              | 0              | 1              | 0          | 6          | 0              | 0              | 0              | 0              | 12.7%             | 0.0%       | 12.7%      | 0.0%           | 0.0%           | 0.0%           | 0.0%           | 0.0%  |
| tr I3LRZ7 I3LRZ7         |         | 1             | 0          | 1          | 0              | 0              | 0              | 0              | 1              | 0          | 6          | 0              | 0              | 0              | 0              | 8.2%              | 0.0%       | 8.2%       | 0.0%           | 0.0%           | 0.0%           | 0.0%           | 0.0%  |
| O77591                   |         | 1             | 0          | 3          | 0              | 0              | 0              | 0              | 1              | 0          | 6          | 0              | 0              | 0              | 0              | 3.6%              | 0.0%       | 13.7%      | 0.0%           | 0.0%           | 0.0%           | 0.0%           | 0.0%  |
| tr I3LLA2 I3LLA2         |         | 0             | 1          | 1          | 0              | 0              | 0              | 0              | 0              | 1          | 6          | 0              | 0              | 0              | 0              | 0.0%              | 4.4%       | 11.8%      | 0.0%           | 0.0%           | 0.0%           | 0.0%           | 0.0%  |
| tr F1REW6 F1REW6         |         | 1             | 0          | 1          | 0              | 0              | 0              | 0              | 1              | 0          | 6          | 0              | 0              | 0              | 0              | 1.8%              | 0.0%       | 2.8%       | 0.0%           | 0.0%           | 0.0%           | 0.0%           | 0.0%  |
| tr F1RIU0 F1RIU0         |         | 1             | 0          | 1          | 0              | 0              | 0              | 0              | 1              | 0          | 6          | 0              | 0              | 0              | 0              | 22.3%             | 0.0%       | 22.3%      | 0.0%           | 0.0%           | 0.0%           | 0.0%           | 0.0%  |
| tr F1SG95 F1SG95         |         | 1             | 0          | 3          | 0              | 0              | 0              | 0              | 1              | 0          | 7          | 0              | 0              | 0              | 0              | 8.3%              | 0.0%       | 10.8%      | 0.0%           | 0.0%           | 0.0%           | 0.0%           | 0.0%  |
| tr F1SR88 F1SR88         |         | 1             | 0          | 1          | 0              | 0              | 0              | 0              | 1              | 0          | 7          | 0              | 0              | 0              | 0              | 2.4%              | 0.0%       | 4.6%       | 0.0%           | 0.0%           | 0.0%           | 0.0%           | 0.0%  |
| tr F1SED4 F1SED4         |         | 1             | 0          | 2          | 0              | 0              | 0              | 0              | 1              | 0          | 7          | 0              | 0              | 0              | 0              | 6.5%              | 0.0%       | 6.7%       | 0.0%           | 0.0%           | 0.0%           | 0.0%           | 0.0%  |
| tr F1SEJ0 F1SEJ0         |         | 1             | 0          | 1          | 0              | 0              | 0              | 0              | 1              | 0          | 7          | 0              | 0              | 0              | 0              | 4.7%              | 0.0%       | 4.7%       | 0.0%           | 0.0%           | 0.0%           | 0.0%           | 0.0%  |
| tr I3LJQ7 I3LJQ7         |         | 1             | 0          | 3          | 0              | 0              | 0              | 0              | 1              | 0          | 7          | 0              | 0              | 0              | 0              | 1.6%              | 0.0%       | 7.0%       | 0.0%           | 0.0%           | 0.0%           | 0.0%           | 0.0%  |
| P80230                   |         | 1             | 0          | 1          | 0              | 0              | 0              | 0              | 1              | 0          | 7          | 0              | 0              | 0              | 0              | 46.9%             | 0.0%       | 46.9%      | 0.0%           | 0.0%           | 0.0%           | 0.0%           | 0.0%  |
| tr F1REX8 F1REX8         |         | 1             | 0          | 2          | 0              | 0              | 0              | 0              | 1              | 0          | 8          | 0              | 0              | 0              | 0              | 2.3%              | 0.0%       | 2.2%       | 0.0%           | 0.0%           | 0.0%           | 0.0%           | 0.0%  |
| tr F1SA62 F1SA62         |         | 1             | 0          | 3          | 0              | 0              | 0              | 0              | 1              | 0          | 8          | 0              | 0              | 0              | 0              | 15.7%             | 0.0%       | 15.7%      | 0.0%           | 0.0%           | 0.0%           | 0.0%           | 0.0%  |
| tr K7GSK4 K7GSK4         |         | 1             | 0          | 1          | 0              | 0              | 0              | 0              | 1              | 0          | 8          | 0              | 0              | 0              | 0              | 10.8%             | 0.0%       | 10.8%      | 0.0%           | 0.0%           | 0.0%           | 0.0%           | 0.0%  |
| tr F1RWZ9 F1RWZ9         |         | 1             | 0          | 1          | 0              | 0              | 0              | 0              | 1              | 0          | 8          | 0              | 0              | 0              | 0              | 11.0%             | 0.0%       | 11.0%      | 0.0%           | 0.0%           | 0.0%           | 0.0%           | 0.0%  |
| tr I3L949 I3L949         |         | 1             | 0          | 2          | 0              | 0              | 0              | 0              | 1              | 0          | 8          | 0              | 0              | 0              | 0              | 4.3%              | 0.0%       | 8.4%       | 0.0%           | 0.0%           | 0.0%           | 0.0%           | 0.0%  |
| tr I3LHC7 I3LHC7         |         | 0             | 1          | 1          | 0              | 0              | 0              | 0              | 0              | 1          | 8          | 0              | 0              | 0              | 0              | 0.0%              | 2.5%       | 5.1%       | 0.0%           | 0.0%           | 0.0%           | 0.0%           | 0.0%  |
| tr F1SED8 F1SED8         |         | 1             | 0          | 3          | 0              | 0              | 0              | 0              | 1              | 0          | 9          | 0              | 0              | 0              | 0              | 1.9%              | 0.0%       | 5.3%       | 0.0%           | 0.0%           | 0.0%           | 0.0%           | 0.0%  |
| tr F1S7D6 F1S7D6         |         | 1             | 0          | 2          | 0              | 0              | 0              | 0              | 1              | 0          | 9          | 0              | 0              | 0              | 0              | 2.8%              | 0.0%       | 5.8%       | 0.0%           | 0.0%           | 0.0%           | 0.0%           | 0.0%  |
| tr I3LPF8 I3LPF8         |         | 1             | 0          | 3          | 0              | 0              | 0              | 0              | 1              | 0          | 9          | 0              | 0              | 0              | 0              | 2.3%              | 0.0%       | 4.2%       | 0.0%           | 0.0%           | 0.0%           | 0.0%           | 0.0%  |
| tr I3LMV8 I3LMV8         |         | 0             | 1          | 1          | 0              | 0              | 0              | 0              | 0              | 1          | 9          | 0              | 0              | 0              | 0              | 0.0%              | 1.1%       | 1.8%       | 0.0%           | 0.0%           | 0.0%           | 0.0%           | 0.0%  |
| tr F1SPH2 F1SPH2         |         | 1             | 0          | 2          | 0              | 0              | 0              | 0              | 1              | 0          | 10         | 0              | 0              | 0              | 0              | 6.2%              | 0.0%       | 3.1%       | 0.0%           | 0.0%           | 0.0%           | 0.0%           | 0.0%  |
| Q767K8                   |         | 1             | 0          | 1          | 0              | 0              | 0              | 0              | 1              | 0          | 10         | 0              | 0              | 0              | 0              | 3.9%              | 0.0%       | 13.6%      | 0.0%           | 0.0%           | 0.0%           | 0.0%           | 0.0%  |
| tr I3LCX9 I3LCX9         |         | 1             | 0          | 1          | 0              | 0              | 0              | 0              | 1              | 0          | 11         | 0              | 0              | 0              | 0              | 5.5%              | 0.0%       | 2.7%       | 0.0%           | 0.0%           | 0.0%           | 0.0%           | 0.0%  |
| tr F1RPE5 F1RPE5         |         | 1             | 0          | 1          | 0              | 0              | 0              | 0              | 1              | 0          | 11         | 0              | 0              | 0              | 0              | 5.4%              | 0.0%       | 2.7%       | 0.0%           | 0.0%           | 0.0%           | 0.0%           | 0.0%  |
| tr I3L6I8 I3L6I8         |         | 1             | 0          | 4          | 0              | 0              | 0              | 0              | 1              | 0          | 11         | 0              | 0              | 0              | 0              | 5.8%              | 0.0%       | 17.0%      | 0.0%           | 0.0%           | 0.0%           | 0.0%           | 0.0%  |
| tr F1SGC6 F1SGC6         |         | 1             | 0          | 3          | 0              | 0              | 0              | 0              | 1              | 0          | 11         | 0              | 0              | 0              | 0              | 7.9%              | 0.0%       | 12.2%      | 0.0%           | 0.0%           | 0.0%           | 0.0%           | 0.0%  |
| tr I3LXX8 I3LXX8         |         | 1             | 0          | 2          | 0              | 0              | 0              | 0              | 1              | 0          | 13         | 0              | 0              | 0              | 0              | 8.1%              | 0.0%       | 11.9%      | 0.0%           | 0.0%           | 0.0%           | 0.0%           | 0.0%  |
| tr F1SBU8 F1SBU8         |         | 0             | 1          | 3          | 0              | 0              | 0              | 0              | 0              | 1          | 13         | 0              | 0              | 0              | 0              | 0.0%              | 18.6%      | 39.8%      | 0.0%           | 0.0%           | 0.0%           | 0.0%           | 0.0%  |
| tr F1RXX7 F1RXX7         |         | 1             | 0          | 2          | 0              | 0              | 0              | 0              | 1              | 0          | 13         | 0              | 0              | 0              | 0              | 7.1%              | 0.0%       | 10.5%      | 0.0%           | 0.0%           | 0.0%           | 0.0%           | 0.0%  |
| tr I3LAS7 I3LAS7         |         | 1             | 0          | 2          | 0              | 0              | 0              | 0              | 1              | 0          | 13         | 0              | 0              | 0              | 0              | 8.4%              | 0.0%       | 12.4%      | 0.0%           | 0.0%           | 0.0%           | 0.0%           | 0.0%  |
| tr I3LDD0 I3LDD0         |         | 1             | 0          | 2          | 0              | 0              | 0              | 0              | 1              | 0          | 13         | 0              | 0              | 0              | 0              | 8.2%              | 0.0%       | 12.1%      | 0.0%           | 0.0%           | 0.0%           | 0.0%           | 0.0%  |
| tr F1SNF7 F1SNF7         |         | 1             | 0          | 1          | 0              | 0              | 0              | 0              | 1              | 0          | 13         | 0              | 0              | 0              | 0              | 3.4%              | 0.0%       | 4.4%       | 0.0%           | 0.0%           | 0.0%           | 0.0%           | 0.0%  |
| tr F1SSK4 F1SSK4         |         | 1             | 0          | 2          | 0              | 0              | 0              | 0              | 1              | 0          | 14         | 0              | 0              | 0              | 0              | 18.0%             | 0.0%       | 34.8%      | 0.0%           | 0.0%           | 0.0%           | 0.0%           | 0.0%  |
| tr I3LLT5 I3LLT5         |         | 1             | 0          | 4          | 0              | 0              | 0              | 0              | 1              | 0          | 14         | 0              | 0              | 0              | 0              | 5.5%              | 0.0%       | 9.2%       | 0.0%           | 0.0%           | 0.0%           | 0.0%           | 0.0%  |
| tr I3LIW3 I3LIW3         |         | 1             | 0          | 5          | 0              | 0              | 0              | 0              | 1              | 0          | 15         | 0              | 0              | 0              | 0              | 11.4%             | 0.0%       | 41.0%      | 0.0%           | 0.0%           | 0.0%           | 0.0%           | 0.0%  |
| tr I3LR30 I3LR30         |         | 1             | 0          | 1          | 0              | 0              | 0              | 0              | 1              | 0          | 16         | 0              | 0              | 0              | 0              | 19.2%             | 0.0%       | 19.2%      | 0.0%           | 0.0%           | 0.0%           | 0.0%           | 0.0%  |
| tr F1SF11 F1SF11         |         | 1             | 0          | 2          | 0              | 0              | 0              | 0              | 1              | 0          | 16         | 0              | 0              | 0              | 0              | 2.3%              | 0.0%       | 4.5%       | 0.0%           | 0.0%           | 0.0%           | 0.0%           | 0.0%  |
| tr F1SMF9 F1SMF9         |         | 1             | 0          | 2          | 0              | 0              | 0              | 0              | 1              | 0          | 17         | 0              | 0              | 0              | 0              | 5.6%              | 0.0%       | 11.9%      | 0.0%           | 0.0%           | 0.0%           | 0.0%           | 0.0%  |
| Q29228                   |         | 0             | 1          | 3          | 0              | 0              | 0              | 0              | 0              | 1          | 21         | 0              | 0              | 0              | 0              | 0.0%              | 13.0%      | 23.2%      | 0.0%           | 0.0%           | 0.0%           | 0.0%           | 0.0%  |
| tr F1S3H1 F1S3H1         |         | 1             | 0          | 3          | 0              | 0              | 0              | 0              | 1              | 0          | 25         | 0              | 0              | 0              | 0              | 1.7%              | 0.0%       | 10.3%      | 0.0%           | 0.0%           | 0.0%           | 0.0%           | 0.0%  |
| tr I3LU44 I3LU44         |         | 1             | 0          | 1          | 0              | 0              | 0              | 0              | 1              | 0          | 31         | 0              | 0              | 0              | 0              | 52.1%             | 0.0%       | 52.1%      | 0.0%           | 0.0%           | 0.0%           | 0.0%           | 0.0%  |
| tr F1S4V5 F1S4V5         |         | 1             | 0          | 2          | 0              | 0              | 0              | 0              | 1              | 0          | 33         | 0              | 0              | 0              | 0              | 2.3%              | 0.0%       | 3.4%       | 0.0%           | 0.0%           | 0.0%           | 0.0%           | 0.0%  |
| Reverse_tr F1RZ03 F1RZ03 |         | 1             | 0          | 1          | 0              | 0              | 0              | 0              | 1              | 0          | 41         | 0              | 0              | 0              | 0              | 1.2%              | 0.0%       | 1.2%       | 0.0%           | 0.0%           | 0.0%           | 0.0%           | 0.0%  |
| Reverse_tr I3LQZ3 I3LQZ3 |         | 1             | 0          | 1          | 0              | 0              | 0              | 0              | 1              | 0          | 41         | 0              | 0              | 0              | 0              | 1.0%              | 0.0%       | 1.0%       | 0.0%           | 0.0%           | 0.0%           | 0.0%           | 0.0%  |
| tr F1S7V1 F1S7V1         |         | 0             | 0          | 1          | 0              | 0              | 0              | 0              | 1              | 0          | 1          | 0              | 0              | 0              | 17             | 0.0%              | 0.0%       | 4.7%       | 0.0%           | 0.0%           | 0.0%           | 0.0%           | 5.8%  |
| tr F1RZV9 F1RZV9         |         | 0             | 0          | 1          | 0              | 0              | 0              | 1              | 8              | 0          | 2          | 0              | 0              | 0              | 2              | 29                | 0.0%       | 0.0%       | 4.5%           | 0.0%           | 0.0%           | 0.0%           | 6.8%  |
| tr F1S1X9 F1S1X9         |         | 0             | 0          | 1          | 0              | 0              | 0              | 2              | 5              | 0          | 0          | 1              | 0              | 0              | 2              | 12                | 0.0%       | 0.0%       | 2.2%           | 0.0%           | 0.0%           | 0.0%           | 4.9%  |
| tr F1SD57 F1SD57         |         | 0             | 0          | 1          | 0              | 0              | 0              | 1              | 4              | 0          | 0          | 2              | 0              | 0              | 4              | 21                | 0.0%       | 0.0%       | 4.7%           | 0.0%           | 0.0%           | 0.0%           | 4.7%  |
| tr F1SD58 F1SD58         |         | 0             | 0          | 2          | 0              | 0              | 0              | 1              | 5              | 0          | 0          | 3              | 0              | 0              | 4              | 22                | 0.0%       | 0.0%       | 7.1%           | 0.0%           | 0.0%           | 0.0%           | 4.1%  |
| tr F1RPA3 F1RPA3         |         | 0             | 0          | 1          | 0              | 0              | 0              | 2              | 2              | 0          | 0          | 4              | 0              | 0              | 12             | 17                | 0.0%       | 0.0%       | 3.5%           | 0.0%           | 0.0%           | 0.0%           | 6.6%  |
| tr I3LSZ1 I3LSZ1         |         | 0             | 0          | 1          | 0              | 0              | 0              | 1              | 2              | 0          | 0          | 2              | 0              | 0              | 7              | 7                 | 0.0%       | 0.0%       | 6.0%           | 0.0%           | 0.0%           | 0.0%           | 6.0%  |
| tr I3L7W9 I3L7W9         |         | 0             | 0          | 2          | 0              | 0              | 0              | 0              | 2              | 0          | 0          | 4              | 0              | 0              | 0              | 27                | 0.0%       | 0.0%       | 6.5%           | 0.0%           | 0.0%           | 0.0%           | 6.5%  |
| tr I3LSR2 I3LSR2         |         | 0             | 0          | 2          | 0              | 0              | 0              | 0              | 2              | 0          | 0          | 4              | 0              | 0              | 0              | 27                | 0.0%       | 0.0%       | 7.9%           | 0.0%           | 0.0%           | 0.0%           | 7.9%  |
| tr F1S2F5 F1S2F5         |         | 0             | 0          | 1          | 0              | 0              | 0              | 0              | 2              | 0          | 0          | 2              | 0              | 0              | 0              | 13                | 0.0%       | 0.0%       | 11.0%          | 0.0%           | 0.0%           | 0.0%           | 14.9% |
| Q2MUJ8                   |         | 0             | 0          | 2          | 0              | 0              | 0              | 4              | 7              | 0          | 0          | 9              | 0              | 0              | 24             | 32                | 0.0%       | 0.0%       | 14.2%          | 0.0%           | 0.0%           | 0.0%           | 26.4% |
| tr F1RWM5 F1RWM5         |         | 0             | 0          | 1          | 0              | 0              | 0              | 0              | 8              | 0          | 0          | 4              | 0              | 0              | 0              | 24                | 0.0%       | 0.0%       | 1.7%           | 0.0%           | 0.0%           | 0.0%           | 13.4% |
| tr K7G543 K7G543         |         | 0             | 0          | 1          | 0              | 0              | 0              | 0              | 8              | 0          | 0          | 4              | 0              | 0              | 0              | 24                | 0.0%       | 0.0%       | 1.7%           | 0.0%           | 0.0%           | 0.0%           | 13.4% |
| tr F1RZJ0 F1RZJ0         |         | 0             | 0          | 2          | 0              | 0              | 0              | 0              | 4              | 0          | 0          | 3              | 0              | 0              | 0              | 17                | 0.0%       | 0.0%       | 5.4%           | 0.0%           | 0.0%           | 0.0%           | 11.8% |
| tr F1S6R4 F1S6R4         |         |               |            |            |                |                |                |                |                |            |            |                |                |                |                |                   |            |            |                |                |                |                |       |

| Sample#                  | Peptide Count |            |            |                |                |                |                |   | Spectral Count |            |            |                |                |                |                |    | Sequence Coverage |            |            |                |                |                |                |                |       |
|--------------------------|---------------|------------|------------|----------------|----------------|----------------|----------------|---|----------------|------------|------------|----------------|----------------|----------------|----------------|----|-------------------|------------|------------|----------------|----------------|----------------|----------------|----------------|-------|
|                          | Whole Cell    | Whole Cell | Whole Cell | Cilia Fraction | Cilia Fraction | Cilia Fraction | Cilia Fraction |   | Whole Cell     | Whole Cell | Whole Cell | Cilia Fraction | Cilia Fraction | Cilia Fraction | Cilia Fraction |    | Whole Cell        | Whole Cell | Whole Cell | Cilia Fraction |       |
|                          | 1             | 2          | 6          | 4              | 3              | 5              | 7              | 8 | 1              | 2          | 6          | 4              | 3              | 5              | 7              | 8  | 1                 | 2          | 6          | 4              | 3              | 5              | 7              | 8              |       |
| Accession                |               |            |            |                |                |                |                |   |                |            |            |                |                |                |                |    |                   |            |            |                |                |                |                |                |       |
| tr F1RIP1 F1RIP1         | 0             | 0          | 1          | 0              | 0              | 0              | 0              | 2 | 0              | 0          | 2          | 0              | 0              | 0              | 0              | 5  | 0.0%              | 0.0%       | 4.1%       | 0.0%           | 0.0%           | 0.0%           | 0.0%           | 5.3%           |       |
| tr F1RF14 F1RF14         | 0             | 0          | 2          | 0              | 0              | 0              | 1              | 1 | 0              | 0          | 4          | 0              | 0              | 0              | 0              | 7  | 2.0%              | 0.0%       | 7.9%       | 0.0%           | 0.0%           | 0.0%           | 4.1%           | 4.1%           |       |
| Reverse_tr F1SER9 F1SER9 | 0             | 0          | 1          | 0              | 0              | 0              | 1              | 1 | 0              | 0          | 5          | 0              | 0              | 0              | 0              | 4  | 7.0%              | 0.0%       | 0.6%       | 0.0%           | 0.0%           | 0.0%           | 0.6%           | 0.6%           |       |
| tr I3LSF9 I3LSF9         | 0             | 0          | 1          | 0              | 0              | 0              | 1              | 1 | 0              | 0          | 5          | 0              | 0              | 0              | 0              | 8  | 2.0%              | 0.0%       | 16.2%      | 0.0%           | 0.0%           | 0.0%           | 16.2%          | 16.2%          |       |
| tr F1S1W0 F1S1W0         | 0             | 0          | 2          | 0              | 0              | 0              | 0              | 1 | 0              | 0          | 3          | 0              | 0              | 0              | 0              | 0  | 6.0%              | 0.0%       | 15.9%      | 0.0%           | 0.0%           | 0.0%           | 0.0%           | 4.7%           |       |
| tr F1SDG3 F1SDG3         | 0             | 0          | 1          | 0              | 0              | 0              | 0              | 1 | 0              | 0          | 1          | 0              | 0              | 0              | 0              | 2  | 0.0%              | 0.0%       | 2.3%       | 0.0%           | 0.0%           | 0.0%           | 0.0%           | 3.3%           |       |
| tr F1SQ02 F1SQ02         | 0             | 0          | 2          | 0              | 0              | 0              | 0              | 7 | 0              | 0          | 11         | 0              | 0              | 0              | 0              | 21 | 0.0%              | 0.0%       | 6.1%       | 0.0%           | 0.0%           | 0.0%           | 0.0%           | 18.9%          |       |
| tr F1SV11 F1SV11         | 0             | 0          | 1          | 0              | 0              | 0              | 1              | 2 | 0              | 0          | 4          | 0              | 0              | 0              | 0              | 3  | 4.0%              | 0.0%       | 2.0%       | 0.0%           | 0.0%           | 0.0%           | 2.0%           | 2.0%           |       |
| F1RT67                   | 0             | 0          | 2          | 0              | 0              | 0              | 0              | 1 | 0              | 0          | 7          | 0              | 0              | 0              | 0              | 8  | 0.0%              | 0.0%       | 8.6%       | 0.0%           | 0.0%           | 0.0%           | 0.0%           | 8.9%           |       |
| tr I3LA61 I3LA61         | 0             | 0          | 1          | 0              | 0              | 0              | 0              | 1 | 0              | 0          | 2          | 0              | 0              | 0              | 0              | 0  | 2.0%              | 0.0%       | 2.3%       | 0.0%           | 0.0%           | 0.0%           | 0.0%           | 4.6%           |       |
| tr F1RN91 F1RN91         | 0             | 0          | 1          | 0              | 0              | 0              | 1              | 1 | 0              | 0          | 2          | 0              | 0              | 0              | 0              | 1  | 1.0%              | 0.0%       | 1.5%       | 0.0%           | 0.0%           | 0.0%           | 1.5%           | 1.6%           |       |
| tr F1SB91 F1SB91         | 0             | 0          | 1          | 0              | 0              | 0              | 0              | 1 | 0              | 0          | 2          | 0              | 0              | 0              | 0              | 2  | 0.0%              | 0.0%       | 2.2%       | 0.0%           | 0.0%           | 0.0%           | 0.0%           | 4.5%           |       |
| tr I3L7J4 I3L7J4         | 0             | 0          | 1          | 0              | 0              | 0              | 0              | 1 | 0              | 0          | 1          | 0              | 0              | 0              | 0              | 0  | 1.0%              | 0.0%       | 1.9%       | 0.0%           | 0.0%           | 0.0%           | 0.0%           | 3.1%           |       |
| Reverse_tr I3LGH8 I3LGH8 | 0             | 0          | 1          | 0              | 0              | 0              | 0              | 1 | 0              | 0          | 1          | 0              | 0              | 0              | 0              | 0  | 1.0%              | 0.0%       | 8.6%       | 0.0%           | 0.0%           | 0.0%           | 0.0%           | 8.6%           |       |
| tr F1SJE5 F1SJE5         | 0             | 0          | 1          | 0              | 0              | 0              | 0              | 1 | 0              | 0          | 1          | 0              | 0              | 0              | 0              | 0  | 1.0%              | 0.0%       | 13.7%      | 0.0%           | 0.0%           | 0.0%           | 0.0%           | 13.7%          |       |
| tr F1S0L5 F1S0L5         | 0             | 0          | 1          | 0              | 0              | 0              | 0              | 1 | 0              | 0          | 1          | 0              | 0              | 0              | 0              | 0  | 1.0%              | 0.0%       | 7.3%       | 0.0%           | 0.0%           | 0.0%           | 0.0%           | 6.3%           |       |
| tr F1SFE2 F1SFE2         | 0             | 0          | 1          | 0              | 0              | 0              | 0              | 1 | 0              | 0          | 1          | 0              | 0              | 0              | 0              | 0  | 1.0%              | 0.0%       | 4.7%       | 0.0%           | 0.0%           | 0.0%           | 0.0%           | 6.8%           |       |
| tr F1RJH8 F1RJH8         | 0             | 0          | 1          | 0              | 0              | 0              | 1              | 0 | 0              | 0          | 1          | 0              | 0              | 0              | 0              | 1  | 0.0%              | 0.0%       | 3.2%       | 0.0%           | 0.0%           | 0.0%           | 4.7%           | 0.0%           |       |
| tr I3LPD2 I3LPD2         | 0             | 0          | 2          | 0              | 0              | 0              | 0              | 1 | 2              | 0          | 0          | 11             | 0              | 0              | 0              | 4  | 6.0%              | 0.0%       | 4.2%       | 0.0%           | 0.0%           | 0.0%           | 3.7%           | 4.2%           |       |
| tr F1SIN8 F1SIN8         | 0             | 0          | 2          | 0              | 0              | 0              | 1              | 2 | 0              | 0          | 11         | 0              | 0              | 0              | 0              | 4  | 6.0%              | 0.0%       | 4.0%       | 0.0%           | 0.0%           | 0.0%           | 3.5%           | 4.0%           |       |
| tr F1RNR7 F1RNR7         | 0             | 0          | 1          | 0              | 0              | 0              | 0              | 1 | 0              | 0          | 4          | 0              | 0              | 0              | 0              | 3  | 0.0%              | 0.0%       | 9.4%       | 0.0%           | 0.0%           | 0.0%           | 0.0%           | 4.9%           |       |
| tr F1RN89 F1RN89         | 0             | 0          | 1          | 0              | 0              | 0              | 0              | 1 | 0              | 0          | 3          | 0              | 0              | 0              | 0              | 0  | 2.0%              | 0.0%       | 3.2%       | 0.0%           | 0.0%           | 0.0%           | 0.0%           | 4.7%           |       |
| tr F1SMS9 F1SMS9         | 0             | 0          | 1          | 0              | 0              | 0              | 0              | 1 | 0              | 0          | 3          | 0              | 0              | 0              | 0              | 0  | 2.0%              | 0.0%       | 3.3%       | 0.0%           | 0.0%           | 0.0%           | 0.0%           | 3.3%           |       |
| tr I3LKC9 I3LKC9         | 0             | 0          | 2          | 0              | 0              | 0              | 1              | 1 | 0              | 0          | 8          | 0              | 0              | 0              | 0              | 3  | 2.0%              | 0.0%       | 9.9%       | 0.0%           | 0.0%           | 0.0%           | 9.9%           | 9.9%           |       |
| tr F1S4P4 F1S4P4         | 0             | 0          | 1          | 0              | 0              | 0              | 2              | 0 | 0              | 0          | 8          | 0              | 0              | 0              | 0              | 5  | 0.0%              | 0.0%       | 7.8%       | 0.0%           | 0.0%           | 0.0%           | 14.2%          | 0.0%           |       |
| tr F1SU35 F1SU35         | 0             | 0          | 1          | 0              | 0              | 0              | 0              | 1 | 0              | 0          | 4          | 0              | 0              | 0              | 0              | 0  | 2.0%              | 0.0%       | 5.6%       | 0.0%           | 0.0%           | 0.0%           | 0.0%           | 11.0%          |       |
| tr K7GM10 K7GM10         | 0             | 0          | 1          | 0              | 0              | 0              | 0              | 1 | 0              | 0          | 4          | 0              | 0              | 0              | 0              | 0  | 2.0%              | 0.0%       | 8.6%       | 0.0%           | 0.0%           | 0.0%           | 0.0%           | 6.5%           |       |
| tr K7GNV9 K7GNV9         | 0             | 0          | 1          | 0              | 0              | 0              | 0              | 1 | 0              | 0          | 4          | 0              | 0              | 0              | 0              | 0  | 2.0%              | 0.0%       | 12.0%      | 0.0%           | 0.0%           | 0.0%           | 0.0%           | 9.0%           |       |
| tr F1REY0 F1REY0         | 0             | 0          | 1          | 0              | 0              | 0              | 1              | 0 | 0              | 0          | 2          | 0              | 0              | 0              | 0              | 1  | 0.0%              | 0.0%       | 6.3%       | 0.0%           | 0.0%           | 0.0%           | 8.7%           | 0.0%           |       |
| tr I3LNH7 I3LNH7         | 0             | 0          | 1          | 0              | 0              | 0              | 0              | 1 | 0              | 0          | 2          | 0              | 0              | 0              | 0              | 0  | 1.0%              | 0.0%       | 5.8%       | 0.0%           | 0.0%           | 0.0%           | 0.0%           | 9.7%           |       |
| tr I3L810 I3L810         | 0             | 0          | 1          | 0              | 0              | 0              | 0              | 1 | 0              | 0          | 2          | 0              | 0              | 0              | 0              | 0  | 1.0%              | 0.0%       | 5.8%       | 0.0%           | 0.0%           | 0.0%           | 0.0%           | 6.2%           |       |
| tr F1RL41 F1RL41         | 0             | 0          | 2          | 0              | 0              | 0              | 0              | 1 | 0              | 0          | 2          | 0              | 0              | 0              | 0              | 0  | 1.0%              | 0.0%       | 7.3%       | 0.0%           | 0.0%           | 0.0%           | 0.0%           | 6.8%           |       |
| tr I3LK22 I3LK22         | 0             | 0          | 1          | 0              | 0              | 0              | 0              | 1 | 0              | 0          | 2          | 0              | 0              | 0              | 0              | 0  | 1.0%              | 0.0%       | 3.3%       | 0.0%           | 0.0%           | 0.0%           | 0.0%           | 2.9%           |       |
| tr I3LM16 I3LM16         | 0             | 0          | 3          | 0              | 0              | 0              | 1              | 0 | 0              | 0          | 10         | 0              | 0              | 0              | 0              | 4  | 0.0%              | 0.0%       | 17.1%      | 0.0%           | 0.0%           | 0.0%           | 7.1%           | 0.0%           |       |
| tr F1RWM4 F1RWM4         | 0             | 0          | 1          | 0              | 0              | 0              | 0              | 1 | 0              | 0          | 5          | 0              | 0              | 0              | 0              | 0  | 2.0%              | 0.0%       | 16.9%      | 0.0%           | 0.0%           | 0.0%           | 0.0%           | 16.9%          |       |
| tr I3LM89 I3LM89         | 0             | 0          | 1          | 0              | 0              | 0              | 1              | 0 | 0              | 0          | 3          | 0              | 0              | 0              | 0              | 1  | 0.0%              | 0.0%       | 30.0%      | 0.0%           | 0.0%           | 0.0%           | 30.0%          | 0.0%           |       |
| tr F1RTT0 F1RTT0         | 0             | 0          | 1          | 0              | 0              | 0              | 0              | 1 | 0              | 0          | 3          | 0              | 0              | 0              | 0              | 0  | 1.0%              | 0.0%       | 3.4%       | 0.0%           | 0.0%           | 0.0%           | 0.0%           | 2.8%           |       |
| tr F1RG09 F1RG09         | 0             | 0          | 1          | 0              | 0              | 0              | 0              | 1 | 0              | 0          | 3          | 0              | 0              | 0              | 0              | 0  | 1.0%              | 0.0%       | 3.2%       | 0.0%           | 0.0%           | 0.0%           | 0.0%           | 3.2%           |       |
| tr F2Z5S6 F2Z5S6         | 0             | 0          | 2          | 0              | 0              | 0              | 1              | 1 | 0              | 0          | 7          | 0              | 0              | 0              | 0              | 1  | 1.0%              | 0.0%       | 22.7%      | 0.0%           | 0.0%           | 0.0%           | 10.7%          | 10.7%          |       |
| tr F2Z563 F2Z563         | 0             | 0          | 1          | 0              | 0              | 0              | 0              | 1 | 0              | 0          | 8          | 0              | 0              | 0              | 0              | 0  | 2.0%              | 0.0%       | 7.0%       | 0.0%           | 0.0%           | 0.0%           | 0.0%           | 19.2%          |       |
| tr K7GSE5 K7GSE5         | 0             | 0          | 2          | 0              | 0              | 0              | 0              | 1 | 0              | 0          | 20         | 0              | 0              | 0              | 0              | 1  | 3.0%              | 0.0%       | 22.3%      | 0.0%           | 0.0%           | 0.0%           | 15.6%          | 15.6%          |       |
| tr F1RRP9 F1RRP9         | 0             | 0          | 2          | 0              | 0              | 0              | 1              | 1 | 0              | 0          | 20         | 0              | 0              | 0              | 0              | 1  | 3.0%              | 0.0%       | 22.2%      | 0.0%           | 0.0%           | 0.0%           | 15.6%          | 15.6%          |       |
| tr F1SUF3 F1SUF3         | 0             | 0          | 1          | 0              | 0              | 0              | 0              | 1 | 0              | 0          | 10         | 0              | 0              | 0              | 0              | 0  | 2.0%              | 0.0%       | 1.3%       | 0.0%           | 0.0%           | 0.0%           | 0.0%           | 2.6%           |       |
| tr F1S4I1 F1S4I1         | 0             | 0          | 2          | 0              | 0              | 0              | 1              | 0 | 0              | 0          | 5          | 0              | 0              | 0              | 0              | 1  | 0.0%              | 0.0%       | 10.3%      | 0.0%           | 0.0%           | 0.0%           | 2.9%           | 0.0%           |       |
| Q6J1I8                   | 0             | 0          | 1          | 0              | 0              | 0              | 0              | 1 | 0              | 0          | 5          | 0              | 0              | 0              | 0              | 0  | 1.0%              | 0.0%       | 7.9%       | 0.0%           | 0.0%           | 0.0%           | 0.0%           | 11.0%          |       |
| tr F2Z5W4 F2Z5W4         | 0             | 0          | 3          | 0              | 0              | 0              | 1              | 2 | 0              | 0          | 170        | 0              | 0              | 0              | 0              | 12 | 14                | 0.0%       | 0.0%       | 37.6%          | 0.0%           | 0.0%           | 0.0%           | 7.5%           | 23.3% |
| tr F1RR65 F1RR65         | 0             | 0          | 1          | 0              | 0              | 0              | 0              | 1 | 0              | 0          | 7          | 0              | 0              | 0              | 0              | 0  | 1.0%              | 0.0%       | 5.0%       | 0.0%           | 0.0%           | 0.0%           | 0.0%           | 2.8%           |       |
| tr F1SCL3 F1SCL3         | 0             | 0          | 1          | 0              | 0              | 0              | 0              | 1 | 0              | 0          | 8          | 0              | 0              | 0              | 0              | 0  | 1.0%              | 0.0%       | 3.7%       | 0.0%           | 0.0%           | 0.0%           | 0.0%           | 5.1%           |       |
| tr F1SCM6 F1SCM6         | 0             | 0          | 1          | 0              | 0              | 0              | 0              | 1 | 0              | 0          | 8          | 0              | 0              | 0              | 0              | 0  | 1.0%              | 0.0%       | 3.7%       | 0.0%           | 0.0%           | 0.0%           | 0.0%           | 5.1%           |       |
| tr F1S829 F1S829         | 0             | 0          | 4          | 0              | 0              | 0              | 0              | 1 | 0              | 0          | 11         | 0              | 0              | 0              | 0              | 0  | 1.0%              | 0.0%       | 8.8%       | 0.0%           | 0.0%           | 0.0%           | 0.0%           | 4.0%           |       |
| tr F1SHW1 F1SHW1         | 0             | 0          | 2          | 0              | 0              | 0              | 1              | 0 | 0              | 0          | 15         | 0              | 0              | 0              | 0              | 1  | 0.0%              | 0.0%       | 4.1%       | 0.0%           | 0.0%           | 0.0%           | 2.2%           | 0.0%           |       |
| P00172                   | 0             | 0          | 6          | 0              | 0              | 0              | 0              | 1 | 0              | 0          | 41         | 0              | 0              | 0              | 0              | 0  | 1.0%              | 0.0%       | 34.3%      | 0.0%           | 0.0%           | 0.0%           | 0.0%           | 9.7%           |       |
| Reverse_tr F1RL39 F1RL39 | 0             | 0          | 1          | 0              | 0              | 0              | 0              | 0 | 0              | 0          | 1          | 0              | 0              | 0              | 0              | 0  | 0.0%              | 0.0%       | 0.8%       | 0.0%           | 0.0%           | 0.0%           | 0.0%           | 0.0%           |       |
| Reverse_tr K7GN95 K7GN95 | 0             | 0          | 1          | 0              | 0              | 0              | 0              | 0 | 0              | 0          | 1          | 0              | 0              | 0              | 0              | 0  | 0.0%              | 0.0%       | 2.1%       | 0.0%           | 0.0%           | 0.0%           | 0.0%           | 0.0%           |       |
| tr F1SGC0 F1SGC0         | 0             | 0          | 1          | 0              | 0              | 0              | 0              | 0 | 0              | 0          | 1          | 0              | 0              | 0              | 0              | 0  | 0.0%              | 0.0%       | 3.0%       | 0.0%           | 0.0%           | 0.0%           | 0.0%           | 0.0%           |       |
| Q19QU3                   | 0             | 0          | 1          | 0              | 0              | 0              | 0              | 0 | 0              | 0          | 1          | 0              | 0              | 0              | 0              | 0  | 0.0%              | 0.0%       | 3.7%       | 0.0%           | 0.0%           | 0.0%           | 0.0%           | 0.0%           |       |
| tr F1RWL3 F1RWL3         | 0             | 0          | 1          | 0              | 0              | 0              | 0              | 0 | 0              | 0          | 1          | 0              | 0              | 0              | 0              | 0  | 0.0%              | 0.0%       | 0.8%       | 0.0%           | 0.0%           | 0.0%           | 0.0%           | 0.0%           |       |
| tr F1SR48 F1SR48         | 0             | 0          | 1          | 0              | 0              | 0              | 0              | 0 | 0              | 0          | 1          | 0              | 0              | 0              | 0              | 0  | 0.0%              | 0.0%       | 65.7%      | 0.0%           | 0.0%           | 0.0%           | 0.0%           | 0.0%           |       |
| tr F1RUA7 F1RUA7         | 0             | 0          | 1          | 0              | 0              | 0              | 0              | 0 | 0              | 0          | 1          | 0              | 0              | 0              | 0              | 0  | 0.0%              | 0.0%       | 3.8%       | 0.0%           | 0.0%           | 0.0%           | 0.0%           | 0.0%           |       |
| tr I3LIL8 I3LIL8         | 0             | 0          | 1          | 0              | 0              | 0              | 0              | 0 | 0              | 0          | 1          | 0              | 0              | 0              | 0              | 0  | 0.0%              | 0.0%       | 9.0%       | 0.0%           | 0.0%           | 0.0%           | 0.0%           | 0.0%           |       |
| tr F1RXM3 F1RXM3         | 0             | 0          | 1          | 0              | 0              | 0              | 0              | 0 | 0              | 0          | 1          | 0              | 0              | 0              | 0              | 0  | 0.0%              | 0.0%       | 4.8%       | 0.0%           | 0.0%           | 0.0%           | 0.0%           | 0.0%           |       |
| tr I3LPV8 I3LPV8         | 0             | 0          | 1          | 0              | 0              | 0              | 0              | 0 | 0              | 0          | 1          | 0              | 0              | 0              | 0              | 0  | 0.0%              | 0.0%       | 2.8%       | 0.0%           | 0.0%           | 0.0%           | 0.0%           | 0.0%           |       |
| tr K7GMJ5 K7GMJ5         | 0             | 0          | 1          | 0              | 0              | 0              | 0              | 0 | 0              | 0          | 1          | 0              | 0              | 0              | 0              | 0  | 0.0%              | 0.0%       | 7.5%       | 0.0%           | 0.0%           | 0.0%           | 0.0%           | 0.0%           |       |
| tr                       |               |            |            |                |                |                |                |   |                |            |            |                |                |                |                |    |                   |            |            |                |                |                |                |                |       |

| Sample#                  | Peptide Count |            |            |                |                |                |                |   | Spectral Count |            |            |                |                |                |                |   | Sequence Coverage |            |            |                |                |                |                |                |
|--------------------------|---------------|------------|------------|----------------|----------------|----------------|----------------|---|----------------|------------|------------|----------------|----------------|----------------|----------------|---|-------------------|------------|------------|----------------|----------------|----------------|----------------|----------------|
|                          | Whole Cell    | Whole Cell | Whole Cell | Cilia Fraction | Cilia Fraction | Cilia Fraction | Cilia Fraction |   | Whole Cell     | Whole Cell | Whole Cell | Cilia Fraction | Cilia Fraction | Cilia Fraction | Cilia Fraction |   | Whole Cell        | Whole Cell | Whole Cell | Cilia Fraction |
|                          | 1             | 2          | 6          | 4              | 3              | 5              | 7              | 8 | 1              | 2          | 6          | 4              | 3              | 5              | 7              | 8 | 1                 | 2          | 6          | 4              | 3              | 5              | 7              | 8              |
| Accession                |               |            |            |                |                |                |                |   |                |            |            |                |                |                |                |   |                   |            |            |                |                |                |                |                |
| tr F1SMY9 F1SMY9         | 0             | 0          | 1          | 0              | 0              | 0              | 0              | 0 | 0              | 0          | 1          | 0              | 0              | 0              | 0              | 0 | 0.0%              | 0.0%       | 3.9%       | 0.0%           | 0.0%           | 0.0%           | 0.0%           | 0.0%           |
| tr I3LSM8 I3LSM8         | 0             | 0          | 1          | 0              | 0              | 0              | 0              | 0 | 0              | 0          | 1          | 0              | 0              | 0              | 0              | 0 | 0.0%              | 0.0%       | 5.2%       | 0.0%           | 0.0%           | 0.0%           | 0.0%           | 0.0%           |
| tr F1RIB4 F1RIB4         | 0             | 0          | 1          | 0              | 0              | 0              | 0              | 0 | 0              | 0          | 1          | 0              | 0              | 0              | 0              | 0 | 0.0%              | 0.0%       | 9.7%       | 0.0%           | 0.0%           | 0.0%           | 0.0%           | 0.0%           |
| tr F1RJX9 F1RJX9         | 0             | 0          | 1          | 0              | 0              | 0              | 0              | 0 | 0              | 0          | 1          | 0              | 0              | 0              | 0              | 0 | 0.0%              | 0.0%       | 4.7%       | 0.0%           | 0.0%           | 0.0%           | 0.0%           | 0.0%           |
| tr F1SSM5 F1SSM5         | 0             | 0          | 1          | 0              | 0              | 0              | 0              | 0 | 0              | 0          | 1          | 0              | 0              | 0              | 0              | 0 | 0.0%              | 0.0%       | 7.1%       | 0.0%           | 0.0%           | 0.0%           | 0.0%           | 0.0%           |
| tr F1S1D3 F1S1D3         | 0             | 0          | 1          | 0              | 0              | 0              | 0              | 0 | 0              | 0          | 1          | 0              | 0              | 0              | 0              | 0 | 0.0%              | 0.0%       | 3.7%       | 0.0%           | 0.0%           | 0.0%           | 0.0%           | 0.0%           |
| tr I3LFE2 I3LFE2         | 0             | 0          | 1          | 0              | 0              | 0              | 0              | 0 | 0              | 0          | 1          | 0              | 0              | 0              | 0              | 0 | 0.0%              | 0.0%       | 10.6%      | 0.0%           | 0.0%           | 0.0%           | 0.0%           | 0.0%           |
| tr K7GLI8 K7GLI8         | 0             | 0          | 1          | 0              | 0              | 0              | 0              | 0 | 0              | 0          | 1          | 0              | 0              | 0              | 0              | 0 | 0.0%              | 0.0%       | 1.9%       | 0.0%           | 0.0%           | 0.0%           | 0.0%           | 0.0%           |
| Reverse_tr K7GRX6 K7GRX6 | 0             | 0          | 1          | 0              | 0              | 0              | 0              | 0 | 0              | 0          | 1          | 0              | 0              | 0              | 0              | 0 | 0.0%              | 0.0%       | 2.5%       | 0.0%           | 0.0%           | 0.0%           | 0.0%           | 0.0%           |
| tr I3LM95 I3LM95         | 0             | 0          | 1          | 0              | 0              | 0              | 0              | 0 | 0              | 0          | 1          | 0              | 0              | 0              | 0              | 0 | 0.0%              | 0.0%       | 4.7%       | 0.0%           | 0.0%           | 0.0%           | 0.0%           | 0.0%           |
| tr F1S577 F1S577         | 0             | 0          | 1          | 0              | 0              | 0              | 0              | 0 | 0              | 0          | 1          | 0              | 0              | 0              | 0              | 0 | 0.0%              | 0.0%       | 5.3%       | 0.0%           | 0.0%           | 0.0%           | 0.0%           | 0.0%           |
| tr F1RXR2 F1RXR2         | 0             | 0          | 1          | 0              | 0              | 0              | 0              | 0 | 0              | 0          | 1          | 0              | 0              | 0              | 0              | 0 | 0.0%              | 0.0%       | 10.8%      | 0.0%           | 0.0%           | 0.0%           | 0.0%           | 0.0%           |
| tr I3LUD4 I3LUD4         | 0             | 0          | 1          | 0              | 0              | 0              | 0              | 0 | 0              | 0          | 1          | 0              | 0              | 0              | 0              | 0 | 0.0%              | 0.0%       | 3.4%       | 0.0%           | 0.0%           | 0.0%           | 0.0%           | 0.0%           |
| Reverse_tr F1RMP2 F1RMP2 | 0             | 0          | 1          | 0              | 0              | 0              | 0              | 0 | 0              | 0          | 1          | 0              | 0              | 0              | 0              | 0 | 0.0%              | 0.0%       | 0.4%       | 0.0%           | 0.0%           | 0.0%           | 0.0%           | 0.0%           |
| tr I3LCV9 I3LCV9         | 0             | 0          | 1          | 0              | 0              | 0              | 0              | 0 | 0              | 0          | 1          | 0              | 0              | 0              | 0              | 0 | 0.0%              | 0.0%       | 1.4%       | 0.0%           | 0.0%           | 0.0%           | 0.0%           | 0.0%           |
| tr F1SUA4 F1SUA4         | 0             | 0          | 1          | 0              | 0              | 0              | 0              | 0 | 0              | 0          | 1          | 0              | 0              | 0              | 0              | 0 | 0.0%              | 0.0%       | 15.7%      | 0.0%           | 0.0%           | 0.0%           | 0.0%           | 0.0%           |
| tr I3LTH5 I3LTH5         | 0             | 0          | 1          | 0              | 0              | 0              | 0              | 0 | 0              | 0          | 1          | 0              | 0              | 0              | 0              | 0 | 0.0%              | 0.0%       | 1.1%       | 0.0%           | 0.0%           | 0.0%           | 0.0%           | 0.0%           |
| Reverse_tr F1SPX1 F1SPX1 | 0             | 0          | 1          | 0              | 0              | 0              | 0              | 0 | 0              | 0          | 1          | 0              | 0              | 0              | 0              | 0 | 0.0%              | 0.0%       | 1.0%       | 0.0%           | 0.0%           | 0.0%           | 0.0%           | 0.0%           |
| tr I3LA87 I3LA87         | 0             | 0          | 1          | 0              | 0              | 0              | 0              | 0 | 0              | 0          | 1          | 0              | 0              | 0              | 0              | 0 | 0.0%              | 0.0%       | 7.0%       | 0.0%           | 0.0%           | 0.0%           | 0.0%           | 0.0%           |
| Reverse_tr F1SD92 F1SD92 | 0             | 0          | 1          | 0              | 0              | 0              | 0              | 0 | 0              | 0          | 1          | 0              | 0              | 0              | 0              | 0 | 0.0%              | 0.0%       | 1.7%       | 0.0%           | 0.0%           | 0.0%           | 0.0%           | 0.0%           |
| tr I3L692 I3L692         | 0             | 0          | 1          | 0              | 0              | 0              | 0              | 0 | 0              | 0          | 1          | 0              | 0              | 0              | 0              | 0 | 0.0%              | 0.0%       | 8.8%       | 0.0%           | 0.0%           | 0.0%           | 0.0%           | 0.0%           |
| tr F1SD95 F1SD95         | 0             | 0          | 1          | 0              | 0              | 0              | 0              | 0 | 0              | 0          | 1          | 0              | 0              | 0              | 0              | 0 | 0.0%              | 0.0%       | 5.0%       | 0.0%           | 0.0%           | 0.0%           | 0.0%           | 0.0%           |
| tr I3L6A4 I3L6A4         | 0             | 0          | 1          | 0              | 0              | 0              | 0              | 0 | 0              | 0          | 1          | 0              | 0              | 0              | 0              | 0 | 0.0%              | 0.0%       | 14.5%      | 0.0%           | 0.0%           | 0.0%           | 0.0%           | 0.0%           |
| tr K7GQX7 K7GQX7         | 0             | 0          | 1          | 0              | 0              | 0              | 0              | 0 | 0              | 0          | 1          | 0              | 0              | 0              | 0              | 0 | 0.0%              | 0.0%       | 9.5%       | 0.0%           | 0.0%           | 0.0%           | 0.0%           | 0.0%           |
| tr F1RRQ0 F1RRQ0         | 0             | 0          | 1          | 0              | 0              | 0              | 0              | 0 | 0              | 0          | 1          | 0              | 0              | 0              | 0              | 0 | 0.0%              | 0.0%       | 4.1%       | 0.0%           | 0.0%           | 0.0%           | 0.0%           | 0.0%           |
| tr F1SPE8 F1SPE8         | 0             | 0          | 1          | 0              | 0              | 0              | 0              | 0 | 0              | 0          | 1          | 0              | 0              | 0              | 0              | 0 | 0.0%              | 0.0%       | 3.7%       | 0.0%           | 0.0%           | 0.0%           | 0.0%           | 0.0%           |
| Reverse_tr F1S9Y8 F1S9Y8 | 0             | 0          | 1          | 0              | 0              | 0              | 0              | 0 | 0              | 0          | 1          | 0              | 0              | 0              | 0              | 0 | 0.0%              | 0.0%       | 0.4%       | 0.0%           | 0.0%           | 0.0%           | 0.0%           | 0.0%           |
| Q8MIR4                   | 0             | 0          | 1          | 0              | 0              | 0              | 0              | 0 | 0              | 0          | 1          | 0              | 0              | 0              | 0              | 0 | 0.0%              | 0.0%       | 3.2%       | 0.0%           | 0.0%           | 0.0%           | 0.0%           | 0.0%           |
| tr F1SHS4 F1SHS4         | 0             | 0          | 1          | 0              | 0              | 0              | 0              | 0 | 0              | 0          | 1          | 0              | 0              | 0              | 0              | 0 | 0.0%              | 0.0%       | 2.0%       | 0.0%           | 0.0%           | 0.0%           | 0.0%           | 0.0%           |
| tr I3LR64 I3LR64         | 0             | 0          | 1          | 0              | 0              | 0              | 0              | 0 | 0              | 0          | 1          | 0              | 0              | 0              | 0              | 0 | 0.0%              | 0.0%       | 7.1%       | 0.0%           | 0.0%           | 0.0%           | 0.0%           | 0.0%           |
| tr I3LNY4 I3LNY4         | 0             | 0          | 1          | 0              | 0              | 0              | 0              | 0 | 0              | 0          | 1          | 0              | 0              | 0              | 0              | 0 | 0.0%              | 0.0%       | 5.1%       | 0.0%           | 0.0%           | 0.0%           | 0.0%           | 0.0%           |
| tr F1RVR8 F1RVR8         | 0             | 0          | 1          | 0              | 0              | 0              | 0              | 0 | 0              | 0          | 1          | 0              | 0              | 0              | 0              | 0 | 0.0%              | 0.0%       | 2.4%       | 0.0%           | 0.0%           | 0.0%           | 0.0%           | 0.0%           |
| tr F1S592 F1S592         | 0             | 0          | 1          | 0              | 0              | 0              | 0              | 0 | 0              | 0          | 1          | 0              | 0              | 0              | 0              | 0 | 0.0%              | 0.0%       | 7.5%       | 0.0%           | 0.0%           | 0.0%           | 0.0%           | 0.0%           |
| Reverse_tr F1SN99 F1SN99 | 0             | 0          | 1          | 0              | 0              | 0              | 0              | 0 | 0              | 0          | 1          | 0              | 0              | 0              | 0              | 0 | 0.0%              | 0.0%       | 0.8%       | 0.0%           | 0.0%           | 0.0%           | 0.0%           | 0.0%           |
| Q8SPR7                   | 0             | 0          | 1          | 0              | 0              | 0              | 0              | 0 | 0              | 0          | 1          | 0              | 0              | 0              | 0              | 0 | 0.0%              | 0.0%       | 1.4%       | 0.0%           | 0.0%           | 0.0%           | 0.0%           | 0.0%           |
| tr F1RX33 F1RX33         | 0             | 0          | 1          | 0              | 0              | 0              | 0              | 0 | 0              | 0          | 1          | 0              | 0              | 0              | 0              | 0 | 0.0%              | 0.0%       | 3.9%       | 0.0%           | 0.0%           | 0.0%           | 0.0%           | 0.0%           |
| tr F1RMW0 F1RMW0         | 0             | 0          | 1          | 0              | 0              | 0              | 0              | 0 | 0              | 0          | 1          | 0              | 0              | 0              | 0              | 0 | 0.0%              | 0.0%       | 8.9%       | 0.0%           | 0.0%           | 0.0%           | 0.0%           | 0.0%           |
| tr F1SA25 F1SA25         | 0             | 0          | 1          | 0              | 0              | 0              | 0              | 0 | 0              | 0          | 1          | 0              | 0              | 0              | 0              | 0 | 0.0%              | 0.0%       | 10.8%      | 0.0%           | 0.0%           | 0.0%           | 0.0%           | 0.0%           |
| tr F1SA40 F1SA40         | 0             | 0          | 1          | 0              | 0              | 0              | 0              | 0 | 0              | 0          | 1          | 0              | 0              | 0              | 0              | 0 | 0.0%              | 0.0%       | 3.9%       | 0.0%           | 0.0%           | 0.0%           | 0.0%           | 0.0%           |
| tr F1SBR3 F1SBR3         | 0             | 0          | 1          | 0              | 0              | 0              | 0              | 0 | 0              | 0          | 1          | 0              | 0              | 0              | 0              | 0 | 0.0%              | 0.0%       | 6.5%       | 0.0%           | 0.0%           | 0.0%           | 0.0%           | 0.0%           |
| tr F1SNZ3 F1SNZ3         | 0             | 0          | 1          | 0              | 0              | 0              | 0              | 0 | 0              | 0          | 1          | 0              | 0              | 0              | 0              | 0 | 0.0%              | 0.0%       | 2.7%       | 0.0%           | 0.0%           | 0.0%           | 0.0%           | 0.0%           |
| tr I3LKJ3 I3LKJ3         | 0             | 0          | 1          | 0              | 0              | 0              | 0              | 0 | 0              | 0          | 1          | 0              | 0              | 0              | 0              | 0 | 0.0%              | 0.0%       | 8.9%       | 0.0%           | 0.0%           | 0.0%           | 0.0%           | 0.0%           |
| tr I3LT16 I3LT16         | 0             | 0          | 1          | 0              | 0              | 0              | 0              | 0 | 0              | 0          | 1          | 0              | 0              | 0              | 0              | 0 | 0.0%              | 0.0%       | 19.5%      | 0.0%           | 0.0%           | 0.0%           | 0.0%           | 0.0%           |
| tr F1S2Z2 F1S2Z2         | 0             | 0          | 1          | 0              | 0              | 0              | 0              | 0 | 0              | 0          | 1          | 0              | 0              | 0              | 0              | 0 | 0.0%              | 0.0%       | 1.7%       | 0.0%           | 0.0%           | 0.0%           | 0.0%           | 0.0%           |
| tr I3LHD4 I3LHD4         | 0             | 0          | 1          | 0              | 0              | 0              | 0              | 0 | 0              | 0          | 1          | 0              | 0              | 0              | 0              | 0 | 0.0%              | 0.0%       | 2.7%       | 0.0%           | 0.0%           | 0.0%           | 0.0%           | 0.0%           |
[truncated: 150,222 more chars]
